# Supplementary material for: Oxygen levels at the time of activation determine T cell persistence and immunotherapeutic efficacy
Source: eLife journal article supplement (doi:10.7554/elife.84280), 2023-05-11
Supplement: fig1-data1 [file Figure 1 - Source Data 1.xlsx]

## Sheet: Fig 1A
		PC025b Aurora				PC022i day3 Canto				PC063b day3 Canto				PC022h day3 Canto				PC022g day3 Canto			PC022f day3 Canto				PC022e day3 Canto			PC022d day3 Canto						ZSCORE	21%O2
CD8					32202.5				374				2568.5				1380			1.755				3.645			4.159			0.399		CD8		CD62L+	#DIV/0!	#DIV/0!	#DIV/0!	#DIV/0!	#DIV/0!	#DIV/0!	#DIV/0!	#DIV/0!	0.817113	0.402809	1.24511	-0.763529	0.900812	0.536939	1.12533
	1%O2	38566	33613	30109	27023	988	1119	945	1099	3138	3671	3568	3332	2364	2337	2132	2072	3.448	3.324	2.993	5.938	6.363	6.821	6.926	4.711	4.986	4.416	0.524	0.546	0.552	1%O2			CD44+	-0.901087	-0.96455	-0.110905	-0.957607	-1.28987	-0.918759	-1.11087	-0.763855	-0.818264	-0.71207	-0.805324	-0.490139	-0.878904	-0.84302	-1.0452
	5%O2	33801	33059	38348	31457	694	627	849	760	2279	2332	2382	2266	1728	1957	1801	1731	2.695	2.63	2.41	4.074	4.219	4.389	4.116	4.462	4.751	4.041	0.368	0.362	0.388	5%O2			CD8	1.35604	-0.260927	-0.33981	-0.821089	-1.02702	-1.31134	-1.20199	-1.31134	-0.858983	-0.303414	-0.32524	-0.402622	-1.09313	-1.07956	-1.44846
	21%O2	37809	32336	32069	30440	437	359	389	359	2319	2599	2588	2549	1392	1397	1261	1368	1.755	1.755	1.681	3.678	3.739	3.612	3.497	4.066	4.575	4.159	0.399	0.411	0.374	21%O2			CD25	#DIV/0!	#DIV/0!	#DIV/0!	#DIV/0!	-0.946559	-0.971462	-0.998441	-0.969041	-0.904374	-0.490832	-0.591591	-0.17436	-1.16632	-1.13127	-1.12748
		1.19761	1.0438	0.93499	0.839158	2.64171	2.99198	2.52674	2.9385	1.22172	1.42924	1.38914	1.29726	1.71304	1.69348	1.54493	1.50145	1.96467	1.89402	1.70541	1.62908	1.74568	1.87133	1.90014	1.13272	1.19885	1.06179	1.31328	1.36842	1.38346				CD27	#DIV/0!	#DIV/0!	#DIV/0!	#DIV/0!	-0.87112	-1.08046	-1.01184	-1.03916	#DIV/0!	#DIV/0!	#DIV/0!	#DIV/0!	-0.55806	-0.440833	-0.0231648
		1.04964	1.0266	1.19084	0.97685	1.85561	1.67647	2.27005	2.03209	0.887288	0.907923	0.92739	0.882227	1.25217	1.41812	1.30507	1.25435	1.53561	1.49858	1.37322	1.1177	1.15748	1.20412	1.12922	1.07285	1.14234	0.971628	0.922306	0.907268	0.972431				ICOS	#DIV/0!	#DIV/0!	#DIV/0!	#DIV/0!	#DIV/0!	#DIV/0!	#DIV/0!	#DIV/0!	-0.976289	-0.541729	-0.458127	0.241031	#DIV/0!	#DIV/0!	#DIV/0!
		1.1741	1.00415	0.995854	0.945268	1.16845	0.959893	1.04011	0.959893	0.902862	1.01187	1.00759	0.992408	1.0087	1.01232	0.913768	0.991304	1	1	0.957835	1.00905	1.02579	0.990947	0.959396	0.977639	1.10002	1	1	1.03008	0.937343				CD127	#DIV/0!	#DIV/0!	#DIV/0!	#DIV/0!	#DIV/0!	#DIV/0!	#DIV/0!	#DIV/0!	-1.35575	-1.55074	-1.30222	-0.896927	#DIV/0!	#DIV/0!	#DIV/0!
CD44+					93730				12346.5				25802				12698.5			0.742				19.676			1.836			4.295		CD44+		CD103	#DIV/0!	#DIV/0!	#DIV/0!	#DIV/0!	#DIV/0!	#DIV/0!	#DIV/0!	#DIV/0!	#DIV/0!	#DIV/0!	#DIV/0!	#DIV/0!	-1.35803	-1.3691	-1.36541
	1%O2	213492	202719	167633	154735	19438	23427	22824	22932	54881	56919	51024	59179	23096	23650	24919	22608	0.962	1.024	1.051	14.686	37.801	40.638	37.984	3.64	3.969	3.125	6.837	8.039	8.248	1%O2			CD18	#DIV/0!	#DIV/0!	#DIV/0!	#DIV/0!	#DIV/0!	#DIV/0!	#DIV/0!	#DIV/0!	#DIV/0!	#DIV/0!	#DIV/0!	#DIV/0!	-1.27908	-1.59743	-1.16308
	5%O2	107509	96982	124650	109208	14926	16730	13989	16652	28683	24978	23206	30597	12438	14349	16192	14961	0.943	1	1.024	17.408	26.259	28.478	24.801	2.35	2.6	2.261	4.834	4.415	5.137	5%O2			CD49d	#DIV/0!	#DIV/0!	#DIV/0!	#DIV/0!	#DIV/0!	#DIV/0!	#DIV/0!	#DIV/0!	#DIV/0!	#DIV/0!	#DIV/0!	#DIV/0!	-1.22832	-1.43714	-1.50396
	21%O2	94894	92280	127441	92566	11171	12757	11936	13419	24978	26447	25157	29517	12611	12786	11800	13357	0.712	0.742	0.764	15.563	19.12	20.232	22.237	1.836	2.026	1.764	3.669	4.295	4.402	21%O2			GZMB	#DIV/0!	#DIV/0!	#DIV/0!	#DIV/0!	-0.694439	-0.714181	-0.792224	-0.719425	#DIV/0!	#DIV/0!	#DIV/0!	#DIV/0!	-0.655899	-0.544134	-0.47795
		2.27773	2.1628	1.78847	1.65086	1.57437	1.89746	1.84862	1.85737	2.12701	2.20599	1.97752	2.29358	1.8188	1.86242	1.96236	1.78037	1.2965	1.38005	1.41644	0.746392	1.92117	2.06536	1.93047	1.98257	2.16176	1.70207	1.59185	1.87171	1.92037				GzmC	#DIV/0!	#DIV/0!	#DIV/0!	#DIV/0!	#DIV/0!	#DIV/0!	#DIV/0!	#DIV/0!	#DIV/0!	#DIV/0!	#DIV/0!	#DIV/0!	#DIV/0!	#DIV/0!	#DIV/0!
		1.14701	1.0347	1.32988	1.16513	1.20893	1.35504	1.13303	1.34872	1.11166	0.968064	0.899388	1.18584	0.979486	1.12998	1.27511	1.17817	1.27089	1.34771	1.38005	0.884733	1.33457	1.44735	1.26047	1.27996	1.41612	1.23148	1.12549	1.02794	1.19604				IFNg+	#DIV/0!	#DIV/0!	#DIV/0!	#DIV/0!	-0.868528	-1.11448	-1.39503	-0.110167	#DIV/0!	#DIV/0!	#DIV/0!	#DIV/0!	-1.00163	-0.932052	-1.1949
		1.01242	0.98453	1.35966	0.987581	0.904791	1.03325	0.966752	1.08687	0.968064	1.025	0.975002	1.14398	0.993109	1.00689	0.929244	1.05186	0.959569	1	1.02965	0.790964	0.971742	1.02826	1.13016	1	1.10349	0.960784	0.854249	1	1.02491				EOMES	-0.443914	-0.645247	-0.649608	-0.640886	-0.626182	-0.75906	-0.64864	-0.774032	#DIV/0!	#DIV/0!	#DIV/0!	#DIV/0!	-1.222	-1.30109	-0.896131
CD62L+													18805				5996			7.546				8.976			8.53			2.421		CD62L+		TBET	#DIV/0!	#DIV/0!	#DIV/0!	#DIV/0!	-0.790834	-0.498769	-1.23105	-0.977079	#DIV/0!	#DIV/0!	#DIV/0!	#DIV/0!	-1.22955	-1.41171	-1.12446
	1%O2									9074	13606	19807	10318	5114	5147	5497	5291	7.512	8.299	6.836	12.41	7.731	8.6	8.716	8.408	8.738	8.822	2.475	2.819	2.803	1%O2			TOX	-0.143218	-0.884239	0.0411678	-0.905112	#DIV/0!	#DIV/0!	#DIV/0!	#DIV/0!	#DIV/0!	#DIV/0!	#DIV/0!	#DIV/0!	#DIV/0!	#DIV/0!	#DIV/0!
	5%O2									15348	18589	21360	16382	4518	5370	5029	5404	6.645	7.018	6.502	11.429	9.599	10.412	9.47	9.103	8.208	8.759	2.323	2.382	2.475	5%O2			PD-1	-0.634322	-0.699836	-0.6701	-0.632891	#DIV/0!	#DIV/0!	#DIV/0!	#DIV/0!	#DIV/0!	#DIV/0!	#DIV/0!	#DIV/0!	#DIV/0!	#DIV/0!	#DIV/0!
	21%O2									19622	17988	21310	13388	5938	5750	6054	6559	7.397	8.171	7.546	10.064	9.197	8.62	8.755	9.015	8.267	8.53	2.33	2.524	2.421	21%O2			CTLA4	0.691001	-0.451533	-0.276002	-0.00298919	#DIV/0!	#DIV/0!	#DIV/0!	#DIV/0!	#DIV/0!	#DIV/0!	#DIV/0!	#DIV/0!	#DIV/0!	#DIV/0!	#DIV/0!
										0.482531	0.723531	1.05328	0.548684	0.852902	0.858406	0.916778	0.882422	0.995494	1.09979	0.90591	1.38258	0.861297	0.958111	0.971034	0.985698	1.02438	1.03423	1.0223	1.16439	1.15779				TIM3	-0.453005	-0.730013	-0.569978	-0.709447	#DIV/0!	#DIV/0!	#DIV/0!	#DIV/0!	#DIV/0!	#DIV/0!	#DIV/0!	#DIV/0!	#DIV/0!	#DIV/0!	#DIV/0!
										0.816166	0.988514	1.13587	0.871151	0.753502	0.895597	0.838726	0.901268	0.880599	0.930029	0.861649	1.27328	1.06941	1.15998	1.05504	1.06717	0.962251	1.02685	0.959521	0.983891	1.0223				LAG3	-0.409194	-0.864283	-0.528039	-0.881675	#DIV/0!	#DIV/0!	#DIV/0!	#DIV/0!	#DIV/0!	#DIV/0!	#DIV/0!	#DIV/0!	#DIV/0!	#DIV/0!	#DIV/0!
										1.04345	0.956554	1.13321	0.711938	0.990327	0.958973	1.00967	1.0939	0.980254	1.08283	1	1.12121	1.02462	0.960339	0.975379	1.05686	0.969168	1	0.962412	1.04254	1				BCL2	#DIV/0!	#DIV/0!	#DIV/0!	#DIV/0!	#DIV/0!	#DIV/0!	#DIV/0!	#DIV/0!	#DIV/0!	#DIV/0!	#DIV/0!	#DIV/0!	-1.20495	-1.42736	-1.36171
CD25									1233.5				17121				4556			0.663				0.8055			0.789					CD25		CD95	#DIV/0!	#DIV/0!	#DIV/0!	#DIV/0!	#DIV/0!	#DIV/0!	#DIV/0!	#DIV/0!	#DIV/0!	#DIV/0!	#DIV/0!	#DIV/0!	#DIV/0!	#DIV/0!	#DIV/0!
	1%O2					6777	10388	5640	7921	38444	58321	43694	80288	23538	29517	35850	20569	1.677	1.295	2.244	1.008	4.049	5.257	4.057	3.182	3.839	2.168				1%O2			CD73	#DIV/0!	#DIV/0!	#DIV/0!	#DIV/0!	#DIV/0!	#DIV/0!	#DIV/0!	#DIV/0!	#DIV/0!	#DIV/0!	#DIV/0!	#DIV/0!	#DIV/0!	#DIV/0!	#DIV/0!
	5%O2					2771	3058	3234	3754	12018	10271	10554	22395	16847	19484	13235	13828	3.022	2.65	3.406	0.685	1.928	2.702	1.355	1.751	2.152	1.585				5%O2
	21%O2					1302	1230	1152	1237	9343	18200	16042	24978	4185	4537	4575	4623	0.7	0.663	0.524	0.426	0.51	1.101	1.154	0.779	0.946	0.789				21%O2
						5.49412	8.42156	4.57236	6.42156	2.24543	3.4064	2.55207	4.68945	5.16637	6.47871	7.86874	4.51471	2.52941	1.95324	3.38462	1.2514	5.02669	6.52638	5.03662	4.03295	4.86565	2.74778
						2.24645	2.47912	2.62181	3.04337	0.701945	0.599907	0.616436	1.30804	3.69776	4.27656	2.90496	3.03512	4.55807	3.99698	5.13725	0.850403	2.39354	3.35444	1.68218	2.21926	2.7275	2.00887							MFI	21%O2
						1.05553	0.997163	0.933928	1.00284	0.545704	1.06302	0.936978	1.45891	0.918569	0.99583	1.00417	1.01471	1.05581	1	0.790347	0.528864	0.633147	1.36685	1.43265	0.987326	1.19899	1							CD62L+									19622	17988	21310	13388	5938	5750	6054
GZMB									1826.5								8004			8.448				7.315			2.604			1.22		GZMB		CD44+	94894	92280	127441	92566	11171	12757	11936	13419	24978	26447	25157	29517	12611	12786	11800
	1%O2					8430	9951	6545	9449					10602	17737	25038	21110	9.62	10.179	11.639	3.064	20.813	15.491	11.693	5.381	4.585	3.934	2.275	3.214	3.352	1%O2			CD8	37809	32336	32069	30440	437	359	389	359	2319	2599	2588	2549	1392	1397	1261
	5%O2					2301	2599	1767	1627					5912	7939	6308	6703	10.772	11.481	10.133	4.193	9.449	12.964	9.115	3.831	4.425	3.754	1.68	1.683	2.08	5%O2			CD25					1302	1230	1152	1237	9343	18200	16042	24978	4185	4537	4575
	21%O2					1899	1835	1582	1818					7111	7800	8208	9385	8.448	10.412	8.099	3.393	6.349	8.581	8.281	2.599	3.052	2.604	1.032	1.22	1.34	21%O2			CD27					2132	1473	1689	1603					10435	10602	11197
						4.61538	5.44812	3.58336	5.17328					1.32459	2.21602	3.12819	2.63743	1.13873	1.2049	1.37772	0.418865	2.84525	2.1177	1.5985	2.06644	1.76075	1.51075	1.86475	2.63443	2.74754				ICOS									8581	10156	10459	12993
						1.25979	1.42294	0.967424	0.890775					0.738631	0.991879	0.788106	0.837456	1.27509	1.35902	1.19946	0.573206	1.29173	1.77225	1.24607	1.4712	1.69931	1.44163	1.37705	1.37951	1.70492				CD127									579	528	593	699
						1.03969	1.00465	0.866137	0.995346					0.888431	0.974513	1.02549	1.17254	1	1.23248	0.958688	0.463841	0.867943	1.17307	1.13206	0.99808	1.17204	1	0.845902	1	1.09836				CD103													846	840	842
CD27									1646								10518.5			7.646				8.2045			11.639			11.377		CD27		CD18													26196	23932	27021
	1%O2					8600	8081	9751	9974					13357	11248	13388	13956	12.815	11.746	11.854	11.325	12.438	12.727	13.204	14.686	14.618	14.349	13.701	14.995	14.316	1%O2			CD49d													1353	1278	1254
	5%O2					4211	3490	3991	3497					9599	10156	10459	9951	8.62	8.135	8.716	6.616	8.524	9.28	8.117	15.856	16.497	14.119	13.235	13.892	14.383	5%O2			GZMB					1899	1835	1582	1818					7111	7800	8208
	21%O2					2132	1473	1689	1603					10435	10602	11197	10412	7.974	7.546	7.646	7.018	7.904	8.562	8.505	11.639	13.638	11.507	10.11	11.377	11.963	21%O2			GzmC
						5.22479	4.90948	5.92406	6.05954					1.26986	1.06935	1.27281	1.32681	1.67604	1.53623	1.55035	1.38034	1.516	1.55122	1.60936	1.26179	1.25595	1.23284	1.20427	1.31801	1.25833				IFNg+					3619	3427	3208	4211					3634	3769	3259
						2.55832	2.12029	2.42467	2.12454					0.912583	0.965537	0.994343	0.946047	1.12739	1.06396	1.13994	0.806387	1.03894	1.13109	0.989335	1.36232	1.41739	1.21308	1.16331	1.22106	1.26422				EOMES	2336	2059	2053	2065	1063	992	1051	984					1512	1462	1718
						1.29526	0.894897	1.02612	0.973876					0.992062	1.00794	1.06451	0.989875	1.0429	0.986921	1	0.855384	0.963374	1.04357	1.03663	1	1.17175	0.988659	0.888635	1	1.05151				TBET					868	937	764	824					703	677	718
TBET									846								705			0.703				1.0985			5.063			0.742		TBET		TOX	1302	1089	1355	1083
	1%O2					1170	1677	1049	1154					1012	966	1095	1044	0.946	1.006	1.038	1.097	1.702	1.579	1.699	6.514	6.28	5.83	0.653	0.824	0.805	1%O2			PD-1	1761	1349	1536	1770
	5%O2					1053	1270	908	984					817	910	992	901	0.931	0.986	1.01	0.946	1.074	1.199	1.112	5.506	6.061	5.292	0.728	0.779	0.844	5%O2			CTLA4	24580	17700	18757	20401
	21%O2					868	937	764	824					703	677	718	707	0.671	0.703	0.723	0.945	1.036	1.163	1.161	5.063	5.417	4.912	0.625	0.775	0.742	21%O2			TIM3	3005	2574	2823	2606
						1.38298	1.98227	1.23995	1.36407					1.43546	1.37021	1.55319	1.48085	1.34566	1.43101	1.47653	0.998635	1.54939	1.43741	1.54665	1.28659	1.24037	1.15149	0.880054	1.11051	1.08491				LAG3	418	261	377	255
						1.24468	1.50118	1.07329	1.16312					1.15887	1.29078	1.40709	1.27801	1.32432	1.40256	1.4367	0.861174	0.977697	1.09149	1.01229	1.0875	1.19712	1.04523	0.981132	1.04987	1.13747				BCL2													10110	9385	9599
						1.026	1.10757	0.903073	0.973995					0.997163	0.960284	1.01844	1.00284	0.954481	1	1.02845	0.860264	0.943104	1.05872	1.0569	1	1.06992	0.970176	0.842318	1.04447	1				CD95
IFNg+									3523								3701.5			12.553				3.999			13.732					IFNg+		CD73
	1%O2					5336	5336	4398	4841					5359	6645	5279	5799				4.872	4.682	4.219	3.942	15.563	15.967	13.924				1%O2
	5%O2													5324	10772	7301	5381	22.395	18.589	21.614											5%O2
	21%O2					3619	3427	3208	4211					3634	3769	3259	4407	12.438	15.636	12.553		4.219	3.999	3.983	11.963	13.732	16.966				21%O2
						1.51462	1.51462	1.24837	1.37411					1.44779	1.79522	1.42618	1.56666				1.2183	1.17079	1.05501	0.985746	1.13334	1.16276	1.01398
														1.43834	2.91017	1.97244	1.45373	1.78404	1.48084	1.72182
						1.02725	0.97275	0.910588	1.19529					0.981764	1.01824	0.880454	1.1906	0.990839	1.2456	1		1.05501	1	0.995999	0.871177	1	1.23551
ICOS													10307.5				#NUM!			1.373				1.817			2.877					ICOS
	1%O2									14250	15930	14686	20327					2.198	1.825	2.21	1.363	4.211	3.476	3.739	5.103	5.604	4.281				1%O2
	5%O2									9884	7529	7852	12786					3.693	2.905	3.49	1.381	2.707	2.917	2.766	3.808	4.024	3.575				5%O2
	21%O2									8581	10156	10459	12993					1.462	1.373	1.263	1.016	1.964	1.67	2.275	2.66	3.332	2.877				21%O2
										1.38249	1.54548	1.42479	1.97206	#NUM!	#NUM!	#NUM!	#NUM!	1.60087	1.32921	1.60961	0.750138	2.31756	1.91304	2.05779	1.77372	1.94786	1.48801
										0.958913	0.730439	0.761775	1.24046	#NUM!	#NUM!	#NUM!	#NUM!	2.68973	2.1158	2.54188	0.760044	1.48982	1.60539	1.52229	1.3236	1.39868	1.24261
										0.832501	0.985302	1.0147	1.26054	#NUM!	#NUM!	#NUM!	#NUM!	1.06482	1	0.919883	0.559163	1.0809	0.919097	1.25206	0.924574	1.15815	1
EOMES					2062				1021.5								1562			0.753				0.588								EOMES
	1%O2	4743	4893	5102	4775	2227	1689	2337	2198					2718	2739	3448	2888	1.089	1.014	1.046	0.877	0.945	0.933	0.978							1%O2
	5%O2	1925	1761	1882	1767	1154	1266	920	890					1942	2164	2992	2219	0.946	0.906	0.893	0.757	0.674	0.801	0.715							5%O2
	21%O2	2336	2059	2053	2065	1063	992	1051	984					1512	1462	1718	1612	0.753	0.798	0.71		0.61	0.58	0.588							21%O2
		2.30019	2.37294	2.4743	2.31571	2.18013	1.65345	2.28781	2.15174					1.74008	1.75352	2.20743	1.84891	1.44622	1.34661	1.38911	1.4915	1.60714	1.58673	1.66327
		0.93356	0.854025	0.912706	0.856935	1.12971	1.23935	0.900636	0.871268					1.24328	1.3854	1.91549	1.42061	1.25631	1.20319	1.18592	1.28741	1.14626	1.36224	1.21599
		1.13288	0.998545	0.995635	1.00145	1.04063	0.971121	1.02888	0.963289					0.96799	0.93598	1.09987	1.03201	1	1.05976	0.942895		1.03741	0.986395	1
CD73																				0.753				0.1325			0.392					CD73
	1%O2																	1.089	1.014	1.046	0.217	0.244	0.249	0.283	0.638	0.673	0.624				1%O2
	5%O2																	0.946	0.906	0.893	0.149	0.156	0.17	0.173	0.464	0.487	0.451				5%O2
	21%O2																	0.753	0.798	0.71	0.125	0.127	0.139	0.138	0.373	0.43	0.392				21%O2
																		1.44622	1.34661	1.38911	1.63774	1.84151	1.87925	2.13585	1.62755	1.71684	1.59184
																		1.25631	1.20319	1.18592	1.12453	1.17736	1.28302	1.30566	1.18367	1.24235	1.15051
																		1	1.05976	0.942895	0.943396	0.958491	1.04906	1.04151	0.951531	1.09694	1
CD95																					FITC			0.702			3.17					CD95
	1%O2																				0.98	1.119	1.127	1.278	4.159	4.407	3.739				1%O2
	5%O2																				0.75	0.738	0.796	0.8	3.448	3.785	3.332				5%O2
	21%O2																				0.705	0.689	0.699	0.735	2.934	3.604	3.17				21%O2
																					1.39601	1.59402	1.60541	1.82051	1.31199	1.39022	1.1795
																					1.06838	1.05128	1.1339	1.1396	1.0877	1.19401	1.0511
																					1.00427	0.981481	0.995726	1.04701	0.925552	1.13691	1
CTLA4					19579																						4.633					CTLA4
	1%O2	29648	31256	25870	20964																				5.007	5.874	4.185				1%O2
	5%O2	14237	12862	16205	12548																				6.516	6.16	6.253				5%O2
	21%O2	24580	17700	18757	20401																				4.633	4.751	4.254				21%O2
		1.51428	1.5964	1.32131	1.07074																				1.08073	1.26786	0.903302
		0.727157	0.656928	0.827673	0.640891																				1.40643	1.32959	1.34967
		1.25543	0.90403	0.958016	1.04198																				1	1.02547	0.918196
PD-1					1648.5																											PD-1
	1%O2	18159	15754	13785	9214																										1%O2
	5%O2	1474	1322	1492	1385																										5%O2
	21%O2	1761	1349	1536	1770																										21%O2
		11.0155	9.55657	8.36215	5.58932
		0.894146	0.801941	0.905065	0.840158
		1.06824	0.81832	0.931756	1.0737
CD127													586																			CD127
	1%O2									1197	1040	1095	1335																		1%O2
	5%O2									1132	866	996	1143																		5%O2
	21%O2									579	528	593	699																		21%O2
										2.04266	1.77474	1.8686	2.27816
										1.93174	1.47782	1.69966	1.95051
										0.988055	0.901024	1.01195	1.19283
TCRb																																TCRb
	1%O2																														1%O2
	5%O2																														5%O2
	21%O2																														21%O2
TIM3					2714.5																											TIM3
	1%O2	6231	5908	6018	5368																										1%O2
	5%O2	2530	2274	2720	2461																										5%O2
	21%O2	3005	2574	2823	2606																										21%O2
		2.29545	2.17646	2.21698	1.97753
		0.932032	0.837723	1.00203	0.906613
		1.10702	0.948241	1.03997	0.960029
GzmC																		FITC		0.753667												GzmC
	1%O2																	1.089	1.014	1.046											1%O2
	5%O2																	0.946	0.906	0.893											5%O2
	21%O2																	0.753	0.798	0.71											21%O2
																		1.44494	1.34542	1.38788
																		1.2552	1.20212	1.18487
																		0.999115	1.05882	0.942061
LAG3					319																											LAG3
	1%O2	1248	1048	984	826																										1%O2
	5%O2	313	267	371	342																										5%O2
	21%O2	418	261	377	255																										21%O2
		3.91223	3.28527	3.08464	2.58934
		0.981191	0.836991	1.16301	1.0721
		1.31034	0.818182	1.18182	0.799373
TOX					1195.5																											TOX
	1%O2	1617	1677	1937	1593																										1%O2
	5%O2	1184	937	1231	1113																										5%O2
	21%O2	1302	1089	1355	1083																										21%O2
		1.35257	1.40276	1.62024	1.3325
		0.990381	0.783772	1.02969	0.930991
		1.08908	0.910916	1.13342	0.905897
CD103														APC			841															CD103
	1%O2													2048	2044	2048	1983														1%O2
	5%O2													1867	2115	1913	1630														5%O2
	21%O2													846	840	842	808														21%O2
														2.4352	2.43044	2.4352	2.35791
														2.21998	2.51486	2.27467	1.93817
														1.00595	0.998811	1.00119	0.960761
CD18														PE			26072															CD18
	1%O2													35850	39383	36901	42547														1%O2
	5%O2													37984	43064	42547	42138														5%O2
	21%O2													26196	23932	27021	25948														21%O2
														1.37504	1.51055	1.41535	1.6319
														1.45689	1.65173	1.6319	1.61622
														1.00476	0.91792	1.0364	0.995244
CD49d														PERCEPCY5.5			1311.5															CD49d
	1%O2													2091	2021	1839	2152														1%O2
	5%O2													2033	2257	1983	1924														5%O2
	21%O2													1353	1278	1254	1345														21%O2
														1.59436	1.54098	1.40221	1.64087
														1.55013	1.72093	1.51201	1.46702
														1.03164	0.974457	0.956157	1.02554
BCL2														af488			9854.5															BCL2
	1%O2													17165	17946	19120	16192														1%O2
	5%O2													13796	15384	13544	15491														5%O2
	21%O2													10110	9385	9599	10723														21%O2
														1.74184	1.8211	1.94023	1.64311
														1.39997	1.56111	1.3744	1.57197
														1.02593	0.952357	0.974073	1.08813
																															#REF!	#REF!
																																		#REF!	#REF!	#REF!	#REF!	#REF!	#REF!	#REF!	#REF!	#REF!	#REF!	#REF!	#REF!	#REF!	#REF!	#REF!	#REF!
[truncated: 78 more columns]

## Sheet: Fig 1B
	21%O2				5%O2				1%O2					non linear fit
hours after activation	PC001c	PC001d	PC001d	PC001d	PC001c	PC001d	PC001d	PC001d	PC001c	PC001d	PC001d	PC001d			21%O2	5%O2	1%O2
4	0.211	0.262	0.297	0.316	0.195	0.276	0.25	0.233	0.2285	0.257	0.29	0.274		Exponential growth equation
12	0.1985	0.299	0.257	0.241	0.19	0.332	0.313	0.257	0.1975	0.244	0.112	0.257		Best-fit values
24	0.2155	0.19	0.133	0.23	0.212	0.213	0.284	0.236	0.178	0.151	0.217	0.248		Y0	0.1882	0.2025	0.2219
48	0.9995	0.703	0.94715	0.9462	0.6205	0.7524	0.6714	0.8541	0.2525	0.324	0.48525	0.54825		k	0.02777	0.02151	0.005787
72	2.165	1.152	1.143	0.981	1.049	0.6885	0.867	0.85	0.3355	0.291	0.285	0.2205		Tau	36.01	46.5	172.8
														Doubling Time	24.96	32.23	119.8
														95% CI (profile likelihood)
														Y0	0.1603 to 0.2900	0.1761 to 0.2698	0.1833 to 0.3334
														k	0.02196 to 0.03404	0.01681 to 0.02655	0.0001761 to 0.01401
														Tau	29.38 to 45.55	37.67 to 59.50	71.38 to 5680
														Doubling Time	20.36 to 31.57	26.11 to 41.24	49.47 to 3937
														Goodness of Fit
														Degrees of Freedom	18	18	18
														R squared (weighted)	0.6399	0.7404	0.1556
														Weighted Sum of Squares (1/Y²)	2.346	1.186	2.115
														Sy.x	0.361	0.2566	0.3427
														Number of points
														# of X values	20	20	20
														# Y values analyzed	20	20	20

## Sheet: Fig 1C
																						PC052 Nuclear		LMNB1	HIF	norm
																						10 ug
																						0.21	Naive	201000	707000	3.51741
																							4h	131000	1070000	8.16794
																							8h	179000	1180000	6.59218
																							12h	128000	1320000	10.3125
																							24h	401000	1700000	4.2394
																							48h	204000	1930000	9.46078
																							72h	417000	1170000	2.80576
																						0.05	Naive	239000	745000	3.11715
																							4h	81400	1180000	14.4963
																							8h	159000	1590000	10
																							12h	79300	1560000	19.6721
																							24h	298000	1590000	5.33557
																							48h	228000	1180000	5.17544
																							72h	193000	823000	4.26425
																						0.01	Naive	187000	454000	2.42781
																							4h	129000	1010000	7.82946
																							8h	138000	1410000	10.2174
																							12h	61700	1440000	23.3387
																							24h	253000	1340000	5.29644
																							48h	80000	887000	11.0875
																							72h	144000	1020000	7.08333
		Additional info:									relevant bands used in Fig 1C				Full western blot membranes provided in this zip folder
		Protein ladder: PageRuler 10-180kDa (Thermo)
		Running buffer: MOPS
		Cut membrane: at 85kDa and 40kDa before incubation with primary and secondary antibodies
		Method of detection: fluorescence with LICOR

## Sheet: Fig 1E
																			Nuclear	HIF1	HDAC1	HIF norm	reltive to 21%
																		n=1	PC076 n1 21%	986716	2505072	0.393887	1
																			PC076 n1 5%	1306211	2711192	0.481785	1.22315
																			PC076 n1 1%	1484884	2642388	0.561948	1.42667
																			PC076 n1 FG	11183842	2605743	4.292	10.8965
																				HIF1	Histone3	HIF norm
																		n=2	PC055 n2 21%	86500	2790000	0.0310036	1
																			PC055 n2 5%	225000	2660000	0.0845865	2.72828
																			PC055 n2 1%	627000	3390000	0.184956	5.96562
																			PC055 n2 FG	1700000	2740000	0.620438	20.0118
																				HIF1	Histone3	HIF norm
																		n=3	PC055 n2 21%	631000	3390000	0.186136	1
																			PC055 n2 5%	587000	2920000	0.201027	1.08
																			PC055 n2 1%	848000	3330000	0.254655	1.36811
																			PC055 n2 FG	2520000	3170000	0.794953	4.27082
																		Dunnett's multiple comparisons test	Mean Diff.	95.00% CI of diff.	Below threshold?	Summary	Adjusted P Value
																		21% vs. 5%	-0.6884	-9.751 to 8.374	No	ns	0.9902
																		21% vs. 1%	-2.019	-11.08 to 7.044	No	ns	0.832
																		21% vs. FG-4592	-10.53	-19.59 to -1.468	Yes	*	0.0273
																	relevant bands used in Fig 1E
																	Additional info (n=1):
																	Protein ladder: Precision Plus Protein™ Dual Color Standards (Biorad)
																	Running buffer: MOPS
																	Cut membrane: at 75kd and 37kDa before incubation with primary and secondary antibodies
																	Method od detection: ECL
																	Additional info (n=2-3):
																	Protein ladder: PageRuler 10-180kDa
																	Running buffer: MOPS
																	Cut membrane: at 80kd and 40kDa before incubation with primary and secondary antibodies
																	Method of detection: fluorescence with LICOR
																	Full western blot membranes provided in this zip folder

## Sheet: Fig 1F
	Cell number (million cells per mL at 3 days after activation						Division index						Percentage of GZMB+ cells						Percentage of IFNg+ cells
		21%O2	5%O2	1%O2	FG-4592			21%O2	5%O2	1%O2	FG-4562			21%O2	5%O2	1%O2	FG-4562			21%O2	5%O2	1%O2	FG-4562
	PC069a	3.13	1.57		1.82		PC069a	2.4	3.4		1.9		PC069a	66.1	55.3	68	77.1		PC069b	26.915	75.4	56.5	48.2
		2.08	1.34		1.67			2.5	3.3		1.9			58.1	44.8	68.5	66.5
	PC069b	3.065	2.41	0.502	2.44														PC069c	48.9	80.4	72.3	75.2
	PC070a	4.35	2.95		2.73		PC069b	3.145	3.58	1.3	2.73		PC069b	52.2	62.8	83.7	64			44.6	83.4	74.9	77.1
		3.57	2.23		3.23
		3.07	2.17		2.23		PC069c	2.24	2.59	1.36	1.58		PC069c	33.4	55.2	87.4	74.6		PC069d	44.1	51.2	78.5	70.5
	PC069d	3.78	3.42	0.87	3.3			2.51	2.92	1.58	1.84			27.1	47.6	82.6	60.7			36.3	57.4	66	68.7
		4.59	3.15	0.618	3.84
	PC069e	3.15		0.38	2.08		PC069d	3.1	2.87	1.27	3.04		PC069d	78.6	93.8	95.8	88
		2.34		0.49	1.9			2.6	2.06	1.03	1.94			84.4	93.3	93.6	90.3
		2.64		0.16	2.21
														20.2		82.9	33.9
														20		85	36.2
														22		80.9	42
	Shapiro-Wilk test						Shapiro-Wilk test						Shapiro-Wilk test						Shapiro-Wilk test
	W	0.9582	0.9551	0.979	0.9192		W	0.8644	0.9518	0.9646	0.8181		W	0.8857	0.8148	0.9088	0.9254		W	0.9143	0.8772	0.9401	0.8093
	P value	0.7496	0.7628	0.9467	0.312		P value	0.1656	0.746	0.8398	0.0616		P value	0.1517	0.0573	0.2729	0.4041		P value	0.4937	0.297	0.6668	0.0962
	Passed normality test (alpha=0.05)?	Yes	Yes	Yes	Yes		Passed normality test (alpha=0.05)?	Yes	Yes	Yes	Yes		Passed normality test (alpha=0.05)?	Yes	Yes	Yes	Yes		Passed normality test (alpha=0.05)?	Yes	Yes	Yes	Yes
	P value summary	ns	ns	ns	ns		P value summary	ns	ns	ns	ns		P value summary	ns	ns	ns	ns		P value summary	ns	ns	ns	ns
	Holm-Šídák's multiple comparisons test	Mean Diff.	Below threshold?	Summary	Adjusted P Value		Holm-Šídák's multiple comparisons test	Mean Diff.	Below threshold?	Summary	Adjusted P Value		Holm-Šídák's multiple comparisons test	Mean Diff.	Below threshold?	Summary	Adjusted P Value		Holm-Šídák's multiple comparisons test	Mean Diff.	Below threshold?	Summary	Adjusted P Value
	21%O2 vs. 5%O2	0.8464	Yes	**	0.001		21%O2 vs. 5%O2	-0.3179	No	ns	0.17		21%O2 vs. 5%O2	-18.48	Yes	*	0.0284		21%O2 vs. 5%O2	-29.4	Yes	*	0.0147
	21%O2 vs. 1%O2	2.748	Yes	***	<.001		21%O2 vs. 1%O2	1.334	Yes	**	0.005		21%O2 vs. 1%O2	-36.63	Yes	**	0.0034		21%O2 vs. 1%O2	-29.48	Yes	***	0.0002
	21%O2 vs. FG-4592	0.7559	Yes	***	<.001		21%O2 vs. FG-4562	0.5093	Yes	**	0.003		21%O2 vs. FG-4562	-17.12	Yes	**	0.0034		21%O2 vs. FG-4562	-27.78	Yes	***	0.0004
	Column D	FG-4592					Column D	FG-4562					Column D	FG-4562					Column D	FG-4562
	vs.	vs.					vs.	vs.					vs.	vs.					vs.	vs.
	Column C	1%O2					Column C	1%O2					Column C	1%O2					Column C	1%O2
	Paired t test						Paired t test						Paired t test						Paired t test
	P value	0.0004					P value	0.0411					P value	0.0138					P value	0.5541
	P value summary	***					P value summary	*					P value summary	*					P value summary	ns
	Significantly different (P < 0.05)?	Yes					Significantly different (P < 0.05)?	Yes					Significantly different (P < 0.05)?	Yes					Significantly different (P < 0.05)?	No
	One- or two-tailed P value?	Two-tailed					One- or two-tailed P value?	Two-tailed					One- or two-tailed P value?	Two-tailed					One- or two-tailed P value?	Two-tailed

## Sheet: Fig 1H 
Data summary
21% cytotox	21%O2	5%O2	1%O2	FG-4562		5% cytotox	21%O2	5%O2	1%O2	FG-4562		1% cytotox	21%O2	5%O2	1%O2	FG-4562
[Agonist] vs. normalized response						[Agonist] vs. normalized response						[Agonist] vs. normalized response
Best-fit values						Best-fit values						Best-fit values
EC50	58736	13135	7476	20191		EC50	22180	9420	5137	12131		EC50	3.958	2.589	0.5097	1.688	x10000
logEC50	4.769	4.118	3.874	4.305		logEC50	4.346	3.974	3.711	4.084		logEC50	0.5974	0.4131	-0.2927	0.2273
95% CI (profile likelihood)						95% CI (profile likelihood)						95% CI (profile likelihood)
EC50	45196 to 76466	10117 to 17052	6262 to 8920	16418 to 24817		EC50	16651 to 29616	7066 to 12545	4097 to 6434	10174 to 14464		EC50	2.935 to 5.336	2.053 to 3.254	0.4223 to 0.6140	1.461 to 1.948	x10000
logEC50	4.655 to 4.883	4.005 to 4.232	3.797 to 3.950	4.215 to 4.395		logEC50	4.221 to 4.472	3.849 to 4.098	3.612 to 3.808	4.007 to 4.160		logEC50	0.4676 to 0.7272	0.3124 to 0.5124	-0.3744 to -0.2118	0.1646 to 0.2896
Goodness of Fit						Goodness of Fit						Goodness of Fit
Degrees of Freedom	56	42	54	55		Degrees of Freedom	56	54	53	54		Degrees of Freedom	45	40	43	29
R squared	0.8637	0.8938	0.9333	0.9032		R squared	0.8572	0.8411	0.8971	0.9336		R squared	0.8537	0.9156	0.9368	0.9707
Sum of Squares	11389	6370	5032	6404		Sum of Squares	12937	11393	7542	4683		Sum of Squares	8665	4284	3113	974.1
Sy.x	14.26	12.32	9.653	10.79		Sy.x	15.2	14.53	11.93	9.313		Sy.x	13.88	10.35	8.508	5.796
Constraints						Constraints						Constraints
EC50	EC50 > 0	EC50 > 0	EC50 > 0	EC50 > 0		EC50	EC50 > 0	EC50 > 0	EC50 > 0	EC50 > 0		EC50	EC50 > 0	EC50 > 0	EC50 > 0	EC50 > 0
Number of points						Number of points						Number of points
# of X values	65	65	65	65		# of X values	65	65	65	65		# of X values	65	65	65	65
# Y values analyzed	57	43	55	56		# Y values analyzed	57	55	54	55		# Y values analyzed	46	44	44	34
												Outliers (excluded, Q=1%)	0	3	0	4
EC50						EC50						EC50
21% cytotox	21%O2	5%O2	1%O2	FG-4562		5% cytotox	21%O2	5%O2	1%O2	FG-4562		1% cytotox	21%O2	5%O2	1%O2	FG-4562
PC069b n1	18530	3542	1794	10799		PC069b n1	7404	1963	1865	7537		PC069b n1	10958	4311	3281	14824
PC069c	47572	9828	6405	27539		PC069c	19195	7410	10380	15713
PC069c n2	121989	21473	15963	32929		PC069c n2	24255	6567	3609	16613		PC069c n2	53690	29520	3609	63077
PC069d n3	55118	26201	6601	13213		PC069d n3	25805	25423	7300	13774		PC069d n3	33494	25428	6320	17793
						PC069d n4	60251	19698	3612	9756		PC069d n4	91702	45154	7098	14281
Shapiro-Wilk test						Shapiro-Wilk test						Shapiro-Wilk test
W	0.9004	0.943	0.9616	0.9432		W	0.865	0.9013	0.9071	0.9168		W	0.9829	0.9725	0.8584	0.683
P value	0.4122	0.6726	0.819	0.6887		P value	0.2467	0.4173	0.4503	0.5096		P value	0.9191	0.8569	0.2545	0.0072
Passed normality test (alpha=0.05)?	Yes	Yes	Yes	Yes		Passed normality test (alpha=0.05)?	Yes	Yes	Yes	Yes		Passed normality test (alpha=0.05)?	Yes	Yes	Yes	No
P value summary	ns	ns	ns	ns		P value summary	ns	ns	ns	ns		P value summary	ns	ns	ns	**
Dunn's multiple comparisons test	Rank sum diff.	Significant?	Summary	Adjusted P Value		Dunn's multiple comparisons test	Rank sum diff.	Significant?	Summary	Adjusted P Value		Dunn's multiple comparisons test	Rank sum diff.	Significant?	Summary	Adjusted P Value
21%O2 vs. 5%O2	7	No	ns	0.1657		21%O2 vs. 5%O2	8	No	ns	0.1501		21%O2 vs. 5%O2	4	No	ns	0.82
21%O2 vs. 1%O2	12	Yes	**	0.003		21%O2 vs. 1%O2	13	Yes	**	0.0044		21%O2 vs. 1%O2	10	Yes	*	0.0185
21%O2 vs. FG-4562	5	No	ns	0.5127		21%O2 vs. FG-4562	5	No	ns	0.662		21%O2 vs. FG-4592	2	No	ns	>0.9999
Raw values + normalization
	17:00:00	1	2	3	4	5	6	7	8	9	10	11	12
	A	zero	7671	7715	7766	7762	7697	7731	7752	7752	7756	7764	51	540/25,620/40	CT neg
	B	zero	7734	7733	7735	7761	7690	7689	7738	7724	7724	7738	51	540/25,620/40	7731.6
assay in 21% n=1		1	2	3	4	5	6	7	8	9	10	11	12			FG	21%	5%	1%	OT-I number
	A	13465	8132	7755	7824	7800	7897	8396	7768	7916	7723	7714	11941	540/25,620/40	13133	99.3261	96.5861	100.159	100.326	500000
	B	12198	8264	7925	7853	7864	7964	8343	7970	8202	7799	7809	11185	540/25,620/40	CT pos	95.5863	91.2911	98.7522	98.567	250000
	C	12734	8446	8123	7829	8036	7894	8672	8168	8466	7848	7792	13363	540/25,620/40		91.9206	86.4035	97.845	98.8818	125000
	D	13352	8937	8263	7889	8409	7820	8957	8561	8572	7945	7792	12808	540/25,620/40		84.6447	84.4411	96.0492	98.8818	62500
	E	11948	9219	8504	7935	8551	7828	10018	9178	9675	8393	7960	12832	540/25,620/40		73.2218	64.0204	87.755	95.7715	31250
	F	12336	10658	9525	8156	9276	7807	10155	9877	9926	8600	8242		540/25,620/40		60.2807	59.3735	83.9227	90.5506	15625
	G	13689	12083	10394	10055	11908	8693	13078	12190	11607	9484	8807	12759	540/25,620/40		17.4584	28.2519	67.5566	80.0903	7812.5
	H	13366	13406	12016	11786	13196	11129	13311	12426	13195	11334	10531	13903	540/25,620/40		13.0892	-1.14785	33.3062	48.1727	3906.25
assay in 5% n=1		1	2	3	4	5	6	7	8	9	10	11	12							OT-I number
	A	12712	7900	7826	7877	7769	7801	8017	7741	7848	7718	7748	9896	540/25,620/40	11895	99.7742	97.2042	100.327	99.6061	500000
	B	10476	8006	7737	7722	7732	7686	8019	7826	7893	7703	7758	10072	540/25,620/40	CT pos	97.7326	96.1234	100.687	99.3659	250000
	C	11121	8139	7850	7740	7827	7661	8132	7968	8107	7755	7705	11909	540/25,620/40		94.3219	90.9833	99.438	100.639	125000
	D	11724	8519	7999	7743	8108	7655	8277	8165	8275	7899	7876	12319	540/25,620/40		89.5902	86.9482	95.9792	96.5317	62500
	E	10491	8728	8369	7933	8392	7679	8352	8283	8311	8114	7905	11485	540/25,620/40		86.756	86.0835	90.8152	95.8351	31250
	F	12185	9179	8839	8148	8632	7773	8733	8623	8537	8415	8482	11434	540/25,620/40		78.5896	80.6552	83.5855	81.9763	15625
	G	13684	10649	8857	8635	9423	8086	10250	10121	10068	8483	8711	12328	540/25,620/40		42.6094	43.8824	81.9523	76.476	7812.5
	H	10964	10773	9360	9411	9939	8569	10117	10735	10542	9054	8835		540/25,620/40		27.8618	32.4975	68.2375	73.4976	3906.25
assay in 1% n=1		1	2	3	4	5	6	7	8	9	10	11	12			FG	21%	5%	1%	OT-I number
	A	12573	7966	7863	7847	7787	7763	8097	7798	7872	7815	7617	11749	540/25,620/40	11374.8	98.1774	96.1462	97.7108	103.146	500000
	B	11104	7939	7825	7780	7722	7748	8254	7813	7909	7761	7764	10011	540/25,620/40	CT pos	97.7657	95.1307	99.193	99.1107	250000
	C	11105	8437	7837	7821	7873	7678	8755	8331	8442	7739	7762	11376	540/25,620/40		83.5474	80.5007	99.7969	99.1656	125000
	D	12298	8984	8148	7808	8300	7671	8803	8351	8845	7829	7754	11282	540/25,620/40		82.9985	69.439	97.3265	99.3852	62500
	E	10310	8224	7554	7957	8475	7739	8854	8645	8922	8369	7893	11742	540/25,620/40		74.9286	67.3254	82.5044	95.5698	31250
	F	11201	9679	9188	8255	8811	7698	9269	9666	9275	8509	8355		540/25,620/40		46.9038	57.6361	78.6616	82.8887	15625
	G	10689	8879	8440	8701	9249	8524	10030	10009	9677	9040	8903	11341	540/25,620/40		37.489	46.6019	64.0865	67.8469	7812.5
	H	11456	10525	10449	9448	10064	8992	10500	10860	10843	9603	9426	11133	540/25,620/40		14.1304	14.5971	48.6331	53.4914	3906.25
	19 40
assay in 21% n=2	21 n1	500000	250000	125000	62500	31250	15625	7812.5	3906.25	1953.12	976.562	488.281	244.141	OT-I cell number		500000	250000	125000	62500	31250	15625	7812.5	3906.25	1953.12	976.562	488.281	244.141	21 n1
21%CT	1	17584	8949	12032	11028	13562	15076	17603	17627	17626	17373	18242	19095				83.5166	56.9147	65.5778	43.7131	30.6494	8.84505	8.63797	8.6466	10.8296	3.33141	-4.02875	1
FG	1 fg	17831	8766	10492	9888	13314	13731	17151	15649	15829	14636	17014	18047				85.0956	70.2027	75.4144	45.8529	42.2548	12.7452	25.7053	24.1521	34.446	13.9273	5.01398	1 fg
0.05	1 5%	7320	7784	8758	9414	10727	11482	13230	14573	15709	17627	16861	17776			97.5725	93.5688	85.1646	79.5043	68.175	61.6604	46.5777	34.9896	25.1875	8.63797	15.2474	7.35231	1 5%
0.01	1 1%	7199	7245	7680	8565	9331	9808	13145	13840	14941	18166	16692	16587	Pos CT	Neg CT	98.6166	98.2196	94.4662	86.8299	80.2205	76.1047	47.3112	41.3143	31.8143	3.98718	16.7057	17.6117	1 1%
CTs	0	19427	19608	19150	18624	18170	18157	19360	18693	18305	7021	7061	7034	18628.1	7038.67	-6.89343	-8.4552	-4.50332	0.0352986	3.95266	4.06483	-6.31532	-0.560072	2.78781	100.152	99.8073	100.04	0
														534.404	16.66
assay in 5% n=2	5 n1	500000	250000	125000	62500	31250	15625	7812.5	3906.25	1953.12	976.562	488.281	244.141	OT-I cell number		500000	250000	125000	62500	31250	15625	7812.5	3906.25	1953.12	976.562	488.281	244.141	5 n1
21%CT	1	11226	7500	8244	9112	8978	8933	12044	12417	14416	13448	16073	15346				90.485	78.8481	65.2716	67.3675	68.0714	19.412	13.5779	-17.6886	-2.54807	-43.6059	-32.2348	1
FG	1 fg	13600	15148	8462	8934	8338	9102	12097	12341	12971	12923	14430	14800					75.4383	68.0557	77.3778	65.428	18.583	14.7666	4.91272	5.66349	-17.9076	-23.6948	1 fg
0.05	1 5%	7011	7134	7444	7968	8427	8978	10058	9965	13075	12712	13772	14457			98.1335	96.2096	91.3609	83.165	75.9857	67.3675	50.4752	51.9298	3.28605	8.96376	-7.61578	-18.3299	1 5%
0.01	1 1%	11357	7073	7379	7787	8426	9336	10647	11321	12860	12955	15190	14655	Pos CT	Neg CT		97.1638	92.3776	85.996	76.0014	61.768	41.2626	30.7205	6.64888	5.16298	-29.7948	-21.4268	1 1%
CTs	0	12914			13923	12778	13653	14497	13116	13924	6885	6906	6884	13285.1	6891.67	5.80426			-9.97758	7.93144	-5.75449	-18.9556	2.64476	-9.99322	100.104	99.7758	100.12	0
														582.479	10.1434
assay in 21% n=3	21 n2	500000	250000	125000	62500	31250	15625	7812.5	3906.25	1953.12	976.562	488.281	244.141	OT-I cell number		500000	250000	125000	62500	31250	15625	7812.5	3906.25	1953.12	976.562	488.281	244.141	21 n2
21%CT	1	7979	9262	12432	13528	14861	15266	16566	16157	15457	17144	16632	17140			90.4086	76.4617	42.0023	30.0882	15.5978	11.1953	-2.93639	1.50964	9.11899	-9.21954	-3.65385	-9.17606	5
FG	1 fg	15887	8329	10771	10892	10634	12671	15998	14360	13803	16332	17027	17368				86.6039	60.0582	58.7428	61.5474	39.4042	3.23805	21.0439	27.0988	-0.392697	-7.94769	-11.6545	5 fg
0.05	1 5%	7373	8274	9929	10824	9864	11165	14569	14456	15650	15983	17156	17172			96.9961	87.2018	69.2111	59.482	69.9177	55.7752	18.772	20.0004	7.02098	3.40111	-9.34999	-9.52392	5 5%
0.01	1 1%	7226	7819	8672	9744	9771	10793	13767	15038	15077	15935	16990	16582	Pos CT	Neg CT	98.5941	92.1479	82.8753	71.2222	70.9287	59.819	27.4901	13.6737	13.2498	3.92289	-7.54549	-3.11032	5 1%
CTs	0	16385			16606	16615	16532	17879	14483	15980	7088	7104	7098	16295.9	7096.67	-0.968833			-3.37121	-3.46905	-2.5668	-17.2094	19.7069	3.43372	100.094	99.9203	99.9855	0
														935.827	6.59966
assay in 5% n=3	5 n2	500000	250000	125000	62500	31250	15625	7812.5	3906.25	1953.12	976.562	488.281	244.141	OT-I cell number		500000	250000	125000	62500	31250	15625	7812.5	3906.25	1953.12	976.562	488.281	244.141	5 n2
21%CT	1	7799	8594	10529	10556	11040	12048	14164	14323	16393	16126	17880	17689			91.854	83.7925	64.1712	63.8974	58.9895	48.7682	27.3114	25.6991	4.70887	7.41631	-10.3697	-8.43287	5
FG	1 fg	16435	8297	9653	10408	10791	11740	12878	13861	15819	15945	16787	16723				86.8042	73.054	65.3982	61.5144	51.8914	40.3518	30.3839	10.5294	9.25169	0.713619	1.36259	5 fg
0.05	1 5%	7484	7688	8259	8995	10002	10526	11350	12057	13945	15500	16408	16604			95.0482	92.9796	87.1895	79.7263	69.5151	64.2016	55.8461	48.6769	29.5322	13.7641	4.55677	2.56928	5 5%
0.01	1 1%	7353	7456	7795	8576	9809	10594	11051	12108	14954	14429	16993	16662	Pos CT	Neg CT	96.3766	95.3321	91.8946	83.9751	71.4722	63.5121	58.878	48.1598	19.3007	24.6243	-1.37527	1.98115	5 1%
CTs	0	16905			17116	16896	16939	16874	16931	16763	6972	7039	6976	16857.4	6995.67	-0.482928			-2.62252	-0.391666	-0.827696	-0.168581	-0.746575	0.956984	100.24	99.5606	100.199	0
														97.4147	30.6848
assay in 1% n=2	1 n2	500000	250000	125000	62500	31250	15625	7812.5	3906.25	1953.12	976.562	488.281	244.141	OT-I cell number		500000	250000	125000	62500	31250	15625	7812.5	3906.25	1953.12	976.562	488.281	244.141	1 n2
21%CT	1	7889	9530	10136	11310	12281	14004	15467	13326	14440	13567	15392	15791			89.5532	71.0134	64.1669	50.9032	39.933	20.4667	3.93794	28.1267	15.5409	25.4039	4.78528	0.277426	5
FG	1 fg	17643	9996	10574	11941	12011	13952	14500	14704	15183	14786	15762	16225				65.7486	59.2184	43.7742	42.9834	21.0542	14.863	12.5582	7.14653	11.6318	0.605064	-4.62585	5 fg
0.05	1 5%	7737	8803	10439	10831	11147	12042	13163	14042	15191	14959	15748	15807			91.2705	79.227	60.7437	56.3149	52.7448	42.6332	29.9682	20.0374	7.05615	9.67726	0.763234	0.0966596	5 5%
0.01	1 1%	7091	7408	8414	9133	8598	9126	11809	10750	11921	13602	13870	13579	Pos CT	Neg CT	98.5689	94.9875	83.6218	75.4987	81.543	75.5778	45.2656	57.23	44.0002	25.0085	21.9806	25.2683	5 1%
CTs	0	16289	16614	16061	15276		15670	15320	14559	14908	7004	6967	6922	15815.6	6964.33	-5.34892	-9.02073	-2.773	6.09583		1.64447	5.59872	14.1964	10.2534	99.5519	99.9699	100.478	0
														658.116	33.5294
assay in 21% n=4		500000	250000	125000	62500	31250	15625	7812.5	3906.25	1953.12	976.562	488.281	244.141	OT-I cell number		500000	250000	125000	62500	31250	15625	7812.5	3906.25	1953.12	976.562	488.281	244.141	21 n1
21%CT	1	7995	8670	9832	13040	12947	16989	18354	18970	19005	20596	20373	21135			95.9093	89.5324	78.5546	48.2475	49.1261	10.94	-1.9556	-7.77515	-8.10581	-23.1365	-21.0298	-28.2286	1
FG	1 fg	7793	7762	8143	9194	10521	12270	15057	15271	15243	17141	17604	17244			97.8177	98.1105	94.5111	84.582	72.0453	55.522	29.1923	27.1705	27.435	9.50402	5.1299	8.53094	1 fg
0.05	1 5	18755	8353	8696	9992	11904	14776	16192	16272	16465	17909	18825	18705			-5.74398	92.5272	89.2867	77.043	58.9797	31.847	18.4695	17.7137	15.8904	2.24846	-6.40529	-5.27161	1 5%
0.01	1 1	17824	7880	7777	7982	8712	10114	12562	13847	15727	17582	17889	16911	Pos CT	Neg CT	3.05149	96.9957	97.9688	96.0321	89.1356	75.8904	52.7633	40.6235	22.8625	5.33774	2.43741	11.6769	1 1%
CTs	100000	7834	7894	7895	8632	7715	17070	18155	18139	7600	7551	7536	7599	18147	7562	97.4303	96.8635	96.854	89.8914	98.5546	10.1748	-0.0755786	0.0755786	99.641	100.104	100.246	99.6504	0
		1	2	3	4	5	POS	POS	POS	NEG	NEG	NEG	NEG	4664.99	26.8701
assay in 21% n=5		1	2	3	4	5	6	7	8	9	10	11	12	OT-I cell number		500000	250000	125000	62500	31250	15625	7812.5	3906.25	1953.12	976.562	488.281	244.141	21 n2
21%CT	5	9603	10619	12696	15767	16345	16880	18270	18512	18645	19020	20090	21155			81.9071	72.9503	54.64	27.5669	22.4713	17.7549	5.50103	3.36762	2.19512	-1.11078	-10.5436	-19.9324	5
FG	5 FG	7757	8720	10350	11506	12604	13997	15623	15589	16254	17357	18019	18463			98.181	89.6914	75.3218	65.1308	55.4511	43.1707	28.8363	29.1361	23.2736	13.5498	7.71378	3.79959	5 fg
0.05	5 5	9308	10751	12499	18021	18478	20608	21516	22073	22013	22824	23599	23272															5 5%
0.01	5 1	7936	7992	7972	8580	10322	12584	13884	16136	16884	17145	18181	18109	Pos CT	Neg CT	96.603	96.1093	96.2856	90.9257	75.5686	55.6274	44.1669	24.3138	17.7197	15.4187	6.28563	6.92036	5 1%
CTs	H	8842	7916	8094	10744	7849	18778	19091	18697	7528	7559	7594	7499	18894	7550.67	88.6159	96.7793	95.2101	71.8484	97.37	1.02263	-1.7367	1.7367	100.2	99.9265	99.618	100.455	0
														4963.93	39.2287
assay in 5% n=4		1	2	3	4	5	6	7	8	9	10	11	12	OT-I cell number		500000	250000	125000	62500	31250	15625	7812.5	3906.25	1953.12	976.562	488.281	244.141	5 n1
21%CT	1	7879	8397	9563	10320	11693	12461	16252	18293	18558	19119	20199	20182			96.5102	91.6068	80.5695	73.4038	60.407	53.1372	17.2517	-2.06831	-4.57679	-9.8872	-20.1104	-19.9495	1
FG	1 fg	7760	7721	8055	9468	10458	12998	14389	15453	16000	17447	17625	18027			97.6367	98.0058	94.8442	81.4688	72.0975	48.054	34.8868	24.815	19.6371	5.93989	4.25495	0.449633	1 fg
0.05	1 5	19837	8242	9160	10193	11588	13889	16807	16599	17264	18090	18547	18499			-16.6838	93.0741	84.3843	74.606	61.401	39.6198	11.9981	13.967	7.67216	-0.146722	-4.47267	-4.0183	1 5%
0.01	1 1	19056	7840	7724	7872	8713	10657	12361	14658	15599	17553	19229	19062	Pos CT	Neg CT	-9.29084	96.8794	97.9774	96.5765	88.6156	70.2138	54.0838	32.3405	23.433	4.9365	-10.9285	-9.34764	1 1%
CTs	H	7736	7960	7859	8281	7618	17738	18002	18147	7544	7502	7507	7522	18074.5	7510.33	97.8638	95.7435	96.6995	92.7049	98.9808	3.1853	0.686282	-0.686282	99.6813	100.079	100.032	99.8896	0
														4780.16	8.49837
assay in 5% n=5		1	2	3	4	5	6	7	8	9	10	11	12	OT-I cell number		500000	250000	125000	62500	31250	15625	7812.5	3906.25	1953.12	976.562	488.281	244.141	5 n2
21%CT	5	8177	9416	10991	15282	16187	17057	18221	18116	18155	18010	18298	18518			95.5238	85.8222	73.4898	39.8906	32.8044	25.9921	16.8779	17.7	17.3947	18.53	16.2749	14.5523	5
FG	5 FG	7658	8082	8491	10038	11580	13148	14105	16432	16937	17176	17573	17122			99.5876	96.2676	93.0651	80.9519	68.8778	56.6002	49.1067	30.886	26.9318	25.0604	21.9518	25.4832	5 fg
0.05	5 5	8322	8460	8909	10867	13528	15517	16203	16632	17131	16682	17265	16929			94.3884	93.3078	89.7921	74.4607	53.6247	38.0506	32.6791	29.32	25.4127	28.9284	24.3635	26.9944	5 5%
0.01	5 1	7860	7992	7758	8193	9181	10469	11304	13413	15442	17942	17521	18750	Pos CT	Neg CT	98.0059	96.9723	98.8046	95.3985	87.6623	77.5771	71.0389	54.5252	38.6378	19.0625	22.359	12.7357	5 1%
CTs	H	8327	7925	7680	15654	7683	18953	19828	20925	7599	7564	7560	7692	20376.5	7605.33	94.3493	97.497	99.4153	36.9778	99.3919	11.1462	4.29483	-4.29483	100.05	100.324	100.355	99.3214	0
														5623.28	61.3043
assay in 1% n=4		1	2	3	4	5	6	7	8	9	10	11	12	OT-I cell number		500000	250000	125000	62500	31250	15625	7812.5	3906.25	1953.12	976.562	488.281	244.141	1 n1
21%CT	1	7971	8918	9973	12139	12005	14582	16992	18903	17703	17708	18267	18117			96.1629	87.5044	77.8584	58.0543	59.2795	35.7177	13.6827	-3.78983	7.18193	7.13622	2.0252	3.39667	1
FG	1 fg	7681	7695	8506	9663	11630	13455	16125	16192	17080	17272	18288	17862			98.8144	98.6864	91.2714	80.6927	62.7082	46.022	21.6098	20.9972	12.8781	11.1226	1.8332	5.72817	1 fg
0.05	1 5	8475	8490	9535	11012	12363	14459	16198	16652	16802	17424	17471	16954			91.5548	91.4176	81.8631	68.3587	56.0063	36.8423	20.9424	16.7914	15.4199	9.73287	9.30314	14.0301	1 5%
0.01	1 1	7866	8000	7790	7727	8874	11207	12396	14232	16250	17273	17626	17630	Pos CT	Neg CT	97.123	95.8978	97.8178	98.3939	87.9067	66.5757	55.7046	38.9178	20.4669	11.1135	7.88595	7.84938	1 1%
CTs	H	7732	7981	7746	8408	7674	18466	18515	18462	7553	7535	7550	7569	18488.5	7551.33	98.3481	96.0715	98.2201	92.1674	98.8784	0.205721	-0.242293	0.242293	99.9848	100.149	100.012	99.8385	0
														5017.23	13.9124
assay in 1% n=5		1	2	3	4	5	6	7	8	9	10	11	12	OT-I cell number		500000	250000	125000	62500	31250	15625	7812.5	3906.25	1953.12	976.562	488.281	244.141	1 n2
21%CT	5	8709	9382	11418	15158	15911	17415	18665	18684	18271	19338	19492	19514			89.4153	83.262	64.6465	30.4512	23.5664	9.81516	-1.61376	-1.78748	1.98863	-7.76709	-9.17514	-9.37629	5
FG	5 FG	7723	8109	9932	11371	11622	13208	15249	14722	14638	15411	15701	15219			98.4304	94.9012	78.2332	65.0763	62.7813	48.2803	29.6192	34.4376	35.2056	28.138	25.4865	29.8935	5 fg
0.05	5 5	8094	8679	10007	11804	15136	15603	17369	17329	17442	17700	18191	18574			95.0383	89.6896	77.5475	61.1173	30.6524	26.3825	10.2357	10.6015	9.56829	7.20936	2.72008	-0.781738	5 5%
0.01	5 1	7818	7987	7732	7994	9931	11417	12642	14696	15375	17376	18094	18648	Pos CT	Neg CT	97.5618	96.0166	98.3481	95.9526	78.2424	64.6557	53.4553	34.6753	28.4672	10.1717	3.60697	-1.45833	5 1%
CTs	H	8216	7876	7887	9793	7881	18311	18694	18021	7659	7532	7525	7558	18357.5	7538.33	93.9229	97.0315	96.931	79.5041	96.9858	1.62291	-1.87891	4.27442	99.0156	100.177	100.241	99.939	0
														4811.15	14.197

## Sheet: Fig 1I
Counts
	21%O2	5%O2	1%O2	FG-4562		5%O2	1%O2	FG-4562
PC069a	3.13	1.57		1.82	1	0.501597		0.58147
	2.08	1.34		1.67	1	0.644231		0.802885
PC069b	3.065	2.41	0.502	2.44	1	0.786297	0.163785	0.796085
PC070a	4.35	2.95		2.73	1	0.678161		0.627586
	3.57	2.23		3.23	1	0.62465		0.904762
	3.07	2.17		2.23	1	0.70684		0.726384
PC069d	3.78	3.42	0.87	3.3	1	0.904762	0.230159	0.873016
	4.59	3.15	0.618	3.84	1	0.686275	0.134641	0.836601
RAW					FC
EC50
1% cytotox	21%O2	5%O2	1%O2	FG-4562	21%O2	5%O2	1%O2	FG-4562
PC069b	10958	4311	3281	14824	1	0.393411	0.299416	1.3528
PC069c
PC069c	53690	29520	3609	63077	1	0.549823	0.0672192	1.17484
PC069d	33494	25428	6320	17793	1	0.759181	0.188691	0.531229
PC069d	91702	45154	7098	14281	1	0.492399	0.0774029	0.155733
RAW					FC
