# Supplementary material for: Oxygen levels at the time of activation determine T cell persistence and immunotherapeutic efficacy
Source: eLife journal article supplement (doi:10.7554/elife.84280), 2023-05-11
Supplement: fig1-figsupp1-data1 [file Figure 1 - figure supplement 1 - Source Data 1.xlsx]

## Sheet: Fig1 Fig S1A
	21%O2				5%O2				1%O2
hours after activation	PC001c	PC001d	PC001d	PC001d	PC001c	PC001d	PC001d	PC001d	PC001c	PC001d	PC001d	PC001d
0		69	67	85		69	67	85		69	67	85
4	78.5	62	65	64	78	64	66	56	76.5	56	59	66
12	80	72	76	61	83	77	73	65	79.5	61	42	62
24	83	55	42	56	85.5	58	71	58	74.5	48	58	67
48	87.5	90	92	83	87	89	90	89	70	86	86	84
72	93	93	91	89	92	98	98	91	75	78	78	67
Tukey's multiple comparisons test	Mean Diff.	95.00% CI of diff.	Below threshold?	Summary	Adjusted P Value
72h
21% vs. 5%	-3.25	-10.56 to 4.063	No	ns	0.2941
21% vs. 1%	17	8.818 to 25.18	Yes	**	0.0066
5% vs. 1%	20.25	14.25 to 26.25	Yes	**	0.0016

## Sheet: Fig1 Fig S1B
																	Full blots provided in this zip folder
																Additional info:
																Protein ladder: PageRuler 10-180kDa
																Running buffer: Tris acetate
																Cut membrane: at 85kDa before incubation with primary and secondary antibodies
																Method of detection: fluorescence with LICOR
					Vhl KO positive control			HIF1 and LaminB bloted with 800CW secondary
								HIF2 and Tubulin bloted with 680RD secondary
				relevant bands used in Fig S1B				Each blot was cut at 85kDa before incubation with primary ans secondary antibodies

## Sheet: Fig1 Fig S1C
	WT21	WT1	HIF-1α KO	HIF-2α KO
PC002d	1.998	6.446	1.835	7.349
	2.002	8.814	2.373	7.018
		7.221		8.486
Šídák's multiple comparisons test	Mean Diff.	95.00% CI of diff.	Below threshold?	Summary	Adjusted P Value
WT21 vs. WT1	-5.494	-8.446 to -2.541	Yes	**	0.0023
WT1 vs. HIF-1α KO	5.39	2.437 to 8.342	Yes	**	0.0025
WT1 vs. HIF-2α KO	-0.124	-2.765 to 2.517	No	ns	>0.9999
HIF-1α KO vs. HIF-2α KO	-5.514	-8.466 to -2.561	Yes	**	0.0022

## Sheet: Fig1 Fig S1D
	CD44						CD127
		21%O2	5%O2	1%O2	FG-4562			21%O2	5%O2	1%O2	FG-4562
	PC069a	15.967	14.618		15.893
		18.808	14.584		15.819
	PC069b	21.494	21.462	24.104	18.2		PC069b	0.345	0.687	0.794	0.409
	PC069c	20.472	27.939	39.765	20.089		PC069c	0.314	1.093	1.036	0.565
		20.617	27.607	30.016	22.237			0.335	1.008	1.141	0.679
	PC069d	28.614	49.68	54.747	27.806		PC069e	0.376		0.92	0.347
		31.114	36.724	33.116	23.763			0.461		0.88	0.405
								0.486		0.7	0.409
	PC069e	11.2		41.9	11.26
		11.36		48.8	12.07
		11.32		69	12.81
	Shapiro-Wilk test						Shapiro-Wilk test
	W	0.9073	0.9183	0.967	0.9509		W	0.8777	0.8988	0.9864	0.8398
	P value	0.2631	0.4563	0.8736	0.6787		P value	0.2588	0.3816	0.9786	0.1299
	Passed normality test (alpha=0.05)?	Yes	Yes	Yes	Yes		Passed normality test (alpha=0.05)?	Yes	Yes	Yes	Yes
	P value summary	ns	ns	ns	ns		P value summary	ns	ns	ns	ns
	Holm-Šídák's multiple comparisons test	Mean Diff.	Below threshold?	Summary	Adjusted P Value		Holm-Šídák's multiple comparisons test	Mean Diff.	Below threshold?	Summary	Adjusted P Value
	21%O2 vs. 5%O2	-8.42	No	ns	0.0743		21%O2 vs. 5%O2	-0.5432	No	ns	0.0873
	21%O2 vs. 1%O2	-23.58	Yes	*	0.023		21%O2 vs. 1%O2	-0.5257	Yes	**	0.0056
	21%O2 vs. FG-4562	1.102	No	ns	0.2362		21%O2 vs. FG-4562	-0.08283	No	ns	0.3001

## Sheet: Fig1 Fig S1E
EC50						EC50						EC50
21% cytotox	21%O2	5%O2	1%O2	FG-4562		5% cytotox	21%O2	5%O2	1%O2	FG-4562		1% cytotox	21%O2	5%O2	1%O2	FG-4562
PC069b n1	18530	3542	1794	10799		PC069b n1	7404	1963	1865	7537		PC069b n1	10958	4311	3281	14824
PC069c	47572	9828	6405	27539		PC069c	19195	7410	10380	15713
PC069c n2	121989	21473	15963	32929		PC069c n2	24255	6567	3609	16613		PC069c n2	53690	29520	3609	63077
PC069d n3	55118	26201	6601	13213		PC069d n3	25805	25423	7300	13774		PC069d n3	33494	25428	6320	17793
						PC069d n4	60251	19698	3612	9756		PC069d n4	91702	45154	7098	14281
Shapiro-Wilk test						Shapiro-Wilk test						Shapiro-Wilk test
W	0.9004	0.943	0.9616	0.9432		W	0.865	0.9013	0.9071	0.9168		W	0.9829	0.9725	0.8584	0.683
P value	0.4122	0.6726	0.819	0.6887		P value	0.2467	0.4173	0.4503	0.5096		P value	0.9191	0.8569	0.2545	0.0072
Passed normality test (alpha=0.05)?	Yes	Yes	Yes	Yes		Passed normality test (alpha=0.05)?	Yes	Yes	Yes	Yes		Passed normality test (alpha=0.05)?	Yes	Yes	Yes	No
P value summary	ns	ns	ns	ns		P value summary	ns	ns	ns	ns		P value summary	ns	ns	ns	**
Dunn's multiple comparisons test	Rank sum diff.	Significant?	Summary	Adjusted P Value		Dunn's multiple comparisons test	Rank sum diff.	Significant?	Summary	Adjusted P Value		Dunn's multiple comparisons test	Rank sum diff.	Significant?	Summary	Adjusted P Value
21%O2 vs. 5%O2	7	No	ns	0.1657		21%O2 vs. 5%O2	8	No	ns	0.1501		21%O2 vs. 5%O2	4	No	ns	0.82
21%O2 vs. 1%O2	12	Yes	**	0.003		21%O2 vs. 1%O2	13	Yes	**	0.0044		21%O2 vs. 1%O2	10	Yes	*	0.0185
21%O2 vs. FG-4562	5	No	ns	0.5127		21%O2 vs. FG-4562	5	No	ns	0.662		21%O2 vs. FG-4592	2	No	ns	>0.9999
