# Supplementary material for: Oxygen levels at the time of activation determine T cell persistence and immunotherapeutic efficacy
Source: eLife journal article supplement (doi:10.7554/elife.84280), 2023-05-11
Supplement: fig2-data1 [file Figure 2 - Source data 1.xlsx]

## Sheet: Fig 2C
	PC050a											PC050b													ACT cells/mL or blood
						bead corrected counts/mL (35ul of blood)											bead corrected counts								1%O2	5%O2	21%O2	FG-4592	NoT
t cells	beads	CD45+	CD8+/T cells	Endo CD8	OT-I	CD45+	CD8+T cells	Endo CD8	OT-I		t cells	beads counts	cd45+ counts	CD8+ COUNTS	ACT CD8	ENDO CD8	CD45+	CD8	ACT	ENDO	blood vol (uL)	act/ml		PC050a	6813.22	1827.53	6038.31	1211.91	0
1	6479	17071	1676	1526	150	775390	76126.4	69313.2	6813.22		1	6199	17116	982	330	627	28163.1	1615.81	542.991	1031.68	40	13574.8			2434.63	3285.49	4588.65	11525.2	91.85
1	5802	23103	2473	2425	48	1.17182e+06	125434	122999	2434.63		1	5471	14613	971	387	546	27244.1	1810.31	721.513	1017.95	40	18037.8			6518.01	8376.84	3506.61	6656.1	0
1	6637	25455	2947	2800	147	1.12868e+06	130670	124152	6518.01		1	5924	11027	828	271	526	18986.4	1425.66	466.61	905.672	40	11665.3			1556.13	17806.5	8511.29	928.76	0
1	6619	23964	1961	1926	35	1.06546e+06	87187.5	85631.4	1556.13		1	5678	15465	3007	2280	693	27781.4	5401.8	4095.81	1244.91	40	102395			27196.9	3030.75	1313.58	694.18	0
1	6211	19551	2376	1802	574	926353	112578	85381.2	27196.9		1	6489	14411	1010	543	430	22652.5	1587.61	853.537	675.913	35	24386.8			7435.83	3616.87	960.22	1674.91
1	6451	13973	1190	1027	163	637429	54286.2	46850.3	7435.83		1	6475	6796	349	23	306	10705.7	549.776	36.2317	482.039	40	905.792			58311.6	547.68	480.43	843.95
1	6581	20300	2947	1642	1304	907765	131782	73426.1	58311.6		1	6338	12721	737	44	662	20472.4	1186.08	70.811	1065.38	40	1770.27			3287.61	1724.33	3449.01
1	6624	22204	1746	1672	74	986461	77569.9	74282.3	3287.61		1	6134	14257	1131	428	692	23707.4	1880.7	711.705	1150.7	40	17792.6			1248.48	44.14	2028.26
1	6600	18606	1373	1345	28	829618	61220.3	59971.9	1248.48		1	5711	14070	851	314	512	25129.4	1519.91	560.812	914.446	40	14020.3			3498.44	4102.96	137.62
1	7066	8813	837	753	84	367045	34859.5	31361	3498.44		1	5678	16499	1178	280	857	29638.9	2116.17	502.994	1539.52	40	12574.9		PC050b	13575		7551	10419	87
5	5475	29276	1815	1781	34	1.57361e+06	97557.7	95730.2	1827.53		5	6028	13285	653	221	420	22479.6	1104.94	373.955	710.683	35	10684.4			18038	10684	3163	11065	88
5	5643	31742	3074	3010	63	1.65536e+06	160311	156973	3285.49		5	5419	12301	616	69	525	23153.8	1159.48	129.876	988.19	40	3246.91			11665	3247	9040	38732	186
5	6710	23353	1733	1541	191	1.02421e+06	76005.5	67584.8	8376.84		5	5889	9980	1054	514	487	17285.8	1825.57	890.27	843.505	40	22256.7			102395	22257	10680	11155	41
5	6797	18107	1320	1250	70	783968	57151.3	54120.5	3030.75		5	5759	8827	353	51	279	15633.9	625.213	90.3282	494.148	40	2258.2			24387	2258	4730	7491	47
5	6916	19436	2342	2257	85	827030	99655.5	96038.6	3616.87		5	5438	15777	1606	1210	375	29592.8	3012.36	2269.58	703.384	40	56739.6			906	56740	626	4927	180
5	6448	13194	1594	1582	12	602172	72749.9	72202.2	547.678		5	6150	22574	1517	400	1083	37439.8	2516	663.415	1796.2	40	16585.4			1770	16585	5162	6159	50
5	6144	17476	1542	1505	36	837067	73858.8	72086.6	1724.33		5	5839	12933	477	14	423	22592.3	833.259	24.4562	738.928	40	611.406			17793	611	8571	42867
5	6667	12994	1278	1275	1	573564	56411.8	56279.3	44.1407		5	4616	26769	1756	778	949	59151.6	3880.24	1719.15	2097.01	40	42978.8			14020	42979	503	17488
5	6527	31486	2311	2220	91	1.41962e+06	104197	100094	4102.96		5	6115	28060	2447	1097	1313	46804.9	4081.67	1829.83	2190.12	40	45745.7			12575	45746	1791	5393
21	6287	21153	1039	910	129	990142	48634.1	42595.8	6038.31		21	5437	13571	498	161	325	25459.7	934.265	302.042	609.711	40	7551.04
21	6734	22361	1556	1452	105	977209	67999.5	63454.5	4588.65		21	6610	20116	711	82	622	31041.3	1097.16	126.536	959.818	40	3163.39		Shapiro-Wilk test
21	6546	26269	2199	2121	78	1.18096e+06	98859.5	95352.9	3506.61		21	6093	15984	995	216	741	26758.1	1665.68	361.595	1240.47	40	9039.88		W	0.6378	0.731	0.9173	0.7281	0.8531
21	6604	23108	2000	1809	191	1.02973e+06	89123.5	80612.2	8511.29		21	5611	14386	882	235	632	26151.7	1603.35	427.197	1148.89	40	10679.9		P value	<0.0001	0.0001	0.0878	0.0002	0.0401
21	6721	15379	1153	1123	30	673385	50485.3	49171.7	1313.58		21	6038	11242	428	112	296	18991.1	723.021	189.202	500.033	40	4730.04		Passed normality test (alpha=0.05)?	No	No	Yes	No	No
21	6436	19054	1805	1784	21	871243	82533.5	81573.3	960.224		21	6107	11142	494	15	454	18609.5	825.086	25.0532	758.277	40	626.33		P value summary	****	***	ns	***	*
21	6738	17700	1248	1236	11	773057	54507.1	53983	480.431		21	5928	8569	341	120	196	14744.2	586.741	206.478	337.247	40	5161.94
21	6570	22083	1545	1469	77	989149	69204.2	65800	3449.01		21	5504	11058	855	185	659	20492.7	1584.48	342.842	1221.26	40	8571.04		Dunn's multiple comparisons test	Mean rank diff.	Significant?	Summary	Adjusted P Value
21	6239	18180	1766	1723	43	857528	83300	81271.7	2028.26		21	6085	11383	325	12	296	19080.8	544.782	20.115	496.171	40	502.876		21%O2 vs. 1%O2	-17.9	Yes	*	0.0311
21	6415	17151	1320	1317	3	786796	60554.5	60416.9	137.624		21	6548	15768	782	46	722	24562.2	1218.14	71.6555	1124.68	40	1791.39		21%O2 vs. 5%O2	-10.14	No	ns	0.4557
FG	7042	24863	2432	2403	29	1.03903e+06	101633	100422	1211.91		FG	5262	19292	872	215	632	37396.1	1690.31	416.762	1225.09	40	10419		21%O2 vs. FG-4592	-11.87	No	ns	0.3096
FG	6358	17587	1739	1490	249	814030	80491.2	68966	11525.2		FG	5577	14787	993	242	725	27044.5	1816.14	442.604	1325.98	40	11065.1
FG	6853	24891	1980	1825	155	1.06888e+06	85026.4	78370.3	6656.1		FG	6248	25624	2088	949	1063	41831.8	3408.71	1549.26	1735.37	40	38731.6
FG	6654	14657	1278	1257	21	648234	56522	55593.2	928.765		FG	6172	9561	711	270	424	15800.7	1175.02	446.209	700.713	40	11155.2
FG	6359	17291	2250	2235	15	800204	104127	103433	694.179		FG	6093	12133	629	179	428	20311.3	1052.98	299.655	716.494	40	7491.38
FG	6501	24378	2255	2218	37	1.10354e+06	102079	100404	1674.91		FG	6056	11060	610	117	448	18628.1	1027.41	197.061	754.557	40	4926.52
FG	6974	15286	1910	1890	20	645032	80597.3	79753.4	843.951		FG	5175	14678	1015	125	874	28930.6	2000.58	246.377	1722.67	40	6159.42
NoT	6328	21843	2224	2224	1	1.01582e+06	103428	103428	46.5053		FG	5217	21702	1901	877	989	42430.6	3716.73	1714.66	1933.64	40	42866.6
NoT	6408	24238	1804	1802	2	1.11312e+06	82848.2	82756.4	91.8495		FG	6022	17122	1264	413	832	29001.1	2140.95	699.535	1409.23	40	17488.4
NoT	6655	14730	1550	1550	0	651364	68541.4	68541.4	0		FG	5985	11680	401	10	379	19905.8	683.409	17.0426	645.915	40	426.065
NoT	6757	28487	1896	1896	0	1.24069e+06	82576	82576	0		NoT	5884	12755	586	2	559	22111	1015.84	3.46703	969.035	40	86.6757
NoT	6936	23701	1814	1814	0	1.0056e+06	76965.7	76965.7	0		NoT	5816	12701	580	2	555	22274.8	1017.19	3.50757	973.349	40	87.6891
											NoT	5478	10545	518	4	498	19634.7	964.513	7.44797	927.273	40	186.199
		beads= 10uL of 0.515E5/50uL									NoT	6238	7824	356	1	338	12793.3	582.11	1.63514	552.677	40	40.8785
											NoT	5414	8562	363	1	352	16130.8	683.894	1.884	663.17	40	47.1001
											NOT	5661	13173	541	4	517	23735.1	974.775	7.20721	931.532	40	180.18
											NOT	5886	12908	734	1	716	22368.6	1271.97	1.73293	1240.77	35	49.5122

## Sheet: Fig 2D
	CD44+CD62L- day 14
	1%O2	5%O2	21%O2	FG-4592			Shapiro-Wilk test	1%O2	5%O2	21%O2	FG-4592
PC050a	70.7	32.4	84.5	13.8			W	0.9115	0.9155	0.9089	0.8864
	72.9	36.5	71.4	82.7			P value	0.0681	0.0933	0.0607	0.0404
	66	81.7	80.8	89.7			Passed normality test (alpha=0.05)?	Yes	Yes	Yes	No
	45.7	83.2	62.8	14.3			P value summary	ns	ns	ns	*
	93.9	60	76.7	73.3
	94.5	88.2	66.7	29.7
	96.5	33.3	18.2	85			Dunn's multiple comparisons test	Mean rank diff.	Significant?	Summary	Adjusted P Value
	87.8	80.6	79.2				21%O2 vs. 1%O2	-18.6	Yes	*	0.0232
	85.7	0	46.5				21%O2 vs. 5%O2	-7.428	No	ns	0.8813
	86.9	96.7	0				21%O2 vs. FG-4592	3.919	No	ns	>0.9999
PC050b	60.3	45.2	25.5	46
	57.4	34.8	23.2	49.6
	57.6	70	22.2	29.9
	94.6	41.2	42.6	94.1
	87.5	86.9	17	15.6
	91.3	66.2	80	29.9
	54.5	78.6	94.2	14.4
	64.3	67.9	42.7	54
	55.1	82	83.3	26.2
	76.1		15.2	40

## Sheet: Fig 2E
Summary data
T-cells	0	7	9	11	13	14	16	18	20	22	24	26	28	30	33	35	37	39	42	44	46	T-cells
1	0	20.776	56.628	81.867	80.8	20.691	7.1415	4.6305	2.7455	7.1415	36.7855	56.277	293.091	653.072								1		1%O2	5%O2	21%O2	21%O2 + FG	NoT
1	0	53.3355	55.566	52.022	33.28	22.9635	10.53	14.8	8.4	17.298	28.749	46.2275	116.272	155.232	379.688	631.774						1	Exponential (Malthusian) growth
1	0	24.75	25.6505	34.2	26.656	24.389	0	0	0	0	0	0	0	0	7.8125	21.2355	55.016	102.602	216.562	567.788		1	Best-fit values
1	0	0	0	0	0	0	0	0	0	0	0	0										1	Y0	8.764	8.31	9.698	13.7	2.013
1	0	24.576	26.136	80.525	59.3	57.156	12.844	21.999	6.912	6.912	0	0	58.968	123.547	612.794							1	k	0.0799	0.08849	0.09802	0.066	0.2377
1	0	9.9225	17.576	0	28.7955	44.506	27.328	40.96	51.262	65.268	99.6415	116.25										1	DoublingTime	8.675	7.833	7.072	10.5	2.916
1	0	13.456	23.8875	37.2645	29.403	12.615	19.8	15.309	7.018	7.935	6.912	12.0285	29.602	26.588	57.319	91.936	88.434	172.032	210.983	501	719.264	1	95% CI (profile likelihood)
1	0	38.4	53.8835	82.654	26.588	19.7005	0	21.504	0	0	0	39.2	40.344	89.2375	267.898	559.558						1	Y0	7.932 to 38.29	-6.591 to ???	9.147 to ???	-13.38 to 76.94	-1.666 to ???
1	0	15.309	26.25	33.574	31.404	16.8975	11.2455	0	0	0	0	93.312	208.088	339.575	522.199							1	k	0.07570 to 0.1148	0.06964 to 0.09599	0.07853 to 0.1068	0.05727 to 0.07812	0.1556 to 0.2490
1	0	5.994	14.8955	38.808	15.75	0	0	0	0	0	0	0	0	0	0	0	0	0	0	0	0	1	DoublingTime	6.039 to 9.157	7.221 to 9.953	6.492 to 8.827	8.873 to 12.10	2.784 to 4.453
5	0	20.6045	17.5	22.2345	23.1275	43.808	17.576	5.9565	8.788	0	0	0	0	0	0	0	0	0	0	0	0	5	Goodness of Fit
5	0	33.462	34.983	23.698	19.0575	15.8565	5.324	7.6705	8.4375	0	0	19.652	53.6625	53.016	102.602	99.0945	101.92	224.516	246.054	647.352		5	Degrees of Freedom	139	150	141	176	73
5	0	0	8.7285	9.126	4.6305	0	0	0	0	0	0	0	0	379.688	869.938							5	R squared (weighted)	0.2125	0.2384	0.2829	0.166	0.4943
5	0	32.856	29.4335	31.768	27.166	15.288	10.625	12.1875	13.52	15.3125	16.384	15.138	34.4605	52.7065	152.762	177.531	346.788	599.04				5	Weighted Sum of Squares (1/Y²)	244.6	261.3	220.7	359.7	73.36
5	0	73.9125	95.992	141.398	93.288	94.08	32.4625	20.776	14.872	20.992	33.212	68.4285	136.462	320.339	540.653							5	Sy.x	1.326	1.32	1.251	1.43	1.002
5	0	32.7015	25.088	44.982	28.749	68.921	8.064	8.125	0	0	0	95.8455	169.016	154.212	393.576	567.018						5
5	0	57.6	50.625	62.5	36.992	19.683	21.6	18.252	0	9.8415	0	38.4	135.76	118.588	359.856	691.488						5	Number of points
5	0	0	0	0	0	0	0	0	0	0	18.45	66.25	73.2305	105.593	221.952	277.725	504.21					5	# of X values	230	230	230	230	160
21	0	10.976	23.292	31.8355	29.2945	15.625	5.8	0	0	0	0	0	0	9.8415	58.752	95.648	313.992	583.495				21	# Y values analyzed	141	152	143	178	75
21	0	6.292	49.284	51.2705	65.268	41.616	0	0	0	19.652	41.6025	173.4	277.725	377.496	817.216							21
21	0	0	30.634	0	0	8.228	44.764	0	0	0	0	173.95	202.343	417.874	986.123							21
21	0	9.8415	53.6	66.9335	65.236	0	0	0	5.324	13.4865	26.568	68.75	213.704	386.283	584.064							21
21	0	32.768	95	75.9375	106.25	50.43	34.848	16.9	51.304	0	50.8475	176.62	319.41	648.96								21
21	0	32.4625	36.288	55.728	31.744	42.588	35.258	32.674	10.3635	20.181	20.6045	91.008	275.625	579.15								21
21	0	5.994	0	0	86.5715	52.65	34.656	34.4	24.5	57.132	124.848	358.4	333.062	599.4								21
21	0	0	0	0	0	0	0	23.5445	0	0	0	0	0	0	0	0	0	0	0	0	0	21
21	0	77.2475	114.95	128.797	202.176	169.016	78.416	37.044	26.95	33.462	75.6315	233.928	446.976	635.688								21
21	0	13.0355	8.788	14.8955	10.14	7.488	8.1995	8.788	3.4295	0	3.4295	3.4295	2.5875	0	0	0	0	0	0	0	0	21
FG	0	25.432	44.109	53.24	38.7855	31.752	15.5585	0	0	0	0	0	16.337	0	17.55	21.504	36.982	86.2125	270.738	900.422		FG
FG	0	0	83.1875	113.724	44.8695	23.4	0	23.4	0	0	0	0	0	57.6	192.237	238.464	333.894	718.8				FG
FG	0	0	0	0	0	0	0	0	0	0	0	63.48	128.797	234.196	578.812							FG
FG	0	0	115.973	228.69	161.838	138.058	73.0355	47.915	12.506	46.208	38.4	108.9	216.763	210.392	538.996							FG
FG	0	18.75	14.872	34.9125	22.2865	19.604	19.6	7.0395	0	0	0	0	0	0	0	0	0	0	7.26	0	0	FG
FG	0	27.216	36.504	66.0275	48.668	20.992	14.504	7.6705	7.986	9.802	18.9	36.2785	53.802	55.566	179.56	298.125	627.356					FG
FG	0	0	7.8125	24.389	13.2275	5.3465	0	0	0	0	0	0	2.916	0	0	0	0	0	0	0	0	FG
FG	0	58.5385	79.233	157.604	60.7475	40.572	48.6	35.2	49.726	47.628	109.76	278.663	558.624									FG
FG	0	33.6875	60.0925	68.77	47.9115	57.154	31.2325	9.8	4.6305	0	0	28.314	108.16	139.153	437.112	790.356						FG
FG	0	25.872	31.347	31.5	34.596	34.1155	33.28	24.304	26.136	38.988	47.1495	75	102.85	135.816	207.104	231.231	391.988	542.626				FG
NoT	0	27.216	26.95	44	45.486	55.6875	40.8	129.96	145.119	477.144	625	625	625	625	625	625						NoT
NoT	0	12.1945	19.652	27.436	22.05	77.254	25.92	228.306	554.404													NoT
NoT	0	0	0	0	64.856	63.888	109.35	226.845	628.425													NoT
NoT	0	39.7535	18.9225	23.064	37.8455	29.478	31.104	45.3005	95.506	99.825	112.091	124.2	205.166	226.482	376.248	577.6						NoT
NoT	0	15.68	14.6875	18.502	13.72	13.52	29.43	59.6475	152.158	587.951												NoT
NOT	0	29.184	60.984	135	95.992	100.352	148.838	196.02	329.6	577.6												NOT
NOT	0	13.5	0	0	0	21.4455	80.4335	177.184	541.183													NOT
Raw data
#	Cage	Tag	Animal	DOB	T-cells	Weight d0	Date	DAY	Age	Weight (g)	a (mm)	b (mm)	ID	Rel weight	Tumor vol	with 2nd tumor	2nd tumor	2ns a	2nd b	2021-04-05	Comment
1	A	0	399597	2021-02-03	NoT	18.5	2021-04-09	4	9.28571	19			A0	0.027027		0
2	A	1	399598	2021-02-03	21	19.9	2021-04-09	4	9.28571	19.5			A1	-0.0201005		0
3	A	2	399599	2021-02-03	DF	20.8	2021-04-09	4	9.28571	20.2			A2	-0.0288462		0
4	A	3	399600	2021-02-03	FG	19	2021-04-09	4	9.28571	18.5			A3	-0.0263158		0
5	A	4	399601	2021-02-03	21	18.5	2021-04-09	4	9.28571	19.1			A4	0.0324324		0
6	B	0	399602	2021-02-03		19.9	2021-04-09	4	9.28571	20.6			B0	0.0351759		0
7	B	1	399603	2021-02-03	FIH	18.7	2021-04-09	4	9.28571	19.2			B1	0.026738		0
8	B	2	399604	2021-02-03	5	19	2021-04-09	4	9.28571	19.2			B2	0.0105263		0
9	B	3	399605	2021-02-03	FG	21.2	2021-04-09	4	9.28571	21.1			B3	-0.00471698		0
10	B	4	399606	2021-02-03	FIH	21.2	2021-04-09	4	9.28571	21.6			B4	0.0188679		0
11	C	0	399607	2021-02-03	DF	19.4	2021-04-09	4	9.28571	19.3			C0	-0.00515464		0
12	C	1	399608	2021-02-03	DF	19.8	2021-04-09	4	9.28571	19.8			C1	0		0
13	C	2	399609	2021-02-03	FG	19.8	2021-04-09	4	9.28571	19.4			C2	-0.020202		0
14	C	3	399610	2021-02-03	DF	19.5	2021-04-09	4	9.28571	19.3			C3	-0.0102564		0
15	C	4	399611	2021-02-03	1	20.1	2021-04-09	4	9.28571	20.6			C4	0.0248756		0
16	D	0	399612	2021-02-03	21	18.6	2021-04-09	4	9.28571	19.5			D0	0.0483871		0
17	D	1	399613	2021-02-03	5	20.4	2021-04-09	4	9.28571	20.9			D1	0.0245098		0
18	D	2	399614	2021-02-03	1	18.8	2021-04-09	4	9.28571	19.1			D2	0.0159574		0
19	D	3	399615	2021-02-03	5	21.1	2021-04-09	4	9.28571	21.1			D3	0		0
20	D	4	399616	2021-02-03	1	18.8	2021-04-09	4	9.28571	20.1			D4	0.0691489		0
21	E	0	399617	2021-02-03	21	19.6	2021-04-09	4	9.28571	20.7			E0	0.0561224		0
22	E	1	399618	2021-02-03	21	20.3	2021-04-09	4	9.28571	21.6			E1	0.0640394		0
23	E	2	399619	2021-02-03	21	18.4	2021-04-09	4	9.28571	18.8			E2	0.0217391		0
24	E	3	399620	2021-02-03	5	21.1	2021-04-09	4	9.28571	20.3			E3	-0.0379147		0
25	E	4	399621	2021-02-03	FIH	18	2021-04-09	4	9.28571	18.8			E4	0.0444444		0
26	F	0	399622	2021-02-03	NoT	18.7	2021-04-09	4	9.28571	19.6			F0	0.0481283		0
27	F	1	399623	2021-02-03	FG	19.3	2021-04-09	4	9.28571	19.6			F1	0.015544		0
28	F	2	399624	2021-02-03	1	19.4	2021-04-09	4	9.28571	19.7			F2	0.0154639		0					IP?
29	F	3	399625	2021-02-03	1	20.5	2021-04-09	4	9.28571	20.3			F3	-0.0097561		0
30	F	4	399626	2021-02-03	NoT	21.4	2021-04-09	4	9.28571	21.8			F4	0.0186916		0
31								-44291
32	G	1	399628	2021-02-03	5	21.2	2021-04-09	4	9.28571	21.7			G1	0.0235849		0
33	G	2	399629	2021-02-03	5	18.5	2021-04-09	4	9.28571	19.2			G2	0.0378378		0
34	G	3	399630	2021-02-03	VHL	21	2021-04-09	4	9.28571	21.7			G3	0.0333333		0
35	G	4	399631	2021-02-03	FG	19.1	2021-04-09	4	9.28571	18.9			G4	-0.0104712		0
36	H	0	399632	2021-02-03	1	19.7	2021-04-09	4	9.28571	20.4			H0	0.035533		0
37	H	1	399633	2021-02-03	NoT	20.8	2021-04-09	4	9.28571	22.4			H1	0.0769231		0
38	H	2	399634	2021-02-03	FG	19	2021-04-09	4	9.28571	19.3			H2	0.0157895		0
39	H	3	399635	2021-02-03	VHL	20.4	2021-04-09	4	9.28571	20.9			H3	0.0245098		0
40	H	4	399636	2021-02-03	FG	19	2021-04-09	4	9.28571	19.6			H4	0.0315789		0
41	I	0	399637	2021-02-03	NoT	20.4	2021-04-09	4	9.28571	20			I0	-0.0196078		0
42	I	1	399638	2021-02-03	DIH	19.8	2021-04-09	4	9.28571	20.6			I1	0.040404		0
43	I	2	399639	2021-02-03	DIH	19.6	2021-04-09	4	9.28571	20.4			I2	0.0408163		0
44	I	3	399640	2021-02-03	11	19.4	2021-04-09	4	9.28571	21.4			I3	0.103093		0
45	I	4	399641	2021-02-03	21	18.7	2021-04-09	4	9.28571	18.4			I4	-0.0160428		0
46	J	0	399642	2021-02-03	VHL	19.1	2021-04-09	4	9.28571	19.6			J0	0.026178		0
47	J	1	399643	2021-02-03	1	20.5	2021-04-09	4	9.28571	20.5			J1	0		0
48	J	2	399644	2021-02-03	VHL	20.9	2021-04-09	4	9.28571	22			J2	0.0526316		0
49	J	3	399645	2021-02-03	FG	21.1	2021-04-09	4	9.28571	22.2			J3	0.0521327		0
50	J	4	399646	2021-02-03	5	20.9	2021-04-09	4	9.28571	21.6			J4	0.0334928		0
51	K	0	399647	2021-02-03	DF	19.2	2021-04-09	4	9.28571	19.5			K0	0.015625		0
52	K	1	399648	2021-02-03	DF	20.9	2021-04-09	4	9.28571	21			K1	0.00478469		0
53	K	2	399649	2021-02-03	21	19.9	2021-04-09	4	9.28571	20.1			K2	0.0100503		0
54	K	3	399650	2021-02-03	FIH?	20.7	2021-04-09	4	9.28571	21.5			K3	0.0386473		0
55	K	4	399651	2021-02-03	VHL?	17.3	2021-04-09	4	9.28571	17.9			K4	0.0346821		0
56	L	0	399652	2021-02-03	DF	19.9	2021-04-09	4	9.28571	20			L0	0.00502513		0
57	L	1	399653	2021-02-03	FG	21.4	2021-04-09	4	9.28571	21			L1	-0.0186916		0
58	L	2	399654	2021-02-03	DF	20.1	2021-04-09	4	9.28571	21			L2	0.0447761		0
59	L	3	399655	2021-02-03	DF	19.1	2021-04-09	4	9.28571	19.9			L3	0.0418848		0
60	L	4	399656	2021-02-03	FG	19.8	2021-04-09	4	9.28571	22.5			L4	0.136364		0
61	M	0	399657	2021-02-03	VHL	18.6	2021-04-09	4	9.28571	18.8			M0	0.0107527		0
62	M	1	399658	2021-02-03	21	16.8	2021-04-09	4	9.28571	17.3			M1	0.0297619		0
63	M	2	399659	2021-02-03	21	19.8	2021-04-09	4	9.28571	20			M2	0.010101		0
64	M	3	399660	2021-02-03	VHL	21.5	2021-04-09	4	9.28571	22.5			M3	0.0465116		0
65	M	4	399661	2021-02-03	VHL	18.3	2021-04-09	4	9.28571	18.6			M4	0.0163934		0
66	N	0	399662	2021-02-03	NOT	19.5	2021-04-09	4	9.28571	19.9			N0	0.0205128		0
67	N	1	399663	2021-02-03	FIH	20.9	2021-04-09	4	9.28571	20.5			N1	-0.0191388		0
68	N	2	399664	2021-02-03	VHL	19.6	2021-04-09	4	9.28571	19.6			N2	0		0
69	N	3	399665	2021-02-03	5	18.7	2021-04-09	4	9.28571	19.6			N3	0.0481283		0
70	N	4	399666	2021-02-03	VHL	19.1	2021-04-09	4	9.28571	20			N4	0.0471204		0
71	O	0	399667	2021-02-03	FG	17.5	2021-04-09	4	9.28571	18.3			O0	0.0457143		0
72	O	1	399668	2021-02-03	NOT	21	2021-04-09	4	9.28571	20.4			O1	-0.0285714		0
73	O	2	399669	2021-02-03	FIH	19	2021-04-09	4	9.28571	20.1			O2	0.0578947		0
74	O	3	399670	2021-02-03	FIH	17	2021-04-09	4	9.28571	17.7			O3	0.0411765		0
75	O	4	399671	2021-02-03	1	20.3	2021-04-09	4	9.28571	19			O4	-0.0640394		0
76	P	1	399672	2021-02-03		18.7	2021-04-09	4	9.28571	19.1			P0	0.0213904		0
77	P	2	399673	2021-02-03	5	19.5	2021-04-09	4	9.28571	19.9			P1	0.0205128		0
78	P	3	399674	2021-02-03	5	18.7	2021-04-09	4	9.28571	20.2			P2	0.0802139		0
79	P	4	399675	2021-02-03	FIH	19.6	2021-04-09	4	9.28571	20.5			P3	0.0459184		0
80	P	5	399676	2021-02-03	1	19.8	2021-04-09	4	9.28571	21.2			P4	0.0707071		0
								-44291
1	A	0	399597	2021-02-03	NoT	18.5	2021-04-12	7	9.71429	18.7	4.2	3.6	A0	0.0108108	27.216	27.216
2	A	1	399598	2021-02-03	21	19.9	2021-04-12	7	9.71429	18	2.8	2.8	A1	-0.0954774	10.976	10.976
3	A	2	399599	2021-02-03	DF	20.8	2021-04-12	7	9.71429	19.4	7.1	3.3	A2	-0.0673077	38.6595	38.6595
4	A	3	399600	2021-02-03	FG	19	2021-04-12	7	9.71429	17.5	4.4	3.4	A3	-0.0789474	25.432	25.432
5	A	4	399601	2021-02-03	21	18.5	2021-04-12	7	9.71429	18.4	2.6	2.2	A4	-0.00540541	6.292	6.292
6							2021-04-12	7
7	B	1	399603	2021-02-03	FIH	18.7	2021-04-12	7	9.71429	18.2	6.2	3.2	B1	-0.026738	31.744	31.744
8	B	2	399604	2021-02-03	5	19	2021-04-12	7	9.71429	18.2	2.3	2.3	B2	-0.0421053	6.0835	6.0835
9	B	3	399605	2021-02-03	FG	21.2	2021-04-12	7	9.71429	20.9	5.4	4.6	B3	-0.0141509	57.132	f
10	B	4	399606	2021-02-03	FIH	21.2	2021-04-12	7	9.71429	20.2	4.2	2.3	B4	-0.0471698	11.109	11.109
11	C	0	399607	2021-02-03	DF	19.4	2021-04-12	7	9.71429	19	3.4	3.4	C0	-0.0206186	19.652	26.564	6.912	2.4	2.4
12	C	1	399608	2021-02-03	DF	19.8	2021-04-12	7	9.71429	18.9	2.4	2.4	C1	-0.0454545	6.912	6.912
13	C	2	399609	2021-02-03	FG	19.8	2021-04-12	7	9.71429	18.8	2.3	2.3	C2	-0.0505051	6.0835	f
14	C	3	399610	2021-02-03	DF	19.5	2021-04-12	7	9.71429	18.6	5.7	2.9	C3	-0.0461538	23.9685	23.9685
15	C	4	399611	2021-02-03	1	20.1	2021-04-12	7	9.71429	19.6	5.3	2.8	C4	-0.0248756	20.776	20.776
16	D	0	399612	2021-02-03	21	18.6	2021-04-12	7	9.71429	19.1	0	0	D0	0.0268817	0	f
17	D	1	399613	2021-02-03	5	20.4	2021-04-12	7	9.71429	20.4	4.9	2.9	D1	0	20.6045	20.6045
18	D	2	399614	2021-02-03	1	18.8	2021-04-12	7	9.71429	18.2	11.1	3.1	D2	-0.0319149	53.3355	53.3355
19	D	3	399615	2021-02-03	5	21.1	2021-04-12	7	9.71429	21.1	4.4	3.9	D3	0	33.462	33.462
20	D	4	399616	2021-02-03	1	18.8	2021-04-12	7	9.71429	19.4	5.5	3	D4	0.0319149	24.75	24.75
21	E	0	399617	2021-02-03	21	19.6	2021-04-12	7	9.71429	19.9	2.7	2.7	E0	0.0153061	9.8415	9.8415
22	E	1	399618	2021-02-03	21	20.3	2021-04-12	7	9.71429	20.9	6.4	3.2	E1	0.0295567	32.768	32.768
23	E	2	399619	2021-02-03	21	18.4	2021-04-12	7	9.71429	18	5.3	3.5	E2	-0.0217391	32.4625	32.4625
24	E	3	399620	2021-02-03	5	21.1	2021-04-12	7	9.71429	19.5	4.5	2.8	E3	-0.0758294	17.64	f
25	E	4	399621	2021-02-03	FIH	18	2021-04-12	7	9.71429	18.1	0	0	E4	0.00555556	0	0
26	F	0	399622	2021-02-03	NoT	18.7	2021-04-12	7	9.71429	19.8	2.9	2.9	F0	0.0588235	12.1945	12.1945
27	F	1	399623	2021-02-03	FG	19.3	2021-04-12	7	9.71429	19.4	7.9	4.6	F1	0.00518135	83.582	f
28	F	2	399624	2021-02-03	1	19.4	2021-04-12	7	9.71429	19.8	0	0	F2	0.0206186	0	0					IP?
29	F	3	399625	2021-02-03	1	20.5	2021-04-12	7	9.71429	19.7	4.8	3.2	F3	-0.0390244	24.576	24.576
30	F	4	399626	2021-02-03	NoT	21.4	2021-04-12	7	9.71429	21.6	6	3.4	F4	0.00934579	34.68	f
31							2021-04-12	7
32	G	1	399628	2021-02-03	5	21.2	2021-04-12	7	9.71429	20.6	4.8	3.7	G1	-0.0283019	32.856	32.856
33	G	2	399629	2021-02-03	5	18.5	2021-04-12	7	9.71429	17.9	7.3	4.5	G2	-0.0324324	73.9125	73.9125
34	G	3	399630	2021-02-03	VHL	21	2021-04-12	7	9.71429	20.1	2.5	2.5	G3	-0.0428571	7.8125	7.8125
35	G	4	399631	2021-02-03	FG	19.1	2021-04-12	7	9.71429	18.7	6	2.5	G4	-0.0209424	18.75	18.75
36	H	0	399632	2021-02-03	1	19.7	2021-04-12	7	9.71429	18.6	4.5	2.1	H0	-0.0558376	9.9225	9.9225
37	H	1	399633	2021-02-03	NoT	20.8	2021-04-12	7	9.71429	20.4	4.3	4.3	H1	-0.0192308	39.7535	39.7535
38	H	2	399634	2021-02-03	FG	19	2021-04-12	7	9.71429	18.6	4.2	3.6	H2	-0.0210526	27.216	27.216
39	H	3	399635	2021-02-03	VHL	20.4	2021-04-12	7	9.71429	19.6	2.2	2.2	H3	-0.0392157	5.324	5.324
40	H	4	399636	2021-02-03	FG	19	2021-04-12	7	9.71429	18.9	3.4	3.4	H4	-0.00526316	19.652	19.652
41	I	0	399637	2021-02-03	NoT	20.4	2021-04-12	7	9.71429	18.8	4	2.8	I0	-0.0784314	15.68	15.68
42	I	1	399638	2021-02-03	DIH	19.8	2021-04-12	7	9.71429	18.7	6.2	2.2	I1	-0.0555556	15.004	15.004
43	I	2	399639	2021-02-03	DIH	19.6	2021-04-12	7	9.71429	20	5.6	3.3	I2	0.0204082	30.492	30.492
44	I	3	399640	2021-02-03	11	19.4	2021-04-12	7	9.71429	20.1	3.2	2.9	I3	0.0360825	13.456	13.456
45	I	4	399641	2021-02-03	21	18.7	2021-04-12	7	9.71429	18.2	3.7	1.8	I4	-0.026738	5.994	5.994
46	J	0	399642	2021-02-03	VHL	19.1	2021-04-12	7	9.71429	18.9	5.1	3.4	J0	-0.0104712	29.478	29.478
47	J	1	399643	2021-02-03	1	20.5	2021-04-12	7	9.71429	19.9	4.8	4	J1	-0.0292683	38.4	38.4
48	J	2	399644	2021-02-03	VHL	20.9	2021-04-12	7	9.71429	21.1	3.6	3.3	J2	0.00956938	19.602	19.602
49	J	3	399645	2021-02-03	FG	21.1	2021-04-12	7	9.71429	21.2	2.4	2.4	J3	0.00473934	6.912	f
50	J	4	399646	2021-02-03	5	20.9	2021-04-12	7	9.71429	21.1	4.3	3.9	J4	0.00956938	32.7015	32.7015
51	K	0	399647	2021-02-03	DF	19.2	2021-04-12	7	9.71429	19	4.2	2.9	K0	-0.0104167	17.661	f
52	K	1	399648	2021-02-03	DF	20.9	2021-04-12	7	9.71429	19.6	7.6	3.2	K1	-0.062201	38.912	38.912
53	K	2	399649	2021-02-03	21	19.9	2021-04-12	7	9.71429	19.3	0	0	K2	-0.0301508	0	0
54	K	3	399650	2021-02-03	FIH?	20.7	2021-04-12	7	9.71429	20.9	0	0	K3	0.00966184	0	0
55	K	4	399651	2021-02-03	VHL?	17.3	2021-04-12	7	9.71429	16	4.3	2.9	K4	-0.0751445	18.0815	18.0815
56	L	0	399652	2021-02-03	DF	19.9	2021-04-12	7	9.71429	19.6	5.7	5.7	L0	-0.0150754	92.5965	92.5965
57	L	1	399653	2021-02-03	FG	21.4	2021-04-12	7	9.71429	20.5	5.3	4.7	L1	-0.0420561	58.5385	58.5385
58	L	2	399654	2021-02-03	DF	20.1	2021-04-12	7	9.71429	19.1	6.7	3.6	L2	-0.0497512	43.416	43.416
59	L	3	399655	2021-02-03	DF	19.1	2021-04-12	7	9.71429	18.6	2.1	2.1	L3	-0.026178	4.6305	4.6305
60	L	4	399656	2021-02-03	FG	19.8	2021-04-12	7	9.71429	20.7	5.5	3.5	L4	0.0454545	33.6875	33.6875
61	M	0	399657	2021-02-03	VHL	18.6	2021-04-12	7	9.71429	18.8	4.9	2.8	M0	0.0107527	19.208	19.208
62	M	1	399658	2021-02-03	21	16.8	2021-04-12	7	9.71429	16.5	5.5	5.3	M1	-0.0178571	77.2475	77.2475
63	M	2	399659	2021-02-03	21	19.8	2021-04-12	7	9.71429	18.8	3.1	2.9	M2	-0.0505051	13.0355	13.0355
64	M	3	399660	2021-02-03	VHL	21.5	2021-04-12	7	9.71429	20.2	5	3.8	M3	-0.0604651	36.1	36.1
65	M	4	399661	2021-02-03	VHL	18.3	2021-04-12	7	9.71429	18.2	4.7	4.6	M4	-0.00546448	49.726	49.726
66	N	0	399662	2021-02-03	NOT	19.5	2021-04-12	7	9.71429	19.2	5.7	3.2	N0	-0.0153846	29.184	29.184
67	N	1	399663	2021-02-03	FIH	20.9	2021-04-12	7	9.71429	20.1	4.1	3.2	N1	-0.0382775	20.992	20.992
68	N	2	399664	2021-02-03	VHL	19.6	2021-04-12	7	9.71429	18.5	6.1	4.4	N2	-0.0561224	59.048	59.048
69	N	3	399665	2021-02-03	5	18.7	2021-04-12	7	9.71429	18	3.5	2.8	N3	-0.0374332	13.72	13.72
70	N	4	399666	2021-02-03	VHL	19.1	2021-04-12	7	9.71429	19.8	5.6	4.3	N4	0.0366492	51.772	51.772
71	O	0	399667	2021-02-03	FG	17.5	2021-04-12	7	9.71429	17.3	6.6	2.8	O0	-0.0114286	25.872	25.872
72	O	1	399668	2021-02-03	NOT	21	2021-04-12	7	9.71429	20.1	3	3	O1	-0.0428571	13.5	13.5
73	O	2	399669	2021-02-03	FIH	19	2021-04-12	7	9.71429	19.5	6.5	3.4	O2	0.0263158	37.57	f
74	O	3	399670	2021-02-03	FIH	17	2021-04-12	7	9.71429	16.6	4	3.8	O3	-0.0235294	28.88	28.88
75	O	4	399671	2021-02-03	1	20.3	2021-04-12	7	9.71429	17.9	4.2	2.7	O4	-0.118227	15.309	15.309
76							2021-04-12	7
77	P	2	1	2021-02-03	5	19.5	2021-04-12	7	9.71429	19.8	7.2	4	P1	0.0153846	57.6	57.6
78	P	3	2	2021-02-03	5	18.7	2021-04-12	7	9.71429	19.4	0	0	P2	0.0374332	0	0
79	P	4	3	2021-02-03	FIH	19.6	2021-04-12	7	9.71429	18.7	4.1	3.4	P3	-0.0459184	23.698	23.698
80	P	5	4	2021-02-03	1	19.8	2021-04-12	7	9.71429	20.2	3.7	1.8	P4	0.020202	5.994	5.994
								-44291
1	A	0	399597	2021-02-03	NoT	18.5	2021-04-14	9	10	17.9	4.4	3.5	A0	-0.0324324	26.95	26.95
2	A	1	399598	2021-02-03	21	19.9	2021-04-14	9	10	17.9	3.4	2.4	A1	-0.100503	9.792	23.292	13.5	3	3
3	A	2	399599	2021-02-03	DF	20.8	2021-04-14	9	10	18.5	6.9	3.9	A2	-0.110577	52.4745	52.4745
4	A	3	399600	2021-02-03	FG	19	2021-04-14	9	10	17.5	5.8	3.9	A3	-0.0789474	44.109	44.109
5	A	4	399601	2021-02-03	21	18.5	2021-04-14	9	10	18.3	7.2	3.7	A4	-0.0108108	49.284	49.284
6							2021-04-14	9
7	B	1	399603	2021-02-03	FIH	18.7	2021-04-14	9	10	18.6	7	4.6	B1	-0.00534759	74.06	74.06
8	B	2	399604	2021-02-03	5	19	2021-04-14	9	10	14.4	5.1	3.6	B2	-0.242105	33.048	33.048
9	B	3	399605	2021-02-03	FG	21.2	2021-04-14	9	10	20.8	5.5	5.5	B3	-0.0188679	83.1875	83.1875
10	B	4	399606	2021-02-03	FIH	21.2	2021-04-14	9	10	19.2	3.1	2.7	B4	-0.0943396	11.2995	11.2995
11	C	0	399607	2021-02-03	DF	19.4	2021-04-14	9	10	18	2.6	2.6	C0	-0.0721649	8.788	8.788
12	C	1	399608	2021-02-03	DF	19.8	2021-04-14	9	10	17.6	4	3	C1	-0.111111	18	30.1945	12.1945	2.9	2.9
13	C	2	399609	2021-02-03	FG	19.8	2021-04-14	9	10	18.4	0	0	C2	-0.0707071	0	f
14	C	3	399610	2021-02-03	DF	19.5	2021-04-14	9	10	18.4	7.6	3	C3	-0.0564103	34.2	34.2
15	C	4	399611	2021-02-03	1	20.1	2021-04-14	9	10	19.1	10.4	3.3	C4	-0.0497512	56.628	56.628
16	D	0	399612	2021-02-03	21	18.6	2021-04-14	9	10	17.8	5.3	3.4	D0	-0.0430108	30.634	30.634
17	D	1	399613	2021-02-03	5	20.4	2021-04-14	9	10	19.2	5.6	2.5	D1	-0.0588235	17.5	17.5
18	D	2	399614	2021-02-03	1	18.8	2021-04-14	9	10	16.5	6.3	4.2	D2	-0.12234	55.566	55.566
19	D	3	399615	2021-02-03	5	21.1	2021-04-14	9	10	20.2	4.6	3.9	D3	-0.042654	34.983	34.983
20	D	4	399616	2021-02-03	1	18.8	2021-04-14	9	10	18.6	6.1	2.9	D4	-0.0106383	25.6505	25.6505
21	E	0	399617	2021-02-03	21	19.6	2021-04-14	9	10	18.9	6.7	4	E0	-0.0357143	53.6	53.6
22	E	1	399618	2021-02-03	21	20.3	2021-04-14	9	10	20.5	7.6	5	E1	0.00985222	95	95
23	E	2	399619	2021-02-03	21	18.4	2021-04-14	9	10	18	5.6	3.6	E2	-0.0217391	36.288	36.288
24	E	3	399620	2021-02-03	5	21.1	2021-04-14	9	10	18.5	3.3	2.3	E3	-0.123223	8.7285	8.7285
25	E	4	399621	2021-02-03	FIH	18	2021-04-14	9	10	17.8	7.1	3.9	E4	-0.0111111	53.9955	53.9955
26	F	0	399622	2021-02-03	NoT	18.7	2021-04-14	9	10	19.2	3.4	3.4	F0	0.026738	19.652	19.652
27	F	1	399623	2021-02-03	FG	19.3	2021-04-14	9	10	19	10.5	4.7	F1	-0.015544	115.973	115.973
28	F	2	399624	2021-02-03	1	19.4	2021-04-14	9	10	20.6	7.4	1.6	F2	0.0618557	9.472	f					IP?
29	F	3	399625	2021-02-03	1	20.5	2021-04-14	9	10	19.5	4.8	3.3	F3	-0.0487805	26.136	26.136
30	F	4	399626	2021-02-03	NoT	21.4	2021-04-14	9	10	21.3	7.4	4.5	F4	-0.0046729	74.925	f
31							2021-04-14	9
32	G	1	399628	2021-02-03	5	21.2	2021-04-14	9	10	20.2	4.3	3.7	G1	-0.0471698	29.4335	29.4335
33	G	2	399629	2021-02-03	5	18.5	2021-04-14	9	10	17.9	7.1	5.2	G2	-0.0324324	95.992	95.992
34	G	3	399630	2021-02-03	VHL	21	2021-04-14	9	10	20	3.2	3.2	G3	-0.047619	16.384	16.384
35	G	4	399631	2021-02-03	FG	19.1	2021-04-14	9	10	17.8	4.4	2.6	G4	-0.0680628	14.872	14.872
36	H	0	399632	2021-02-03	1	19.7	2021-04-14	9	10	18.3	5.2	2.6	H0	-0.071066	17.576	17.576
37	H	1	399633	2021-02-03	NoT	20.8	2021-04-14	9	10	19.7	4.5	2.9	H1	-0.0528846	18.9225	18.9225
38	H	2	399634	2021-02-03	FG	19	2021-04-14	9	10	17.9	4.8	3.9	H2	-0.0578947	36.504	36.504
39	H	3	399635	2021-02-03	VHL	20.4	2021-04-14	9	10	19.4	3.2	2.2	H3	-0.0490196	7.744	7.744
40	H	4	399636	2021-02-03	FG	19	2021-04-14	9	10	18.3	3.4	2.1	H4	-0.0368421	7.497	7.497
41	I	0	399637	2021-02-03	NoT	20.4	2021-04-14	9	10	19.1	4.7	2.5	I0	-0.0637255	14.6875	14.6875
42	I	1	399638	2021-02-03	DIH	19.8	2021-04-14	9	10	18.6	4.5	2	I1	-0.0606061	9	9
43	I	2	399639	2021-02-03	DIH	19.6	2021-04-14	9	10	19	5.6	3.9	I2	-0.0306122	42.588	42.588
44	I	3	399640	2021-02-03	11	19.4	2021-04-14	9	10	19.4	3.9	3.5	I3	0	23.8875	23.8875
45	I	4	399641	2021-02-03	21	18.7	2021-04-14	9	10	17.5	9.7	2.9	I4	-0.0641711	40.7885	f
46	J	0	399642	2021-02-03	VHL	19.1	2021-04-14	9	10	18.6	4.2	2.9	J0	-0.026178	17.661	17.661
47	J	1	399643	2021-02-03	1	20.5	2021-04-14	9	10	19.1	5.4	3.8	J1	-0.0682927	38.988	53.8835	14.8955	3.1	3.1
48	J	2	399644	2021-02-03	VHL	20.9	2021-04-14	9	10	20.8	4	3.7	J2	-0.00478469	27.38	27.38
49	J	3	399645	2021-02-03	FG	21.1	2021-04-14	9	10	20.9	2.5	2.5	J3	-0.00947867	7.8125	7.8125
50	J	4	399646	2021-02-03	5	20.9	2021-04-14	9	10	20.1	4.9	3.2	J4	-0.0382775	25.088	25.088
51	K	0	399647	2021-02-03	DF	19.2	2021-04-14	9	10	18.5	5.4	3.3	K0	-0.0364583	29.403	29.403
52	K	1	399648	2021-02-03	DF	20.9	2021-04-14	9	10	19.1	6.1	2.9	K1	-0.0861244	25.6505	25.6505
53	K	2	399649	2021-02-03	21	19.9	2021-04-14	9	10	19.1	2.2	2.2	K2	-0.040201	5.324	f
54	K	3	399650	2021-02-03	FIH?	20.7	2021-04-14	9	10	20.7	2.5	2.5	K3	0	7.8125	7.8125
55	K	4	399651	2021-02-03	VHL?	17.3	2021-04-14	9	10	16.6	3.7	3.3	K4	-0.0404624	20.1465	20.1465
56	L	0	399652	2021-02-03	DF	19.9	2021-04-14	9	10	18.8	6.1	4.3	L0	-0.0552764	56.3945	56.3945
57	L	1	399653	2021-02-03	FG	21.4	2021-04-14	9	10	20.7	6.6	4.9	L1	-0.0327103	79.233	79.233
58	L	2	399654	2021-02-03	DF	20.1	2021-04-14	9	10	18.1	7.9	4.1	L2	-0.0995025	66.3995	66.3995
59	L	3	399655	2021-02-03	DF	19.1	2021-04-14	9	10	18.6	2.3	2.3	L3	-0.026178	6.0835	6.0835
60	L	4	399656	2021-02-03	FG	19.8	2021-04-14	9	10	19.9	6.5	4.3	L4	0.00505051	60.0925	60.0925
61	M	0	399657	2021-02-03	VHL	18.6	2021-04-14	9	10	17.6	4.9	2.8	M0	-0.0537634	19.208	19.208
62	M	1	399658	2021-02-03	21	16.8	2021-04-14	9	10	19.6	7.6	5.5	M1	0.166667	114.95	114.95
63	M	2	399659	2021-02-03	21	19.8	2021-04-14	9	10	18.7	2.6	2.6	M2	-0.0555556	8.788	8.788
64	M	3	399660	2021-02-03	VHL	21.5	2021-04-14	9	10	19.7	7.1	5.3	M3	-0.0837209	99.7195	116.103	16.384	3.2	3.2
65	M	4	399661	2021-02-03	VHL	18.3	2021-04-14	9	10	18	5.2	4.7	M4	-0.0163934	57.434	57.434
66	N	0	399662	2021-02-03	NOT	19.5	2021-04-14	9	10	19.3	6.3	4.4	N0	-0.0102564	60.984	60.984
67	N	1	399663	2021-02-03	FIH	20.9	2021-04-14	9	10	19	4.3	3.1	N1	-0.0909091	20.6615	87.4775	66.816	5.8	4.8
68	N	2	399664	2021-02-03	VHL	19.6	2021-04-14	9	10	18.2	6.3	4.6	N2	-0.0714286	66.654	66.654
69	N	3	399665	2021-02-03	5	18.7	2021-04-14	9	10	18.2	3.7	2.8	N3	-0.026738	14.504	f
70	N	4	399666	2021-02-03	VHL	19.1	2021-04-14	9	10	19.1	7.4	5.1	N4	0	96.237	96.237
71	O	0	399667	2021-02-03	FG	17.5	2021-04-14	9	10	16.8	8.6	2.7	O0	-0.04	31.347	31.347
72	O	1	399668	2021-02-03	NOT	21	2021-04-14	9	10	20.5	5.3	3.4	O1	-0.0238095	30.634	f
73	O	2	399669	2021-02-03	FIH	19	2021-04-14	9	10	19.2	5.5	3.7	O2	0.0105263	37.6475	37.6475
74	O	3	399670	2021-02-03	FIH	17	2021-04-14	9	10	16.9	4.4	4.1	O3	-0.00588235	36.982	36.982
75	O	4	399671	2021-02-03	1	20.3	2021-04-14	9	10	18.9	8.4	2.5	O4	-0.0689655	26.25	26.25
76							2021-04-14	9
77	P	2	1	2021-02-03	5	19.5	2021-04-14	9	10	15.5	5	4.5	P1	-0.205128	50.625	50.625
78	P	3	2	2021-02-03	5	18.7	2021-04-14	9	10	19	6.5	3.4	P2	0.0160428	37.57	f
79	P	4	3	2021-02-03	FIH	19.6	2021-04-14	9	10	18.8	4.6	3.8	P3	-0.0408163	33.212	f
80	P	5	4	2021-02-03	1	19.8	2021-04-14	9	10	19.8	3.1	3.1	P4	0	14.8955	14.8955
								-44291
1	A	0	399597	2021-02-03	NoT	18.5	2021-04-16	11	10.2857	18.3	5.5	4	A0	-0.0108108	44	44
2	A	1	399598	2021-02-03	21	19.9	2021-04-16	11	10.2857	18.1	3.3	3.1	A1	-0.0904523	15.8565	31.8355	15.979	3.8	2.9
3	A	2	399599	2021-02-03	DF	20.8	2021-04-16	11	10.2857	19	7.6	4.4	A2	-0.0865385	73.568	73.568
4	A	3	399600	2021-02-03	FG	19	2021-04-16	11	10.2857	17.3	5.5	4.4	A3	-0.0894737	53.24	53.24
5	A	4	399601	2021-02-03	21	18.5	2021-04-16	11	10.2857	18	6.1	4.1	A4	-0.027027	51.2705	51.2705
6							2021-04-16	11
7	B	1	399603	2021-02-03	FIH	18.7	2021-04-16	11	10.2857	18.2	5.7	4.8	B1	-0.026738	65.664	65.664
6							2021-04-16	11
9	B	3	399605	2021-02-03	FG	21.2	2021-04-16	11	10.2857	20.5	7.8	5.4	B3	-0.0330189	113.724	113.724
10	B	4	399606	2021-02-03	FIH	21.2	2021-04-16	11	10.2857	19.6	6.2	3.6	B4	-0.0754717	40.176	40.176
11	C	0	399607	2021-02-03	DF	19.4	2021-04-16	11	10.2857	19.3	3.3	2.4	C0	-0.00515464	9.504	9.504
12	C	1	399608	2021-02-03	DF	19.8	2021-04-16	11	10.2857	18.1	3.7	2.7	C1	-0.0858586	13.4865	25.681	12.1945	2.9	2.9
13	C	2	399609	2021-02-03	FG	19.8	2021-04-16	11	10.2857	18.1			C2	-0.0858586	0	f
14	C	3	399610	2021-02-03	DF	19.5	2021-04-16	11	10.2857	18.3	7.4	3.9	C3	-0.0615385	56.277	88.277	32	4	4
15	C	4	399611	2021-02-03	1	20.1	2021-04-16	11	10.2857	19.6	5.1	4	C4	-0.0248756	40.8	81.867	41.067	5.4	3.9
16	D	0	399612	2021-02-03	21	18.6	2021-04-16	11	10.2857	18.8	7.1	5.2	D0	0.0107527	95.992	f
17	D	1	399613	2021-02-03	5	20.4	2021-04-16	11	10.2857	19.1	6.1	2.7	D1	-0.0637255	22.2345	22.2345
18	D	2	399614	2021-02-03	1	18.8	2021-04-16	11	10.2857	17.7	7.6	3.7	D2	-0.0585106	52.022	52.022
19	D	3	399615	2021-02-03	5	21.1	2021-04-16	11	10.2857	20	4.1	3.4	D3	-0.0521327	23.698	23.698
20	D	4	399616	2021-02-03	1	18.8	2021-04-16	11	10.2857	18.7	7.6	3	D4	-0.00531915	34.2	34.2
21	E	0	399617	2021-02-03	21	19.6	2021-04-16	11	10.2857	19.9	5.9	4.2	E0	0.0153061	52.038	66.9335	14.8955	3.1	3.1
22	E	1	399618	2021-02-03	21	20.3	2021-04-16	11	10.2857	19.9	7.5	4.5	E1	-0.0197044	75.9375	75.9375
23	E	2	399619	2021-02-03	21	18.4	2021-04-16	11	10.2857	18.2	8.6	3.6	E2	-0.0108696	55.728	55.728
24	E	3	399620	2021-02-03	5	21.1	2021-04-16	11	10.2857	19.2	2.7	2.6	E3	-0.0900474	9.126	9.126
25	E	4	399621	2021-02-03	FIH	18	2021-04-16	11	10.2857	17.5	6.7	3.8	E4	-0.0277778	48.374	48.374
26	F	0	399622	2021-02-03	NoT	18.7	2021-04-16	11	10.2857		3.8	3.8	F0		27.436	27.436	0
27	F	1	399623	2021-02-03	FG	19.3	2021-04-16	11	10.2857	19.3	10.5	6.6	F1	0	228.69	228.69
28	F	2	399624	2021-02-03	1	19.4	2021-04-16	11	10.2857	19.6	8.7	2	F2	0.0103093	17.4	f					IP?
29	F	3	399625	2021-02-03	1	20.5	2021-04-16	11	10.2857	19.2	5	4.3	F3	-0.0634146	46.225	80.525	34.3	5.6	3.5
30	F	4	399626	2021-02-03	NoT	21.4	2021-04-16	11	10.2857	20.7	7.4	4.7	F4	-0.0327103	81.733	f
31							2021-04-16	11
32	G	1	399628	2021-02-03	5	21.2	2021-04-16	11	10.2857	20.1	4.4	3.8	G1	-0.0518868	31.768	31.768
33	G	2	399629	2021-02-03	5	18.5	2021-04-16	11	10.2857	18.3	7.6	6.1	G2	-0.0108108	141.398	141.398
34	G	3	399630	2021-02-03	VHL	21	2021-04-16	11	10.2857	20.4	4.6	3.3	G3	-0.0285714	25.047	25.047
35	G	4	399631	2021-02-03	FG	19.1	2021-04-16	11	10.2857	18.5	5.7	3.5	G4	-0.0314136	34.9125	34.9125
36	H	0	399632	2021-02-03	1	19.7	2021-04-16	11	10.2857	18.6	6.9	2.9	H0	-0.0558376	29.0145	f
37	H	1	399633	2021-02-03	NoT	20.8	2021-04-16	11	10.2857	20.2	4.8	3.1	H1	-0.0288462	23.064	23.064
38	H	2	399634	2021-02-03	FG	19	2021-04-16	11	10.2857	17.9	5.5	4.9	H2	-0.0578947	66.0275	66.0275
39	H	3	399635	2021-02-03	VHL	20.4	2021-04-16	11	10.2857	19.3	8	3.7	H3	-0.0539216	54.76	54.76
40	H	4	399636	2021-02-03	FG	19	2021-04-16	11	10.2857	18.6	10.5	5.6	H4	-0.0210526	164.64	f
41	I	0	399637	2021-02-03	NoT	20.4	2021-04-16	11	10.2857	18.7	4.4	2.9	I0	-0.0833333	18.502	18.502
42	I	1	399638	2021-02-03	DIH	19.8	2021-04-16	11	10.2857	18.9	7.9	2.2	I1	-0.0454545	19.118	19.118
43	I	2	399639	2021-02-03	DIH	19.6	2021-04-16	11	10.2857	19	6.7	4.7	I2	-0.0306122	74.0015	74.0015
44	I	3	399640	2021-02-03	11	19.4	2021-04-16	11	10.2857	20	4.9	3.9	I3	0.0309278	37.2645	37.2645
45	I	4	399641	2021-02-03	21	18.7	2021-04-16	11	10.2857	17.5	7.7	3.7	I4	-0.0641711	52.7065	f
46	J	0	399642	2021-02-03	VHL	19.1	2021-04-16	11	10.2857	19	4.1	3.6	J0	-0.0052356	26.568	26.568
47	J	1	399643	2021-02-03	1	20.5	2021-04-16	11	10.2857	19.3	6	4.7	J1	-0.0585366	66.27	82.654	16.384	3.2	3.2
48	J	2	399644	2021-02-03	VHL	20.9	2021-04-16	11	10.2857	20.3	5.3	4.2	J2	-0.0287081	46.746	46.746
49	J	3	399645	2021-02-03	FG	21.1	2021-04-16	11	10.2857	20.9	2.9	2.9	J3	-0.00947867	12.1945	24.389	12.1945	2.9	2.9
50	J	4	399646	2021-02-03	5	20.9	2021-04-16	11	10.2857	20.2	5.1	4.2	J4	-0.0334928	44.982	44.982
51	K	0	399647	2021-02-03	DF	19.2	2021-04-16	11	10.2857	18.7	4.1	3.2	K0	-0.0260417	20.992	20.992
52	K	1	399648	2021-02-03	DF	20.9	2021-04-16	11	10.2857	18.3	8.9	3.3	K1	-0.124402	48.4605	48.4605
53	K	2	399649	2021-02-03	21	19.9	2021-04-16	11	10.2857	18.7	5.5	3.2	K2	-0.0603015	28.16	f
54	K	3	399650	2021-02-03	FIH?	20.7	2021-04-16	11	10.2857	20.3	8.1	4.7	K3	-0.0193237	89.4645	89.4645
55	K	4	399651	2021-02-03	VHL?	17.3	2021-04-16	11	10.2857	16.5	4.8	3.2	K4	-0.0462428	24.576	24.576
56	L	0	399652	2021-02-03	DF	19.9	2021-04-16	11	10.2857	18.7	6	5.1	L0	-0.0603015	78.03	78.03
57	L	1	399653	2021-02-03	FG	21.4	2021-04-16	11	10.2857	20.7	8.2	6.2	L1	-0.0327103	157.604	157.604
58	L	2	399654	2021-02-03	DF	20.1	2021-04-16	11	10.2857	18.3	8.1	5.2	L2	-0.0895522	109.512	109.512
59	L	3	399655	2021-02-03	DF	19.1	2021-04-16	11	10.2857	18.6	2.8	2.8	L3	-0.026178	10.976	10.976
60	L	4	399656	2021-02-03	FG	19.8	2021-04-16	11	10.2857	20.2	6.5	4.6	L4	0.020202	68.77	68.77
61	M	0	399657	2021-02-03	VHL	18.6	2021-04-16	11	10.2857	18	5	3.2	M0	-0.0322581	25.6	30.2305	4.6305	2.1	2.1
62	M	1	399658	2021-02-03	21	16.8	2021-04-16	11	10.2857	16.3	7.4	5.9	M1	-0.0297619	128.797	128.797
63	M	2	399659	2021-02-03	21	19.8	2021-04-16	11	10.2857	19.1	3.1	3.1	M2	-0.0353535	14.8955	14.8955
64	M	3	399660	2021-02-03	VHL	21.5	2021-04-16	11	10.2857	19.7	6.1	4.8	M3	-0.0837209	70.272	88.774	18.502	4.4	2.9
65	M	4	399661	2021-02-03	VHL	18.3	2021-04-16	11	10.2857	17.9	6.4	4.8	M4	-0.0218579	73.728	73.728
66	N	0	399662	2021-02-03	NOT	19.5	2021-04-16	11	10.2857	18.9	7.5	6	N0	-0.0307692	135	135
67	N	1	399663	2021-02-03	FIH	20.9	2021-04-16	11	10.2857	19.5	5.2	4.9	N1	-0.0669856	62.426	105.018	42.592	4.4	4.4
68	N	2	399664	2021-02-03	VHL	19.6	2021-04-16	11	10.2857	18.9	6.2	5.2	N2	-0.0357143	83.824	83.824
69	N	3	399665	2021-02-03	5	18.7	2021-04-16	11	10.2857	17.9	4.7	3.3	N3	-0.0427807	25.5915	f	17.9685	3.3	3.3
70	N	4	399666	2021-02-03	VHL	19.1	2021-04-16	11	10.2857	18.8	7.2	5.3	N4	-0.0157068	101.124	101.124
71	O	0	399667	2021-02-03	FG	17.5	2021-04-16	11	10.2857	16.8	7	3	O0	-0.04	31.5	31.5
72	O	1	399668	2021-02-03	NOT	21	2021-04-16	11	10.2857	19.9	4.7	3.7	O1	-0.052381	32.1715	f
73	O	2	399669	2021-02-03	FIH	19	2021-04-16	11	10.2857	19.1	6.7	4.8	O2	0.00526316	77.184	77.184
74	O	3	399670	2021-02-03	FIH	17	2021-04-16	11	10.2857	17	5.2	4.4	O3	0	50.336	50.336
75	O	4	399671	2021-02-03	1	20.3	2021-04-16	11	10.2857	18.8	6.8	2.7	O4	-0.0738916	24.786	33.574	8.788	2.6	2.6
76							2021-04-16	11
77	P	2	399673	2021-02-03	5	19.5	2021-04-16	11	10.2857	16.4	5	5	P1	-0.158974	62.5	62.5
78	P	3	399674	2021-02-03	5	18.7	2021-04-16	11	10.2857	19.2	9.2	5	P2	0.026738	115	f
79	P	4	399675	2021-02-03	FIH	19.6	2021-04-16	11	10.2857	19.3	5.6	4.6	P3	-0.0153061	59.248	f
80	P	5	399676	2021-02-03	1	19.8	2021-04-16	11	10.2857	19.3	4.4	4.2	P4	-0.0252525	38.808	38.808
								-44291
1	A	0	399597	2021-02-03	NoT	18.5	2021-04-18	13	10.5714	18.4	6.3	3.8	A0	-0.00540541	45.486	45.486
2	A	1	399598	2021-02-03	21	19.9	2021-04-18	13	10.5714	18.8	3.8	3	A1	-0.0552764	17.1	29.2945	12.1945	2.9	2.9
3	A	2	399599	2021-02-03	DF	20.8	2021-04-18	13	10.5714	19	5	3.6	A2	-0.0865385	32.4	32.4
4	A	3	399600	2021-02-03	FG	19	2021-04-18	13	10.5714	18.6	5.1	3.9	A3	-0.0210526	38.7855	38.7855
5	A	4	399601	2021-02-03	21	18.5	2021-04-18	13	10.5714	19.4	7.4	4.2	A4	0.0486486	65.268	65.268
6							2021-04-18	13
7	B	1	399603	2021-02-03	FIH	18.7	2021-04-18	13	10.5714	19	6.1	3.9	B1	0.0160428	46.3905	46.3905
6							2021-04-18	13
9	B	3	399605	2021-02-03	FG	21.2	2021-04-18	13	10.5714	21.6	5.9	3.9	B3	0.0188679	44.8695	44.8695
10	B	4	399606	2021-02-03	FIH	21.2	2021-04-18	13	10.5714	20.3	5.3	2.1	B4	-0.0424528	11.6865	11.6865
11	C	0	399607	2021-02-03	DF	19.4	2021-04-18	13	10.5714	19	3.2	2.7	C0	-0.0206186	11.664	22.289	10.625	3.4	2.5
12	C	1	399608	2021-02-03	DF	19.8	2021-04-18	13	10.5714	19.3	3	3	C1	-0.0252525	13.5	27.612	14.112	3.6	2.8
13	C	2	399609	2021-02-03	FG	19.8	2021-04-18	13	10.5714	19.2	0	0	C2	-0.030303	0	0
14	C	3	399610	2021-02-03	DF	19.5	2021-04-18	13	10.5714	18.9	6.8	4.1	C3	-0.0307692	57.154	71.0305	13.8765	3.3	2.9
15	C	4	399611	2021-02-03	1	20.1	2021-04-18	13	10.5714	20.4	10.1	4	C4	0.0149254	80.8	80.8	0
16	D	0	399612	2021-02-03	21	18.6	2021-04-18	13	10.5714	20	3.4	2.6	D0	0.0752688	11.492	f
17	D	1	399613	2021-02-03	5	20.4	2021-04-18	13	10.5714	20.8	5.5	2.9	D1	0.0196078	23.1275	23.1275
18	D	2	399614	2021-02-03	1	18.8	2021-04-18	13	10.5714	18.8	6.5	3.2	D2	0	33.28	33.28
19	D	3	399615	2021-02-03	5	21.1	2021-04-18	13	10.5714	20.6	3.5	3.3	D3	-0.0236967	19.0575	19.0575
20	D	4	399616	2021-02-03	1	18.8	2021-04-18	13	10.5714	19.3	6.8	2.8	D4	0.0265957	26.656	26.656
21	E	0	399617	2021-02-03	21	19.6	2021-04-18	13	10.5714	19.9	6.4	4.2	E0	0.0153061	56.448	65.236	8.788	2.6	2.6
22	E	1	399618	2021-02-03	21	20.3	2021-04-18	13	10.5714	20.7	8.5	5	E1	0.0197044	106.25	106.25
23	E	2	399619	2021-02-03	21	18.4	2021-04-18	13	10.5714	18.4	6.2	3.2	E2	0	31.744	31.744
24	E	3	399620	2021-02-03	5	21.1	2021-04-18	13	10.5714	19.9	2.1	2.1	E3	-0.056872	4.6305	4.6305
25	E	4	399621	2021-02-03	FIH	18	2021-04-18	13	10.5714	18.8	5	2.4	E4	0.0444444	14.4	14.4
26	F	0	399622	2021-02-03	NoT	18.7	2021-04-18	13	10.5714	20.1	3.6	3.5	F0	0.0748663	22.05	22.05	0
27	F	1	399623	2021-02-03	FG	19.3	2021-04-18	13	10.5714	19.9	11.1	5.4	F1	0.0310881	161.838	161.838
28	F	2	399624	2021-02-03	1	19.4	2021-04-18	13	10.5714	20	5.4	1.8	F2	0.0309278	8.748	f					IP?
29	F	3	399625	2021-02-03	1	20.5	2021-04-18	13	10.5714	20.2	4.6	4	F3	-0.0146341	36.8	59.3	22.5	5	3
30	F	4	399626	2021-02-03	NoT	21.4	2021-04-18	13	10.5714	21.6	6.7	4.4	F4	0.00934579	64.856	64.856
31							2021-04-18	13
32	G	1	399628	2021-02-03	5	21.2	2021-04-18	13	10.5714	21.2	4.7	3.4	G1	0	27.166	27.166
33	G	2	399629	2021-02-03	5	18.5	2021-04-18	13	10.5714	18.7	6.9	5.2	G2	0.0108108	93.288	93.288
34	G	3	399630	2021-02-03	VHL	21	2021-04-18	13	10.5714	21.1	8.3	2.9	G3	0.0047619	34.9015	34.9015
35	G	4	399631	2021-02-03	FG	19.1	2021-04-18	13	10.5714	19.2	5.3	2.9	G4	0.0052356	22.2865	22.2865
36	H	0	399632	2021-02-03	1	19.7	2021-04-18	13	10.5714	19.4	7.9	2.7	H0	-0.0152284	28.7955	28.7955
37	H	1	399633	2021-02-03	NoT	20.8	2021-04-18	13	10.5714	21	5.1	3	H1	0.00961538	22.95	37.8455	14.8955	3.1	3.1
38	H	2	399634	2021-02-03	FG	19	2021-04-18	13	10.5714	19.3	4.6	4.6	H2	0.0157895	48.668	48.668
39	H	3	399635	2021-02-03	VHL	20.4	2021-04-18	13	10.5714	20.7	8	4.1	H3	0.0147059	67.24	f
40	H	4	399636	2021-02-03	FG	19	2021-04-18	13	10.5714	18.9	7.5	3.3	H4	-0.00526316	40.8375	40.8375
41	I	0	399637	2021-02-03	NoT	20.4	2021-04-18	13	10.5714	20	3.5	2.8	I0	-0.0196078	13.72	13.72
42	I	1	399638	2021-02-03	DIH	19.8	2021-04-18	13	10.5714	20.4	7.1	2.2	I1	0.030303	17.182	17.182
43	I	2	399639	2021-02-03	DIH	19.6	2021-04-18	13	10.5714	20.2	4.9	3.7	I2	0.0306122	33.5405	f
44	I	3	399640	2021-02-03	11	19.4	2021-04-18	13	10.5714	20.6	5.4	3.3	I3	0.0618557	29.403	29.403
45	I	4	399641	2021-02-03	21	18.7	2021-04-18	13	10.5714	19.2	10.3	4.1	I4	0.026738	86.5715	86.5715
46	J	0	399642	2021-02-03	VHL	19.1	2021-04-18	13	10.5714	20.1	4.3	3.4	J0	0.052356	24.854	24.854
47	J	1	399643	2021-02-03	1	20.5	2021-04-18	13	10.5714	20.8	4.6	3.4	J1	0.0146341	26.588	26.588	0
48	J	2	399644	2021-02-03	VHL	20.9	2021-04-18	13	10.5714	21.2	4.5	4.5	J2	0.0143541	45.5625	45.5625
49	J	3	399645	2021-02-03	FG	21.1	2021-04-18	13	10.5714	21.2	2.5	2.5	J3	0.00473934	7.8125	13.2275	5.415	3	1.9
50	J	4	399646	2021-02-03	5	20.9	2021-04-18	13	10.5714	21.2	4.2	3.7	J4	0.0143541	28.749	28.749
51	K	0	399647	2021-02-03	DF	19.2	2021-04-18	13	10.5714	19.2	3.9	3.1	K0	0	18.7395	18.7395
52	K	1	399648	2021-02-03	DF	20.9	2021-04-18	13	10.5714	20.2	8.5	3.2	K1	-0.0334928	43.52	43.52
53	K	2	399649	2021-02-03	21	19.9	2021-04-18	13	10.5714	20.1	3.8	3.1	K2	0.0100503	18.259	f
54	K	3	399650	2021-02-03	FIH?	20.7	2021-04-18	13	10.5714	21.1	2.4	2.3	K3	0.0193237	6.348	6.348
55	K	4	399651	2021-02-03	VHL?	17.3	2021-04-18	13	10.5714	17.1	3.8	2.9	K4	-0.0115607	15.979	15.979
56	L	0	399652	2021-02-03	DF	19.9	2021-04-18	13	10.5714	19.6	6.1	5.4	L0	-0.0150754	88.938	88.938
57	L	1	399653	2021-02-03	FG	21.4	2021-04-18	13	10.5714	21.2	5.5	4.7	L1	-0.00934579	60.7475	60.7475
58	L	2	399654	2021-02-03	DF	20.1	2021-04-18	13	10.5714	19.8	8.5	4.5	L2	-0.0149254	86.0625	86.0625
59	L	3	399655	2021-02-03	DF	19.1	2021-04-18	13	10.5714	19.7	2.8	2	L3	0.0314136	5.6	5.6
60	L	4	399656	2021-02-03	FG	19.8	2021-04-18	13	10.5714	20.7	6.3	3.9	L4	0.0454545	47.9115	47.9115
61	M	0	399657	2021-02-03	VHL	18.6	2021-04-18	13	10.5714	19.6	4.7	3	M0	0.0537634	21.15	21.15	0
62	M	1	399658	2021-02-03	21	16.8	2021-04-18	13	10.5714	18.3	7.8	7.2	M1	0.0892857	202.176	202.176
63	M	2	399659	2021-02-03	21	19.8	2021-04-18	13	10.5714	19.5	3	2.6	M2	-0.0151515	10.14	10.14
64	M	3	399660	2021-02-03	VHL	21.5	2021-04-18	13	10.5714	20.6	7.2	4.9	M3	-0.0418605	86.436	105.786	19.35	4.3	3
65	M	4	399661	2021-02-03	VHL	18.3	2021-04-18	13	10.5714	18.9	5.6	5	M4	0.0327869	70	70
66	N	0	399662	2021-02-03	NOT	19.5	2021-04-18	13	10.5714	20	7.1	5.2	N0	0.025641	95.992	95.992
67	N	1	399663	2021-02-03	FIH	20.9	2021-04-18	13	10.5714	20.3	5.2	4.2	N1	-0.0287081	45.864	79.798	33.934	4.7	3.8
68	N	2	399664	2021-02-03	VHL	19.6	2021-04-18	13	10.5714	19.6	6.2	5.6	N2	0	97.216	97.216
69	N	3	399665	2021-02-03	5	18.7	2021-04-18	13	10.5714	19	4.3	2.9	N3	0.0160428	18.0815	34.4655	16.384	3.2	3.2
70	N	4	399666	2021-02-03	VHL	19.1	2021-04-18	13	10.5714	20	7.7	5.3	N4	0.0471204	108.147	108.147
71	O	0	399667	2021-02-03	FG	17.5	2021-04-18	13	10.5714	17.9	7.2	3.1	O0	0.0228571	34.596	34.596
72	O	1	399668	2021-02-03	NOT	21	2021-04-18	13	10.5714	21.5	7.6	2.6	O1	0.0238095	25.688	f
73	O	2	399669	2021-02-03	FIH	19	2021-04-18	13	10.5714	20.6	5.6	2.6	O2	0.0842105	18.928	18.928
74	O	3	399670	2021-02-03	FIH	17	2021-04-18	13	10.5714	17.4	6.2	4.3	O3	0.0235294	57.319	57.319
75	O	4	399671	2021-02-03	1	20.3	2021-04-18	13	10.5714	19.6	3.7	2.8	O4	-0.0344828	14.504	31.404	16.9	5	2.6
76							2021-04-18	13
77	P	2	399673	2021-02-03	5	19.5	2021-04-18	13	10.5714	19.2	6.4	3.4	P1	-0.0153846	36.992	36.992
78	P	3	399674	2021-02-03	5	18.7	2021-04-18	13	10.5714	19.5	5.9	2.6	P2	0.0427807	19.942	f
79	P	4	399675	2021-02-03	FIH	19.6	2021-04-18	13	10.5714	19.2	5.2	3.7	P3	-0.0204082	35.594	35.594
80	P	5	399676	2021-02-03	1	19.8	2021-04-18	13	10.5714	20.4	3.5	3	P4	0.030303	15.75	15.75
								-44291
1	A	0	399597	2021-02-03	NoT	18.5	2021-04-19	14	10.7143	18.4	5.5	4.5	A0	-0.00540541	55.6875	55.6875
2	A	1	399598	2021-02-03	21	19.9	2021-04-19	14	10.7143	19	2.5	2.5	A1	-0.0452261	7.8125	15.625	7.8125	2.5	2.5
3	A	2	399599	2021-02-03	DF	20.8	2021-04-19	14	10.7143	19.6	7.6	4.3	A2	-0.0576923	70.262	70.262
4	A	3	399600	2021-02-03	FG	19	2021-04-19	14	10.7143	18.7	4.9	3.6	A3	-0.0157895	31.752	31.752
5	A	4	399601	2021-02-03	21	18.5	2021-04-19	14	10.7143	19.1	7.2	3.4	A4	0.0324324	41.616	41.616
6							2021-04-19	14
7	B	1	399603	2021-02-03	FIH	18.7	2021-04-19	14	10.7143	19.2	3.7	3.2	B1	0.026738	18.944	18.944
6							2021-04-19	14
9	B	3	399605	2021-02-03	FG	21.2	2021-04-19	14	10.7143	21.8	5.2	3	B3	0.0283019	23.4	23.4
10	B	4	399606	2021-02-03	FIH	21.2	2021-04-19	14	10.7143	20.1	2.7	2.7	B4	-0.0518868	9.8415	9.8415
11	C	0	399607	2021-02-03	DF	19.4	2021-04-19	14	10.7143	19.1	3.2	2.1	C0	-0.0154639	7.056	14.8685	7.8125	2.5	2.5
12	C	1	399608	2021-02-03	DF	19.8	2021-04-19	14	10.7143	19.9	3.8	2.7	C1	0.00505051	13.851	31.401	17.55	3.9	3
13	C	2	399609	2021-02-03	FG	19.8	2021-04-19	14	10.7143	19.2	7.9	3.7	C2	-0.030303	54.0755	f
14	C	3	399610	2021-02-03	DF	19.5	2021-04-19	14	10.7143	19.2	6.5	3.7	C3	-0.0153846	44.4925	66.115	21.6225	4.5	3.1
15	C	4	399611	2021-02-03	1	20.1	2021-04-19	14	10.7143	20.7	3.8	3.3	C4	0.0298507	20.691	20.691	0
16	D	0	399612	2021-02-03	21	18.6	2021-04-19	14	10.7143	19.5	3.4	2.2	D0	0.0483871	8.228	8.228
17	D	1	399613	2021-02-03	5	20.4	2021-04-19	14	10.7143	20.4	6.4	3.7	D1	0	43.808	43.808
18	D	2	399614	2021-02-03	1	18.8	2021-04-19	14	10.7143	18.5	6.3	2.7	D2	-0.0159574	22.9635	22.9635
19	D	3	399615	2021-02-03	5	21.1	2021-04-19	14	10.7143	20.5	3.3	3.1	D3	-0.028436	15.8565	15.8565
20	D	4	399616	2021-02-03	1	18.8	2021-04-19	14	10.7143	19.1	5.8	2.9	D4	0.0159574	24.389	24.389
21	E	0	399617	2021-02-03	21	19.6	2021-04-19	14	10.7143	20.4	2.7	2.5	E0	0.0408163	8.4375	f	32.4625	5.3	3.5
22	E	1	399618	2021-02-03	21	20.3	2021-04-19	14	10.7143	21.1	6	4.1	E1	0.0394089	50.43	50.43
23	E	2	399619	2021-02-03	21	18.4	2021-04-19	14	10.7143	18.2	5.6	3.9	E2	-0.0108696	42.588	42.588
24	E	3	399620	2021-02-03	5	21.1	2021-04-19	14	10.7143	19.8	2.4	2.2	E3	-0.0616114	5.808	f
25	E	4	399621	2021-02-03	FIH	18	2021-04-19	14	10.7143	18.5	5.3	2.8	E4	0.0277778	20.776	20.776
26	F	0	399622	2021-02-03	NoT	18.7	2021-04-19	14	10.7143	20.1	4	3.8	F0	0.0748663	28.88	77.254	48.374	6.7	3.8
27	F	1	399623	2021-02-03	FG	19.3	2021-04-19	14	10.7143	20.1	11.5	4.9	F1	0.0414508	138.058	138.058
28	F	2	399624	2021-02-03	1	19.4	2021-04-19	14	10.7143	20	5.9	2.4	F2	0.0309278	16.992	f					IP?
29	F	3	399625	2021-02-03	1	20.5	2021-04-19	14	10.7143	20.5	4.8	3.7	F3	0	32.856	57.156	24.3	5.4	3
30	F	4	399626	2021-02-03	NoT	21.4	2021-04-19	14	10.7143	22.3	6.6	4.4	F4	0.0420561	63.888	63.888
31							2021-04-19	14
32	G	1	399628	2021-02-03	5	21.2	2021-04-19	14	10.7143	21.1	3.9	2.8	G1	-0.00471698	15.288	15.288
33	G	2	399629	2021-02-03	5	18.5	2021-04-19	14	10.7143	18.5	6	5.6	G2	0	94.08	94.08
34	G	3	399630	2021-02-03	VHL	21	2021-04-19	14	10.7143	21.5	3.7	3.4	G3	0.0238095	21.386	21.386
35	G	4	399631	2021-02-03	FG	19.1	2021-04-19	14	10.7143	19.3	5.8	2.6	G4	0.0104712	19.604	19.604
36	H	0	399632	2021-02-03	1	19.7	2021-04-19	14	10.7143	19.1	7.7	3.4	H0	-0.0304569	44.506	44.506
37	H	1	399633	2021-02-03	NoT	20.8	2021-04-19	14	10.7143	21	5.1	3.4	H1	0.00961538	29.478	29.478	0
38	H	2	399634	2021-02-03	FG	19	2021-04-19	14	10.7143	19.1	4.1	3.2	H2	0.00526316	20.992	20.992
39	H	3	399635	2021-02-03	VHL	20.4	2021-04-19	14	10.7143	20.4	8.5	5.8	H3	0	142.97	142.97
40	H	4	399636	2021-02-03	FG	19	2021-04-19	14	10.7143	18.9	8.9	3.8	H4	-0.00526316	64.258	64.258
41	I	0	399637	2021-02-03	NoT	20.4	2021-04-19	14	10.7143	19.9	4	2.6	I0	-0.0245098	13.52	13.52
42	I	1	399638	2021-02-03	DIH	19.8	2021-04-19	14	10.7143	20	7.1	2.6	I1	0.010101	23.998	23.998
43	I	2	399639	2021-02-03	DIH	19.6	2021-04-19	14	10.7143	20.6	4.4	3.5	I2	0.0510204	26.95	26.95
44	I	3	399640	2021-02-03	11	19.4	2021-04-19	14	10.7143	20.4	3	2.9	I3	0.0515464	12.615	12.615
45	I	4	399641	2021-02-03	21	18.7	2021-04-19	14	10.7143	18.7	5.2	4.5	I4	0	52.65	52.65
46	J	0	399642	2021-02-03	VHL	19.1	2021-04-19	14	10.7143	20	4.1	3.3	J0	0.0471204	22.3245	22.3245
47	J	1	399643	2021-02-03	1	20.5	2021-04-19	14	10.7143	20.6	4.1	3.1	J1	0.00487805	19.7005	19.7005	0
48	J	2	399644	2021-02-03	VHL	20.9	2021-04-19	14	10.7143	21.2	5.2	3.8	J2	0.0143541	37.544	37.544
49	J	3	399645	2021-02-03	FG	21.1	2021-04-19	14	10.7143	21.3	3.7	1.7	J3	0.00947867	5.3465	5.3465	0
50	J	4	399646	2021-02-03	5	20.9	2021-04-19	14	10.7143	21.5	8.2	4.1	J4	0.0287081	68.921	68.921
51	K	0	399647	2021-02-03	DF	19.2	2021-04-19	14	10.7143	19.5	3.8	3.2	K0	0.015625	19.456	19.456
52	K	1	399648	2021-02-03	DF	20.9	2021-04-19	14	10.7143	20.1	5.9	3	K1	-0.0382775	26.55	26.55
53	K	2	399649	2021-02-03	21	19.9	2021-04-19	14	10.7143	19.8	3.7	2.1	K2	-0.00502513	8.1585	f
54	K	3	399650	2021-02-03	FIH?	20.7	2021-04-19	14	10.7143	21.9	2.1	2.1	K3	0.057971	4.6305	4.6305
55	K	4	399651	2021-02-03	VHL?	17.3	2021-04-19	14	10.7143	17.1	4.3	2.8	K4	-0.0115607	16.856	16.856
56	L	0	399652	2021-02-03	DF	19.9	2021-04-19	14	10.7143	19.8	7.5	6.3	L0	-0.00502513	148.838	148.838
57	L	1	399653	2021-02-03	FG	21.4	2021-04-19	14	10.7143	20.9	4.6	4.2	L1	-0.0233645	40.572	40.572
58	L	2	399654	2021-02-03	DF	20.1	2021-04-19	14	10.7143	19.6	8.4	5.1	L2	-0.0248756	109.242	109.242
59	L	3	399655	2021-02-03	DF	19.1	2021-04-19	14	10.7143	19.8	2.4	2.4	L3	0.0366492	6.912	6.912
60	L	4	399656	2021-02-03	FG	19.8	2021-04-19	14	10.7143	20.7	6.8	4.1	L4	0.0454545	57.154	57.154
61	M	0	399657	2021-02-03	VHL	18.6	2021-04-19	14	10.7143	19.5	4.4	3	M0	0.0483871	19.8	19.8	0
62	M	1	399658	2021-02-03	21	16.8	2021-04-19	14	10.7143	18.1	7.1	6.9	M1	0.077381	169.016	169.016
63	M	2	399659	2021-02-03	21	19.8	2021-04-19	14	10.7143	19.3	2.6	2.4	M2	-0.0252525	7.488	7.488
64	M	3	399660	2021-02-03	VHL	21.5	2021-04-19	14	10.7143	20.5	7.7	5.6	M3	-0.0465116	120.736	143.32	22.5835	4.7	3.1
65	M	4	399661	2021-02-03	VHL	18.3	2021-04-19	14	10.7143	19.5	5.5	5.4	M4	0.0655738	80.19	80.19
66	N	0	399662	2021-02-03	NOT	19.5	2021-04-19	14	10.7143	20.1	6.4	5.6	N0	0.0307692	100.352	100.352
67	N	1	399663	2021-02-03	FIH	20.9	2021-04-19	14	10.7143	20.1	3.7	2.7	N1	-0.0382775	13.4865	13.4865	0
68	N	2	399664	2021-02-03	VHL	19.6	2021-04-19	14	10.7143	19.4	6.6	5.4	N2	-0.0102041	96.228	96.228
69	N	3	399665	2021-02-03	5	18.7	2021-04-19	14	10.7143	19	4.8	4.6	N3	0.0160428	50.784	70.436	19.652	3.4	3.4
70	N	4	399666	2021-02-03	VHL	19.1	2021-04-19	14	10.7143	19.4	7.5	5.9	N4	0.0157068	130.537	130.537
71	O	0	399667	2021-02-03	FG	17.5	2021-04-19	14	10.7143	17.7	7.1	3.1	O0	0.0114286	34.1155	34.1155
72	O	1	399668	2021-02-03	NOT	21	2021-04-19	14	10.7143	21	5.1	2.9	O1	0	21.4455	21.4455
73	O	2	399669	2021-02-03	FIH	19	2021-04-19	14	10.7143	19.9	5.3	2	O2	0.0473684	10.6	f
74	O	3	399670	2021-02-03	FIH	17	2021-04-19	14	10.7143	17.9	4	3.5	O3	0.0529412	24.5	24.5
75	O	4	399671	2021-02-03	1	20.3	2021-04-19	14	10.7143	19.5	3.2	2.1	O4	-0.0394089	7.056	16.8975	9.8415	2.7	2.7
76							2021-04-19	14
77	P	2	399673	2021-02-03	5	19.5	2021-04-19	14	10.7143		5.4	2.7	P1		19.683	19.683
78	P	3	399674	2021-02-03	5	18.7	2021-04-19	14	10.7143	19.4	3.4	2.3	P2	0.0374332	8.993	f
79	P	4	399675	2021-02-03	FIH	19.6	2021-04-19	14	10.7143	19.5	5.3	4.1	P3	-0.00510204	44.5465	44.5465
80	P	5	399676	2021-02-03	1	19.8	2021-04-19	14	10.7143	20.4	4.8	2.6	P4	0.030303	16.224	f
								-44291
1	A	0	399597	2021-02-03	NoT	18.5	2021-04-21	16	11	18.9	5.1	4	A0	0.0216216	40.8	40.8
2	A	1	399598	2021-02-03	21	19.9	2021-04-21	16	11	19.5	2.9	2	A1	-0.0201005	5.8	5.8	0
3	A	2	399599	2021-02-03	DF	20.8	2021-04-21	16	11	19.9	6.1	4.2	A2	-0.0432692	53.802	53.802
4	A	3	399600	2021-02-03	FG	19	2021-04-21	16	11	19.1	3.7	2.9	A3	0.00526316	15.5585	15.5585
5	A	4	399601	2021-02-03	21	18.5	2021-04-21	16	11	19	5.6	3.2	A4	0.027027	28.672	f
6							2021-04-21	16
7	B	1	399603	2021-02-03	FIH	18.7	2021-04-21	16	11	19.5	5.6	3.2	B1	0.0427807	28.672	28.672
6							2021-04-21	16
9	B	3	399605	2021-02-03	FG	21.2	2021-04-21	16	11	21.4	4.8	3.8	B3	0.00943396	34.656	f
10	B	4	399606	2021-02-03	FIH	21.2	2021-04-21	16	11	20.6	4.5	2.3	B4	-0.0283019	11.9025	f
11	C	0	399607	2021-02-03	DF	19.4	2021-04-21	16	11	19.2	3.8	2.5	C0	-0.0103093	11.875	11.875	0
12	C	1	399608	2021-02-03	DF	19.8	2021-04-21	16	11	20.2	3.4	3.3	C1	0.020202	18.513	34.897	16.384	3.2	3.2
13	C	2	399609	2021-02-03	FG	19.8	2021-04-21	16	11	19.4	0	0	C2	-0.020202	0	f
14	C	3	399610	2021-02-03	DF	19.5	2021-04-21	16	11	19.9	7.6	4.7	C3	0.0205128	83.942	93.158	9.216	3.2	2.4
15	C	4	399611	2021-02-03	1	20.1	2021-04-21	16	11	21	2.7	2.3	C4	0.0447761	7.1415	7.1415	0
16	D	0	399612	2021-02-03	21	18.6	2021-04-21	16	11	19.4	6.2	3.8	D0	0.0430108	44.764	44.764
17	D	1	399613	2021-02-03	5	20.4	2021-04-21	16	11	20.9	5.2	2.6	D1	0.0245098	17.576	17.576
18	D	2	399614	2021-02-03	1	18.8	2021-04-21	16	11	19.3	6.5	1.8	D2	0.0265957	10.53	10.53
19	D	3	399615	2021-02-03	5	21.1	2021-04-21	16	11	20.9	2.2	2.2	D3	-0.00947867	5.324	5.324
20	D	4	399616	2021-02-03	1	18.8	2021-04-21	16	11	19.7	10.1	2	D4	0.0478723	20.2	f
21	E	0	399617	2021-02-03	21	19.6	2021-04-21	16	11	20.3	4.6	3.2	E0	0.0357143	23.552	f	0
22	E	1	399618	2021-02-03	21	20.3	2021-04-21	16	11	20.9	6.4	3.3	E1	0.0295567	34.848	34.848
23	E	2	399619	2021-02-03	21	18.4	2021-04-21	16	11	18.2	6.1	3.4	E2	-0.0108696	35.258	35.258
24	E	3	399620	2021-02-03	5	21.1	2021-04-21	16	11	20.5	6.4	2.8	E3	-0.028436	25.088	f
25	E	4	399621	2021-02-03	FIH	18	2021-04-21	16	11	18.5	5.8	3	E4	0.0277778	26.1	26.1
26	F	0	399622	2021-02-03	NoT	18.7	2021-04-21	16	11	20.5	4	3.6	F0	0.0962567	25.92	25.92	0
27	F	1	399623	2021-02-03	FG	19.3	2021-04-21	16	11	20	7.9	4.3	F1	0.0362694	73.0355	73.0355
28	F	2	399624	2021-02-03	1	19.4	2021-04-21	16	11	20.4	0	0	F2	0.0515464	0	f					IP?
29	F	3	399625	2021-02-03	1	20.5	2021-04-21	16	11	20.7	3.8	2.6	F3	0.0097561	12.844	12.844	0
30	F	4	399626	2021-02-03	NoT	21.4	2021-04-21	16	11	21.8	7.5	5.4	F4	0.0186916	109.35	109.35
31							2021-04-21	16
32	G	1	399628	2021-02-03	5	21.2	2021-04-21	16	11	21.3	3.4	2.5	G1	0.00471698	10.625	10.625
33	G	2	399629	2021-02-03	5	18.5	2021-04-21	16	11	18.9	5.3	3.5	G2	0.0216216	32.4625	32.4625
34	G	3	399630	2021-02-03	VHL	21	2021-04-21	16	11	21.3	4.2	3	G3	0.0142857	18.9	18.9
35	G	4	399631	2021-02-03	FG	19.1	2021-04-21	16	11	19.2	5	2.8	G4	0.0052356	19.6	19.6
36	H	0	399632	2021-02-03	1	19.7	2021-04-21	16	11	19.5	3.8	2.4	H0	-0.0101523	10.944	27.328	16.384	3.2	3.2
37	H	1	399633	2021-02-03	NoT	20.8	2021-04-21	16	11	21.7	4.8	3.6	H1	0.0432692	31.104	31.104	0
38	H	2	399634	2021-02-03	FG	19	2021-04-21	16	11	19.2	3.7	2.8	H2	0.0105263	14.504	14.504
39	H	3	399635	2021-02-03	VHL	20.4	2021-04-21	16	11	20.5	7.8	5.3	H3	0.00490196	109.551	109.551
40	H	4	399636	2021-02-03	FG	19	2021-04-21	16	11	19.4	3.8	2.2	H4	0.0210526	9.196	9.196
41	I	0	399637	2021-02-03	NoT	20.4	2021-04-21	16	11	20	4.3	3	I0	-0.0196078	19.35	29.43	10.08	3.5	2.4
42	I	1	399638	2021-02-03	DIH	19.8	2021-04-21	16	11	20.1	6	2.9	I1	0.0151515	25.23	25.23
43	I	2	399639	2021-02-03	DIH	19.6	2021-04-21	16	11	20.7	4.7	3.7	I2	0.0561224	32.1715	f
44	I	3	399640	2021-02-03	11	19.4	2021-04-21	16	11	20.8	4.4	3	I3	0.0721649	19.8	19.8
45	I	4	399641	2021-02-03	21	18.7	2021-04-21	16	11	18.8	4.8	3.8	I4	0.00534759	34.656	34.656
46	J	0	399642	2021-02-03	VHL	19.1	2021-04-21	16	11	19.6	4.6	3.4	J0	0.026178	26.588	26.588
47	J	1	399643	2021-02-03	1	20.5	2021-04-21	16	11	20.4	4.2	2.6	J1	-0.00487805	14.196	f	0
48	J	2	399644	2021-02-03	VHL	20.9	2021-04-21	16	11	21.9	4.6	3.2	J2	0.0478469	23.552	23.552
49	J	3	399645	2021-02-03	FG	21.1	2021-04-21	16	11	21.9	0	0	J3	0.0379147	0	0	0
50	J	4	399646	2021-02-03	5	20.9	2021-04-21	16	11	21.6	2.8	2.4	J4	0.0334928	8.064	8.064
51	K	0	399647	2021-02-03	DF	19.2	2021-04-21	16	11	19.4	4.3	2.7	K0	0.0104167	15.6735	15.6735
52	K	1	399648	2021-02-03	DF	20.9	2021-04-21	16	11	20	5.5	3.5	K1	-0.0430622	33.6875	33.6875
53	K	2	399649	2021-02-03	21	19.9	2021-04-21	16	11	20.1	0	0	K2	0.0100503	0	f
54	K	3	399650	2021-02-03	FIH?	20.7	2021-04-21	16	11	20.9	1.9	1.9	K3	0.00966184	3.4295	3.4295
55	K	4	399651	2021-02-03	VHL?	17.3	2021-04-21	16	11	17.5	2.6	2.4	K4	0.0115607	7.488	7.488
56	L	0	399652	2021-02-03	DF	19.9	2021-04-21	16	11	20.1	7	6.5	L0	0.0100503	147.875	147.875
57	L	1	399653	2021-02-03	FG	21.4	2021-04-21	16	11	21.3	4.8	4.5	L1	-0.0046729	48.6	48.6
58	L	2	399654	2021-02-03	DF	20.1	2021-04-21	16	11	19.7	8.4	5.4	L2	-0.0199005	122.472	122.472
59	L	3	399655	2021-02-03	DF	19.1	2021-04-21	16	11	19.5	2.8	2	L3	0.0209424	5.6	5.6
60	L	4	399656	2021-02-03	FG	19.8	2021-04-21	16	11	20.6	6.5	3.1	L4	0.040404	31.2325	31.2325
61	M	0	399657	2021-02-03	VHL	18.6	2021-04-21	16	11	19.6	3.2	3.1	M0	0.0537634	15.376	15.376	0
62	M	1	399658	2021-02-03	21	16.8	2021-04-21	16	11	18	5.8	5.2	M1	0.0714286	78.416	78.416
63	M	2	399659	2021-02-03	21	19.8	2021-04-21	16	11	20.2	3.1	2.3	M2	0.020202	8.1995	8.1995
64	M	3	399660	2021-02-03	VHL	21.5	2021-04-21	16	11	21.3	7.1	5.2	M3	-0.00930233	95.992	109.843	13.851	3.8	2.7
65	M	4	399661	2021-02-03	VHL	18.3	2021-04-21	16	11	18.8	6.4	5.3	M4	0.0273224	89.888	89.888
66	N	0	399662	2021-02-03	NOT	19.5	2021-04-21	16	11	19.8	7.5	6.3	N0	0.0153846	148.838	148.838
67	N	1	399663	2021-02-03	FIH	20.9	2021-04-21	16	11	20.7	3	2.3	N1	-0.00956938	7.935	7.935	0
68	N	2	399664	2021-02-03	VHL	19.6	2021-04-21	16	11	19.9	5.3	4.6	N2	0.0153061	56.074	56.074
69	N	3	399665	2021-02-03	5	18.7	2021-04-21	16	11	19	4.5	3.6	N3	0.0160428	29.16	51.7435	22.5835	4.7	3.1
70	N	4	399666	2021-02-03	VHL	19.1	2021-04-21	16	11	19.9	8.3	5.7	N4	0.0418848	134.834	134.834
71	O	0	399667	2021-02-03	FG	17.5	2021-04-21	16	11	18	6.5	3.2	O0	0.0285714	33.28	33.28
72	O	1	399668	2021-02-03	NOT	21	2021-04-21	16	11	21	6.7	4.9	O1	0	80.4335	80.4335
73	O	2	399669	2021-02-03	FIH	19	2021-04-21	16	11	20.3	4.6	2.8	O2	0.0684211	18.032	18.032
74	O	3	399670	2021-02-03	FIH	17	2021-04-21	16	11	18	4	3.1	O3	0.0588235	19.22	19.22
75	O	4	399671	2021-02-03	1	20.3	2021-04-21	16	11	19.5	3	2.1	O4	-0.0394089	6.615	11.2455	4.6305	2.1	2.1
76							2021-04-21	16
77	P	2	399673	2021-02-03	5	19.5	2021-04-21	16	11	19.3	4.8	3	P1	-0.0102564	21.6	21.6
78	P	3	399674	2021-02-03	5	18.7	2021-04-21	16	11	20.1	2.8	2.2	P2	0.0748663	6.776	f
79	P	4	399675	2021-02-03	FIH	19.6	2021-04-21	16	11	19.8	4.6	4	P3	0.0102041	36.8	36.8
80	P	5	399676	2021-02-03	1	19.8	2021-04-21	16	11	20.4	4.3	2.5	P4	0.030303	13.4375	f
								-44291
1	A	0	399597	2021-02-03	NoT	18.5	2021-04-23	18	11.2857	18.7	8	5.7	A0	0.0108108	129.96	129.96
2	A	1	399598	2021-02-03	21	19.9	2021-04-23	18	11.2857	19.4	0	0	A1	-0.0251256	0	0	0
3	A	2	399599	2021-02-03	DF	20.8	2021-04-23	18	11.2857	20.3	8.3	5	A2	-0.0240385	103.75	103.75
4	A	3	399600	2021-02-03	FG	19	2021-04-23	18	11.2857	19.2	0	0	A3	0.0105263	0	0
5	A	4	399601	2021-02-03	21	18.5	2021-04-23	18	11.2857	18.7	0	0	A4	0.0108108	0	0
6							2021-04-23	18
7	B	1	399603	2021-02-03	FIH	18.7	2021-04-23	18	11.2857	19.3	0	0	B1	0.0320856	0	0
6							2021-04-23	18
9	B	3	399605	2021-02-03	FG	21.2	2021-04-23	18	11.2857	22.2	5.2	3	B3	0.0471698	23.4	23.4
10	B	4	399606	2021-02-03	FIH	21.2	2021-04-23	18	11.2857	20.7	2.7	2.1	B4	-0.0235849	5.9535	5.9535
11	C	0	399607	2021-02-03	DF	19.4	2021-04-23	18	11.2857	18.8	2.7	2.1	C0	-0.0309278	5.9535	5.9535	0
12	C	1	399608	2021-02-03	DF	19.8	2021-04-23	18	11.2857	19.6	4.3	3.3	C1	-0.010101	23.4135	36.9135	13.5	3	3
13	C	2	399609	2021-02-03	FG	19.8	2021-04-23	18	11.2857	19.3	0	0	C2	-0.0252525	0	0
14	C	3	399610	2021-02-03	DF	19.5	2021-04-23	18	11.2857	19.1	13.5	5.4	C3	-0.0205128	196.83	196.83	0
15	C	4	399611	2021-02-03	1	20.1	2021-04-23	18	11.2857	20.3	2.1	2.1	C4	0.00995025	4.6305	4.6305	0
16	D	0	399612	2021-02-03	21	18.6	2021-04-23	18	11.2857	20.9	0	0	D0	0.123656	0	0
17	D	1	399613	2021-02-03	5	20.4	2021-04-23	18	11.2857	21.8	3.3	1.9	D1	0.0686275	5.9565	5.9565
18	D	2	399614	2021-02-03	1	18.8	2021-04-23	18	11.2857	18.7	7.4	2	D2	-0.00531915	14.8	14.8
19	D	3	399615	2021-02-03	5	21.1	2021-04-23	18	11.2857	21	2.9	2.3	D3	-0.00473934	7.6705	7.6705
20	D	4	399616	2021-02-03	1	18.8	2021-04-23	18	11.2857	18.8	0	0	D4	0	0	0
21	E	0	399617	2021-02-03	21	19.6	2021-04-23	18	11.2857	20.7	5.7	3.5	E0	0.0561224	34.9125	f	0
22	E	1	399618	2021-02-03	21	20.3	2021-04-23	18	11.2857	20.3	5	2.6	E1	0	16.9	16.9
23	E	2	399619	2021-02-03	21	18.4	2021-04-23	18	11.2857	20.1	6.8	3.1	E2	0.0923913	32.674	32.674
24	E	3	399620	2021-02-03	5	21.1	2021-04-23	18	11.2857	20.3	0	0	E3	-0.0379147	0	0
25	E	4	399621	2021-02-03	FIH	18	2021-04-23	18	11.2857	22.4	6	2.5	E4	0.244444	18.75	18.75
26	F	0	399622	2021-02-03	NoT	18.7	2021-04-23	18	11.2857	20.7	9.6	5.5	F0	0.106952	145.2	228.306	83.106	5.7	5.4
27	F	1	399623	2021-02-03	FG	19.3	2021-04-23	18	11.2857	20.3	7	3.7	F1	0.0518135	47.915	47.915
28	F	2	399624	2021-02-03	1	19.4	2021-04-23	18	11.2857	20.1	0	0	F2	0.0360825	0	0					IP?
29	F	3	399625	2021-02-03	1	20.5	2021-04-23	18	11.2857	20.3	5.3	2.1	F3	-0.0097561	11.6865	21.999	10.3125	3.3	2.5
30	F	4	399626	2021-02-03	NoT	21.4	2021-04-23	18	11.2857	22.4	9	7.1	F4	0.046729	226.845	226.845
31							2021-04-23	18
32	G	1	399628	2021-02-03	5	21.2	2021-04-23	18	11.2857	21.4	3.9	2.5	G1	0.00943396	12.1875	12.1875
33	G	2	399629	2021-02-03	5	18.5	2021-04-23	18	11.2857	19.4	5.3	2.8	G2	0.0486486	20.776	20.776
34	G	3	399630	2021-02-03	VHL	21	2021-04-23	18	11.2857	21.8	0	0	G3	0.0380952	0	0
35	G	4	399631	2021-02-03	FG	19.1	2021-04-23	18	11.2857	18.7	3.9	1.9	G4	-0.0209424	7.0395	7.0395
36	H	0	399632	2021-02-03	1	19.7	2021-04-23	18	11.2857	20	8	3.2	H0	0.0152284	40.96	40.96	0
37	H	1	399633	2021-02-03	NoT	20.8	2021-04-23	18	11.2857	22.1	4.9	4.3	H1	0.0625	45.3005	45.3005	0
38	H	2	399634	2021-02-03	FG	19	2021-04-23	18	11.2857	19.4	2.9	2.3	H2	0.0210526	7.6705	7.6705
39	H	3	399635	2021-02-03	VHL	20.4	2021-04-23	18	11.2857	20.4	9.2	2.7	H3	0	33.534	33.534
40	H	4	399636	2021-02-03	FG	19	2021-04-23	18	11.2857	19.4	3.5	2.4	H4	0.0210526	10.08	10.08
41	I	0	399637	2021-02-03	NoT	20.4	2021-04-23	18	11.2857	20.5	5	3.9	I0	0.00490196	38.025	59.6475	21.6225	4.5	3.1
42	I	1	399638	2021-02-03	DIH	19.8	2021-04-23	18	11.2857	20.7	6.2	2.6	I1	0.0454545	20.956	20.956
43	I	2	399639	2021-02-03	DIH	19.6	2021-04-23	18	11.2857	20.3	0	0	I2	0.0357143	0	0
44	I	3	399640	2021-02-03	11	19.4	2021-04-23	18	11.2857	20.4	4.2	2.7	I3	0.0515464	15.309	15.309
45	I	4	399641	2021-02-03	21	18.7	2021-04-23	18	11.2857	19	4.3	4	I4	0.0160428	34.4	34.4
46	J	0	399642	2021-02-03	VHL	19.1	2021-04-23	18	11.2857	19.7	7.6	4.3	J0	0.0314136	70.262	70.262
47	J	1	399643	2021-02-03	1	20.5	2021-04-23	18	11.2857	20.9	4.2	3.2	J1	0.0195122	21.504	21.504	0
48	J	2	399644	2021-02-03	VHL	20.9	2021-04-23	18	11.2857	21.8	2.9	2.9	J2	0.0430622	12.1945	12.1945
49	J	3	399645	2021-02-03	FG	21.1	2021-04-23	18	11.2857	21.7	0	0	J3	0.028436	0	0	0
50	J	4	399646	2021-02-03	5	20.9	2021-04-23	18	11.2857	21.7	2.6	2.5	J4	0.0382775	8.125	8.125
51	K	0	399647	2021-02-03	DF	19.2	2021-04-23	18	11.2857	19.6	3.2	3.2	K0	0.0208333	16.384	16.384
52	K	1	399648	2021-02-03	DF	20.9	2021-04-23	18	11.2857	20.4	6.1	3.3	K1	-0.0239234	33.2145	33.2145
53	K	2	399649	2021-02-03	21	19.9	2021-04-23	18	11.2857	20.6	4.9	3.1	K2	0.0351759	23.5445	23.5445
54	K	3	399650	2021-02-03	FIH?	20.7	2021-04-23	18	11.2857	21.7	0	0	K3	0.0483092	0	0
55	K	4	399651	2021-02-03	VHL?	17.3	2021-04-23	18	11.2857	17.8	2.7	2.2	K4	0.0289017	6.534	6.534
56	L	0	399652	2021-02-03	DF	19.9	2021-04-23	18	11.2857	20	8.1	6.9	L0	0.00502513	192.821	192.821
57	L	1	399653	2021-02-03	FG	21.4	2021-04-23	18	11.2857	21.7	4.4	4	L1	0.0140187	35.2	35.2
58	L	2	399654	2021-02-03	DF	20.1	2021-04-23	18	11.2857	20.1	9.5	5.1	L2	0	123.547	123.547
59	L	3	399655	2021-02-03	DF	19.1	2021-04-23	18	11.2857	20.2	2.6	2.6	L3	0.0575916	8.788	8.788
60	L	4	399656	2021-02-03	FG	19.8	2021-04-23	18	11.2857	21	4.9	2	L4	0.0606061	9.8	9.8
61	M	0	399657	2021-02-03	VHL	18.6	2021-04-23	18	11.2857	19.8	4.7	3.8	M0	0.0645161	33.934	33.934	0
62	M	1	399658	2021-02-03	21	16.8	2021-04-23	18	11.2857	17.9	4.2	4.2	M1	0.0654762	37.044	37.044
63	M	2	399659	2021-02-03	21	19.8	2021-04-23	18	11.2857	20	2.6	2.6	M2	0.010101	8.788	8.788
64	M	3	399660	2021-02-03	VHL	21.5	2021-04-23	18	11.2857	20.8	7.3	6.2	M3	-0.0325581	140.306	140.306	0
65	M	4	399661	2021-02-03	VHL	18.3	2021-04-23	18	11.2857	19.2	7.2	6.4	M4	0.0491803	147.456	147.456
66	N	0	399662	2021-02-03	NOT	19.5	2021-04-23	18	11.2857	20.1	9	6.6	N0	0.0307692	196.02	196.02
67	N	1	399663	2021-02-03	FIH	20.9	2021-04-23	18	11.2857	20.7	4.3	2.4	N1	-0.00956938	12.384	12.384	0
68	N	2	399664	2021-02-03	VHL	19.6	2021-04-23	18	11.2857	19.2	4.4	3.7	N2	-0.0204082	30.118	30.118
69	N	3	399665	2021-02-03	5	18.7	2021-04-23	18	11.2857	19.4	11.2	4.6	N3	0.0374332	118.496	118.496	0
70	N	4	399666	2021-02-03	VHL	19.1	2021-04-23	18	11.2857	19.6	8.5	6.2	N4	0.026178	163.37	163.37
71	O	0	399667	2021-02-03	FG	17.5	2021-04-23	18	11.2857	18.1	6.2	2.8	O0	0.0342857	24.304	24.304
72	O	1	399668	2021-02-03	NOT	21	2021-04-23	18	11.2857	21	11.3	5.6	O1	0	177.184	177.184
73	O	2	399669	2021-02-03	FIH	19	2021-04-23	18	11.2857	20	0	0	O2	0.0526316	0	0
74	O	3	399670	2021-02-03	FIH	17	2021-04-23	18	11.2857	17.7	7.5	3	O3	0.0411765	33.75	33.75
75	O	4	399671	2021-02-03	1	20.3	2021-04-23	18	11.2857	20.3	0	0	O4	0	0	0	0
76							2021-04-23	18
77	P	2	399673	2021-02-03	5	19.5	2021-04-23	18	11.2857	19.7	5.4	2.6	P1	0.0102564	18.252	18.252
78	P	3	399674	2021-02-03	5	18.7	2021-04-23	18	11.2857	19.7	0	0	P2	0.0534759	0	0
79	P	4	399675	2021-02-03	FIH	19.6	2021-04-23	18	11.2857	20.1	3.9	3.2	P3	0.0255102	19.968	19.968
80	P	5	399676	2021-02-03	1	19.8	2021-04-23	18	11.2857	21.2	0	0	P4	0.0707071	0	0
								-44291
1	A	0	399597	2021-02-03	NoT	18.5	2021-04-25	20	11.5714	18.9	7.8	6.1	A0	0.0216216	145.119	145.119
2	A	1	399598	2021-02-03	21	19.9	2021-04-25	20	11.5714	20.2	0	0	A1	0.0150754	0	0	0
3	A	2	399599	2021-02-03	DF	20.8	2021-04-25	20	11.5714	20.3	8.5	6.7	A2	-0.0240385	190.783	190.783
4	A	3	399600	2021-02-03	FG	19	2021-04-25	20	11.5714	19.5	0	0	A3	0.0263158	0	0
5	A	4	399601	2021-02-03	21	18.5	2021-04-25	20	11.5714	19	0	0	A4	0.027027	0	0
6							2021-04-25	20
7	B	1	399603	2021-02-03	FIH	18.7	2021-04-25	20	11.5714	19.8	0	0	B1	0.0588235	0	0
6							2021-04-25	20
9	B	3	399605	2021-02-03	FG	21.2	2021-04-25	20	11.5714	21.6	0	0	B3	0.0188679	0	0
10	B	4	399606	2021-02-03	FIH	21.2	2021-04-25	20	11.5714	21.2	0	0	B4	0	0	0
11	C	0	399607	2021-02-03	DF	19.4	2021-04-25	20	11.5714	19.3	2.4	2.4	C0	-0.00515464	6.912	6.912	0
12	C	1	399608	2021-02-03	DF	19.8	2021-04-25	20	11.5714	20.1	5	3.8	C1	0.0151515	36.1	68.1	32	4	4
13	C	2	399609	2021-02-03	FG	19.8	2021-04-25	20	11.5714	19.5	0	0	C2	-0.0151515	0	0
14	C	3	399610	2021-02-03	DF	19.5	2021-04-25	20	11.5714	20.1	13.2	8.5	C3	0.0307692	476.85	476.85	0
15	C	4	399611	2021-02-03	1	20.1	2021-04-25	20	11.5714	20.4	1.9	1.7	C4	0.0149254	2.7455	2.7455	0
16	D	0	399612	2021-02-03	21	18.6	2021-04-25	20	11.5714	20.2	0	0	D0	0.0860215	0	0
17	D	1	399613	2021-02-03	5	20.4	2021-04-25	20	11.5714	20.8	2.6	2.6	D1	0.0196078	8.788	8.788
18	D	2	399614	2021-02-03	1	18.8	2021-04-25	20	11.5714	19.5	4.2	2	D2	0.037234	8.4	8.4
19	D	3	399615	2021-02-03	5	21.1	2021-04-25	20	11.5714	21.6	2.7	2.5	D3	0.0236967	8.4375	8.4375
20	D	4	399616	2021-02-03	1	18.8	2021-04-25	20	11.5714	20.1	5.1	1.8	D4	0.0691489	8.262	f
21	E	0	399617	2021-02-03	21	19.6	2021-04-25	20	11.5714	21.7	2.2	2.2	E0	0.107143	5.324	5.324	0
22	E	1	399618	2021-02-03	21	20.3	2021-04-25	20	11.5714	23	5.3	4.4	E1	0.133005	51.304	51.304
23	E	2	399619	2021-02-03	21	18.4	2021-04-25	20	11.5714	19	4.7	2.1	E2	0.0326087	10.3635	10.3635
24	E	3	399620	2021-02-03	5	21.1	2021-04-25	20	11.5714	2	0	0	E3	-0.905213	0	0
25	E	4	399621	2021-02-03	FIH	18	2021-04-25	20	11.5714	18.8	0	0	E4	0.0444444	0	0
26	F	0	399622	2021-02-03	NoT	18.7	2021-04-25	20	11.5714	21.4	16.9	8.1	F0	0.144385	554.404	554.404	0
27	F	1	399623	2021-02-03	FG	19.3	2021-04-25	20	11.5714	19.8	3.7	2.6	F1	0.0259067	12.506	12.506
28	F	2	399624	2021-02-03	1	19.4	2021-04-25	20	11.5714	20.2	0	0	F2	0.0412371	0	0					IP?
29	F	3	399625	2021-02-03	1	20.5	2021-04-25	20	11.5714	21	2.4	2.4	F3	0.0243902	6.912	6.912	0
30	F	4	399626	2021-02-03	NoT	21.4	2021-04-25	20	11.5714	22.6	11.4	10.5	F4	0.0560748	628.425	628.425
31							2021-04-25	20
32	G	1	399628	2021-02-03	5	21.2	2021-04-25	20	11.5714	21.7	4	2.6	G1	0.0235849	13.52	13.52
33	G	2	399629	2021-02-03	5	18.5	2021-04-25	20	11.5714	19.8	4.4	2.6	G2	0.0702703	14.872	14.872
34	G	3	399630	2021-02-03	VHL	21	2021-04-25	20	11.5714	21.7	0	0	G3	0.0333333	0	0
35	G	4	399631	2021-02-03	FG	19.1	2021-04-25	20	11.5714	20.1	0	0	G4	0.052356	0	0
36	H	0	399632	2021-02-03	1	19.7	2021-04-25	20	11.5714	20.5	7.1	3.8	H0	0.0406091	51.262	51.262	0
37	H	1	399633	2021-02-03	NoT	20.8	2021-04-25	20	11.5714	23	6.8	5.3	H1	0.105769	95.506	95.506	0
38	H	2	399634	2021-02-03	FG	19	2021-04-25	20	11.5714	19.7	3.3	2.2	H2	0.0368421	7.986	7.986
39	H	3	399635	2021-02-03	VHL	20.4	2021-04-25	20	11.5714	20.1	9.6	7.2	H3	-0.0147059	248.832	248.832
40	H	4	399636	2021-02-03	DF	19	2021-04-25	20	11.5714	20.1	3.6	2.4	H4	0.0578947	10.368	10.368
41	I	0	399637	2021-02-03	NoT	20.4	2021-04-25	20	11.5714	20	11.7	5.1	I0	-0.0196078	152.158	152.158	0
42	I	1	399638	2021-02-03	FIH	19.8	2021-04-25	20	11.5714	20.3	3	2.5	I1	0.0252525	9.375	9.375
43	I	2	399639	2021-02-03	FIH	19.6	2021-04-25	20	11.5714	20.6	0	0	I2	0.0510204	0	0
44	I	3	399640	2021-02-03	1	19.4	2021-04-25	20	11.5714	20.7	2.9	2.2	I3	0.0670103	7.018	7.018
45	I	4	399641	2021-02-03	21	18.7	2021-04-25	20	11.5714	18.5	4	3.5	I4	-0.0106952	24.5	24.5
46	J	0	399642	2021-02-03	VHL	19.1	2021-04-25	20	11.5714	19.6	5.6	4	J0	0.026178	44.8	44.8
47	J	1	399643	2021-02-03	1	20.5	2021-04-25	20	11.5714	20.5	0	0	J1	0	0	0	0
48	J	2	399644	2021-02-03	VHL	20.9	2021-04-25	20	11.5714	21.7	4	3	J2	0.0382775	18	18
49	J	3	399645	2021-02-03	FG	21.1	2021-04-25	20	11.5714	22	0	0	J3	0.042654	0	0	0
50	J	4	399646	2021-02-03	5	20.9	2021-04-25	20	11.5714	21.5	0	0	J4	0.0287081	0	0
51	K	0	399647	2021-02-03	DF	19.2	2021-04-25	20	11.5714	19.6	3.5	3.1	K0	0.0208333	16.8175	16.8175
52	K	1	399648	2021-02-03	DF	20.9	2021-04-25	20	11.5714	20.2	5.7	3.4	K1	-0.0334928	32.946	32.946
53	K	2	399649	2021-02-03	21	19.9	2021-04-25	20	11.5714	20.4	0	0	K2	0.0251256	0	0
54	K	3	399650	2021-02-03	FIH?	20.7	2021-04-25	20	11.5714	21.6	0	0	K3	0.0434783	0	0
55	K	4	399651	2021-02-03	VHL?	17.3	2021-04-25	20	11.5714	18.1	0	0	K4	0.0462428	0	0
56	L	0	399652	2021-02-03	DF	19.9	2021-04-25	20	11.5714	21.1	11.3	8.7	L0	0.0603015	427.648	427.648
57	L	1	399653	2021-02-03	FG	21.4	2021-04-25	20	11.5714	22.1	4.7	4.6	L1	0.0327103	49.726	49.726
58	L	2	399654	2021-02-03	DF	20.1	2021-04-25	20	11.5714	19.7	10	6.5	L2	-0.0199005	211.25	211.25
59	L	3	399655	2021-02-03	DF	19.1	2021-04-25	20	11.5714	20	2.3	2.3	L3	0.0471204	6.0835	6.0835
60	L	4	399656	2021-02-03	FG	19.8	2021-04-25	20	11.5714	22.4	2.1	2.1	L4	0.131313	4.6305	4.6305
61	M	0	399657	2021-02-03	VHL	18.6	2021-04-25	20	11.5714	20	4	3.7	M0	0.0752688	27.38	27.38	0
62	M	1	399658	2021-02-03	21	16.8	2021-04-25	20	11.5714	17.7	4.4	3.5	M1	0.0535714	26.95	26.95
63	M	2	399659	2021-02-03	21	19.8	2021-04-25	20	11.5714	20.6	1.9	1.9	M2	0.040404	3.4295	3.4295
64	M	3	399660	2021-02-03	VHL	21.5	2021-04-25	20	11.5714	21	7.7	6.3	M3	-0.0232558	152.806	152.806	0
65	M	4	399661	2021-02-03	VHL	18.3	2021-04-25	20	11.5714	19.2	7.7	6.7	M4	0.0491803	172.827	172.827
66	N	0	399662	2021-02-03	NOT	19.5	2021-04-25	20	11.5714	20.2	10.3	8	N0	0.0358974	329.6	329.6
67	N	1	399663	2021-02-03	FIH	20.9	2021-04-25	20	11.5714	20.5	3.1	2.6	N1	-0.0191388	10.478	10.478	0
68	N	2	399664	2021-02-03	VHL	19.6	2021-04-25	20	11.5714	19.5	3.9	3	N2	-0.00510204	17.55	17.55
69	N	3	399665	2021-02-03	5	18.7	2021-04-25	20	11.5714	19.3	11.2	5.9	N3	0.0320856	194.936	194.936	0
70	N	4	399666	2021-02-03	VHL	19.1	2021-04-25	20	11.5714	20.7	9.9	8.2	N4	0.0837696	332.838	332.838
71	O	0	399667	2021-02-03	FG	17.5	2021-04-25	20	11.5714	18.2	4.8	3.3	O0	0.04	26.136	26.136
72	O	1	399668	2021-02-03	NOT	21	2021-04-25	20	11.5714	21.7	14.3	8.7	O1	0.0333333	541.183	541.183
73	O	2	399669	2021-02-03	FIH	19	2021-04-25	20	11.5714	20.3	0	0	O2	0.0684211	0	0
74	O	3	399670	2021-02-03	FIH	17	2021-04-25	20	11.5714	18.1	3.4	3	O3	0.0647059	15.3	15.3
75	O	4	399671	2021-02-03	1	20.3	2021-04-25	20	11.5714	19.4	0	0	O4	-0.044335	0	0	0
76							2021-04-25	20
77	P	2	399673	2021-02-03	5	19.5	2021-04-25	20	11.5714	20.3	0	0	P1	0.0410256	0	0
78	P	3	399674	2021-02-03	5	18.7	2021-04-25	20	11.5714	20.1	0	0	P2	0.0748663	0	0
79	P	4	399675	2021-02-03	FIH	19.6	2021-04-25	20	11.5714	21	4.5	4.3	P3	0.0714286	41.6025	41.6025
80	P	5	399676	2021-02-03	1	19.8	2021-04-25	20	11.5714	21.1	0	0	P4	0.0656566	0	0
								-44291
1	A	0	399597	2021-02-03	NoT	18.5	2021-04-27	22	11.8571	19.4	10.8	9.4	A0	0.0486486	477.144	477.144
2	A	1	399598	2021-02-03	21	19.9	2021-04-27	22	11.8571	20.3	0	0	A1	0.0201005	0	0	0
3	A	2	399599	2021-02-03	DF	20.8	2021-04-27	22	11.8571	20.7	10.9	7.7	A2	-0.00480769	323.131	323.131
4	A	3	399600	2021-02-03	FG	19	2021-04-27	22	11.8571	19.2	0	0	A3	0.0105263	0	0
5	A	4	399601	2021-02-03	21	18.5	2021-04-27	22	11.8571	19.5	3.4	3.4	A4	0.0540541	19.652	19.652
6							2021-04-27	22
7	B	1	399603	2021-02-03	FIH	18.7	2021-04-27	22	11.8571	19.2	0	0	B1	0.026738	0	0
6							2021-04-27	22
9	B	3	399605	2021-02-03	FG	21.2	2021-04-27	22	11.8571	22.2	0	0	B3	0.0471698	0	0
10	B	4	399606	2021-02-03	FIH	21.2	2021-04-27	22	11.8571	21.3	0	0	B4	0.00471698	0	0
11	C	0	399607	2021-02-03	DF	19.4	2021-04-27	22	11.8571	19.4	2.7	2.7	C0	0	9.8415	9.8415	0
12	C	1	399608	2021-02-03	DF	19.8	2021-04-27	22	11.8571	19.7	5.5	4.9	C1	-0.00505051	66.0275	138.628	72.6	7.5	4.4
13	C	2	399609	2021-02-03	FG	19.8	2021-04-27	22	11.8571	19.3	0	0	C2	-0.0252525	0	0
14	C	3	399610	2021-02-03	DF	19.5	2021-04-27	22	11.8571	19.7	16.3	11.3	C3	0.0102564	1040.67	1040.67	0
15	C	4	399611	2021-02-03	1	20.1	2021-04-27	22	11.8571	20.1	2.7	2.3	C4	0	7.1415	7.1415	0
16	D	0	399612	2021-02-03	21	18.6	2021-04-27	22	11.8571	20.1	0	0	D0	0.0806452	0	0
17	D	1	399613	2021-02-03	5	20.4	2021-04-27	22	11.8571	20.2	0	0	D1	-0.00980392	0	0
18	D	2	399614	2021-02-03	1	18.8	2021-04-27	22	11.8571	19.3	3.6	3.1	D2	0.0265957	17.298	17.298
19	D	3	399615	2021-02-03	5	21.1	2021-04-27	22	11.8571	20.8	0	0	D3	-0.014218	0	0
20	D	4	399616	2021-02-03	1	18.8	2021-04-27	22	11.8571	20.4	0	0	D4	0.0851064	0	0
21	E	0	399617	2021-02-03	21	19.6	2021-04-27	22	11.8571	20.8	3.7	2.7	E0	0.0612245	13.4865	13.4865	0
22	E	1	399618	2021-02-03	21	20.3	2021-04-27	22	11.8571	22.7	0	0	E1	0.118227	0	0
23	E	2	399619	2021-02-03	21	18.4	2021-04-27	22	11.8571	18.9	4.2	3.1	E2	0.0271739	20.181	20.181
24	E	3	399620	2021-02-03	5	21.1	2021-04-27	22	11.8571	21.1	0	0	E3	0	0	0
25	E	4	399621	2021-02-03	FIH	18	2021-04-27	22	11.8571	18.7	0	0	E4	0.0388889	0	0
26	F	0	399622	2021-02-03	NoT	18.7	2021-04-27	22	11.8571	21.6	19.4	10.3	F0	0.15508	1029.07	1029.07	0
27	F	1	399623	2021-02-03	FG	19.3	2021-04-27	22	11.8571	19.6	6.4	3.8	F1	0.015544	46.208	46.208
28	F	2	399624	2021-02-03	1	19.4	2021-04-27	22	11.8571	20.5	0	0	F2	0.056701	0	0					IP?
29	F	3	399625	2021-02-03	1	20.5	2021-04-27	22	11.8571	20.4	2.4	2.4	F3	-0.00487805	6.912	6.912	0
30	F	4	399626	2021-02-03	NoT	21.4	2021-04-27	22	11.8571	22.8	12.2	10.2	F4	0.0654206	634.644	634.644
31							2021-04-27	22
32	G	1	399628	2021-02-03	5	21.2	2021-04-27	22	11.8571	21.1	2.5	3.5	G1	-0.00471698	15.3125	15.3125
33	G	2	399629	2021-02-03	5	18.5	2021-04-27	22	11.8571	19.2	4.1	3.2	G2	0.0378378	20.992	20.992
34	G	3	399630	2021-02-03	VHL	21	2021-04-27	22	11.8571	21.9	0	0	G3	0.0428571	0	0
35	G	4	399631	2021-02-03	FG	19.1	2021-04-27	22	11.8571	20	0	0	G4	0.0471204	0	0
36	H	0	399632	2021-02-03	1	19.7	2021-04-27	22	11.8571	20.4	7.4	4.2	H0	0.035533	65.268	65.268	0
37	H	1	399633	2021-02-03	NoT	20.8	2021-04-27	22	11.8571	23.2	6.6	5.5	H1	0.115385	99.825	99.825	0
38	H	2	399634	2021-02-03	FG	19	2021-04-27	22	11.8571	20	2.9	2.6	H2	0.0526316	9.802	9.802
39	H	3	399635	2021-02-03	VHL	20.4	2021-04-27	22	11.8571	20.4	8.6	8	H3	0	275.2	275.2
40	H	4	399636	2021-02-03	DF	19	2021-04-27	22	11.8571	20.2	3.2	3.2	H4	0.0631579	16.384	16.384
41	I	0	399637	2021-02-03	NoT	20.4	2021-04-27	22	11.8571	20.3	14.2	9.1	I0	-0.00490196	587.951	587.951	0
42	I	1	399638	2021-02-03	FIH	19.8	2021-04-27	22	11.8571	20.4	0	0	I1	0.030303	0	0
43	I	2	399639	2021-02-03	FIH	19.6	2021-04-27	22	11.8571	20.1	0	0	I2	0.0255102	0	0
44	I	3	399640	2021-02-03	1	19.4	2021-04-27	22	11.8571	20.8	3	2.3	I3	0.0721649	7.935	7.935
45	I	4	399641	2021-02-03	21	18.7	2021-04-27	22	11.8571	19.3	5.4	4.6	I4	0.0320856	57.132	57.132
46	J	0	399642	2021-02-03	VHL	19.1	2021-04-27	22	11.8571	19.2	9.5	5	J0	0.0052356	118.75	118.75
47	J	1	399643	2021-02-03	1	20.5	2021-04-27	22	11.8571	20.3	0	0	J1	-0.0097561	0	0	0
48	J	2	399644	2021-02-03	VHL	20.9	2021-04-27	22	11.8571	21.6	2.8	2.5	J2	0.0334928	8.75	8.75
49	J	3	399645	2021-02-03	FG	21.1	2021-04-27	22	11.8571	22.3	0	0	J3	0.056872	0	0	0
50	J	4	399646	2021-02-03	5	20.9	2021-04-27	22	11.8571	21.5	0	0	J4	0.0287081	0	0
51	K	0	399647	2021-02-03	DF	19.2	2021-04-27	22	11.8571	19.2	3.1	2.5	K0	0	9.6875	9.6875
52	K	1	399648	2021-02-03	DF	20.9	2021-04-27	22	11.8571	20.3	5.8	3.5	K1	-0.0287081	35.525	35.525
53	K	2	399649	2021-02-03	21	19.9	2021-04-27	22	11.8571	20.8	0	0	K2	0.0452261	0	0
54	K	3	399650	2021-02-03	FIH?	20.7	2021-04-27	22	11.8571	21.7	0	0	K3	0.0483092	0	0
55	K	4	399651	2021-02-03	VHL?	17.3	2021-04-27	22	11.8571	17.8	0	0	K4	0.0289017	0	0
56	L	0	399652	2021-02-03	DF	19.9	2021-04-27	22	11.8571	21.4	13.9	12.1	L0	0.0753769	1017.55	1017.55
57	L	1	399653	2021-02-03	FG	21.4	2021-04-27	22	11.8571	21.6	5.4	4.2	L1	0.00934579	47.628	47.628
58	L	2	399654	2021-02-03	DF	20.1	2021-04-27	22	11.8571	20.3	10.9	7.4	L2	0.00995025	298.442	298.442
59	L	3	399655	2021-02-03	DF	19.1	2021-04-27	22	11.8571	19.9	2.4	2.4	L3	0.0418848	6.912	6.912
60	L	4	399656	2021-02-03	FG	19.8	2021-04-27	22	11.8571	21.4	0	0	L4	0.0808081	0	0
61	M	0	399657	2021-02-03	VHL	18.6	2021-04-27	22	11.8571	19.7	4.5	3.7	M0	0.0591398	30.8025	30.8025	0
62	M	1	399658	2021-02-03	21	16.8	2021-04-27	22	11.8571	17.2	4.4	3.9	M1	0.0238095	33.462	33.462
63	M	2	399659	2021-02-03	21	19.8	2021-04-27	22	11.8571	19.8	0	0	M2	0	0	0
64	M	3	399660	2021-02-03	VHL	21.5	2021-04-27	22	11.8571	21.7	8.4	7	M3	0.00930233	205.8	205.8	0
65	M	4	399661	2021-02-03	VHL	18.3	2021-04-27	22	11.8571	19.2	8.9	8.7	M4	0.0491803	336.82	336.82
66	N	0	399662	2021-02-03	NOT	19.5	2021-04-27	22	11.8571	20.6	12.8	9.5	N0	0.0564103	577.6	577.6
67	N	1	399663	2021-02-03	FIH	20.9	2021-04-27	22	11.8571	21	0	0	N1	0.00478469	0	0	0
68	N	2	399664	2021-02-03	VHL	19.6	2021-04-27	22	11.8571	19.5	4.3	2.7	N2	-0.00510204	15.6735	15.6735
69	N	3	399665	2021-02-03	5	18.7	2021-04-27	22	11.8571	19	6.2	5.1	N3	0.0160428	80.631	179.869	99.238	5.9	5.8
70	N	4	399666	2021-02-03	VHL	19.1	2021-04-27	22	11.8571	20	12.6	9.8	N4	0.0471204	605.052	605.052
71	O	0	399667	2021-02-03	FG	17.5	2021-04-27	22	11.8571	18.4	5.4	3.8	O0	0.0514286	38.988	38.988
72	O	1	399668	2021-02-03	NOT	21	2021-04-27	22	11.8571	23	15.2	8.7	O1	0.0952381	575.244	575.244
73	O	2	399669	2021-02-03	FIH	19	2021-04-27	22	11.8571	20.4	0	0	O2	0.0736842	0	0
74	O	3	399670	2021-02-03	FIH	17	2021-04-27	22	11.8571	18.2	3.6	3.4	O3	0.0705882	20.808	20.808
75	O	4	399671	2021-02-03	1	20.3	2021-04-27	22	11.8571	19.6	0	0	O4	-0.0344828	0	0	0
76							2021-04-27	22
77	P	2	399673	2021-02-03	5	19.5	2021-04-27	22	11.8571	19.1	2.7	2.7	P1	-0.0205128	9.8415	9.8415
78	P	3	399674	2021-02-03	5	18.7	2021-04-27	22	11.8571	20.2	0	0	P2	0.0802139	0	0
79	P	4	399675	2021-02-03	FIH	19.6	2021-04-27	22	11.8571	20.2	0	0	P3	0.0306122	0	0
80	P	5	399676	2021-02-03	1	19.8	2021-04-27	22	11.8571	21.4	0	0	P4	0.0808081	0	0
								-44291
1	A	0	399597	2021-02-03	NoT	18.5	2021-04-29	24	12.1429	20.6	12.5	10	A0	0.113514	625	625
2	A	1	399598	2021-02-03	21	19.9	2021-04-29	24	12.1429	21.4	0	0	A1	0.0753769	0	0	0
3	A	2	399599	2021-02-03	DF	20.8	2021-04-29	24	12.1429	21.7	12.3	9.3	A2	0.0432692	531.914	531.914
4	A	3	399600	2021-02-03	FG	19	2021-04-29	24	12.1429	20.3	0	0	A3	0.0684211	0	0
5	A	4	399601	2021-02-03	21	18.5	2021-04-29	24	12.1429	20.1	4.5	4.3	A4	0.0864865	41.6025	41.6025
6							2021-04-29	24
7	B	1	399603	2021-02-03	FIH	18.7	2021-04-29	24	12.1429	20.7	0	0	B1	0.106952	0	0
6							2021-04-29	24
9	B	3	399605	2021-02-03	FG	21.2	2021-04-29	24	12.1429	22.8	0	0	B3	0.0754717	0	0
10	B	4	399606	2021-02-03	FIH	21.2	2021-04-29	24	12.1429	22.2	0	0	B4	0.0471698	0	0
11	C	0	399607	2021-02-03	DF	19.4	2021-04-29	24	12.1429	19.5	3	2.4	C0	0.00515464	8.64	8.64	0
12	C	1	399608	2021-02-03	DF	19.8	2021-04-29	24	12.1429	20.1	12.6	5.7	C1	0.0151515	204.687	204.687	0
13	C	2	399609	2021-02-03	FG	19.8	2021-04-29	24	12.1429	20	0	0	C2	0.010101	0	0
14	C	3	399610	2021-02-03	DF	19.5	2021-04-29	24	12.1429				C3		0	0	0
15	C	4	399611	2021-02-03	1	20.1	2021-04-29	24	12.1429	21	3.9	3.2	C4	0.0447761	19.968	36.7855	16.8175	3.5	3.1
16	D	0	399612	2021-02-03	21	18.6	2021-04-29	24	12.1429	21	0	0	D0	0.129032	0	0
17	D	1	399613	2021-02-03	5	20.4	2021-04-29	24	12.1429	21	0	0	D1	0.0294118	0	0
18	D	2	399614	2021-02-03	1	18.8	2021-04-29	24	12.1429	20.2	4.2	3.7	D2	0.0744681	28.749	28.749
19	D	3	399615	2021-02-03	5	21.1	2021-04-29	24	12.1429	21.2	0	0	D3	0.00473934	0	0
20	D	4	399616	2021-02-03	1	18.8	2021-04-29	24	12.1429	20.5	0	0	D4	0.0904255	0	0
21	E	0	399617	2021-02-03	21	19.6	2021-04-29	24	12.1429	20.7	4.1	3.6	E0	0.0561224	26.568	26.568	0
22	E	1	399618	2021-02-03	21	20.3	2021-04-29	24	12.1429	22.7	5.5	4.3	E1	0.118227	50.8475	50.8475
23	E	2	399619	2021-02-03	21	18.4	2021-04-29	24	12.1429	19.8	4.9	2.9	E2	0.076087	20.6045	20.6045
24	E	3	399620	2021-02-03	5	21.1	2021-04-29	24	12.1429	21.1	0	0	E3	0	0	0
25	E	4	399621	2021-02-03	FIH	18	2021-04-29	24	12.1429	19.4	0	0	E4	0.0777778	0	0
26	F	0	399622	2021-02-03	NoT	18.7	2021-04-29	24	12.1429				F0		0	0	0
27	F	1	399623	2021-02-03	FG	19.3	2021-04-29	24	12.1429	20.4	4.8	4	F1	0.0569948	38.4	38.4
28	F	2	399624	2021-02-03	1	19.4	2021-04-29	24	12.1429	21.4	0	0	F2	0.103093	0	0					IP?
29	F	3	399625	2021-02-03	1	20.5	2021-04-29	24	12.1429	21.6	0	0	F3	0.0536585	0	0	0
30	F	4	399626	2021-02-03	NoT	21.4	2021-04-29	24	12.1429				F4		0	0
31							2021-04-29	24
32	G	1	399628	2021-02-03	5	21.2	2021-04-29	24	12.1429	21.4	3.2	3.2	G1	0.00943396	16.384	16.384
33	G	2	399629	2021-02-03	5	18.5	2021-04-29	24	12.1429	19.3	4.6	3.8	G2	0.0432432	33.212	33.212
34	G	3	399630	2021-02-03	VHL	21	2021-04-29	24	12.1429	21.8	0	0	G3	0.0380952	0	0
35	G	4	399631	2021-02-03	FG	19.1	2021-04-29	24	12.1429	19.6	0	0	G4	0.026178	0	0
36	H	0	399632	2021-02-03	1	19.7	2021-04-29	24	12.1429	20.2	8.3	4.9	H0	0.0253807	99.6415	99.6415	0
37	H	1	399633	2021-02-03	NoT	20.8	2021-04-29	24	12.1429	24.7	6.9	5.7	H1	0.1875	112.091	112.091	0
38	H	2	399634	2021-02-03	FG	19	2021-04-29	24	12.1429	20.8	4.2	3	H2	0.0947368	18.9	18.9
39	H	3	399635	2021-02-03	VHL	20.4	2021-04-29	24	12.1429	20.5	9.7	8.7	H3	0.00490196	367.096	367.096
40	H	4	399636	2021-02-03	DF	19	2021-04-29	24	12.1429	21.3	8.1	5.6	H4	0.121053	127.008	127.008
41	I	0	399637	2021-02-03	NoT	20.4	2021-04-29	24	12.1429				I0		0	0	0
42	I	1	399638	2021-02-03	FIH	19.8	2021-04-29	24	12.1429		0	0	I1		0	0
43	I	2	399639	2021-02-03	FIH	19.6	2021-04-29	24	12.1429		0	0	I2		0	0
44	I	3	399640	2021-02-03	1	19.4	2021-04-29	24	12.1429		2.4	2.4	I3		6.912	6.912
45	I	4	399641	2021-02-03	21	18.7	2021-04-29	24	12.1429		9.6	5.1	I4		124.848	124.848
46	J	0	399642	2021-02-03	VHL	19.1	2021-04-29	24	12.1429		6.6	5.2	J0		89.232	89.232
47	J	1	399643	2021-02-03	1	20.5	2021-04-29	24	12.1429		0	0	J1		0	0	0
48	J	2	399644	2021-02-03	VHL	20.9	2021-04-29	24	12.1429		2.4	2.4	J2		6.912	6.912
49	J	3	399645	2021-02-03	FG	21.1	2021-04-29	24	12.1429		0	0	J3		0	0	0
50	J	4	399646	2021-02-03	5	20.9	2021-04-29	24	12.1429		0	0	J4		0	0
51	K	0	399647	2021-02-03	DF	19.2	2021-04-29	24	12.1429		0	0	K0		0	0
52	K	1	399648	2021-02-03	DF	20.9	2021-04-29	24	12.1429		7.2	5.1	K1		93.636	93.636
53	K	2	399649	2021-02-03	21	19.9	2021-04-29	24	12.1429		0	0	K2		0	0
54	K	3	399650	2021-02-03	FIH?	20.7	2021-04-29	24	12.1429		2.4	2.4	K3		6.912	6.912
55	K	4	399651	2021-02-03	VHL?	17.3	2021-04-29	24	12.1429		0	0	K4		0	0
56	L	0	399652	2021-02-03	DF	19.9	2021-04-29	24	12.1429				L0		0	0
57	L	1	399653	2021-02-03	FG	21.4	2021-04-29	24	12.1429		7	5.6	L1		109.76	109.76
58	L	2	399654	2021-02-03	DF	20.1	2021-04-29	24	12.1429		10.9	7.8	L2		331.578	331.578
59	L	3	399655	2021-02-03	DF	19.1	2021-04-29	24	12.1429		2.8	2.4	L3		8.064	8.064
60	L	4	399656	2021-02-03	FG	19.8	2021-04-29	24	12.1429		0	0	L4		0	0
61	M	0	399657	2021-02-03	VHL	18.6	2021-04-29	24	12.1429		5.1	4.6	M0		53.958	53.958	0
62	M	1	399658	2021-02-03	21	16.8	2021-04-29	24	12.1429		6.3	4.9	M1		75.6315	75.6315
63	M	2	399659	2021-02-03	21	19.8	2021-04-29	24	12.1429		1.9	1.9	M2		3.4295	3.4295
64	M	3	399660	2021-02-03	VHL	21.5	2021-04-29	24	12.1429		9.2	8	M3		294.4	294.4	0
65	M	4	399661	2021-02-03	VHL	18.3	2021-04-29	24	12.1429		10	8.8	M4		387.2	387.2
66	N	0	399662	2021-02-03	NOT	19.5	2021-04-29	24	12.1429				N0		0	0
67	N	1	399663	2021-02-03	FIH	20.9	2021-04-29	24	12.1429		0	0	N1		0	0	0
68	N	2	399664	2021-02-03	VHL	19.6	2021-04-29	24	12.1429		3.8	2.6	N2		12.844	12.844
69	N	3	399665	2021-02-03	5	18.7	2021-04-29	24	12.1429		6.7	6.1	N3		124.653	222.339	97.686	6.7	5.4
70	N	4	399666	2021-02-03	VHL	19.1	2021-04-29	24	12.1429				N4		0	0
71	O	0	399667	2021-02-03	FG	17.5	2021-04-29	24	12.1429		5.1	4.3	O0		47.1495	47.1495
72	O	1	399668	2021-02-03	NOT	21	2021-04-29	24	12.1429				O1		0	0
73	O	2	399669	2021-02-03	FIH	19	2021-04-29	24	12.1429		0	0	O2		0	0
74	O	3	399670	2021-02-03	FIH	17	2021-04-29	24	12.1429		3.2	2.7	O3		11.664	11.664
75	O	4	399671	2021-02-03	1	20.3	2021-04-29	24	12.1429		0	0	O4		0	0	0
76							2021-04-29	24
77	P	2	399673	2021-02-03	5	19.5	2021-04-29	24	12.1429		0	0	P1		0	0
78	P	3	399674	2021-02-03	5	18.7	2021-04-29	24	12.1429		4.1	3	P2		18.45	18.45
79	P	4	399675	2021-02-03	FIH	19.6	2021-04-29	24	12.1429		5.5	4.7	P3		60.7475	60.7475
80	P	5	399676	2021-02-03	1	19.8	2021-04-29	24	12.1429		0	0	P4		0	0
								-44291
1	A	0	399597	2021-02-03	NoT	18.5	2021-05-01	26	12.4286				A0		0	0
2	A	1	399598	2021-02-03	21	19.9	2021-05-01	26	12.4286		0	0	A1		0	0	0
3	A	2	399599	2021-02-03	DF	20.8	2021-05-01	26	12.4286				A2		0	0
4	A	3	399600	2021-02-03	FG	19	2021-05-01	26	12.4286		0	0	A3		0	0
5	A	4	399601	2021-02-03	21	18.5	2021-05-01	26	12.4286		7.5	6.8	A4		173.4	173.4
6							2021-05-01	26
7	B	1	399603	2021-02-03	FIH	18.7	2021-05-01	26	12.4286		3.7	3.6	B1		23.976	23.976
6							2021-05-01	26
9	B	3	399605	2021-02-03	FG	21.2	2021-05-01	26	12.4286		0	0	B3		0	0
10	B	4	399606	2021-02-03	FIH	21.2	2021-05-01	26	12.4286		0	0	B4		0	0
11	C	0	399607	2021-02-03	DF	19.4	2021-05-01	26	12.4286		1.8	1.8	C0		2.916	2.916	0
12	C	1	399608	2021-02-03	DF	19.8	2021-05-01	26	12.4286		12.5	8	C1		400	400	0
13	C	2	399609	2021-02-03	FG	19.8	2021-05-01	26	12.4286		6	4.6	C2		63.48	63.48
14	C	3	399610	2021-02-03	DF	19.5	2021-05-01	26	12.4286				C3		0	0	0
15	C	4	399611	2021-02-03	1	20.1	2021-05-01	26	12.4286		7.4	3.9	C4		56.277	56.277	0
16	D	0	399612	2021-02-03	21	18.6	2021-05-01	26	12.4286		7.1	7	D0		173.95	173.95
17	D	1	399613	2021-02-03	5	20.4	2021-05-01	26	12.4286		0	0	D1		0	0
18	D	2	399614	2021-02-03	1	18.8	2021-05-01	26	12.4286		5.5	4.1	D2		46.2275	46.2275
19	D	3	399615	2021-02-03	5	21.1	2021-05-01	26	12.4286		3.4	3.4	D3		19.652	19.652
20	D	4	399616	2021-02-03	1	18.8	2021-05-01	26	12.4286		0	0	D4		0	0
21	E	0	399617	2021-02-03	21	19.6	2021-05-01	26	12.4286		5.5	5	E0		68.75	68.75	0
22	E	1	399618	2021-02-03	21	20.3	2021-05-01	26	12.4286		8.9	6.3	E1		176.62	176.62
23	E	2	399619	2021-02-03	21	18.4	2021-05-01	26	12.4286		7.9	4.8	E2		91.008	91.008
24	E	3	399620	2021-02-03	5	21.1	2021-05-01	26	12.4286		0	0	E3		0	0
25	E	4	399621	2021-02-03	FIH	18	2021-05-01	26	12.4286		2.9	2.9	E4		12.1945	12.1945
26	F	0	399622	2021-02-03	NoT	18.7	2021-05-01	26	12.4286				F0		0	0	0
27	F	1	399623	2021-02-03	FG	19.3	2021-05-01	26	12.4286		7.2	5.5	F1		108.9	108.9
28	F	2	399624	2021-02-03	1	19.4	2021-05-01	26	12.4286		0	0	F2		0	0					IP?
29	F	3	399625	2021-02-03	1	20.5	2021-05-01	26	12.4286		0	0	F3		0	0	0
30	F	4	399626	2021-02-03	NoT	21.4	2021-05-01	26	12.4286				F4		0	0
31							2021-05-01	26
32	G	1	399628	2021-02-03	5	21.2	2021-05-01	26	12.4286		3.6	2.9	G1		15.138	15.138
33	G	2	399629	2021-02-03	5	18.5	2021-05-01	26	12.4286		5.7	4.9	G2		68.4285	68.4285
34	G	3	399630	2021-02-03	VHL	21	2021-05-01	26	12.4286		4.7	3.3	G3		25.5915	25.5915
35	G	4	399631	2021-02-03	FG	19.1	2021-05-01	26	12.4286		0	0	G4		0	0
36	H	0	399632	2021-02-03	1	19.7	2021-05-01	26	12.4286		9.3	5	H0		116.25	116.25	0
37	H	1	399633	2021-02-03	NoT	20.8	2021-05-01	26	12.4286		6.9	6	H1		124.2	124.2	0
38	H	2	399634	2021-02-03	FG	19	2021-05-01	26	12.4286		5.3	3.7	H2		36.2785	36.2785
39	H	3	399635	2021-02-03	VHL	20.4	2021-05-01	26	12.4286		10.3	9.1	H3		426.471	426.471
40	H	4	399636	2021-02-03	DF	19	2021-05-01	26	12.4286		10.9	6.6	H4		237.402	237.402
41	I	0	399637	2021-02-03	NoT	20.4	2021-05-01	26	12.4286				I0		0	0	0
42	I	1	399638	2021-02-03	FIH	19.8	2021-05-01	26	12.4286		0	0	I1		0	0
43	I	2	399639	2021-02-03	FIH	19.6	2021-05-01	26	12.4286		4.7	2.7	I2		17.1315	17.1315
44	I	3	399640	2021-02-03	1	19.4	2021-05-01	26	12.4286		3.3	2.7	I3		12.0285	12.0285
45	I	4	399641	2021-02-03	21	18.7	2021-05-01	26	12.4286		11.2	8	I4		358.4	358.4
46	J	0	399642	2021-02-03	VHL	19.1	2021-05-01	26	12.4286		6.4	5.7	J0		103.968	103.968
47	J	1	399643	2021-02-03	1	20.5	2021-05-01	26	12.4286		4.9	4	J1		39.2	39.2	0
48	J	2	399644	2021-02-03	VHL	20.9	2021-05-01	26	12.4286		2.8	2.7	J2		10.206	10.206
49	J	3	399645	2021-02-03	FG	21.1	2021-05-01	26	12.4286		0	0	J3		0	0	0
50	J	4	399646	2021-02-03	5	20.9	2021-05-01	26	12.4286		5.9	5.7	J4		95.8455	95.8455
51	K	0	399647	2021-02-03	DF	19.2	2021-05-01	26	12.4286		4.4	3.3	K0		23.958	23.958
52	K	1	399648	2021-02-03	DF	20.9	2021-05-01	26	12.4286		7.9	5.2	K1		106.808	106.808
53	K	2	399649	2021-02-03	21	19.9	2021-05-01	26	12.4286		0	0	K2		0	0
54	K	3	399650	2021-02-03	FIH?	20.7	2021-05-01	26	12.4286		4.8	3.5	K3		29.4	34.724	5.324	2.2	2.2
55	K	4	399651	2021-02-03	VHL?	17.3	2021-05-01	26	12.4286		0	0	K4		0	0
56	L	0	399652	2021-02-03	DF	19.9	2021-05-01	26	12.4286				L0		0	0
57	L	1	399653	2021-02-03	FG	21.4	2021-05-01	26	12.4286		9.4	7.7	L1		278.663	278.663
58	L	2	399654	2021-02-03	DF	20.1	2021-05-01	26	12.4286		12.6	9.4	L2		556.668	556.668
59	L	3	399655	2021-02-03	DF	19.1	2021-05-01	26	12.4286		2.5	1.8	L3		4.05	8.1	4.05	2.5	1.8
60	L	4	399656	2021-02-03	FG	19.8	2021-05-01	26	12.4286		5.2	3.3	L4		28.314	28.314
61	M	0	399657	2021-02-03	VHL	18.6	2021-05-01	26	12.4286		4.9	3.7	M0		33.5405	33.5405	0
62	M	1	399658	2021-02-03	21	16.8	2021-05-01	26	12.4286		8.1	7.6	M1		233.928	233.928
63	M	2	399659	2021-02-03	21	19.8	2021-05-01	26	12.4286		1.9	1.9	M2		3.4295	3.4295
64	M	3	399660	2021-02-03	VHL	21.5	2021-05-01	26	12.4286		9.6	9	M3		388.8	388.8	0
65	M	4	399661	2021-02-03	VHL	18.3	2021-05-01	26	12.4286		10.7	8.7	M4		404.941	404.941
66	N	0	399662	2021-02-03	NOT	19.5	2021-05-01	26	12.4286				N0		0	0
67	N	1	399663	2021-02-03	FIH	20.9	2021-05-01	26	12.4286		6.4	5.7	N1		103.968	103.968	0
68	N	2	399664	2021-02-03	VHL	19.6	2021-05-01	26	12.4286		6.8	4	N2		54.4	54.4
69	N	3	399665	2021-02-03	5	18.7	2021-05-01	26	12.4286		14.5	7.7	N3		429.853	429.853	0
70	N	4	399666	2021-02-03	VHL	19.1	2021-05-01	26	12.4286				N4		0	0
71	O	0	399667	2021-02-03	FG	17.5	2021-05-01	26	12.4286		6	5	O0		75	75
72	O	1	399668	2021-02-03	NOT	21	2021-05-01	26	12.4286				O1		0	0
73	O	2	399669	2021-02-03	FIH	19	2021-05-01	26	12.4286		0	0	O2		0	0
74	O	3	399670	2021-02-03	FIH	17	2021-05-01	26	12.4286		3.9	3.8	O3		28.158	28.158
75	O	4	399671	2021-02-03	1	20.3	2021-05-01	26	12.4286		6.4	5.4	O4		93.312	93.312	0
76							2021-05-01	26
77	P	2	399673	2021-02-03	5	19.5	2021-05-01	26	12.4286		4.8	4	P1		38.4	38.4
78	P	3	399674	2021-02-03	5	18.7	2021-05-01	26	12.4286		5.3	5	P2		66.25	66.25
79	P	4	399675	2021-02-03	FIH	19.6	2021-05-01	26	12.4286		7.2	5.4	P3		104.976	104.976
80	P	5	399676	2021-02-03	1	19.8	2021-05-01	26	12.4286		0	0	P4		0	0
								-44291
1	A	0	399597	2021-02-03	NoT	18.5	2021-05-03	28	12.7143				A0		0	0
2	A	1	399598	2021-02-03	21	19.9	2021-05-03	28	12.7143		0	0	A1		0	0	0
3	A	2	399599	2021-02-03	DF	20.8	2021-05-03	28	12.7143				A2		0	0
4	A	3	399600	2021-02-03	FG	19	2021-05-03	28	12.7143		3.4	3.1	A3		16.337	16.337
5	A	4	399601	2021-02-03	21	18.5	2021-05-03	28	12.7143		8.9	7.9	A4		277.725	277.725
6							2021-05-03	28
7	B	1	399603	2021-02-03	FIH	18.7	2021-05-03	28	12.7143		5.3	5	B1		66.25	66.25
6							2021-05-03	28
9	B	3	399605	2021-02-03	FG	21.2	2021-05-03	28	12.7143		0	0	B3		0	0
10	B	4	399606	2021-02-03	FIH	21.2	2021-05-03	28	12.7143		0	0	B4		0	0
11	C	0	399607	2021-02-03	DF	19.4	2021-05-03	28	12.7143		2	2	C0		4	4	0
12	C	1	399608	2021-02-03	DF	19.8	2021-05-03	28	12.7143		15.9	9.2	C1		672.888	672.888	0
13	C	2	399609	2021-02-03	FG	19.8	2021-05-03	28	12.7143		7.4	5.9	C2		128.797	128.797
14	C	3	399610	2021-02-03	DF	19.5	2021-05-03	28	12.7143				C3		0	0	0
15	C	4	399611	2021-02-03	1	20.1	2021-05-03	28	12.7143		9.9	6.7	C4		222.206	293.091	70.886	6.7	4.6
16	D	0	399612	2021-02-03	21	18.6	2021-05-03	28	12.7143		8.5	6.9	D0		202.343	202.343
17	D	1	399613	2021-02-03	5	20.4	2021-05-03	28	12.7143		0	0	D1		0	0
18	D	2	399614	2021-02-03	1	18.8	2021-05-03	28	12.7143		8.6	5.2	D2		116.272	116.272
19	D	3	399615	2021-02-03	5	21.1	2021-05-03	28	12.7143		5.3	4.5	D3		53.6625	53.6625
20	D	4	399616	2021-02-03	1	18.8	2021-05-03	28	12.7143		0	0	D4		0	0
21	E	0	399617	2021-02-03	21	19.6	2021-05-03	28	12.7143		7.9	6.4	E0		161.792	213.704	51.9115	4.7	4.7
22	E	1	399618	2021-02-03	21	20.3	2021-05-03	28	12.7143		10.5	7.8	E1		319.41	319.41
23	E	2	399619	2021-02-03	21	18.4	2021-05-03	28	12.7143		9.8	7.5	E2		275.625	275.625
24	E	3	399620	2021-02-03	5	21.1	2021-05-03	28	12.7143		0	0	E3		0	0
25	E	4	399621	2021-02-03	FIH	18	2021-05-03	28	12.7143		5.9	4.6	E4		62.422	62.422
26	F	0	399622	2021-02-03	NoT	18.7	2021-05-03	28	12.7143				F0		0	0	0
27	F	1	399623	2021-02-03	FG	19.3	2021-05-03	28	12.7143		8.6	7.1	F1		216.763	216.763
28	F	2	399624	2021-02-03	1	19.4	2021-05-03	28	12.7143		0	0	F2		0	0					IP?
29	F	3	399625	2021-02-03	1	20.5	2021-05-03	28	12.7143		4.3	3.6	F3		27.864	58.968	31.104	4.8	3.6
30	F	4	399626	2021-02-03	NoT	21.4	2021-05-03	28	12.7143				F4		0	0
31							2021-05-03	28
32	G	1	399628	2021-02-03	5	21.2	2021-05-03	28	12.7143		4.1	4.1	G1		34.4605	34.4605
33	G	2	399629	2021-02-03	5	18.5	2021-05-03	28	12.7143		7.1	6.2	G2		136.462	136.462
34	G	3	399630	2021-02-03	VHL	21	2021-05-03	28	12.7143		6.6	3.8	G3		47.652	47.652
35	G	4	399631	2021-02-03	FG	19.1	2021-05-03	28	12.7143		0	0	G4		0	0
36	H	0	399632	2021-02-03	1	19.7	2021-05-03	28	12.7143		9.4	7	H0		230.3	ip	0
37	H	1	399633	2021-02-03	NoT	20.8	2021-05-03	28	12.7143		7.7	7.3	H1		205.166	205.166	0
38	H	2	399634	2021-02-03	FG	19	2021-05-03	28	12.7143		6.1	4.2	H2		53.802	53.802
39	H	3	399635	2021-02-03	VHL	20.4	2021-05-03	28	12.7143		11.6	9.5	H3		523.45	523.45
40	H	4	399636	2021-02-03	DF	19	2021-05-03	28	12.7143		15.1	9.4	H4		667.118	667.118
41	I	0	399637	2021-02-03	NoT	20.4	2021-05-03	28	12.7143				I0		0	0	0
42	I	1	399638	2021-02-03	FIH	19.8	2021-05-03	28	12.7143		0	0	I1		0	0
43	I	2	399639	2021-02-03	FIH	19.6	2021-05-03	28	12.7143		6.2	5.1	I2		80.631	80.631
44	I	3	399640	2021-02-03	1	19.4	2021-05-03	28	12.7143		4.1	3.8	I3		29.602	29.602
45	I	4	399641	2021-02-03	21	18.7	2021-05-03	28	12.7143		12.5	7.3	I4		333.062	333.062
46	J	0	399642	2021-02-03	VHL	19.1	2021-05-03	28	12.7143		8.3	7.3	J0		221.154	221.154
47	J	1	399643	2021-02-03	1	20.5	2021-05-03	28	12.7143		4.8	4.1	J1		40.344	40.344	0
48	J	2	399644	2021-02-03	VHL	20.9	2021-05-03	28	12.7143		4.4	3.6	J2		28.512	28.512
49	J	3	399645	2021-02-03	FG	21.1	2021-05-03	28	12.7143		1.8	1.8	J3		2.916	2.916	0
50	J	4	399646	2021-02-03	5	20.9	2021-05-03	28	12.7143		7.1	6.9	J4		169.016	169.016
51	K	0	399647	2021-02-03	DF	19.2	2021-05-03	28	12.7143		3.2	1.9	K0		5.776	5.776
52	K	1	399648	2021-02-03	DF	20.9	2021-05-03	28	12.7143		7.8	6.5	K1		164.775	164.775
53	K	2	399649	2021-02-03	21	19.9	2021-05-03	28	12.7143		0	0	K2		0	0
54	K	3	399650	2021-02-03	FIH?	20.7	2021-05-03	28	12.7143		5.2	3.6	K3		33.696	42.484	8.788	2.6	2.6
55	K	4	399651	2021-02-03	VHL?	17.3	2021-05-03	28	12.7143		0	0	K4		0	0
56	L	0	399652	2021-02-03	DF	19.9	2021-05-03	28	12.7143				L0		0	0
57	L	1	399653	2021-02-03	FG	21.4	2021-05-03	28	12.7143		13.2	9.2	L1		558.624	558.624
58	L	2	399654	2021-02-03	DF	20.1	2021-05-03	28	12.7143				L2		0	0
59	L	3	399655	2021-02-03	DF	19.1	2021-05-03	28	12.7143		5.9	4.9	L3		70.8295	70.8295	0
60	L	4	399656	2021-02-03	FG	19.8	2021-05-03	28	12.7143		8	5.2	L4		108.16	108.16
61	M	0	399657	2021-02-03	VHL	18.6	2021-05-03	28	12.7143		6.3	5.5	M0		95.2875	187.884	92.5965	5.7	5.7
62	M	1	399658	2021-02-03	21	16.8	2021-05-03	28	12.7143		9.7	9.6	M1		446.976	446.976
63	M	2	399659	2021-02-03	21	19.8	2021-05-03	28	12.7143		2.3	1.5	M2		2.5875	2.5875
64	M	3	399660	2021-02-03	VHL	21.5	2021-05-03	28	12.7143		11	9.8	M3		528.22	528.22	0
65	M	4	399661	2021-02-03	VHL	18.3	2021-05-03	28	12.7143		12.6	9.6	M4		580.608	580.608
66	N	0	399662	2021-02-03	NOT	19.5	2021-05-03	28	12.7143				N0		0	0
67	N	1	399663	2021-02-03	FIH	20.9	2021-05-03	28	12.7143		8.3	7.3	N1		221.154	221.154	0
68	N	2	399664	2021-02-03	VHL	19.6	2021-05-03	28	12.7143		8.5	6.2	N2		163.37	163.37
69	N	3	399665	2021-02-03	5	18.7	2021-05-03	28	12.7143				N3		0	dead	0
70	N	4	399666	2021-02-03	VHL	19.1	2021-05-03	28	12.7143				N4		0	0
71	O	0	399667	2021-02-03	FG	17.5	2021-05-03	28	12.7143		6.8	5.5	O0		102.85	102.85
72	O	1	399668	2021-02-03	NOT	21	2021-05-03	28	12.7143				O1		0	0
73	O	2	399669	2021-02-03	FIH	19	2021-05-03	28	12.7143		0	0	O2		0	0
74	O	3	399670	2021-02-03	FIH	17	2021-05-03	28	12.7143		5.2	5.2	O3		70.304	70.304
75	O	4	399671	2021-02-03	1	20.3	2021-05-03	28	12.7143		7.6	7.4	O4		208.088	208.088	0
76							2021-05-03	28
77	P	2	399673	2021-02-03	5	19.5	2021-05-03	28	12.7143		0	0	P1		0	0
78	P	3	399674	2021-02-03	5	18.7	2021-05-03	28	12.7143		6.1	4.9	P2		73.2305	73.2305
79	P	4	399675	2021-02-03	FIH	19.6	2021-05-03	28	12.7143		6.4	5	P3		80	80
80	P	5	399676	2021-02-03	1	19.8	2021-05-03	28	12.7143		7.8	5.9	P4		135.759	135.759
								-44291
1	A	0	399597	2021-02-03	NoT	18.5	2021-05-05	30	13				A0		0	0
2	A	1	399598	2021-02-03	21	19.9	2021-05-05	30	13		2.7	2.7	A1		9.8415	9.8415	0
3	A	2	399599	2021-02-03	DF	20.8	2021-05-05	30	13				A2		0	0
4	A	3	399600	2021-02-03	FG	19	2021-05-05	30	13		0	0	A3		0	0
5	A	4	399601	2021-02-03	21	18.5	2021-05-05	30	13		10.7	8.4	A4		377.496	377.496
6							2021-05-05	30
7	B	1	399603	2021-02-03	FIH	18.7	2021-05-05	30	13		6	5.9	B1		104.43	104.43
6							2021-05-05	30
9	B	3	399605	2021-02-03	FG	21.2	2021-05-05	30	13		7.2	4	B3		57.6	57.6
10	B	4	399606	2021-02-03	FIH	21.2	2021-05-05	30	13		0	0	B4		0	0
11	C	0	399607	2021-02-03	DF	19.4	2021-05-05	30	13		0	0	C0		0	0	0
12	C	1	399608	2021-02-03	DF	19.8	2021-05-05	30	13				C1		0	0	0
13	C	2	399609	2021-02-03	FG	19.8	2021-05-05	30	13		7.9	7.7	C2		234.196	234.196
14	C	3	399610	2021-02-03	DF	19.5	2021-05-05	30	13				C3		0	0	0
15	C	4	399611	2021-02-03	1	20.1	2021-05-05	30	13		13.6	9.8	C4		653.072	653.072	0
16	D	0	399612	2021-02-03	21	18.6	2021-05-05	30	13		11.3	8.6	D0		417.874	417.874
17	D	1	399613	2021-02-03	5	20.4	2021-05-05	30	13		0	0	D1		0	0
18	D	2	399614	2021-02-03	1	18.8	2021-05-05	30	13		9.9	5.6	D2		155.232	155.232
19	D	3	399615	2021-02-03	5	21.1	2021-05-05	30	13		4.8	4.7	D3		53.016	53.016
20	D	4	399616	2021-02-03	1	18.8	2021-05-05	30	13		0	0	D4		0	0
21	E	0	399617	2021-02-03	21	19.6	2021-05-05	30	13		9.4	8.3	E0		323.783	386.283	62.5	5	5
22	E	1	399618	2021-02-03	21	20.3	2021-05-05	30	13		12	10.4	E1		648.96	648.96
23	E	2	399619	2021-02-03	21	18.4	2021-05-05	30	13		14.3	9	E2		579.15	579.15
24	E	3	399620	2021-02-03	5	21.1	2021-05-05	30	13		13.5	7.5	E3		379.688	379.688
25	E	4	399621	2021-02-03	FIH	18	2021-05-05	30	13		5.7	4.8	E4		65.664	65.664
26	F	0	399622	2021-02-03	NoT	18.7	2021-05-05	30	13				F0		0	0	0
27	F	1	399623	2021-02-03	FG	19.3	2021-05-05	30	13		9.1	6.8	F1		210.392	210.392
28	F	2	399624	2021-02-03	1	19.4	2021-05-05	30	13		2.6	2.6	F2		8.788	8.788					IP?
29	F	3	399625	2021-02-03	1	20.5	2021-05-05	30	13		9.5	5.1	F3		123.547	123.547	0
30	F	4	399626	2021-02-03	NoT	21.4	2021-05-05	30	13				F4		0	0
31							2021-05-05	30
32	G	1	399628	2021-02-03	5	21.2	2021-05-05	30	13		7.7	3.7	G1		52.7065	52.7065
33	G	2	399629	2021-02-03	5	18.5	2021-05-05	30	13		9.3	8.3	G2		320.339	320.339
34	G	3	399630	2021-02-03	VHL	21	2021-05-05	30	13		7.8	4.4	G3		75.504	75.504
35	G	4	399631	2021-02-03	FG	19.1	2021-05-05	30	13		0	0	G4		0	0
36	H	0	399632	2021-02-03	1	19.7	2021-05-05	30	13				H0		0	ip	0
37	H	1	399633	2021-02-03	NoT	20.8	2021-05-05	30	13		8.5	7.3	H1		226.482	226.482	0
38	H	2	399634	2021-02-03	FG	19	2021-05-05	30	13		6.3	4.2	H2		55.566	55.566
39	H	3	399635	2021-02-03	VHL	20.4	2021-05-05	30	13				H3		0	0
40	H	4	399636	2021-02-03	DF	19	2021-05-05	30	13				H4		0	0
41	I	0	399637	2021-02-03	NoT	20.4	2021-05-05	30	13				I0		0	0	0
42	I	1	399638	2021-02-03	FIH	19.8	2021-05-05	30	13		0	0	I1		0	0
43	I	2	399639	2021-02-03	FIH	19.6	2021-05-05	30	13		6.7	5.6	I2		105.056	105.056
44	I	3	399640	2021-02-03	1	19.4	2021-05-05	30	13		4.6	3.4	I3		26.588	26.588
45	I	4	399641	2021-02-03	21	18.7	2021-05-05	30	13		14.8	9	I4		599.4	599.4
46	J	0	399642	2021-02-03	VHL	19.1	2021-05-05	30	13		12	8.1	J0		393.66	393.66
47	J	1	399643	2021-02-03	1	20.5	2021-05-05	30	13		5.9	5.5	J1		89.2375	89.2375	0
48	J	2	399644	2021-02-03	VHL	20.9	2021-05-05	30	13		4.8	4.4	J2		46.464	46.464
49	J	3	399645	2021-02-03	FG	21.1	2021-05-05	30	13		0	0	J3		0	0	0
50	J	4	399646	2021-02-03	5	20.9	2021-05-05	30	13		7.3	6.5	J4		154.212	154.212
51	K	0	399647	2021-02-03	DF	19.2	2021-05-05	30	13		2.6	2.6	K0		8.788	8.788
52	K	1	399648	2021-02-03	DF	20.9	2021-05-05	30	13		10.1	7.6	K1		291.688	291.688
53	K	2	399649	2021-02-03	21	19.9	2021-05-05	30	13		0	0	K2		0	0
54	K	3	399650	2021-02-03	FIH?	20.7	2021-05-05	30	13		5.6	4	K3		44.8	59.6955	14.8955	3.1	3.1
55	K	4	399651	2021-02-03	VHL?	17.3	2021-05-05	30	13		0	0	K4		0	0
56	L	0	399652	2021-02-03	DF	19.9	2021-05-05	30	13				L0		0	0
57	L	1	399653	2021-02-03	FG	21.4	2021-05-05	30	13				L1		0	0
58	L	2	399654	2021-02-03	DF	20.1	2021-05-05	30	13				L2		0	0
59	L	3	399655	2021-02-03	DF	19.1	2021-05-05	30	13		6.9	5.2	L3		93.288	93.288	0
60	L	4	399656	2021-02-03	FG	19.8	2021-05-05	30	13		10.7	5.1	L4		139.153	139.153
61	M	0	399657	2021-02-03	VHL	18.6	2021-05-05	30	13		10.1	6.4	M0		206.848	206.848	0
62	M	1	399658	2021-02-03	21	16.8	2021-05-05	30	13		10.9	10.8	M1		635.688	635.688
63	M	2	399659	2021-02-03	21	19.8	2021-05-05	30	13		0	0	M2		0	0
64	M	3	399660	2021-02-03	VHL	21.5	2021-05-05	30	13				M3		0	0	0
65	M	4	399661	2021-02-03	VHL	18.3	2021-05-05	30	13				M4		0	0
66	N	0	399662	2021-02-03	NOT	19.5	2021-05-05	30	13				N0		0	0
67	N	1	399663	2021-02-03	FIH	20.9	2021-05-05	30	13		10.4	8.6	N1		384.592	384.592	0
68	N	2	399664	2021-02-03	VHL	19.6	2021-05-05	30	13		11.4	8	N2		364.8	364.8
69	N	3	399665	2021-02-03	5	18.7	2021-05-05	30	13				N3		0	dead	0
70	N	4	399666	2021-02-03	VHL	19.1	2021-05-05	30	13				N4		0	0
71	O	0	399667	2021-02-03	FG	17.5	2021-05-05	30	13		7.3	6.1	O0		135.816	135.816
72	O	1	399668	2021-02-03	NOT	21	2021-05-05	30	13				O1		0	0
73	O	2	399669	2021-02-03	FIH	19	2021-05-05	30	13		0	0	O2		0	0
74	O	3	399670	2021-02-03	FIH	17	2021-05-05	30	13		6.4	6.2	O3		123.008	123.008
75	O	4	399671	2021-02-03	1	20.3	2021-05-05	30	13		9.4	8.5	O4		339.575	339.575	0
76							2021-05-05	30
77	P	2	399673	2021-02-03	5	19.5	2021-05-05	30	13		7.3	5.7	P1		118.588	118.588
78	P	3	399674	2021-02-03	5	18.7	2021-05-05	30	13		6.5	5.7	P2		105.593	105.593
79	P	4	399675	2021-02-03	FIH	19.6	2021-05-05	30	13		9.7	8.5	P3		350.412	350.412
80	P	5	399676	2021-02-03	1	19.8	2021-05-05	30	13		0	0	P4		0	0
								-44291
1	A	0	399597	2021-02-03	NoT	18.5	2021-05-08	33	13.4286				A0		0	0
2	A	1	399598	2021-02-03	21	19.9	2021-05-08	33	13.4286		5.1	4.8	A1		58.752	58.752	0
3	A	2	399599	2021-02-03	DF	20.8	2021-05-08	33	13.4286				A2		0	0
4	A	3	399600	2021-02-03	FG	19	2021-05-08	33	13.4286		3.9	3	A3		17.55	17.55
5	A	4	399601	2021-02-03	21	18.5	2021-05-08	33	13.4286		12.8	11.3	A4		817.216	817.216
6							2021-05-08	33
7	B	1	399603	2021-02-03	FIH	18.7	2021-05-08	33	13.4286		8.4	8	B1		268.8	268.8
6							2021-05-08	33
9	B	3	399605	2021-02-03	FG	21.2	2021-05-08	33	13.4286		9.1	6.5	B3		192.237	192.237
10	B	4	399606	2021-02-03	FIH	21.2	2021-05-08	33	13.4286		0	0	B4		0	0
11	C	0	399607	2021-02-03	DF	19.4	2021-05-08	33	13.4286		2	2	C0		4	8	4	2	2
12	C	1	399608	2021-02-03	DF	19.8	2021-05-08	33	13.4286				C1		0	0	0
13	C	2	399609	2021-02-03	FG	19.8	2021-05-08	33	13.4286		10.5	10.5	C2		578.812	578.812
14	C	3	399610	2021-02-03	DF	19.5	2021-05-08	33	13.4286				C3		0	0	0
15	C	4	399611	2021-02-03	1	20.1	2021-05-08	33	13.4286		0	0	C4		0	0	0
16	D	0	399612	2021-02-03	21	18.6	2021-05-08	33	13.4286		16.6	10.9	D0		986.123	986.123
17	D	1	399613	2021-02-03	5	20.4	2021-05-08	33	13.4286		0	0	D1		0	0
18	D	2	399614	2021-02-03	1	18.8	2021-05-08	33	13.4286		13.5	7.5	D2		379.688	379.688
19	D	3	399615	2021-02-03	5	21.1	2021-05-08	33	13.4286		6.1	5.8	D3		102.602	102.602
20	D	4	399616	2021-02-03	1	18.8	2021-05-08	33	13.4286		2.5	2.5	D4		7.8125	7.8125
21	E	0	399617	2021-02-03	21	19.6	2021-05-08	33	13.4286		10.8	10.4	E0		584.064	584.064	0		5
22	E	1	399618	2021-02-03	21	20.3	2021-05-08	33	13.4286				E1		0	0
23	E	2	399619	2021-02-03	21	18.4	2021-05-08	33	13.4286				E2		0	0
24	E	3	399620	2021-02-03	5	21.1	2021-05-08	33	13.4286		16.4	10.3	E3		869.938	869.938
25	E	4	399621	2021-02-03	FIH	18	2021-05-08	33	13.4286		8	5.8	E4		134.56	134.56
26	F	0	399622	2021-02-03	NoT	18.7	2021-05-08	33	13.4286				F0		0	0	0
27	F	1	399623	2021-02-03	FG	19.3	2021-05-08	33	13.4286		12.2	9.4	F1		538.996	538.996
28	F	2	399624	2021-02-03	1	19.4	2021-05-08	33	13.4286				F2		0	IP					IP?
29	F	3	399625	2021-02-03	1	20.5	2021-05-08	33	13.4286		14.8	9.1	F3		612.794	612.794	0
30	F	4	399626	2021-02-03	NoT	21.4	2021-05-08	33	13.4286				F4		0	0
31							2021-05-08	33
32	G	1	399628	2021-02-03	5	21.2	2021-05-08	33	13.4286		10.1	5.5	G1		152.762	152.762
33	G	2	399629	2021-02-03	5	18.5	2021-05-08	33	13.4286		10.6	10.1	G2		540.653	540.653
34	G	3	399630	2021-02-03	VHL	21	2021-05-08	33	13.4286		10.5	6.4	G3		215.04	215.04
35	G	4	399631	2021-02-03	FG	19.1	2021-05-08	33	13.4286		0	0	G4		0	0
36	H	0	399632	2021-02-03	1	19.7	2021-05-08	33	13.4286				H0		0	ip	0
37	H	1	399633	2021-02-03	NoT	20.8	2021-05-08	33	13.4286		9.5	8.9	H1		376.248	376.248	0
38	H	2	399634	2021-02-03	FG	19	2021-05-08	33	13.4286		8	6.7	H2		179.56	179.56
39	H	3	399635	2021-02-03	VHL	20.4	2021-05-08	33	13.4286				H3		0	0
40	H	4	399636	2021-02-03	DF	19	2021-05-08	33	13.4286				H4		0	0
41	I	0	399637	2021-02-03	NoT	20.4	2021-05-08	33	13.4286				I0		0	0	0
42	I	1	399638	2021-02-03	FIH	19.8	2021-05-08	33	13.4286		0	0	I1		0	0
43	I	2	399639	2021-02-03	FIH	19.6	2021-05-08	33	13.4286		11.1	9.7	I2		522.199	522.199
44	I	3	399640	2021-02-03	1	19.4	2021-05-08	33	13.4286		6.2	4.3	I3		57.319	57.319
45	I	4	399641	2021-02-03	21	18.7	2021-05-08	33	13.4286				I4		0	0
46	J	0	399642	2021-02-03	VHL	19.1	2021-05-08	33	13.4286		13.8	10	J0		690	690
47	J	1	399643	2021-02-03	1	20.5	2021-05-08	33	13.4286		8.3	7.5	J1		233.438	267.898	34.4605	4.1	4.1
48	J	2	399644	2021-02-03	VHL	20.9	2021-05-08	33	13.4286		7.6	6.9	J2		180.918	180.918
49	J	3	399645	2021-02-03	FG	21.1	2021-05-08	33	13.4286		0	0	J3		0	0	0
50	J	4	399646	2021-02-03	5	20.9	2021-05-08	33	13.4286		9.3	9.2	J4		393.576	393.576
51	K	0	399647	2021-02-03	DF	19.2	2021-05-08	33	13.4286		3.1	2.9	K0		13.0355	13.0355
52	K	1	399648	2021-02-03	DF	20.9	2021-05-08	33	13.4286		11.9	8.1	K1		390.38	390.38
53	K	2	399649	2021-02-03	21	19.9	2021-05-08	33	13.4286		0	0	K2		0	0
54	K	3	399650	2021-02-03	FIH?	20.7	2021-05-08	33	13.4286		12	11	K3		726	726	0
55	K	4	399651	2021-02-03	VHL?	17.3	2021-05-08	33	13.4286		0	0	K4		0	0
56	L	0	399652	2021-02-03	DF	19.9	2021-05-08	33	13.4286				L0		0	0
57	L	1	399653	2021-02-03	FG	21.4	2021-05-08	33	13.4286				L1		0	0
58	L	2	399654	2021-02-03	DF	20.1	2021-05-08	33	13.4286				L2		0	0
59	L	3	399655	2021-02-03	DF	19.1	2021-05-08	33	13.4286		9	7.4	L3		246.42	246.42	0
60	L	4	399656	2021-02-03	FG	19.8	2021-05-08	33	13.4286		12.1	8.5	L4		437.112	437.112
61	M	0	399657	2021-02-03	VHL	18.6	2021-05-08	33	13.4286		12.1	8	M0		387.2	387.2	0
62	M	1	399658	2021-02-03	21	16.8	2021-05-08	33	13.4286				M1		0	0
63	M	2	399659	2021-02-03	21	19.8	2021-05-08	33	13.4286		0	0	M2		0	0
64	M	3	399660	2021-02-03	VHL	21.5	2021-05-08	33	13.4286				M3		0	0	0
65	M	4	399661	2021-02-03	VHL	18.3	2021-05-08	33	13.4286				M4		0	0
66	N	0	399662	2021-02-03	NOT	19.5	2021-05-08	33	13.4286				N0		0	0
67	N	1	399663	2021-02-03	FIH	20.9	2021-05-08	33	13.4286		12.3	10.9	N1		730.682	730.682	0
68	N	2	399664	2021-02-03	VHL	19.6	2021-05-08	33	13.4286		13.9	10.8	N2		810.648	810.648
69	N	3	399665	2021-02-03	5	18.7	2021-05-08	33	13.4286				N3		0	dead	0
70	N	4	399666	2021-02-03	VHL	19.1	2021-05-08	33	13.4286				N4		0	0
71	O	0	399667	2021-02-03	FG	17.5	2021-05-08	33	13.4286		8.7	6.9	O0		207.104	207.104
72	O	1	399668	2021-02-03	NOT	21	2021-05-08	33	13.4286				O1		0	0
73	O	2	399669	2021-02-03	FIH	19	2021-05-08	33	13.4286		4.4	4.3	O2		40.678	40.678
74	O	3	399670	2021-02-03	FIH	17	2021-05-08	33	13.4286		8.1	8	O3		259.2	259.2
75	O	4	399671	2021-02-03	1	20.3	2021-05-08	33	13.4286		11.1	9.7	O4		522.199	522.199	0
76							2021-05-08	33
77	P	2	399673	2021-02-03	5	19.5	2021-05-08	33	13.4286		10.2	8.4	P1		359.856	359.856
78	P	3	399674	2021-02-03	5	18.7	2021-05-08	33	13.4286		9.6	6.8	P2		221.952	221.952
79	P	4	399675	2021-02-03	FIH	19.6	2021-05-08	33	13.4286		10.4	9.9	P3		509.652	509.652
80	P	5	399676	2021-02-03	1	19.8	2021-05-08	33	13.4286		0	0	P4		0	0
								-44291
1	A	0	399597	2021-02-03	NoT	18.5	2021-05-10	35	13.7143				A0		0	0
2	A	1	399598	2021-02-03	21	19.9	2021-05-10	35	13.7143		6.1	5.6	A1		95.648	95.648	0
3	A	2	399599	2021-02-03	DF	20.8	2021-05-10	35	13.7143				A2		0	0
4	A	3	399600	2021-02-03	FG	19	2021-05-10	35	13.7143		4.2	3.2	A3		21.504	21.504
5	A	4	399601	2021-02-03	21	18.5	2021-05-10	35	13.7143				A4		0	0
6							2021-05-10	35
7	B	1	399603	2021-02-03	FIH	18.7	2021-05-10	35	13.7143		10.9	8.9	B1		431.695	431.695
6							2021-05-10	35
9	B	3	399605	2021-02-03	FG	21.2	2021-05-10	35	13.7143		9.2	7.2	B3		238.464	238.464
10	B	4	399606	2021-02-03	FIH	21.2	2021-05-10	35	13.7143		0	0	B4		0	0
11	C	0	399607	2021-02-03	DF	19.4	2021-05-10	35	13.7143		2.4	2.4	C0		6.912	6.912	0
12	C	1	399608	2021-02-03	DF	19.8	2021-05-10	35	13.7143				C1		0	0	0
13	C	2	399609	2021-02-03	FG	19.8	2021-05-10	35	13.7143				C2		0	0
14	C	3	399610	2021-02-03	DF	19.5	2021-05-10	35	13.7143				C3		0	0	0
15	C	4	399611	2021-02-03	1	20.1	2021-05-10	35	13.7143				C4		0	0	0
16	D	0	399612	2021-02-03	21	18.6	2021-05-10	35	13.7143				D0		0	0
17	D	1	399613	2021-02-03	5	20.4	2021-05-10	35	13.7143		0	0	D1		0	0
18	D	2	399614	2021-02-03	1	18.8	2021-05-10	35	13.7143		14.3	9.4	D2		631.774	631.774
19	D	3	399615	2021-02-03	5	21.1	2021-05-10	35	13.7143		6.1	5.7	D3		99.0945	99.0945
20	D	4	399616	2021-02-03	1	18.8	2021-05-10	35	13.7143		3.9	3.3	D4		21.2355	21.2355
21	E	0	399617	2021-02-03	21	19.6	2021-05-10	35	13.7143				E0		0	0	0
22	E	1	399618	2021-02-03	21	20.3	2021-05-10	35	13.7143				E1		0	0
23	E	2	399619	2021-02-03	21	18.4	2021-05-10	35	13.7143				E2		0	0
24	E	3	399620	2021-02-03	5	21.1	2021-05-10	35	13.7143				E3		0	0
25	E	4	399621	2021-02-03	FIH	18	2021-05-10	35	13.7143		9	7.2	E4		233.28	233.28
26	F	0	399622	2021-02-03	NoT	18.7	2021-05-10	35	13.7143				F0		0	0	0
27	F	1	399623	2021-02-03	FG	19.3	2021-05-10	35	13.7143				F1		0	0
28	F	2	399624	2021-02-03	1	19.4	2021-05-10	35	13.7143				F2		0	IP					IP?
29	F	3	399625	2021-02-03	1	20.5	2021-05-10	35	13.7143				F3		0	0	0
30	F	4	399626	2021-02-03	NoT	21.4	2021-05-10	35	13.7143				F4		0	0
31							2021-05-10	35
32	G	1	399628	2021-02-03	5	21.2	2021-05-10	35	13.7143		10.2	5.9	G1		177.531	177.531
33	G	2	399629	2021-02-03	5	18.5	2021-05-10	35	13.7143				G2		0	0
34	G	3	399630	2021-02-03	VHL	21	2021-05-10	35	13.7143		12.1	10.1	G3		617.16	617.16
35	G	4	399631	2021-02-03	FG	19.1	2021-05-10	35	13.7143		0	0	G4		0	0
36	H	0	399632	2021-02-03	1	19.7	2021-05-10	35	13.7143				H0		0	ip	0
37	H	1	399633	2021-02-03	NoT	20.8	2021-05-10	35	13.7143		12.8	9.5	H1		577.6	577.6	0
38	H	2	399634	2021-02-03	FG	19	2021-05-10	35	13.7143		10.6	7.5	H2		298.125	298.125
39	H	3	399635	2021-02-03	VHL	20.4	2021-05-10	35	13.7143				H3		0	0
40	H	4	399636	2021-02-03	DF	19	2021-05-10	35	13.7143				H4		0	0
41	I	0	399637	2021-02-03	NoT	20.4	2021-05-10	35	13.7143				I0		0	0	0
42	I	1	399638	2021-02-03	FIH	19.8	2021-05-10	35	13.7143		0	0	I1		0	0
43	I	2	399639	2021-02-03	FIH	19.6	2021-05-10	35	13.7143				I2		0	0
44	I	3	399640	2021-02-03	1	19.4	2021-05-10	35	13.7143		6.8	5.2	I3		91.936	91.936
45	I	4	399641	2021-02-03	21	18.7	2021-05-10	35	13.7143				I4		0	0
46	J	0	399642	2021-02-03	VHL	19.1	2021-05-10	35	13.7143				J0		0	0
47	J	1	399643	2021-02-03	1	20.5	2021-05-10	35	13.7143		10.3	9.5	J1		464.788	559.558	94.77	6.5	5.4
48	J	2	399644	2021-02-03	VHL	20.9	2021-05-10	35	13.7143		8.4	8.1	J2		275.562	275.562
49	J	3	399645	2021-02-03	FG	21.1	2021-05-10	35	13.7143		0	0	J3		0	0	0
50	J	4	399646	2021-02-03	5	20.9	2021-05-10	35	13.7143		10.9	10.2	J4		567.018	567.018
51	K	0	399647	2021-02-03	DF	19.2	2021-05-10	35	13.7143		3.5	2.9	K0		14.7175	14.7175
52	K	1	399648	2021-02-03	DF	20.9	2021-05-10	35	13.7143		12.7	8.6	K1		469.646	469.646
53	K	2	399649	2021-02-03	21	19.9	2021-05-10	35	13.7143		0	0	K2		0	0
54	K	3	399650	2021-02-03	FIH?	20.7	2021-05-10	35	13.7143				K3		0	0	0
55	K	4	399651	2021-02-03	VHL?	17.3	2021-05-10	35	13.7143		0	0	K4		0	0
56	L	0	399652	2021-02-03	DF	19.9	2021-05-10	35	13.7143				L0		0	0
57	L	1	399653	2021-02-03	FG	21.4	2021-05-10	35	13.7143				L1		0	0
58	L	2	399654	2021-02-03	DF	20.1	2021-05-10	35	13.7143				L2		0	0
59	L	3	399655	2021-02-03	DF	19.1	2021-05-10	35	13.7143		10.2	8.6	L3		377.196	377.196	0
60	L	4	399656	2021-02-03	FG	19.8	2021-05-10	35	13.7143		16.8	9.7	L4		790.356	790.356
61	M	0	399657	2021-02-03	VHL	18.6	2021-05-10	35	13.7143		16.8	8.5	M0		606.9	606.9	0
62	M	1	399658	2021-02-03	21	16.8	2021-05-10	35	13.7143				M1		0	0
63	M	2	399659	2021-02-03	21	19.8	2021-05-10	35	13.7143		0	0	M2		0	0
64	M	3	399660	2021-02-03	VHL	21.5	2021-05-10	35	13.7143				M3		0	0	0
65	M	4	399661	2021-02-03	VHL	18.3	2021-05-10	35	13.7143				M4		0	0
66	N	0	399662	2021-02-03	NOT	19.5	2021-05-10	35	13.7143				N0		0	0
67	N	1	399663	2021-02-03	FIH	20.9	2021-05-10	35	13.7143				N1		0	0	0
68	N	2	399664	2021-02-03	VHL	19.6	2021-05-10	35	13.7143				N2		0	0
69	N	3	399665	2021-02-03	5	18.7	2021-05-10	35	13.7143				N3		0	dead	0
70	N	4	399666	2021-02-03	VHL	19.1	2021-05-10	35	13.7143				N4		0	0
71	O	0	399667	2021-02-03	FG	17.5	2021-05-10	35	13.7143		7.8	7.7	O0		231.231	231.231
72	O	1	399668	2021-02-03	NOT	21	2021-05-10	35	13.7143				O1		0	0
73	O	2	399669	2021-02-03	FIH	19	2021-05-10	35	13.7143		5.6	4.4	O2		54.208	54.208
74	O	3	399670	2021-02-03	FIH	17	2021-05-10	35	13.7143		10.8	10.6	O3		606.744	606.744
75	O	4	399671	2021-02-03	1	20.3	2021-05-10	35	13.7143				O4		0	0	0
76							2021-05-10	35
77	P	2	399673	2021-02-03	5	19.5	2021-05-10	35	13.7143		14.4	9.8	P1		691.488	691.488
78	P	3	399674	2021-02-03	5	18.7	2021-05-10	35	13.7143		8.9	7.9	P2		277.725	277.725
79	P	4	399675	2021-02-03	FIH	19.6	2021-05-10	35	13.7143				P3		0	0
80	P	5	399676	2021-02-03	1	19.8	2021-05-10	35	13.7143		0	0	P4		0	0
								-44291
1	A	0	399597	2021-02-03	NoT	18.5	2021-05-12	37	14				A0		0	0
2	A	1	399598	2021-02-03	21	19.9	2021-05-12	37	14		8.9	8.4	A1		313.992	313.992	0
3	A	2	399599	2021-02-03	DF	20.8	2021-05-12	37	14				A2		0	0
4	A	3	399600	2021-02-03	FG	19	2021-05-12	37	14		4.4	4.1	A3		36.982	36.982
5	A	4	399601	2021-02-03	21	18.5	2021-05-12	37	14				A4		0	0
6							2021-05-12	37
7	B	1	399603	2021-02-03	FIH	18.7	2021-05-12	37	14		11.3	10.2	B1		587.826	587.826
6							2021-05-12	37
9	B	3	399605	2021-02-03	FG	21.2	2021-05-12	37	14		10.7	7.9	B3		333.894	333.894
10	B	4	399606	2021-02-03	FIH	21.2	2021-05-12	37	14		0	0	B4		0	0
11	C	0	399607	2021-02-03	DF	19.4	2021-05-12	37	14		3.2	3.1	C0		15.376	15.376	0
12	C	1	399608	2021-02-03	DF	19.8	2021-05-12	37	14				C1		0	0	0
13	C	2	399609	2021-02-03	FG	19.8	2021-05-12	37	14				C2		0	0
14	C	3	399610	2021-02-03	DF	19.5	2021-05-12	37	14				C3		0	0	0
15	C	4	399611	2021-02-03	1	20.1	2021-05-12	37	14				C4		0	0	0
16	D	0	399612	2021-02-03	21	18.6	2021-05-12	37	14				D0		0	0
17	D	1	399613	2021-02-03	5	20.4	2021-05-12	37	14		0	0	D1		0	0
18	D	2	399614	2021-02-03	1	18.8	2021-05-12	37	14				D2		0	0
19	D	3	399615	2021-02-03	5	21.1	2021-05-12	37	14		6.5	5.6	D3		101.92	101.92
20	D	4	399616	2021-02-03	1	18.8	2021-05-12	37	14		5.2	4.6	D4		55.016	55.016
21	E	0	399617	2021-02-03	21	19.6	2021-05-12	37	14				E0		0	0	0
22	E	1	399618	2021-02-03	21	20.3	2021-05-12	37	14				E1		0	0
23	E	2	399619	2021-02-03	21	18.4	2021-05-12	37	14				E2		0	0
24	E	3	399620	2021-02-03	5	21.1	2021-05-12	37	14				E3		0	0
25	E	4	399621	2021-02-03	FIH	18	2021-05-12	37	14		11.3	8.3	E4		389.229	389.229
26	F	0	399622	2021-02-03	NoT	18.7	2021-05-12	37	14				F0		0	0	0
27	F	1	399623	2021-02-03	FG	19.3	2021-05-12	37	14				F1		0	0
28	F	2	399624	2021-02-03	1	19.4	2021-05-12	37	14				F2		0	IP					IP?
29	F	3	399625	2021-02-03	1	20.5	2021-05-12	37	14				F3		0	0	0
30	F	4	399626	2021-02-03	NoT	21.4	2021-05-12	37	14				F4		0	0
31							2021-05-12	37
32	G	1	399628	2021-02-03	5	21.2	2021-05-12	37	14		11.4	7.8	G1		346.788	346.788
33	G	2	399629	2021-02-03	5	18.5	2021-05-12	37	14				G2		0	0
34	G	3	399630	2021-02-03	VHL	21	2021-05-12	37	14				G3		0	0
35	G	4	399631	2021-02-03	FG	19.1	2021-05-12	37	14		0	0	G4		0	0
36	H	0	399632	2021-02-03	1	19.7	2021-05-12	37	14				H0		0	ip	0
37	H	1	399633	2021-02-03	NoT	20.8	2021-05-12	37	14				H1		0	0	0
38	H	2	399634	2021-02-03	FG	19	2021-05-12	37	14		14.2	9.4	H2		627.356	627.356
39	H	3	399635	2021-02-03	VHL	20.4	2021-05-12	37	14				H3		0	0
40	H	4	399636	2021-02-03	DF	19	2021-05-12	37	14				H4		0	0
41	I	0	399637	2021-02-03	NoT	20.4	2021-05-12	37	14				I0		0	0	0
42	I	1	399638	2021-02-03	FIH	19.8	2021-05-12	37	14		0	0	I1		0	0
43	I	2	399639	2021-02-03	FIH	19.6	2021-05-12	37	14				I2		0	0
44	I	3	399640	2021-02-03	1	19.4	2021-05-12	37	14		6.8	5.1	I3		88.434	88.434
45	I	4	399641	2021-02-03	21	18.7	2021-05-12	37	14				I4		0	0
46	J	0	399642	2021-02-03	VHL	19.1	2021-05-12	37	14				J0		0	0
47	J	1	399643	2021-02-03	1	20.5	2021-05-12	37	14				J1		0	0	0
48	J	2	399644	2021-02-03	VHL	20.9	2021-05-12	37	14		12.2	9.5	J2		550.525	550.525
49	J	3	399645	2021-02-03	FG	21.1	2021-05-12	37	14		0	0	J3		0	0	0
50	J	4	399646	2021-02-03	5	20.9	2021-05-12	37	14				J4		0	0
51	K	0	399647	2021-02-03	DF	19.2	2021-05-12	37	14		3.6	3.2	K0		18.432	18.432
52	K	1	399648	2021-02-03	DF	20.9	2021-05-12	37	14		13.4	8.6	K1		495.532	495.532
53	K	2	399649	2021-02-03	21	19.9	2021-05-12	37	14		0	0	K2		0	0
54	K	3	399650	2021-02-03	FIH?	20.7	2021-05-12	37	14				K3		0	0	0
55	K	4	399651	2021-02-03	VHL?	17.3	2021-05-12	37	14		0	0	K4		0	0
56	L	0	399652	2021-02-03	DF	19.9	2021-05-12	37	14				L0		0	0
57	L	1	399653	2021-02-03	FG	21.4	2021-05-12	37	14				L1		0	0
58	L	2	399654	2021-02-03	DF	20.1	2021-05-12	37	14				L2		0	0
59	L	3	399655	2021-02-03	DF	19.1	2021-05-12	37	14		9.8	9.7	L3		461.041	461.041	0
60	L	4	399656	2021-02-03	FG	19.8	2021-05-12	37	14				L4		0	0
61	M	0	399657	2021-02-03	VHL	18.6	2021-05-12	37	14				M0		0	0	0
62	M	1	399658	2021-02-03	21	16.8	2021-05-12	37	14				M1		0	0
63	M	2	399659	2021-02-03	21	19.8	2021-05-12	37	14		0	0	M2		0	0
64	M	3	399660	2021-02-03	VHL	21.5	2021-05-12	37	14				M3		0	0	0
65	M	4	399661	2021-02-03	VHL	18.3	2021-05-12	37	14				M4		0	0
66	N	0	399662	2021-02-03	NOT	19.5	2021-05-12	37	14				N0		0	0
67	N	1	399663	2021-02-03	FIH	20.9	2021-05-12	37	14				N1		0	0	0
68	N	2	399664	2021-02-03	VHL	19.6	2021-05-12	37	14				N2		0	0
69	N	3	399665	2021-02-03	5	18.7	2021-05-12	37	14				N3		0	dead	0
70	N	4	399666	2021-02-03	VHL	19.1	2021-05-12	37	14				N4		0	0
71	O	0	399667	2021-02-03	FG	17.5	2021-05-12	37	14		10.6	8.6	O0		391.988	391.988
72	O	1	399668	2021-02-03	NOT	21	2021-05-12	37	14				O1		0	0
73	O	2	399669	2021-02-03	FIH	19	2021-05-12	37	14		8	5.8	O2		134.56	134.56
74	O	3	399670	2021-02-03	FIH	17	2021-05-12	37	14				O3		0	0
75	O	4	399671	2021-02-03	1	20.3	2021-05-12	37	14				O4		0	0	0
76							2021-05-12	37
77	P	2	399673	2021-02-03	5	19.5	2021-05-12	37	14				P1		0	0
78	P	3	399674	2021-02-03	5	18.7	2021-05-12	37	14		10.5	9.8	P2		504.21	504.21
79	P	4	399675	2021-02-03	FIH	19.6	2021-05-12	37	14				P3		0	0
80	P	5	399676	2021-02-03	1	19.8	2021-05-12	37	14		0	0	P4		0	0
								-44291
1	A	0	399597	2021-02-03	NoT	18.5	2021-05-14	39	14.2857				A0		0	0
2	A	1	399598	2021-02-03	21	19.9	2021-05-14	39	14.2857		11	10.3	A1		583.495	583.495	0
3	A	2	399599	2021-02-03	DF	20.8	2021-05-14	39	14.2857				A2		0	0
4	A	3	399600	2021-02-03	FG	19	2021-05-14	39	14.2857		5.7	5.5	A3		86.2125	86.2125
5	A	4	399601	2021-02-03	21	18.5	2021-05-14	39	14.2857				A4		0	0
6							2021-05-14	39
7	B	1	399603	2021-02-03	FIH	18.7	2021-05-14	39	14.2857				B1		0	0
6							2021-05-14	39
9	B	3	399605	2021-02-03	FG	21.2	2021-05-14	39	14.2857		12.1	10.9	B3		718.8	718.8
10	B	4	399606	2021-02-03	FIH	21.2	2021-05-14	39	14.2857		0	0	B4		0	0
11	C	0	399607	2021-02-03	DF	19.4	2021-05-14	39	14.2857		3.9	3.9	C0		29.6595	29.6595	0
12	C	1	399608	2021-02-03	DF	19.8	2021-05-14	39	14.2857				C1		0	0	0
13	C	2	399609	2021-02-03	FG	19.8	2021-05-14	39	14.2857				C2		0	0
14	C	3	399610	2021-02-03	DF	19.5	2021-05-14	39	14.2857				C3		0	0	0
15	C	4	399611	2021-02-03	1	20.1	2021-05-14	39	14.2857				C4		0	0	0
16	D	0	399612	2021-02-03	21	18.6	2021-05-14	39	14.2857				D0		0	0
17	D	1	399613	2021-02-03	5	20.4	2021-05-14	39	14.2857		0	0	D1		0	0
18	D	2	399614	2021-02-03	1	18.8	2021-05-14	39	14.2857				D2		0	0
19	D	3	399615	2021-02-03	5	21.1	2021-05-14	39	14.2857		8.2	7.4	D3		224.516	224.516
20	D	4	399616	2021-02-03	1	18.8	2021-05-14	39	14.2857		6.1	5.8	D4		102.602	102.602
21	E	0	399617	2021-02-03	21	19.6	2021-05-14	39	14.2857				E0		0	0	0
22	E	1	399618	2021-02-03	21	20.3	2021-05-14	39	14.2857				E1		0	0
23	E	2	399619	2021-02-03	21	18.4	2021-05-14	39	14.2857				E2		0	0
24	E	3	399620	2021-02-03	5	21.1	2021-05-14	39	14.2857				E3		0	0
25	E	4	399621	2021-02-03	FIH	18	2021-05-14	39	14.2857		12.2	10.2	E4		634.644	634.644
26	F	0	399622	2021-02-03	NoT	18.7	2021-05-14	39	14.2857				F0		0	0	0
27	F	1	399623	2021-02-03	FG	19.3	2021-05-14	39	14.2857				F1		0	0
28	F	2	399624	2021-02-03	1	19.4	2021-05-14	39	14.2857				F2		0	0					IP?
29	F	3	399625	2021-02-03	1	20.5	2021-05-14	39	14.2857				F3		0	0	0
30	F	4	399626	2021-02-03	NoT	21.4	2021-05-14	39	14.2857				F4		0	0
31							2021-05-14	39
32	G	1	399628	2021-02-03	5	21.2	2021-05-14	39	14.2857		13	9.6	G1		599.04	599.04
33	G	2	399629	2021-02-03	5	18.5	2021-05-14	39	14.2857				G2		0	0
34	G	3	399630	2021-02-03	VHL	21	2021-05-14	39	14.2857				G3		0	0
35	G	4	399631	2021-02-03	FG	19.1	2021-05-14	39	14.2857		0	0	G4		0	0
36	H	0	399632	2021-02-03	1	19.7	2021-05-14	39	14.2857				H0		0	ip	0
37	H	1	399633	2021-02-03	NoT	20.8	2021-05-14	39	14.2857				H1		0	0	0
38	H	2	399634	2021-02-03	FG	19	2021-05-14	39	14.2857				H2		0	0
39	H	3	399635	2021-02-03	VHL	20.4	2021-05-14	39	14.2857				H3		0	0
40	H	4	399636	2021-02-03	DF	19	2021-05-14	39	14.2857				H4		0	0
41	I	0	399637	2021-02-03	NoT	20.4	2021-05-14	39	14.2857				I0		0	0	0
42	I	1	399638	2021-02-03	FIH	19.8	2021-05-14	39	14.2857		0	0	I1		0	0
43	I	2	399639	2021-02-03	FIH	19.6	2021-05-14	39	14.2857				I2		0	0
44	I	3	399640	2021-02-03	1	19.4	2021-05-14	39	14.2857		8.4	6.4	I3		172.032	172.032
45	I	4	399641	2021-02-03	21	18.7	2021-05-14	39	14.2857				I4		0	0
46	J	0	399642	2021-02-03	VHL	19.1	2021-05-14	39	14.2857				J0		0	0
47	J	1	399643	2021-02-03	1	20.5	2021-05-14	39	14.2857				J1		0	0	0
48	J	2	399644	2021-02-03	VHL	20.9	2021-05-14	39	14.2857		0	0	J2		0	0
49	J	3	399645	2021-02-03	FG	21.1	2021-05-14	39	14.2857		0	0	J3		0	0	0
50	J	4	399646	2021-02-03	5	20.9	2021-05-14	39	14.2857				J4		0	0
51	K	0	399647	2021-02-03	DF	19.2	2021-05-14	39	14.2857		3.5	3.5	K0		21.4375	21.4375
52	K	1	399648	2021-02-03	DF	20.9	2021-05-14	39	14.2857		13	9.5	K1		586.625	586.625
53	K	2	399649	2021-02-03	21	19.9	2021-05-14	39	14.2857		0	0	K2		0	0
54	K	3	399650	2021-02-03	FIH?	20.7	2021-05-14	39	14.2857				K3		0	0	0
55	K	4	399651	2021-02-03	VHL?	17.3	2021-05-14	39	14.2857		0	0	K4		0	0
56	L	0	399652	2021-02-03	DF	19.9	2021-05-14	39	14.2857				L0		0	0
57	L	1	399653	2021-02-03	FG	21.4	2021-05-14	39	14.2857				L1		0	0
58	L	2	399654	2021-02-03	DF	20.1	2021-05-14	39	14.2857				L2		0	0
59	L	3	399655	2021-02-03	DF	19.1	2021-05-14	39	14.2857		11.5	9.8	L3		552.23	552.23	0
60	L	4	399656	2021-02-03	FG	19.8	2021-05-14	39	14.2857				L4		0	0
61	M	0	399657	2021-02-03	VHL	18.6	2021-05-14	39	14.2857				M0		0	0	0
62	M	1	399658	2021-02-03	21	16.8	2021-05-14	39	14.2857				M1		0	0
63	M	2	399659	2021-02-03	21	19.8	2021-05-14	39	14.2857		0	0	M2		0	0
64	M	3	399660	2021-02-03	VHL	21.5	2021-05-14	39	14.2857				M3		0	0	0
65	M	4	399661	2021-02-03	VHL	18.3	2021-05-14	39	14.2857				M4		0	0
66	N	0	399662	2021-02-03	NOT	19.5	2021-05-14	39	14.2857				N0		0	0
67	N	1	399663	2021-02-03	FIH	20.9	2021-05-14	39	14.2857				N1		0	0	0
68	N	2	399664	2021-02-03	VHL	19.6	2021-05-14	39	14.2857				N2		0	0
69	N	3	399665	2021-02-03	5	18.7	2021-05-14	39	14.2857				N3		0	0	0
70	N	4	399666	2021-02-03	VHL	19.1	2021-05-14	39	14.2857				N4		0	0
71	O	0	399667	2021-02-03	FG	17.5	2021-05-14	39	14.2857		11.3	9.8	O0		542.626	542.626
72	O	1	399668	2021-02-03	NOT	21	2021-05-14	39	14.2857				O1		0	0
73	O	2	399669	2021-02-03	FIH	19	2021-05-14	39	14.2857		9.7	8	O2		310.4	310.4
74	O	3	399670	2021-02-03	FIH	17	2021-05-14	39	14.2857				O3		0	0
75	O	4	399671	2021-02-03	1	20.3	2021-05-14	39	14.2857				O4		0	0	0
76							2021-05-14	39
77	P	2	399673	2021-02-03	5	19.5	2021-05-14	39	14.2857				P1		0	0
78	P	3	399674	2021-02-03	5	18.7	2021-05-14	39	14.2857				P2		0	0
79	P	4	399675	2021-02-03	FIH	19.6	2021-05-14	39	14.2857				P3		0	0
80	P	5	399676	2021-02-03	1	19.8	2021-05-14	39	14.2857		0	0	P4		0	0
								-44291
1	A	0	399597	2021-02-03	NoT	18.5	2021-05-17	42	14.7143				A0		0	0
2	A	1	399598	2021-02-03	21	19.9	2021-05-17	42	14.7143				A1		0	0	0
3	A	2	399599	2021-02-03	DF	20.8	2021-05-17	42	14.7143				A2		0	0
4	A	3	399600	2021-02-03	FG	19	2021-05-17	42	14.7143		8.9	7.8	A3		270.738	270.738
5	A	4	399601	2021-02-03	21	18.5	2021-05-17	42	14.7143				A4		0	0
6							2021-05-17	42
7	B	1	399603	2021-02-03	FIH	18.7	2021-05-17	42	14.7143				B1		0	0
6							2021-05-17	42
9	B	3	399605	2021-02-03	FG	21.2	2021-05-17	42	14.7143				B3		0	0
10	B	4	399606	2021-02-03	FIH	21.2	2021-05-17	42	14.7143		0	0	B4		0	0
11	C	0	399607	2021-02-03	DF	19.4	2021-05-17	42	14.7143		6	5.2	C0		81.12	81.12	0
12	C	1	399608	2021-02-03	DF	19.8	2021-05-17	42	14.7143				C1		0	0	0
13	C	2	399609	2021-02-03	FG	19.8	2021-05-17	42	14.7143				C2		0	0
14	C	3	399610	2021-02-03	DF	19.5	2021-05-17	42	14.7143				C3		0	0	0
15	C	4	399611	2021-02-03	1	20.1	2021-05-17	42	14.7143				C4		0	0	0
16	D	0	399612	2021-02-03	21	18.6	2021-05-17	42	14.7143				D0		0	0
17	D	1	399613	2021-02-03	5	20.4	2021-05-17	42	14.7143		0	0	D1		0	0
18	D	2	399614	2021-02-03	1	18.8	2021-05-17	42	14.7143				D2		0	0
19	D	3	399615	2021-02-03	5	21.1	2021-05-17	42	14.7143		8.3	7.7	D3		246.054	246.054
20	D	4	399616	2021-02-03	1	18.8	2021-05-17	42	14.7143		7.7	7.5	D4		216.562	216.562
21	E	0	399617	2021-02-03	21	19.6	2021-05-17	42	14.7143				E0		0	0	0
22	E	1	399618	2021-02-03	21	20.3	2021-05-17	42	14.7143				E1		0	0
23	E	2	399619	2021-02-03	21	18.4	2021-05-17	42	14.7143				E2		0	0
24	E	3	399620	2021-02-03	5	21.1	2021-05-17	42	14.7143				E3		0	0
25	E	4	399621	2021-02-03	FIH	18	2021-05-17	42	14.7143				E4		0	0
26	F	0	399622	2021-02-03	NoT	18.7	2021-05-17	42	14.7143				F0		0	0	0
27	F	1	399623	2021-02-03	FG	19.3	2021-05-17	42	14.7143				F1		0	0
28	F	2	399624	2021-02-03	1	19.4	2021-05-17	42	14.7143				F2		0	0					IP?
29	F	3	399625	2021-02-03	1	20.5	2021-05-17	42	14.7143				F3		0	0	0
30	F	4	399626	2021-02-03	NoT	21.4	2021-05-17	42	14.7143				F4		0	0
31							2021-05-17	42
32	G	1	399628	2021-02-03	5	21.2	2021-05-17	42	14.7143				G1		0	0
33	G	2	399629	2021-02-03	5	18.5	2021-05-17	42	14.7143				G2		0	0
34	G	3	399630	2021-02-03	VHL	21	2021-05-17	42	14.7143				G3		0	0
35	G	4	399631	2021-02-03	FG	19.1	2021-05-17	42	14.7143		3	2.2	G4		7.26	7.26
36	H	0	399632	2021-02-03	1	19.7	2021-05-17	42	14.7143				H0		0	ip	0
37	H	1	399633	2021-02-03	NoT	20.8	2021-05-17	42	14.7143				H1		0	0	0
38	H	2	399634	2021-02-03	FG	19	2021-05-17	42	14.7143				H2		0	0
39	H	3	399635	2021-02-03	VHL	20.4	2021-05-17	42	14.7143				H3		0	0
40	H	4	399636	2021-02-03	DF	19	2021-05-17	42	14.7143				H4		0	0
41	I	0	399637	2021-02-03	NoT	20.4	2021-05-17	42	14.7143				I0		0	0	0
42	I	1	399638	2021-02-03	FIH	19.8	2021-05-17	42	14.7143		0	0	I1		0	0
43	I	2	399639	2021-02-03	FIH	19.6	2021-05-17	42	14.7143				I2		0	0
44	I	3	399640	2021-02-03	1	19.4	2021-05-17	42	14.7143		9.4	6.7	I3		210.983	210.983
45	I	4	399641	2021-02-03	21	18.7	2021-05-17	42	14.7143				I4		0	0
46	J	0	399642	2021-02-03	VHL	19.1	2021-05-17	42	14.7143				J0		0	0
47	J	1	399643	2021-02-03	1	20.5	2021-05-17	42	14.7143				J1		0	0	0
48	J	2	399644	2021-02-03	VHL	20.9	2021-05-17	42	14.7143				J2		0	0
49	J	3	399645	2021-02-03	FG	21.1	2021-05-17	42	14.7143		0	0	J3		0	0	0
50	J	4	399646	2021-02-03	5	20.9	2021-05-17	42	14.7143				J4		0	0
51	K	0	399647	2021-02-03	DF	19.2	2021-05-17	42	14.7143		3.8	3.8	K0		27.436	27.436
52	K	1	399648	2021-02-03	DF	20.9	2021-05-17	42	14.7143				K1		0	0
53	K	2	399649	2021-02-03	21	19.9	2021-05-17	42	14.7143		0	0	K2		0	0
54	K	3	399650	2021-02-03	FIH?	20.7	2021-05-17	42	14.7143				K3		0	0	0
55	K	4	399651	2021-02-03	VHL?	17.3	2021-05-17	42	14.7143		0	0	K4		0	0
56	L	0	399652	2021-02-03	DF	19.9	2021-05-17	42	14.7143				L0		0	0
57	L	1	399653	2021-02-03	FG	21.4	2021-05-17	42	14.7143				L1		0	0
58	L	2	399654	2021-02-03	DF	20.1	2021-05-17	42	14.7143				L2		0	0
59	L	3	399655	2021-02-03	DF	19.1	2021-05-17	42	14.7143				L3		0	0	0
60	L	4	399656	2021-02-03	FG	19.8	2021-05-17	42	14.7143				L4		0	0
61	M	0	399657	2021-02-03	VHL	18.6	2021-05-17	42	14.7143				M0		0	0	0
62	M	1	399658	2021-02-03	21	16.8	2021-05-17	42	14.7143				M1		0	0
63	M	2	399659	2021-02-03	21	19.8	2021-05-17	42	14.7143		0	0	M2		0	0
64	M	3	399660	2021-02-03	VHL	21.5	2021-05-17	42	14.7143				M3		0	0	0
65	M	4	399661	2021-02-03	VHL	18.3	2021-05-17	42	14.7143				M4		0	0
66	N	0	399662	2021-02-03	NOT	19.5	2021-05-17	42	14.7143				N0		0	0
67	N	1	399663	2021-02-03	FIH	20.9	2021-05-17	42	14.7143				N1		0	0	0
68	N	2	399664	2021-02-03	VHL	19.6	2021-05-17	42	14.7143				N2		0	0
69	N	3	399665	2021-02-03	5	18.7	2021-05-17	42	14.7143				N3		0	0	0
70	N	4	399666	2021-02-03	VHL	19.1	2021-05-17	42	14.7143				N4		0	0
71	O	0	399667	2021-02-03	FG	17.5	2021-05-17	42	14.7143				O0		0	0
72	O	1	399668	2021-02-03	NOT	21	2021-05-17	42	14.7143				O1		0	0
73	O	2	399669	2021-02-03	FIH	19	2021-05-17	42	14.7143		11.9	9.8	O2		571.438	571.438
74	O	3	399670	2021-02-03	FIH	17	2021-05-17	42	14.7143				O3		0	0
75	O	4	399671	2021-02-03	1	20.3	2021-05-17	42	14.7143				O4		0	0	0
76							2021-05-17	42
77	P	2	399673	2021-02-03	5	19.5	2021-05-17	42	14.7143				P1		0	0
78	P	3	399674	2021-02-03	5	18.7	2021-05-17	42	14.7143				P2		0	0
79	P	4	399675	2021-02-03	FIH	19.6	2021-05-17	42	14.7143				P3		0	0
80	P	5	399676	2021-02-03	1	19.8	2021-05-17	42	14.7143		0	0	P4		0	0
								-44291
1	A	0	399597	2021-02-03	NoT	18.5	2021-05-19	44	15				A0		0	0
2	A	1	399598	2021-02-03	21	19.9	2021-05-19	44	15				A1		0	0	0
3	A	2	399599	2021-02-03	DF	20.8	2021-05-19	44	15				A2		0	0
4	A	3	399600	2021-02-03	FG	19	2021-05-19	44	15		12.3	12.1	A3		900.422	900.422
5	A	4	399601	2021-02-03	21	18.5	2021-05-19	44	15				A4		0	0
6							2021-05-19	44
7	B	1	399603	2021-02-03	FIH	18.7	2021-05-19	44	15				B1		0	0
6							2021-05-19	44
9	B	3	399605	2021-02-03	FG	21.2	2021-05-19	44	15				B3		0	0
10	B	4	399606	2021-02-03	FIH	21.2	2021-05-19	44	15		0	0	B4		0	0
11	C	0	399607	2021-02-03	DF	19.4	2021-05-19	44	15		7.6	6.9	C0		180.918	180.918	0
12	C	1	399608	2021-02-03	DF	19.8	2021-05-19	44	15				C1		0	0	0
13	C	2	399609	2021-02-03	FG	19.8	2021-05-19	44	15				C2		0	0
14	C	3	399610	2021-02-03	DF	19.5	2021-05-19	44	15				C3		0	0	0
15	C	4	399611	2021-02-03	1	20.1	2021-05-19	44	15				C4		0	0	0
16	D	0	399612	2021-02-03	21	18.6	2021-05-19	44	15				D0		0	0
17	D	1	399613	2021-02-03	5	20.4	2021-05-19	44	15		0	0	D1		0	0
18	D	2	399614	2021-02-03	1	18.8	2021-05-19	44	15				D2		0	0
19	D	3	399615	2021-02-03	5	21.1	2021-05-19	44	15		11.1	10.8	D3		647.352	647.352
20	D	4	399616	2021-02-03	1	18.8	2021-05-19	44	15		10.3	10.5	D4		567.788	567.788
21	E	0	399617	2021-02-03	21	19.6	2021-05-19	44	15				E0		0	0	0
22	E	1	399618	2021-02-03	21	20.3	2021-05-19	44	15				E1		0	0
23	E	2	399619	2021-02-03	21	18.4	2021-05-19	44	15				E2		0	0
24	E	3	399620	2021-02-03	5	21.1	2021-05-19	44	15				E3		0	0
25	E	4	399621	2021-02-03	FIH	18	2021-05-19	44	15				E4		0	0
26	F	0	399622	2021-02-03	NoT	18.7	2021-05-19	44	15				F0		0	0	0
27	F	1	399623	2021-02-03	FG	19.3	2021-05-19	44	15				F1		0	0
28	F	2	399624	2021-02-03	1	19.4	2021-05-19	44	15				F2		0	0					IP?
29	F	3	399625	2021-02-03	1	20.5	2021-05-19	44	15				F3		0	0	0
30	F	4	399626	2021-02-03	NoT	21.4	2021-05-19	44	15				F4		0	0
31							2021-05-19	44
32	G	1	399628	2021-02-03	5	21.2	2021-05-19	44	15				G1		0	0
33	G	2	399629	2021-02-03	5	18.5	2021-05-19	44	15				G2		0	0
34	G	3	399630	2021-02-03	VHL	21	2021-05-19	44	15				G3		0	0
35	G	4	399631	2021-02-03	FG	19.1	2021-05-19	44	15		0	0	G4		0	0
36	H	0	399632	2021-02-03	1	19.7	2021-05-19	44	15				H0		0	ip	0
37	H	1	399633	2021-02-03	NoT	20.8	2021-05-19	44	15				H1		0	0	0
38	H	2	399634	2021-02-03	FG	19	2021-05-19	44	15				H2		0	0
39	H	3	399635	2021-02-03	VHL	20.4	2021-05-19	44	15				H3		0	0
40	H	4	399636	2021-02-03	DF	19	2021-05-19	44	15				H4		0	0
41	I	0	399637	2021-02-03	NoT	20.4	2021-05-19	44	15				I0		0	0	0
42	I	1	399638	2021-02-03	FIH	19.8	2021-05-19	44	15		0	0	I1		0	0
43	I	2	399639	2021-02-03	FIH	19.6	2021-05-19	44	15				I2		0	0
44	I	3	399640	2021-02-03	1	19.4	2021-05-19	44	15		12.1	9.1	I3		501	501
45	I	4	399641	2021-02-03	21	18.7	2021-05-19	44	15				I4		0	0
46	J	0	399642	2021-02-03	VHL	19.1	2021-05-19	44	15				J0		0	0
47	J	1	399643	2021-02-03	1	20.5	2021-05-19	44	15				J1		0	0	0
48	J	2	399644	2021-02-03	VHL	20.9	2021-05-19	44	15				J2		0	0
49	J	3	399645	2021-02-03	FG	21.1	2021-05-19	44	15		0	0	J3		0	0	0
50	J	4	399646	2021-02-03	5	20.9	2021-05-19	44	15				J4		0	0
51	K	0	399647	2021-02-03	DF	19.2	2021-05-19	44	15		8.7	5.7	K0		141.332	141.332
52	K	1	399648	2021-02-03	DF	20.9	2021-05-19	44	15				K1		0	0
53	K	2	399649	2021-02-03	21	19.9	2021-05-19	44	15		0	0	K2		0	0
54	K	3	399650	2021-02-03	FIH?	20.7	2021-05-19	44	15				K3		0	0	0
55	K	4	399651	2021-02-03	VHL?	17.3	2021-05-19	44	15		0	0	K4		0	0
56	L	0	399652	2021-02-03	DF	19.9	2021-05-19	44	15				L0		0	0
57	L	1	399653	2021-02-03	FG	21.4	2021-05-19	44	15				L1		0	0
58	L	2	399654	2021-02-03	DF	20.1	2021-05-19	44	15				L2		0	0
59	L	3	399655	2021-02-03	DF	19.1	2021-05-19	44	15				L3		0	0	0
60	L	4	399656	2021-02-03	FG	19.8	2021-05-19	44	15				L4		0	0
61	M	0	399657	2021-02-03	VHL	18.6	2021-05-19	44	15				M0		0	0	0
62	M	1	399658	2021-02-03	21	16.8	2021-05-19	44	15				M1		0	0
63	M	2	399659	2021-02-03	21	19.8	2021-05-19	44	15		0	0	M2		0	0
64	M	3	399660	2021-02-03	VHL	21.5	2021-05-19	44	15				M3		0	0	0
65	M	4	399661	2021-02-03	VHL	18.3	2021-05-19	44	15				M4		0	0
66	N	0	399662	2021-02-03	NOT	19.5	2021-05-19	44	15				N0		0	0
67	N	1	399663	2021-02-03	FIH	20.9	2021-05-19	44	15				N1		0	0	0
68	N	2	399664	2021-02-03	VHL	19.6	2021-05-19	44	15				N2		0	0
69	N	3	399665	2021-02-03	5	18.7	2021-05-19	44	15				N3		0	0	0
70	N	4	399666	2021-02-03	VHL	19.1	2021-05-19	44	15				N4		0	0
71	O	0	399667	2021-02-03	FG	17.5	2021-05-19	44	15				O0		0	0
72	O	1	399668	2021-02-03	NOT	21	2021-05-19	44	15				O1		0	0
73	O	2	399669	2021-02-03	FIH	19	2021-05-19	44	15				O2		0	0
74	O	3	399670	2021-02-03	FIH	17	2021-05-19	44	15				O3		0	0
75	O	4	399671	2021-02-03	1	20.3	2021-05-19	44	15				O4		0	0	0
76							2021-05-19	44
77	P	2	399673	2021-02-03	5	19.5	2021-05-19	44	15				P1		0	0
78	P	3	399674	2021-02-03	5	18.7	2021-05-19	44	15				P2		0	0
79	P	4	399675	2021-02-03	FIH	19.6	2021-05-19	44	15				P3		0	0
80	P	5	399676	2021-02-03	1	19.8	2021-05-19	44	15		0	0	P4		0	0
								-44291
1	A	0	399597	2021-02-03	NoT	18.5	2021-05-21	46	15.2857				A0		0	0
2	A	1	399598	2021-02-03	21	19.9	2021-05-21	46	15.2857				A1		0	0	0
3	A	2	399599	2021-02-03	DF	20.8	2021-05-21	46	15.2857				A2		0	0
4	A	3	399600	2021-02-03	FG	19	2021-05-21	46	15.2857				A3		0	0
5	A	4	399601	2021-02-03	21	18.5	2021-05-21	46	15.2857				A4		0	0
6							2021-05-21	46
7	B	1	399603	2021-02-03	FIH	18.7	2021-05-21	46	15.2857				B1		0	0
6							2021-05-21	46
9	B	3	399605	2021-02-03	FG	21.2	2021-05-21	46	15.2857				B3		0	0
10	B	4	399606	2021-02-03	FIH	21.2	2021-05-21	46	15.2857		0	0	B4		0	0
11	C	0	399607	2021-02-03	DF	19.4	2021-05-21	46	15.2857		9.1	8	C0		291.2	291.2	0
12	C	1	399608	2021-02-03	DF	19.8	2021-05-21	46	15.2857				C1		0	0	0
13	C	2	399609	2021-02-03	FG	19.8	2021-05-21	46	15.2857				C2		0	0
14	C	3	399610	2021-02-03	DF	19.5	2021-05-21	46	15.2857				C3		0	0	0
15	C	4	399611	2021-02-03	1	20.1	2021-05-21	46	15.2857				C4		0	0	0
16	D	0	399612	2021-02-03	21	18.6	2021-05-21	46	15.2857				D0		0	0
17	D	1	399613	2021-02-03	5	20.4	2021-05-21	46	15.2857		0	0	D1		0	0
18	D	2	399614	2021-02-03	1	18.8	2021-05-21	46	15.2857				D2		0	0
19	D	3	399615	2021-02-03	5	21.1	2021-05-21	46	15.2857				D3		0	0
20	D	4	399616	2021-02-03	1	18.8	2021-05-21	46	15.2857				D4		0	0
21	E	0	399617	2021-02-03	21	19.6	2021-05-21	46	15.2857				E0		0	0	0
22	E	1	399618	2021-02-03	21	20.3	2021-05-21	46	15.2857				E1		0	0
23	E	2	399619	2021-02-03	21	18.4	2021-05-21	46	15.2857				E2		0	0
24	E	3	399620	2021-02-03	5	21.1	2021-05-21	46	15.2857				E3		0	0
25	E	4	399621	2021-02-03	FIH	18	2021-05-21	46	15.2857				E4		0	0
26	F	0	399622	2021-02-03	NoT	18.7	2021-05-21	46	15.2857				F0		0	0	0
27	F	1	399623	2021-02-03	FG	19.3	2021-05-21	46	15.2857				F1		0	0
28	F	2	399624	2021-02-03	1	19.4	2021-05-21	46	15.2857				F2		0	0					IP?
29	F	3	399625	2021-02-03	1	20.5	2021-05-21	46	15.2857				F3		0	0	0
30	F	4	399626	2021-02-03	NoT	21.4	2021-05-21	46	15.2857				F4		0	0
31							2021-05-21	46
32	G	1	399628	2021-02-03	5	21.2	2021-05-21	46	15.2857				G1		0	0
33	G	2	399629	2021-02-03	5	18.5	2021-05-21	46	15.2857				G2		0	0
34	G	3	399630	2021-02-03	VHL	21	2021-05-21	46	15.2857				G3		0	0
35	G	4	399631	2021-02-03	FG	19.1	2021-05-21	46	15.2857		0	0	G4		0	0
36	H	0	399632	2021-02-03	1	19.7	2021-05-21	46	15.2857				H0		0	ip	0
37	H	1	399633	2021-02-03	NoT	20.8	2021-05-21	46	15.2857				H1		0	0	0
38	H	2	399634	2021-02-03	FG	19	2021-05-21	46	15.2857				H2		0	0
39	H	3	399635	2021-02-03	VHL	20.4	2021-05-21	46	15.2857				H3		0	0
40	H	4	399636	2021-02-03	DF	19	2021-05-21	46	15.2857				H4		0	0
41	I	0	399637	2021-02-03	NoT	20.4	2021-05-21	46	15.2857				I0		0	0	0
42	I	1	399638	2021-02-03	FIH	19.8	2021-05-21	46	15.2857		0	0	I1		0	0
43	I	2	399639	2021-02-03	FIH	19.6	2021-05-21	46	15.2857				I2		0	0
44	I	3	399640	2021-02-03	1	19.4	2021-05-21	46	15.2857		13.3	10.4	I3		719.264	719.264
45	I	4	399641	2021-02-03	21	18.7	2021-05-21	46	15.2857				I4		0	0
46	J	0	399642	2021-02-03	VHL	19.1	2021-05-21	46	15.2857				J0		0	0
47	J	1	399643	2021-02-03	1	20.5	2021-05-21	46	15.2857				J1		0	0	0
48	J	2	399644	2021-02-03	VHL	20.9	2021-05-21	46	15.2857				J2		0	0
49	J	3	399645	2021-02-03	FG	21.1	2021-05-21	46	15.2857		4	3.5	J3		24.5	24.5	0
50	J	4	399646	2021-02-03	5	20.9	2021-05-21	46	15.2857				J4		0	0
51	K	0	399647	2021-02-03	DF	19.2	2021-05-21	46	15.2857		5.7	4.6	K0		60.306	60.306
52	K	1	399648	2021-02-03	DF	20.9	2021-05-21	46	15.2857				K1		0	0
53	K	2	399649	2021-02-03	21	19.9	2021-05-21	46	15.2857		0	0	K2		0	0
54	K	3	399650	2021-02-03	FIH?	20.7	2021-05-21	46	15.2857				K3		0	0	0
55	K	4	399651	2021-02-03	VHL?	17.3	2021-05-21	46	15.2857		6.5	4.2	K4		57.33	57.33
56	L	0	399652	2021-02-03	DF	19.9	2021-05-21	46	15.2857				L0		0	0
57	L	1	399653	2021-02-03	FG	21.4	2021-05-21	46	15.2857				L1		0	0
58	L	2	399654	2021-02-03	DF	20.1	2021-05-21	46	15.2857				L2		0	0
59	L	3	399655	2021-02-03	DF	19.1	2021-05-21	46	15.2857				L3		0	0	0
60	L	4	399656	2021-02-03	FG	19.8	2021-05-21	46	15.2857				L4		0	0
61	M	0	399657	2021-02-03	VHL	18.6	2021-05-21	46	15.2857				M0		0	0	0
62	M	1	399658	2021-02-03	21	16.8	2021-05-21	46	15.2857				M1		0	0
63	M	2	399659	2021-02-03	21	19.8	2021-05-21	46	15.2857		0	0	M2		0	0
64	M	3	399660	2021-02-03	VHL	21.5	2021-05-21	46	15.2857				M3		0	0	0
65	M	4	399661	2021-02-03	VHL	18.3	2021-05-21	46	15.2857				M4		0	0
66	N	0	399662	2021-02-03	NOT	19.5	2021-05-21	46	15.2857				N0		0	0
67	N	1	399663	2021-02-03	FIH	20.9	2021-05-21	46	15.2857				N1		0	0	0
68	N	2	399664	2021-02-03	VHL	19.6	2021-05-21	46	15.2857				N2		0	0
69	N	3	399665	2021-02-03	5	18.7	2021-05-21	46	15.2857				N3		0	0	0
70	N	4	399666	2021-02-03	VHL	19.1	2021-05-21	46	15.2857				N4		0	0
71	O	0	399667	2021-02-03	FG	17.5	2021-05-21	46	15.2857				O0		0	0
72	O	1	399668	2021-02-03	NOT	21	2021-05-21	46	15.2857				O1		0	0
73	O	2	399669	2021-02-03	FIH	19	2021-05-21	46	15.2857				O2		0	0
74	O	3	399670	2021-02-03	FIH	17	2021-05-21	46	15.2857				O3		0	0
75	O	4	399671	2021-02-03	1	20.3	2021-05-21	46	15.2857				O4		0	0	0
76							2021-05-21	46
77	P	2	399673	2021-02-03	5	19.5	2021-05-21	46	15.2857				P1		0	0
78	P	3	399674	2021-02-03	5	18.7	2021-05-21	46	15.2857				P2		0	0
79	P	4	399675	2021-02-03	FIH	19.6	2021-05-21	46	15.2857				P3		0	0
80	P	5	399676	2021-02-03	1	19.8	2021-05-21	46	15.2857		0	0	P4		0	0
								-44291
1	A	0	399597	2021-02-03	NoT	18.5	2021-05-24	49	15.7143				A0		0	0
2	A	1	399598	2021-02-03	21	19.9	2021-05-24	49	15.7143				A1		0	0	0
3	A	2	399599	2021-02-03	DF	20.8	2021-05-24	49	15.7143				A2		0	0
4	A	3	399600	2021-02-03	FG	19	2021-05-24	49	15.7143				A3		0	0
5	A	4	399601	2021-02-03	21	18.5	2021-05-24	49	15.7143				A4		0	0
6							2021-05-24	49
7	B	1	399603	2021-02-03	FIH	18.7	2021-05-24	49	15.7143				B1		0	0
6							2021-05-24	49
9	B	3	399605	2021-02-03	FG	21.2	2021-05-24	49	15.7143				B3		0	0
10	B	4	399606	2021-02-03	FIH	21.2	2021-05-24	49	15.7143		0	0	B4		0	0
11	C	0	399607	2021-02-03	DF	19.4	2021-05-24	49	15.7143		11	10.2	C0		572.22	572.22	0
12	C	1	399608	2021-02-03	DF	19.8	2021-05-24	49	15.7143				C1		0	0	0
13	C	2	399609	2021-02-03	FG	19.8	2021-05-24	49	15.7143				C2		0	0
14	C	3	399610	2021-02-03	DF	19.5	2021-05-24	49	15.7143				C3		0	0	0
15	C	4	399611	2021-02-03	1	20.1	2021-05-24	49	15.7143				C4		0	0	0
16	D	0	399612	2021-02-03	21	18.6	2021-05-24	49	15.7143				D0		0	0
17	D	1	399613	2021-02-03	5	20.4	2021-05-24	49	15.7143		0	0	D1		0	0
18	D	2	399614	2021-02-03	1	18.8	2021-05-24	49	15.7143				D2		0	0
19	D	3	399615	2021-02-03	5	21.1	2021-05-24	49	15.7143				D3		0	0
20	D	4	399616	2021-02-03	1	18.8	2021-05-24	49	15.7143				D4		0	0
21	E	0	399617	2021-02-03	21	19.6	2021-05-24	49	15.7143				E0		0	0	0
22	E	1	399618	2021-02-03	21	20.3	2021-05-24	49	15.7143				E1		0	0
23	E	2	399619	2021-02-03	21	18.4	2021-05-24	49	15.7143				E2		0	0
24	E	3	399620	2021-02-03	5	21.1	2021-05-24	49	15.7143				E3		0	0
25	E	4	399621	2021-02-03	FIH	18	2021-05-24	49	15.7143				E4		0	0
26	F	0	399622	2021-02-03	NoT	18.7	2021-05-24	49	15.7143				F0		0	0	0
27	F	1	399623	2021-02-03	FG	19.3	2021-05-24	49	15.7143				F1		0	0
28	F	2	399624	2021-02-03	1	19.4	2021-05-24	49	15.7143				F2		0	0					IP?
29	F	3	399625	2021-02-03	1	20.5	2021-05-24	49	15.7143				F3		0	0	0
30	F	4	399626	2021-02-03	NoT	21.4	2021-05-24	49	15.7143				F4		0	0
31							2021-05-24	49
32	G	1	399628	2021-02-03	5	21.2	2021-05-24	49	15.7143				G1		0	0
33	G	2	399629	2021-02-03	5	18.5	2021-05-24	49	15.7143				G2		0	0
34	G	3	399630	2021-02-03	VHL	21	2021-05-24	49	15.7143				G3		0	0
35	G	4	399631	2021-02-03	FG	19.1	2021-05-24	49	15.7143		0	0	G4		0	0
36	H	0	399632	2021-02-03	1	19.7	2021-05-24	49	15.7143				H0		0	ip	0
37	H	1	399633	2021-02-03	NoT	20.8	2021-05-24	49	15.7143				H1		0	0	0
38	H	2	399634	2021-02-03	FG	19	2021-05-24	49	15.7143				H2		0	0
39	H	3	399635	2021-02-03	VHL	20.4	2021-05-24	49	15.7143				H3		0	0
40	H	4	399636	2021-02-03	DF	19	2021-05-24	49	15.7143				H4		0	0
41	I	0	399637	2021-02-03	NoT	20.4	2021-05-24	49	15.7143				I0		0	0	0
42	I	1	399638	2021-02-03	FIH	19.8	2021-05-24	49	15.7143		0	0	I1		0	0
43	I	2	399639	2021-02-03	FIH	19.6	2021-05-24	49	15.7143				I2		0	0
44	I	3	399640	2021-02-03	1	19.4	2021-05-24	49	15.7143				I3		0	0
45	I	4	399641	2021-02-03	21	18.7	2021-05-24	49	15.7143				I4		0	0
46	J	0	399642	2021-02-03	VHL	19.1	2021-05-24	49	15.7143				J0		0	0
47	J	1	399643	2021-02-03	1	20.5	2021-05-24	49	15.7143				J1		0	0	0
48	J	2	399644	2021-02-03	VHL	20.9	2021-05-24	49	15.7143				J2		0	0
49	J	3	399645	2021-02-03	FG	21.1	2021-05-24	49	15.7143		0	0	J3		0	0	0
50	J	4	399646	2021-02-03	5	20.9	2021-05-24	49	15.7143				J4		0	0
51	K	0	399647	2021-02-03	DF	19.2	2021-05-24	49	15.7143		5.1	3.8	K0		36.822	36.822
52	K	1	399648	2021-02-03	DF	20.9	2021-05-24	49	15.7143				K1		0	0
53	K	2	399649	2021-02-03	21	19.9	2021-05-24	49	15.7143		0	0	K2		0	0
54	K	3	399650	2021-02-03	FIH?	20.7	2021-05-24	49	15.7143				K3		0	0	0
55	K	4	399651	2021-02-03	VHL?	17.3	2021-05-24	49	15.7143				K4		0	0
56	L	0	399652	2021-02-03	DF	19.9	2021-05-24	49	15.7143				L0		0	0
57	L	1	399653	2021-02-03	FG	21.4	2021-05-24	49	15.7143				L1		0	0
58	L	2	399654	2021-02-03	DF	20.1	2021-05-24	49	15.7143				L2		0	0
59	L	3	399655	2021-02-03	DF	19.1	2021-05-24	49	15.7143				L3		0	0	0
60	L	4	399656	2021-02-03	FG	19.8	2021-05-24	49	15.7143				L4		0	0
61	M	0	399657	2021-02-03	VHL	18.6	2021-05-24	49	15.7143				M0		0	0	0
62	M	1	399658	2021-02-03	21	16.8	2021-05-24	49	15.7143				M1		0	0
63	M	2	399659	2021-02-03	21	19.8	2021-05-24	49	15.7143		0	0	M2		0	0
64	M	3	399660	2021-02-03	VHL	21.5	2021-05-24	49	15.7143				M3		0	0	0
65	M	4	399661	2021-02-03	VHL	18.3	2021-05-24	49	15.7143				M4		0	0
66	N	0	399662	2021-02-03	NOT	19.5	2021-05-24	49	15.7143				N0		0	0
67	N	1	399663	2021-02-03	FIH	20.9	2021-05-24	49	15.7143				N1		0	0	0
68	N	2	399664	2021-02-03	VHL	19.6	2021-05-24	49	15.7143				N2		0	0
69	N	3	399665	2021-02-03	5	18.7	2021-05-24	49	15.7143				N3		0	0	0
70	N	4	399666	2021-02-03	VHL	19.1	2021-05-24	49	15.7143				N4		0	0
71	O	0	399667	2021-02-03	FG	17.5	2021-05-24	49	15.7143				O0		0	0
72	O	1	399668	2021-02-03	NOT	21	2021-05-24	49	15.7143				O1		0	0
73	O	2	399669	2021-02-03	FIH	19	2021-05-24	49	15.7143				O2		0	0
74	O	3	399670	2021-02-03	FIH	17	2021-05-24	49	15.7143				O3		0	0
75	O	4	399671	2021-02-03	1	20.3	2021-05-24	49	15.7143				O4		0	0	0
76							2021-05-24	49
77	P	2	399673	2021-02-03	5	19.5	2021-05-24	49	15.7143				P1		0	0
78	P	3	399674	2021-02-03	5	18.7	2021-05-24	49	15.7143				P2		0	0
79	P	4	399675	2021-02-03	FIH	19.6	2021-05-24	49	15.7143				P3		0	0
80	P	5	399676	2021-02-03	1	19.8	2021-05-24	49	15.7143		0	0	P4		0	0
								-44291
1	A	0	399597	2021-02-03	NoT	18.5	2021-05-26	51	16				A0		0	0
2	A	1	399598	2021-02-03	21	19.9	2021-05-26	51	16				A1		0	0	0
3	A	2	399599	2021-02-03	DF	20.8	2021-05-26	51	16				A2		0	0
4	A	3	399600	2021-02-03	FG	19	2021-05-26	51	16				A3		0	0
5	A	4	399601	2021-02-03	21	18.5	2021-05-26	51	16				A4		0	0
6							2021-05-26	51
7	B	1	399603	2021-02-03	FIH	18.7	2021-05-26	51	16				B1		0	0
6							2021-05-26	51
9	B	3	399605	2021-02-03	FG	21.2	2021-05-26	51	16				B3		0	0
10	B	4	399606	2021-02-03	FIH	21.2	2021-05-26	51	16		0	0	B4		0	0
11	C	0	399607	2021-02-03	DF	19.4	2021-05-26	51	16				C0		0	0	0
12	C	1	399608	2021-02-03	DF	19.8	2021-05-26	51	16				C1		0	0	0
13	C	2	399609	2021-02-03	FG	19.8	2021-05-26	51	16				C2		0	0
14	C	3	399610	2021-02-03	DF	19.5	2021-05-26	51	16				C3		0	0	0
15	C	4	399611	2021-02-03	1	20.1	2021-05-26	51	16				C4		0	0	0
16	D	0	399612	2021-02-03	21	18.6	2021-05-26	51	16				D0		0	0
17	D	1	399613	2021-02-03	5	20.4	2021-05-26	51	16		0	0	D1		0	0
18	D	2	399614	2021-02-03	1	18.8	2021-05-26	51	16				D2		0	0
19	D	3	399615	2021-02-03	5	21.1	2021-05-26	51	16				D3		0	0
20	D	4	399616	2021-02-03	1	18.8	2021-05-26	51	16				D4		0	0
21	E	0	399617	2021-02-03	21	19.6	2021-05-26	51	16				E0		0	0	0
22	E	1	399618	2021-02-03	21	20.3	2021-05-26	51	16				E1		0	0
23	E	2	399619	2021-02-03	21	18.4	2021-05-26	51	16				E2		0	0
24	E	3	399620	2021-02-03	5	21.1	2021-05-26	51	16				E3		0	0
25	E	4	399621	2021-02-03	FIH	18	2021-05-26	51	16				E4		0	0
26	F	0	399622	2021-02-03	NoT	18.7	2021-05-26	51	16				F0		0	0	0
27	F	1	399623	2021-02-03	FG	19.3	2021-05-26	51	16				F1		0	0
28	F	2	399624	2021-02-03	1	19.4	2021-05-26	51	16				F2		0	0					IP?
29	F	3	399625	2021-02-03	1	20.5	2021-05-26	51	16				F3		0	0	0
30	F	4	399626	2021-02-03	NoT	21.4	2021-05-26	51	16				F4		0	0
31							2021-05-26	51
32	G	1	399628	2021-02-03	5	21.2	2021-05-26	51	16				G1		0	0
33	G	2	399629	2021-02-03	5	18.5	2021-05-26	51	16				G2		0	0
34	G	3	399630	2021-02-03	VHL	21	2021-05-26	51	16				G3		0	0
35	G	4	399631	2021-02-03	FG	19.1	2021-05-26	51	16		0	0	G4		0	0
36	H	0	399632	2021-02-03	1	19.7	2021-05-26	51	16				H0		0	ip	0
37	H	1	399633	2021-02-03	NoT	20.8	2021-05-26	51	16				H1		0	0	0
38	H	2	399634	2021-02-03	FG	19	2021-05-26	51	16				H2		0	0
39	H	3	399635	2021-02-03	VHL	20.4	2021-05-26	51	16				H3		0	0
40	H	4	399636	2021-02-03	DF	19	2021-05-26	51	16				H4		0	0
41	I	0	399637	2021-02-03	NoT	20.4	2021-05-26	51	16				I0		0	0	0
42	I	1	399638	2021-02-03	FIH	19.8	2021-05-26	51	16		0	0	I1		0	0
43	I	2	399639	2021-02-03	FIH	19.6	2021-05-26	51	16				I2		0	0
44	I	3	399640	2021-02-03	1	19.4	2021-05-26	51	16				I3		0	0
45	I	4	399641	2021-02-03	21	18.7	2021-05-26	51	16				I4		0	0
46	J	0	399642	2021-02-03	VHL	19.1	2021-05-26	51	16				J0		0	0
47	J	1	399643	2021-02-03	1	20.5	2021-05-26	51	16				J1		0	0	0
48	J	2	399644	2021-02-03	VHL	20.9	2021-05-26	51	16				J2		0	0
49	J	3	399645	2021-02-03	FG	21.1	2021-05-26	51	16		0	0	J3		0	0	0
50	J	4	399646	2021-02-03	5	20.9	2021-05-26	51	16				J4		0	0
51	K	0	399647	2021-02-03	DF	19.2	2021-05-26	51	16		13.7	9.3	K0		592.457	592.457
52	K	1	399648	2021-02-03	DF	20.9	2021-05-26	51	16				K1		0	0
53	K	2	399649	2021-02-03	21	19.9	2021-05-26	51	16		0	0	K2		0	0
54	K	3	399650	2021-02-03	FIH?	20.7	2021-05-26	51	16				K3		0	0	0
55	K	4	399651	2021-02-03	VHL?	17.3	2021-05-26	51	16				K4		0	0
56	L	0	399652	2021-02-03	DF	19.9	2021-05-26	51	16				L0		0	0
57	L	1	399653	2021-02-03	FG	21.4	2021-05-26	51	16				L1		0	0
58	L	2	399654	2021-02-03	DF	20.1	2021-05-26	51	16				L2		0	0
59	L	3	399655	2021-02-03	DF	19.1	2021-05-26	51	16				L3		0	0	0
60	L	4	399656	2021-02-03	FG	19.8	2021-05-26	51	16				L4		0	0
61	M	0	399657	2021-02-03	VHL	18.6	2021-05-26	51	16				M0		0	0	0
62	M	1	399658	2021-02-03	21	16.8	2021-05-26	51	16				M1		0	0
63	M	2	399659	2021-02-03	21	19.8	2021-05-26	51	16		0	0	M2		0	0
64	M	3	399660	2021-02-03	VHL	21.5	2021-05-26	51	16				M3		0	0	0
65	M	4	399661	2021-02-03	VHL	18.3	2021-05-26	51	16				M4		0	0
66	N	0	399662	2021-02-03	NOT	19.5	2021-05-26	51	16				N0		0	0
67	N	1	399663	2021-02-03	FIH	20.9	2021-05-26	51	16				N1		0	0	0
68	N	2	399664	2021-02-03	VHL	19.6	2021-05-26	51	16				N2		0	0
69	N	3	399665	2021-02-03	5	18.7	2021-05-26	51	16				N3		0	0	0
70	N	4	399666	2021-02-03	VHL	19.1	2021-05-26	51	16				N4		0	0
71	O	0	399667	2021-02-03	FG	17.5	2021-05-26	51	16				O0		0	0
72	O	1	399668	2021-02-03	NOT	21	2021-05-26	51	16				O1		0	0
73	O	2	399669	2021-02-03	FIH	19	2021-05-26	51	16				O2		0	0
74	O	3	399670	2021-02-03	FIH	17	2021-05-26	51	16				O3		0	0
75	O	4	399671	2021-02-03	1	20.3	2021-05-26	51	16				O4		0	0	0
76							2021-05-26	51
77	P	2	399673	2021-02-03	5	19.5	2021-05-26	51	16				P1		0	0
78	P	3	399674	2021-02-03	5	18.7	2021-05-26	51	16				P2		0	0
79	P	4	399675	2021-02-03	FIH	19.6	2021-05-26	51	16				P3		0	0
80	P	5	399676	2021-02-03	1	19.8	2021-05-26	51	16		0	0	P4		0	0

## Sheet: Fig 2F
	Tumour burden day 30							outlier removal
		1%O2	5%O2	21%O2	21%O2 + FG	No T cells			1%O2	5%O2	21%O2	21%O2 + FG	No T cells
	pc050b day23 after ACT	31.53396*		0.996638	0.1	23.0644		Method
		3.01048	0.1	60.09619*				ROUT (Q = 1%)
		0.1	1.68436			84.4883
				39.3504				Number of points
		5.12716	1.70417	19.9047	0.1			# Y values analyzed	15	13	16	11	9
			4.43402	17.9406	2.14167	5.79717		Outliers	4	1	2	0	0
		2.07592	4.81576	100.1*		37.5969
		2.42389			9.64285	19.8917			1%O2	5%O2	21%O2	21%O2 + FG	No T cells
		22.2814*	2.15883	8.32924	4.23072	42.7107			31.534
		0.1		0.1	5.34956				22.2814
									39.6835
	pc050a day23 after ACT	39.68351*	4.79006	11.3568	0.1	10.6886			21.9973
		21.99729*	15.3858		12.1					25.756
		6.28409	0.1		10.7535						60.0962
		4.06996	11.1664	2.73387	0.1	33.0603					100.1
		2.30481	4.90816			18.9673
				13.8165	1.48942			statistical analysis
			7.03551	14.7188				Shapiro-Wilk test	1%O2	5%O2	21%O2	21%O2 + FG	No T cells
				8.30878				W	0.9471	0.8676	0.8634	0.8287	0.8592
		7.37218	25.75598*	11.5805				P value	0.6345	0.0609	0.0339	0.0225	0.0939
				13.6806				Passed normality test (alpha=0.05)?	Yes	Yes	No	No	Yes
								P value summary	ns	ns	*	*	ns
				11.5805
								Dunn's multiple comparisons test	Mean rank diff.	Significant?	Summary	Adjusted P Value
								21%O2 vs. 1%O2	17.1	Yes	*	0.0447
								21%O2 vs. 5%O2	14	No	ns	0.1151
								21%O2 vs. 21%O2 + FG	16.91	Yes	*	0.0397
								21%O2 vs. No T cells	-11.67	No	ns	0.3736

## Sheet: Fig 2G
PC050a
T-cells	0	4	7	10	12	14	17	19	21	23	25	27	30	32	35	37	39	41	44	46	49	51	57	60
1	0	5.625	10.406	13.536	20.384	13.536	5.994	3.968	8.2	17.8605	44.7125	153.09	411.906	550.51
1	0	13.0095	28.314	21.866	27.744	15.979	11.132	11.638	17.576	28.175	78.416	154.905	620													day tumour went over 500mm3
1	0	17.8605	31.95	73.206	35.7425	36.4205	23.4375	20.736	30.2715	24.064	43.218	101.338	197.582	442.786	749.7													1	5	21	FG	NoT
1	0	24.674	45.056	65.314	85.196	55.585	34.0625	22.308	26.702	38.5875	53.9955	85.9365	178.87	256.671	511.875											PC050a		31	34	29	51	30
1	0	13.851	37.584	30.492	31.581	16.464	13.754	11.52	6.0835	0	17.9	21.2355	82.8655	159.744	764.2													29	29	37	28	24
1	0	32.256	41.382	47.304	40.425	35.328	19.6875	18.2505	22.5	34.344	47.151	67.8375	300.938	581.042														32	45	27	29	27
5	0	18.252	39.701	13.552	27.9	21.5055	25.2	12.506	21.866	9.922	25.6	46.225	186.2	276.538	555.038													34		33	42
5	0	15.309	37.24	69.312	63.536	40.5	18.634	12.2385	14.8955	27.225	85	152.46	569.244															33	33	25	36
5	0	23.552	44	25.04	19.858	9.792	8.954	13.8	0	8.1995	16.758	5.4	0	20.6045	64.856	127.057	113.438	210.944	386.942	567.088								31	32	33
5	0	13.552	37.975	31.958	19.008	30.235	13.552	11.552	13.4895	19.8	33.075	86.151	182.59	295.312	627.361														28	30
5	0	27.136	30.625	49.9685	22.736	33.759	22.218	16.94	17.8125	41.9265	48.1425	81	212.4	368.562	740
5	0	16.128	25.725	26.55	32.49	30.0125	48.749	87.6365	163.84	163.35	295.856	398.664	660													PC050b		29	60	38	42	22
21	0	23.967	51.712	30.276	67.7655	32.786	17.8605	28.941	33.1425	67.968	85.6745	21.4405	582.112															33	43	30	37
21	0	41.876	38.988	47.3715	30.968	33.635	19.1295	18.935	27.7695	15.886	26.01	50.336	102.69	159.528	274.36	344.45	644.962											43	30	30	32	19
21	0	22.2865	48.008	36.5895	49.011	58.1875	48.2895	77.4025	90.992	110.097	215.784	397.05	658.503																38	31	32	19
21	0	6.3175	18.542	32.9225	46.2915	28.942	40.3855	38.5875	40.3065	63.36	64.538	123.872	271.062	354.294	586.154													32	32	29	51
21	0	35.937	73.933	91.813	98.855	93.1505	168.478	148.96	223.232	338.1	381.024	606.9																	34	29	37	34
21	0	8.586	12.844	34.992	87.8275	28.73	22.218	7.424	0	18.592	18.7395	56.7	147.456	280.845	903.168													44		29	51	21
21	0	30.72	34.9015	20.0475	48.552	44.032	46.128	58.867	92.778	90.584	203.456	210.392	473.984	624.24														34	33		27	21
FG	0	4.394	11.178	5.07	7.6585	3.024	6.528	8.586	12.427	0	3.751	0	0	7.425	6.647	26.4275	46.208	61.056	77.184	80.631	104.104	389.992	1475.91					32	36	28	33	19
FG	0	19.656	54.15	78.498	47.775	39.204	18.75	16.317	28.1735	63.396	98.784	151.632	649.8															60		60	38
FG	0	18.72	54.15	26.364	33.178	18.392	0	0	44.1	61.952	102.043	234.484	576.888
FG	0	8.586	17.5	16.562	23.52	7.0805	8.586	11.132	9.702	0	0	0	0	0	9.5665	51.304	140.306	352.87	753.914							data for survival curve								Statistical anlaysis of survival curves - Mantel-Cox test
FG	0	5.022	16.224	11.132	13.225	9.702	5.12	0.0205	7.942	0	0	0	22.542	51.183	128.454	538.628											day	1	5	21	FG	NoT		21% vs 5%				21% vs 1%				21% vs FG
NoT	0	21.56	36.456	13.872	19.074	28.252	33.516	33.516	27.216	40.3065	128.542	140.899	386.019	871.116												PC050a	31	1						Comparison of Survival Curves				Comparison of Survival Curves				Comparison of Survival Curves
NoT	0	8.712	17.661	26.244	27.5	18.634	38.928	97.211	174.08	357.574	582.112																29	1
NoT	0	36	41.876	56.316	16.5915	41.1235	59.6395	82.134	165.55	320.95	449.16	466.38	790.087														32	1						Log-rank (Mantel-Cox) test				Log-rank (Mantel-Cox) test				Log-rank (Mantel-Cox) test
																											34	1						Chi square	2.322			Chi square	1.968			Chi square	3.887
PC050b																											33	1						df	1			df	1			df	1
T-cells	0	7	9	11	13	14	16	18	20	22	24	26	28	30	33	35	37	39	42	44	46						31	1						P value	0.1276			P value	0.1607			P value	0.0487
1	0	20.776	56.628	81.867	80.8	20.691	7.1415	4.6305	2.7455	7.1415	36.7855	56.277	293.091	653.072													34		1					P value summary	ns			P value summary	ns			P value summary	*
1	0	53.3355	55.566	52.022	33.28	22.9635	10.53	14.8	8.4	17.298	28.749	46.2275	116.272	155.232	379.688	631.774											29		1					Are the survival curves sig different?	No			Are the survival curves sig different?	No			Are the survival curves sig different?	Yes
1	0	24.75	25.6505	34.2	26.656	24.389	0	0	0	0	0	0	0	0	7.8125	21.2355	55.016	102.602	216.562	567.788							45		1
1	0	0	0	0	0	0	0	0	0	0	0	0	0	0	0	0	0	0	0	0	0	excluded - never had tumour					33		1					Gehan-Breslow-Wilcoxon test				Gehan-Breslow-Wilcoxon test				Gehan-Breslow-Wilcoxon test
1	0	24.576	26.136	80.525	59.3	57.156	12.844	21.999	6.912	6.912	0	0	58.968	123.547	612.794												32		1					Chi square	4.216			Chi square	3.975			Chi square	4.612
1	0	9.9225	17.576	0	28.7955	44.506	27.328	40.96	51.262	65.268	99.6415	116.25															28		1					df	1			df	1			df	1
1	0	13.456	23.8875	37.2645	29.403	12.615	19.8	15.309	7.018	7.935	6.912	12.0285	29.602	26.588	57.319	91.936	88.434	172.032	210.983	501	719.264						29			1				P value	0.04			P value	0.0462			P value	0.0318
1	0	38.4	53.8835	82.654	26.588	19.7005	0	21.504	0	0	0	39.2	40.344	89.2375	267.898	559.558											37			1				P value summary	*			P value summary	*			P value summary	*
1	0	15.309	26.25	33.574	31.404	16.8975	11.2455	0	0	0	0	93.312	208.088	339.575	522.199												27			1				Are the survival curves sig different?	Yes			Are the survival curves sig different?	Yes			Are the survival curves sig different?	Yes
1	0	5.994	14.8955	38.808	15.75	0	0	0	0	0	0	0	0	0	0	0	0	0	0	0	0	no tumours found until day 60					33			1
5	0	20.6045	17.5	22.2345	23.1275	43.808	17.576	5.9565	8.788	0	0	0	0	0	0	0	0	0	0	0	0	no tumours found until day 60					25			1				Median survival				Median survival				Median survival
5	0	33.462	34.983	23.698	19.0575	15.8565	5.324	7.6705	8.4375	0	0	19.652	53.6625	53.016	102.602	99.0945	101.92	224.516	246.054	647.352							33			1				5	33.5			1	32.5			21	30
5	0	0	8.7285	9.126	4.6305	0	0	0	0	0	0	0	0	379.688	869.938												30			1				21	30			21	30			FG	37
5	0	32.856	29.4335	31.768	27.166	15.288	10.625	12.1875	13.52	15.3125	16.384	15.138	34.4605	52.7065	152.762	177.531	346.788	599.04									51				1			Ratio (and its reciprocal)	1.117	0.8955		Ratio (and its reciprocal)	1.083	0.9231		Ratio (and its reciprocal)	0.8108	1.233
5	0	73.9125	95.992	141.398	93.288	94.08	32.4625	20.776	14.872	20.992	33.212	68.4285	136.462	320.339	540.653												28				1			95% CI of ratio	0.5313 to 2.347	0.4261 to 1.882		95% CI of ratio	0.5155 to 2.277	0.4392 to 1.940		95% CI of ratio	0.3858 to 1.704	0.5868 to 2.592
5	0	32.7015	25.088	44.982	28.749	68.921	8.064	8.125	0	0	0	95.8455	169.016	154.212	393.576	567.018											29				1
5	0	57.6	50.625	62.5	36.992	19.683	21.6	18.252	0	9.8415	0	38.4	135.76	118.588	359.856	691.488											42				1			Hazard Ratio (Mantel-Haenszel)	B/C	C/B		Hazard Ratio (Mantel-Haenszel)	A/C	C/A		Hazard Ratio (Mantel-Haenszel)	C/D	D/C
5	0	0	0	0	0	0	0	0	0	0	18.45	66.25	73.2305	105.593	221.952	277.725	504.21										36				1			Ratio (and its reciprocal)	0.5316	1.881		Ratio (and its reciprocal)	0.5582	1.792		Ratio (and its reciprocal)	2.318	0.4315
21	0	10.976	23.292	31.8355	29.2945	15.625	5.8	0	0	0	0	0	0	9.8415	58.752	95.648	313.992	583.495									30					1		95% CI of ratio	0.2359 to 1.198	0.8346 to 4.240		95% CI of ratio	0.2471 to 1.261	0.7933 to 4.046		95% CI of ratio	1.005 to 5.344	0.1871 to 0.9951
21	0	6.292	49.284	51.2705	65.268	41.616	0	0	0	19.652	41.6025	173.4	277.725	377.496	817.216												24					1
21	0	0	30.634	0	0	8.228	44.764	0	0	0	0	173.95	202.343	417.874	986.123												27					1		Hazard Ratio (logrank)	B/C	C/B		Hazard Ratio (logrank)	A/C	C/A		Hazard Ratio (logrank)	C/D	D/C
21	0	9.8415	53.6	66.9335	65.236	0	0	0	5.324	13.4865	26.568	68.75	213.704	386.283	584.064																			Ratio (and its reciprocal)	0.5886	1.699		Ratio (and its reciprocal)	0.6153	1.625		Ratio (and its reciprocal)	1.96	0.5102
21	0	32.768	95	75.9375	106.25	50.43	34.848	16.9	51.304	0	50.8475	176.62	319.41	648.96												PC050b	29	1						95% CI of ratio	0.2767 to 1.252	0.7987 to 3.614		95% CI of ratio	0.2901 to 1.305	0.7664 to 3.447		95% CI of ratio	0.9103 to 4.221	0.2369 to 1.098
21	0	32.4625	36.288	55.728	31.744	42.588	35.258	32.674	10.3635	20.181	20.6045	91.008	275.625	579.15													33	1
21	0	5.994	0	0	86.5715	52.65	34.656	34.4	24.5	57.132	124.848	358.4	333.062	599.4													43	1						NoACT vs 21%				NoACT vs 5%				NoACT vs 1%				NoACT vs FG-4592
21	0	0	0	0	0	0	0	23.5445	0	0	0	0	0	0	0	0	0	0	0	0	0	excluded - never had tumour					32	1						Comparison of Survival Curves				Comparison of Survival Curves				Comparison of Survival Curves				Comparison of Survival Curves
21	0	77.2475	114.95	128.797	202.176	169.016	78.416	37.044	26.95	33.462	75.6315	233.928	446.976	635.688													44	1
21	0	13.0355	8.788	14.8955	10.14	7.488	8.1995	8.788	3.4295	0	3.4295	3.4295	2.5875	0	0	0	0	0	0	0	0	no tumours found until day 60					34	1						Log-rank (Mantel-Cox) test				Log-rank (Mantel-Cox) test				Log-rank (Mantel-Cox) test				Log-rank (Mantel-Cox) test
FG	0	25.432	44.109	53.24	38.7855	31.752	15.5585	0	0	0	0	0	16.337	0	17.55	21.504	36.982	86.2125	270.738	900.422							32	1						Chi square	8.4			Chi square	14.57			Chi square	12.72			Chi square	18.76
FG	0	0	83.1875	113.724	44.8695	23.4	0	23.4	0	0	0	0	0	57.6	192.237	238.464	333.894	718.8									60	0						df	1			df	1			df	1			df	1
FG	0	0	0	0	0	0	0	0	0	0	0	63.48	128.797	234.196	578.812												60		0					P value	0.0038			P value	0.0001			P value	0.0004			P value	<0.0001
FG	0	0	115.973	228.69	161.838	138.058	73.0355	47.915	12.506	46.208	38.4	108.9	216.763	210.392	538.996												43		1					P value summary	**			P value summary	***			P value summary	***			P value summary	****
FG	0	18.75	14.872	34.9125	22.2865	19.604	19.6	7.0395	0	0	0	0	0	0	0	0	0	0	7.26	0	0	no tumours found until day 60					30		1					Are the survival curves sig different?	Yes			Are the survival curves sig different?	Yes			Are the survival curves sig different?	Yes			Are the survival curves sig different?	Yes
FG	0	27.216	36.504	66.0275	48.668	20.992	14.504	7.6705	7.986	9.802	18.9	36.2785	53.802	55.566	179.56	298.125	627.356										38		1
FG	0	0	7.8125	24.389	13.2275	5.3465	0	0	0	0	0	0	2.916	0	0	0	0	0	0	0	0	no tumours found until day 60					32		1					Gehan-Breslow-Wilcoxon test				Gehan-Breslow-Wilcoxon test				Gehan-Breslow-Wilcoxon test				Gehan-Breslow-Wilcoxon test
FG	0	58.5385	79.233	157.604	60.7475	40.572	48.6	35.2	49.726	47.628	109.76	278.663	558.624														34		1					Chi square	11.72			Chi square	15.97			Chi square	15.27			Chi square	18.04
FG	0	33.6875	60.0925	68.77	47.9115	57.154	31.2325	9.8	4.6305	0	0	28.314	108.16	139.153	437.112	790.356											33		1					df	1			df	1			df	1			df	1
FG	0	25.872	31.347	31.5	34.596	34.1155	33.28	24.304	26.136	38.988	47.1495	75	102.85	135.816	207.104	231.231	391.988	542.626									36		1					P value	0.0006			P value	<0.0001			P value	<0.0001			P value	<0.0001
NoT	0	27.216	26.95	44	45.486	55.6875	40.8	129.96	145.119	477.144	625	625	625	625	625	625											38			1				P value summary	***			P value summary	****			P value summary	****			P value summary	****
NoT	0	12.1945	19.652	27.436	22.05	77.254	25.92	228.306	554.404																		30			1				Are the survival curves sig different?	Yes			Are the survival curves sig different?	Yes			Are the survival curves sig different?	Yes			Are the survival curves sig different?	Yes
NoT	0	0	0	0	64.856	63.888	109.35	226.845	628.425																		30			1
NoT	0	39.7535	18.9225	23.064	37.8455	29.478	31.104	45.3005	95.506	99.825	112.091	124.2	205.166	226.482	376.248	577.6											31			1				Median survival				Median survival				Median survival				Median survival
NoT	0	15.68	14.6875	18.502	13.72	13.52	29.43	59.6475	152.158	587.951																	29			1				21	30			5	33.5			1	32.5			FG	37
NOT	0	29.184	60.984	135	95.992	100.352	148.838	196.02	329.6	577.6																	29			1				NoT	21.5			NoT	21.5			NoT	21.5			NoT	21.5
NOT	0	13.5	0	0	0	21.4455	80.4335	177.184	541.183																		29			1				Ratio (and its reciprocal)	1.395	0.7167		Ratio (and its reciprocal)	1.558	0.6418		Ratio (and its reciprocal)	1.512	0.6615		Ratio (and its reciprocal)	1.721	0.5811
																											28			1				95% CI of ratio	0.6269 to 3.106	0.3220 to 1.595		95% CI of ratio	0.6832 to 3.553	0.2814 to 1.464		95% CI of ratio	0.6628 to 3.447	0.2901 to 1.509		95% CI of ratio	0.7546 to 3.925	0.2548 to 1.325
																											60			0
																											42				1			Hazard Ratio (Mantel-Haenszel)	C/E	E/C		Hazard Ratio (Mantel-Haenszel)	B/E	E/B		Hazard Ratio (Mantel-Haenszel)	A/E	E/A		Hazard Ratio (Mantel-Haenszel)	D/E	E/D
																											37				1			Ratio (and its reciprocal)	0.1986	5.036		Ratio (and its reciprocal)	0.09309	10.74		Ratio (and its reciprocal)	0.1138	8.787		Ratio (and its reciprocal)	0.05887	16.99
																											32				1			95% CI of ratio	0.06655 to 0.5925	1.688 to 15.03		95% CI of ratio	0.02750 to 0.3151	3.174 to 36.36		95% CI of ratio	0.03447 to 0.3757	2.661 to 29.01		95% CI of ratio	0.01634 to 0.2121	4.715 to 61.20
																											32				1
																											60				0			Hazard Ratio (logrank)	C/E	E/C		Hazard Ratio (logrank)	B/E	E/B		Hazard Ratio (logrank)	A/E	E/A		Hazard Ratio (logrank)	D/E	E/D
																											37				1			Ratio (and its reciprocal)	0.3568	2.803		Ratio (and its reciprocal)	0.2625	3.809		Ratio (and its reciprocal)	0.286	3.496		Ratio (and its reciprocal)	0.2237	4.471
																											60				0			95% CI of ratio	0.1319 to 0.9649	1.036 to 7.581		95% CI of ratio	0.08799 to 0.7832	1.277 to 11.37		95% CI of ratio	0.09880 to 0.8281	1.208 to 10.12		95% CI of ratio	0.07048 to 0.7098	1.409 to 14.19
																											27				1
																											33				1
																											38				1
																											22					1
																											19					1
																											19					1
																											34					1
																											21					1
																											21					1
																											19					1
