# Supplementary material for: Oxygen levels at the time of activation determine T cell persistence and immunotherapeutic efficacy
Source: eLife journal article supplement (doi:10.7554/elife.84280), 2023-05-11
Supplement: fig3-data1 [file Figure 3 - Source data 1.xlsx]

## Sheet: Fig 3B
EXPERIMENT	Sample:	CD8	CD95	CCR7+	CD27+	CD45RO+	CD62L+	GZMB	TOX	TCF1	PERFORIN	TBET+	LAG3	CD25	TIM3	CD127	CD45RA	CA9	CD73	TIGIT+	EOMES	PD1		CD45RA	<--- paste columns here		MFI values		Norm				data summary
PC068e	PC068d day7 DMSO RV052_Tube_001_001.fcs	51898	15384	6312	5416	19392	6173																				DMSO	FG	FG/DMSO					GZMB	CD27	LAG3	CD8	CD25	TIM3	CD127	CD62L	TIGIT	CA9	CD45RA	CCR7	CD45RO	TOX	TBET	TCF1
	PC068d day7 DMSO RV052_Tube_002_002.fcs	47558	13989	6021	7173	13732	9322																			PC068e	0	0	#DIV/0!				PC068e		0.7234		0.976				0.7632				1.0806	0.7679
	PC068d day7 DMSO RV052_Tube_016_003.fcs	53955	11963	4858	10294	11908	11248																				0	0	#DIV/0!						0.7237		0.7377				0.8023				1.5381	0.5768
	PC068d day7 DMSO RV052_Tube_019_004.fcs	36901	4997	3368	13327	11248	5580																				0	0	#DIV/0!						0.6714		0.9119				0.6576				1.1352	0.5753
	PC068d day7 DMSO RV052_Tube_020_005.fcs	58038	12438	5869	6502	14416	5029																				0	0	#DIV/0!						1.279		1.2338				1.2828				0.9596	0.5524
	PC068d day7 DMSO RV052_Tube_021_006.fcs	46985	6377	4478	17165	10650	5302																				0	0	#DIV/0!						0.8294		0.7529				0.8117				0.8535	0.5223
	PC068d day7 DMSO RV052_Tube_022_007.fcs	34331	8933	5767	11881	10364	6926																				0	0	#DIV/0!						0.8817		1.0097				0.8452				1.0404	0.4069
	PC068d day7 FG RV052_Tube_001_016.fcs	50653	23989	6821	3918	14891	4711																				0	0	#DIV/0!						0.6771		1.1307				0.876				1.1758	0.6668
	PC068d day7 FG RV052_Tube_002_017.fcs	35082	29027	9261	5191	7921	7479																			PC072c	0	0	#DIV/0!				PC072c	0.3384	1.7396		0.7041				0.7839				0.0809	0.5221	0.8119		0.6836
	PC068d day7 FG RV052_Tube_016_018.fcs	49200	17286	5515	6911	6851	7397																				0	0	#DIV/0!					0.3792	1.4029		0.5625				0.7189				0.4085	0.6783	0.7971		0.8195
	PC068d day7 FG RV052_Tube_019_019.fcs	45529	8392	3232	17045	6213	7158																				0	0	#DIV/0!					0.58	0.9609		0.8215				0.6786				1.4199	0.7071	0.9249		1.0316
	PC068d day7 FG RV052_Tube_020_020.fcs	43694	10895	5009	5393	7529	4082																				0	0	#DIV/0!					0.4226	1.2619		0.9386				0.8643				0.0155	0.6227	0.8994		0.7964
	PC068d day7 FG RV052_Tube_021_021.fcs	47443	7663	4659	15135	4334	4481																				0	0	#DIV/0!					0.5524	1.0801		1.1514				1.158				0.3486	0.8309	0.9907		0.8683
	PC068d day7 FG RV052_Tube_022_022.fcs	38817	14788	6781	8045	6911	6067																				0	0	#DIV/0!					0.5579	1.3047		0.5259				0.9415				1.6089	0.8764	1.2072		1.0125
PC072c	a_21_Tube_004_001.fcs	74065	5964	739	9136	9470	8099	6335	1159	1302	580															PC072d	2423	6201	2.55922				PC072d			1.1811	0.8651	1.165	1.0302	0.9195	0.6221	0.9287	1.2601	2.5592	0.8126	0.4477
	a_21_Tube_005_002.fcs	69339	7111	825	7731	7817	6404	5474	1434	1280	647																3055	6033	1.9748							1.0223	1.1712	1.0153	0.8086	0.7933	0.3864	0.6178	1.6598	1.9748	1.0359	0.6641
	a_21_Tube_006_003.fcs	57197	6502	231	4986	11377	9136	4614	826	791	465																3206	7837	2.44448							0.682	1.0774	0.7729	1.2232	0.881	0.7343	0.621	1.1699	2.4445	0.508	0.5502
	a_21_Tube_007_004.fcs	63665	5213	368	10202	9577	6213	3800	1163	1159	518																2682	7513	2.80127							1.005	1.662*	1.5063	1.0778	0.7816	0.4777	0.6701	1.5296	2.8013	1.2069	0.8811
	a_21_Tube_008_005.fcs	51272	5628	245	7253	8373	5664	3266	1179	1086	510																2826	7285	2.57785							1.0803	1.3222	1.0829	1.4457	0.9598	1.0207	0.6607	1.1635	2.5778	0.9633	0.5809
	a_21_Tube_009_006.fcs	44440	5324	179	5462	9449	6133	4472	941	882	502																3570	9702	2.71765							0.7342	2.0382*	1	0.9293	0.8195	0.4665	0.5788	1.5272	2.7176	0.9827	1.1445*
	b_FG 7days_Tube_004_007.fcs	52151	3959	59.8	15893	4944	6349	2144	941	890	468															PC076c	0	0	#DIV/0!				PC076c	0.5676			0.633	1.3476	0.7674	1.3694		1.0188	1.1591		1.151	0.7461		0.8574	0.8129
	b_FG 7days_Tube_005_008.fcs	39004	6226	337	10846	5302	4604	2076	1143	1049	558																0	0	#DIV/0!					0.7479			0.8179	1.0252	0.7104	1.4012		1.4637	1.0988		0.8644	0.7866		1.0672*	0.9617
	b_FG 7days_Tube_006_009.fcs	46985	5125	328	4791	8045	6200	2676	764	816	481																0	0	#DIV/0!					0.4555			0.9146	1.4889	1.2052	1.3499		1.3323	1.0722		0.8755	0.8437		0.8451	0.8552
	b_FG 7days_Tube_007_010.fcs	59758	4614	5.69	12874	5964	5370	1606	1046	923	507																0	0	#DIV/0!					0.5017			0.702	1.1788	0.8523	1.1625		1.0188	0.9746		0.739	0.6474		0.8152	0.8251
	b_FG 7days_Tube_008_011.fcs	59035	5750	85.4	7834	6957	6559	1804	1168	943	499															PC076d	0	0	#DIV/0!				PC076d	0.5494			0.793	2.0046	1.0175	1.1644		0.7244	1.0826		0.5714	0.6936		0.9117	0.874
	b_FG 7days_Tube_009_012.fcs	23371	5191	288	7126	8281	5774	2495	1136	893	503																0	0	#DIV/0!					0.4055			0.823	1.3941	0.779	0.9664		0.9529	0.965		0.7565	0.7427		0.9032	0.7658
PC072d	A1 Well_001.fcs	2972		17327		35715	11810						4506	29731	5293	1851	2423	519	849	46242				2423			0	0	#DIV/0!					0.4744			0.7071	1.2044	0.992	0.9355		1.1877	0.8883		1.1157	0.7756		0.8592	0.7601
	A2 Well_002.fcs	2296		13198		22560	13998						1432	26809	5001	2472	3055	435	1143	38092				3055									outliers identified with grubbs method (alpha=0.05)
	A3 Well_003.fcs	3400		16326		35172	12160						7025	41643	5743	1714	3206	571	1058	51203				3206
	A4 Well_004.fcs	1642		9785		14805	13160						1203	21434	4653	2198	2682	389	1069	31795				2682									statistical analysis
	A5 Well_005.fcs	1682		10276		26486	12742						4447	34216	6428	1666	2826	581	948	46961				2826										GZMB	CD27	LAG3	CD8	CD25	TIM3	CD127	CD62L	TIGIT	CA9	CD45RA	CCR7	CD45RO	TOX	TBET	TCF1
	A6 Well_006.fcs	2119		12231		18393	14205						1603	28664	5619	1956	3570	478	1143	35825				3570									Theoretical mean	1	1	1	1	1	1	1	1	1	1	1	1	1	1	1	1
	C1 Well_013.fcs	2571		14080		15990	7347						5322	34638	5453	1702	6201	654	961	42945				6201									Actual mean	0.5025	1.041	0.9508	0.8868	1.245	0.9876	1.039	0.7838	0.9058	1.196	2.513	0.8942	0.6666	0.9385	0.8653	0.8513
	C2 Well_014.fcs	2689		13672		14981	5409						1464	27220	4044	1961	6033	722	1385	23535				6033									Number of values	13	13	6	24	13	13	13	19	13	13	6	26	25	6	6	13
	C3 Well_015.fcs	3663		8293		19353	8929						4791	32186	7025	1510	7837	668	1224	31795				7837
	C4 Well_016.fcs	2729		11810		13044	6287						1209	32285	5015	1718	7513	595	1702	21305				7513									One sample t test
	C5 Well_017.fcs	2224		9899		15385	13006						4804	37054	9293	1599	7285	676	1227	31028				7285									t, df	t=16.66, df=12	t=0.4443, df=12	t=0.6069, df=5	t=2.600, df=23	t=2.842, df=12	t=0.2098, df=12	t=0.6229, df=12	t=4.209, df=18	t=1.164, df=12	t=2.976, df=12	t=12.70, df=5	t=1.363, df=25	t=12.76, df=24	t=1.003, df=5	t=9.077, df=5	t=5.330, df=12
	C6 Well_018.fcs	4319		12019		21050	6626						1177	28664	5222	1603	9702	730	1928	20736				9702									P value (two tailed)	<0.0001	0.6648	0.5704	0.016	0.0148	0.8373	0.545	0.0005	0.2669	0.0116	<0.0001	0.185	<0.0001	0.3619	0.0003	0.0002
PC076c	DMSO	8828		12089		52811		19237		2763	9814	2033		59040	13276	2515		1905	1773	56884	1047	6870											P value summary	****	ns	ns	*	*	ns	ns	***	ns	*	****	ns	****	ns	***	***
	A6 Well_006.fcs	13044		9814		47398		15249		2429	9240	1829		67259	10516	2515		1842	1619	32483	986	7793											Significant (alpha=0.05)?	Yes	No	No	Yes	Yes	No	No	Yes	No	Yes	Yes	No	Yes	No	Yes	Yes
	A7 Well_007.fcs	17430		6986		28577		16919		2058	7793	2098		38563	10983	2235		1580	1727	20122	988	8039
	A8 Well_008.fcs	14981		13472		43077		14080		2058	7948	2029		57773	9785	2296		1535	1706	61278	1063	8580											How big is the discrepancy?
	7dFG	5588		13915		39401		10919		2246	8980	1743		79563	10188	3444		2208	1794	57952	1019	7859											Discrepancy	-0.4975	0.04122	-0.04918	-0.1132	0.2451	-0.01242	0.03877	-0.2162	-0.09418	0.1962	1.513	-0.1058	-0.3334	-0.06147	-0.1347	-0.1487
	D6 Well_042.fcs	10669		8483		37282		11405		2336	9188	1952		68952	7471	3524		2024	1638	47544	978	10071											SD of discrepancy	0.1077	0.3345	0.1985	0.2133	0.3109	0.2133	0.2244	0.2239	0.2916	0.2377	0.2918	0.3959	0.1306	0.1501	0.03635	0.1006
	D7 Well_043.fcs	15942		6116		24111		7706		1760	6738	1773		57416	13237	3017		1694	1702	26809	922	11742											SEM of discrepancy	0.02987	0.09277	0.08104	0.04353	0.08624	0.05917	0.06224	0.05137	0.08088	0.06592	0.1191	0.07764	0.02612	0.06128	0.01484	0.0279
	D8 Well_044.fcs	10516		9956		27890		7064		1698	6794	1654		68100	8340	2669		1496	1803	62429	968	10456											95% confidence interval	-0.5626 to -0.4324	-0.1609 to 0.2434	-0.2575 to 0.1591	-0.2033 to -0.02315	0.05718 to 0.4330	-0.1413 to 0.1165	-0.09684 to 0.1744	-0.3241 to -0.1083	-0.2704 to 0.08204	0.05257 to 0.3398	1.206 to 1.819	-0.2657 to 0.05407	-0.3873 to -0.2795	-0.2190 to 0.09606	-0.1728 to -0.09655	-0.2095 to -0.08792
PC076d	DMSO	12447		9188		28839		13712		2063	7326	2198		36490	10951	1910		1561	1896	32882	986	6851											R squared (partial eta squared)	0.9585	0.01618	0.06861	0.2272	0.4023	0.003656	0.03132	0.4961	0.1015	0.4247	0.9699	0.06918	0.8716	0.1675	0.9428	0.703
	A6 Well_006.fcs	12705		9006		42681		13160		2400	9591	2241		55321	9618	2353		1798	2114	23182	1055	12019
	A7 Well_007.fcs	12054		7663		36156		32483		2447	10042	2394		39888	10276	2296		1869	1739	16619	1050	9057
	A8 Well_008.fcs	11241		7164		39039		13512		2447	9702	2124		54135	5603	2603		2176	1694	20861	1021	8778
	7dFG	9870		5250		20002		7534		1803	7285	2004		73149	11143	2224		1690	1942	23821	948	9109
	D6 Well_042.fcs	10456		6813		31698		5336		1838	7598	2024		77123	7492	2274		1735	2166	22089	996	13044
	D8 Well_044.fcs	7948		7993		30280		6410		1860	7993	1825		65202	5558	2435		1933	1727	24777	976	12520
[truncated: 3 more columns]

## Sheet: Fig 3C
EXPERIMENT	Sample:	% TD	CD8	CD25	CCR7+	CD45RO+	CD62L+	TIGIT+	TIM3	CD27+	TCF1	GZMB	PFRN	TOX	CD127	CD122	%CD45RA	CD45RA+	LAG3+	PD1+	TBET+	CA9		CD8	<--- paste columns here			MFI values		norm		data summary
PC070a	DAY6 DONOR4old_RV054 NTC 1_007.fcs	0.91	50286	13892	1878	17246	39383																	50286			donor	NTC +	Vhl+	VHL/NTC			GZMB	CD27	LAG3	CD8	CD25	TIM3	CD127	CD62L	TIGIT	CA9	CD45RA	CCR7	CD45RO	TOX	TBET	TCF1	Perforin
	DAY6 DONOR4old_RV054 NTC 2_008.fcs	4.72	45419	14416	1658	18720	26134																	45419		PC070a	O4	50286	45972	0.914211		70a				0.914	1.082			0.843				0.834	1.119
	DAY6 DONOR4old_RV054 VHL 1_005.fcs	7.74	45972	15030	1566	19301	33196																	45972		PC070b	4	44226	38630	0.873468		70b				0.873	0.808			1.112				1.117	0.972
PC070b	DAY6_RV053 d4 NTC 1_001.fcs	8.25	44226	21060	2053	19622	32958																	44226			15	45090	36197	0.802772		70b				0.803	1.416			1.13				1.128	0.859
	DAY6_RV053 d4 VHL 1_002.fcs	6.49	38630	17006	2293	19075	36635																	38630		PC070c	O3	58179	54614	0.938724		70c				0.939	1.039							1.191	0.986
	DAY6_RV053 d15 NTC 1_003.fcs	54.4	45090	26637	2159	38630	9218																	45090			3	49800	45309	0.909819		70c				0.91	1.034							1.112	0.958
	DAY6_RV053 d15 VHL 1_004.fcs	54.3	36197	37710	2435	33196	10412																	36197			8	57197	38075	0.665682		70c				0.666	1.386							1.14	0.793
PC070c	day6 donor 03_NTC_001_006.fcs	9.91	58179	10225	1867	24683																		58179			9	79506	71750	0.902448		70c				0.902	0.738							0.673	1.002
	day6 donor 3_NTC_001_038.fcs	46.9	49800	34663	2257	34414																		49800		PC070d	3	68498	69002	1.00736		70d				1.007	0.856			0.848				1.141	0.973
	day6 donor 03_VHL_001_007.fcs	7.44	54614	10626	2223	24334																		54614			7	67174	69170	1.02971		70d				1.03	0.932			0.821				0.985	0.79
	day6 donor 3_VHL_001_039.fcs	45.9	45309	35850	2509	32958																		45309			16	69170	71926	1.03984		70d				1.04	0.96			0.899				1.117	0.916
	day6 donor 8_NTC_001_022.fcs	74.1	57197	35937	1961	26384																		57197			17	63977	62589	0.978305		70d				0.978	1.074			0.83				1.517	1.154
	day6 donor 8_VHL_001_023.fcs	66.7	38075	49800	2236	20911																		38075		PC070g	2	273488	192308	0.703168		70g				0.703	0.945	0.862			1.003			0.647*	0.836*
	day6 donor 9_NTC_001_030.fcs	52.9	79506	27280	2599	14516																		79506		PC072b	50	4817	8654	1.79655		72b	1.42	40.297*		1.797*	1.414		1.194				7.851*		4.005*	1.11	1.123	0.802*	1.04
	day6 donor 9_VHL_001_031.fcs	51.9	71750	20137	1748	14550																		71750			51	5665	14717	2.59788		72b	1.307	1.259	1.039	2.598*	0.839		0.926	1.012	1.081		1.01		0.966	1.174	1.02	1.13	0.961
PC070d	day6_Tube_089_066.fcs	17	68498	23538	3040	14618	22932																	68498			52	7749	18558	2.39489		72b	1.495	0.938	0.612	2.395*	0.952		1.047	0.91	1.028		0.609		0.906	1.462	1.455	1.227	1.239
	day6_Tube_090_067.fcs	15.2	69002	20137	3469	14217	19438																	69002			53	10577	5322	0.503167		72b	0.931	0.769	0.638	0.503	0.4		1.217	0.732	0.777		0.64		0.92	1.007	0.829	1.127	0.967
	day6_Tube_091_068.fcs	3.81	67174	19622	2391	18200	29236																	67174			54	16085	19469	1.21038		72b	1.182	0.509	0.509	1.21	1.217		1.069	1.32	0.804		1.888*		1.006	1.077	1.025	1.101	1.049
	day6_Tube_092_069.fcs	1.99	69170	18286	2355	14383	23989																	69170			55	21890	18393	0.840247		72b	1.667	0.72	0.598	0.84	0.979		1.073	0.821	1.289		0.972		1.031	1.247	1.355	1.224	1.214
	day6_Tube_093_070.fcs	19.7	69170	25398	2021	14550	21614																	69170		PC072d	120	2058	2043	0.992711		72d		0.763	0.673	0.993	0.884	0.935	1.216	0.742	1.022	1.109	1.047	1.568	1.113
	day6_Tube_094_071.fcs	16.6	71926	24392	2257	13327	19438																	71926			121	2655	1878	0.707345		72d		0.941	0.711	0.707	0.783	0.818	1.278	0.652	0.732	1.212	0.896	1.133	0.913
	day6_Tube_095_072.fcs	20.3	63977	22716	1771	24046	17327																	63977			122	2994	2171	0.725117		72d		0.766	0.964	0.725	0.638	0.756	1.003	0.516	0.768	1.12	0.779	1.516	0.791
	day6_Tube_096_073.fcs	14.1	62589	24392	2686	27739	14383																	62589			123	3809	1773	0.465477		72d		0.849	0.893	0.465	0.847	1.003	1.602*	1.021	0.851	1.334	0.839	1.187	0.71
PC070g	donor2 NTC1.fcs	3.76	273488	145903	25308	250424		43477	12968															273488			124	1588	1221	0.768892		72d		1.017	1.487*	0.769	1.06	0.934	1.05	0.737	0.991	1.197	0.992	1.231	1.09
	donor2 VHL1.fcs	8.92	192308	137899	16374	209334		43612	11176															192308								outliers identified with grubbs method (alpha=0.05)
PC072b	A1 Well_001.fcs	0.59	4817	13160		9899	n/a	n/a		451	4251	6287	6499	2590	4653	1910	33.3	1032	n/a	2552	6016			4817
	B1 Well_002.fcs	2.5	5665	28664		57416	14981	19586		22492	3626	5015	7598	3048	6000	3543	88.6	9149	5649	19586	7641			5665								statistical analysis
	C1 Well_003.fcs	8.26	7749	46672		63801	9240	42029		11405	3682	19411	14761	5468	3323	6167	49	6185	17224	15070	16277			7749									GZMB	CD27	LAG3	CD8	CD25	TIM3	CD127	CD62L	TIGIT	CA9	CD45RA	CCR7	CD45RO	TOX	TBET	TCF1	Perforin
	D1 Well_004.fcs	0.91	10577	22089		41772	15895	18338		16719	3645	6499	6445	2552	4542	3552	84.7	6430	3314	16719	8199			10577								Theoretical mean	1	1	1	1	1	1	1	1	1	1	1	1	1	1	1	1	1
	E1 Well_005.fcs	1.48	16085	20427		47839	12705	12557		17958	5743	9400	14717	4119	6339	2812	81.2	5277	5365	10486	6066			16085								Actual mean	1.334	0.8531	0.7374	0.8489	0.9688	0.8847	1.107	0.8792	0.9405	1.194	0.8649	1.162	0.9509	1.18	1.135	1.162	1.078
	F1 Well_006.fcs	2.14	21890	16719		42550	14761	20183		21050	5208	7124	12411	3071	5236	3063	77	8675	9899	12195	5951			21890								Number of values	6	10	9	20	23	6	10	17	11	5	9	16	21	6	6	5	6
	A2 Well_007.fcs	1.24	8654	18614		39644	15801	17535		18174	3409	8929	6757	2876	5558	3166	81.5	8102	5603	17745	6757			8654
	B2 Well_008.fcs	1.66	14717	24038		55492	15159	21177		28317	4098	6553	7305	3579	5558	3323	91.5	9236	5870	17430	7793			14717								One sample t test
	C2 Well_009.fcs	4.59	18558	44425		57773	8411	43210		10700	4518	29015	18283	7993	3479	4163	64.9	3766	10547	14545	23677			18558								t, df	t=3.179, df=5	t=2.305, df=9	t=4.299, df=8	t=3.662, df=19	t=0.6208, df=22	t=3.140, df=5	t=3.017, df=9	t=2.559, df=16	t=1.161, df=10	t=4.813, df=4	t=2.520, df=8	t=2.787, df=15	t=1.910, df=20	t=2.732, df=5	t=1.418, df=5	t=6.107, df=4	t=1.591, df=5
	D2 Well_010.fcs	0.4	5322	8828		38444	11640	14247		12855	4109	6050	6235	2571	5528	3086	93.3	4118	2114	9400	6794			5322								P value (two tailed)	0.02	0.05	0.003	0.002	0.54	0.03	0.01	0.02	0.27	0.009	0.04	0.01	0.07	0.04	0.22	0.004	0.17
	E2 Well_011.fcs	0.74	19469	24852		48135	16768	10100		9135	6322	11111	15431	4435	6775	3940	100	9964	2729	7045	6218			19469								P value summary	*	*	**	**	ns	*	*	*	ns	**	*	*	ns	*	ns	**	ns
	F2 Well_012.fcs	1.71	18393	16374		43881	12124	26008		15159	6375	11879	15070	3829	5619	3552	74.6	8435	5918	12968	8061			18393								Significant (alpha=0.05)?	Yes	Yes	Yes	Yes	No	Yes	Yes	Yes	No	Yes	Yes	Yes	No	Yes	No	Yes	No
PC072d	E1 Well_025.fcs	8.99	2058	44700	15895	36267	26325	86817	5438	7837					3561	1168		1503	3488			835		2058
	E2 Well_026.fcs	1.76	2655	25155	15523	29282	20924	63801	4728	12594					5513	1365		2490	1517			786		2655								How big is the discrepancy?
	E3 Well_027.fcs	5.22	2994	69598	15431	52811	36941	87089	7684	8703					4119	1666		2330	2376			898		2994								Discrepancy	0.3337	-0.1469	-0.2626	-0.1512	-0.03117	-0.1153	0.1073	-0.1208	-0.05945	0.1944	-0.1351	0.1619	-0.04914	0.1795	0.1345	0.1618	0.07833
	E4 Well_028.fcs	1.01	3809	27302	13834	31218	25308	58132	5152	17798					4948	1186		3071	1273			604		3809								SD of discrepancy	0.2571	0.2015	0.1832	0.1846	0.2408	0.08998	0.1125	0.1946	0.1699	0.09032	0.1608	0.2324	0.1179	0.1609	0.2323	0.05924	0.1206
	E5 Well_029.fcs	27.3	1588	49799	11742	33594	10669	96535	8878	6270					2129	115		3025	6375			762		1588								SEM of discrepancy	0.105	0.06372	0.06107	0.04128	0.05021	0.03673	0.03556	0.04721	0.05122	0.04039	0.05361	0.05809	0.02573	0.0657	0.09485	0.02649	0.04923
	F1 Well_031.fcs	5.21	2043	39522	24927	40382	19528	88734	5083	5983					4331	1120		1573	2347			926		2043								95% confidence interval	0.06388 to 0.6035	-0.2911 to -0.002746	-0.4034 to -0.1217	-0.2375 to -0.06476	-0.1353 to 0.07296	-0.2098 to -0.02090	0.02685 to 0.1877	-0.2209 to -0.02074	-0.1736 to 0.05466	0.08225 to 0.3066	-0.2587 to -0.01149	0.03806 to 0.2857	-0.1028 to 0.004537	0.01062 to 0.3484	-0.1093 to 0.3783	0.08824 to 0.2354	-0.04822 to 0.2049
	F2 Well_032.fcs	0.83	1878	19704	17587	26728	13632	46672	3869	11845					7045	1307		2230	1079			953		1878								R squared (partial eta squared)	0.669	0.3713	0.6979	0.4137	0.01722	0.6635	0.5029	0.2905	0.1188	0.8527	0.4426	0.3411	0.1542	0.5989	0.2868	0.9031	0.3361
	F3 Well_033.fcs	2.75	2171	44425	23393	41772	19065	66843	5806	6663					4130	1471		1816	2291			1006		2171
	F4 Well_034.fcs	0.7	1773	23112	16423	22156	25850	49492	5166	15114					7926	1195		2578	1137			806		1773
	F5 Well_035.fcs	23.9	1221	52811	14459	36602	7859	95635	8293	6375					2235	-60		3002	9481			912		1221

## Sheet: Fig 3D
Data summary				RAW values + normalization																																								XY graph
	21%	FG							number of E:T ratios											Resazurin absorbance											%cytotoxicity														21%
[Agonist] vs. normalized response				#	Sample:	%RQR8+	Cells/ml	total td cells	1	2	3	4	5	6	7	8	9	10	11	1	2	3	4	5	6	7	8	9	10	11	1	2	3	4	5	6	7	8	9	10	11			Donor	03	8	9	7	16
Best-fit values				1	PC068d day7 DMSO RV052_Tube_001_001.fcs	14.5	7.3	0.52925	79387.5	39693.8	19846.9	9923.44	4961.72	2480.86	1240.43	620.215	310.107	155.054	77.5269	6293	6377	7381	11182	15754	18978	24089	25720	27125	28204	27942	94.244	93.9061	89.8677	74.5787	56.1884	43.2203	22.662	16.1015	10.4501	6.10997	7.16383	1
EC50	0.2729	1.255		2	PC068d day7 FG RV052_Tube_001_016.fcs	37.2	4.18	0.77748	116622	58311	29155.5	14577.8	7288.88	3644.44	1822.22	911.109	455.555	227.777	113.889	7392	9632	14382	18414	21271	22754	26469	27285	27067	27513	27195	89.8234	80.8133	61.7071	45.4889	33.997	28.0319	13.0888	9.80652	10.6834	8.88943	10.1685	2		ET ratio
logEC50	-0.5639	0.09871		3	PC068d day7 DMSO RV052_Tube_002_002.fcs	22.2	5.85	0.64935	97402.5	48701.2	24350.6	12175.3	6087.66	3043.83	1521.91	760.957	380.479	190.239	95.1196	6606	6143	5989	6119	7879	13555	18093	21437	23391	24808	26451	92.985	94.8474	95.4668	94.9439	87.8645	65.0336	46.7801	33.3293	25.4696	19.7699	13.1612	3		7.93875	94.24
95% CI (profile likelihood)				4	PC068d day7 FG RV052_Tube_002_017.fcs	55.3	1.23	0.340095	51014.2	25507.1	12753.6	6376.78	3188.39	1594.2	797.098	398.549	199.274	99.6372	49.8186	8590	12885	17534	21417	22871	25355	27987	28463	28342	29792	29809	85.0046	67.7286	49.0286	33.4098	27.5612	17.5697	6.98282	5.06818	5.55489	-0.277543	-0.345923	4		3.96938	93.91
EC50	0.2408 to 0.3093	1.039 to 1.516		5	PC068d day7 DMSO RV052_Tube_016_003.fcs	13.6	11.5	0.782	117300	58650	29325	14662.5	7331.25	3665.62	1832.81	916.406	458.203	229.102	114.551	6687	6418	6315	7485	10518	15172	18898	22664	24341	27396	27324	92.6592	93.7412	94.1555	89.4493	77.2495	58.5294	43.5421	28.3939	21.6484	9.36004	9.64965	5		1.98469	89.87
logEC50	-0.6184 to -0.5096	0.01677 to 0.1806		6	PC068d day7 FG RV052_Tube_016_018.fcs	28.9	9.59	1.38576	207863	103932	51965.8	25982.9	12991.5	6495.73	3247.86	1623.93	811.966	405.983	202.991	7078	7682	9157	12754	17453	20190	22726	24503	25844	27065	26766	91.0864	88.6569	82.7239	68.2555	49.3544	38.3452	28.1445	20.9967	15.6028	10.6914	11.8941	6		0.99234	74.58
Goodness of Fit				7	PC068d day7 DMSO RV052_Tube_019_004.fcs	13.8	13.9	0.9591	143865	71932.5	35966.2	17983.1	8991.56	4495.78	2247.89	1123.95	561.973	280.986	140.493	6137	5490	6123	8074	10995	16169	20479	23449	25009	26205	26449	94.8715	97.474	94.9278	87.0802	75.3308	54.5191	37.1827	25.2363	18.9614	14.1507	13.1692	7		0.49617	56.19
Degrees of Freedom	76	76		8	PC068d day7 FG RV052_Tube_019_019.fcs	20.2	13.4	1.3534	203010	101505	50752.5	25376.2	12688.1	6344.06	3172.03	1586.02	793.008	396.504	198.252	9115	8750	10518	14707	17533	21615	23831	25850	26899	29050	28435	85.0221	86.28	80.1868	65.7499	56.0105	41.9424	34.3052	27.347	23.7317	16.3186	18.4381	8		0.24809	43.22
R squared	0.9416	0.8417		9	PC068d day7 DMSO RV052_Tube_020_005.fcs	15.8	13.6	1.0744	161160	80580	40290	20145	10072.5	5036.25	2518.12	1259.06	629.531	314.766	157.383	7924	6943	8492	12807	16465	19449	23781	26431	25945	29246	29276	89.1267	92.5076	87.1691	72.298	59.6912	49.4072	34.4775	25.3446	27.0196	15.6431	15.5397	9		0.12404	22.66
Sum of Squares	4595	9043		10	PC068d day7 FG RV052_Tube_020_020.fcs	21.2	13.3	1.4098	211470	105735	52867.5	26433.8	13216.9	6608.44	3304.22	1652.11	826.055	413.027	206.514	14402	11808	15045	19279	21218	22758	25057	25901	28096	29596	30304	66.8011	75.741	64.5851	49.9931	43.3106	38.0032	30.08	27.1712	19.6064	14.4369	11.9968	10		0.06202	16.1
Sy.x	7.776	10.91		11	PC068d day7 DMSO RV052_Tube_021_006.fcs	12.6	18	1.134	170100	85050	42525	21262.5	10631.2	5315.62	2657.81	1328.91	664.453	332.227	166.113	7597	6823	7853	10752	13718	18484	19864	23806	27310	28142	29423	90.2537	92.9211	89.3714	79.3803	69.1584	52.733	47.977	34.3914	22.3153	19.4479	15.0331	11		0.03101	10.45
Constraints				12	PC068d day7 FG RV052_Tube_021_021.fcs	29.3	16.3	2.38795	358192	179096	89548.1	44774.1	22387	11193.5	5596.76	2798.38	1399.19	699.595	349.797	14030	12463	15570	18924	19665	21753	23841	28907	28052	28720	30501	68.0831	73.4836	62.7757	51.2166	48.6628	41.4668	34.2707	16.8114	19.7581	17.4559	11.3179	12		0.01551	6.11
EC50	EC50 > 0	EC50 > 0		13	PC068d day7 DMSO RV052_Tube_022_007.fcs	14.7	13.1	0.96285	144428	72213.8	36106.9	18053.4	9026.72	4513.36	2256.68	1128.34	564.17	282.085	141.042	7496	6396	6634	7604	11344	15902	20614	23886	26167	27958	28769	90.6017	94.3927	93.5725	90.2295	77.3401	61.6315	45.3922	34.1157	26.2545	20.082	17.287	13		0.00775	7.16
				14	PC068d day7 FG RV052_Tube_022_022.fcs	34.6	10.4	1.7992	269880	134940	67470	33735	16867.5	8433.75	4216.88	2108.44	1054.22	527.109	263.555	9863	7484	9123	13413	15996	20288	23947	24967	27769	28506	28932	82.4442	90.6431	84.9945	70.2095	61.3076	46.5157	33.9054	30.3901	20.7334	18.1934	16.7253	14		9.74025		92.98
Number of points									highest E:T ratio										lowest ET ratio	RAW values											Normalized values													4.87013		94.85
# of X values	539	1078																																										2.43506		95.47
# Y values analyzed	77	77								DMSO	FG									1 to 7	1	2	3	4	5	6	7	8	9	10	11	12												1.21753		94.94
	EC50 values (E:T ratio)									1	2									A	6293	6377	7381	11182	15754	18978	24089	25720	27125	28204	27942	4941		4862	NEG CT									0.60877		87.86
	DMSO	FG-4592								3	4									B	7392	9632	14382	18414	21271	22754	26469	27285	27067	27513	27195	4913		29723	POS CT									0.30438		65.03
	4025	21738								5	6									C	6606	6143	5989	6119	7879	13555	18093	21437	23391	24808	26451	4857												0.15219		46.78
	1746	13018								7	8									D	8590	12885	17534	21417	22871	25355	27987	28463	28342	29792	29809	4867												0.0761		33.33
	2417	14014								9	10									E	6687	6418	6315	7485	10518	15172	18898	22664	24341	27396	27324	4878												0.03805		25.47
	4353	11626								11	12									F	7078	7682	9157	12754	17453	20190	22726	24503	25844	27065	26766	4843												0.01902		19.77
	7536	11796								13	14									G	6137	5490	6123	8074	10995	16169	20479	23449	25009	26205	26449	4818												0.00951		13.16
	4543	13851																		H	29561	29773	29723	29587	29814	29532	29641	30995	30142	31033	29438	4803												11.73			92.66
	3203	11396																		ct vs fg 7 days																								5.865			93.74
Normality test																				8 to 14	1	2	3	4	5	6	7	8	9	10	11	12												2.9325			94.16
Shapiro-Wilk test	DMSO	FG-4592																		A	9115	8750	10518	14707	17533	21615	23831	25850	26899	29050	28435	4865		4769	NEG CT									1.46625			89.45
W	0.9217	0.7122																		B	7924	6943	8492	12807	16465	19449	23781	26431	25945	29246	29276	4859		33785	POS CT									0.73313			77.25
P value	0.483	0.005																		C	14402	11808	15045	19279	21218	22758	25057	25901	28096	29596	30304	4777												0.36656			58.53
Passed normality test (alpha=0.05)?	Yes	No																		D	7597	6823	7853	10752	13718	18484	19864	23806	27310	28142	29423	4771												0.18328			43.54
P value summary	ns	**																		E	14030	12463	15570	18924	19665	21753	23841	28907	28052	28720	30501	4750												0.09164			28.39
Statistical analysis																				F	7496	6396	6634	7604	11344	15902	20614	23886	26167	27958	28769	4740												0.04582			21.65
Wilcoxon matched-pairs signed rank test																				G	9863	7484	9123	13413	15996	20288	23947	24967	27769	28506	28932	4728												0.02291			9.36
P value	0.0156																			H	33785	34020	33894	34176	34650	33231	33870	33439	33194	32549	31941	4767												0.01146			9.65
Exact or approximate P value?	Exact																																											14.3865				94.87
P value summary	*																																											7.19325				97.47
Significantly different (P < 0.05)?	Yes																																											3.59663				94.93
One- or two-tailed P value?	Two-tailed																																											1.79831				87.08
Sum of positive, negative ranks	28.00 , 0.000																																											0.89916				75.33
Sum of signed ranks (W)	28																																											0.44958				54.52
Number of pairs	7																																											0.22479				37.18
Number of ties (ignored)	0																																											0.11239				25.24
																																												0.0562				18.96
																																												0.0281				14.15
																																												0.01405				13.17
																																												16.116					89.13
																																												8.058					92.51
																																												4.029					87.17
																																												2.0145					72.3
																																												1.00725					59.69
																																												0.50363					49.41
																																												0.25181					34.48
																																												0.12591					25.34
																																												0.06295					27.02
																																												0.03148					15.64
																																												0.01574					15.54
																																												17.01
																																												8.505
																																												4.2525
																																												2.12625
																																												1.06313
																																												0.53156
																																												0.26578
																																												0.13289
																																												0.06645
																																												0.03322
																																												0.01661
																																												14.4428
																																												7.22138
																																												3.61069
																																												1.80534
																																												0.90267
																																												0.45134
																																												0.22567
																																												0.11283
																																												0.05642
																																												0.02821
																																												0.0141
																																												11.6622
																																												5.8311
																																												2.91555
																																												1.45778
																																												0.72889
																																												0.36444
																																												0.18222
																																												0.09111
																																												0.04556
																																												0.02278
																																												0.01139
																																												5.10143
																																												2.55071
																																												1.27536
																																												0.63768
																																												0.31884
																																												0.15942
																																												0.07971
																																												0.03985
																																												0.01993
																																												0.00996
																																												0.00498
																																												20.7863
																																												10.3932
																																												5.19658
																																												2.59829
																																												1.29915
																																												0.64957
																																												0.32479
																																												0.16239
																																												0.0812
																																												0.0406
																																												0.0203
																																												20.301
																																												10.1505
																																												5.07525
																																												2.53763
																																												1.26881
																																												0.63441
																																												0.3172
																																												0.1586
																																												0.0793
																																												0.03965
																																												0.01983
																																												21.147
																																												10.5735
																																												5.28675
																																												2.64338
																																												1.32169
																																												0.66084
																																												0.33042
																																												0.16521
																																												0.08261
																																												0.0413
																																												0.02065
																																												35.8192
																																												17.9096
																																												8.95481
																																												4.47741
																																												2.2387
																																												1.11935
																																												0.55968
																																												0.27984
																																												0.13992
																																												0.06996
																																												0.03498
																																												26.988
																																												13.494
																																												6.747
																																												3.3735
																																												1.68675
																																												0.84338
																																												0.42169
																																												0.21084
																																												0.10542
																																												0.05271
																																												0.02636
[truncated: 7 more columns]

## Sheet: Fig 3E
Data summary				Experiment ID / donor #		Resazurin absorbance values																% cytotoxicity																							XY graph
	NTC shRNA	VHL shRNA		PC070b donor 04	T cell # ->	20000	10000	5000	2500	1250	625	313	Pos CT (no T cells)			Neg CT (no cancer cells and no T cells)						20000	10000	5000	2500	1250	625	313																	NTC shRNA
[Agonist] vs. normalized response					04 VHL	8387	8481	10646	13187	16020	17689	19270	23030	21769	22011	8149	8181	8066	8137	7995	7981	97.5536	96.8821	81.4144	63.2604	43.0202	31.0961	19.8008																ET ratio\donor	04	03	8	3	7
Best-fit values					04 NTC	8427	9132	12455	14233	16467	18385	18852	22158	21092	22189	8098	8151	7995	8025	7897	7860	97.2679	92.231	68.4901	55.7873	39.8266	26.1236	22.7872																20000	97.2679			73
EC50	2233	1742				Resazurin absorbance values																% cytotoxicity																						10000	92.231	39.08	29.03	61.94
logEC50	3.349	3.241		PC070c donor 03 and 8	T cell # ->	10000	5000	2500	1250	625		Pos CT			Neg CT							10000	5000	2500	1250	625																		5000	68.4901	29.07	19.57	44.94	54.29
95% CI (profile likelihood)					8 VHL	17813	18878	19493	19877	19968		22004	23082		7797	7911						32.201	24.9506	20.7638	18.1496	17.5301																		2500	55.7873	18.34	18.68	33.97	38.41
EC50	1859 to 2681	1449 to 2094			8 NTC	18279	19669	19799	19968	21173												29.0285	19.5657	18.6806	17.5301	9.32671																		1250	39.8266	15.28	17.53	25.47	30.27
logEC50	3.269 to 3.428	3.161 to 3.321			03 VHL	14116	16443	17850	18729	20316		22543			7854							57.3695	41.5277	31.9491	25.965	15.161																		625	26.1236	13.55	9.33	20.06	14.04
Goodness of Fit					03 NTC	16803	18273	19849	20298	20552												39.0769	29.0694	18.3403	15.2835	13.5544																		312.5	22.7872			8.33	6
Degrees of Freedom	123	128				Resazurin absorbance values																% cytotoxicity																						156.25				6.98	1.91
R squared	0.7348	0.7154		PC070d donor 3 7 16 and 17	T cell # ↓	3 NTC	3 VHL	7 NTC	7 VHL	16 NTC	16 VHL	17 NTC	17 VHL	Pos CT				Neg CT				3 NTC	3 VHL	7 NTC	7 VHL	16 NTC	16 VHL	17 NTC	17 VHL															23029.8
Sum of Squares	30060	32977			20000	9393				7962	7999	8155	8004	17777	17892	17535	17945	6194	6679			72.9951				86.0659	85.728	84.3031	85.6823															11514.9
Sy.x	15.63	16.05			10000	10603	8353			8517	7849	9760	8970	16861	17337	16833	16896					61.9428	82.4945			80.9965	87.0981	69.6429	76.8588															5757.45
Constraints					5000	12464	8973	11441	9179	9140	8186	11247	10152									44.9443	76.8314	54.2885	74.9498	75.306	84.0199	56.0605	66.0623															2878.73
EC50	EC50 > 0	EC50 > 0			2500	13666	11573	13179	11939	13827	9507	12845	11647		pos			neg				33.9651	53.0828	38.4134	49.7397	32.4945	71.9538	41.4642	52.4068															1439.36
					1250	14596	13328	14071	13481	15404	11402	14291	12841		17384.5			6436.5				25.4704	37.0524	30.2658	35.6549	18.0901	54.6447	28.2563	41.5007															719.68
Number of points					625	15188	14647	15847	15711	16402	15294	15109	14519									20.063	25.0046	14.0437	15.2859	8.97424	19.0948	20.7846	26.1737															359.84
# of X values	1190	2268			312.5	16472	15371	16728	15946	15988	15865	15954	15789									8.33486	18.3915	5.99653	13.1394	12.7558	13.8792	13.0663	14.5734															179.92
# Y values analyzed	124	129			156.25	16620	16858	17175	17169	17163	16153	17295	16973									6.98301	4.8091	1.91359	1.9684	2.0232	11.2486	0.817501	3.75868															89.96
	EC50 values (E:T ratio)																																											44.98
donor	shNTC	shVHL		PC070i 7 donors					T cell # per well											Resazurin absorbance											%cytotoxicity													22.49
O4	1751	1351			Sample:	%RQR8+	Cells/ml	total td cells	1	2	3	4	5	6	7	8	9	10	11	1	2	3	4	5	6	7	8	9	10	11	1	2	3	4	5	6	7	8	9	10	11			54447.2
O3	12583	5970			PC068d day7 RV053 NTC_Tube_001_029.fcs	5.86	5.24	0.153532	23029.8	11514.9	5757.45	2878.72	1439.36	719.681	359.841	179.92	89.9602	44.9801	22.49	8372	8149	8837	14717	20238	22856	25243	27360	28656	29758	28210	87.8318	88.5903	86.2502	66.2506	47.472	38.5674	30.4485	23.2479	18.8398	15.0916	20.3568			27223.6
8	18711	14748			PC068d day7 RV053 VHL_Tube_001_036.fcs	6.01	5.84	0.175492	26323.8	13161.9	6580.95	3290.47	1645.24	822.619	411.309	205.655	102.827	51.4137	25.7068	5785	11283	6363	8929	14499	18315	23025	25821	26769	28297	28768	96.631	77.9306	94.6651	85.9373	66.9921	54.0127	37.9926	28.4825	25.2581	20.0609	18.4589			13611.8
3	5331	2209			PC068d day7 RV053 NTC_Tube_002_030.fcs	7.57	9.59	0.362982	54447.2	27223.6	13611.8	6805.9	3402.95	1701.48	850.738	425.369	212.684	106.342	53.1711	6743	6499	6078	6024	7355	12907	16953	21793	25070	27287	27792	93.3726	94.2025	95.6344	95.8181	91.291	72.4069	58.6453	42.183	31.0369	23.4962	21.7785			6805.9
7	3822	2327			PC068d day7 RV053 VHL_Tube_002_037.fcs	7.1	8.19	0.290745	43611.8	21805.9	10902.9	5451.47	2725.73	1362.87	681.434	340.717	170.358	85.1792	42.5896	7193	6941	6086	5821	6688	10677	16431	21623	24984	27813	29465	91.842	92.6991	95.6072	96.5086	93.5596	79.9918	60.4207	42.7612	31.3294	21.7071	16.0882			3402.95
16	3359	1342			PC068d day7 RV053 NTC_Tube_016_031.fcs	5.14	12.8	0.32896	49344	24672	12336	6168	3084	1542	771	385.5	192.75	96.375	48.1875	6017	6217	7709	11260	15778	19595	23263	25460	27620	28855	29594	95.8419	95.1616	90.0869	78.0089	62.6418	49.659	37.183	29.7104	22.3636	18.163	15.6494			1701.48
17	3556	2209			PC068d day7 RV053 VHL_Tube_016_038.fcs	5.16	8.97	0.231426	34713.9	17357	8678.48	4339.24	2169.62	1084.81	542.405	271.202	135.601	67.8006	33.9003	5929	5753	6626	10245	14891	20252	22834	26250	27361	29702	29222	96.1412	96.7399	93.7705	81.4612	65.6587	47.4244	38.6422	27.0233	23.2445	15.2821	16.9147			850.74
PC070i	1111	594.8			PC068d day7 RV053 NTC_Tube_019_032.fcs	2.38	15.3	0.18207	27310.5	13655.2	6827.62	3413.81	1706.91	853.453	426.727	213.363	106.682	53.3408	26.6704	6341	6837	8667	9543	18171	23472	25665	28479	29825	30462	30981	94.7399	93.0528	86.8285	83.8489	54.5025	36.4722	29.0131	19.4418	14.8637	12.6971	10.9318			425.37
	503.7	379			PC068d day7 RV053 VHL_Tube_019_039.fcs	2.86	14.3	0.20449	30673.5	15336.8	7668.38	3834.19	1917.09	958.547	479.273	239.637	119.818	59.9092	29.9546	6581	7379	11717	15955	19714	23171	25862	27953	29337	30373	30580	94.5478	91.8892	77.4367	63.3173	50.7938	39.2764	30.311	23.3446	18.7337	15.2821	14.5925			212.68
	1305	884.2			PC068d day7 RV053 NTC_Tube_020_033.fcs	4.15	8.97	0.186128	27919.1	13959.6	6979.78	3489.89	1744.95	872.473	436.236	218.118	109.059	54.5295	27.2648	6481	7841	10578	16127	19574	22622	25988	27793	29214	30870	30404	94.881	90.35	81.2314	62.7442	51.2602	41.1054	29.8912	23.8777	19.1434	13.6263	15.1788			106.34
	1100	1507			PC068d day7 RV053 VHL_Tube_020_040.fcs	5.84	9.37	0.273604	41040.6	20520.3	10260.1	5130.07	2565.04	1282.52	641.259	320.63	160.315	80.1574	40.0787	5834	7027	8963	12143	16967	21163	24705	26295	28126	29508	30650	97.0365	93.0619	86.6119	76.0174	59.9457	45.9663	34.1657	28.8684	22.7682	18.1639	14.3592			53.17
	1317	1260			PC068d day7 RV053 NTC_Tube_021_034.fcs	3.51	15.7	0.275535	41330.2	20665.1	10332.6	5166.28	2583.14	1291.57	645.785	322.893	161.446	80.7231	40.3616	8156	9137	11305	15809	19943	23056	24705	26932	28974	30147	30470	89.3005	86.0322	78.8093	63.8037	50.0308	39.6595	34.1657	26.7462	19.943	16.035	14.9589			49344
	1955	1905			PC068d day7 RV053 VHL_Tube_021_041.fcs	4.12	13.1	0.26986	40479	20239.5	10119.7	5059.87	2529.94	1264.97	632.484	316.242	158.121	79.0605	39.5303	7320	8720	10977	15567	19349	22586	25749	27832	29820	30448	31262	92.0858	87.4215	79.9021	64.61	52.0098	41.2254	30.6875	23.7477	17.1245	15.0322	12.3203			24672
	975.3	935.6			PC068d day7 RV053 NTC_Tube_022_035.fcs	4.3	13.9	0.29885	44827.5	22413.8	11206.9	5603.44	2801.72	1400.86	700.43	350.215	175.107	87.5537	43.7769	7541	6655	6894	8437	13395	18735	23635	26942	27919	29737	30083	91.3495	94.3013	93.505	88.3643	71.8462	54.0554	37.7305	26.7129	23.4579	17.401	16.2483			12336
Normality test					PC068d day7 RV053 VHL_Tube_022_042.fcs	4.33	13.4	0.29011	43516.5	21758.3	10879.1	5439.56	2719.78	1359.89	679.945	339.973	169.986	84.9932	42.4966	6516	6631	6660	9967	14494	19003	23341	25740	26902	29081	29677	94.7644	94.3812	94.2846	83.267	68.1848	53.1625	38.71	30.7175	26.8461	19.5865	17.6009			6168
Shapiro-Wilk test																				plate 1	plate 2																							3084
W	0.6673	0.5624																	neg CT	4794.5	4944.5																							1542
P value	0.0002	<0.0001																	Pos CT	34195	34960																							771
Passed normality test (alpha=0.05)?	No	No																																										385.5
P value summary	***	****																																										192.75
Statistical analysis																																												96.38
Wilcoxon matched-pairs signed rank test																																												48.19
P value	0.0017																																											27310.5
Exact or approximate P value?	Exact																																											13655.2
P value summary	**																																											6827.63
Significantly different (P < 0.05)?	Yes																																											3413.81
One- or two-tailed P value?	Two-tailed																																											1706.91
Sum of positive, negative ranks	6.000 , -99.00																																											853.45
Sum of signed ranks (W)	-93																																											426.73
Number of pairs	14																																											213.36
Number of ties (ignored)	0																																											106.68
																																												53.34
																																												26.67
																																												27919.1
																																												13959.6
																																												6979.78
																																												3489.89
																																												1744.95
																																												872.47
																																												436.24
																																												218.12
																																												109.06
																																												54.53
																																												27.26
																																												41330.2
																																												20665.1
																																												10332.6
																																												5166.28
																																												2583.14
																																												1291.57
																																												645.79
																																												322.89
																																												161.45
																																												80.72
																																												40.36
																																												44827.5
																																												22413.8
																																												11206.9
																																												5603.44
																																												2801.72
																																												1400.86
																																												700.43
																																												350.21
																																												175.11
																																												87.55
																																												43.78
																																												26323.8
																																												13161.9
																																												6580.95
																																												3290.48
																																												1645.24
																																												822.62
																																												411.31
																																												205.65
																																												102.83
																																												51.41
																																												25.71
																																												43611.8
																																												21805.9
																																												10902.9
																																												5451.47
																																												2725.73
																																												1362.87
																																												681.43
																																												340.72
																																												170.36
																																												85.18
																																												42.59
																																												34713.9
																																												17357
																																												8678.48
																																												4339.24
																																												2169.62
																																												1084.81
																																												542.4
																																												271.2
																																												135.6
																																												67.8
																																												33.9
																																												30673.5
																																												15336.8
																																												7668.38
																																												3834.19
																																												1917.09
																																												958.55
																																												479.27
																																												239.64
																																												119.82
																																												59.91
																																												29.95
																																												41040.6
																																												20520.3
																																												10260.1
																																												5130.08
																																												2565.04
																																												1282.52
																																												641.26
																																												320.63
																																												160.31
																																												80.16
																																												40.08
																																												40479
																																												20239.5
																																												10119.8
																																												5059.88
																																												2529.94
																																												1264.97
																																												632.48
																																												316.24
																																												158.12
																																												79.06
																																												39.53
																																												43516.5
																																												21758.2
																																												10879.1
																																												5439.56
																																												2719.78
																																												1359.89
																																												679.95
																																												339.97
																																												169.99
																																												84.99
																																												42.5
[truncated: 11 more columns]

## Sheet: Fig 3G
Sample:		beads	mouse CD45 counts	human CD45 counts	RQR8+ counts	RQR8- counts	mouse CD45	human CD45	RQR8+		RQR8+		NoACT	CT	FG
PC075b_A1_002.fcs	FG	6229	11880	1182	17	1076	486338	48388.2	695.938		695.938		0	0	695.938
PC075b_A2_003.fcs	CT	6310	10350	626	8	575	418265	25297.9	323.296		323.296		0	323.296	936.303
PC075b_A3_004.fcs	NoT	6289	7046	1	0	1	285694	40.547	0		0		29.5071	40.9968	3169.31
PC075b_B1_005.fcs	CT	6066	2551	0	0	0	107238	0	0		0		0	837.591	1521.44
PC075b_B2_006.fcs	CT	6220	5188	114	1	106	212691	4673.63	40.9968		40.9968		64.0945	653.694	949.66
PC075b_C0_007.fcs	FG	6264	3094	1537	23	1419	125953	62569.4	936.303		936.303			0	3270.89
PC075b_C1_008.fcs	NoT	6503	2910	1	0	1	114109	39.2127	0		0			170.866
PC075b_C2_009.fcs	FG	7885	7890	4652	98	4220	255162	150445	3169.31		3169.31			89.39
PC075b_C3_010.fcs	FG	8045	7666	2169	48	1989	242987	68750.2	1521.44		1521.44			301.815
PC075b_D1_012.fcs	FG	7787	5157	2291	29	2124	168876	75023.1	949.66		949.66		Normality test
PC075b_D2_013.fcs	NoT	8642	6063	31	1	26	178901	914.719	29.5071		29.5071		Shapiro-Wilk test	CT	FG
PC075b_D3_014.fcs	CT	8220	14407	1209	27	1090	446932	37505.5	837.591		837.591		W	0.8548	0.8012
PC075b_D4_015.fcs	CT	8582	21561	1841	22	1695	640650	54702.3	653.694		653.694		P value	0.0842	0.0602
PC075b_E0_016.fcs	FG	7874	13142	5714	101	5250	425605	185048	3270.89		3270.89		Passed normality test (alpha=0.05)?	Yes	Yes
PC075b_E1_017.fcs	CT	7549	10379	17	0	16	350595	574.248	0		0		P value summary	ns	ns
PC075b_E2_018.fcs	NoT	6082	4177	0	0	0	175129	0	0		0		Statistical analysis
PC075b_E4_020.fcs	CT	7462	5196	319	5	286	177564	10901.2	170.866		170.866		Unpaired t test
PC075b_F0_021.fcs	CT	8558	5451	79	3	68	162422	2353.94	89.39		89.39		P value	0.0026
PC075b_F1_022.fcs	NoT	7957	4939	16	2	12	158281	512.756	64.0945		64.0945		P value summary	**
PC075b_F3_024.fcs	CT	7604	7019	960	9	883	235382	32193.6	301.815		301.815		Significantly different (P < 0.05)?	Yes
													One- or two-tailed P value?	Two-tailed
							40ul of blood						t, df	t=3.717, df=13
							10200 beads per well

## Sheet: Fig 3H-I
Tumour volume summary
		HER2_21									HER2_FG						Noact
	day0= ACT	NSG67	NSG71	NSG72	NSG83	NSG84	NSG86	NSG89	NSG90	NSG93	NSG66	NSG75	NSG77	NSG78	NSG81	NSG85	NSG76	NSG82	NSG87	NSG91		Exponential (Malthusian) growth	21% DMSO CT	NoACT	FG
	-22	0	0	0	0	0	0	0	0	0	0	0	0	0	0	0	0	0	0	0		Best-fit values
	-14	29.7	32.2	30	45.6	13.5	27.4	13.5	19.7	22.7	27.4	19.1	39.7	31.5	24.3	13.5	33.7	27.9	18.4	20.1		Y0	163.6	135.1	135.7
	-4	115.4	83.8	190.1	132.9	79.3	63.6	6.1	14.1	23.9	66.7	54.2	88.8	16.4	99.7	6.9	42.3	27.4	108	42		k	0.1213	0.1746	0.06366
	-1	202.5	159	472.4	384.6	196	122.3	9.9	12.9	87.3	210.9	91.3	131	51.9	153.8	23.3	205.2	50.4	171.1	115.3		DoublingTime	5.716	3.971	10.89
T CELLS	0
	1	165.5	268.6	636.5	433.7	323.5	184.6	18	37	158.1	242.4	187.3	393.8	70	155.7	22.1	300.8	72.9	245.1	148.8
	3	223.8	279.3	1001	585.2	576.4	254.6	17.1	129.6	299.9	385.4	338.7	570.3	92.5	219.3	25.3	371.7	54	371.2	243.6
	5	260.1	311.9		575.1	1062.1	320.3	23.9	190.4	281.6	362.4	511.5	915.6	216.6	239.4	43.2	615.3	93.6	420.3	289.7
	7	356.3	410.4		1083.3		441	34.5	239.8	528.2	480.6	672.5	1234.6	224.5	242.5	21.4	796.5	185.9	558.4	412.5
	9	374	317.7				491.8	32.7	344.4	522.2	599.8	1030.2		249	311.9	37.8	1261.3	174.9	681.4	568.6
	11	367.4	329.1				785	55.3	288	590	933.6			357.6	178	36.1		292.4	777.9	675
	13	483.2	413.7				1239.1	43.7	721.3	1054.2	1107.2			161.8	302.7	59.9		379.7	1097.7	1011.7
	16	778.5	1005.1					28.2	2097.7					155.7	352.8	73		1154.1
	19							65.7						299.7	363.1	79.8
	21							95.6						336.5	418.2	72.5
	23							247.5						380.2	446.6	71.5
	26							231						594.4	477.9	68.4
	28							257.1						586.6	650	72.8
	30							427.4						809.1	821.6	60
	33							380.7								84
	35							510.3								84
	37							583
	40							870
		HER2_21									HER2_FG						Noact
Survival analysis
	700mm3	15	14	1	5	3	10	38	12	11	9	7	3	29	28	40	6	14	9	11
	21 DMSO CT	1	1	1	1	1	1	1	1	1
	FG										1	1	1	1	1	0
	NoACT																1	1	1	1
Raw data
Lin	#	Ear#	Cage	Date	Age (w)	Day (0=tumor injection)	Day (0=ACT)	Group	Auto-ID	Cage-ID		Weight	Tumor (a)	Tumor (b)		Weight change (%)	Tumor vol (mm3)
NSG65	1	0	A	2022-03-01	7	0	-22		524677	218780			0	0			0
NSG66	2	1	A	2022-03-01	7	0	-22		524678	218780			0	0			0
NSG67	3	2	A	2022-03-01	7	0	-22		524679	218780			0	0			0
NSG68	4	3	A	2022-03-01	7	0	-22		524680	218780			0	0			0
NSG69	5	4	A	2022-03-01	7	0	-22		524681	218780			0	0			0
NSG70	6	0	B	2022-03-01	7	0	-22		524682	218781			0	0			0
NSG71	7	1	B	2022-03-01	7	0	-22		524683	218781			0	0			0
NSG72	8	2	B	2022-03-01	7	0	-22		524684	218781			0	0			0
NSG73	9	3	B	2022-03-01	7	0	-22		524685	218781			0	0			0
NSG74	10	4	B	2022-03-01	7	0	-22		524686	218781			0	0			0
NSG75	11	0	C	2022-03-01	7	0	-22		524687	218782			0	0			0
NSG76	12	1	C	2022-03-01	7	0	-22		524688	218782			0	0			0
NSG77	13	2	C	2022-03-01	7	0	-22		524689	218782			0	0			0
NSG78	14	3	C	2022-03-01	7	0	-22		524690	218782			0	0			0
NSG79	15	4	C	2022-03-01	7	0	-22		524691	218782			0	0			0
NSG80	16	0	D	2022-03-01	7	0	-22		524692	218783			0	0			0
NSG81	17	1	D	2022-03-01	7	0	-22		524693	218783			0	0			0
NSG82	18	2	D	2022-03-01	7	0	-22		524694	218783			0	0			0
NSG83	19	3	D	2022-03-01	7	0	-22		524695	218783			0	0			0
NSG84	20	4	D	2022-03-01	7	0	-22		524696	218783			0	0			0
NSG85	21	0	E	2022-03-01	7	0	-22		524697	218784			0	0			0
NSG86	22	1	E	2022-03-01	7	0	-22		524698	218784			0	0			0
NSG87	23	2	E	2022-03-01	7	0	-22		524699	218784			0	0			0
NSG88	24	3	E	2022-03-01	7	0	-22		524700	218784			0	0			0
NSG89	25	4	E	2022-03-01	7	0	-22		524701	218784			0	0			0
NSG90	26	0	F	2022-03-01	7	0	-22		524702	218785			0	0			0
NSG91	27	1	F	2022-03-01	7	0	-22		524703	218785			0	0			0
NSG92	28	2	F	2022-03-01	7	0	-22		524704	218785			0	0			0
NSG93	29	3	F	2022-03-01	7	0	-22		524705	218785			0	0			0
NSG94	30	4	F	2022-03-01	7	0	-22		524706	218785			0	0			0
NSG66	2	1	A	2022-03-09	8.14286	8	-14	FG	524678	218780	20.2	20.2	4	3.7		0	27.38
NSG67	3	2	A	2022-03-09	8.14286	8	-14	CT	524679	218780	22	22	3.9	3.9		0	29.6595
NSG68	4	3	A	2022-03-09	8.14286	8	-14	NoT	524680	218780	19.9	19.9	3.2	3.2		0	16.384
NSG69	5	4	A	2022-03-09	8.14286	8	-14		524681	218780	22.6	22.6	4.5	3.7		0	30.8025
NSG70	6	0	B	2022-03-09	8.14286	8	-14		524682	218781	21.4	21.4	0	0		0	0
NSG71	7	1	B	2022-03-09	8.14286	8	-14	NoT	524683	218781	20.9	20.9	3.7	3.3		0	20.1465
NSG72	8	2	B	2022-03-09	8.14286	8	-14	CT	524684	218781	22.7	22.7	4.9	3.5		0	30.0125
NSG73	9	3	B	2022-03-09	8.14286	8	-14		524685	218781	21.3	21.3	4.2	3.8		0	30.324
NSG74	10	4	B	2022-03-09	8.14286	8	-14		524686	218781	21.9	21.9	4.4	4.4		0	42.592
NSG75	11	0	C	2022-03-09	8.14286	8	-14	FG	524687	218782	17.4	17.4	3.5	3.3		0	19.0575
NSG76	12	1	C	2022-03-09	8.14286	8	-14	NoT	524688	218782	22.8	22.8	4.7	3.7		0	32.1715
NSG77	13	2	C	2022-03-09	8.14286	8	-14	FG	524689	218782	23.4	23.4	4.5	4.2		0	39.69
NSG78	14	3	C	2022-03-09	8.14286	8	-14	FG	524690	218782	20.5	20.5	4.6	3.7		0	31.487
NSG79	15	4	C	2022-03-09	8.14286	8	-14		524691	218782	23.5	23.5	4.6	4.3		0	42.527
NSG81	17	1	D	2022-03-09	8.14286	8	-14	FG	524693	218783	20.2	20.2	4.2	3.4		0	24.276
NSG82	18	2	D	2022-03-09	8.14286	8	-14	NoT	524694	218783	18.7	18.7	5.5	3.5		0	33.6875
NSG83	19	3	D	2022-03-09	8.14286	8	-14	CT	524695	218783	18.7	18.7	5.7	4		0	45.6
NSG84	20	4	D	2022-03-09	8.14286	8	-14	CT	524696	218783	18.9	18.9	3	3		0	13.5
NSG85	21	0	E	2022-03-09	8.14286	8	-14	FG	524697	218784	20.3	20.3	3	3		0	13.5
NSG86	22	1	E	2022-03-09	8.14286	8	-14	CT	524698	218784	19.7	19.7	4	3.7		0	27.38
NSG87	23	2	E	2022-03-09	8.14286	8	-14	NoT	524699	218784	18.9	18.9	4.3	3.6		0	27.864
NSG89	25	4	E	2022-03-09	8.14286	8	-14	CT	524701	218784	21.7	21.7	3	3		0	13.5
NSG90	26	0	F	2022-03-09	8.14286	8	-14	CT	524702	218785	19.7	19.7	3.4	3.4		0	19.652
NSG91	27	1	F	2022-03-09	8.14286	8	-14	NoT	524703	218785	19.4	19.4	3.6	3.2		0	18.432
NSG93	29	3	F	2022-03-09	8.14286	8	-14	CT	524705	218785	17.6	17.6	3.7	3.5		0	22.6625
NSG66	2	1	A	2022-03-19	9.57143	18	-4	FG	524678	218780	20.2	20.2	6.3	4.6		0	66.654
NSG67	3	2	A	2022-03-19	9.57143	18	-4	CT	524679	218780	22	22.3	6.2	6.1		1.36364	115.351
NSG68	4	3	A	2022-03-19	9.57143	18	-4	NoT	524680	218780	19.9	21	2.6	2.6		5.52764	8.788
NSG69	5	4	A	2022-03-19	9.57143	18	-4		524681	218780	22.6	24	9.1	8.9		6.19469	360.406
NSG70	6	0	B	2022-03-19	9.57143	18	-4		524682	218781	21.4	23.1	10.5	8.2		7.94393	353.01
NSG71	7	1	B	2022-03-19	9.57143	18	-4	NoT	524683	218781	20.9	21.6	5	4.1		3.34928	42.025
NSG72	8	2	B	2022-03-19	9.57143	18	-4	CT	524684	218781	22.7	23.8	9	6.5		4.84581	190.125
NSG73	9	3	B	2022-03-19	9.57143	18	-4		524685	218781	21.3	22.5	8.8	7.7		5.6338	260.876
NSG74	10	4	B	2022-03-19	9.57143	18	-4		524686	218781	21.9	22.8	12.3	9		4.10959	498.15
NSG75	11	0	C	2022-03-19	9.57143	18	-4	FG	524687	218782	17.4	18.6	5.6	4.4		6.89655	54.208
NSG76	12	1	C	2022-03-19	9.57143	18	-4	NoT	524688	218782	22.8	23.6	6.2	5.2		3.50877	83.824
NSG77	13	2	C	2022-03-19	9.57143	18	-4	FG	524689	218782	23.4	23.6	7.1	5		0.854701	88.75
NSG78	14	3	C	2022-03-19	9.57143	18	-4	FG	524690	218782	20.5	21.8	3.9	2.9		6.34146	16.3995
NSG79	15	4	C	2022-03-19	9.57143	18	-4		524691	218782	23.5	24.3	9.6	7.8		3.40426	292.032
NSG81	17	1	D	2022-03-19	9.57143	18	-4	FG	524693	218783	20.2	21.5	7.1	5.3		6.43564	99.7195
NSG82	18	2	D	2022-03-19	9.57143	18	-4	NoT	524694	218783	18.7	19.8	4.8	4.2		5.88235	42.336
NSG83	19	3	D	2022-03-19	9.57143	18	-4	CT	524695	218783	18.7	19.9	7.9	5.8		6.41711	132.878
NSG84	20	4	D	2022-03-19	9.57143	18	-4	CT	524696	218783	18.9	20.3	6.1	5.1		7.40741	79.3305
NSG85	21	0	E	2022-03-19	9.57143	18	-4	FG	524697	218784	20.3	21.4	2.4	2.4		5.41872	6.912
NSG86	22	1	E	2022-03-19	9.57143	18	-4	CT	524698	218784	19.7	21.2	5.3	4.9		7.61421	63.6265
NSG87	23	2	E	2022-03-19	9.57143	18	-4	NoT	524699	218784	18.9	20.2	3.8	3.8		6.87831	27.436
NSG89	25	4	E	2022-03-19	9.57143	18	-4	CT	524701	218784	21.7	23	2.3	2.3		5.99078	6.0835
NSG90	26	0	F	2022-03-19	9.57143	18	-4	CT	524702	218785	19.7	20.5	3.6	2.8		4.06091	14.112
NSG91	27	1	F	2022-03-19	9.57143	18	-4	NoT	524703	218785	19.4	20.3	6	6		4.63918	108
NSG93	29	3	F	2022-03-19	9.57143	18	-4	CT	524705	218785	17.6	18.1	3.9	3.5		2.84091	23.8875
NSG66	2	1	A	2022-03-22	10	21	-1	FG	524678	218780	20.2	21.1	10.3	6.4		4.45545	210.944
NSG67	3	2	A	2022-03-22	10	21	-1	CT	524679	218780	22	22	7.6	7.3		0	202.502
NSG68	4	3	A	2022-03-22	10	21	-1	NoT	524680	218780	19.9	21.3	3.3	3.3		7.03518	17.9685
NSG69	5	4	A	2022-03-22	10	21	-1		524681	218780	22.6	24.2	13.8	11.5		7.07965	912.525
NSG70	6	0	B	2022-03-22	10	21	-1		524682	218781	21.4	23.9	13.1	11		11.6822	792.55
NSG71	7	1	B	2022-03-22	10	21	-1	NoT	524683	218781	20.9	21.5	7.1	5.7		2.87081	115.34
NSG72	8	2	B	2022-03-22	10	21	-1	CT	524684	218781	22.7	23.6	12.2	8.8		3.96476	472.384
NSG73	9	3	B	2022-03-22	10	21	-1		524685	218781	21.3	22.2	13.1	11.3		4.22535	836.37
NSG74	10	4	B	2022-03-22	10	21	-1		524686	218781	21.9	21.3	14	10.9		-2.73973	831.67
NSG75	11	0	C	2022-03-22	10	21	-1	FG	524687	218782	17.4	18.5	6.5	5.3		6.32184	91.2925
NSG76	12	1	C	2022-03-22	10	21	-1	NoT	524688	218782	22.8	22.4	7.3	6.6		-1.75439	158.994
NSG77	13	2	C	2022-03-22	10	21	-1	FG	524689	218782	23.4	23.6	6.6	6.3		0.854701	130.977
NSG78	14	3	C	2022-03-22	10	21	-1	FG	524690	218782	20.5	22.4	4.7	4.7		9.26829	51.9115
NSG79	15	4	C	2022-03-22	10	21	-1		524691	218782	23.5	25	13.4	11		6.38298	810.7
NSG81	17	1	D	2022-03-22	10	21	-1	FG	524693	218783	20.2	21.2	8	6.2		4.9505	153.76
NSG82	18	2	D	2022-03-22	10	21	-1	NoT	524694	218783	18.7	19.5	7.7	7.3		4.27807	205.166
NSG83	19	3	D	2022-03-22	10	21	-1	CT	524695	218783	18.7	20.7	10.9	8.4		10.6952	384.552
NSG84	20	4	D	2022-03-22	10	21	-1	CT	524696	218783	18.9	20.2	8	7		6.87831	196
NSG85	21	0	E	2022-03-22	10	21	-1	FG	524697	218784	20.3	21.4	3.6	3.6		5.41872	23.328
NSG86	22	1	E	2022-03-22	10	21	-1	CT	524698	218784	19.7	22.5	7.8	5.6		14.2132	122.304
NSG87	23	2	E	2022-03-22	10	21	-1	NoT	524699	218784	18.9	20.7	6.3	4		9.52381	50.4
NSG89	25	4	E	2022-03-22	10	21	-1	CT	524701	218784	21.7	23	4.1	2.2		5.99078	9.922
NSG90	26	0	F	2022-03-22	10	21	-1	CT	524702	218785	19.7	20.7	3.3	2.8		5.07614	12.936
NSG91	27	1	F	2022-03-22	10	21	-1	NoT	524703	218785	19.4	21.2	8.9	6.2		9.27835	171.058
NSG93	29	3	F	2022-03-22	10	21	-1	CT	524705	218785	17.6	18.3	7.9	4.7		3.97727	87.2555
NSG66	2	1	A	2022-03-24	10.2857	23	1	FG	524678	218780	20.2	20.5	10.8	6.7		1.48515	242.406
NSG67	3	2	A	2022-03-24	10.2857	23	1	CT	524679	218780	22	22.5	7.6	6.6		2.27273	165.528
NSG68	4	3	A	2022-03-24	10.2857	23	1	NoT	524680	218780	19.9	21.2	3.7	3.7		6.53266	25.3265
NSG69	5	4	A	2022-03-24	10.2857	23	1		524681	218780	22.6
NSG70	6	0	B	2022-03-24	10.2857	23	1		524682	218781	21.4
NSG71	7	1	B	2022-03-24	10.2857	23	1	NoT	524683	218781	20.9	22.4	7.5	6.3		7.17703	148.838
NSG72	8	2	B	2022-03-24	10.2857	23	1	CT	524684	218781	22.7	24.5	12	10.3		7.92952	636.54
NSG73	9	3	B	2022-03-24	10.2857	23	1		524685	218781	21.3
NSG74	10	4	B	2022-03-24	10.2857	23	1		524686	218781	21.9
NSG75	11	0	C	2022-03-24	10.2857	23	1	FG	524687	218782	17.4	18.8	8.1	6.8		8.04598	187.272
NSG76	12	1	C	2022-03-24	10.2857	23	1	NoT	524688	218782	22.8	23.4	9.3	7.6		2.63158	268.584
NSG77	13	2	C	2022-03-24	10.2857	23	1	FG	524689	218782	23.4	23.4	10.9	8.5		0	393.763
NSG78	14	3	C	2022-03-24	10.2857	23	1	FG	524690	218782	20.5	21.9	5.6	5		6.82927	70
NSG79	15	4	C	2022-03-24	10.2857	23	1		524691	218782	23.5
NSG81	17	1	D	2022-03-24	10.2857	23	1	FG	524693	218783	20.2	22	8.1	6.2		8.91089	155.682
NSG82	18	2	D	2022-03-24	10.2857	23	1	NoT	524694	218783	18.7	20	9.4	8		6.95187	300.8
NSG83	19	3	D	2022-03-24	10.2857	23	1	CT	524695	218783	18.7	21.5	11.2	8.8		14.9733	433.664
NSG84	20	4	D	2022-03-24	10.2857	23	1	CT	524696	218783	18.9	20.6	11.2	7.6		8.99471	323.456
NSG85	21	0	E	2022-03-24	10.2857	23	1	FG	524697	218784	20.3	21.7	4.6	3.1		6.89655	22.103
NSG86	22	1	E	2022-03-24	10.2857	23	1	CT	524698	218784	19.7	22.2	9.3	6.3		12.6904	184.559
NSG87	23	2	E	2022-03-24	10.2857	23	1	NoT	524699	218784	18.9	20.8	6.6	4.7		10.0529	72.897
NSG89	25	4	E	2022-03-24	10.2857	23	1	CT	524701	218784	21.7	23.7	3.3	3.3		9.21659	17.9685
NSG90	26	0	F	2022-03-24	10.2857	23	1	CT	524702	218785	19.7	20.8	4.2	4.2		5.58376	37.044
NSG91	27	1	F	2022-03-24	10.2857	23	1	NoT	524703	218785	19.4	22.2	10.6	6.8		14.433	245.072
NSG93	29	3	F	2022-03-24	10.2857	23	1	CT	524705	218785	17.6	18.1	8.5	6.1		2.84091	158.142
NSG66	2	1	A	2022-03-26	10.5714	25	3	FG	524678	218780	20.2	20.8	13	7.7		2.9703	385.385
NSG67	3	2	A	2022-03-26	10.5714	25	3	CT	524679	218780	22	22.1	8.4	7.3		0.454545	223.818
NSG68	4	3	A	2022-03-26	10.5714	25	3	NoT	524680	218780	19.9	21	4.9	4.7		5.52764	54.1205
NSG69	5	4	A	2022-03-26	10.5714	25	3		524681	218780	22.6
NSG70	6	0	B	2022-03-26	10.5714	25	3		524682	218781	21.4
NSG71	7	1	B	2022-03-26	10.5714	25	3	NoT	524683	218781	20.9	22.3	9.4	7.2		6.69856	243.648
NSG72	8	2	B	2022-03-26	10.5714	25	3	CT	524684	218781	22.7	24.7	13.4	12.2		8.81057	997.228
NSG73	9	3	B	2022-03-26	10.5714	25	3		524685	218781	21.3
NSG74	10	4	B	2022-03-26	10.5714	25	3		524686	218781	21.9
NSG75	11	0	C	2022-03-26	10.5714	25	3	FG	524687	218782	17.4	18.7	9.6	8.4		7.47126	338.688
NSG76	12	1	C	2022-03-26	10.5714	25	3	NoT	524688	218782	22.8	23.4	10.2	7.4		2.63158	279.276
NSG77	13	2	C	2022-03-26	10.5714	25	3	FG	524689	218782	23.4	23.8	14.4	8.9		1.7094	570.312
NSG78	14	3	C	2022-03-26	10.5714	25	3	FG	524690	218782	20.5	22.6	5.9	5.6		10.2439	92.512
NSG79	15	4	C	2022-03-26	10.5714	25	3		524691	218782	23.5
NSG81	17	1	D	2022-03-26	10.5714	25	3	FG	524693	218783	20.2	21.2	8.7	7.1		4.9505	219.283
NSG82	18	2	D	2022-03-26	10.5714	25	3	NoT	524694	218783	18.7	20.5	9.6	8.8		9.62567	371.712
NSG83	19	3	D	2022-03-26	10.5714	25	3	CT	524695	218783	18.7	20	12.7	9.6		6.95187	585.216
NSG84	20	4	D	2022-03-26	10.5714	25	3	CT	524696	218783	18.9	21.1	11.3	10.1		11.6402	576.356
NSG85	21	0	E	2022-03-26	10.5714	25	3	FG	524697	218784	20.3	21.8	3.7	3.7		7.38916	25.3265
NSG86	22	1	E	2022-03-26	10.5714	25	3	CT	524698	218784	19.7	22.9	10.1	7.1		16.2437	254.57
NSG87	23	2	E	2022-03-26	10.5714	25	3	NoT	524699	218784	18.9	20.6	7.1	3.9		8.99471	53.9955
NSG89	25	4	E	2022-03-26	10.5714	25	3	CT	524701	218784	21.7	23.5	3.8	3		8.29493	17.1
NSG90	26	0	F	2022-03-26	10.5714	25	3	CT	524702	218785	19.7	20.4	7.2	6		3.5533	129.6
NSG91	27	1	F	2022-03-26	10.5714	25	3	NoT	524703	218785	19.4	21.9	11.6	8		12.8866	371.2
NSG93	29	3	F	2022-03-26	10.5714	25	3	CT	524705	218785	17.6	18.7	8.5	8.4		6.25	299.88
NSG66	2	1	A	2022-03-28	10.8571	27	5	FG	524678	218780	20.2	21	13.6	7.3		3.9604	362.372
NSG67	3	2	A	2022-03-28	10.8571	27	5	CT	524679	218780	22	23	9.5	7.4		4.54545	260.11
NSG68	4	3	A	2022-03-28	10.8571	27	5	NoT	524680	218780	19.9	22.3	5.6	4.6		12.0603	59.248
NSG69	5	4	A	2022-03-28	10.8571	27	5		524681	218780	22.6
NSG70	6	0	B	2022-03-28	10.8571	27	5		524682	218781	21.4
NSG71	7	1	B	2022-03-28	10.8571	27	5	NoT	524683	218781	20.9	23.5	10.3	7.5		12.4402	289.688
NSG72	8	2	B	2022-03-28	10.8571	27	5	CT	524684	218781	22.7	25.6	15.8	14.8		12.7753	1730.42
NSG73	9	3	B	2022-03-28	10.8571	27	5		524685	218781	21.3
NSG74	10	4	B	2022-03-28	10.8571	27	5		524686	218781	21.9
NSG75	11	0	C	2022-03-28	10.8571	27	5	FG	524687	218782	17.4	20	11.1	9.6		14.9425	511.488
NSG76	12	1	C	2022-03-28	10.8571	27	5	NoT	524688	218782	22.8	24.1	10.8	7.6		5.70175	311.904
NSG77	13	2	C	2022-03-28	10.8571	27	5	FG	524689	218782	23.4	24.4	17.6	10.2		4.2735	915.552
NSG78	14	3	C	2022-03-28	10.8571	27	5	FG	524690	218782	20.5	22.3	7.7	7.5		8.78049	216.562
NSG79	15	4	C	2022-03-28	10.8571	27	5		524691	218782	23.5
NSG81	17	1	D	2022-03-28	10.8571	27	5	FG	524693	218783	20.2	22.2	9.5	7.1		9.90099	239.447
NSG82	18	2	D	2022-03-28	10.8571	27	5	NoT	524694	218783	18.7	20.6	11.6	10.3		10.1604	615.322
NSG83	19	3	D	2022-03-28	10.8571	27	5	CT	524695	218783	18.7	20.3	14.2	9		8.55615	575.1
NSG84	20	4	D	2022-03-28	10.8571	27	5	CT	524696	218783	18.9	21.5	15	11.9		13.7566	1062.08
NSG85	21	0	E	2022-03-28	10.8571	27	5	FG	524697	218784	20.3	21.8	4.9	4.2		7.38916	43.218
NSG86	22	1	E	2022-03-28	10.8571	27	5	CT	524698	218784	19.7	22.1	11.7	7.4		12.1827	320.346
NSG87	23	2	E	2022-03-28	10.8571	27	5	NoT	524699	218784	18.9	20.7	7.8	4.9		9.52381	93.639
NSG89	25	4	E	2022-03-28	10.8571	27	5	CT	524701	218784	21.7	23.5	3.9	3.5		8.29493	23.8875
NSG90	26	0	F	2022-03-28	10.8571	27	5	CT	524702	218785	19.7	21.7	8	6.9		10.1523	190.44
NSG91	27	1	F	2022-03-28	10.8571	27	5	NoT	524703	218785	19.4	22.5	12.5	8.2		15.9794	420.25
NSG93	29	3	F	2022-03-28	10.8571	27	5	CT	524705	218785	17.6	18.9	8.8	8		7.38636	281.6
NSG66	2	1	A	2022-03-30	11.1429	29	7	FG	524678	218780	20.2	21.9	15.4	7.9		8.41584	480.557
NSG67	3	2	A	2022-03-30	11.1429	29	7	CT	524679	218780	22	23.4	10.1	8.4		6.36364	356.328
NSG68	4	3	A	2022-03-30	11.1429	29	7	NoT	524680	218780	19.9	22.5	6.3	5.9		13.0653	109.652
NSG69	5	4	A	2022-03-30	11.1429	29	7		524681	218780	22.6
NSG70	6	0	B	2022-03-30	11.1429	29	7		524682	218781	21.4
NSG71	7	1	B	2022-03-30	11.1429	29	7	CT	524683	218781	20.9	23.9	10.9	8.7		14.3541	412.51
NSG72	8	2	B	2022-03-30	11.1429	29	7	CT	524684	218781	22.7	26.4	18.1	15.9		16.2996	2287.93
NSG73	9	3	B	2022-03-30	11.1429	29	7		524685	218781	21.3
NSG74	10	4	B	2022-03-30	11.1429	29	7		524686	218781	21.9
NSG75	11	0	C	2022-03-30	11.1429	29	7	FG	524687	218782	17.4	21	12.2	10.5		20.6897	672.525
NSG76	12	1	C	2022-03-30	11.1429	29	7	NoT	524688	218782	22.8	23.7	10.6	8.8		3.94737	410.432
NSG77	13	2	C	2022-03-30	11.1429	29	7	FG	524689	218782	23.4	25.6	19	11.4		9.40171	1234.62
NSG78	14	3	C	2022-03-30	11.1429	29	7	FG	524690	218782	20.5	24.1	8.2	7.4		17.561	224.516
NSG79	15	4	C	2022-03-30	11.1429	29	7		524691	218782	23.5
NSG81	17	1	D	2022-03-30	11.1429	29	7	FG	524693	218783	20.2	22.9	9.1	7.3		13.3663	242.469
NSG82	18	2	D	2022-03-30	11.1429	29	7	NoT	524694	218783	18.7	22	12.7	11.2		17.6471	796.544
NSG83	19	3	D	2022-03-30	11.1429	29	7	CT	524695	218783	18.7	20.5	15.3	11.9		9.62567	1083.32
NSG84	20	4	D	2022-03-30	11.1429	29	7	CT	524696	218783	18.9	22.5	15.1	12.9		19.0476	1256.4
NSG85	21	0	E	2022-03-30	11.1429	29	7	FG	524697	218784	20.3	22.5	3.5	3.5		10.8374	21.4375
NSG86	22	1	E	2022-03-30	11.1429	29	7	CT	524698	218784	19.7	23	12.5	8.4		16.7513	441
NSG87	23	2	E	2022-03-30	11.1429	29	7	NoT	524699	218784	18.9	20.7	8.8	6.5		9.52381	185.9
NSG89	25	4	E	2022-03-30	11.1429	29	7	CT	524701	218784	21.7	24.2	4.1	4.1		11.5207	34.4605
NSG90	26	0	F	2022-03-30	11.1429	29	7	CT	524702	218785	19.7	21.9	9	7.3		11.1675	239.805
NSG91	27	1	F	2022-03-30	11.1429	29	7	NoT	524703	218785	19.4	22.3	14.1	8.9		14.9485	558.431
NSG93	29	3	F	2022-03-30	11.1429	29	7	CT	524705	218785	17.6	19.6	11	9.8		11.3636	528.22
NSG66	2	1	A	2022-04-01	11.4286	31	9	FG	524678	218780	20.2	21.5	17	8.4		6.43564	599.76
NSG67	3	2	A	2022-04-01	11.4286	31	9	CT	524679	218780	22	23	11.4	8.1		4.54545	373.977
NSG68	4	3	A	2022-04-01	11.4286	31	9	NoT	524680	218780	19.9	22.4	7.3	5.7		12.5628	118.588
NSG69	5	4	A	2022-04-01	11.4286	31	9		524681	218780	22.6
NSG70	6	0	B	2022-04-01	11.4286	31	9		524682	218781	21.4
NSG71	7	1	B	2022-04-01	11.4286	31	9	CT	524683	218781	20.9	22.4	12.6	9.5		7.17703	568.575
NSG72	8	2	B	2022-04-01	11.4286	31	9	CT	524684	218781	22.7
NSG73	9	3	B	2022-04-01	11.4286	31	9		524685	218781	21.3
NSG74	10	4	B	2022-04-01	11.4286	31	9		524686	218781	21.9
NSG75	11	0	C	2022-04-01	11.4286	31	9	FG	524687	218782	17.4	20.9	13.4	12.4		20.1149	1030.19
NSG76	12	1	C	2022-04-01	11.4286	31	9	NoT	524688	218782	22.8	23	11	7.6		0.877193	317.68
NSG77	13	2	C	2022-04-01	11.4286	31	9	FG	524689	218782	23.4
NSG78	14	3	C	2022-04-01	11.4286	31	9	FG	524690	218782	20.5	22.7	8.4	7.7		10.7317	249.018
NSG79	15	4	C	2022-04-01	11.4286	31	9		524691	218782	23.5
NSG81	17	1	D	2022-04-01	11.4286	31	9	FG	524693	218783	20.2	22	10.8	7.6		8.91089	311.904
NSG82	18	2	D	2022-04-01	11.4286	31	9	NoT	524694	218783	18.7	21.8	14.7	13.1		16.5775	1261.33
NSG83	19	3	D	2022-04-01	11.4286	31	9	CT	524695	218783	18.7	19.4	16.1	12		3.74332	1159.2
NSG84	20	4	D	2022-04-01	11.4286	31	9	CT	524696	218783	18.9
NSG85	21	0	E	2022-04-01	11.4286	31	9	FG	524697	218784	20.3	22	4.5	4.1		8.37438	37.8225
NSG86	22	1	E	2022-04-01	11.4286	31	9	CT	524698	218784	19.7	22	13.3	8.6		11.6751	491.834
NSG87	23	2	E	2022-04-01	11.4286	31	9	NoT	524699	218784	18.9	20.1	9.4	6.1		6.34921	174.887
NSG89	25	4	E	2022-04-01	11.4286	31	9	CT	524701	218784	21.7	22.9	4.3	3.9		5.52995	32.7015
NSG90	26	0	F	2022-04-01	11.4286	31	9	CT	524702	218785	19.7	22	9.1	8.7		11.6751	344.389
NSG91	27	1	F	2022-04-01	11.4286	31	9	NoT	524703	218785	19.4	21.7	15.1	9.5		11.8557	681.387
NSG93	29	3	F	2022-04-01	11.4286	31	9	CT	524705	218785	17.6	19.7	11.1	9.7		11.9318	522.199
NSG66	2	1	A	2022-04-03	11.7143	33	11	FG	524678	218780	20.2	22.3	17.6	10.3		10.396	933.592
NSG67	3	2	A	2022-04-03	11.7143	33	11	CT	524679	218780	22	22.9	11.2	8.1		4.09091	367.416
NSG68	4	3	A	2022-04-03	11.7143	33	11	NoT	524680	218780	19.9	22.3	8	6.5		12.0603	169
NSG69	5	4	A	2022-04-03	11.7143	33	11		524681	218780	22.6
NSG70	6	0	B	2022-04-03	11.7143	33	11		524682	218781	21.4
NSG71	7	1	B	2022-04-03	11.7143	33	11	CT	524683	218781	20.9	24.5	13.5	10		17.2249	675
NSG72	8	2	B	2022-04-03	11.7143	33	11	CT	524684	218781	22.7
NSG73	9	3	B	2022-04-03	11.7143	33	11		524685	218781	21.3
NSG74	10	4	B	2022-04-03	11.7143	33	11		524686	218781	21.9
NSG75	11	0	C	2022-04-03	11.7143	33	11	FG	524687	218782	17.4
NSG76	12	1	C	2022-04-03	11.7143	33	11	NoT	524688	218782	22.8	23.2	11.7	7.5		1.75439	329.062
NSG77	13	2	C	2022-04-03	11.7143	33	11	FG	524689	218782	23.4
NSG78	14	3	C	2022-04-03	11.7143	33	11	FG	524690	218782	20.5	21.9	10.9	8.1		6.82927	357.574
NSG79	15	4	C	2022-04-03	11.7143	33	11		524691	218782	23.5
NSG81	17	1	D	2022-04-03	11.7143	33	11	FG	524693	218783	20.2	23.1	7.7	6.8		14.3564	178.024
NSG82	18	2	D	2022-04-03	11.7143	33	11	NoT	524694	218783	18.7
NSG83	19	3	D	2022-04-03	11.7143	33	11	CT	524695	218783	18.7
NSG84	20	4	D	2022-04-03	11.7143	33	11	CT	524696	218783	18.9
NSG85	21	0	E	2022-04-03	11.7143	33	11	FG	524697	218784	20.3	22.1	5	3.8		8.867	36.1
NSG86	22	1	E	2022-04-03	11.7143	33	11	CT	524698	218784	19.7	22.5	15.7	10		14.2132	785
NSG87	23	2	E	2022-04-03	11.7143	33	11	NoT	524699	218784	18.9	20.9	11.6	7.1		10.582	292.378
NSG89	25	4	E	2022-04-03	11.7143	33	11	CT	524701	218784	21.7	22.8	4.8	4.8		5.06912	55.296
NSG90	26	0	F	2022-04-03	11.7143	33	11	CT	524702	218785	19.7	21.6	9	8		9.64467	288
NSG91	27	1	F	2022-04-03	11.7143	33	11	NoT	524703	218785	19.4	21.8	16.2	9.8		12.3711	777.924
NSG93	29	3	F	2022-04-03	11.7143	33	11	CT	524705	218785	17.6	19.6	11.8	10		11.3636	590
NSG66	2	1	A	2022-04-05	12	35	13	FG	524678	218780	20.2	23.1	18.3	11		14.3564	1107.15
NSG67	3	2	A	2022-04-05	12	35	13	CT	524679	218780	22	23.1	12.2	8.9		5	483.181
NSG68	4	3	A	2022-04-05	12	35	13	NoT	524680	218780	19.9	23.3	9.3	6.9		17.0854	221.387
NSG69	5	4	A	2022-04-05	12	35	13		524681	218780	22.6
NSG70	6	0	B	2022-04-05	12	35	13		524682	218781	21.4
NSG71	7	1	B	2022-04-05	12	35	13	CT	524683	218781	20.9	24.9	15.3	11.5		19.1388	1011.71
NSG72	8	2	B	2022-04-05	12	35	13	CT	524684	218781	22.7
NSG73	9	3	B	2022-04-05	12	35	13		524685	218781	21.3
NSG74	10	4	B	2022-04-05	12	35	13		524686	218781	21.9
NSG75	11	0	C	2022-04-05	12	35	13	FG	524687	218782	17.4
NSG76	12	1	C	2022-04-05	12	35	13	NoT	524688	218782	22.8	24	13.6	7.8		5.26316	413.712
NSG77	13	2	C	2022-04-05	12	35	13	FG	524689	218782	23.4
NSG78	14	3	C	2022-04-05	12	35	13	FG	524690	218782	20.5	23.5	7	6.8		14.6341	161.84
NSG79	15	4	C	2022-04-05	12	35	13		524691	218782	23.5
NSG81	17	1	D	2022-04-05	12	35	13	FG	524693	218783	20.2	22.6	9.7	7.9		11.8812	302.688
NSG82	18	2	D	2022-04-05	12	35	13	NoT	524694	218783	18.7
NSG83	19	3	D	2022-04-05	12	35	13	CT	524695	218783	18.7
NSG84	20	4	D	2022-04-05	12	35	13	CT	524696	218783	18.9
NSG85	21	0	E	2022-04-05	12	35	13	FG	524697	218784	20.3	23.1	5.2	4.8		13.7931	59.904
NSG86	22	1	E	2022-04-05	12	35	13	CT	524698	218784	19.7	23	17.5	11.9		16.7513	1239.09
NSG87	23	2	E	2022-04-05	12	35	13	NoT	524699	218784	18.9	20.9	13.5	7.5		10.582	379.688
NSG89	25	4	E	2022-04-05	12	35	13	CT	524701	218784	21.7	23.6	5.2	4.1		8.75576	43.706
NSG90	26	0	F	2022-04-05	12	35	13	CT	524702	218785	19.7	22.5	11.5	11.2		14.2132	721.28
NSG91	27	1	F	2022-04-05	12	35	13	NoT	524703	218785	19.4	21.8	16.6	11.5		12.3711	1097.67
NSG93	29	3	F	2022-04-05	12	35	13	CT	524705	218785	17.6	20.8	14.4	12.1		18.1818	1054.15
NSG66	2	1	A	2022-04-08	12.4286	38	16	FG	524678	218780	20.2
NSG67	3	2	A	2022-04-08	12.4286	38	16	CT	524679	218780	22	23.2	13.6	10.7		5.45455	778.532
NSG68	4	3	A	2022-04-08	12.4286	38	16	NoT	524680	218780	19.9	22.3	10.6	9.1		12.0603	438.893
NSG69	5	4	A	2022-04-08	12.4286	38	16		524681	218780	22.6
NSG70	6	0	B	2022-04-08	12.4286	38	16		524682	218781	21.4
NSG71	7	1	B	2022-04-08	12.4286	38	16	CT	524683	218781	20.9
NSG72	8	2	B	2022-04-08	12.4286	38	16	CT	524684	218781	22.7
NSG73	9	3	B	2022-04-08	12.4286	38	16		524685	218781	21.3
NSG74	10	4	B	2022-04-08	12.4286	38	16		524686	218781	21.9
NSG75	11	0	C	2022-04-08	12.4286	38	16	FG	524687	218782	17.4
NSG76	12	1	C	2022-04-08	12.4286	38	16	NoT	524688	218782	22.8	24.5	15.2	11.5		7.45614	1005.1
NSG77	13	2	C	2022-04-08	12.4286	38	16	FG	524689	218782	23.4
NSG78	14	3	C	2022-04-08	12.4286	38	16	FG	524690	218782	20.5	23.1	8.1	6.2		12.6829	155.682
NSG79	15	4	C	2022-04-08	12.4286	38	16		524691	218782	23.5
NSG81	17	1	D	2022-04-08	12.4286	38	16	FG	524693	218783	20.2	22.6	10	8.4		11.8812	352.8
NSG82	18	2	D	2022-04-08	12.4286	38	16	NoT	524694	218783	18.7
NSG83	19	3	D	2022-04-08	12.4286	38	16	CT	524695	218783	18.7
NSG84	20	4	D	2022-04-08	12.4286	38	16	CT	524696	218783	18.9
NSG85	21	0	E	2022-04-08	12.4286	38	16	FG	524697	218784	20.3	22.3	5.4	5.2		9.85222	73.008
NSG86	22	1	E	2022-04-08	12.4286	38	16	CT	524698	218784	19.7
NSG87	23	2	E	2022-04-08	12.4286	38	16	NoT	524699	218784	18.9	21.9	16.3	11.9		15.873	1154.12
NSG89	25	4	E	2022-04-08	12.4286	38	16	CT	524701	218784	21.7	24.1	3.9	3.8		11.0599	28.158
NSG90	26	0	F	2022-04-08	12.4286	38	16	CT	524702	218785	19.7	22.4	18.4	15.1		13.7056	2097.69
NSG91	27	1	F	2022-04-08	12.4286	38	16	NoT	524703	218785	19.4
NSG93	29	3	F	2022-04-08	12.4286	38	16	CT	524705	218785	17.6
NSG66	2	1	A	2022-04-11	12.8571	41	19	FG	524678	218780	20.2
NSG67	3	2	A	2022-04-11	12.8571	41	19	CT	524679	218780	22
NSG68	4	3	A	2022-04-11	12.8571	41	19	NoT	524680	218780	19.9	20.6	11.5	7.9		3.51759	358.858
NSG69	5	4	A	2022-04-11	12.8571	41	19		524681	218780	22.6
NSG70	6	0	B	2022-04-11	12.8571	41	19		524682	218781	21.4
NSG71	7	1	B	2022-04-11	12.8571	41	19	CT	524683	218781	20.9
NSG72	8	2	B	2022-04-11	12.8571	41	19	CT	524684	218781	22.7
NSG73	9	3	B	2022-04-11	12.8571	41	19		524685	218781	21.3
NSG74	10	4	B	2022-04-11	12.8571	41	19		524686	218781	21.9
NSG75	11	0	C	2022-04-11	12.8571	41	19	FG	524687	218782	17.4
NSG76	12	1	C	2022-04-11	12.8571	41	19	NoT	524688	218782	22.8
NSG77	13	2	C	2022-04-11	12.8571	41	19	FG	524689	218782	23.4
NSG78	14	3	C	2022-04-11	12.8571	41	19	FG	524690	218782	20.5	23.3	8.7	8.3		13.6585	299.671
NSG79	15	4	C	2022-04-11	12.8571	41	19		524691	218782	23.5
NSG81	17	1	D	2022-04-11	12.8571	41	19	FG	524693	218783	20.2	22.7	10.8	8.2		12.3762	363.096
NSG82	18	2	D	2022-04-11	12.8571	41	19	NoT	524694	218783	18.7
NSG83	19	3	D	2022-04-11	12.8571	41	19	CT	524695	218783	18.7
NSG84	20	4	D	2022-04-11	12.8571	41	19	CT	524696	218783	18.9
NSG85	21	0	E	2022-04-11	12.8571	41	19	FG	524697	218784	20.3	23.3	5.9	5.2		14.7783	79.768
NSG86	22	1	E	2022-04-11	12.8571	41	19	CT	524698	218784	19.7
NSG87	23	2	E	2022-04-11	12.8571	41	19	NoT	524699	218784	18.9
NSG89	25	4	E	2022-04-11	12.8571	41	19	CT	524701	218784	21.7	23.1	5.7	4.8		6.45161	65.664
NSG90	26	0	F	2022-04-11	12.8571	41	19	CT	524702	218785	19.7
NSG91	27	1	F	2022-04-11	12.8571	41	19	NoT	524703	218785	19.4
NSG93	29	3	F	2022-04-11	12.8571	41	19	CT	524705	218785	17.6
NSG66	2	1	A	2022-04-13	13.1429	43	21	FG	524678	218780	20.2
NSG67	3	2	A	2022-04-13	13.1429	43	21	CT	524679	218780	22
NSG68	4	3	A	2022-04-13	13.1429	43	21	NoT	524680	218780	19.9	22.6	11.9	9.1		13.5678	492.719
NSG69	5	4	A	2022-04-13	13.1429	43	21		524681	218780	22.6
NSG70	6	0	B	2022-04-13	13.1429	43	21		524682	218781	21.4
NSG71	7	1	B	2022-04-13	13.1429	43	21	CT	524683	218781	20.9
NSG72	8	2	B	2022-04-13	13.1429	43	21	CT	524684	218781	22.7
NSG73	9	3	B	2022-04-13	13.1429	43	21		524685	218781	21.3
NSG74	10	4	B	2022-04-13	13.1429	43	21		524686	218781	21.9
NSG75	11	0	C	2022-04-13	13.1429	43	21	FG	524687	218782	17.4
NSG76	12	1	C	2022-04-13	13.1429	43	21	NoT	524688	218782	22.8
NSG77	13	2	C	2022-04-13	13.1429	43	21	FG	524689	218782	23.4
NSG78	14	3	C	2022-04-13	13.1429	43	21	FG	524690	218782	20.5	24.1	9.1	8.6		17.561	336.518
NSG79	15	4	C	2022-04-13	13.1429	43	21		524691	218782	23.5
NSG81	17	1	D	2022-04-13	13.1429	43	21	FG	524693	218783	20.2	22.9	10.8	8.8		13.3663	418.176
NSG82	18	2	D	2022-04-13	13.1429	43	21	NoT	524694	218783	18.7
NSG83	19	3	D	2022-04-13	13.1429	43	21	CT	524695	218783	18.7
NSG84	20	4	D	2022-04-13	13.1429	43	21	CT	524696	218783	18.9
NSG85	21	0	E	2022-04-13	13.1429	43	21	FG	524697	218784	20.3	23.2	5.8	5		14.2857	72.5
NSG86	22	1	E	2022-04-13	13.1429	43	21	CT	524698	218784	19.7
NSG87	23	2	E	2022-04-13	13.1429	43	21	NoT	524699	218784	18.9
NSG89	25	4	E	2022-04-13	13.1429	43	21	CT	524701	218784	21.7	23.8	6.1	5.6		9.67742	95.648
NSG90	26	0	F	2022-04-13	13.1429	43	21	CT	524702	218785	19.7
NSG91	27	1	F	2022-04-13	13.1429	43	21	NoT	524703	218785	19.4
NSG93	29	3	F	2022-04-13	13.1429	43	21	CT	524705	218785	17.6
NSG66	2	1	A	2022-04-15	13.4286	45	23	FG	524678	218780	20.2
NSG67	3	2	A	2022-04-15	13.4286	45	23	CT	524679	218780	22
NSG68	4	3	A	2022-04-15	13.4286	45	23	NoT	524680	218780	19.9
NSG69	5	4	A	2022-04-15	13.4286	45	23		524681	218780	22.6
NSG70	6	0	B	2022-04-15	13.4286	45	23		524682	218781	21.4
NSG71	7	1	B	2022-04-15	13.4286	45	23	CT	524683	218781	20.9
NSG72	8	2	B	2022-04-15	13.4286	45	23	CT	524684	218781	22.7
NSG73	9	3	B	2022-04-15	13.4286	45	23		524685	218781	21.3
NSG74	10	4	B	2022-04-15	13.4286	45	23		524686	218781	21.9
NSG75	11	0	C	2022-04-15	13.4286	45	23	FG	524687	218782	17.4
NSG76	12	1	C	2022-04-15	13.4286	45	23	NoT	524688	218782	22.8
NSG77	13	2	C	2022-04-15	13.4286	45	23	FG	524689	218782	23.4
NSG78	14	3	C	2022-04-15	13.4286	45	23	FG	524690	218782	20.5	23.7	9.6	8.9		15.6098	380.208
NSG79	15	4	C	2022-04-15	13.4286	45	23		524691	218782	23.5
NSG81	17	1	D	2022-04-15	13.4286	45	23	FG	524693	218783	20.2	22.7	11.8	8.7		12.3762	446.571
NSG82	18	2	D	2022-04-15	13.4286	45	23	NoT	524694	218783	18.7
NSG83	19	3	D	2022-04-15	13.4286	45	23	CT	524695	218783	18.7
NSG84	20	4	D	2022-04-15	13.4286	45	23	CT	524696	218783	18.9
NSG85	21	0	E	2022-04-15	13.4286	45	23	FG	524697	218784	20.3	23	5.5	5.1		13.3005	71.5275
NSG86	22	1	E	2022-04-15	13.4286	45	23	CT	524698	218784	19.7
NSG87	23	2	E	2022-04-15	13.4286	45	23	NoT	524699	218784	18.9
NSG89	25	4	E	2022-04-15	13.4286	45	23	CT	524701	218784	21.7	23.1	8.8	7.5		6.45161	247.5
NSG90	26	0	F	2022-04-15	13.4286	45	23	CT	524702	218785	19.7
NSG91	27	1	F	2022-04-15	13.4286	45	23	NoT	524703	218785	19.4
NSG93	29	3	F	2022-04-15	13.4286	45	23	CT	524705	218785	17.6
NSG66	2	1	A	2022-04-18	13.8571	48	26	FG	524678	218780	20.2
NSG67	3	2	A	2022-04-18	13.8571	48	26	CT	524679	218780	22
NSG68	4	3	A	2022-04-18	13.8571	48	26	NoT	524680	218780	19.9
NSG69	5	4	A	2022-04-18	13.8571	48	26		524681	218780	22.6
NSG70	6	0	B	2022-04-18	13.8571	48	26		524682	218781	21.4
NSG71	7	1	B	2022-04-18	13.8571	48	26	CT	524683	218781	20.9
NSG72	8	2	B	2022-04-18	13.8571	48	26	CT	524684	218781	22.7
NSG73	9	3	B	2022-04-18	13.8571	48	26		524685	218781	21.3
NSG74	10	4	B	2022-04-18	13.8571	48	26		524686	218781	21.9
NSG75	11	0	C	2022-04-18	13.8571	48	26	FG	524687	218782	17.4
NSG76	12	1	C	2022-04-18	13.8571	48	26	NoT	524688	218782	22.8
NSG77	13	2	C	2022-04-18	13.8571	48	26	FG	524689	218782	23.4
NSG78	14	3	C	2022-04-18	13.8571	48	26	FG	524690	218782	20.5	22.5	12.9	9.6		9.7561	594.432
NSG79	15	4	C	2022-04-18	13.8571	48	26		524691	218782	23.5
NSG81	17	1	D	2022-04-18	13.8571	48	26	FG	524693	218783	20.2	23.6	11.8	9		16.8317	477.9
NSG82	18	2	D	2022-04-18	13.8571	48	26	NoT	524694	218783	18.7
NSG83	19	3	D	2022-04-18	13.8571	48	26	CT	524695	218783	18.7
NSG84	20	4	D	2022-04-18	13.8571	48	26	CT	524696	218783	18.9
NSG85	21	0	E	2022-04-18	13.8571	48	26	FG	524697	218784	20.3	22.7	5.7	4.9		11.8227	68.4285
NSG86	22	1	E	2022-04-18	13.8571	48	26	CT	524698	218784	19.7
NSG87	23	2	E	2022-04-18	13.8571	48	26	NoT	524699	218784	18.9
NSG89	25	4	E	2022-04-18	13.8571	48	26	CT	524701	218784	21.7	23.7	8	7.6		9.21659	231.04
NSG90	26	0	F	2022-04-18	13.8571	48	26	CT	524702	218785	19.7
NSG91	27	1	F	2022-04-18	13.8571	48	26	NoT	524703	218785	19.4
NSG93	29	3	F	2022-04-18	13.8571	48	26	CT	524705	218785	17.6
NSG66	2	1	A	2022-04-20	14.1429	50	28	FG	524678	218780	20.2
NSG67	3	2	A	2022-04-20	14.1429	50	28	CT	524679	218780	22
NSG68	4	3	A	2022-04-20	14.1429	50	28	NoT	524680	218780	19.9
NSG69	5	4	A	2022-04-20	14.1429	50	28		524681	218780	22.6
NSG70	6	0	B	2022-04-20	14.1429	50	28		524682	218781	21.4
NSG71	7	1	B	2022-04-20	14.1429	50	28	CT	524683	218781	20.9
NSG72	8	2	B	2022-04-20	14.1429	50	28	CT	524684	218781	22.7
NSG73	9	3	B	2022-04-20	14.1429	50	28		524685	218781	21.3
NSG74	10	4	B	2022-04-20	14.1429	50	28		524686	218781	21.9
NSG75	11	0	C	2022-04-20	14.1429	50	28	FG	524687	218782	17.4
NSG76	12	1	C	2022-04-20	14.1429	50	28	NoT	524688	218782	22.8
NSG77	13	2	C	2022-04-20	14.1429	50	28	FG	524689	218782	23.4
NSG78	14	3	C	2022-04-20	14.1429	50	28	FG	524690	218782	20.5	21	11.5	10.1		2.43902	586.557
NSG79	15	4	C	2022-04-20	14.1429	50	28		524691	218782	23.5
NSG81	17	1	D	2022-04-20	14.1429	50	28	FG	524693	218783	20.2	22.2	13	10		9.90099	650
NSG82	18	2	D	2022-04-20	14.1429	50	28	NoT	524694	218783	18.7
NSG83	19	3	D	2022-04-20	14.1429	50	28	CT	524695	218783	18.7
NSG84	20	4	D	2022-04-20	14.1429	50	28	CT	524696	218783	18.9
NSG85	21	0	E	2022-04-20	14.1429	50	28	FG	524697	218784	20.3	22.9	5.6	5.1		12.8079	72.828
NSG86	22	1	E	2022-04-20	14.1429	50	28	CT	524698	218784	19.7
NSG87	23	2	E	2022-04-20	14.1429	50	28	NoT	524699	218784	18.9
NSG89	25	4	E	2022-04-20	14.1429	50	28	CT	524701	218784	21.7	23.5	10.2	7.1		8.29493	257.091
NSG90	26	0	F	2022-04-20	14.1429	50	28	CT	524702	218785	19.7
NSG91	27	1	F	2022-04-20	14.1429	50	28	NoT	524703	218785	19.4
NSG93	29	3	F	2022-04-20	14.1429	50	28	CT	524705	218785	17.6
NSG66	2	1	A	2022-04-22	14.4286	52	30	FG	524678	218780	20.2
NSG67	3	2	A	2022-04-22	14.4286	52	30	CT	524679	218780	22
NSG68	4	3	A	2022-04-22	14.4286	52	30	NoT	524680	218780	19.9
NSG69	5	4	A	2022-04-22	14.4286	52	30		524681	218780	22.6
NSG70	6	0	B	2022-04-22	14.4286	52	30		524682	218781	21.4
NSG71	7	1	B	2022-04-22	14.4286	52	30	CT	524683	218781	20.9
NSG72	8	2	B	2022-04-22	14.4286	52	30	CT	524684	218781	22.7
NSG73	9	3	B	2022-04-22	14.4286	52	30		524685	218781	21.3
NSG74	10	4	B	2022-04-22	14.4286	52	30		524686	218781	21.9
NSG75	11	0	C	2022-04-22	14.4286	52	30	FG	524687	218782	17.4
NSG76	12	1	C	2022-04-22	14.4286	52	30	NoT	524688	218782	22.8
NSG77	13	2	C	2022-04-22	14.4286	52	30	FG	524689	218782	23.4
NSG78	14	3	C	2022-04-22	14.4286	52	30	FG	524690	218782	20.5	20.2	12.9	11.2		-1.46341	809.088
NSG79	15	4	C	2022-04-22	14.4286	52	30		524691	218782	23.5
NSG81	17	1	D	2022-04-22	14.4286	52	30	FG	524693	218783	20.2	22.2	13.1	11.2		9.90099	821.632
NSG82	18	2	D	2022-04-22	14.4286	52	30	NoT	524694	218783	18.7
NSG83	19	3	D	2022-04-22	14.4286	52	30	CT	524695	218783	18.7
NSG84	20	4	D	2022-04-22	14.4286	52	30	CT	524696	218783	18.9
NSG85	21	0	E	2022-04-22	14.4286	52	30	FG	524697	218784	20.3	22.1	5	4.9		8.867	60.025
NSG86	22	1	E	2022-04-22	14.4286	52	30	CT	524698	218784	19.7
NSG87	23	2	E	2022-04-22	14.4286	52	30	NoT	524699	218784	18.9
NSG89	25	4	E	2022-04-22	14.4286	52	30	CT	524701	218784	21.7	23.7	10.1	9.2		9.21659	427.432
NSG90	26	0	F	2022-04-22	14.4286	52	30	CT	524702	218785	19.7
NSG91	27	1	F	2022-04-22	14.4286	52	30	NoT	524703	218785	19.4
NSG93	29	3	F	2022-04-22	14.4286	52	30	CT	524705	218785	17.6
NSG66	2	1	A	2022-04-25	14.8571	55	33	FG	524678	218780	20.2
NSG67	3	2	A	2022-04-25	14.8571	55	33	CT	524679	218780	22
NSG68	4	3	A	2022-04-25	14.8571	55	33	NoT	524680	218780	19.9
NSG69	5	4	A	2022-04-25	14.8571	55	33		524681	218780	22.6
NSG70	6	0	B	2022-04-25	14.8571	55	33		524682	218781	21.4
NSG71	7	1	B	2022-04-25	14.8571	55	33	CT	524683	218781	20.9
NSG72	8	2	B	2022-04-25	14.8571	55	33	CT	524684	218781	22.7
NSG73	9	3	B	2022-04-25	14.8571	55	33		524685	218781	21.3
NSG74	10	4	B	2022-04-25	14.8571	55	33		524686	218781	21.9
NSG75	11	0	C	2022-04-25	14.8571	55	33	FG	524687	218782	17.4
NSG76	12	1	C	2022-04-25	14.8571	55	33	NoT	524688	218782	22.8
NSG77	13	2	C	2022-04-25	14.8571	55	33	FG	524689	218782	23.4
NSG78	14	3	C	2022-04-25	14.8571	55	33	FG	524690	218782	20.5
NSG79	15	4	C	2022-04-25	14.8571	55	33		524691	218782	23.5
NSG81	17	1	D	2022-04-25	14.8571	55	33	FG	524693	218783	20.2
NSG82	18	2	D	2022-04-25	14.8571	55	33	NoT	524694	218783	18.7
NSG83	19	3	D	2022-04-25	14.8571	55	33	CT	524695	218783	18.7
NSG84	20	4	D	2022-04-25	14.8571	55	33	CT	524696	218783	18.9
NSG85	21	0	E	2022-04-25	14.8571	55	33	FG	524697	218784	20.3	22.1	7	4.9		8.867	84.035
NSG86	22	1	E	2022-04-25	14.8571	55	33	CT	524698	218784	19.7
NSG87	23	2	E	2022-04-25	14.8571	55	33	NoT	524699	218784	18.9
NSG89	25	4	E	2022-04-25	14.8571	55	33	CT	524701	218784	21.7	23.9	9.4	9		10.1382	380.7
NSG90	26	0	F	2022-04-25	14.8571	55	33	CT	524702	218785	19.7
NSG91	27	1	F	2022-04-25	14.8571	55	33	NoT	524703	218785	19.4
NSG93	29	3	F	2022-04-25	14.8571	55	33	CT	524705	218785	17.6
NSG66	2	1	A	2022-04-27	15.1429	57	35	FG	524678	218780	20.2
NSG67	3	2	A	2022-04-27	15.1429	57	35	CT	524679	218780	22
NSG68	4	3	A	2022-04-27	15.1429	57	35	NoT	524680	218780	19.9
NSG69	5	4	A	2022-04-27	15.1429	57	35		524681	218780	22.6
NSG70	6	0	B	2022-04-27	15.1429	57	35		524682	218781	21.4
NSG71	7	1	B	2022-04-27	15.1429	57	35	CT	524683	218781	20.9
NSG72	8	2	B	2022-04-27	15.1429	57	35	CT	524684	218781	22.7
NSG73	9	3	B	2022-04-27	15.1429	57	35		524685	218781	21.3
NSG74	10	4	B	2022-04-27	15.1429	57	35		524686	218781	21.9
NSG75	11	0	C	2022-04-27	15.1429	57	35	FG	524687	218782	17.4
NSG76	12	1	C	2022-04-27	15.1429	57	35	NoT	524688	218782	22.8
NSG77	13	2	C	2022-04-27	15.1429	57	35	FG	524689	218782	23.4
NSG78	14	3	C	2022-04-27	15.1429	57	35	FG	524690	218782	20.5
NSG79	15	4	C	2022-04-27	15.1429	57	35		524691	218782	23.5
NSG81	17	1	D	2022-04-27	15.1429	57	35	FG	524693	218783	20.2
NSG82	18	2	D	2022-04-27	15.1429	57	35	NoT	524694	218783	18.7
NSG83	19	3	D	2022-04-27	15.1429	57	35	CT	524695	218783	18.7
NSG84	20	4	D	2022-04-27	15.1429	57	35	CT	524696	218783	18.9
NSG85	21	0	E	2022-04-27	15.1429	57	35	FG	524697	218784	20.3
NSG86	22	1	E	2022-04-27	15.1429	57	35	CT	524698	218784	19.7
NSG87	23	2	E	2022-04-27	15.1429	57	35	NoT	524699	218784	18.9
NSG89	25	4	E	2022-04-27	15.1429	57	35	CT	524701	218784	21.7	24	11.8	9.3		10.5991	510.291
NSG90	26	0	F	2022-04-27	15.1429	57	35	CT	524702	218785	19.7
NSG91	27	1	F	2022-04-27	15.1429	57	35	NoT	524703	218785	19.4
NSG93	29	3	F	2022-04-27	15.1429	57	35	CT	524705	218785	17.6
NSG66	2	1	A	2022-04-29	15.4286	59	37	FG	524678	218780	20.2
NSG67	3	2	A	2022-04-29	15.4286	59	37	CT	524679	218780	22
NSG68	4	3	A	2022-04-29	15.4286	59	37	NoT	524680	218780	19.9
NSG69	5	4	A	2022-04-29	15.4286	59	37		524681	218780	22.6
NSG70	6	0	B	2022-04-29	15.4286	59	37		524682	218781	21.4
NSG71	7	1	B	2022-04-29	15.4286	59	37	CT	524683	218781	20.9
NSG72	8	2	B	2022-04-29	15.4286	59	37	CT	524684	218781	22.7
NSG73	9	3	B	2022-04-29	15.4286	59	37		524685	218781	21.3
NSG74	10	4	B	2022-04-29	15.4286	59	37		524686	218781	21.9
NSG75	11	0	C	2022-04-29	15.4286	59	37	FG	524687	218782	17.4
NSG76	12	1	C	2022-04-29	15.4286	59	37	NoT	524688	218782	22.8
NSG77	13	2	C	2022-04-29	15.4286	59	37	FG	524689	218782	23.4
NSG78	14	3	C	2022-04-29	15.4286	59	37	FG	524690	218782	20.5
NSG79	15	4	C	2022-04-29	15.4286	59	37		524691	218782	23.5
NSG81	17	1	D	2022-04-29	15.4286	59	37	FG	524693	218783	20.2
NSG82	18	2	D	2022-04-29	15.4286	59	37	NoT	524694	218783	18.7
NSG83	19	3	D	2022-04-29	15.4286	59	37	CT	524695	218783	18.7
NSG84	20	4	D	2022-04-29	15.4286	59	37	CT	524696	218783	18.9
NSG85	21	0	E	2022-04-29	15.4286	59	37	FG	524697	218784	20.3
NSG86	22	1	E	2022-04-29	15.4286	59	37	CT	524698	218784	19.7
NSG87	23	2	E	2022-04-29	15.4286	59	37	NoT	524699	218784	18.9
NSG89	25	4	E	2022-04-29	15.4286	59	37	CT	524701	218784	21.7	23.7	10.9	10.4		9.21659	589.472
NSG90	26	0	F	2022-04-29	15.4286	59	37	CT	524702	218785	19.7
NSG91	27	1	F	2022-04-29	15.4286	59	37	NoT	524703	218785	19.4
NSG93	29	3	F	2022-04-29	15.4286	59	37	CT	524705	218785	17.6
NSG66	2	1	A	2022-05-02	15.8571	62	40	FG	524678	218780	20.2
NSG67	3	2	A	2022-05-02	15.8571	62	40	CT	524679	218780	22
NSG68	4	3	A	2022-05-02	15.8571	62	40	NoT	524680	218780	19.9
NSG69	5	4	A	2022-05-02	15.8571	62	40		524681	218780	22.6
NSG70	6	0	B	2022-05-02	15.8571	62	40		524682	218781	21.4
NSG71	7	1	B	2022-05-02	15.8571	62	40	CT	524683	218781	20.9
NSG72	8	2	B	2022-05-02	15.8571	62	40	CT	524684	218781	22.7
NSG73	9	3	B	2022-05-02	15.8571	62	40		524685	218781	21.3
NSG74	10	4	B	2022-05-02	15.8571	62	40		524686	218781	21.9
NSG75	11	0	C	2022-05-02	15.8571	62	40	FG	524687	218782	17.4
NSG76	12	1	C	2022-05-02	15.8571	62	40	NoT	524688	218782	22.8
NSG77	13	2	C	2022-05-02	15.8571	62	40	FG	524689	218782	23.4
NSG78	14	3	C	2022-05-02	15.8571	62	40	FG	524690	218782	20.5
NSG79	15	4	C	2022-05-02	15.8571	62	40		524691	218782	23.5
NSG81	17	1	D	2022-05-02	15.8571	62	40	FG	524693	218783	20.2
NSG82	18	2	D	2022-05-02	15.8571	62	40	NoT	524694	218783	18.7
NSG83	19	3	D	2022-05-02	15.8571	62	40	CT	524695	218783	18.7
NSG84	20	4	D	2022-05-02	15.8571	62	40	CT	524696	218783	18.9
NSG85	21	0	E	2022-05-02	15.8571	62	40	FG	524697	218784	20.3
NSG86	22	1	E	2022-05-02	15.8571	62	40	CT	524698	218784	19.7
NSG87	23	2	E	2022-05-02	15.8571	62	40	NoT	524699	218784	18.9
NSG89	25	4	E	2022-05-02	15.8571	62	40	CT	524701	218784	21.7	24.3	9.5	9		11.9816	384.75
NSG90	26	0	F	2022-05-02	15.8571	62	40	CT	524702	218785	19.7
NSG91	27	1	F	2022-05-02	15.8571	62	40	NoT	524703	218785	19.4
NSG93	29	3	F	2022-05-02	15.8571	62	40	CT	524705	218785	17.6

## Sheet: Fig 3J
Sample:	bead counts	mouse CD45 counts	human CD8 counts	RQR8+ counts	mouse cells	human CD8	RQR8+		RQR8+		NoACT	shNTC	shVHL
For PC 220428_A_000.fcs	6464	9359	0	0	369206	0	0		0		0	44.5026	296.167
For PC 220428_A_001.fcs	5730	5464	4	1	243162	178.01	44.5026		44.5026		38.8069	82.0331	80.4036
For PC 220428_A_002.fcs	5166	4654	9	6	229727	444.251	296.167		296.167		38.6598	45.7728	153.823
For PC 220428_A_003.fcs	6847	5628	5	3	209601	186.213	111.728		111.728		0	168.679	152.878
For PC 220428_A_004.fcs	6343	6295	8	2	253070	321.614	80.4036		80.4036		45.3979	175.953	39.5104
For PC 220428_B_000.fcs	6631	3382	7	4	130057	269.19	153.823		153.823			0	76.074
For PC 220428_B_001.fcs	6672	6619	12	4	252974	458.633	152.878		152.878			0	78.4736
For PC 220428_B_002.fcs	6454	4163	4	1	164482	158.042	39.5104		39.5104			49.3708	81.6653
For PC 220428_B_003.fcs	6704	7753	5	2	294901	190.185	76.074		76.074			46.5924	37.3572
For PC 220428_B_004.fcs	6571	4910	1	1	190542	38.8069	38.8069		38.8069			89.5994	51.536
For PC 220428_C_000.fcs	6499	2843	2	2	111550	78.4736	78.4736		78.4736			122.341	0
For PC 220428_C_001.fcs	6542	5219	6	4	203431	233.873	155.916		155.916				43.8596
For PC 220428_C_002.fcs	6920	4020	5	1	148136	184.249	36.8497		36.8497		Normality test
For PC 220428_C_003.fcs	6909	4652	15	7	171698	553.626	258.359		258.359		Shapiro-Wilk test	shNTC	shVHL
For PC 220428_C_004.fcs	6217	2927	3	2	120055	123.05	82.0331		82.0331		W	0.895	0.82
For PC 220428_D_000.fcs	6613	5953	11	3	229550	424.165	115.681		115.681		P value	0.1367	0.016
For PC 220428_D_001.fcs	5571	3156	2	1	144459	91.5455	45.7728		45.7728		Passed normality test (alpha=0.05)?	Yes	No
For PC 220428_D_002.fcs	6245	4666	3	2	190525	122.498	81.6653		81.6653		P value summary	ns	*
For PC 220428_D_003.fcs	6047	4013	10	4	169227	421.697	168.679		168.679
For PC 220428_D_004.fcs	7264	3554	6	3	124762	210.628	105.314		105.314		Table Analyzed	PC075 blood VHL
For PC 220428_E_000.fcs	6826	3592	4	1	134187	149.429	37.3572		37.3572
For PC 220428_E_001.fcs	5797	4707	10	4	207053	439.883	175.953		175.953		Column B	shVHL
For PC 220428_E_002.fcs	6596	3617	3	1	139832	115.979	38.6598		38.6598		vs.	vs.
For PC 220428_E_003.fcs	6580	6312	5	0	244614	193.769	0		0		Column A	shNTC
For PC 220428_E_004.fcs	5691	3250	0	0	145625	0	0		0		Statistical analysis
For PC 220428_F_000.fcs	5617	6952	2	1	315606	90.7958	45.3979		45.3979		Mann Whitney test
For PC 220428_F_001.fcs	6563	6252	7	2	242916	271.979	77.7084		77.7084		P value	0.9204
For PC 220428_F_002.fcs	6056	2981	8	7	125521	336.856	294.749		294.749		Exact or approximate P value?	Exact
For PC 220428_F_003.fcs	5555	4668	5	3	214283	229.523	137.714		137.714		P value summary	ns
For PC 220428_F_004.fcs	4948	3971	1	1	204649	51.536	51.536		51.536		Significantly different (P < 0.05)?	No
For PC 220428_G_000.fcs	5965	4777	3	0	204214	128.248	0		0		One- or two-tailed P value?	Two-tailed
For PC 220428_G_001.fcs	5933	8408	0	0	361375	0	0		0		Sum of ranks in column A,B	148 , 152
For PC 220428_G_002.fcs	5165	2654	1	1	131030	49.3708	49.3708		49.3708		Mann-Whitney U	70
For PC 220428_G_003.fcs	5838	4988	3	3	217873	131.038	131.038		131.038
For PC 220428_G_004.fcs	5473	3307	2	1	154081	93.1847	46.5924		46.5924
For PC 220428_H_000.fcs	5692	4834	2	2	216562	89.5994	89.5994		89.5994
For PC 220428_H_001.fcs	5103	6775	2	0	338551	99.9412	0		0
For PC 220428_H_002.fcs	5715	4580	4	2	204357	178.478	89.2388		89.2388
For PC 220428_H_003.fcs	6253	8375	3	3	341536	122.341	122.341		122.341
For PC 220428_H_004.fcs	5814	5938	6	1	260439	263.158	43.8596		43.8596
					40ul of blood
					10200 beads per well

## Sheet: Fig 3K-L
Tumour volume summary
		HER2_NTC											NoACT				HER2_VHL
		557271	557284	557286	557288	557291	557293	557301	557302	557304	557305	557308	557279	557292	557294	557295	557272	557274	557275	557276	557277	557278	557280	557287	557290	557299	557306	557309			Exponential (Malthusian) growth
	-16	0	0	0	0	0	0	0	0	0	0	0	0	0	0	0	0	0	0	0	0	0	0	0	0	0	0	0			Best-fit values	shNTC	NoACT	shVHL
	-6	0	17.1	32.4	19.6	10.9	6.8	0	0	0	0	31.2	9.7	9.1	19.7	0	9	0	25.1	33.4	28.1	0	26.1	30.3	0	10.8	3.7	0			Y0	17.45	21.59	22.3
	-3	11.4	41.6	21.1	21.2	25.9	33.5	0	23.9	13.9	14.9	32.2	50.6	37.6	24	6.9	31.1	0	32.7	73	29.4	10.2	48.8	25.9	0	16.8	16.9	0			k	0.07767	0.07369	0.05815
	-1	22	45.6	34.1	57.4	20.1	30.1	0	45.5	16.3	21.8	28.9	84.6	42.5	33.2	35.3	32.9	0	44	89.4	38.8	13	52	28.9	7.9	33.5	16.5	0			DoublingTime	8.924	9.407	11.92
T CELLS	0
	1	26.7	47.2	75.1	26.7	20.2	25.1	0	28.7	10.6	21.4	29.4	67.6	23.9	71.3	25.3	44.5	0	17.1	31.8	74.4	33.5	57.2	48.6	21.5	19.2	19.1	25.1
	4	32.2	69.1	69.1	32.2	27	44.1	0	31.8	9.5	15.8	24.5	73.2	29.2	48.6	48.7	38.4	8.8	70.2	48.7	62.2	99.2	145.8	34.5	17.4	22.6	19.6	63.8
	6	22.7	29.7	52.9	31.8	14.7	24.9	17.4	24	10.9	21.4	43.3	63.6	18	17.3	13.9	44.1	14.9	50.8	30.4	70	23.9	119.4	28.2	32.7	13.9	25.4	48.7
	8	50.6	43.6	63.5	34.3	14.9	16	14.5	29.6	16.9	19.1	27.9	35.6	16.3	24.6	24.5	50.8	16	43.5	33.6	34.9	22	94.1	31	29.4	26.7	14.5	29.4			Log-rank (Mantel-Cox) test
	11	24.6	27.2	19.2	59.2	11.3	17.2	8	18.8	16.7	14.5	35.3	1	23.3	36.1	31.8	23.1	8	14.3	23.3	47.1	28.7	117.7	33.5	25.1	27.9	51.2	12.6			Chi square	3.924
	15	49	47.6	47.7	80	18.9	78	19.2	35.5	76.5	68.1	95	41.9	67.2	10.1	57.6	20.2	22.7	24.3	68.8	38.3	67.2	134.8	42.3	4.4	33.2	44.1	57.8			df	1
	18	62.2	38.4	35.2	92.4	14.4	18.5	27.6	51.3	56	63.7	72.6	27.8	24.5	58.7	46.6	24.6	7.8	5.6	14.7	38.8	81.6	138	28.9	57.1	51.9	21.4	20.8			P value	0.0476
	20	48.5	15.1	62.8	35.1	15.4	33.1	27.9	66.3	84	36.4	85.7	65	50.8	68.4	44.4	32	7.9	8.4	10.3	33.9	94.2	158.1	22.5	30.6	31.2	31.2	26.6			P value summary	*
	22	57.1	23.9	49.6	122.5	20.1	32.7	43.7	45.9	85.1	73.2	170.6	66.7	40.3	71.5	64.8	36.1	12.8	0	0	61.2	102.6	245.1	13	70.8	37	34.2	28.5			Are the survival curves sig different?	Yes
	25	193.6	36.2	150.8	125.4	18.5	113.6	116	106.8	158.4	132.1	207.8	122.4	111.6	100.9	68.4	29.2	35.3	7.7	0	82.9	246.4	282	10.1	85.8	40	97.5	42.3
	27	122.8	45.6	147.9	121	22.9	154.7	169.1	123.9	127.3	225	261.6	113.4	102.8	96.2	63.9	60	118	0	0	96.8	136.9	368.5	9.5	68.8	48	109.3	32.8			Gehan-Breslow-Wilcoxon test
	29	197.5	66.3	148	320.3	109.8	79.8	123	154.8	221	221.1	254.9	161.8	181.7	159.4	82.5	100.7	329.3	0	0	83.1	153	308.3	6.1	241.9	89.4	106.7	88.9			Chi square	2.64
	32	139.6	51.6	231.4	296.5	94.6	186.6	201.8	289	234.2	333.2	529.3	200	149.7	329.1	137.9	66.3	213.2	0	0	112.9	258.8	309	6.9	282.4	277.1	117.6	179.6			df	1
	34	710.6	94.1	292	329.5	106.6	87.9	207	200.7	352.9	450.3	378.5	460.8	523.4	252	107.5	156.8	186.5	0	0	155.6	298.5	531.6	4.4	231.8	277.4	149.7	124.5			P value	0.1042
	39	704	123.9	287.6	486	91	167.7	386.1	332	388.1	359.1	620.6	752.6	236.3	556.6	191.9	139.4	79.8	0	0	192.2	422.3	566.6	0	178.5	861.4	154.8	134			P value summary	ns
	41	992.2	183.3	303.2	428.5	137.9	336.5	516.7	429.8	588	480.5	810.8	1008	154.4	705.6	308.3	171.1	157.7	0	0	206.5	627.3	712.7	0	159.2	979.8	185.9	142.7			Are the survival curves sig different?	No
	43	837.5	159.5	392.1	393.3	140.7	249.6	785.5	510.3	563.6	476.3	970		472.7	754.4	265.6	189.6	398.7	0	0	169.4	1669.2	935.2	0	272.3	835.5	232.7	200.9
	47	1015.8	213.2	570	612.6	232.2	455.1	931.7	719.1	1401.4	651.8	1129		314.4	810.3	390.4	225.3	220.3	0	0	293.6		1122.4	75.4	441.1	1733.9	247.5	215.6			Median survival
	50		230.7	576.4	919.6	218.1	441.1	1459.3	828.9		1155.6			269.8	835.8	854.5	313.4	681.5	0	0	544.9			144.9	364.5		495.5	740.1			shNTC	47
	53		186.4	1250	2078.3	471.3	2470.5		2025					2329.6	2433.6	2119.8	468.3	440.9	0	0	1274.9			274.4	1158.7		898.6	1562.5			shVHL	51
	56		708			512.8											855.5	457.1	0	0				747.9			1117.3				Ratio (and its reciprocal)	0.9216	1.085
	60					509.7											878.4	404	0	0				503.7							95% CI of ratio	0.3914 to 2.170	0.4608 to 2.555
	63					1091.7											1002.9	1611.7	0	0				724.7
	67																		0	0				1326.7							Hazard Ratio (Mantel-Haenszel)	A/C	C/A
	70																		0	0											Ratio (and its reciprocal)	2.693	0.3714
Survival analysis																															95% CI of ratio	1.011 to 7.175	0.1394 to 0.9896
	700mm3	33	55	50	47	60	50	41	46	43	47	39	38	50	40	49	54	61	70	70	50	41	41	62	51	37	51	49
	shNTC	1		1	1	1	1	1	1	1	1	1																			Hazard Ratio (logrank)	A/C	C/A
	NoACT												1	1	1	1															Ratio (and its reciprocal)	2.182	0.4583
	shVHL																1	1	0	0	1	1	1	1	1	1	1	1			95% CI of ratio	0.8818 to 5.400	0.1852 to 1.134
RAW data
Lin	Ear#	Cage	Date	Age (w)	Day (0=tumor injection)	Day (0=ACT)	Group	Auto-ID		Weight	Tumor (a)	Tumor (b)		Weight change (%)	Tumor vol (mm3)
557271	1	A	2022-04-05	8	0	-16	N	524678			0	0			0
557272	2	A	2022-04-05	8	0	-16	V	524679			0	0			0
557274	4	A	2022-04-05	8	0	-16	V	524681			0	0			0
557275	0	B	2022-04-05	8	0	-16	V	524682			0	0			0
557276	1	B	2022-04-05	8	0	-16	V	524683			0	0			0
557277	2	B	2022-04-05	8	0	-16	V	524684			0	0			0
557278	3	B	2022-04-05	8	0	-16	V	524685			0	0			0
557279	4	B	2022-04-05	8	0	-16	P	524686			0	0			0
557280	0	C	2022-04-05	8	0	-16	V	524687			0	0			0
557284	4	C	2022-04-05	8	0	-16	N	524691			0	0			0
557286	1	D	2022-04-05	8	0	-16	N	524693			0	0			0
557287	2	D	2022-04-05	8	0	-16	V	524694			0	0			0
557288	3	D	2022-04-05	8	0	-16	N	524695			0	0			0
557290	0	E	2022-04-05	8	0	-16	V	524697			0	0			0
557291	1	E	2022-04-05	8	0	-16	N	524698			0	0			0
557292	2	E	2022-04-05	8	0	-16	P	524699			0	0			0
557293	3	E	2022-04-05	8	0	-16	N	524700			0	0			0
557294	4	E	2022-04-05	8	0	-16	P	524701			0	0			0
557295	0	F	2022-04-05	8	0	-16	P	524702			0	0			0
557299	4	F	2022-04-05	8	0	-16	V	524706			0	0			0
557301	1	G	2022-04-05	8	0	-16	N	524697			0	0			0
557302	2	G	2022-04-05	8	0	-16	N	524698			0	0			0
557304	4	G	2022-04-05	8	0	-16	N	524700			0	0			0
557305	0	H	2022-04-05	8	0	-16	N	524701			0	0			0
557306	1	H	2022-04-05	8	0	-16	V	524702			0	0			0
557308	3	H	2022-04-05	8	0	-16	N	524704			0	0			0
557309	4	H	2022-04-05	8	0	-16	V	524705			0	0			0
557271	1	A	2022-04-15	9.42857	10	-6	N	524678	23.2	23.2	0	0		0	0
557272	2	A	2022-04-15	9.42857	10	-6	V	524679	22.4	22.4	3.4	2.3		0	8.993
557274	4	A	2022-04-15	9.42857	10	-6	V	524681	24.2	24.2	0	0		0	0
557275	0	B	2022-04-15	9.42857	10	-6	V	524682	20.7	20.7	4.9	3.2		0	25.088
557276	1	B	2022-04-15	9.42857	10	-6	V	524683	21.8	21.8	3.3	4.5		0	33.4125
557277	2	B	2022-04-15	9.42857	10	-6	V	524684	24.6	24.6	4.1	3.7		0	28.0645
557278	3	B	2022-04-15	9.42857	10	-6	V	524685	22.6	22.6	0	0		0	0
557279	4	B	2022-04-15	9.42857	10	-6	P	524686	23	23	4.4	2.1		0	9.702
557280	0	C	2022-04-15	9.42857	10	-6	V	524687	22.7	22.7	4.8	3.3		0	26.136
557284	4	C	2022-04-15	9.42857	10	-6	N	524691	23.3	23.3	3.8	3		0	17.1
557286	1	D	2022-04-15	9.42857	10	-6	N	524693	22.2	22.2	2.4	5.2		0	32.448
557287	2	D	2022-04-15	9.42857	10	-6	V	524694	23.7	23.7	4.2	3.8		0	30.324
557288	3	D	2022-04-15	9.42857	10	-6	N	524695	21.1	21.1	3.6	3.3		0	19.602
557290	0	E	2022-04-15	9.42857	10	-6	V	524697	24	24	0	0		0	0
557291	1	E	2022-04-15	9.42857	10	-6	N	524698	23.5	23.5	3	2.7		0	10.935
557292	2	E	2022-04-15	9.42857	10	-6	P	524699	27.3	27.3	2.9	2.5		0	9.0625
557293	3	E	2022-04-15	9.42857	10	-6	N	524700	23.2	23.2	2.8	2.2		0	6.776
557294	4	E	2022-04-15	9.42857	10	-6	P	524701	26.5	26.5	3.4	3.4		0	19.652
557295	0	F	2022-04-15	9.42857	10	-6	P	524702	23.9	23.9	0	0		0	0
557299	4	F	2022-04-15	9.42857	10	-6	V	524706	25.1	25.1	3.2	2.6		0	10.816
557301	1	G	2022-04-15	9.42857	10	-6	N	524697	22.9	22.9	0	0		0	0
557302	2	G	2022-04-15	9.42857	10	-6	N	524698	24.3	24.3	3.9	0		0	0
557304	4	G	2022-04-15	9.42857	10	-6	N	524700	23.6	23.6	0	0		0	0
557305	0	H	2022-04-15	9.42857	10	-6	N	524701	22.7	22.7	0	0		0	0
557306	1	H	2022-04-15	9.42857	10	-6	V	524702	22.4	22.4	2.9	1.6		0	3.712
557308	3	H	2022-04-15	9.42857	10	-6	N	524704	22.9	22.9	5.4	3.4		0	31.212
557309	4	H	2022-04-15	9.42857	10	-6	V	524705	22.1	22.1	0	0		0	0
557271	1	A	2022-04-18	9.85714	13	-3	N	524678	23.2	22.5	2.1	3.3		-3.01724	11.4345
557272	2	A	2022-04-18	9.85714	13	-3	V	524679	22.4	23.2	4.8	3.6		3.57143	31.104
557274	4	A	2022-04-18	9.85714	13	-3	V	524681	24.2	24.8	0	0		2.47934	0
557275	0	B	2022-04-18	9.85714	13	-3	V	524682	20.7	21.9	4.3	3.9		5.7971	32.7015
557276	1	B	2022-04-18	9.85714	13	-3	V	524683	21.8	22.4	5.4	5.2		2.75229	73.008
557277	2	B	2022-04-18	9.85714	13	-3	V	524684	24.6	24.8	4.3	3.7		0.813008	29.4335
557278	3	B	2022-04-18	9.85714	13	-3	V	524685	22.6	22.9	2.8	2.7		1.32743	10.206
557279	4	B	2022-04-18	9.85714	13	-3	P	524686	23	24.3	5	4.5		5.65217	50.625
557280	0	C	2022-04-18	9.85714	13	-3	V	524687	22.7	22.2	6.1	4		-2.20264	48.8
557284	4	C	2022-04-18	9.85714	13	-3	N	524691	23.3	23.4	5.2	4		0.429185	41.6
557286	1	D	2022-04-18	9.85714	13	-3	N	524693	22.2	22	5.8	2.7		-0.900901	21.141
557287	2	D	2022-04-18	9.85714	13	-3	V	524694	23.7	23.9	4	3.6		0.843882	25.92
557288	3	D	2022-04-18	9.85714	13	-3	N	524695	21.1	21.8	3.9	3.3		3.31754	21.2355
557290	0	E	2022-04-18	9.85714	13	-3	V	524697	24	23.6	0	0		-1.66667	0
557291	1	E	2022-04-18	9.85714	13	-3	N	524698	23.5	23.8	4	3.6		1.2766	25.92
557292	2	E	2022-04-18	9.85714	13	-3	P	524699	27.3	27.8	4.7	4		1.8315	37.6
557293	3	E	2022-04-18	9.85714	13	-3	N	524700	23.2	23.7	4.4	3.9		2.15517	33.462
557294	4	E	2022-04-18	9.85714	13	-3	P	524701	26.5	26.3	3.7	3.6		-0.754717	23.976
557295	0	F	2022-04-18	9.85714	13	-3	P	524702	23.9	24.1	2.6	2.3		0.83682	6.877
557299	4	F	2022-04-18	9.85714	13	-3	V	524706	25.1	25.2	3.5	3.1		0.398406	16.8175
557301	1	G	2022-04-18	9.85714	13	-3	N	524697	22.9	22.6	0	0		-1.31004	0
557302	2	G	2022-04-18	9.85714	13	-3	N	524698	24.3	23.9	3.9	3.5		-1.64609	23.8875
557304	4	G	2022-04-18	9.85714	13	-3	N	524700	23.6	23.9	3.3	2.9		1.27119	13.8765
557305	0	H	2022-04-18	9.85714	13	-3	N	524701	22.7	23.5	3.1	3.1		3.52423	14.8955
557306	1	H	2022-04-18	9.85714	13	-3	V	524702	22.4	22.9	4.3	2.8		2.23214	16.856
557308	3	H	2022-04-18	9.85714	13	-3	N	524704	22.9	23.1	4.7	3.7		0.873362	32.1715
557309	4	H	2022-04-18	9.85714	13	-3	V	524705	22.1	22.9	0	0		3.61991	0
557271	1	A	2022-04-20	10.1429	15	-1	N	524678	23.2	22.3	3.8	3.4		-3.87931	21.964
557272	2	A	2022-04-20	10.1429	15	-1	V	524679	22.4	21.2	4.8	3.7		-5.35714	32.856
557274	4	A	2022-04-20	10.1429	15	-1	V	524681	24.2	25.4	0	0		4.95868	0
557275	0	B	2022-04-20	10.1429	15	-1	V	524682	20.7	21.8	5.5	4		5.31401	44
557276	1	B	2022-04-20	10.1429	15	-1	V	524683	21.8	22.3	5.7	5.6		2.29358	89.376
557277	2	B	2022-04-20	10.1429	15	-1	V	524684	24.6	25.2	5.1	3.9		2.43902	38.7855
557278	3	B	2022-04-20	10.1429	15	-1	V	524685	22.6	23.3	3.1	2.9		3.09735	13.0355
557279	4	B	2022-04-20	10.1429	15	-1	P	524686	23	23.8	5.8	5.4		3.47826	84.564
557280	0	C	2022-04-20	10.1429	15	-1	V	524687	22.7	22.2	5.9	4.2		-2.20264	52.038
557284	4	C	2022-04-20	10.1429	15	-1	N	524691	23.3	23.4	6	3.9		0.429185	45.63
557286	1	D	2022-04-20	10.1429	15	-1	N	524693	22.2	22.4	5.9	3.4		0.900901	34.102
557287	2	D	2022-04-20	10.1429	15	-1	V	524694	23.7	22.8	4	3.8		-3.79747	28.88
557288	3	D	2022-04-20	10.1429	15	-1	N	524695	21.1	21.6	5.2	4.7		2.36967	57.434
557290	0	E	2022-04-20	10.1429	15	-1	V	524697	24	24.3	3.6	2.1		1.25	7.938
557291	1	E	2022-04-20	10.1429	15	-1	N	524698	23.5	24	3.7	3.3		2.12766	20.1465
557292	2	E	2022-04-20	10.1429	15	-1	P	524699	27.3	27.7	4.6	4.3		1.4652	42.527
557293	3	E	2022-04-20	10.1429	15	-1	N	524700	23.2	23.4	4.4	3.7		0.862069	30.118
557294	4	E	2022-04-20	10.1429	15	-1	P	524701	26.5	24.8	4.6	3.8		-6.41509	33.212
557295	0	F	2022-04-20	10.1429	15	-1	P	524702	23.9	23.6	4.2	4.1		-1.25523	35.301
557299	4	F	2022-04-20	10.1429	15	-1	V	524706	25.1	25.4	4.4	3.9		1.19522	33.462
557301	1	G	2022-04-20	10.1429	15	-1	N	524697	22.9	23.5	0	0		2.62009	0
557302	2	G	2022-04-20	10.1429	15	-1	N	524698	24.3	23.8	4.7	4.4		-2.05761	45.496
557304	4	G	2022-04-20	10.1429	15	-1	N	524700	23.6	24	3.4	3.1		1.69492	16.337
557305	0	H	2022-04-20	10.1429	15	-1	N	524701	22.7	23.4	4	3.3		3.0837	21.78
557306	1	H	2022-04-20	10.1429	15	-1	V	524702	22.4	22.8	4.2	2.8		1.78571	16.464
557308	3	H	2022-04-20	10.1429	15	-1	N	524704	22.9	22.9	5	3.4		0	28.9
557309	4	H	2022-04-20	10.1429	15	-1	V	524705	22.1	22.5	0	0		1.80995	0
557271	1	A	2022-04-22	10.4286	17	1	N	524678	23.2	22.8	3.9	3.7		-1.72414	26.6955
557272	2	A	2022-04-22	10.4286	17	1	V	524679	22.4	22.1	4.6	4.4		-1.33929	44.528
557274	4	A	2022-04-22	10.4286	17	1	V	524681	24.2	24.3	0	0		0.413223	0
557275	0	B	2022-04-22	10.4286	17	1	V	524682	20.7	22.2	3.8	3		7.24638	17.1
557276	1	B	2022-04-22	10.4286	17	1	V	524683	21.8	22.9	4.4	3.8		5.04587	31.768
557277	2	B	2022-04-22	10.4286	17	1	V	524684	24.6	25.1	5.3	5.3		2.03252	74.4385
557278	3	B	2022-04-22	10.4286	17	1	V	524685	22.6	22.8	4.4	3.9		0.884956	33.462
557279	4	B	2022-04-22	10.4286	17	1	P	524686	23	24.4	5.2	5.1		6.08696	67.626
557280	0	C	2022-04-22	10.4286	17	1	V	524687	22.7	21.9	6.8	4.1		-3.52423	57.154
557284	4	C	2022-04-22	10.4286	17	1	N	524691	23.3	23	6.2	3.9		-1.28755	47.151
557286	1	D	2022-04-22	10.4286	17	1	N	524693	22.2	23.1	6.8	4.7		4.05405	75.106
557287	2	D	2022-04-22	10.4286	17	1	V	524694	23.7	23.5	4.8	4.5		-0.843882	48.6
557288	3	D	2022-04-22	10.4286	17	1	N	524695	21.1	22.2	3.9	3.7		5.21327	26.6955
557290	0	E	2022-04-22	10.4286	17	1	V	524697	24	24.2	4.2	3.2		0.833333	21.504
557291	1	E	2022-04-22	10.4286	17	1	N	524698	23.5	24.7	3.5	3.4		5.10638	20.23
557292	2	E	2022-04-22	10.4286	17	1	P	524699	27.3	27.7	3.9	3.5		1.4652	23.8875
557293	3	E	2022-04-22	10.4286	17	1	N	524700	23.2	22.8	4.1	3.5		-1.72414	25.1125
557294	4	E	2022-04-22	10.4286	17	1	P	524701	26.5	26.2	5.7	5		-1.13208	71.25
557295	0	F	2022-04-22	10.4286	17	1	P	524702	23.9	24.4	3.9	3.6		2.09205	25.272
557299	4	F	2022-04-22	10.4286	17	1	V	524706	25.1	25.3	4	3.1		0.796813	19.22
557301	1	G	2022-04-22	10.4286	17	1	N	524697	22.9	23.3	0	0		1.74672	0
557302	2	G	2022-04-22	10.4286	17	1	N	524698	24.3	24.1	4.2	3.7		-0.823045	28.749
557304	4	G	2022-04-22	10.4286	17	1	N	524700	23.6	23.8	2.9	2.7		0.847458	10.5705
557305	0	H	2022-04-22	10.4286	17	1	N	524701	22.7	24.4	3.5	3.5		7.48899	21.4375
557306	1	H	2022-04-22	10.4286	17	1	V	524702	22.4	24.1	3.5	3.3		7.58929	19.0575
557308	3	H	2022-04-22	10.4286	17	1	N	524704	22.9	23.1	4.8	3.5		0.873362	29.4
557309	4	H	2022-04-22	10.4286	17	1	V	524705	22.1	22.8	4.1	3.5		3.16742	25.1125
557271	1	A	2022-04-25	10.8571	20	4	N	524678	23.2	23.2	4.7	3.7		0	32.1715
557272	2	A	2022-04-25	10.8571	20	4	V	524679	22.4	22.4	4.8	4		0	38.4
557274	4	A	2022-04-25	10.8571	20	4	V	524681	24.2	25.3	2.6	2.6		4.54545	8.788
557275	0	B	2022-04-25	10.8571	20	4	V	524682	20.7	21.8	5.4	5.1		5.31401	70.227
557276	1	B	2022-04-25	10.8571	20	4	V	524683	21.8	22.8	4.6	4.6		4.58716	48.668
557277	2	B	2022-04-25	10.8571	20	4	V	524684	24.6	25.3	5.4	4.8		2.84553	62.208
557278	3	B	2022-04-25	10.8571	20	4	V	524685	22.6	23.5	5.9	5.8		3.9823	99.238
557279	4	B	2022-04-25	10.8571	20	4	P	524686	23	24.5	6.1	4.9		6.52174	73.2305
557280	0	C	2022-04-25	10.8571	20	4	V	524687	22.7	22.6	6.9	6.5		-0.440529	145.763
557284	4	C	2022-04-25	10.8571	20	4	N	524691	23.3	24.7	6	4.8		6.00858	69.12
557286	1	D	2022-04-25	10.8571	20	4	N	524693	22.2	23.7	6	4.8		6.75676	69.12
557287	2	D	2022-04-25	10.8571	20	4	V	524694	23.7	23.8	4.1	4.1		0.421941	34.4605
557288	3	D	2022-04-25	10.8571	20	4	N	524695	21.1	22	4.7	3.7		4.2654	32.1715
557290	0	E	2022-04-25	10.8571	20	4	V	524697	24	25.6	3.4	3.2		6.66667	17.408
557291	1	E	2022-04-25	10.8571	20	4	N	524698	23.5	24.7	4.4	3.5		5.10638	26.95
557292	2	E	2022-04-25	10.8571	20	4	P	524699	27.3	27.7	4.5	3.6		1.4652	29.16
557293	3	E	2022-04-25	10.8571	20	4	N	524700	23.2	23	5	4.2		-0.862069	44.1
557294	4	E	2022-04-25	10.8571	20	4	P	524701	26.5	26.1	4.8	4.5		-1.50943	48.6
557295	0	F	2022-04-25	10.8571	20	4	P	524702	23.9	24.4	4.6	4.6		2.09205	48.668
557299	4	F	2022-04-25	10.8571	20	4	V	524706	25.1	25.9	4.7	3.1		3.18725	22.5835
557301	1	G	2022-04-25	10.8571	20	4	N	524697	22.9	24.3	0	0		6.11354	0
557302	2	G	2022-04-25	10.8571	20	4	N	524698	24.3	24.8	4.9	3.6		2.05761	31.752
557304	4	G	2022-04-25	10.8571	20	4	N	524700	23.6	24.3	2.8	2.6		2.9661	9.464
557305	0	H	2022-04-25	10.8571	20	4	N	524701	22.7	24.1	3.5	3		6.1674	15.75
557306	1	H	2022-04-25	10.8571	20	4	V	524702	22.4	23.9	3.6	3.3		6.69643	19.602
557308	3	H	2022-04-25	10.8571	20	4	N	524704	22.9	23.7	5.1	3.1		3.49345	24.5055
557309	4	H	2022-04-25	10.8571	20	4	V	524705	22.1	22.4	5.1	5		1.35747	63.75
557271	1	A	2022-04-27	11.1429	22	6	N	524678	23.2	23.2	3.7	3.5		0	22.6625
557272	2	A	2022-04-27	11.1429	22	6	V	524679	22.4	22	5	4.2		-1.78571	44.1
557274	4	A	2022-04-27	11.1429	22	6	V	524681	24.2	24	3.3	3		-0.826446	14.85
557275	0	B	2022-04-27	11.1429	22	6	V	524682	20.7	21.8	4.8	4.6		5.31401	50.784
557276	1	B	2022-04-27	11.1429	22	6	V	524683	21.8	22.6	4	3.9		3.66972	30.42
557277	2	B	2022-04-27	11.1429	22	6	V	524684	24.6	25.5	5.6	5		3.65854	70
557278	3	B	2022-04-27	11.1429	22	6	V	524685	22.6	23.3	3.9	3.5		3.09735	23.8875
557279	4	B	2022-04-27	11.1429	22	6	P	524686	23	24.8	5.3	4.9		7.82609	63.6265
557280	0	C	2022-04-27	11.1429	22	6	V	524687	22.7	22.8	7.1	5.8		0.440529	119.422
557284	4	C	2022-04-27	11.1429	22	6	N	524691	23.3	23.3	3.9	3.9		0	29.6595
557286	1	D	2022-04-27	11.1429	22	6	N	524693	22.2	23	6	4.2		3.6036	52.92
557287	2	D	2022-04-27	11.1429	22	6	V	524694	23.7	23.8	3.9	3.8		0.421941	28.158
557288	3	D	2022-04-27	11.1429	22	6	N	524695	21.1	21.2	4.4	3.8		0.473934	31.768
557290	0	E	2022-04-27	11.1429	22	6	V	524697	24	24.9	4.3	3.9		3.75	32.7015
557291	1	E	2022-04-27	11.1429	22	6	N	524698	23.5	25.1	3.5	2.9		6.80851	14.7175
557292	2	E	2022-04-27	11.1429	22	6	P	524699	27.3	29.1	3.3	3.3		6.59341	17.9685
557293	3	E	2022-04-27	11.1429	22	6	N	524700	23.2	23	4.3	3.4		-0.862069	24.854
557294	4	E	2022-04-27	11.1429	22	6	P	524701	26.5	26.3	3.6	3.1		-0.754717	17.298
557295	0	F	2022-04-27	11.1429	22	6	P	524702	23.9	24	3.3	2.9		0.41841	13.8765
557299	4	F	2022-04-27	11.1429	22	6	V	524706	25.1	25.8	3.8	2.7		2.78884	13.851
557301	1	G	2022-04-27	11.1429	22	6	N	524697	22.9	24.2	3.4	3.2		5.67686	17.408
557302	2	G	2022-04-27	11.1429	22	6	N	524698	24.3	24.8	5	3.1		2.05761	24.025
557304	4	G	2022-04-27	11.1429	22	6	N	524700	23.6	23.9	3	2.7		1.27119	10.935
557305	0	H	2022-04-27	11.1429	22	6	N	524701	22.7	24.8	3.5	3.5		9.2511	21.4375
557306	1	H	2022-04-27	11.1429	22	6	V	524702	22.4	24.3	4.4	3.4		8.48214	25.432
557308	3	H	2022-04-27	11.1429	22	6	N	524704	22.9	23.2	5.7	3.9		1.31004	43.3485
557309	4	H	2022-04-27	11.1429	22	6	V	524705	22.1	23	4.6	4.6		4.0724	48.668
557271	1	A	2022-04-28	11.2857	23	7	N	524678	23.2	22.9	4.8	4.1		-1.2931	40.344
557272	2	A	2022-04-28	11.2857	23	7	V	524679	22.4	22.4	2.8	2.4		0	8.064
557274	4	A	2022-04-28	11.2857	23	7	V	524681	24.2	24.3	4.5	3		0.413223	20.25
557275	0	B	2022-04-28	11.2857	23	7	V	524682	20.7	22.2	5.1	4.6		7.24638	53.958
557276	1	B	2022-04-28	11.2857	23	7	V	524683	21.8	23.2	3.3	3.1		6.42202	15.8565
557277	2	B	2022-04-28	11.2857	23	7	V	524684	24.6	25	4.3	3.8		1.62602	31.046
557278	3	B	2022-04-28	11.2857	23	7	V	524685	22.6	23.4	4.4	3.7		3.53982	30.118
557279	4	B	2022-04-28	11.2857	23	7	P	524686	23	25.1	5.1	4.3		9.13043	47.1495
557280	0	C	2022-04-28	11.2857	23	7	V	524687	22.7	22.9	6.1	5.7		0.881057	99.0945
557284	4	C	2022-04-28	11.2857	23	7	N	524691	23.3	23.8	4.4	3.5		2.14592	26.95
557286	1	D	2022-04-28	11.2857	23	7	N	524693	22.2	23.3	4.2	3.5		4.95495	25.725
557287	2	D	2022-04-28	11.2857	23	7	V	524694	23.7	24.4	4.2	3.3		2.95359	22.869
557288	3	D	2022-04-28	11.2857	23	7	N	524695	21.1	21.8	3.8	3		3.31754	17.1
557290	0	E	2022-04-28	11.2857	23	7	V	524697	24	25.1	4.3	3.1		4.58333	20.6615
557291	1	E	2022-04-28	11.2857	23	7	N	524698	23.5	24.7	3.8	3.3		5.10638	20.691
557292	2	E	2022-04-28	11.2857	23	7	P	524699	27.3	28.8	3.2	2.8		5.49451	12.544
557293	3	E	2022-04-28	11.2857	23	7	N	524700	23.2	22.8	3	2.7		-1.72414	10.935
557294	4	E	2022-04-28	11.2857	23	7	P	524701	26.5	26.3	4.2	3.8		-0.754717	30.324
557295	0	F	2022-04-28	11.2857	23	7	P	524702	23.9	23.8	3.8	3.7		-0.41841	26.011
557299	4	F	2022-04-28	11.2857	23	7	V	524706	25.1	25.2	4.5	3.9		0.398406	34.2225
557301	1	G	2022-04-28	11.2857	23	7	N	524697	22.9	23.8	3	2.9		3.93013	12.615
557302	2	G	2022-04-28	11.2857	23	7	N	524698	24.3	23.8	3.5	3.3		-2.05761	19.0575
557304	4	G	2022-04-28	11.2857	23	7	N	524700	23.6	24.6	3.3	2.7		4.23729	12.0285
557305	0	H	2022-04-28	11.2857	23	7	N	524701	22.7	24.7	3.5	3		8.81057	15.75
557306	1	H	2022-04-28	11.2857	23	7	V	524702	22.4	23.9	3.8	3		6.69643	17.1
557308	3	H	2022-04-28	11.2857	23	7	N	524704	22.9	23.6	4.4	3.5		3.05677	26.95
557309	4	H	2022-04-28	11.2857	23	7	V	524705	22.1	22.9	3.9	3		3.61991	17.55
557271	1	A	2022-04-29	11.4286	24	8	N	524678	23.2	22.7	5	4.5		-2.15517	50.625
557272	2	A	2022-04-29	11.4286	24	8	V	524679	22.4	22.6	4.8	4.6		0.892857	50.784
557274	4	A	2022-04-29	11.4286	24	8	V	524681	24.2	24.3	4.4	2.7		0.413223	16.038
557275	0	B	2022-04-29	11.4286	24	8	V	524682	20.7	22.4	4.7	4.3		8.21256	43.4515
557276	1	B	2022-04-29	11.4286	24	8	V	524683	21.8	23.1	4.2	4		5.9633	33.6
557277	2	B	2022-04-29	11.4286	24	8	V	524684	24.6	25.2	5.1	3.7		2.43902	34.9095
557278	3	B	2022-04-29	11.4286	24	8	V	524685	22.6	23	3.8	3.4		1.76991	21.964
557279	4	B	2022-04-29	11.4286	24	8	P	524686	23	25.2	5.2	3.7		9.56522	35.594
557280	0	C	2022-04-29	11.4286	24	8	V	524687	22.7	23.3	6	5.6		2.64317	94.08
557284	4	C	2022-04-29	11.4286	24	8	N	524691	23.3	23.8	4.5	4.4		2.14592	43.56
557286	1	D	2022-04-29	11.4286	24	8	N	524693	22.2	23.4	6	4.6		5.40541	63.48
557287	2	D	2022-04-29	11.4286	24	8	V	524694	23.7	23.4	4.3	3.8		-1.26582	31.046
557288	3	D	2022-04-29	11.4286	24	8	N	524695	21.1	21.7	5.6	3.5		2.8436	34.3
557290	0	E	2022-04-29	11.4286	24	8	V	524697	24	24.8	4.3	3.7		3.33333	29.4335
557291	1	E	2022-04-29	11.4286	24	8	N	524698	23.5	24.4	3.3	3		3.82979	14.85
557292	2	E	2022-04-29	11.4286	24	8	P	524699	27.3	28.1	3.4	3.1		2.9304	16.337
557293	3	E	2022-04-29	11.4286	24	8	N	524700	23.2	22.9	3.8	2.9		-1.2931	15.979
557294	4	E	2022-04-29	11.4286	24	8	P	524701	26.5	25.7	3.8	3.6		-3.01887	24.624
557295	0	F	2022-04-29	11.4286	24	8	P	524702	23.9	23.9	4.5	3.3		0	24.5025
557299	4	F	2022-04-29	11.4286	24	8	V	524706	25.1	25	3.9	3.7		-0.398406	26.6955
557301	1	G	2022-04-29	11.4286	24	8	N	524697	22.9	23.6	3.7	2.8		3.05677	14.504
557302	2	G	2022-04-29	11.4286	24	8	N	524698	24.3	23.3	4.1	3.8		-4.11523	29.602
557304	4	G	2022-04-29	11.4286	24	8	N	524700	23.6	24.2	3.3	3.2		2.54237	16.896
557305	0	H	2022-04-29	11.4286	24	8	N	524701	22.7	24.7	3.5	3.3		8.81057	19.0575
557306	1	H	2022-04-29	11.4286	24	8	V	524702	22.4	23.6	4.3	2.6		5.35714	14.534
557308	3	H	2022-04-29	11.4286	24	8	N	524704	22.9	22.8	4.3	3.6		-0.436681	27.864
557309	4	H	2022-04-29	11.4286	24	8	V	524705	22.1	22.5	4.3	3.7		1.80995	29.4335
557271	1	A	2022-05-02	11.8571	27	11	N	524678	23.2	22.8	3.8	3.6		-1.72414	24.624
557272	2	A	2022-05-02	11.8571	27	11	V	524679	22.4	23	4	3.4		2.67857	23.12
557274	4	A	2022-05-02	11.8571	27	11	V	524681	24.2	24.7	4	2		2.06612	8
557275	0	B	2022-05-02	11.8571	27	11	V	524682	20.7	22	3.4	2.9		6.28019	14.297
557276	1	B	2022-05-02	11.8571	27	11	V	524683	21.8	23	3.8	3.5		5.50459	23.275
557277	2	B	2022-05-02	11.8571	27	11	V	524684	24.6	25.7	5.1	4.3		4.47154	47.1495
557278	3	B	2022-05-02	11.8571	27	11	V	524685	22.6	22.9	4.2	3.7		1.32743	28.749
557279	4	B	2022-05-02	11.8571	27	11	P	524686	23	25.2	4.5	4		9.56522	36
557280	0	C	2022-05-02	11.8571	27	11	V	524687	22.7	23.9	7	5.8		5.28634	117.74
557284	4	C	2022-05-02	11.8571	27	11	N	524691	23.3	23.6	5	3.3		1.28755	27.225
557286	1	D	2022-05-02	11.8571	27	11	N	524693	22.2	24	4	3.1		8.10811	19.22
557287	2	D	2022-05-02	11.8571	27	11	V	524694	23.7	24	4.4	3.9		1.26582	33.462
557288	3	D	2022-05-02	11.8571	27	11	N	524695	21.1	21.9	5.6	4.6		3.79147	59.248
557290	0	E	2022-05-02	11.8571	27	11	V	524697	24	25.1	4.9	3.2		4.58333	25.088
557291	1	E	2022-05-02	11.8571	27	11	N	524698	23.5	24.9	3.1	2.7		5.95745	11.2995
557292	2	E	2022-05-02	11.8571	27	11	P	524699	27.3	29.2	3.8	3.5		6.95971	23.275
557293	3	E	2022-05-02	11.8571	27	11	N	524700	23.2	23	4.4	2.8		-0.862069	17.248
557294	4	E	2022-05-02	11.8571	27	11	P	524701	26.5	27	4.3	4.1		1.88679	36.1415
557295	0	F	2022-05-02	11.8571	27	11	P	524702	23.9	24	4.4	3.8		0.41841	31.768
557299	4	F	2022-05-02	11.8571	27	11	V	524706	25.1	24.8	4.3	3.6		-1.19522	27.864
557301	1	G	2022-05-02	11.8571	27	11	N	524697	22.9	24.4	4	2		6.55022	8
557302	2	G	2022-05-02	11.8571	27	11	N	524698	24.3	23.9	4.8	2.8		-1.64609	18.816
557304	4	G	2022-05-02	11.8571	27	11	N	524700	23.6	25.9	3.7	3		9.74576	16.65
557305	0	H	2022-05-02	11.8571	27	11	N	524701	22.7	25.6	3.7	2.8		12.7753	14.504
557306	1	H	2022-05-02	11.8571	27	11	V	524702	22.4	24.2	5.8	4.2		8.03571	51.156
557308	3	H	2022-05-02	11.8571	27	11	N	524704	22.9	24.1	6.1	3.4		5.24017	35.258
557309	4	H	2022-05-02	11.8571	27	11	V	524705	22.1	23.2	3	2.9		4.97738	12.615
557271	1	A	2022-05-04	12.1429	29	13	N	524678	23.2	23.3	4.2	3.8		0.431034	30.324
557272	2	A	2022-05-04	12.1429	29	13	V	524679	22.4	23.4	3.2	3		4.46429	14.4
557274	4	A	2022-05-04	12.1429	29	13	V	524681	24.2	25.1	0	0		3.71901	0
557275	0	B	2022-05-04	12.1429	29	13	V	524682	20.7	22.6	4.1	4		9.17874	32.8
557276	1	B	2022-05-04	12.1429	29	13	V	524683	21.8	23.4	3.3	3		7.33945	14.85
557277	2	B	2022-05-04	12.1429	29	13	V	524684	24.6	25	5.6	3.6		1.62602	36.288
557278	3	B	2022-05-04	12.1429	29	13	V	524685	22.6	23.1	4.3	3.3		2.21239	23.4135
557279	4	B	2022-05-04	12.1429	29	13	P	524686	23	25.4	0	0		10.4348	0
557280	0	C	2022-05-04	12.1429	29	13	V	524687	22.7	23.2	5.2	4.9		2.20264	62.426
557284	4	C	2022-05-04	12.1429	29	13	N	524691	23.3	24	4.6	4.1		3.00429	38.663
557286	1	D	2022-05-04	12.1429	29	13	N	524693	22.2	25	5.7	5.1		12.6126	74.1285
557287	2	D	2022-05-04	12.1429	29	13	V	524694	23.7	23.5	4.1	3.9		-0.843882	31.1805
557288	3	D	2022-05-04	12.1429	29	13	N	524695	21.1	23.5	6.2	3.4		11.3744	35.836
557290	0	E	2022-05-04	12.1429	29	13	V	524697	24	24.5	4.2	3.1		2.08333	20.181
557291	1	E	2022-05-04	12.1429	29	13	N	524698	23.5	25	0	0		6.38298	0
557292	2	E	2022-05-04	12.1429	29	13	P	524699	27.3	29	4.4	3.9		6.22711	33.462
557293	3	E	2022-05-04	12.1429	29	13	N	524700	23.2	23	0	0		-0.862069	0
557294	4	E	2022-05-04	12.1429	29	13	P	524701	26.5	26.5	4.9	4.7		0	54.1205
557295	0	F	2022-05-04	12.1429	29	13	P	524702	23.9	24.5	3.9	3.4		2.51046	22.542
557299	4	F	2022-05-04	12.1429	29	13	V	524706	25.1	25.5	4.5	3		1.59363	20.25
557301	1	G	2022-05-04	12.1429	29	13	N	524697	22.9	24.5	0	0		6.9869	0
557302	2	G	2022-05-04	12.1429	29	13	N	524698	24.3	24	4.7	3.5		-1.23457	28.7875
557304	4	G	2022-05-04	12.1429	29	13	N	524700	23.6	26.3	0	0		11.4407	0
557305	0	H	2022-05-04	12.1429	29	13	N	524701	22.7	25	0	0		10.1322	0
557306	1	H	2022-05-04	12.1429	29	13	V	524702	22.4	24.5	3.5	3.2		9.375	17.92
557308	3	H	2022-05-04	12.1429	29	13	N	524704	22.9	24.5	7.1	4.1		6.9869	59.6755
557309	4	H	2022-05-04	12.1429	29	13	V	524705	22.1	23	3	3		4.0724	13.5
557271	1	A	2022-05-06	12.4286	31	15	N	524678	23.2	23.7	5.3	4.3		2.15517	48.9985
557272	2	A	2022-05-06	12.4286	31	15	V	524679	22.4	23.3	3.5	3.4		4.01786	20.23
557274	4	A	2022-05-06	12.4286	31	15	V	524681	24.2	24.5	5.4	2.9		1.23967	22.707
557275	0	B	2022-05-06	12.4286	31	15	V	524682	20.7	22.6	4.2	3.4		9.17874	24.276
557276	1	B	2022-05-06	12.4286	31	15	V	524683	21.8	23.2	8.6	4		6.42202	68.8
557277	2	B	2022-05-06	12.4286	31	15	V	524684	24.6	26	5.3	3.8		5.69106	38.266
557278	3	B	2022-05-06	12.4286	31	15	V	524685	22.6	23	5.6	4.9		1.76991	67.228
557279	4	B	2022-05-06	12.4286	31	15	P	524686	23	25.6	5.8	3.8		11.3043	41.876
557280	0	C	2022-05-06	12.4286	31	15	V	524687	22.7	23.8	8.6	5.6		4.84581	134.848
557284	4	C	2022-05-06	12.4286	31	15	N	524691	23.3	24	5.4	4.2		3.00429	47.628
557286	1	D	2022-05-06	12.4286	31	15	N	524693	22.2	24.5	6.6	3.8		10.3604	47.652
557287	2	D	2022-05-06	12.4286	31	15	V	524694	23.7	24.6	4.8	4.2		3.79747	42.336
557288	3	D	2022-05-06	12.4286	31	15	N	524695	21.1	22.2	7.9	4.5		5.21327	79.9875
557290	0	E	2022-05-06	12.4286	31	15	V	524697	24	24.7	4.5	1.4		2.91667	4.41
557291	1	E	2022-05-06	12.4286	31	15	N	524698	23.5	25	4.2	3		6.38298	18.9
557292	2	E	2022-05-06	12.4286	31	15	P	524699	27.3	29	5.6	4.9		6.22711	67.228
557293	3	E	2022-05-06	12.4286	31	15	N	524700	23.2	23	6.5	4.9		-0.862069	78.0325
557294	4	E	2022-05-06	12.4286	31	15	P	524701	26.5	26.9	3	2.6		1.50943	10.14
557295	0	F	2022-05-06	12.4286	31	15	P	524702	23.9	24.7	5	4.8		3.34728	57.6
557299	4	F	2022-05-06	12.4286	31	15	V	524706	25.1	25.7	4.6	3.8		2.39044	33.212
557301	1	G	2022-05-06	12.4286	31	15	N	524697	22.9	24.3	4.9	2.8		6.11354	19.208
557302	2	G	2022-05-06	12.4286	31	15	N	524698	24.3	23.8	5.8	3.5		-2.05761	35.525
557304	4	G	2022-05-06	12.4286	31	15	N	524700	23.6	26.2	9.1	4.1		11.0169	76.4855
557305	0	H	2022-05-06	12.4286	31	15	N	524701	22.7	26	8.1	4.1		14.5374	68.0805
557306	1	H	2022-05-06	12.4286	31	15	V	524702	22.4	24.5	5.8	3.9		9.375	44.109
557308	3	H	2022-05-06	12.4286	31	15	N	524704	22.9	25	7.6	5		9.17031	95
557309	4	H	2022-05-06	12.4286	31	15	V	524705	22.1	24	8	3.8		8.59729	57.76
557271	1	A	2022-05-09	12.8571	34	18	N	524678	23.2	24	5.4	4.8		3.44828	62.208
557272	2	A	2022-05-09	12.8571	34	18	V	524679	22.4	23.2	3.8	3.6		3.57143	24.624
557274	4	A	2022-05-09	12.8571	34	18	V	524681	24.2	24.4	2.7	2.4		0.826446	7.776
557275	0	B	2022-05-09	12.8571	34	18	V	524682	20.7	22.7	2.8	2		9.66184	5.6
557276	1	B	2022-05-09	12.8571	34	18	V	524683	21.8	23.1	3.5	2.9		5.9633	14.7175
557277	2	B	2022-05-09	12.8571	34	18	V	524684	24.6	24.9	5.1	3.9		1.21951	38.7855
557278	3	B	2022-05-09	12.8571	34	18	V	524685	22.6	22.7	5.6	5.4		0.442478	81.648
557279	4	B	2022-05-09	12.8571	34	18	P	524686	23	25.3	5.1	3.3		10	27.7695
557280	0	C	2022-05-09	12.8571	34	18	V	524687	22.7	23.6	8.8	5.6		3.96476	137.984
557284	4	C	2022-05-09	12.8571	34	18	N	524691	23.3	23.9	4.8	4		2.57511	38.4
557286	1	D	2022-05-09	12.8571	34	18	N	524693	22.2	24	4.4	4		8.10811	35.2
557287	2	D	2022-05-09	12.8571	34	18	V	524694	23.7	23.9	4	3.8		0.843882	28.88
557288	3	D	2022-05-09	12.8571	34	18	N	524695	21.1	22.2	7.7	4.9		5.21327	92.4385
557290	0	E	2022-05-09	12.8571	34	18	V	524697	24	26.3	5.9	4.4		9.58333	57.112
557291	1	E	2022-05-09	12.8571	34	18	N	524698	23.5	25	3.2	3		6.38298	14.4
557292	2	E	2022-05-09	12.8571	34	18	P	524699	27.3	28.1	4	3.5		2.9304	24.5
557293	3	E	2022-05-09	12.8571	34	18	N	524700	23.2	22.8	4.4	2.9		-1.72414	18.502
557294	4	E	2022-05-09	12.8571	34	18	P	524701	26.5	24.2	5.8	4.5		-8.67925	58.725
557295	0	F	2022-05-09	12.8571	34	18	P	524702	23.9	25.2	4.6	4.5		5.43933	46.575
557299	4	F	2022-05-09	12.8571	34	18	V	524706	25.1	26.1	4.7	4.7		3.98406	51.9115
557301	1	G	2022-05-09	12.8571	34	18	N	524697	22.9	23.8	5.4	3.2		3.93013	27.648
557302	2	G	2022-05-09	12.8571	34	18	N	524698	24.3	24.2	6.1	4.1		-0.411523	51.2705
557304	4	G	2022-05-09	12.8571	34	18	N	524700	23.6	25.8	7	4		9.32203	56
557305	0	H	2022-05-09	12.8571	34	18	N	524701	22.7	25.2	9.3	3.7		11.0132	63.6585
557306	1	H	2022-05-09	12.8571	34	18	V	524702	22.4	24.9	3.7	3.4		11.1607	21.386
557308	3	H	2022-05-09	12.8571	34	18	N	524704	22.9	24.9	6.3	4.8		8.73362	72.576
557309	4	H	2022-05-09	12.8571	34	18	V	524705	22.1	23.1	3.6	3.4		4.52489	20.808
557271	1	A	2022-05-11	13.1429	36	20	N	524678	23.2	24.2	5.5	4.2		4.31034	48.51
557272	2	A	2022-05-11	13.1429	36	20	V	524679	22.4	23.6	4	4		5.35714	32
557274	4	A	2022-05-11	13.1429	36	20	V	524681	24.2	24.7	3	2.3		2.06612	7.935
557275	0	B	2022-05-11	13.1429	36	20	V	524682	20.7	22.7	2.7	2.5		9.66184	8.4375
557276	1	B	2022-05-11	13.1429	36	20	V	524683	21.8	23.3	3.3	2.5		6.88073	10.3125
557277	2	B	2022-05-11	13.1429	36	20	V	524684	24.6	25.2	4.7	3.8		2.43902	33.934
557278	3	B	2022-05-11	13.1429	36	20	V	524685	22.6	22.4	5.8	5.7		-0.884956	94.221
557279	4	B	2022-05-11	13.1429	36	20	P	524686	23	25.3	5.2	5		10	65
557280	0	C	2022-05-11	13.1429	36	20	V	524687	22.7	23.3	8.5	6.1		2.64317	158.142
557284	4	C	2022-05-11	13.1429	36	20	N	524691	23.3	24	3.6	2.9		3.00429	15.138
557286	1	D	2022-05-11	13.1429	36	20	N	524693	22.2	24.1	6.2	4.5		8.55856	62.775
557287	2	D	2022-05-11	13.1429	36	20	V	524694	23.7	24.2	4.4	3.2		2.1097	22.528
557288	3	D	2022-05-11	13.1429	36	20	N	524695	21.1	22.1	2.7	5.1		4.73934	35.1135
557290	0	E	2022-05-11	13.1429	36	20	V	524697	24	25.1	5.3	3.4		4.58333	30.634
557291	1	E	2022-05-11	13.1429	36	20	N	524698	23.5	24.9	3.2	3.1		5.95745	15.376
557292	2	E	2022-05-11	13.1429	36	20	P	524699	27.3	28.4	5.5	4.3		4.0293	50.8475
557293	3	E	2022-05-11	13.1429	36	20	N	524700	23.2	22.7	5.4	3.5		-2.15517	33.075
557294	4	E	2022-05-11	13.1429	36	20	P	524701	26.5	26.7	5.7	4.9		0.754717	68.4285
557295	0	F	2022-05-11	13.1429	36	20	P	524702	23.9	25	4.8	4.3		4.60251	44.376
557299	4	F	2022-05-11	13.1429	36	20	V	524706	25.1	25.8	4.1	3.9		2.78884	31.1805
557301	1	G	2022-05-11	13.1429	36	20	N	524697	22.9	23.9	9.7	2.4		4.36681	27.936
557302	2	G	2022-05-11	13.1429	36	20	N	524698	24.3	23.8	6	4.7		-2.05761	66.27
557304	4	G	2022-05-11	13.1429	36	20	N	524700	23.6	25.8	7	4.9		9.32203	84.035
557305	0	H	2022-05-11	13.1429	36	20	N	524701	22.7	25.5	2.8	5.1		12.3348	36.414
557306	1	H	2022-05-11	13.1429	36	20	V	524702	22.4	25	5.1	3.5		11.6071	31.2375
557308	3	H	2022-05-11	13.1429	36	20	N	524704	22.9	24.1	6.1	5.3		5.24017	85.6745
557309	4	H	2022-05-11	13.1429	36	20	V	524705	22.1	23.4	4.1	3.6		5.88235	26.568
557271	1	A	2022-05-13	13.4286	38	22	N	524678	23.2	23.6	5.4	4.6		1.72414	57.132
557272	2	A	2022-05-13	13.4286	38	22	V	524679	22.4	23.6	4.3	4.1		5.35714	36.1415
557274	4	A	2022-05-13	13.4286	38	22	V	524681	24.2	24.6	3.5	2.7		1.65289	12.7575
557275	0	B	2022-05-13	13.4286	38	22	V	524682	20.7	22.7	0	0		9.66184	0
557276	1	B	2022-05-13	13.4286	38	22	V	524683	21.8	23.2	0	0		6.42202	0
557277	2	B	2022-05-13	13.4286	38	22	V	524684	24.6	24.8	5.1	4.9		0.813008	61.2255
557278	3	B	2022-05-13	13.4286	38	22	V	524685	22.6	22.9	6.1	5.8		1.32743	102.602
557279	4	B	2022-05-13	13.4286	38	22	P	524686	23	25.3	6.3	4.6		10	66.654
557280	0	C	2022-05-13	13.4286	38	22	V	524687	22.7	23.8	9.2	7.3		4.84581	245.134
557284	4	C	2022-05-13	13.4286	38	22	N	524691	23.3	24.5	3.9	3.5		5.15021	23.8875
557286	1	D	2022-05-13	13.4286	38	22	N	524693	22.2	24	4.9	4.5		8.10811	49.6125
557287	2	D	2022-05-13	13.4286	38	22	V	524694	23.7	23.7	3.1	2.9		0	13.0355
557288	3	D	2022-05-13	13.4286	38	22	N	524695	21.1	22.7	8.4	5.4		7.58294	122.472
557290	0	E	2022-05-13	13.4286	38	22	V	524697	24	24.8	5.9	4.9		3.33333	70.8295
557291	1	E	2022-05-13	13.4286	38	22	N	524698	23.5	25.2	3.7	3.3		7.23404	20.1465
557292	2	E	2022-05-13	13.4286	38	22	P	524699	27.3	28.8	4.8	4.1		5.49451	40.344
557293	3	E	2022-05-13	13.4286	38	22	N	524700	23.2	23.5	4.3	3.9		1.2931	32.7015
557294	4	E	2022-05-13	13.4286	38	22	P	524701	26.5	27.4	5.5	5.1		3.39623	71.5275
557295	0	F	2022-05-13	13.4286	38	22	P	524702	23.9	24.8	5.4	4.9		3.76569	64.827
557299	4	F	2022-05-13	13.4286	38	22	V	524706	25.1	26.2	4.2	4.2		4.38247	37.044
557301	1	G	2022-05-13	13.4286	38	22	N	524697	22.9	23.3	9.7	3		1.74672	43.65
557302	2	G	2022-05-13	13.4286	38	22	N	524698	24.3	24	6.7	3.7		-1.23457	45.8615
557304	4	G	2022-05-13	13.4286	38	22	N	524700	23.6	25.1	9.2	4.3		6.35593	85.054
557305	0	H	2022-05-13	13.4286	38	22	N	524701	22.7	25.7	10.7	3.7		13.2159	73.2415
557306	1	H	2022-05-13	13.4286	38	22	V	524702	22.4	24.9	5	3.7		11.1607	34.225
557308	3	H	2022-05-13	13.4286	38	22	N	524704	22.9	24	7.6	6.7		4.80349	170.582
557309	4	H	2022-05-13	13.4286	38	22	V	524705	22.1	22.9	4.4	3.6		3.61991	28.512
557271	1	A	2022-05-16	13.8571	41	25	N	524678	23.2	23.7	7.9	7		2.15517	193.55
557272	2	A	2022-05-16	13.8571	41	25	V	524679	22.4	23.4	4.5	3.6		4.46429	29.16
557274	4	A	2022-05-16	13.8571	41	25	V	524681	24.2	25.2	6.9	3.2		4.13223	35.328
557275	0	B	2022-05-16	13.8571	41	25	V	524682	20.7	23.2	3.5	2.1		12.0773	7.7175
557276	1	B	2022-05-16	13.8571	41	25	V	524683	21.8	23.4	0	0		7.33945	0
557277	2	B	2022-05-16	13.8571	41	25	V	524684	24.6	25.9	5.9	5.3		5.28455	82.8655
557278	3	B	2022-05-16	13.8571	41	25	V	524685	22.6	24.1	8.1	7.8		6.63717	246.402
557279	4	B	2022-05-16	13.8571	41	25	P	524686	23	25.2	6.8	6		9.56522	122.4
557280	0	C	2022-05-16	13.8571	41	25	V	524687	22.7	23.7	10.3	7.4		4.40529	282.014
557284	4	C	2022-05-16	13.8571	41	25	N	524691	23.3	24.6	4.1	4.2		5.5794	36.162
557286	1	D	2022-05-16	13.8571	41	25	N	524693	22.2	24.7	7.6	6.3		11.2613	150.822
557287	2	D	2022-05-16	13.8571	41	25	V	524694	23.7	23	3	2.6		-2.95359	10.14
557288	3	D	2022-05-16	13.8571	41	25	N	524695	21.1	22.4	8.6	5.4		6.16114	125.388
557290	0	E	2022-05-16	13.8571	41	25	V	524697	24	25.4	6.6	5.1		5.83333	85.833
557291	1	E	2022-05-16	13.8571	41	25	N	524698	23.5	25.2	3.4	3.3		7.23404	18.513
557292	2	E	2022-05-16	13.8571	41	25	P	524699	27.3	28.7	6.2	6		5.12821	111.6
557293	3	E	2022-05-16	13.8571	41	25	N	524700	23.2	23.6	8.4	5.2		1.72414	113.568
557294	4	E	2022-05-16	13.8571	41	25	P	524701	26.5	27.1	5.8	5.9		2.26415	100.949
557295	0	F	2022-05-16	13.8571	41	25	P	524702	23.9	25.2	5.7	4.9		5.43933	68.4285
557299	4	F	2022-05-16	13.8571	41	25	V	524706	25.1	28	5	4		11.5538	40
557301	1	G	2022-05-16	13.8571	41	25	N	524697	22.9	24.3	10.5	4.7		6.11354	115.973
557302	2	G	2022-05-16	13.8571	41	25	N	524698	24.3	23.9	7.9	5.2		-1.64609	106.808
557304	4	G	2022-05-16	13.8571	41	25	N	524700	23.6	25.5	10.1	5.6		8.05085	158.368
557305	0	H	2022-05-16	13.8571	41	25	N	524701	22.7	25.9	11	4.9		14.0969	132.055
557306	1	H	2022-05-16	13.8571	41	25	V	524702	22.4	25.1	7.5	5.1		12.0536	97.5375
557308	3	H	2022-05-16	13.8571	41	25	N	524704	22.9	25	7.8	7.3		9.17031	207.831
557309	4	H	2022-05-16	13.8571	41	25	V	524705	22.1	23.4	4.8	4.2		5.88235	42.336
557271	1	A	2022-05-18	14.1429	43	27	N	524678	23.2	24.2	6.6	6.1		4.31034	122.793
557272	2	A	2022-05-18	14.1429	43	27	V	524679	22.4	23.7	5	4.9		5.80357	60.025
557274	4	A	2022-05-18	14.1429	43	27	V	524681	24.2	24.8	8.4	5.3		2.47934	117.978
557275	0	B	2022-05-18	14.1429	43	27	V	524682	20.7	23.8	0	0		14.9758	0
557276	1	B	2022-05-18	14.1429	43	27	V	524683	21.8	23.7	0	0		8.7156	0
557277	2	B	2022-05-18	14.1429	43	27	V	524684	24.6	25.7	6.4	5.5		4.47154	96.8
557278	3	B	2022-05-18	14.1429	43	27	V	524685	22.6	24.8	6.9	6.3		9.73451	136.93
557279	4	B	2022-05-18	14.1429	43	27	P	524686	23	25.5	7.5	5.5		10.8696	113.438
557280	0	C	2022-05-18	14.1429	43	27	V	524687	22.7	23.9	10.2	8.5		5.28634	368.475
557284	4	C	2022-05-18	14.1429	43	27	N	524691	23.3	24.8	6	3.9		6.43777	45.63
557286	1	D	2022-05-18	14.1429	43	27	N	524693	22.2	24.6	7	6.5		10.8108	147.875
557287	2	D	2022-05-18	14.1429	43	27	V	524694	23.7	24.4	2.8	2.6		2.95359	9.464
557288	3	D	2022-05-18	14.1429	43	27	N	524695	21.1	23	8	5.5		9.00474	121
557290	0	E	2022-05-18	14.1429	43	27	V	524697	24	25.5	5.5	5		6.25	68.75
557291	1	E	2022-05-18	14.1429	43	27	N	524698	23.5	25.4	4.2	3.3		8.08511	22.869
557292	2	E	2022-05-18	14.1429	43	27	P	524699	27.3	28.6	7.6	5.2		4.7619	102.752
557293	3	E	2022-05-18	14.1429	43	27	N	524700	23.2	24	9.2	5.8		3.44828	154.744
557294	4	E	2022-05-18	14.1429	43	27	P	524701	26.5	27.6	6.6	5.4		4.15094	96.228
557295	0	F	2022-05-18	14.1429	43	27	P	524702	23.9	25.3	6.6	4.4		5.85774	63.888
557299	4	F	2022-05-18	14.1429	43	27	V	524706	25.1	28.5	6	4		13.5458	48
557301	1	G	2022-05-18	14.1429	43	27	N	524697	22.9	24.1	13	5.1		5.24017	169.065
557302	2	G	2022-05-18	14.1429	43	27	N	524698	24.3	24.6	7.9	5.6		1.23457	123.872
557304	4	G	2022-05-18	14.1429	43	27	N	524700	23.6	24.8	10.6	4.9		5.08475	127.253
557305	0	H	2022-05-18	14.1429	43	27	N	524701	22.7	25.1	12.5	6		10.5727	225
557306	1	H	2022-05-18	14.1429	43	27	V	524702	22.4	25	6.5	5.8		11.6071	109.33
557308	3	H	2022-05-18	14.1429	43	27	N	524704	22.9	24.4	8.6	7.8		6.55022	261.612
557309	4	H	2022-05-18	14.1429	43	27	V	524705	22.1	23.4	4.1	4		5.88235	32.8
557271	1	A	2022-05-20	14.4286	45	29	N	524678	23.2	23.7	8.8	6.7		2.15517	197.516
557272	2	A	2022-05-20	14.4286	45	29	V	524679	22.4	23.1	6.2	5.7		3.125	100.719
557274	4	A	2022-05-20	14.4286	45	29	V	524681	24.2	24.5	8.7	8.7		1.23967	329.251
557275	0	B	2022-05-20	14.4286	45	29	V	524682	20.7	23.4	0	0		13.0435	0
557276	1	B	2022-05-20	14.4286	45	29	V	524683	21.8	23.4	0	0		7.33945	0
557277	2	B	2022-05-20	14.4286	45	29	V	524684	24.6	25.4	5.7	5.4		3.25203	83.106
557278	3	B	2022-05-20	14.4286	45	29	V	524685	22.6	23.6	8.5	6		4.42478	153
557279	4	B	2022-05-20	14.4286	45	29	P	524686	23	24.7	7	6.8		7.3913	161.84
557280	0	C	2022-05-20	14.4286	45	29	V	524687	22.7	24.2	10.4	7.7		6.60793	308.308
557284	4	C	2022-05-20	14.4286	45	29	N	524691	23.3	24.3	5.1	5.1		4.29185	66.3255
557286	1	D	2022-05-20	14.4286	45	29	N	524693	22.2	23.7	8.8	5.8		6.75676	148.016
557287	2	D	2022-05-20	14.4286	45	29	V	524694	23.7	24	2.3	2.3		1.26582	6.0835
557288	3	D	2022-05-20	14.4286	45	29	N	524695	21.1	22.9	9.3	8.3		8.53081	320.339
557290	0	E	2022-05-20	14.4286	45	29	V	524697	24	26	8.6	7.5		8.33333	241.875
557291	1	E	2022-05-20	14.4286	45	29	N	524698	23.5	25.3	7	5.6		7.65957	109.76
557292	2	E	2022-05-20	14.4286	45	29	P	524699	27.3	28	8.6	6.5		2.5641	181.675
557293	3	E	2022-05-20	14.4286	45	29	N	524700	23.2	23.56	5.9	5.2		1.55172	79.768
557294	4	E	2022-05-20	14.4286	45	29	P	524701	26.5	26.8	7.1	6.7		1.13208	159.359
557295	0	F	2022-05-20	14.4286	45	29	P	524702	23.9	25.4	7.8	4.6		6.27615	82.524
557299	4	F	2022-05-20	14.4286	45	29	V	524706	25.1	27.5	5.7	5.6		9.56175	89.376
557301	1	G	2022-05-20	14.4286	45	29	N	524697	22.9	24.1	13.3	4.3		5.24017	122.958
557302	2	G	2022-05-20	14.4286	45	29	N	524698	24.3	24	8.6	6		-1.23457	154.8
557304	4	G	2022-05-20	14.4286	45	29	N	524700	23.6	24.5	11.5	6.2		3.81356	221.03
557305	0	H	2022-05-20	14.4286	45	29	N	524701	22.7	25.3	14.1	5.6		11.4537	221.088
557306	1	H	2022-05-20	14.4286	45	29	V	524702	22.4	25.1	7.6	5.3		12.0536	106.742
557308	3	H	2022-05-20	14.4286	45	29	N	524704	22.9	24.3	8.6	7.7		6.11354	254.947
557309	4	H	2022-05-20	14.4286	45	29	V	524705	22.1	23.9	8.4	4.6		8.1448	88.872
557271	1	A	2022-05-23	14.8571	48	32	N	524678	23.2	23.8	8.3	5.8		2.58621	139.606
557272	2	A	2022-05-23	14.8571	48	32	V	524679	22.4	23.4	5.3	5		4.46429	66.25
557274	4	A	2022-05-23	14.8571	48	32	V	524681	24.2	23.9	8	7.3		-1.23967	213.16
557275	0	B	2022-05-23	14.8571	48	32	V	524682	20.7	23.5	0	0		13.5266	0
557276	1	B	2022-05-23	14.8571	48	32	V	524683	21.8	23.2	0	0		6.42202	0
557277	2	B	2022-05-23	14.8571	48	32	V	524684	24.6	24.8	7.2	5.6		0.813008	112.896
557278	3	B	2022-05-23	14.8571	48	32	V	524685	22.6	23.9	9.2	7.5		5.75221	258.75
557279	4	B	2022-05-23	14.8571	48	32	P	524686	23	24.9	8.4	6.9		8.26087	199.962
557280	0	C	2022-05-23	14.8571	48	32	V	524687	22.7	24	10.7	7.6		5.72687	309.016
557284	4	C	2022-05-23	14.8571	48	32	N	524691	23.3	24.6	5.1	4.5		5.5794	51.6375
557286	1	D	2022-05-23	14.8571	48	32	N	524693	22.2	23.1	11.3	6.4		4.05405	231.424
557287	2	D	2022-05-23	14.8571	48	32	V	524694	23.7	24	2.4	2.4		1.26582	6.912
557288	3	D	2022-05-23	14.8571	48	32	N	524695	21.1	22.7	10	7.7		7.58294	296.45
557290	0	E	2022-05-23	14.8571	48	32	V	524697	24	25.8	8.4	8.2		7.5	282.408
557291	1	E	2022-05-23	14.8571	48	32	N	524698	23.5	25	7	5.2		6.38298	94.64
557292	2	E	2022-05-23	14.8571	48	32	P	524699	27.3	28.5	8.6	5.9		4.3956	149.683
557293	3	E	2022-05-23	14.8571	48	32	N	524700	23.2	23.7	7.2	7.2		2.15517	186.624
557294	4	E	2022-05-23	14.8571	48	32	P	524701	26.5	26.9	8.9	8.6		1.50943	329.122
557295	0	F	2022-05-23	14.8571	48	32	P	524702	23.9	25	8.2	5.8		4.60251	137.924
557299	4	F	2022-05-23	14.8571	48	32	V	524706	25.1	27.2	10.4	7.3		8.36653	277.108
557301	1	G	2022-05-23	14.8571	48	32	N	524697	22.9	24.1	10.5	6.2		5.24017	201.81
557302	2	G	2022-05-23	14.8571	48	32	N	524698	24.3	24.6	9.5	7.8		1.23457	288.99
557304	4	G	2022-05-23	14.8571	48	32	N	524700	23.6	24.8	11.8	6.3		5.08475	234.171
557305	0	H	2022-05-23	14.8571	48	32	N	524701	22.7	25.4	15.3	6.6		11.8943	333.234
557306	1	H	2022-05-23	14.8571	48	32	V	524702	22.4	24.5	7.5	5.6		9.375	117.6
557308	3	H	2022-05-23	14.8571	48	32	N	524704	22.9	23.4	10.8	9.9		2.18341	529.254
557309	4	H	2022-05-23	14.8571	48	32	V	524705	22.1	23.3	8.5	6.5		5.42986	179.562
557271	1	A	2022-05-25	15.1429	50	34	N	524678	23.2	23.7	14.5	9.9		2.15517	710.573
557272	2	A	2022-05-25	15.1429	50	34	V	524679	22.4	24.2	7.2	6.6		8.03571	156.816
557274	4	A	2022-05-25	15.1429	50	34	V	524681	24.2	24.3	9.4	6.3		0.413223	186.543
557275	0	B	2022-05-25	15.1429	50	34	V	524682	20.7	23.8	0	0		14.9758	0
557276	1	B	2022-05-25	15.1429	50	34	V	524683	21.8	23.1	0	0		5.9633	0
557277	2	B	2022-05-25	15.1429	50	34	V	524684	24.6	25	7.6	6.4		1.62602	155.648
557278	3	B	2022-05-25	15.1429	50	34	V	524685	22.6	23.8	9.1	8.1		5.30973	298.525
557279	4	B	2022-05-25	15.1429	50	34	P	524686	23	24.6	11.9	8.8		6.95652	460.768
557280	0	C	2022-05-25	15.1429	50	34	V	524687	22.7	25	11.3	9.7		10.1322	531.608
557284	4	C	2022-05-25	15.1429	50	34	N	524691	23.3	25	6.7	5.3		7.29614	94.1015
557286	1	D	2022-05-25	15.1429	50	34	N	524693	22.2	23.8	9.6	7.8		7.20721	292.032
557287	2	D	2022-05-25	15.1429	50	34	V	524694	23.7	24.8	2.2	2		4.64135	4.4
557288	3	D	2022-05-25	15.1429	50	34	N	524695	21.1	23.7	9.8	8.2		12.3223	329.476
557290	0	E	2022-05-25	15.1429	50	34	V	524697	24	25.8	8.7	7.3		7.5	231.811
557291	1	E	2022-05-25	15.1429	50	34	N	524698	23.5	25.6	8.2	5.1		8.93617	106.641
557292	2	E	2022-05-25	15.1429	50	34	P	524699	27.3	29.6	10.9	9.8		8.42491	523.418
557293	3	E	2022-05-25	15.1429	50	34	N	524700	23.2	24.6	6.5	5.2		6.03448	87.88
557294	4	E	2022-05-25	15.1429	50	34	P	524701	26.5	27.8	8.5	7.7		4.90566	251.983
557295	0	F	2022-05-25	15.1429	50	34	P	524702	23.9	25.9	8.6	5		8.3682	107.5
557299	4	F	2022-05-25	15.1429	50	34	V	524706	25.1	27.1	12	6.8		7.96813	277.44
557301	1	G	2022-05-25	15.1429	50	34	N	524697	22.9	24.6	13.2	5.6		7.42358	206.976
557302	2	G	2022-05-25	15.1429	50	34	N	524698	24.3	24.6	9.8	6.4		1.23457	200.704
557304	4	G	2022-05-25	15.1429	50	34	N	524700	23.6	25	11.6	7.8		5.9322	352.872
557305	0	H	2022-05-25	15.1429	50	34	N	524701	22.7	25.6	16.9	7.3		12.7753	450.3
557306	1	H	2022-05-25	15.1429	50	34	V	524702	22.4	25	8.6	5.9		11.6071	149.683
557308	3	H	2022-05-25	15.1429	50	34	N	524704	22.9	24.5	10	8.7		6.9869	378.45
557309	4	H	2022-05-25	15.1429	50	34	V	524705	22.1	23.6	7.4	5.8		6.78733	124.468
557271	1	A	2022-05-27	15.4286	52	36	N	524678	23.2	23.8	13	9		2.58621	526.5
557272	2	A	2022-05-27	15.4286	52	36	V	524679	22.4	23.7	7.5	6.4		5.80357	153.6
557274	4	A	2022-05-27	15.4286	52	36	V	524681	24.2	24	8.4	8.3		-0.826446	289.338
557275	0	B	2022-05-27	15.4286	52	36	V	524682	20.7	23.8	0	0		14.9758	0
557276	1	B	2022-05-27	15.4286	52	36	V	524683	21.8	23	0	0		5.50459	0
557277	2	B	2022-05-27	15.4286	52	36	V	524684	24.6	25.1	7.8	5.4		2.03252	113.724
557278	3	B	2022-05-27	15.4286	52	36	V	524685	22.6	24	10.2	8.9		6.19469	403.971
557279	4	B	2022-05-27	15.4286	52	36	P	524686	23	25	11.5	9.8		8.69565	552.23
557280	0	C	2022-05-27	15.4286	52	36	V	524687	22.7	24	11.1	9.8		5.72687	533.022
557284	4	C	2022-05-27	15.4286	52	36	N	524691	23.3	24.6	6.1	5.6		5.5794	95.648
557286	1	D	2022-05-27	15.4286	52	36	N	524693	22.2	23.3	8.9	6.2		4.95495	171.058
557287	2	D	2022-05-27	15.4286	52	36	V	524694	23.7	25.2	0	0		6.32911	0
557288	3	D	2022-05-27	15.4286	52	36	N	524695	21.1	22.1	11.9	9.2		4.73934	503.608
557290	0	E	2022-05-27	15.4286	52	36	V	524697	24	25.4	9.5	6.5		5.83333	200.688
557291	1	E	2022-05-27	15.4286	52	36	N	524698	23.5	25	6	5		6.38298	75
557292	2	E	2022-05-27	15.4286	52	36	P	524699	27.3	29.4	10.2	9.6		7.69231	470.016
557293	3	E	2022-05-27	15.4286	52	36	N	524700	23.2	24	9.9	9.1		3.44828	409.909
557294	4	E	2022-05-27	15.4286	52	36	P	524701	26.5	27.4	9.6	9.2		3.39623	406.272
557295	0	F	2022-05-27	15.4286	52	36	P	524702	23.9	25.4	10.8	8.7		6.27615	408.726
557299	4	F	2022-05-27	15.4286	52	36	V	524706	25.1	27.1	12.3	8.9		7.96813	487.142
557301	1	G	2022-05-27	15.4286	52	36	N	524697	22.9	24.6	11.9	8		7.42358	380.8
557302	2	G	2022-05-27	15.4286	52	36	N	524698	24.3	25.2	9.4	8.1		3.7037	308.367
557304	4	G	2022-05-27	15.4286	52	36	N	524700	23.6	24.8	11.8	7.5		5.08475	331.875
557305	0	H	2022-05-27	15.4286	52	36	N	524701	22.7	25.5	15.6	8		12.3348	499.2
557306	1	H	2022-05-27	15.4286	52	36	V	524702	22.4	24.7	10.1	8.9		10.2679	400.011
557308	3	H	2022-05-27	15.4286	52	36	N	524704	22.9	23.9	12.3	10.2		4.36681	639.846
557309	4	H	2022-05-27	15.4286	52	36	V	524705	22.1	23.9	11	7		8.1448	269.5
557271	1	A	2022-05-30	15.8571	55	39	N	524678	23.2	24.4	15.6	9.5		5.17241	703.95
557272	2	A	2022-05-30	15.8571	55	39	V	524679	22.4	25.6	6.6	6.5		14.2857	139.425
557274	4	A	2022-05-30	15.8571	55	39	V	524681	24.2	24.4	9.5	4.1		0.826446	79.8475
557275	0	B	2022-05-30	15.8571	55	39	V	524682	20.7	24.3	0	0		17.3913	0
557276	1	B	2022-05-30	15.8571	55	39	V	524683	21.8	23.5	0	0		7.79817	0
557277	2	B	2022-05-30	15.8571	55	39	V	524684	24.6	25.7	10	6.2		4.47154	192.2
557278	3	B	2022-05-30	15.8571	55	39	V	524685	22.6	24.4	10.2	9.1		7.9646	422.331
557279	4	B	2022-05-30	15.8571	55	39	P	524686	23	25.1	12	11.2		9.13043	752.64
557280	0	C	2022-05-30	15.8571	55	39	V	524687	22.7	24.2	11.8	9.8		6.60793	566.636
557284	4	C	2022-05-30	15.8571	55	39	N	524691	23.3	25.9	8.5	5.4		11.1588	123.93
557286	1	D	2022-05-30	15.8571	55	39	N	524693	22.2	24	9.7	7.7		8.10811	287.556
557287	2	D	2022-05-30	15.8571	55	39	V	524694	23.7	25.2	0	0		6.32911	0
557288	3	D	2022-05-30	15.8571	55	39	N	524695	21.1	22.5	11	9.4		6.63507	485.98
557290	0	E	2022-05-30	15.8571	55	39	V	524697	24	26.2	7.5	6.9		9.16667	178.538
557291	1	E	2022-05-30	15.8571	55	39	N	524698	23.5	25.9	7.9	4.8		10.2128	91.008
557292	2	E	2022-05-30	15.8571	55	39	P	524699	27.3	28.6	8.4	7.5		4.7619	236.25
557293	3	E	2022-05-30	15.8571	55	39	N	524700	23.2	25	7.7	6.6		7.75862	167.706
557294	4	E	2022-05-30	15.8571	55	39	P	524701	26.5	28.1	10.7	10.2		6.03774	556.614
557295	0	F	2022-05-30	15.8571	55	39	P	524702	23.9	26.3	8.3	6.8		10.0418	191.896
557299	4	F	2022-05-30	15.8571	55	39	V	524706	25.1	28.6	14.5	10.9		13.9442	861.373
557301	1	G	2022-05-30	15.8571	55	39	N	524697	22.9	25.7	14.1	7.4		12.2271	386.058
557302	2	G	2022-05-30	15.8571	55	39	N	524698	24.3	25.7	11.2	7.7		5.76132	332.024
557304	4	G	2022-05-30	15.8571	55	39	N	524700	23.6	26	13.8	7.5		10.1695	388.125
557305	0	H	2022-05-30	15.8571	55	39	N	524701	22.7	25.9	16	6.7		14.0969	359.12
557306	1	H	2022-05-30	15.8571	55	39	V	524702	22.4	25.2	7.8	6.3		12.5	154.791
557308	3	H	2022-05-30	15.8571	55	39	N	524704	22.9	24.4	11.7	10.3		6.55022	620.627
557309	4	H	2022-05-30	15.8571	55	39	V	524705	22.1	23.9	7.7	5.9		8.1448	134.019
557271	1	A	2022-06-01	16.1429	57	41	N	524678	23.2	24.2	16.4	11		4.31034	992.2
557272	2	A	2022-06-01	16.1429	57	41	V	524679	22.4	24.7	7.4	6.8		10.2679	171.088
557274	4	A	2022-06-01	16.1429	57	41	V	524681	24.2	25	7.7	6.4		3.30579	157.696
557275	0	B	2022-06-01	16.1429	57	41	V	524682	20.7	23.8	0	0		14.9758	0
557276	1	B	2022-06-01	16.1429	57	41	V	524683	21.8	24.3	0	0		11.4679	0
557277	2	B	2022-06-01	16.1429	57	41	V	524684	24.6	26.2	9.2	6.7		6.50407	206.494
557278	3	B	2022-06-01	16.1429	57	41	V	524685	22.6	24.4	11.6	10.4		7.9646	627.328
557279	4	B	2022-06-01	16.1429	57	41	P	524686	23	25.4	14	12		10.4348	1008
557280	0	C	2022-06-01	16.1429	57	41	V	524687	22.7	25	13.7	10.2		10.1322	712.674
557284	4	C	2022-06-01	16.1429	57	41	N	524691	23.3	25.7	7.7	6.9		10.3004	183.299
557286	1	D	2022-06-01	16.1429	57	41	N	524693	22.2	24	10.5	7.6		8.10811	303.24
557287	2	D	2022-06-01	16.1429	57	41	V	524694	23.7	25.4	0	0		7.173	0
557288	3	D	2022-06-01	16.1429	57	41	N	524695	21.1	23	9.7	9.4		9.00474	428.546
557290	0	E	2022-06-01	16.1429	57	41	V	524697	24	25.5	9.8	5.7		6.25	159.201
557291	1	E	2022-06-01	16.1429	57	41	N	524698	23.5	26	8.2	5.8		10.6383	137.924
557292	2	E	2022-06-01	16.1429	57	41	P	524699	27.3	29.2	8.3	6.1		6.95971	154.422
557293	3	E	2022-06-01	16.1429	57	41	N	524700	23.2	25.1	9.1	8.6		8.18966	336.518
557294	4	E	2022-06-01	16.1429	57	41	P	524701	26.5	28.3	12.8	10.5		6.79245	705.6
557295	0	F	2022-06-01	16.1429	57	41	P	524702	23.9	25.9	10.4	7.7		8.3682	308.308
557299	4	F	2022-06-01	16.1429	57	41	V	524706	25.1	29	16.8	10.8		15.5378	979.776
557301	1	G	2022-06-01	16.1429	57	41	N	524697	22.9	25.5	15	8.3		11.3537	516.675
557302	2	G	2022-06-01	16.1429	57	41	N	524698	24.3	25.5	11.1	8.8		4.93827	429.792
557304	4	G	2022-06-01	16.1429	57	41	N	524700	23.6	25.8	15.9	8.6		9.32203	587.982
557305	0	H	2022-06-01	16.1429	57	41	N	524701	22.7	27	13.3	8.5		18.9427	480.463
557306	1	H	2022-06-01	16.1429	57	41	V	524702	22.4	26.1	8.8	6.5		16.5179	185.9
557308	3	H	2022-06-01	16.1429	57	41	N	524704	22.9	25.2	12.7	11.3		10.0437	810.832
557309	4	H	2022-06-01	16.1429	57	41	V	524705	22.1	24.2	8.2	5.9		9.50226	142.721
557271	1	A	2022-06-03	16.4286	59	43	N	524678	23.2	24.2	16.1	10.2		4.31034	837.522
557272	2	A	2022-06-03	16.4286	59	43	V	524679	22.4	24.5	8.2	6.8		9.375	189.584
557274	4	A	2022-06-03	16.4286	59	43	V	524681	24.2	25.1	11.3	8.4		3.71901	398.664
557275	0	B	2022-06-03	16.4286	59	43	V	524682	20.7	24.3	0	0		17.3913	0
557276	1	B	2022-06-03	16.4286	59	43	V	524683	21.8	24.4	0	0		11.9266	0
557277	2	B	2022-06-03	16.4286	59	43	V	524684	24.6	26.1	11.2	5.5		6.09756	169.4
557278	3	B	2022-06-03	16.4286	59	43	V	524685	22.6	24.9	16.1	14.4		10.177	1669.25
557279	4	B	2022-06-03	16.4286	59	43	P	524686	23
557280	0	C	2022-06-03	16.4286	59	43	V	524687	22.7	24.8	13.9	11.6		9.2511	935.192
557284	4	C	2022-06-03	16.4286	59	43	N	524691	23.3	25.9	6.9	6.8		11.1588	159.528
557286	1	D	2022-06-03	16.4286	59	43	N	524693	22.2	23.9	9.9	8.9		7.65766	392.09
557287	2	D	2022-06-03	16.4286	59	43	V	524694	23.7	24.8	0	0		4.64135	0
557288	3	D	2022-06-03	16.4286	59	43	N	524695	21.1	22.8	9.5	9.1		8.05687	393.348
557290	0	E	2022-06-03	16.4286	59	43	V	524697	24	25.4	8.3	8.1		5.83333	272.281
557291	1	E	2022-06-03	16.4286	59	43	N	524698	23.5	25.8	9.3	5.5		9.78723	140.663
557292	2	E	2022-06-03	16.4286	59	43	P	524699	27.3	28.8	10.7	9.4		5.49451	472.726
557293	3	E	2022-06-03	16.4286	59	43	N	524700	23.2	25.4	8	7.9		9.48276	249.64
557294	4	E	2022-06-03	16.4286	59	43	P	524701	26.5	28.7	12.7	10.9		8.30189	754.444
557295	0	F	2022-06-03	16.4286	59	43	P	524702	23.9	26.5	9.7	7.4		10.8787	265.586
557299	4	F	2022-06-03	16.4286	59	43	V	524706	25.1	29.1	17.4	9.8		15.9363	835.548
557301	1	G	2022-06-03	16.4286	59	43	N	524697	22.9	26	15.1	10.2		13.5371	785.502
557302	2	G	2022-06-03	16.4286	59	43	N	524698	24.3	26	11.8	9.3		6.99588	510.291
557304	4	G	2022-06-03	16.4286	59	43	N	524700	23.6	25.9	15.6	8.5		9.74576	563.55
557305	0	H	2022-06-03	16.4286	59	43	N	524701	22.7	26.6	12.3	8.8		17.1806	476.256
557306	1	H	2022-06-03	16.4286	59	43	V	524702	22.4	25.4	8.5	7.4		13.3929	232.73
557308	3	H	2022-06-03	16.4286	59	43	N	524704	22.9	25.1	13.7	11.9		9.60699	970.029
557309	4	H	2022-06-03	16.4286	59	43	V	524705	22.1	24.5	8.2	7		10.8597	200.9
557271	1	A	2022-06-07	17	63	47	N	524678	23.2	24.4	17.1	10.9		5.17241	1015.83
557272	2	A	2022-06-07	17	63	47	V	524679	22.4	25.5	7.8	7.6		13.8393	225.264
557274	4	A	2022-06-07	17	63	47	V	524681	24.2	26.3	11.1	6.3		8.67769	220.279
557275	0	B	2022-06-07	17	63	47	V	524682	20.7	24.1	0	0		16.4251	0
557276	1	B	2022-06-07	17	63	47	V	524683	21.8	24.5	0	0		12.3853	0
557277	2	B	2022-06-07	17	63	47	V	524684	24.6	26	12.7	6.8		5.69106	293.624
557278	3	B	2022-06-07	17	63	47	V	524685	22.6
557279	4	B	2022-06-07	17	63	47	P	524686	23
557280	0	C	2022-06-07	17	63	47	V	524687	22.7	24.8	14.6	12.4		9.2511	1122.45
557284	4	C	2022-06-07	17	63	47	N	524691	23.3	25.7	8	7.3		10.3004	213.16
557286	1	D	2022-06-07	17	63	47	N	524693	22.2	24	11.4	10		8.10811	570
557287	2	D	2022-06-07	17	63	47	V	524694	23.7	24.7	5.8	5.1		4.21941	75.429
557288	3	D	2022-06-07	17	63	47	N	524695	21.1	22.5	12.5	9.9		6.63507	612.562
557290	0	E	2022-06-07	17	63	47	V	524697	24	25.7	10.2	9.3		7.08333	441.099
557291	1	E	2022-06-07	17	63	47	N	524698	23.5	26.1	11.7	6.3		11.0638	232.186
557292	2	E	2022-06-07	17	63	47	P	524699	27.3	28.6	11.8	7.3		4.7619	314.411
557293	3	E	2022-06-07	17	63	47	N	524700	23.2	25.5	10.3	9.4		9.91379	455.054
557294	4	E	2022-06-07	17	63	47	P	524701	26.5	27.5	14.7	10.5		3.77358	810.337
557295	0	F	2022-06-07	17	63	47	P	524702	23.9	26.1	12.2	8		9.20502	390.4
557299	4	F	2022-06-07	17	63	47	V	524706	25.1	30.4	21.5	12.7		21.1155	1733.87
557301	1	G	2022-06-07	17	63	47	N	524697	22.9	26.3	15.4	11		14.8472	931.7
557302	2	G	2022-06-07	17	63	47	N	524698	24.3	27.3	12.8	10.6		12.3457	719.104
557304	4	G	2022-06-07	17	63	47	N	524700	23.6	26.2	14.3	14		11.0169	1401.4
557305	0	H	2022-06-07	17	63	47	N	524701	22.7	27	13.3	9.9		18.9427	651.767
557306	1	H	2022-06-07	17	63	47	V	524702	22.4	25.6	10.1	7		14.2857	247.45
557308	3	H	2022-06-07	17	63	47	N	524704	22.9	25.2	14	12.7		10.0437	1129.03
557309	4	H	2022-06-07	17	63	47	V	524705	22.1	24.5	8.8	7		10.8597	215.6
557271	1	A	2022-06-10	17.4286	66	50	N	524678	23.2		16.8	11.5			1110.9
557272	2	A	2022-06-10	17.4286	66	50	V	524679	22.4		9.1	8.3			313.45		A1
557274	4	A	2022-06-10	17.4286	66	50	V	524681	24.2		13.1	10.2			681.462		C0
557275	0	B	2022-06-10	17.4286	66	50	V	524682	20.7		0	0			0		F4
557276	1	B	2022-06-10	17.4286	66	50	V	524683	21.8		0	0			0		G1
557277	2	B	2022-06-10	17.4286	66	50	V	524684	24.6		12.6	9.3			544.887		G4
557278	3	B	2022-06-10	17.4286	66	50	V	524685	22.6								H0
557279	4	B	2022-06-10	17.4286	66	50	P	524686	23								H3
557280	0	C	2022-06-10	17.4286	66	50	V	524687	22.7		17	13.6			1572.16
557284	4	C	2022-06-10	17.4286	66	50	N	524691	23.3		8.9	7.2			230.688
557286	1	D	2022-06-10	17.4286	66	50	N	524693	22.2		11.3	10.1			576.356
557287	2	D	2022-06-10	17.4286	66	50	V	524694	23.7		7.3	6.3			144.868
557288	3	D	2022-06-10	17.4286	66	50	N	524695	21.1		15.2	11			919.6
557290	0	E	2022-06-10	17.4286	66	50	V	524697	24		9	9			364.5
557291	1	E	2022-06-10	17.4286	66	50	N	524698	23.5		8.9	7			218.05
557292	2	E	2022-06-10	17.4286	66	50	P	524699	27.3		9.1	7.7			269.769
557293	3	E	2022-06-10	17.4286	66	50	N	524700	23.2		10.2	9.3			441.099
557294	4	E	2022-06-10	17.4286	66	50	P	524701	26.5		14.6	10.7			835.777
557295	0	F	2022-06-10	17.4286	66	50	P	524702	23.9		12.7	11.6			854.456
557299	4	F	2022-06-10	17.4286	66	50	V	524706	25.1		25.3	18.2			4190.19
557301	1	G	2022-06-10	17.4286	66	50	N	524697	22.9		16.5	13.3			1459.34
557302	2	G	2022-06-10	17.4286	66	50	N	524698	24.3		13.7	11			828.85
557304	4	G	2022-06-10	17.4286	66	50	N	524700	23.6		18.8	16.5			2559.15
557305	0	H	2022-06-10	17.4286	66	50	N	524701	22.7		18.1	11.3			1155.59
557306	1	H	2022-06-10	17.4286	66	50	V	524702	22.4		13.4	8.6			495.532
557308	3	H	2022-06-10	17.4286	66	50	N	524704	22.9		16.1	13.2			1402.63
557309	4	H	2022-06-10	17.4286	66	50	V	524705	22.1		16.4	9.5			740.05
557271	1	A	2022-06-13	17.8571	69	53	N	524678	23.2
557272	2	A	2022-06-13	17.8571	69	53	V	524679	22.4	24.6	10.6	9.4		9.82143	468.308
557274	4	A	2022-06-13	17.8571	69	53	V	524681	24.2	25.3	12.8	8.3		4.54545	440.896
557275	0	B	2022-06-13	17.8571	69	53	V	524682	20.7	23.6	0	0		14.0097	0
557276	1	B	2022-06-13	17.8571	69	53	V	524683	21.8	25	0	0		14.6789	0
557277	2	B	2022-06-13	17.8571	69	53	V	524684	24.6	27.1	14.2	13.4		10.1626	1274.88
557278	3	B	2022-06-13	17.8571	69	53	V	524685	22.6
557279	4	B	2022-06-13	17.8571	69	53	P	524686	23
557280	0	C	2022-06-13	17.8571	69	53	V	524687	22.7
557284	4	C	2022-06-13	17.8571	69	53	N	524691	23.3	26.3	9.1	6.4		12.8755	186.368
557286	1	D	2022-06-13	17.8571	69	53	N	524693	22.2	24.5	16	12.5		10.3604	1250
557287	2	D	2022-06-13	17.8571	69	53	V	524694	23.7	26	9.5	7.6		9.70464	274.36
557288	3	D	2022-06-13	17.8571	69	53	N	524695	21.1	22	19.5	14.6		4.2654	2078.31
557290	0	E	2022-06-13	17.8571	69	53	V	524697	24	27	13.3	13.2		12.5	1158.7
557291	1	E	2022-06-13	17.8571	69	53	N	524698	23.5	27.4	11.9	8.9		16.5957	471.3
557292	2	E	2022-06-13	17.8571	69	53	P	524699	27.3	30.4	18.2	16		11.3553	2329.6
557293	3	E	2022-06-13	17.8571	69	53	N	524700	23.2	26.7	17.3	16.9		15.0862	2470.53
557294	4	E	2022-06-13	17.8571	69	53	P	524701	26.5	29.3	20	15.6		10.566	2433.6
557295	0	F	2022-06-13	17.8571	69	53	P	524702	23.9	26.4	17.2	15.7		10.4603	2119.81
557299	4	F	2022-06-13	17.8571	69	53	V	524706	25.1
557301	1	G	2022-06-13	17.8571	69	53	N	524697	22.9
557302	2	G	2022-06-13	17.8571	69	53	N	524698	24.3	27	18	15		11.1111	2025
557304	4	G	2022-06-13	17.8571	69	53	N	524700	23.6
557305	0	H	2022-06-13	17.8571	69	53	N	524701	22.7
557306	1	H	2022-06-13	17.8571	69	53	V	524702	22.4	26.6	19.5	9.6		18.75	898.56
557308	3	H	2022-06-13	17.8571	69	53	N	524704	22.9
557309	4	H	2022-06-13	17.8571	69	53	V	524705	22.1	25.6	20	12.5		15.8371	1562.5
557271	1	A	2022-06-16	18.2857	72	56	N	524678	23.2
557272	2	A	2022-06-16	18.2857	72	56	V	524679	22.4		13.4	11.3			855.523
557274	4	A	2022-06-16	18.2857	72	56	V	524681	24.2		10.8	9.2			457.056
557275	0	B	2022-06-16	18.2857	72	56	V	524682	20.7		0	0			0
557276	1	B	2022-06-16	18.2857	72	56	V	524683	21.8		0	0			0
557277	2	B	2022-06-16	18.2857	72	56	V	524684	24.6		15	14.1			1491.08
557278	3	B	2022-06-16	18.2857	72	56	V	524685	22.6
557279	4	B	2022-06-16	18.2857	72	56	P	524686	23
557280	0	C	2022-06-16	18.2857	72	56	V	524687	22.7
557284	4	C	2022-06-16	18.2857	72	56	N	524691	23.3		12.6	10.6			707.868
557286	1	D	2022-06-16	18.2857	72	56	N	524693	22.2		16	13			1352
557287	2	D	2022-06-16	18.2857	72	56	V	524694	23.7		14.1	10.3			747.935
557288	3	D	2022-06-16	18.2857	72	56	N	524695	21.1
557290	0	E	2022-06-16	18.2857	72	56	V	524697	24		15.9	15.8			1984.64
557291	1	E	2022-06-16	18.2857	72	56	N	524698	23.5		10.9	9.7			512.79
557292	2	E	2022-06-16	18.2857	72	56	P	524699	27.3
557293	3	E	2022-06-16	18.2857	72	56	N	524700	23.2
557294	4	E	2022-06-16	18.2857	72	56	P	524701	26.5
557295	0	F	2022-06-16	18.2857	72	56	P	524702	23.9
557299	4	F	2022-06-16	18.2857	72	56	V	524706	25.1
557301	1	G	2022-06-16	18.2857	72	56	N	524697	22.9
557302	2	G	2022-06-16	18.2857	72	56	N	524698	24.3
557304	4	G	2022-06-16	18.2857	72	56	N	524700	23.6
557305	0	H	2022-06-16	18.2857	72	56	N	524701	22.7
557306	1	H	2022-06-16	18.2857	72	56	V	524702	22.4		17.5	11.3			1117.29
557308	3	H	2022-06-16	18.2857	72	56	N	524704	22.9
557309	4	H	2022-06-16	18.2857	72	56	V	524705	22.1
557271	1	A	2022-06-20	18.8571	76	60	N	524678	23.2
557272	2	A	2022-06-20	18.8571	76	60	V	524679	22.4		12.2	12			878.4
557274	4	A	2022-06-20	18.8571	76	60	V	524681	24.2		10.2	8.9			403.971
557275	0	B	2022-06-20	18.8571	76	60	V	524682	20.7		0	0			0
557276	1	B	2022-06-20	18.8571	76	60	V	524683	21.8		0	0			0
557277	2	B	2022-06-20	18.8571	76	60	V	524684	24.6
557278	3	B	2022-06-20	18.8571	76	60	V	524685	22.6
557279	4	B	2022-06-20	18.8571	76	60	P	524686	23
557280	0	C	2022-06-20	18.8571	76	60	V	524687	22.7
557284	4	C	2022-06-20	18.8571	76	60	N	524691	23.3		10.8	7.3			287.766
557286	1	D	2022-06-20	18.8571	76	60	N	524693	22.2
557287	2	D	2022-06-20	18.8571	76	60	V	524694	23.7		11.4	9.4			503.652
557288	3	D	2022-06-20	18.8571	76	60	N	524695	21.1
557290	0	E	2022-06-20	18.8571	76	60	V	524697	24
557291	1	E	2022-06-20	18.8571	76	60	N	524698	23.5		10.4	9.9			509.652
557292	2	E	2022-06-20	18.8571	76	60	P	524699	27.3
557293	3	E	2022-06-20	18.8571	76	60	N	524700	23.2
557294	4	E	2022-06-20	18.8571	76	60	P	524701	26.5
557295	0	F	2022-06-20	18.8571	76	60	P	524702	23.9
557299	4	F	2022-06-20	18.8571	76	60	V	524706	25.1
557301	1	G	2022-06-20	18.8571	76	60	N	524697	22.9
557302	2	G	2022-06-20	18.8571	76	60	N	524698	24.3
557304	4	G	2022-06-20	18.8571	76	60	N	524700	23.6
557305	0	H	2022-06-20	18.8571	76	60	N	524701	22.7
557306	1	H	2022-06-20	18.8571	76	60	V	524702	22.4
557308	3	H	2022-06-20	18.8571	76	60	N	524704	22.9
557309	4	H	2022-06-20	18.8571	76	60	V	524705	22.1
557271	1	A	2022-06-23	19.2857	79	63	N	524678	23.2
557272	2	A	2022-06-23	19.2857	79	63	V	524679	22.4		13.7	12.1			1002.91
557274	4	A	2022-06-23	19.2857	79	63	V	524681	24.2		18.5	13.2			1611.72
557275	0	B	2022-06-23	19.2857	79	63	V	524682	20.7		0	0			0
557276	1	B	2022-06-23	19.2857	79	63	V	524683	21.8		0	0			0
557277	2	B	2022-06-23	19.2857	79	63	V	524684	24.6
557278	3	B	2022-06-23	19.2857	79	63	V	524685	22.6
557279	4	B	2022-06-23	19.2857	79	63	P	524686	23
557280	0	C	2022-06-23	19.2857	79	63	V	524687	22.7
557284	4	C	2022-06-23	19.2857	79	63	N	524691	23.3		10.5	8			336
557286	1	D	2022-06-23	19.2857	79	63	N	524693	22.2
557287	2	D	2022-06-23	19.2857	79	63	V	524694	23.7		12.2	10.9			724.741
557288	3	D	2022-06-23	19.2857	79	63	N	524695	21.1
557290	0	E	2022-06-23	19.2857	79	63	V	524697	24
557291	1	E	2022-06-23	19.2857	79	63	N	524698	23.5		14.2	12.4			1091.7
557292	2	E	2022-06-23	19.2857	79	63	P	524699	27.3
557293	3	E	2022-06-23	19.2857	79	63	N	524700	23.2
557294	4	E	2022-06-23	19.2857	79	63	P	524701	26.5
557295	0	F	2022-06-23	19.2857	79	63	P	524702	23.9
557299	4	F	2022-06-23	19.2857	79	63	V	524706	25.1
557301	1	G	2022-06-23	19.2857	79	63	N	524697	22.9
557302	2	G	2022-06-23	19.2857	79	63	N	524698	24.3
557304	4	G	2022-06-23	19.2857	79	63	N	524700	23.6
557305	0	H	2022-06-23	19.2857	79	63	N	524701	22.7
557306	1	H	2022-06-23	19.2857	79	63	V	524702	22.4
557308	3	H	2022-06-23	19.2857	79	63	N	524704	22.9
557309	4	H	2022-06-23	19.2857	79	63	V	524705	22.1
557271	1	A	2022-06-27	19.8571	83	67	N	524678	23.2
557272	2	A	2022-06-27	19.8571	83	67	V	524679	22.4
557274	4	A	2022-06-27	19.8571	83	67	V	524681	24.2
557275	0	B	2022-06-27	19.8571	83	67	V	524682	20.7		0	0			0
557276	1	B	2022-06-27	19.8571	83	67	V	524683	21.8		0	0			0
557277	2	B	2022-06-27	19.8571	83	67	V	524684	24.6
557278	3	B	2022-06-27	19.8571	83	67	V	524685	22.6
557279	4	B	2022-06-27	19.8571	83	67	P	524686	23
557280	0	C	2022-06-27	19.8571	83	67	V	524687	22.7
557284	4	C	2022-06-27	19.8571	83	67	N	524691	23.3		11.5	8.6			425.27
557286	1	D	2022-06-27	19.8571	83	67	N	524693	22.2
557287	2	D	2022-06-27	19.8571	83	67	V	524694	23.7		15	13.3			1326.68
557288	3	D	2022-06-27	19.8571	83	67	N	524695	21.1
557290	0	E	2022-06-27	19.8571	83	67	V	524697	24
557291	1	E	2022-06-27	19.8571	83	67	N	524698	23.5
557292	2	E	2022-06-27	19.8571	83	67	P	524699	27.3
557293	3	E	2022-06-27	19.8571	83	67	N	524700	23.2
557294	4	E	2022-06-27	19.8571	83	67	P	524701	26.5
557295	0	F	2022-06-27	19.8571	83	67	P	524702	23.9
557299	4	F	2022-06-27	19.8571	83	67	V	524706	25.1
557301	1	G	2022-06-27	19.8571	83	67	N	524697	22.9
557302	2	G	2022-06-27	19.8571	83	67	N	524698	24.3
557304	4	G	2022-06-27	19.8571	83	67	N	524700	23.6
557305	0	H	2022-06-27	19.8571	83	67	N	524701	22.7
557306	1	H	2022-06-27	19.8571	83	67	V	524702	22.4
557308	3	H	2022-06-27	19.8571	83	67	N	524704	22.9
557309	4	H	2022-06-27	19.8571	83	67	V	524705	22.1
557271	1	A	2022-06-30	20.2857	86	70	N	524678	23.2
557272	2	A	2022-06-30	20.2857	86	70	V	524679	22.4
557274	4	A	2022-06-30	20.2857	86	70	V	524681	24.2
557275	0	B	2022-06-30	20.2857	86	70	V	524682	20.7		0	0			0
557276	1	B	2022-06-30	20.2857	86	70	V	524683	21.8		0	0			0
557277	2	B	2022-06-30	20.2857	86	70	V	524684	24.6
557278	3	B	2022-06-30	20.2857	86	70	V	524685	22.6
557279	4	B	2022-06-30	20.2857	86	70	P	524686	23
557280	0	C	2022-06-30	20.2857	86	70	V	524687	22.7
557284	4	C	2022-06-30	20.2857	86	70	N	524691	23.3		11.9	8.7			450.355
557286	1	D	2022-06-30	20.2857	86	70	N	524693	22.2
557287	2	D	2022-06-30	20.2857	86	70	V	524694	23.7
557288	3	D	2022-06-30	20.2857	86	70	N	524695	21.1
557290	0	E	2022-06-30	20.2857	86	70	V	524697	24
557291	1	E	2022-06-30	20.2857	86	70	N	524698	23.5
557292	2	E	2022-06-30	20.2857	86	70	P	524699	27.3
557293	3	E	2022-06-30	20.2857	86	70	N	524700	23.2
557294	4	E	2022-06-30	20.2857	86	70	P	524701	26.5
557295	0	F	2022-06-30	20.2857	86	70	P	524702	23.9
557299	4	F	2022-06-30	20.2857	86	70	V	524706	25.1
557301	1	G	2022-06-30	20.2857	86	70	N	524697	22.9
557302	2	G	2022-06-30	20.2857	86	70	N	524698	24.3
557304	4	G	2022-06-30	20.2857	86	70	N	524700	23.6
557305	0	H	2022-06-30	20.2857	86	70	N	524701	22.7
557306	1	H	2022-06-30	20.2857	86	70	V	524702	22.4
557308	3	H	2022-06-30	20.2857	86	70	N	524704	22.9
557309	4	H	2022-06-30	20.2857	86	70	V	524705	22.1
