# Supplementary material for: Oxygen levels at the time of activation determine T cell persistence and immunotherapeutic efficacy
Source: eLife journal article supplement (doi:10.7554/elife.84280), 2023-05-11
Supplement: fig3-figsupp1-data1 [file Figure 3 - figure supplement 1 - Source data 1.xlsx]

## Sheet: Fig 3 - Fig S1B
	shNCT::RQR8		shCD5::RQR8		shNTC::HER2-CAR::RQR8		shCD5::HER2-CAR::RQR8			Holm-Šídák's multiple comparisons test	Mean Diff.	Below threshold?	Summary	Adjusted P Value
	RQR8-	RQR8+	RQR8-	RQR8+	RQR8-	RQR8+	RQR8-	RQR8+		shNTC RQR8 - vs. shNTC RQR8+	-0.1223	No	ns	0.7899
	731000	792000								shNTC RQR8 - vs. shVHL RQR8-	0.03756	No	ns	0.9959
	736000	846000								shNTC RQR8 - vs. shVHL RQR8+	0.2908	Yes	*	0.0173
	597000	677000								shNTC RQR8 - vs. shNTC:HER2 RQR8 -	-0.007425	No	ns	0.9959
			761000	507000						shNTC RQR8 - vs. shNTC:HER2 RQR8 +	-0.06009	No	ns	0.9935
			613000	481000						shNTC RQR8 - vs. shVHL:HER2 RQR8 -	0.03074	No	ns	0.9959
			605000	466000						shNTC RQR8 - vs. shVHL:HER2 RQR8 +	0.3276	Yes	**	0.0068
					816000	789000				shNTC RQR8+ vs. shVHL RQR8-	0.1599	No	ns	0.4744
					779000	830000				shNTC RQR8+ vs. shVHL RQR8+	0.4131	Yes	***	0.0007
					506000	581000				shNTC RQR8+ vs. shNTC:HER2 RQR8 -	0.1149	No	ns	0.8278
							748000	407000		shNTC RQR8+ vs. shNTC:HER2 RQR8 +	0.06222	No	ns	0.9935
							741000	546000		shNTC RQR8+ vs. shVHL:HER2 RQR8 -	0.153	No	ns	0.5176
							524000	429000		shNTC RQR8+ vs. shVHL:HER2 RQR8 +	0.4499	Yes	***	0.0003
	1	1.08345								shVHL RQR8- vs. shVHL RQR8+	0.2532	Yes	*	0.0441
	1	1.14946								shVHL RQR8- vs. shNTC:HER2 RQR8 -	-0.04498	No	ns	0.9954
	1	1.134								shVHL RQR8- vs. shNTC:HER2 RQR8 +	-0.09765	No	ns	0.9197
			1.04104	0.69357						shVHL RQR8- vs. shVHL:HER2 RQR8 -	-0.006817	No	ns	0.9959
			0.83288	0.653533						shVHL RQR8- vs. shVHL:HER2 RQR8 +	0.29	Yes	*	0.0173
			1.0134	0.78057						shVHL RQR8+ vs. shNTC:HER2 RQR8 -	-0.2982	Yes	*	0.0153
					1.11628	1.07934				shVHL RQR8+ vs. shNTC:HER2 RQR8 +	-0.3509	Yes	**	0.0038
					1.05842	1.12772				shVHL RQR8+ vs. shVHL:HER2 RQR8 -	-0.26	Yes	*	0.0383
					0.847571	0.973199				shVHL RQR8+ vs. shVHL:HER2 RQR8 +	0.03682	No	ns	0.9959
							1.02326	0.556772		shNTC:HER2 RQR8 - vs. shNTC:HER2 RQR8 +	-0.05266	No	ns	0.9938
							1.00679	0.741848		shNTC:HER2 RQR8 - vs. shVHL:HER2 RQR8 -	0.03817	No	ns	0.9959
							0.877722	0.718593		shNTC:HER2 RQR8 - vs. shVHL:HER2 RQR8 +	0.335	Yes	**	0.0058
										shNTC:HER2 RQR8 + vs. shVHL:HER2 RQR8 -	0.09083	No	ns	0.9356
										shNTC:HER2 RQR8 + vs. shVHL:HER2 RQR8 +	0.3877	Yes	**	0.0014
										shVHL:HER2 RQR8 - vs. shVHL:HER2 RQR8 +	0.2969	Yes	*	0.0153

## Sheet: Fig 3 - Fig S1C
day2		day3		day6		day9		day12
HER2 shNTC	HER2 shCD5	HER2 shNTC	HER2 shCD5	HER2 shNTC	HER2 shCD5	HER2 shNTC	HER2 shCD5	HER2 shNTC	HER2 shCD5
494000	476000	975000	628000	789000	407000	717000	198184	824000	638000
695000	684000	1270000	975000	830000	546000
574000	519000	1050000	812000	581000	429000	511000	296641	1260000	632000
1	0.963563	1.97368	1.27126	1.59717	0.823887	1.45142	0.401182	1.66802	1.2915
1	0.984173	1.82734	1.40288	1.19424	0.785612
1	0.904181	1.82927	1.41463	1.0122	0.747387	0.890244	0.516796	2.19512	1.10105
Šídák's multiple comparisons test shNTC vs shCD5	Mean Diff.	95.00% CI of diff.	Below threshold?	Summary	Adjusted P Value
day2	0.04936	-0.3847 to 0.4834	No	ns	0.9989
day3	0.5138	0.07981 to 0.9479	Yes	*	0.0165
day6	0.4822	0.04821 to 0.9163	Yes	*	0.0257
day9	0.7118	0.1803 to 1.243	Yes	**	0.0064
day12	0.7353	0.2037 to 1.267	Yes	**	0.0049

## Sheet: Fig 3 - Fig S1D-E
PC070e
																			shNTC	shVHL
																			1	0.63026
																			1	0.842711
																			1	0.690457
																			1	0.749084
											relevant bands used in Fig S3D-E
											Additional info (PC070e):								Table Analyzed	Norm
											Protein ladder: Precision Plus Protein™ Dual Color Standards (Biorad)
											Running buffer: MES								Column B	shVHL
				band1	band2	VHL	ACTIN				Cut membrane: at 75kd and 37kDa before incubation with primary and secondary antibodies								vs.	vs.
	donor1 n1	3d	NTC	1815.43	5606.58	7422.01	7546.54	0.983498	1		Method od detection: ECL								Column A	shNTC
		3d	VHL	1525.13	5234.84	6759.98	9133.88	0.740099	0.752517
		6d	NTC	7640.63		7640.63	9407	0.812228	1										Paired t test
		6d	VHL	4349.83		4349.83	8497.17	0.511915	0.63026										P value	0.0092
	donor2 n2	6d	NTC	1685.43	4870.84	6556.27	8479.35	0.773204	1										P value summary	**
		6d	VHL	1359.6	4500.96	5860.56	8994.28	0.651588	0.842711										Significantly different (P < 0.05)?	Yes
																			One- or two-tailed P value?	Two-tailed
																			t, df	t=6.008, df=3
PC070g																			Number of pairs	4
													VHL	PPIB	norm to PPIB				How big is the difference?
											PC070e	NTC n1 d4	9621.57	7606.73	1.26488				Mean of differences (B - A)	-0.272
											PC070e	VHL n1 d4	7597.55	10841.3	0.700795	0.554042			SD of differences	0.09055
																			SEM of differences	0.04527
											PC070g	NTC n4 d6	8066.09	11277.5	0.715237				95% confidence interval	-0.4161 to -0.1279
											PC070g	VHL n4 d6	6408.24	12976.3	0.49384	0.690457			R squared (partial eta squared)	0.9233
											PC070g	NTC n5 d6	9008.38	8532.9	1.05572
											PC070g	VHL n5 d6	7683.48	9715.78	0.790825	0.749084			How effective was the pairing?
																			Correlation coefficient (r)	Horizontal line
																			P value (one tailed)
																			P value summary
																			Was the pairing significantly effective?
											relevant bands used in Fig S3D-E
											Additional info (PC070e):
											Protein ladder: Precision Plus Protein™ Dual Color Standards (Biorad)
											Running buffer: MES (membrane 4) and MOPS (membane 3)
											Cut membrane: between 75 and 50kDa (only membrane 4 was cut)
											Method od detection: ECL

## Sheet: Fig 3 - Fig S1F
			OCR													ECAR
			baseline			oligomycin			FCCP			rotenone + antimycin A				baseline			oligomycin			FCCP			rotenone + antimycin A				Basal respiration		ATP production		Max respiration		SRC		Proton leak		Basal ECAR
		Time (min)	1.31134	7.81647	14.3047	20.8749	27.3527	33.8362	40.3984	46.8887	53.3839	59.9508	66.4523	72.9447		1.31134	7.81647	14.3047	20.8749	27.3527	33.8362	40.3984	46.8887	53.3839	59.9508	66.4523	72.9447		DMSO	FG	DMSO	FG	DMSO	FG	DMSO	FG	DMSO	FG	DMSO	FG
	21%O2	donor1	25.4603	20.5996	17.8682	10.2621	9.99985	9.94669	40.3555	40.3981	38.8335	6.41247	6.66463	7.40802		39.0635	40.031	41.2157	46.4152	47.5844	47.2351	47.9658	50.8336	50.9234	49.6963	50.1282	49.4987	Exp1	14.481	4.2606	11.2398	1.01267	33.034	9.53094	18.553	5.27034	3.24118	3.24794	40.1034	45.3462
		donor2	34.6302	29.9161	28.8626	14.9328	14.7169	15.5503	34.1755	32.5425	31.4042	10.2008	11.12	11.0302		64.1135	63.7316	64.0037	71.1796	71.4419	70.5724	68.7228	72.9793	73.4654	72.6029	71.8064	71.4871		20.3526	5.94014	16.0696	2.13541	21.9237	7.27981	1.5711	1.33967	4.28301	3.80473	63.9496	55.6229
		donor3	14.7533	13.5355	13.5544	10.1274	10.7914	12.3666	31.5741	27.854	26.1677	6.4245	7.29789	7.19806		49.1399	46.9896	47.2491	50.166	51.0612	50.7663	45.9273	48.0759	48.3265	45.264	45.1061	45.2019		6.97424	1.33216	2.8526	0.558783	21.5584	2.33501	14.5842	1.00285	4.12164	0.773373	47.7929	52.9196
		donor4	26.2262	20.7425	18.6833	9.43609	8.83417	9.92867	32.8832	32.078	30.9853	6.97181	7.56945	7.77804		42.0545	41.5095	42.2391	50.1406	50.7339	51.0193	50.0883	53.4281	53.1096	51.8466	51.7951	51.713		14.4442	5.72851	12.4843	1.85513	24.5424	6.8209	10.0982	1.09239	1.95988	3.87338	41.9344	56.4473
		donor5	21.7143	19.3401	18.7653	7.95064	8.29699	8.82611	38.4195	35.2092	34.12	5.77673	6.80953	6.90894		48.5136	48.428	49.0581	56.2434	57.4812	56.8981	52.2829	54.7461	55.5662	54.0852	53.708	53.6681		13.4415	4.67956	11.582	0.637171	29.4178	4.12815	15.9763	-0.551403	1.85951	4.04239	48.6666	46.8031
		donor6	15.611	13.2111	13.0666	4.87988	4.79122	5.74485	34.0806	29.4127	28.3868	3.34592	3.81972	3.23661		28.7318	28.7755	29.1358	34.8138	35.5742	35.9333	35.3004	36.3651	36.4933	35.3798	35.2128	35.3943		10.4955	7.70124	8.82425	2.72641	27.1593	7.31033	16.6638	-0.390912	1.67124	4.97483	28.881	62.1269
		donor7	148.53	142.264	141.18	46.2331	47.0523	49.6238	407.653	424.275	433.812	19.6387	23.3429	24.4537		102.904	102.307	101.859	122.144	121.342	123.102	115.657	118.412	119.947	115.644	111.077	116.263	Exp2	121.513	27.2681	96.3546	13.7855	399.435	52.4155	277.923	25.1474	25.158	13.4826	102.357	103.03
		donor8	105.153	104.94	105.455	61.853	46.6394	42.6332	255.958	278.891	287.152	16.9012	20.0996	23.8024		103.944	105.424	106.32	118.155	119.798	120.931	109.21	112.779	114.372	108.929	108.55	108.485		84.9148	4.34524	54.8073	0.348183	253.733	11.8983	168.818	7.55303	30.1074	3.99705	105.229	62.3895
		donor9	33.6592	33.8624	34.0545	12.846	9.85339	10.9632	112.206	111.37	110.389	2.50283	3.30169	4.07352		60.6788	60.4569	60.1768	76.5778	75.9873	75.7744	73.2225	74.5051	75.8393	78.4508	75.6722	74.7481		30.566	-0.958189	22.6378	-4.55242	108.029	12.1743	77.463	13.1324	7.92819	3.59423	60.4375	54.5435
		donor10	73.2489	67.8236	67.9983	35.5631	32.8493	34.1454	300.656	302.887	314.503	9.2796	15.0099	17.9932		86.3113	86.7092	87.9366	101.881	100.397	103.1	97.7049	97.0462	99.5378	106.892	103.175	102.126		55.596	11.4035	35.5044	3.24405	291.921	24.0163	236.325	12.6128	20.0917	8.15948	86.9857	87.0855
		donor11	43.8991	40.8039	40.0866	18.487	20.1001	20.7701	124.332	126.085	130.523	8.17318	12.1233	13.4863		73.4842	74.1023	75.7513	84.3492	84.9752	86.1542	83.9001	84.2368	87.1333	84.859	81.031	84.7668		30.3356	6.70241	21.8108	0.617601	115.719	15.8923	85.3833	9.18986	8.52481	6.08481	74.4459	55.451
		donor12	68.8285	65.7251	65.8224	28.8471	27.6366	28.4964	232.807	238.852	242.903	8.28853	14.0964	16.9661		92.4624	94.1073	94.3858	103.051	103.701	103.985	101.093	103.725	107.059	91.7463	89.9132	91.1144		53.675	11.9763	38.4653	4.65084	225.07	18.8725	171.395	6.89624	15.2097	7.32541	93.6518	80.8654
	FG treated cells	donor1	7.64679	7.13167	6.70185	6.0452	6.216	6.18112	15.0122	11.5129	10.7663	2.77111	3.12203	2.80538		45.7381	45.3137	44.9868	45.8926	46.5816	45.823	41.8593	44.2904	44.3937	43.2235	42.8384	42.586
		donor2	11.9414	9.92745	8.90336	8.16035	8.00148	8.20421	13.9942	11.3002	9.49686	4.10713	4.53188	4.31285		55.6668	55.4663	55.7356	57.315	58.1932	58.082	51.0174	54.153	55.0205	53.3935	53.3639	53.2043	Shapiro-Wilk test
		donor3	8.47132	6.88248	6.62837	7.27664	6.3821	6.64707	8.19823	8.10421	8.68828	6.08778	5.70153	6.19638		53.4777	52.8138	52.4673	52.3289	52.9199	52.353	45.2698	46.7898	47.0698	47.6719	47.8997	47.8373	W	0.8171	0.8026	0.8006	0.7944	0.8156	0.7489	0.8283	0.8668	0.8316	0.8569	0.9347	0.8391
		donor4	8.71376	7.71473	8.81076	7.1609	6.23732	6.27562	11.4262	8.68736	8.40284	3.07775	2.79755	2.17842		57.3313	56.108	55.9025	56.463	57.4074	57.4204	51.5662	54.7679	55.1723	54.9035	54.6651	54.5416	P value	0.0148	0.01	0.0095	0.0081	0.0142	0.0026	0.02	0.0595	0.0219	0.0447	0.4331	0.027
		donor5	9.33018	8.77944	7.84122	7.82079	8.04521	8.17333	9.25074	8.18609	6.85981	3.77162	4.84384	3.29671		47.5821	46.4593	46.3678	46.6604	46.6481	46.49	40.4633	43.0279	43.9665	42.9742	42.922	42.5964	Passed normality test (alpha=0.05)?	No	No	No	No	No	No	No	Yes	No	No	Yes	No
		donor6	12.1736	9.79765	8.86734	8.15645	7.13837	7.36459	12.3789	8.9277	8.35928	2.86971	2.62645	2.23876		61.9939	62.2053	62.1814	62.9449	63.1287	62.4153	59.6187	61.6907	61.662	59.0836	58.8331	58.6043	P value summary	*	*	**	**	*	**	*	ns	*	*	ns	*
		donor7	38.9849	35.9119	36.3653	22.1031	23.9253	23.8772	73.8488	61.9348	50.9208	10.2412	9.4775	9.73921		102.263	102.977	103.85	100.308	99.6408	102.202	94.5852	97.4167	98.2754	90.1516	88.2519	89.018	Wilcoxon matched-pairs signed rank test
		donor8	12.9196	11.9845	12.2469	10.0792	13.1299	12.8973	21.7188	19.7841	18.3071	7.18884	8.04085	8.88559		62.3559	62.3339	62.4786	60.4187	59.7541	59.8714	51.7326	53.1362	53.5769	51.3889	49.9484	49.1898	P value	0.0005		0.0005		0.0005		0.0005		0.0522		0.6221
		donor9	3.30385	3.43543	4.12224	5.90285	8.8385	9.77743	17.482	16.3892	16.3876	5.72009	4.43651	3.57948		55.4008	54.0861	54.1437	56.9943	54.6136	54.0691	46.3188	47.4087	47.587	44.5997	43.6638	43.4194	Exact or approximate P value?	Exact		Exact		Exact		Exact		Exact		Exact
		donor10	23.8539	21.0387	19.5022	16.1257	19.0628	19.4743	40.7084	32.1746	29.3502	10.5278	9.66119	9.99533		86.1989	87.6687	87.389	80.885	79.2996	79.0262	70.8625	72.6714	73.8053	68.0126	65.4633	65.9638	P value summary	***		***		***		***		ns		ns
		donor11	11.7353	10.1197	10.1696	8.88967	10.1432	11.139	22.9033	18.9848	17.7061	4.23016	3.73265	3.95457		54.8285	55.7817	55.7427	54.5169	53.205	54.5503	46.349	47.6951	48.1306	42.1597	41.7683	42.6273	Significantly different (P < 0.05)?	Yes		Yes		Yes		Yes		No		No
		donor12	20.32	17.1411	16.2535	11.8272	13.8067	14.1283	30.1089	23.3246	20.9699	6.5196	6.5176	4.74873		80.4793	80.7261	81.3909	77.1714	76.1146	75.5855	65.2482	67.4261	67.7949	62.0513	60.3623	61.2565	One- or two-tailed P value?	Two-tailed		Two-tailed		Two-tailed		Two-tailed		Two-tailed		Two-tailed
																												Sum of positive, negative ranks	0.000 , -78.00		0.000 , -78.00		0.000 , -78.00		0.000 , -78.00		14.00 , -64.00		32.00 , -46.00
																												Sum of signed ranks (W)	-78		-78		-78		-78		-50		-14
																												Number of pairs	12		12		12		12		12		12
																												Number of ties (ignored)	0		0		0		0		0		0
																													Basal respiration		ATP production		Max respiration		SRC		Proton leak		Basal ECAR

## Sheet: Fig 3 - Fig S1G
			OCR													ECAR
			baseline			oligomycin			FCCP			rotenone + antimycin A				baseline			oligomycin			FCCP			rotenone + antimycin A				Basal respiration		ATP production		Max respiration		SRC		Proton leak		Basal ECAR
		Time (min)	1.40742	7.9304	14.4537	21.0441	27.569	34.0868	40.673	47.1969	53.7261	60.3118	66.8388	73.3686		1.31134	7.81647	14.3047	20.8749	27.3527	33.8362	40.3984	46.8887	53.3839	59.9508	66.4523	72.9447		shNTC	shVHL	shNTC	shVHL	shNTC	shVHL	shNTC	shVHL	shNTC	shVHL	shNTC	shVHL
	shNTC	donor1	79.2112	68.4153	61.9732	72.4408	70.0466	65.9441	130.033	137.223	132.576	22.5057	23.4536	23.2844		98.6804	100.039	102.888	124.198	126.373	128.101	150.826	142.968	135.427	135.211	131.928	131.027	Exp1	46.7853	35.9277	0.389377	7.58295	110.196	87.2683	63.4108	51.3406	46.3959	28.3447	100.536	84.8883
		donor2	45.2005	42.0078	41.9936	17.916	17.5958	17.4599	73.4264	69.3698	68.8664	9.34864	10.3647	10.0022		46.6984	45.4556	46.6304	59.1833	60.9768	60.9789	62.723	63.9422	66.1268	63.9152	64.2829	64.4205	Exp2	33.1622	30.5509	25.4101	24.8434	60.649	56.8898	27.4869	26.3389	7.75207	5.70755	46.2615	37.2992
		donor3	28.9564	18.4429	21.2253	5.87255	4.95749	7.18062	38.977	32.9355	29.3185	3.33476	3.57099	3.80726		52.1161	44.5344	45.2133	53.2282	53.5856	54.6582	58.326	58.7273	59.4992	64.6137	63.1571	63.1248	Exp3	19.3039	13.0256	16.8713	9.11883	30.1726	26.4806	10.8688	13.455	2.43255	3.90674	47.2879	42.2271
	shVHL	donor1	63.0856	52.6023	48.3533	48.851	46.6565	45.7848	104.52	112.673	100.87	18.1987	18.6709	19.3885		82.6917	84.5058	87.4673	97.9278	103.644	107.046	139.702	134.018	129.219	125.993	126.608	125.632
		donor2	38.2166	36.231	34.6174	12.205	11.0267	11.3032	71.0106	59.8248	57.2462	6.36387	6.19322	4.85509		37.8085	36.2848	37.8043	46.5256	48.8633	50.3996	51.405	54.1194	55.7904	51.5626	52.8677	53.4151
		donor3	18.7853	17.296	16.5309	7.74335	8.30514	9.2072	32.6097	31.0239	29.3437	5.31771	4.54972	3.66803		42.5716	41.7246	42.3851	47.2729	47.7651	47.8874	51.2321	51.2748	51.9826	51.9242	51.7818	51.8747

## Sheet: Fig 3 - Fig S1I 
FG-4592 data
[Agonist] vs. normalized response	DMSO	FG			1	2	3	4	5	6	7	8	9	10	11	12
Best-fit values				A	50	50	50	49	50	51	49	49	49	49	48	50
EC50	0.3135	1.391		B	50	51	50	49	49	48	48	49	49	49	49	49
logEC50	-0.5037	0.1435		C	49	4625	5494	4625	7997	4571	6934	12578	10523	11597	12706	50
Goodness of Fit				D	50	13956	15342	13151	15203	14606	15467	15052	15019	15290	16542	49
Degrees of Freedom	6	6		E	49	7520	13110	4600	4606	4595	4609	13276	12935	7041	8248	49
R squared	-0.09042	0.5273		F	51	15465	15238	13326	14918	13376	14789	14005	14741	16368	16650	50
Sum of Squares	5816	3047		G	49	4560	4550	4545	15845	15469	15633	16052	4479	4506	4493	49
Sy.x	31.13	22.53		H	50	50	49	50	49	49	49	50	49	49	50	50
Constraints
EC50	EC50 > 0	EC50 > 0					zero	4525.5	max	15749.8
Number of points
# of X values	12	12					DMSO				FG
# Y values analyzed	7	7				E:T ratio	donor1	donor2	donor3	donor4	donor1	donor2	donor3	donor4
						5	4625	4600			7520	4571			Raw values
						1	5494	4606	12578	10523	13110	6934	13276	12935
						0.2		7041				12706
						5	99.1135	99.3363			73.3212	99.5946			%cytotox
						1	91.3714	99.2828	28.258	46.5666	23.5183	78.542	22.0393	25.0774
						0.2		77.5887				27.1176
shVHL data
				Experiment ID / donor #		Resazurin absorbance values																% cytotoxicity
				PC070b donor 04	T cell # ->	20000	10000	5000	2500	1250	625	313	Pos CT (no T cells)			Neg CT (no cancer cells and no T cells)						20000	10000	5000	2500	1250	625	313
[Agonist] vs. normalized response	NTC shRNA	VHL shRNA			04 VHL	9142	9249	10676	13367	15627	15443	17854	19925	20489	19533	8149	8181	8066	8137	7995	7981	90.7106	89.8048	77.7255	54.9466	35.8161	37.3736	16.9649
Best-fit values					04 NTC	8270	9267	11661	14541	15852	15976	17511	20404	19421	19377	8098	8151	7995	8025	7897	7860	98.0919	89.6524	69.3876	45.0089	33.9115	32.8619	19.8684
EC50	3587	1639				Resazurin absorbance values																% cytotoxicity
logEC50	3.555	3.214		PC070d donor 3 7 16 and 17	T cell # ↓	3 NTC	3 VHL	7 NTC	7 VHL	16 NTC	16 VHL	17 NTC	17 VHL	Pos CT				Neg CT				3 NTC	3 VHL	7 NTC	7 VHL	16 NTC	16 VHL	17 NTC	17 VHL
95% CI (profile likelihood)					20000			9193	8240	10289	9078	10927		16616	16424	16481	17072	7611	7681							69.9685	83.7287	62.7191
EC50	2939 to 4393	1449 to 1853			10000			9783	8238	10890	9717	11235	9087	15952	16248	16012	16769									63.1395	76.4679	59.2194	83.6264
logEC50	3.468 to 3.643	3.161 to 3.268			5000	12454	10449	10854	9349	11806	10707	12395	9984									45.3683	68.1504	63.5486	80.6494	52.7313	65.2189	46.0387	73.4341
Goodness of Fit					2500	13515	11192	12327	10458	12764	11832	13384	11409		pos			neg				33.3125	59.708	46.8114	68.0482	41.8459	52.4359	34.801	57.2423
Degrees of Freedom	34	33			1250	14364	13000	13985	11739	13843	12843	14119	13163		16446.8			7646				23.6656	39.1643	27.972	53.4926	29.5855	40.9482	26.4495	37.3122
R squared	0.8553	0.9432			625	14949	14020	14608	12877	14228	13761	14491	13765									17.0184	27.5744	20.8931	40.5619	25.2109	30.5173	22.2225	30.4718
Sum of Squares	3170	1276			312.5	15959	15436	15403	14334	15152	14619	15313	14291									5.54214	11.4848	11.8598	24.0065	14.7118	20.7681	12.8824	24.4951
Sy.x	9.656	6.219			156.25	17155	16096	16791	15388	16104	15299	15879	15477									-8.04761	3.98546	-3.9116	12.0302	3.89455	13.0415	6.45115	11.0189
Constraints
EC50	EC50 > 0	EC50 > 0				NTC shRNA					VHL shRNA
					T cell numbe\Donor	O4	3	7	16	17	O4	3	7	16	17
Number of points					20000	98.09			69.97	62.72	90.71			83.73
# of X values	80	80			10000	89.65			63.14	59.22	89.8			76.47	83.63
# Y values analyzed	35	34			5000	69.39	45.37	63.55	52.73	46.04	77.73	68.15	80.65	65.22	73.43
					2500	45.01	33.31	46.81	41.85	34.8	54.95	59.71	68.05	52.44	57.24
					1250	33.91	23.67	27.97	29.59	26.45	35.82	39.16	53.49	40.95	37.31
					625	32.86	17.02	20.89	25.21	22.22	37.37	27.57	40.56	30.52	30.47
					312.5	19.87	5.54	11.86	14.71	12.88	16.96	11.48	24.01	20.77	24.5
					156.25		-8.05	-3.91	3.89	6.45		3.99	12.03	13.04	11.02

## Sheet: Fig 3 - Fig S1J
	1day FG																					3day FG
	DMSO	FG	Resazurin absorbance values										% cytotoxicity									DMSO	FG	Resazurin absorbance values										% cytotoxicity
	1dayFG	T cell #\donor	O3	7	16	17	O3	7	16	17			DMSO				1dayFG					3dayFG	T cell #\donor	O3	8	9	17	O3	8	9	17			DMSO				1dayFG
									7917	7745									96.7069	98.4993							7789				8686						98.0408				88.693
		10000			7915	7821			8091	7871					96.7277	97.7073			94.8936	97.1863							8337				10092						92.33				74.0407
		5000	10711	8513	9269	8164	12112	10155	8987	8540	pos CT	17196.8	78.4353	81.0331	82.6174	94.1328	67.7972	66.0349	85.5562	90.2145			5000	10938	17601		9425	14263	17654		11307	pos CT		77.8212	30.5096		80.9917	54.2116	30.1333		61.3789
		2500	13551	10104	9892	9218	14232	11392	10944	10168	21040.7	17384.5	56.8706	66.5007	76.125	83.1489	51.6996	54.736	65.1618	73.2487			2500	13346	17515		10743	15324	17474		12990	21897.8	17196.8	60.7228	31.1203		67.2565	46.6778	31.4114		43.84
		1250	15284	11301	12034	11420	16298	12313	12706	11869	neg CT	7601	43.7116	55.5672	53.8027	60.2013	36.012	46.3235	46.7996	55.5222			1250	15222	18133	18409	12454	16513	17607	19070	13512	neg CT		47.4021	26.7321	24.7723	49.4258	38.2351	30.467	20.0788	38.4001
		625	17087	16067	13378	13913	17341	14000	14110	13559	7871	6436.5	30.021	12.0342	39.7966	34.2212	28.0923	30.9143	32.1682	37.9103			625	17183	18034	18674	13454	17081	18251	20407	14159	7814.5	7601	33.4777	27.4351	22.8907	39.0046	34.202	25.8942	10.5853	31.6576
		313		13540	15010	15062		15458	15020	14640				35.116	22.7891	22.2472		17.5968	22.6849	26.645			313				14966				15107						23.2477				21.7783
		156		16252	15651	16173			16457	15793				10.3444	16.1091	10.6693			7.70962	14.6293			156				16014										12.3262
		DMSO	FG-4562																				DMSO	FG-4562
	[Agonist] vs. normalized response																					[Agonist] vs. normalized response
	Best-fit values																					Best-fit values
	EC50	0.1108	0.1378																			EC50	0.1998	0.3294
	logEC50	-0.9555	-0.8607																			logEC50	-0.6993	-0.4823
	95% CI (profile likelihood)																					95% CI (profile likelihood)
	EC50	0.09207 to 0.1332	0.1168 to 0.1625																			EC50	0.1367 to 0.2942	0.2368 to 0.4646
	logEC50	-1.036 to -0.8756	-0.9327 to -0.7891																			logEC50	-0.8643 to -0.5313	-0.6257 to -0.3330
	Goodness of Fit																					Goodness of Fit
	Degrees of Freedom	23	24																			Degrees of Freedom	17	17
	R squared	0.9163	0.9323																			R squared	0.6872	0.6504
	Sum of Squares	1639	1327																			Sum of Squares	3683	2426
	Sy.x	8.442	7.435																			Sy.x	14.72	11.95
	Constraints																					Constraints
	EC50	EC50 > 0	EC50 > 0																			EC50	EC50 > 0	EC50 > 0
	Number of points																					Number of points
	# of X values	48	48																			# of X values	32	32
	# Y values analyzed	24	25																			# Y values analyzed	18	18

## Sheet: Fig 3 - Fig S1K
	EC50 values (E:T ratio)
days with FG-4592 treatment	1	3	7
	1.34637	1.73093	5.401
	0.74799	0.967381	7.456
	0.81369	1.64177	5.798
	1.36105	2.13339	2.671
	1.30531		1.565
	1.04981		3.049
			3.558
Wilcoxon Signed Rank Test
Sum of signed ranks (W)	11	8	28
Sum of positive ranks	16	9	28
Sum of negative ranks	-5	-1	0
P value (two tailed)	0.3125	0.25	0.0156
Exact or estimate?	Exact	Exact	Exact
P value summary	ns	ns	*
Significant (alpha=0.05)?	No	No	Yes
