# Supplementary material for: Oxygen levels at the time of activation determine T cell persistence and immunotherapeutic efficacy
Source: eLife journal article supplement (doi:10.7554/elife.84280), 2023-05-11
Supplement: fig4-data1 [file Figure 4 - Source Data 1.xlsx]

## Sheet: Fig 4B
		RAW counts (x10e6)							norm to 21% CT
	days in hypoxia	1		3		7			1	3	7		Shapiro-Wilk test	1	3	7
		CT	treat	CT	treat								W	0.6947	0.9122	0.9352
	LK New	5.28	10.2	5.28	6.49333				1.93182	1.2298			P value	<0.0001	0.1963	0.5014
		9.62	5.94	9.62	2.52				0.617464	0.261954			Passed normality test (alpha=0.05)?	No	Yes	Yes
		5.52	3.03	5.52	2.04				0.548913	0.369565			P value summary	****	ns	ns
		2.26	3.36	2.26	1.718				1.48673	0.760177
		2.58		2.58										1	3	7
		9.504	13.3227	9.504	1.44				1.4018	0.151515			Theoretical median	1	1	1
	PC046d	31.35	32.25						1.02871				Actual median	0.992	0.911	0.452
	PC046d	33.9	37						1.09145				Number of values	27	13	10
	PC046d	2.62	3.9						1.48855
	PC046d												Wilcoxon Signed Rank Test
													Sum of signed ranks (W)	64	1	-55
	PC046e	12	11.9						0.991667				Sum of positive ranks	221	46	0
	PC046e	1.4	1.41						1.00714				Sum of negative ranks	-157	-45	-55
	PC046e	3.23	2.84						0.879257				P value (two tailed)	0.46	>0.99	0.002
	PC046e	0.948	0.808						0.852321				Exact or estimate?	Exact	Exact	Exact
													P value summary	ns	ns	**
	PC046f	35.2	25.3	19.1	17.4				0.71875	0.910995			Significant (alpha=0.05)?	No	No	Yes
	PC046f	0.407	0.39	0.251	0.552				0.958231	2.1992
													How big is the discrepancy?
	PC046g	1.91	1.72						0.900524				Discrepancy	-0.008	-0.089	-0.548
	PC046g	28.7	26.4	27.1	16.3				0.919861	0.601476
	PC046g	16.2	15.5	9.87	3.4				0.95679	0.344478
	PC072c	1.03788	1.34423			1.03788	0.646317		1.29517		0.622726
		1.11066	1.02618			1.11066	0.663925		0.923936		0.597776
		1.72128	1.5016			1.72128	0.710609		0.872372		0.412836
		1.85014	1.63427			1.85014	0.856509		0.883325		0.462944
		1.75525	2.00616			1.75525	0.731088		1.14295		0.416514
		1.92918	2.13679			1.92918	0.350471		1.10762		0.181668
	PC076c	3.55883	13.0451	3.55883	4.36137	3.55883	1.23481		3.66555	1.22551	0.34697
		2.44302	8.05997	2.44302	5.25948	2.44302	1.07828		3.29918	2.15286	0.441373
		5.42868	9.64606	5.42868	10.2764	5.42868	2.65941		1.77687	1.89299	0.489881
		5.96163	4.31969	5.96163	7.67716	5.96163	2.91128		0.724582	1.28776	0.488336

## Sheet: Fig 4C 
	CD62L MFI							CD25 MFI							TCF1 MFI							TOX MFI							GZMB MFI							PRFN MFI
days in 1%	0	1	0	3	0	7		0	1	0	3	0	7		0	1	0	3	0	7		0	1	0	3	0	7		0	1	0	3	0	7		0	1	0	3	0	7
PC041d					12123	9159						32956	50231						3545	4560						13115	25147						23368	47447						12213	24045
					10953	8871						38758	52099						3102	5429						13720	26460						26202	49713						12253	25214
					10546	7760						39125	54196						4865	5671						14228	22193						20977	49246						14150	22528
					14399	10701						32890	51210						1245	6357						17349	21826						21954	45764						13346	21462
					12336	9930						20887	43056						2200	5553						5522	17566
					15410	10969						29403	37844						2569	5575						6084	14107
					12626	7554						27982	41968						3160	4293						8188	9750
					18195	10904						28167	41611						3149	5696						9383	13897
					4320
					6370
PC046d	32800	34003						11248	12669
	26510	24860						12438	15241
	19301	21010						14961	17862
	13732	14086						23096	27410
PC046f	20862	21010	44656	17696				9074	9054	13265	19854
	10483	9156	8299	8208				13174	10675	23706	31189
PC046g	19714	15709						25217	21010
	23763	23763	15746	12101				14086	12815	12046	20813
	22716	18764	19995	12640				19211	15893	23650	26321
LK001	7197	10202	7197	8763				6064	5888	6064	6191
	8501	8437	8501	7430				5327	8917	5327	10459																		25267	28726	25267	25340
	3150	3288	3150	2693				3526	4096	3526	4573											4906	6095	4906	6979				16065	20588	16065	16518
	3168	4751	3168	2035				3302	4573	3302	4154											4459	5378	4459	5018				15823	28399	15823	16228
	2777	3755	2777	6042				7731	9633	7731	14126											3608	4558	3608	5410
	4507	7768	4507	8101				4162	5393	4162	4520											3282	4279	3282	4642				24551	26864	24551	29733
	3642	7104	3642	5771				5908	8840	5908	7892				3282	4082	3282	5334				5712	8634	5712	6919
	3351	4490	3351	4961				6119	7064	6119	8998				3216	3952	3216	4317				3403	4989	3403	5521				27669	22469	27669	77746
PC072b	27220	20612						5902	6339						2508	2453						3663	3889						8532	8246						6016	6150
	28403	18895						4702	5350						5468	5774						2423	3444						5603	7164						4229	5028
	10158	8980						7045	7749						2616	2546						5350	7706						8411	25539						7577	10794
	33491	25616						5806	5603						5603	4677						2496	2743						6870	5438						7224	6392
	26008	16619						5069	5774						5222	4034						1777	2058						6909	6663						6590	6645
	25461	14122						6535	6909						3198	3417						2324	2729						8929	9729						7771	8039
PC072c	8099	7479			8099	5224									1302	1421			1302	1459		1159	1292			1159	2052		6335	6733			6335	7333		580	561			580	730
	6404	5874			6404	4862									1280	1413			1280	1402		1434	1725			1434	2305		5474	9449			5474	14550		647	695			647	735
	9136	7003			9136	7612									791	943			791	1159		826	1147			826	1475		4614	3325			4614	3386		465	552			465	700
	6213	5521			6213	4219									1159	1190			1159	1195		1163	1230			1163	1870		3800	4202			3800	5291		518	538			518	616
	5664	6226			5664	4176									1086	1244			1086	1053		1179	1174			1179	1777		3266	3077			3266	2940		510	515			510	576
	6133	7221			6133	5837									882	931			882	1156		941	1065			941	1906		4472	6160			4472	17904		502	541			502	821
PC072d	11810	6682						29731	30652
	13998	7347						26809	25308
	12160	14545						41643	25231
	13160	7305						21434	20798
	12742	11372						34216	29913
	14205	8605						28664	32882
PC076c								8223	11438	8223	6794	8223	7367		2763	4066	2763	2987	2763	3859									20365	23252	20365	27890	20365	18895		9814	11640	9814	11472	9814	13433
								7993	9188	7993	9293	7993	11047		2429	2898	2429	2876	2429	4342									16472	21693	16472	24627	16472	21890		9240	10919	9240	11776	9240	15708
								5543	6870	5543	5619	5543	4319		2058	2558	2058	2756	2058	3663									17905	20365	17905	16570	17905	15895		7793	8828	7793	9454	7793	12411
								9509	11306	9509	10794	9509	10983		2058	2459	2058	2382	2058	4119									16181	17378	16181	16919	16181	16521		7948	9240	7948	9785	7948	14545
PC076d								4518	3174	4518	3374	4518	3654		2063	2155	2063	2642	2063	3110																7326	6813	7326	8803	7326	12267
								5293	5264	5293	5483	5293	5394		2400	2636	2400	2669	2400	3673																9591	10013	9591	10217	9591	14247
								3533	3063	3533	3616	3533	4830		2447	2515	2447	2533	2447	3239																10042	9757	10042	9536	10042	12520
								4895	4615	4895	6033	4895	7184		2447	2682	2447	2584	2447	4274																9702	9674	9702	10217	9702	16085
	CD62L relative MFI							CD25 relative MFI							TCF1 relative MFI							TOX relative MFI							GZMB relative MFI							PRFN relative MFI
days in 1%	1	3	7					1	3	7					1	3	7					1	3	7					1	3	7					1	3	7
PC041d	#DIV/0!	#DIV/0!	0.755506				PC041d	#DIV/0!	#DIV/0!	1.52418				PC041d	#DIV/0!	#DIV/0!	1.28632				PC041d	#DIV/0!	#DIV/0!	1.91742				PC041d	#DIV/0!	#DIV/0!	2.03043				PC041d	#DIV/0!	#DIV/0!	1.9688
	#DIV/0!	#DIV/0!	0.809915					#DIV/0!	#DIV/0!	1.34421					#DIV/0!	#DIV/0!	1.75016					#DIV/0!	#DIV/0!	1.92857					#DIV/0!	#DIV/0!	1.8973					#DIV/0!	#DIV/0!	2.05778
	#DIV/0!	#DIV/0!	0.735824					#DIV/0!	#DIV/0!	1.3852					#DIV/0!	#DIV/0!	1.16567					#DIV/0!	#DIV/0!	1.55981					#DIV/0!	#DIV/0!	2.34762					#DIV/0!	#DIV/0!	1.59208
	#DIV/0!	#DIV/0!	0.743177					#DIV/0!	#DIV/0!	1.55701					#DIV/0!	#DIV/0!	5.10602					#DIV/0!	#DIV/0!	1.25806					#DIV/0!	#DIV/0!	2.08454					#DIV/0!	#DIV/0!	1.60812
			0.804961							2.06138							2.52409							3.18109							#DIV/0!							#DIV/0!
			0.711811							1.28708							2.17011							2.3187							#DIV/0!							#DIV/0!
			0.598289							1.49982							1.35854							1.19077							#DIV/0!							#DIV/0!
			0.599286							1.4773							1.80883							1.48108							#DIV/0!							#DIV/0!
										#DIV/0!							#DIV/0!							#DIV/0!							#DIV/0!							#DIV/0!
										#DIV/0!							#DIV/0!							#DIV/0!							#DIV/0!							#DIV/0!
			#DIV/0!
			#DIV/0!
PC046d	1.03668	#DIV/0!	#DIV/0!				PC046d	1.12633	#DIV/0!	#DIV/0!				PC046d	#DIV/0!	#DIV/0!	#DIV/0!				PC046d	#DIV/0!	#DIV/0!	#DIV/0!				PC046d	#DIV/0!	#DIV/0!	#DIV/0!				PC046d	#DIV/0!	#DIV/0!	#DIV/0!
	0.937759	#DIV/0!	#DIV/0!					1.22536	#DIV/0!	#DIV/0!					#DIV/0!	#DIV/0!	#DIV/0!					#DIV/0!	#DIV/0!	#DIV/0!					#DIV/0!	#DIV/0!	#DIV/0!					#DIV/0!	#DIV/0!	#DIV/0!
	1.08854	#DIV/0!	#DIV/0!					1.1939	#DIV/0!	#DIV/0!					#DIV/0!	#DIV/0!	#DIV/0!					#DIV/0!	#DIV/0!	#DIV/0!					#DIV/0!	#DIV/0!	#DIV/0!					#DIV/0!	#DIV/0!	#DIV/0!
	1.02578	#DIV/0!	#DIV/0!					1.18679	#DIV/0!	#DIV/0!					#DIV/0!	#DIV/0!	#DIV/0!					#DIV/0!	#DIV/0!	#DIV/0!					#DIV/0!	#DIV/0!	#DIV/0!					#DIV/0!	#DIV/0!	#DIV/0!
	#DIV/0!	#DIV/0!	#DIV/0!					#DIV/0!	#DIV/0!	#DIV/0!					#DIV/0!	#DIV/0!	#DIV/0!					#DIV/0!	#DIV/0!	#DIV/0!					#DIV/0!	#DIV/0!	#DIV/0!					#DIV/0!	#DIV/0!	#DIV/0!
PC046f	1.00709	0.396274	#DIV/0!				PC046f	0.997796	1.49672	#DIV/0!				PC046f	#DIV/0!	#DIV/0!	#DIV/0!				PC046f	#DIV/0!	#DIV/0!	#DIV/0!				PC046f	#DIV/0!	#DIV/0!	#DIV/0!				PC046f	#DIV/0!	#DIV/0!	#DIV/0!
	0.873414	0.989035	#DIV/0!					0.810308	1.31566	#DIV/0!					#DIV/0!	#DIV/0!	#DIV/0!					#DIV/0!	#DIV/0!	#DIV/0!					#DIV/0!	#DIV/0!	#DIV/0!					#DIV/0!	#DIV/0!	#DIV/0!
	#DIV/0!	#DIV/0!	#DIV/0!					#DIV/0!	#DIV/0!	#DIV/0!					#DIV/0!	#DIV/0!	#DIV/0!					#DIV/0!	#DIV/0!	#DIV/0!					#DIV/0!	#DIV/0!	#DIV/0!					#DIV/0!	#DIV/0!	#DIV/0!
PC046g	0.796845	#DIV/0!	#DIV/0!				PC046g	0.833168	#DIV/0!	#DIV/0!				PC046g	#DIV/0!	#DIV/0!	#DIV/0!				PC046g	#DIV/0!	#DIV/0!	#DIV/0!				PC046g	#DIV/0!	#DIV/0!	#DIV/0!				PC046g	#DIV/0!	#DIV/0!	#DIV/0!
	1	0.768513	#DIV/0!					0.909769	1.72779	#DIV/0!					#DIV/0!	#DIV/0!	#DIV/0!					#DIV/0!	#DIV/0!	#DIV/0!					#DIV/0!	#DIV/0!	#DIV/0!					#DIV/0!	#DIV/0!	#DIV/0!
	0.826026	0.632158	#DIV/0!					0.827286	1.11294	#DIV/0!					#DIV/0!	#DIV/0!	#DIV/0!					#DIV/0!	#DIV/0!	#DIV/0!					#DIV/0!	#DIV/0!	#DIV/0!					#DIV/0!	#DIV/0!	#DIV/0!
	#DIV/0!	#DIV/0!	#DIV/0!					#DIV/0!	#DIV/0!	#DIV/0!					#DIV/0!	#DIV/0!	#DIV/0!					#DIV/0!	#DIV/0!	#DIV/0!					#DIV/0!	#DIV/0!	#DIV/0!					#DIV/0!	#DIV/0!	#DIV/0!
LK001	1.41754	1.21759	#DIV/0!				LK001	0.970976	1.02094	#DIV/0!				LK001	#DIV/0!	#DIV/0!	#DIV/0!				LK001	#DIV/0!	#DIV/0!	#DIV/0!				LK001	#DIV/0!	#DIV/0!	#DIV/0!				LK001	#DIV/0!	#DIV/0!	#DIV/0!
	0.992471	0.874015	#DIV/0!					1.67393	1.96339	#DIV/0!					#DIV/0!	#DIV/0!	#DIV/0!					#DIV/0!	#DIV/0!	#DIV/0!					1.1369	1.00289	#DIV/0!					#DIV/0!	#DIV/0!	#DIV/0!
	1.04381	0.854921	#DIV/0!					1.16166	1.29694	#DIV/0!					#DIV/0!	#DIV/0!	#DIV/0!					1.24236	1.42254	#DIV/0!					1.28154	1.0282	#DIV/0!					#DIV/0!	#DIV/0!	#DIV/0!
	1.49968	0.642361	#DIV/0!					1.38492	1.25803	#DIV/0!					#DIV/0!	#DIV/0!	#DIV/0!					1.2061	1.12536	#DIV/0!					1.79479	1.0256	#DIV/0!					#DIV/0!	#DIV/0!	#DIV/0!
	1.35218	2.17573	#DIV/0!					1.24602	1.82719	#DIV/0!					#DIV/0!	#DIV/0!	#DIV/0!					1.2633	1.49945	#DIV/0!					#DIV/0!	#DIV/0!	#DIV/0!					#DIV/0!	#DIV/0!	#DIV/0!
	1.72354	1.79743	#DIV/0!					1.29577	1.08602	#DIV/0!					#DIV/0!	#DIV/0!	#DIV/0!					1.30378	1.41438	#DIV/0!					1.09421	1.21107	#DIV/0!					#DIV/0!	#DIV/0!	#DIV/0!
	1.95058	1.58457	#DIV/0!					1.49628	1.33582	#DIV/0!					1.24375	1.62523	#DIV/0!					1.51155	1.21131	#DIV/0!					#DIV/0!	#DIV/0!	#DIV/0!					#DIV/0!	#DIV/0!	#DIV/0!
	1.3399	1.48045	#DIV/0!					1.15444	1.4705	#DIV/0!					1.22886	1.34235	#DIV/0!					1.46606	1.62239	#DIV/0!					0.812064	2.80986	#DIV/0!					#DIV/0!	#DIV/0!	#DIV/0!
	#DIV/0!	#DIV/0!	#DIV/0!					#DIV/0!	#DIV/0!	#DIV/0!					#DIV/0!	#DIV/0!	#DIV/0!					#DIV/0!	#DIV/0!	#DIV/0!					#DIV/0!	#DIV/0!	#DIV/0!					#DIV/0!	#DIV/0!	#DIV/0!
PC072b	0.757237	#DIV/0!	#DIV/0!				PC072b	1.07404	#DIV/0!	#DIV/0!				PC072b	0.97807	#DIV/0!	#DIV/0!				PC072b	1.0617	#DIV/0!	#DIV/0!				PC072b	0.966479	#DIV/0!	#DIV/0!				PC072b	1.02227	#DIV/0!	#DIV/0!
	0.665247	#DIV/0!	#DIV/0!					1.13781	#DIV/0!	#DIV/0!					1.05596	#DIV/0!	#DIV/0!					1.42138	#DIV/0!	#DIV/0!					1.2786	#DIV/0!	#DIV/0!					1.18893	#DIV/0!	#DIV/0!
	0.884032	#DIV/0!	#DIV/0!					1.09993	#DIV/0!	#DIV/0!					0.973242	#DIV/0!	#DIV/0!					1.44037	#DIV/0!	#DIV/0!					3.03638	#DIV/0!	#DIV/0!					1.42457	#DIV/0!	#DIV/0!
	0.764862	#DIV/0!	#DIV/0!					0.965036	#DIV/0!	#DIV/0!					0.834731	#DIV/0!	#DIV/0!					1.09896	#DIV/0!	#DIV/0!					0.791557	#DIV/0!	#DIV/0!					0.884828	#DIV/0!	#DIV/0!
	0.638996	#DIV/0!	#DIV/0!					1.13908	#DIV/0!	#DIV/0!					0.772501	#DIV/0!	#DIV/0!					1.15813	#DIV/0!	#DIV/0!					0.964394	#DIV/0!	#DIV/0!					1.00835	#DIV/0!	#DIV/0!
	0.554652	#DIV/0!	#DIV/0!					1.05723	#DIV/0!	#DIV/0!					1.06848	#DIV/0!	#DIV/0!					1.17427	#DIV/0!	#DIV/0!					1.0896	#DIV/0!	#DIV/0!					1.03449	#DIV/0!	#DIV/0!
	#DIV/0!	#DIV/0!	#DIV/0!					#DIV/0!	#DIV/0!	#DIV/0!					#DIV/0!	#DIV/0!	#DIV/0!					#DIV/0!	#DIV/0!	#DIV/0!					#DIV/0!	#DIV/0!	#DIV/0!					#DIV/0!	#DIV/0!	#DIV/0!
PC072c	0.923447	#DIV/0!	0.645018				PC072c	#DIV/0!	#DIV/0!	#DIV/0!				PC072c	1.0914	#DIV/0!	1.12058				PC072c	1.11475	#DIV/0!	1.77049				PC072c	1.06283	#DIV/0!	1.15754				PC072c	0.967241	#DIV/0!	1.25862
	0.917239	#DIV/0!	0.759213					#DIV/0!	#DIV/0!	#DIV/0!					1.10391	#DIV/0!	1.09531					1.20293	#DIV/0!	1.60739					1.72616	#DIV/0!	2.65802					1.07419	#DIV/0!	1.13601
	0.766528	#DIV/0!	0.833187					#DIV/0!	#DIV/0!	#DIV/0!					1.19216	#DIV/0!	1.46523					1.38862	#DIV/0!	1.78571					0.720633	#DIV/0!	0.733853					1.1871	#DIV/0!	1.50538
	0.888621	#DIV/0!	0.67906					#DIV/0!	#DIV/0!	#DIV/0!					1.02675	#DIV/0!	1.03106					1.05761	#DIV/0!	1.60791					1.10579	#DIV/0!	1.39237					1.03861	#DIV/0!	1.18919
	1.09922	#DIV/0!	0.737288					#DIV/0!	#DIV/0!	#DIV/0!					1.14549	#DIV/0!	0.969613					0.995759	#DIV/0!	1.50721					0.942131	#DIV/0!	0.900184					1.0098	#DIV/0!	1.12941
	1.1774	#DIV/0!	0.951737					#DIV/0!	#DIV/0!	#DIV/0!					1.05556	#DIV/0!	1.31066					1.13177	#DIV/0!	2.0255					1.37746	#DIV/0!	4.00358					1.07769	#DIV/0!	1.63546
	#DIV/0!	#DIV/0!	#DIV/0!					#DIV/0!	#DIV/0!	#DIV/0!					#DIV/0!	#DIV/0!	#DIV/0!					#DIV/0!	#DIV/0!	#DIV/0!					#DIV/0!	#DIV/0!	#DIV/0!					#DIV/0!	#DIV/0!	#DIV/0!
PC072d	0.565792	#DIV/0!	#DIV/0!				PC072d	1.03098	#DIV/0!	#DIV/0!				PC072d	#DIV/0!	#DIV/0!	#DIV/0!				PC072d	#DIV/0!	#DIV/0!	#DIV/0!				PC072d	#DIV/0!	#DIV/0!	#DIV/0!				PC072d	#DIV/0!	#DIV/0!	#DIV/0!
	0.524861	#DIV/0!	#DIV/0!					0.944011	#DIV/0!	#DIV/0!					#DIV/0!	#DIV/0!	#DIV/0!					#DIV/0!	#DIV/0!	#DIV/0!					#DIV/0!	#DIV/0!	#DIV/0!					#DIV/0!	#DIV/0!	#DIV/0!
	1.19613	#DIV/0!	#DIV/0!					0.605888	#DIV/0!	#DIV/0!					#DIV/0!	#DIV/0!	#DIV/0!					#DIV/0!	#DIV/0!	#DIV/0!					#DIV/0!	#DIV/0!	#DIV/0!					#DIV/0!	#DIV/0!	#DIV/0!
	0.555091	#DIV/0!	#DIV/0!					0.970328	#DIV/0!	#DIV/0!					#DIV/0!	#DIV/0!	#DIV/0!					#DIV/0!	#DIV/0!	#DIV/0!					#DIV/0!	#DIV/0!	#DIV/0!					#DIV/0!	#DIV/0!	#DIV/0!
	0.892482	#DIV/0!	#DIV/0!					0.87424	#DIV/0!	#DIV/0!					#DIV/0!	#DIV/0!	#DIV/0!					#DIV/0!	#DIV/0!	#DIV/0!					#DIV/0!	#DIV/0!	#DIV/0!					#DIV/0!	#DIV/0!	#DIV/0!
	0.605773	#DIV/0!	#DIV/0!					1.14715	#DIV/0!	#DIV/0!					#DIV/0!	#DIV/0!	#DIV/0!					#DIV/0!	#DIV/0!	#DIV/0!					#DIV/0!	#DIV/0!	#DIV/0!					#DIV/0!	#DIV/0!	#DIV/0!
	#DIV/0!	#DIV/0!	#DIV/0!					#DIV/0!	#DIV/0!	#DIV/0!					#DIV/0!	#DIV/0!	#DIV/0!					#DIV/0!	#DIV/0!	#DIV/0!					#DIV/0!	#DIV/0!	#DIV/0!					#DIV/0!	#DIV/0!	#DIV/0!
PC076c	#DIV/0!	#DIV/0!	#DIV/0!				PC076c	1.39098	0.826219	0.895902				PC076c	1.47159	1.08107	1.39667				PC076c	#DIV/0!	#DIV/0!	#DIV/0!				PC076c	1.14176	1.36951	0.927817				PC076c	1.18606	1.16894	1.36876
	#DIV/0!	#DIV/0!	#DIV/0!					1.14951	1.16264	1.38208					1.19308	1.18403	1.78757					#DIV/0!	#DIV/0!	#DIV/0!					1.31696	1.49508	1.32892					1.18171	1.27446	1.7
	#DIV/0!	#DIV/0!	#DIV/0!					1.2394	1.01371	0.779181					1.24295	1.33916	1.77988					#DIV/0!	#DIV/0!	#DIV/0!					1.13739	0.92544	0.887741					1.13281	1.21314	1.59258
	#DIV/0!	#DIV/0!	#DIV/0!					1.18898	1.13514	1.15501					1.19485	1.15743	2.00146					#DIV/0!	#DIV/0!	#DIV/0!					1.07398	1.04561	1.02101					1.16256	1.23113	1.83002
	#DIV/0!	#DIV/0!	#DIV/0!					#DIV/0!	#DIV/0!	#DIV/0!					#DIV/0!	#DIV/0!	#DIV/0!					#DIV/0!	#DIV/0!	#DIV/0!					#DIV/0!	#DIV/0!	#DIV/0!					#DIV/0!	#DIV/0!	#DIV/0!
PC076d	#DIV/0!	#DIV/0!	#DIV/0!				PC076d	0.702523	0.746791	0.808765				PC076d	1.0446	1.28066	1.50751				PC076d	#DIV/0!	#DIV/0!	#DIV/0!				PC076d	#DIV/0!	#DIV/0!	#DIV/0!				PC076d	0.929975	1.20161	1.67445
	#DIV/0!	#DIV/0!	#DIV/0!					0.994521	1.0359	1.01908					1.09833	1.11208	1.53042					#DIV/0!	#DIV/0!	#DIV/0!					#DIV/0!	#DIV/0!	#DIV/0!					1.044	1.06527	1.48546
	#DIV/0!	#DIV/0!	#DIV/0!					0.866969	1.02349	1.36711					1.02779	1.03515	1.32366					#DIV/0!	#DIV/0!	#DIV/0!					#DIV/0!	#DIV/0!	#DIV/0!					0.971619	0.949612	1.24676
	#DIV/0!	#DIV/0!	#DIV/0!					0.942799	1.06067	1.46762					1.09604	0.912379	1.74663					#DIV/0!	#DIV/0!	#DIV/0!					#DIV/0!	#DIV/0!	#DIV/0!					0.997114	1.00289	1.65791
Shapiro-Wilk test							Shapiro-Wilk test							Shapiro-Wilk test							Shapiro-Wilk test							Shapiro-Wilk test							Shapiro-Wilk test
W	0.9616	0.9575	0.9552				W	0.9826	0.932	0.9268				W	0.9526	0.9567	0.642				W	0.9475	0.9508	0.8582				W	0.7168	0.663	0.8654				W	0.9161	0.9055	0.9528
P value	0.3402	0.7971	0.6439				P value	0.8199	0.1684	0.2167				P value	0.3551	0.7479	<0.0001				P value	0.3867	0.7469	0.0288				P value	<0.0001	0.0005	0.0362				P value	0.0832	0.3231	0.4702
Passed normality test (alpha=0.05)?	Yes	Yes	Yes				Passed normality test (alpha=0.05)?	Yes	Yes	Yes				Passed normality test (alpha=0.05)?	Yes	Yes	No				Passed normality test (alpha=0.05)?	Yes	Yes	No				Passed normality test (alpha=0.05)?	No	No	No				Passed normality test (alpha=0.05)?	Yes	Yes	Yes
P value summary	ns	ns	ns				P value summary	ns	ns	ns				P value summary	ns	ns	****				P value summary	ns	ns	*				P value summary	****	***	*				P value summary	ns	ns	ns
Wilcoxon Signed Rank Test							Wilcoxon Signed Rank Test							Wilcoxon Signed Rank Test							Wilcoxon Signed Rank Test							Wilcoxon Signed Rank Test							Wilcoxon Signed Rank Test
Sum of signed ranks (W)	-247	-28	-105				Sum of signed ranks (W)	285	168	114				Sum of signed ranks (W)	182	49	251				Sum of signed ranks (W)	169	21	105				Sum of signed ranks (W)	140	35	75				Sum of signed ranks (W)	140	32	171
Sum of positive ranks	94	0	0				Sum of positive ranks	494	189	125				Sum of positive ranks	217.5	52	252				Sum of positive ranks	170	21	105				Sum of positive ranks	185.5	40	90				Sum of positive ranks	175	34	171
Sum of negative ranks	-341	-28	-105				Sum of negative ranks	-209	-21	-11				Sum of negative ranks	-35.5	-3	-1				Sum of negative ranks	-1	0	0				Sum of negative ranks	-45.5	-5	-15				Sum of negative ranks	-35	-2	0
P value (two tailed)	0.006	0.02	<0.001				P value (two tailed)	0.03	<0.001	0.002				P value (two tailed)	0.002	0.01	<0.001				P value (two tailed)	<0.001	0.03	<0.001				P value (two tailed)	0.013	0.0391	0.0166				P value (two tailed)	0.007	0.02	<0.001
Exact or estimate?	Exact	Exact	Exact				Exact or estimate?	Exact	Exact	Exact				Exact or estimate?	Exact	Exact	Exact				Exact or estimate?	Exact	Exact	Exact				Exact or estimate?	Exact	Exact	Exact				Exact or estimate?	Exact	Exact	Exact
P value summary	**	*	***				P value summary	*	***	**				P value summary	**	**	***				P value summary	***	*	***				P value summary	*	*	*				P value summary	**	*	***
Significant (alpha=0.05)?	Yes	Yes	Yes				Significant (alpha=0.05)?	Yes	Yes	Yes				Significant (alpha=0.05)?	Yes	Yes	Yes				Significant (alpha=0.05)?	Yes	Yes	Yes				Significant (alpha=0.05)?	Yes	Yes	Yes				Significant (alpha=0.05)?	Yes	Yes	Yes

## Sheet: Fig 4D
		ECAR - glucose stress test																										OCR - glucose stress test
		baseline			glucose			oligo			2-DG				Baseline		Glycolysis		Glycolytic reserve		Glycolytic capacity		Non glyco acid					baseline			glucose			oligo			2-DG
	Time (min)	1.40452	7.91587	14.4259	21.0135	27.5262	34.041	40.6164	47.134	53.6536	60.2314	66.7526	73.2704		21%O2	1%1day	21%O2	1%1day	21%O2	1%1day	21%O2	1%1day	21%O2	1%1day			Time (min)	1.40452	7.91587	14.4259	21.0135	27.5262	34.041	40.6164	47.134	53.6536	60.2314	66.7526	73.2704
21%O2	donor1	1.92993	1.92018	1.49401	1.64117	0.832417	1.02336				0.629797	0.653742	0.612538	Exp1	1.78137	5.77521	-0.615724	31.8744					0.632026	8.54826		21%O2	donor1	9.99108	5.71621	4.71298	5.57511	7.41846	7.47649				9.80193	9.33101	9.71344
	donor2	12.9693	12.3636	11.7492	47.8674	48.9224	49.1775				17.6103	11.6481	9.20883		12.3607	9.70768	36.2951	23.2271					12.8224	8.15682			donor2	74.4895	62.8783	59.2722	37.9416	32.1353	28.8923				22.2764	23.3503	23.8074
	donor3	1.91892	2.09669	1.94	7.56874	6.52964	6.52478				2.40113	1.56007	1.49312		1.98521	16.6019	4.88918	36.444					1.81811	13.475			donor3	19.3396	16.2566	14.6481	14.638	14.6702	14.7287				14.0474	14.2962	15.1624
	donor4	5.95381	4.29424	5.09375	34.948	37.4199	38.2251				10.4317	7.71718	6.79		5.11393	2.84629	31.7504	11.9091					8.31295	3.32394			donor4	45.966	41.8082	39.8755	30.7599	28.9458	26.5781				25.7993	26.3121	26.0568
	donor5	1.84063	1.57532	1.65238	2.84927	1.93131	1.57749				0.941246	0.648385	0.629911		1.68944	1.35827	0.429916	5.43647					0.739847	1.62026			donor5	14.0494	9.34431	9.04582	7.88049	8.35725	7.91951				6.76047	8.20408	8.37082
	donor6	7.10578	6.85441	6.85783	37.8103	40.8937	42.6852				13.0092	9.0618	8.10226		6.93934	6.79207	33.5237	29.4603					10.0578	8.60722			donor6	63.6268	56.2543	53.1562	33.0218	29.2717	26.9749				20.8273	21.6161	22.7874
	donor7	8.35039	7.82054	7.63016	46.3618	46.3503	45.0297				11.9651	10.4716	9.01005	Exp2	7.9337	15.5068	37.9802	73.5587					10.4823	20.9995			donor7	67.111	59.1049	54.1923	45.1393	40.3733	39.0955				42.4729	40.3037	38.7778
	donor8	85.44868*	87.67542*	87.29879*	113.2274*	109.6017*	108.8176*				53.8396*	41.421*	35.4999*														donor8
	donor9	12.8486	12.3269	11.5964	74.537	70.8889	68.1706				19.7256	14.2835	11.665		12.2573	12.9646	58.9416	70.9068					15.2247	18.9012			donor9	93.9268	83.1342	78.4516	56.4879	48.1369	43.7079				48.3535	45.0686	42.6418
	donor10	10.8376	10.7337	10.894	83.6818	85.7791	85.5329				23.3015	21.6324	18.9919		10.8217	15.9224	74.1762	98.3229					21.3086	25.9334			donor10	105.609	97.8571	95.0847	76.945	60.7636	56.9769				83.9408	79.1637	77.4143
	donor11	5.57531	5.16568	5.01919	40.2017	38.525	37.25				9.81631	6.79081	5.95243		5.25339	28.3298	33.4055	103.103					7.51985	31.3311			donor11	51.2555	43.7293	39.5277	28.3446	23.1725	20.9784				23.669	22.681	20.4555
	donor12	15.031	14.7413	14.2034	83.7081	78.7501	76.8321				22.5643	19.4003	16.6904		14.6585	17.511	65.1049	91.8398					19.5517	23.9161			donor12	128.676	119.518	113.75	82.2593	73.3748	69.0041				85.5807	84.4232	83.4835
	donor13	8.52745	7.91801	7.45233	68.5139	70.3463	69.6291	68.4272	66.1965	65.4897	19.5525	13.653	12.8886	Exp3	7.96593	7.98859	61.5305	70.3431	-2.79201	12.3087	58.7385	82.6518	15.3647	8.17077			donor13	70.3354	65.2217	55.5037	42.7554	31.9999	27.5371	20.9264	21.7193	23.2315	25.7023	27.137	30.1536
	donor14	5.48328	5.23709	4.7854	53.3874	58.3496	62.1877	79.7127	78.6634	84.6212	11.4359	9.35089	9.12022		5.16859	12.6156	52.8063	52.5425	23.0242	17.0061	75.8305	69.5486	9.96899	18.96			donor14	37.5506	40.498	40.9373	67.471	54.6741	52.008	27.5774	27.6588	27.1243	17.5992	18.0024	18.5351
	donor15	10.9934	10.5995	10.1888	79.9607	90.8823	93.9215	103.015	100.854	99.7022	25.5914	19.0523	17.9196		10.5939	14.1492	77.661	75.5809	12.9355	16.4074	90.5965	91.9882	20.8545	14.4456			donor15	81.1014	76.6146	78.5976	138.896	111.244	94.8951	62.1372	48.6872	43.2551	41.3029	37.7127	41.42
	donor16	20.7384	21.1841	20.9715	110.457	96.5977	91.3428	101.577	97.2888	97.8025	27.6633	18.7906	16.6916		20.9646	18.9264	78.5012	59.4034	-0.57634	15.6298	77.9249	75.0331	21.0485	19.5271			donor16	215.113	217.174	236.845	231.443	225.901	226.389	139.105	112.708	103.129	63.9468	60.3351	62.0879
	donor17	6.92903	7.85493	7.74108	59.0006	70.1771	75.105	85.5253	85.6576	89.3899	22.4079	15.0453	13.9024		7.50835	14.7847	60.5859	75.9609	18.7634	16.5264	79.3492	92.4873	17.1185	27.4006			donor17	62.1025	58.9464	55.553	55.26	38.6048	37.8474	28.8527	27.3102	28.7141	26.1849	30.3776	30.089
	donor18	5.85046	6.00183	5.7392	37.5253	49.3579	54.1632	71.3812	71.8166	76.2214	19.941	12.5495	11.5523		5.86383	6.93143	41.1516	36.3921	26.1242	28.9578	67.2759	65.3499	14.6809	14.1481			donor18	67.3119	63.4556	64.5514	69.3198	52.621	50.9611	29.0949	29.0259	30.3147	23.6869	22.655	25.5591
	donor19				77.958	76.6868	74.3849	93.7132	85.7196	89.0355	58.3875	45.4153	40.9456	Exp4					13.1462	21.6984							donor19				149.002	150.918	154.898	77.0623	60.089	53.5934	35.315	36.9228	35.1837
	donor20				80.8716	77.9354	75.5029	85.7635	84.3914	83.1222	38.6825	27.279	23.5073						6.32242	17.0757							donor20				30.3955	30.7729	32.0121	25.9368	19.533	16.9064	13.5486	15.1729	14.0062
	donor21				40.3328	43.9679	38.3741	44.3289	49.5644	50.759	19.8686	15.6982	14.4219						7.32584	12.9672							donor21				10.9447	12.5799	13.2018	10.6066	8.45229	15.4658	12.0605	13.0254	11.3195
	donor22				79.5495	78.1259	74.4332	87.1443	83.0592	86.2291	40.9129	27.7392	23.9235						8.10798	16.1773							donor22				79.1166	77.7969	79.3917	46.33	35.0764	25.0406	26.3828	26.6754	25.9533
	donor23				61.2672	60.3171	57.728	72.878	74.271	74.9667	35.3681	24.9345	21.2772						14.2678	21.7524							donor23				31.5222	31.7491	33.8669	15.7899	14.838	15.9188	26.0873	23.0087	20.5957
	donor24				71.2256	70.674	67.5252	85.0636	82.6069	82.3976	41.3419	28.7895	24.806						13.5478	11.0652							donor24				43.0446	38.5871	27.3043	18.6168	18.897	20.2124	20.0429	16.5319	15.5724
1%1day	donor1	5.78721	5.8614	5.67701	34.2675	38.6085	40.0727				10.9315	7.70054	7.01277	Statistical comparison - 21% vs 1%1day												1%1day	donor1	55.7439	50.1581	47.9338	36.3088	32.2696	31.2011				21.0622	19.5455	20.376
	donor2	10.4355	9.51883	9.16864	31.1471	33.2392	34.418				10.4482	7.68177	6.34052	Wilcoxon matched-pairs signed rank test	Baseline		Glycolysis		Glycolytic reserve		Glycolytic capacity		Non glyco acid				donor2	55.9105	45.8929	41.9079	30.0448	27.876	26.1853				20.1985	20.6991	20.2915
	donor3	17.1519	16.7231	15.9306	51.2858	53.1284	54.7234				17.2	12.5736	10.6515	P value	0.015		0.0797		0.0161		0.8438		0.1594				donor3	86.1644	75.9733	73.349	53.421	49.6665	46.2261				27.8995	28.3763	29.8499
	donor4	2.7754	2.90538	2.85809	14.1959	14.6993	15.3709				4.17596	3.04143	2.75444	Exact or approximate P value?	Exact		Exact		Exact		Exact		Exact				donor4	31.7169	25.1314	22.9282	19.4814	17.4278	16.6808				13.3839	14.387	13.605
	donor5	1.14446	1.31357	1.61677	6.98224	6.45808	6.9439				2.18357	1.36328	1.31392	P value summary	*		ns		*		ns		ns				donor5	27.0929	23.3821	18.222	16.8604	15.8791	14.8954				25.4524	29.0873	29.2182
	donor6	7.37399	6.65759	6.34465	33.3817	36.5163	38.8592				10.9002	8.13608	6.78543	Significantly different (P < 0.05)?	Yes		No		Yes		No		No				donor6	55.9504	50.7043	47.8136	31.1044	28.619	25.9624				21.1792	21.6106	20.4569
	donor7	16.114	15.3194	15.087	87.8205	88.8835	90.4924				23.1712	21.0146	18.8127	One- or two-tailed P value?	Two-tailed		Two-tailed		Two-tailed		Two-tailed		Two-tailed				donor7	148.319	133.748	131.952	109.036	100.662	96.7205				102.14	101.341	100.403
	donor8	13.91328*	14.02867*	14.95877*	89.80025*	94.24339*	96.10445*				16.7889*	17.05429*	15.68586*	Sum of positive, negative ranks	127.0 , -26.00		114.0 , -39.00		69.00 , -9.000		12.00 , -9.000		107.0 , -46.00				donor8
	donor9	13.3889	13.0949	12.4102	85.1488	83.7582	82.7075				23.4496	18.0647	15.1892	Sum of signed ranks (W)	101		75		60		3		61				donor9	99.6535	89.8522	84.6524	65.4081	55.7524	48.9527				65.2284	64.106	63.0806
	donor10	16.0642	15.4832	16.2197	110.798	114.781	117.156				27.1535	26.7136	23.9331	Number of pairs	17		17		12		6		17				donor10	154.106	148.242	148.231	105.733	88.5465	80.6644				106.747	108.254	109.125
	donor11	28.8013	28.3631	27.8249	135.576	131.666	127.057				34.9802	31.4597	27.5534	Number of ties (ignored)	0		0		0		0		0				donor11	289.208	270.629	262.856	189.576	167.774	158.538				166.411	164.14	163.476
	donor12	16.5961	17.6472	18.2899	109.972	109.683	108.398				25.9067	24.2167	21.625														donor12	177.248	170.184	175.825	145.102	131.717	126.84				129.233	128.218	127.254
	donor13	8.85824	7.93734	7.17019	74.1795	80.4126	80.403	93.1701	89.7048	89.0464	9.85304	7.36607	7.29319														donor13	88.2458	77.3582	61.8414	43.3303	27.7373	26.5282	33.5734	35.213	36.6912	17.2845	16.8485	23.007
	donor14	13.4381	12.6661	11.7426	61.2606	69.408	64.8056	81.3165	80.2679	84.908	23.0393	17.2716	16.569														donor14	124.759	110.327	100.323	47.014	40.662	42.1799	55.2949	52.0156	50.5131	30.8806	31.1382	34.7636
	donor15	13.9918	14.0571	14.3986	87.2389	90.2798	91.6714	109.628	105.264	103.519	17.9807	13.3148	12.0413														donor15	155.279	149.768	150.166	181.327	161.775	159.263	106.579	79.3151	67.2212	28.9059	29.8873	33.2661
	donor16	20.329	18.2637	18.1864	80.4493	79.0264	75.5135	93.813	93.2081	94.8574	23.3214	17.9855	17.2745														donor16	210.701	198.998	192.706	115.432	121.021	126.938	102.24	78.6558	69.1398	50.8601	45.9958	49.8483
	donor17	14.7594	14.5502	15.0445	87.1649	91.2597	93.8124	108.554	104.286	108.977	31.3577	26.3572	24.4868														donor17	139.772	145.661	143.413	153.011	133.111	126.504	129.034	92.5804	78.6937	32.4243	36.6563	40.9726
	donor18	7.25463	6.83095	6.7087	34.9735	45.7178	49.2794	71.838	71.6278	73.3783	17.8895	13.248	11.3069														donor18	77.9077	73.7624	72.9231	49.9244	41.1453	39.2126	32.2559	27.8408	27.4909	20.1001	17.9847	21.7321
	donor19				59.1469	59.8956	60.3844	86.2267	79.8073	78.4881	40.5868	29.1909	26.5657														donor19				53.0544	61.1941	58.7087	51.2808	43.4199	24.0573	28.5061	25.5293	24.1276
	donor20				72.9536	71.541	67.2487	88.6792	84.0165	90.2747	44.4591	34.163	29.624														donor20				60.3996	60.9031	62.6575	56.183	39.3941	30.1743	28.1045	25.879	23.692
	donor21				45.2444	48.4686	44.9101	57.6218	58.8304	61.0726	36.2238	27.57	24.1237														donor21				10.5332	14.2565	14.0739	15.2952	13.0155	10.8566	10.8246	11.4243	10.2929
	donor22				64.1534	67.1431	65.3349	82.5337	79.66	82.9697	41.7289	29.3285	28.137														donor22				76.2279	83.5078	87.6271	67.9527	52.4987	41.3018	41.2542	36.9667	35.1688
	donor23				66.8957	67.9451	65.9689	88.061	86.4968	91.5091	51.648	39.1693	33.7985														donor23				88.3637	87.7622	92.733	36.5991	39.8308	25.6617	32.3423	32.8887	30.5923
	donor24				80.1607	78.4253	73.5001	88.8046	87.2229	89.2542	43.08	34.9655	31.3914														donor24				68.0319	80.4079	71.4667	52.7603	46.7893	37.2205	32.4342	32.9414	30.5184
		*outlier	Each row in a different n derived from the median of at least 5 technical replicates
		Oligomycin stock used with donors 1-12 was off
		Donors 19-24 were assayed only assayed in media in glucose and followed by addition of oligomycin

## Sheet: Fig 4E 
			OCR - mitochondria stress test																												ECAR - mitochondria stress test
			baseline			oligomycin			FCCP			rotenone + antimycin A				Basal respiration		ATP production		Max respiration		SRC		Proton leak		Non mito acid					baseline			oligomycin			FCCP			Rotenone+antimycin
		Time (min)	1.40452	7.91587	14.4259	21.0135	27.5262	34.041	40.6164	47.134	53.6536	60.2314	66.7526	73.2704		21%O2	1%1day	21%O2	1%1day	21%O2	1%1day	21%O2	1%1day	21%O2	1%1day	21%O2	1%1day			Time (min)	1.40452	7.91587	14.4259	21.0135	27.5262	34.041	40.6164	47.134	53.6536	60.2314	66.7526	73.2704
	21%O2	donor1	41.8968	42.5506	44.232				106.832	88.947	84.7736	17.3215	19.5734	20.706	Exp1	23.6929	21.8766			74.3171	73.7625	50.6243	51.8859			19.2003	18.6875		21%O2	donor1	77.4076	75.8418	75.4064	82.3035	85.2363	88.2754	93.4159	97.8773	97.2776	94.2176	94.3932	94.5053
		donor2	41.2472	39.6634	37.7414				69.7954	68.8946	68.9049	19.7658	21.5814	21.762		18.5143	19.8876			48.1619	58.7725	29.6476	38.885			21.0364	28.0706			donor2	101.045	100.877	101.339	105.335	108.926	109.524	117.402	117.245	117.364	119.908	115.902	114.403
		donor3	110.528	106.795	105.141				261.672	307.451	322.447	28.5979	30.6088	32.6388		76.8727	101.744			266.575	425.593	189.702	323.849			30.6152	26.5629			donor3	126.141	127.673	128.435	137.735	139.678	147.215	164.7	164.506	165.12	153.255	146.606	143.31
		donor4	49.2118	50.4728	52.147				107.495	105.64	91.4109	16.9835	17.1014	17.6696		33.359	48.3257			84.2638	162.017	50.9048	113.691			17.2515	24.3052			donor4	80.9954	79.4015	81.03	84.1136	86.7133	89.662	102.826	106.567	108.085	107.962	106.078	105.184
		donor5	42.4088	43.8852	46.0555				104.96	93.8206	80.2761	15.7555	15.6571	18.7845		27.3842	43.4213			76.2864	132.784	48.9023	89.3625			16.7323	27.1636			donor5	79.0261	77.4962	76.9405	79.9851	79.4034	84.24	100.191	110.004	111.683	106.647	104.861	106.488
		donor6	48.7956	46.9618	47.3152				91.4675	85.2386	81.3311	17.7796	19.2822	20.7383		28.4242	38.1865			66.7457	117.135	38.3215	78.9484			19.2667	22.8918			donor6	94.3056	95.6493	96.841	98.4956	99.3534	103.66	117.665	120.182	120.56	120.788	116.822	115.493
		donor7	68.5943	62.9531	59.912				103.277	110.317	115.698	27.9145	25.3072	24.7379	Exp2	37.8333	64.7383			83.7777	193.579	45.9445	128.84			25.9865	36.9357			donor7	99.2724	95.9005	95.8375	112.738	109.266	102.811	123.273	120.828	118.006	114.969	110.597	108.059
		donor8	91.487	90.8842	95.9489				223.053	277.798	320.315	55.2354	39.6925	41.1114		47.427	35.44			228.375	148.182	180.949	112.742			45.3464	28.7443			donor8	135.302	134.983	137.34	152.224	154.821	154.725	152.498	149.711	147.595	161.669	153.095	155.167
		donor9	49.1189	45.8524	42.3366				78.1615	86.0214	91.6159	27.8228	27.1909	26.0452		18.7497	29.3001			58.2466	49.0056	39.497	19.7055			27.0196	19.8102			donor9	108.352	104.067	102.823	114.773	113.961	109.274	141.958	134.057	127.86	131.848	124.989	120.143
		donor10	36.2186	32.0864	30.8319				59.9299	63.7515	64.162	19.1292	18.4916	18.0506		14.4886	24.3629			44.0574	81.5298	29.5688	57.1668			18.5571	21.8935			donor10	93.1063	95.2651	97.0829	112.388	116.395	114.883	120.709	116.503	113.424	113.318	110.221	108.414
		donor11	31.8142	28.7025	26.3249				35.4146	35.4038	34.991	14.0906	14.9487	14.286		14.5055	83.642			20.8281	288.922	6.3226	205.28			14.4417	47.9644			donor11	76.5033	75.7142	74.7683	74.2684	75.5674	71.9698	88.9921	86.7373	81.4566	79.6146	78.3325	76.6801
		donor12	61.2173	57.6549	57.8872				118.03	129.026	136.988	26.802	26.4521	25.8792		32.542	45.7141			101.637	263.168	69.0948	217.454			26.3777	38.1409			donor12	109.492	108.713	109.405	113.34	113.65	107.843	127.963	126.24	123.896	123.389	117.624	114.703
		donor13	35.0329	30.8021	29.3946	27.7316	27.5568	27.0902	110.692	84.7432	68.0422	16.7886	12.7512	15.4664	Exp3	16.7411	25.4426	4.28368	16.8042	72.8236	41.1483	56.0824	15.7057	12.4575	8.63839	15.0021	11.9985			donor13	81.6749	80.6449	83.3409	105.895	99.1603	94.66	87.1878	87.4048	85.9381	99.3777	91.2056	76.4924
		donor14	45.0863	41.4671	35.4012	39.8679	34.0635	40.6374	56.9022	54.6105	63.5783	57.445	36.9762	25.141		0.797443	48.6572	2.46192	56.5162	18.5096	69.873	17.7121	21.2158	-1.66447	-7.85899	39.8541	38.0438			donor14	36.4648	37.8761	40.4492	78.8902	75.6518	68.6455	59.8279	60.5434	61.8563	81.8585	74.6622	61.9609
		donor15	62.5188	56.6669	52.0717	35.0632	36.1371	25.0427	101.831	91.2263	88.4839	68.7408	30.1611	23.7484		16.2024	24.2667	25.0048	32.2385	52.9636	67.9341	36.7613	43.6674	-8.80245	-7.97176	40.8834	44.8485			donor15	96.273	98.1889	98.2811	88.8148	87.6899	82.1127	80.6894	84.0751	83.8654	102.118	100.69	96.691
		donor16	119.112	111.071	112.178	107.131	75.2674	51.9231	232.901	301.232	286.334	209.06	30.4755	36.4629		22.1208	36.974	36.0129	56.3029	181.49	179.297	159.369	142.323	-13.8922	-19.3289	91.9994	62.4305			donor16	83.1904	86.5141	87.9302	102.282	98.6816	88.2893	62.7376	81.8383	77.4873	109.943	100.103	84.7892
		donor17	23.32	19.3716	18.0177	16.2845	16.4601	19.1455	31.0345	30.8134	28.0065	11.7313	7.80537	9.24908		10.6412	22.7199	2.93971	11.0087	20.3562	122.531	9.71506	99.8108	7.70145	11.7112	9.59526	53.5293			donor17	60.7748	61.6695	61.5728	60.4908	59.6639	54.2165	46.8236	50.3916	47.4423	60.1668	55.925	52.0561
		donor18	42.1207	34.0795	29.1807	17.6445	19.3128	15.1417	49.6507	38.3562	37.255	10.5123	7.73231	10.2319		25.6348	20.9028	17.7607	15.2408	32.2618	28.8826	6.62699	7.97983	7.87412	5.66203	9.49219	16.497			donor18	51.0132	48.5251	49.1538	58.8439	58.7077	54.7645	42.6259	49.0996	46.0395	51.3367	44.0551	41.713
		donor19	212.673	212.107	222.989	70.7195	47.9292	43.6423							Exp4			161.826	228.448											donor19
		donor20	112.19	107.064	108.24	37.2676	25.5824	25.5017										79.7142	90.6708											donor20
		donor21	28.4842	28.6623	30.6916	3.90735	2.04323	2.42771										26.4866	42.9454											donor21
		donor22	127.894	134.446	135.618	47.9531	31.1887	27.0991										97.2387	149.294											donor22
		donor23	92.7609	87.0826	88.1768	20.6197	18.3326	19.4219										69.882	105.746											donor23
		donor24	116.95	109.749	103.862	32.1965	25.1754	25.0272										82.7208	116.254											donor24
	1%1day	donor1	39.9548	40.0699	41.6675				99.203	90.1303	88.0168	16.8031	19.0868	20.1726	Statistical comparison - 21% vs 1%1day														1%1day	donor1	82.0025	80.7709	80.2094	82.3645	84.0299	86.6853	98.2694	100.486	103.626	102.028	99.4326	99.0569
		donor2	50.2415	48.0684	45.5645				84.3309	87.6344	88.5642	27.209	29.0331	27.9697	Wilcoxon matched-pairs signed rank test	Basal respiration		ATP production		Max respiration		SRC		Proton leak		Non mito acid				donor2	114.435	114.636	115.994	117.786	122.911	124.255	140.319	137.444	136.617	140.127	132.06	128.979
		donor3	130.344	126.159	128.417				384.885	482.023	489.558	10.1271	33.7759	35.7858	P value	<0.0001		0.001		0.0139		0.0067		0.5625		0.1964				donor3	131.028	132.415	134.451	150.127	159.679	168.278	175.108	174.765	174.245	166.104	156.555	154.787
		donor4	71.2146	72.2776	74.4004				180.563	189.328	189.076	22.5259	24.8108	25.5788	Exact or approximate P value?	Exact		Exact		Exact		Exact		Exact		Exact				donor4	99.9833	98.9946	98.7035	109.891	107.405	110.261	135.563	140.044	139.242	142.219	137.081	133.493
		donor5	68.4241	69.4802	73.8503				155.57	164.852	159.42	25.4573	27.912	28.1215	P value summary	****		***		*		**		ns		ns				donor5	86.1333	84.042	83.8499	86.4866	87.4869	89.0436	117.645	122.737	123.941	122.047	120.793	119.867
		donor6	63.4544	59.4874	60.2929				138.24	144.73	137.11	19.585	24.0438	25.0465	Significantly different (P < 0.05)?	Yes		Yes		Yes		Yes		No		No				donor6	109.613	109.243	108.824	111.609	112.017	112.885	139.984	140.286	138.836	136.146	129.945	128.32
		donor7	105.844	101.204	97.9737				213.071	236.418	242.055	39.4396	35.6853	35.6823	One- or two-tailed P value?	Two-tailed		Two-tailed		Two-tailed		Two-tailed		Two-tailed		Two-tailed				donor7	131.291	129.253	127.462	141.521	139.702	134.385	145.538	141.343	138.538	143.949	138.655	134.472
		donor8	66.0968	63.9694	62.4866				164.762	183.563	182.455	34.278	27.9245	24.0304	Sum of positive, negative ranks	285.0 , -15.00		77.00 , -1.000		141.0 , -30.00		106.0 , -14.00		7.000 , -14.00		116.0 , -55.00				donor8	114.514	117.438	118.293	135.233	131.691	126.656	118.161	114.832	111.276	140.926	134.725	131.568
		donor9	53.0367	48.3962	45.8979				67.649	68.4873	70.3111	21.2547	19.434	18.7417	Sum of signed ranks (W)	270		76		111		92		-7		61				donor9	102.89	102.23	101.159	106.909	106.792	102.95	107.115	101.1	98.3815	99.0603	96.9363	94.9449
		donor10	48.5309	47.3571	42.8813				95.9898	103.298	110.982	22.4921	21.7907	21.3977	Number of pairs	24		12		18		15		6		18				donor10	116.445	117.526	120.069	123.894	129.733	127.343	136.531	132.661	129.555	136.008	131.664	128.341
		donor11	137.139	129.959	127.721				287.541	342.681	380.438	46.5133	49.2107	48.169	Number of ties (ignored)	0		0		0		0		0		0				donor11	161.519	156.618	155.29	155.568	151.112	147.381	178.712	160.829	155.717	171.741	153.799	149.897
		donor12	84.8791	81.7416	84.9444				264.891	303.666	335.369	36.8868	37.6965	39.8394																donor12	129.295	128.888	133.57	137.835	128.708	122.341	152.7	146.199	145.424	147.397	140.952	138.906
		donor13	40.6314	36.7651	34.9266	21.3005	20.2167	20.3934	58.2683	55.5587	45.6132	16.3335	8.91941	10.7425																donor13	58.9554	59.3085	60.4552	56.2274	56.8844	51.4611	36.5167	43.3595	39.4169	75.697	63.8376	49.9163
		donor14	89.6734	84.3549	86.0746	31.8819	32.315	26.3574	108.763	110.487	104.5	66.0084	24.8159	23.307																donor14	72.7839	73.5225	77.591	68.125	74.1544	66.6893	46.8205	47.9365	48.1711	101.656	94.1232	94.8674
		donor15	74.0505	67.1347	66.1605	41.1733	35.0783	34.3787	128.445	102.01	107.892	83.9446	25.7633	24.8376																donor15	75.3252	75.7089	76.3584	91.2811	89.9384	83.1605	62.3614	61.2409	59.6759	113.46	103.157	92.4172
		donor16	105.672	96.7124	95.8293	43.5252	40.8112	44.9684	217.749	285.617	221.817	114.042	39.9454	33.3045																donor16	76.9299	79.1465	80.356	80.6334	79.0879	81.8913	60.7151	75.3315	70.1753	77.4874	77.9581	70.7474
		donor17	76.3837	77.1367	75.2273	80.1461	63.8779	51.6975	166.492	183.407	178.281	109.814	25.0239	25.7502																donor17	68.6753	75.778	76.8282	87.1812	82.3712	86.5873	63.8503	71.0408	72.9195	86.175	81.8812	71.0774
		donor18	41.1328	36.4243	34.6424	24.8621	23.8022	17.8128	47.7715	45.6401	42.7274	23.733	11.6826	14.0755																donor18	47.1059	45.6458	46.0721	60.1565	60.123	57.1191	45.2985	46.4039	45.2189	71.1737	66.3239	63.1868
		donor19	251.899	259.633	298.476	40.6956	44.2097	39.7578																						donor19
		donor20	128.498	124.907	125.814	47.632	30.2876	29.2867																						donor20
		donor21	56.1389	55.4049	55.8553	14.4776	11.6123	12.473																						donor21
		donor22	165.429	176.946	182.365	25.9834	25.1051	25.768																						donor22
		donor23	137.705	132.378	132.708	31.7447	28.1368	25.6711																						donor23
		donor24	149.167	143.611	143.801	32.6431	27.5611	27.6119																						donor24
			*outlier	Each row in a different n derived from the median of at least 5 technical replicates
			Oligomycin stock used with donors 1-12 was off
			Donors 19-24 were assayed only assayed in media in glucose and followed by addition of oligomycin

## Sheet: Fig 4F
mitotracker				TMRM
PC025d	Sample:	Mitotracker Deep red MFI			Sample:	TMRM MFI
act1n1	151 1.fcs	151973		act1n1	151 1.fcs	473000
21% n1	151 21.fcs	152450		21% n1	151 21.fcs	420000
act1n2	152 1.fcs	151023		act1n2	152 1.fcs	459000
21% n2	152 21.fcs	154375		21% n2	152 21.fcs	445000
act1n3	153 1.fcs	619000		act1n3	153 1.fcs	382541
21%n3	153 21.fcs	375897		21%n3	153 21.fcs	211325			Shapiro-Wilk test	Mitotracker	TMRM
act1n4	154 1.fcs	141400		act1n4	154 1.fcs	381229			W	0.9555	0.8967
21%n4	154 21.fcs	170144		21%n4	154 21.fcs	397270			P value	0.7182	0.1438
act1n5	155 1.fcs	166970		act1n5	155 1.fcs	256916			Passed normality test (alpha=0.05)?	Yes	Yes
21%n5	155 21.fcs	175569		21%n5	155 21.fcs	351072			P value summary	ns	ns
act1n6	156 1.fcs	104050		act1n6	156 1.fcs	368360
21%n6	156 21.fcs	114282		21%n6	156 21.fcs	324419			One sample t test vs 1	Mitotracker	TMRM
									t, df	t=2.346, df=11	t=2.354, df=11
PC025f	Sample:	Mitotracker Deep red MFI		PC025f	Sample:	TMRM MFI			P value (two tailed)	0.0388	0.0382
21% n7	A1 Well_001.fcs	358545		21 n1	D1 Well_029.fcs	39766			P value summary	*	*
21% n8	A2 Well_002.fcs	385493		21 n2	D2 Well_030.fcs	40506			Significant (alpha=0.05)?	Yes	Yes
21% n9	A3 Well_003.fcs	549000		21 n3	D3 Well_031.fcs	66429
21% n10	A4 Well_004.fcs	499000		21 n4	D4 Well_032.fcs	77123
21% n11	A5 Well_005.fcs	501000		21 n5	D5 Well_033.fcs	41261
21% n12	A6 Well_006.fcs	394091		21 n6	D6 Well_034.fcs	52001
act1 n7	A7 Well_007.fcs	460000		act1 n1	D7 Well_035.fcs	74527
act1 n8	A8 Well_008.fcs	453000		act1 n2	D8 Well_036.fcs	70689
act1 n9	A9 Well_009.fcs	706000		act1 n3	D9 Well_037.fcs	55150
act1 n10	A10 Well_010.fcs	669000		act1 n4	D10 Well_038.fcs	90410
act1 n11	A11 Well_011.fcs	568000		act1 n5	D11 Well_039.fcs	89848
act1 n12	A12 Well_012.fcs	588000		act1 n6	D12 Well_040.fcs	61851
		norm to 21% CT				norm to 21% CT
		Mitotracker				TMRM
		0.996871				1.12619
		0.978287				1.03146
		1.64673				1.8102
		0.831061				0.959622
		0.951022				0.731804
		0.910467				1.13545
		1.28296				1.87414
		1.17512				1.74515
		1.28597				0.83021
		1.34068				1.17228
		1.13373				2.17755
		1.49204				1.18942

## Sheet: Fig 4G and I
	Pos filter	Neg filter
Sample_type	n1 21%	n2 21%	n3 21%	n4 21%	n1 1%1day	n2 1%1day	n3 1%1day	n4 1%1day	Sample_type	Fold change	(-log10 p-value)	Sample_type	1%1d/21% n1	1%1d/21% n2	1%1d/21% n3	1%1d/21% n4	MEDIAN
Oleoylcarnitine (C18:1)	19781	15709	23337		54853	42525	65399		Oleoylcarnitine (C18:1)	2.76705	1.80166	Oleoylcarnitine (C18:1)	2.77301	2.70705	2.80237		2.77301
Lauroylcarnitine	3948	3133	2819		8217	10242	8765		Lauroylcarnitine	2.7499	1.70391	Lauroylcarnitine	2.08131	3.26907	3.10926		3.10926
5-Methylthioadenosine (MTA)		3032608	1615315	3375177		2330340	1207170	2857751	5-Methylthioadenosine (MTA)	0.797106	1.61759	5-Methylthioadenosine (MTA)		0.768428	0.747328	0.846697	0.768428
Methionine	11817	9517	8846	8988	3556	6131	4171	5855	Methionine	0.503294	1.58532	Methionine	0.300922	0.644216	0.471513	0.651424	0.557864
Myristoylcarnitine (C14:0)	22039	26537	31160	20180	43498	50574	51866	23571	Myristoylcarnitine (C14:0)	1.69652	1.46003	Myristoylcarnitine (C14:0)	1.97368	1.90579	1.66451	1.16804	1.78515
Palmitoylcarnitine (C16:0)	33478	34858	40575	24812	79693	74402	84404	29565	Palmitoylcarnitine (C16:0)	2.00462	1.39075	Palmitoylcarnitine (C16:0)	2.38046	2.13443	2.0802	1.19156	2.10731
Aspartate		1196594	633084	1349223		937295	574994	1102669	Aspartate	0.822598	0.992296	Aspartate		0.783302	0.908243	0.817262	0.817262
Glutamine	3603	1846	1803	1894	798	1263	1392	1059	Glutamine	0.49333	0.891382	Glutamine	0.221482	0.684182	0.772047	0.559134	0.621658
Glucose (as Hexose)	1319	267	358	851			285	643	Glucose (as Hexose)	0.664043	0.544971	Glucose (as Hexose)			0.796089	0.755582	0.775836
Glutamate	168531	121285	174305	135704	158668	201702	203952	89972	Glutamate	1.09081	0.187397	Glutamate	0.941477	1.66304	1.17009	0.663002	1.05578
Succinate	37223	13512	14820	32936	11352	29997	22934	18933	Succinate	0.84491	0.141515	Succinate	0.304973	2.22003	1.5475	0.574842	1.06117
S-Adenosylhomocysteine (SAH)	5813	6264	5227	5217	3253	6985	6939	4277	S-Adenosylhomocysteine (SAH)	0.952622	0.0996105	S-Adenosylhomocysteine (SAH)	0.559608	1.1151	1.32753	0.81982	0.967461
Figure 4G												Figure 4I
	Lauroylcarnitine	Myristoylcarnitine (C14:0)	Palmitoylcarnitine (C16:0)	Oleoylcarnitine (C18:1)	Glutamine	Glucose	Glutamate	Hexanoylcarnitine (C6:0)	Succinate	Aspartate			SAH	MTA	Methionine
	2.081	1.974	2.38	2.773	0.221		0.941	0.44	0.305	0.253			0.56	0.28*	0.301
	3.269	1.906	2.134	2.707	0.684		1.663	1.137	2.22	0.783			1.115	0.768	0.644
	3.109	1.665	2.08	2.802	0.772	0.796	1.17	1.039	1.548	0.908			1.328	0.747	0.472
		1.168	1.192	1.325	0.559	0.756	0.663	1.263	0.575	0.817			0.82	0.847	0.651
One sample t test												One sample t test
t, df	t=4.889, df=2	t=3.716, df=3	t=3.643, df=3	t=3.900, df=3	t=3.649, df=3	t=11.20, df=1	t=0.5161, df=3	t=0.1658, df=3	t=0.3663, df=3	t=2.091, df=3		t, df	t=0.2633, df=3	t=6.986, df=2	t=5.816, df=3
P value (two tailed)	0.0394	0.0339	0.0357	0.0299	0.0355	0.0567	0.6414	0.8789	0.7385	0.1276		P value (two tailed)	0.8094	0.0199	0.0101
P value summary	*	*	*	*	*	ns	ns	ns	ns	ns		P value summary	ns	*	*
Significant (alpha=0.05)?	Yes	Yes	Yes	Yes	Yes	No	No	No	No	No		Significant (alpha=0.05)?	No	Yes	Yes

## Sheet: Fig 4H
		H3K4me3 21	H3K4me3 1	H3K9Ac 21	H3K9Ac 1	H3K27me3 21	H3K27me3 1	H3K9me2 21	H3K9me2 1	H3K27Ac 21	H3K27Ac 1
	Donor1	70.1	43.9	64.1	35.6	53.8	28.2	4.08	17.5	65.6	43.5
	Donor2	51.6	42.4	41.9	33	35.6	27.4	11.9	24.8	47.8	46.1
	Donor3	40	39.5	29.9	28.3	21.9	19.9	12.7	21.6	42.3	43.8
	Donor4	35.3	30	26	21.2	21.1	16.6	14.7	22.2	29.6	33.4
	Donor5	46.4	37.9	35.8	29.4	27.3	23.5	12.1	19.1	46.2	42.3
Exp1	Donor6	56.9	55.9	49.2	45.9	41.1	38.9	15	25.1	55.5	54.7
exp2	Donor7	60.2	48.4	51.9	40	44.5	32.4	10.2	23.4	64.1	53.4
	Donor8	68	36.1	65.2	27	51.5	24.1	12.6	21.2	85.9	46.4
	Donor9	81.6	74.6	82	70.6	74.7	63	2.84	5.63	72.2	74.1
	Donor10	67.8	47.9	63	42.1	50.6	36.6	11.9	14.1	71.2	51.2
	Donor11	79.1	64.5	70.3	59.7	62.1	53.3	1.28	7.27	80.1	71.2
	Donor12	64.7	55.7	50.4	47.2	39.7	38.8	11.2	17.1	70.4	64.1
	Shapiro-Wilk test
	W	0.9643	0.9546	0.9703	0.936	0.9681	0.9182	0.8215	0.879	0.965	0.9298
	P value	0.8431	0.7042	0.9137	0.4477	0.89	0.2714	0.0166	0.0852	0.8527	0.3779
	Passed normality test (alpha=0.05)?	Yes	Yes	Yes	Yes	Yes	Yes	No	Yes	Yes	Yes
	P value summary	ns	ns	ns	ns	ns	ns	*	ns	ns	ns
	Wilcoxon matched-pairs signed rank test
	P value	0.0005		0.0005		0.0005		0.0005		0.0269
	Exact or approximate P value?	Exact		Exact		Exact		Exact		Exact
	P value summary	***		***		***		***		*
	Significantly different (P < 0.05)?	Yes		Yes		Yes		Yes		Yes
	One- or two-tailed P value?	Two-tailed		Two-tailed		Two-tailed		Two-tailed		Two-tailed
	Sum of positive, negative ranks	0.000 , -78.00		0.000 , -78.00		0.000 , -78.00		78.00 , 0.000		11.00 , -67.00
	Sum of signed ranks (W)	-78		-78		-78		78		-56
	Number of pairs	12		12		12		12		12
	Number of ties (ignored)	0		0		0		0		0
