# Supplementary material for: Oxygen levels at the time of activation determine T cell persistence and immunotherapeutic efficacy
Source: eLife journal article supplement (doi:10.7554/elife.84280), 2023-05-11
Supplement: fig4-figsupp1-data1 [file Figure 4 - figure supplement 1 - Source data 1.xlsx]

## Sheet: Fig 4 - Fig S1A
	days after activation	21				5				1
	1	0.2642	0.25734	0.25352	0.2431	0.26118	0.2895	0.22496	0.24922	0.29828	0.2615	0.26716	0.23584	x106
	2	0.32114	0.34196	0.31028	0.34598	0.3688	0.2827	0.32588	0.2915	0.31436	0.26656	0.28862	0.24734
	3	0.43684	0.4657	0.2718	0.41226	0.29676	0.28042	0.26156	0.25024	0.1991	0.20108	0.16096	0.12646
	4	0.74828	0.91776	0.67812	0.92684	0.25456	0.2786	0.26308	0.22084	0.0942	0.17148	0.11552	0.07912
		Dunnett's multiple comparisons test	Mean Diff.	95.00% CI of diff.	Below threshold?	Summary	Adjusted P Value
		Day 1
		21 vs. 5	-0.001675	-0.05014 to 0.04679	No	ns	0.9871
		21 vs. 1	-0.01116	-0.04501 to 0.02270	No	ns	0.4393
		Day 2
		21 vs. 5	0.01262	-0.08942 to 0.1147	No	ns	0.8558
		21 vs. 1	0.05062	-0.03351 to 0.1347	No	ns	0.1634
		Day 3
		21 vs. 5	0.1244	-0.02701 to 0.2758	No	ns	0.0814
		21 vs. 1	0.2248	0.07309 to 0.3764	Yes	*	0.0174
		Day 4
		21 vs. 5	0.5635	0.3067 to 0.8203	Yes	**	0.0057
		21 vs. 1	0.7027	0.4661 to 0.9392	Yes	**	0.0024

## Sheet: Fig 4 - Fig S1B
	CD45RO MFI							CCR7 MFI							TBET MFI							PD1 MFI
days in 1%	0	1	0	3	0	7		0	1	0	3	0	7		0	1	0	3	0	7		0	1	0	3	0	7
PC041d					38360	42334						10506	20163						15230	17026						7649	11078
					45077	49729						12598	26457						14538	17343						6914	12241
					46455	49496						11204	22928						14677	17388						6765	15563
					40032	49527						13541	17022						18230	21579						7344	18670
					18848	23709						7726	18007													5146	6943
					24622	27324						18672	31751													5332	8451
					24673	27539						16737	28285													5064	11446
					25075	23818						19748	35310													6404	12303
																										1171	5473
																										3087	5609
																											4935
PC046d	15065	15491						2012	1944																	7140	7035
	17737	19807						2516	2235																	6689	7348
	20424	20327						2959	2545																	5981	7436
	31565	30743						2441	2636
PC046f	17286	15277	14416	16004				1615	1387	1641	1894
	12786	10870	10796	11936				2639	3109	1699	1237
PC046g	14250	14383						2650	2951
	13023	13357	10530	20232				2283	2152	1924	2144
	10179	10895	12268	13114				2387	2210	2368	1976
LK001	10225	11715	10225	12219				15239	11699	15239	15921
	9299	12823	9299	13280				13235	17970	13235	14947
	10811	14330	10811	16427				7438	9079	7438	12044
	9498	12307	9498	15608				6106	8517	6106	13891
	11273	12152	11273	14007
	7033	8807	7033	7352
	10284	13286	10284	9647
	7607	7981	7607	9716
PC072b	36156	35606													5350	5854						15942	13632
	43746	50731													6851	10426						19823	20183
	49492	50262													8153	19065						12668	7706
	46528	41388													3400	3799						16521	17430
	38209	36941													3909	5307						17745	11810
	36267	41261													2869	4002						19586	13276
PC072c	9470	10087						739	709			739	1067
	7817	8524						825	638			825	644
	11377	12325						231	411			231	194
	9577	9513						368	342			368	245
	8373	9751						245	317			245	231
	9449	9839						179	242			179	120
PC072d	35715	25772						17327	10547
	22560	26166						13198	11047
	35172	41261						16326	9240
	14805	20798						9785	12019
	26486	27805						10276	8778
	18393	32285						12231	11438
PC076c								12089	9536	12089	12089	12089	14459		2033	2307	2033	2382	2033	2920		6870	7556	6870	7793	6870	12557
								9814	9481	9814	9956	9814	11472		1829	2124	1829	2246	1829	3126		7793	9214	7793	8980	7793	14332
								6986	6738	6986	8176	6986	9618		2098	2833	2098	1851	2098	2533		8039	7663	8039	6663	8039	12520
								13472	14631	13472	14164	13472	17587		2029	2187	2029	2208	2029	3435		8580	9481	8580	9293	8580	19180
PC076d								9188	9785	9188	10013	9188	11742		2198	2048	2198	1887	2198	3306		6851	6116	6851	6016	6851	9618
								9006	9646	9006	10577	9006	9109		2241	2370	2241	2252	2241	3889		12019	11708	12019	10247	12019	20243
								7663	8130	7663	8803	7663	10336		2394	2324	2394	2540	2394	3673		9057	7492	9057	6986	9057	14937
								7164	9347	7164	11674	7164	12411		2124	2098	2124	1999	2124	4297		8778	8753	8778	10158	8778	20183
	CD45RO relative MFI							CCR7 relative MFI							TBET relative MFI							PD1 relative MFI
days in 1%	1	3	7					1	3	7					1	3	7					1	3	7
PC041d	#DIV/0!	#DIV/0!	1.1036				PC041d	#DIV/0!	#DIV/0!	1.91919				PC041d	#DIV/0!	#DIV/0!	1.11793				PC041d	#DIV/0!	#DIV/0!	1.44829
	#DIV/0!	#DIV/0!	1.1032					#DIV/0!	#DIV/0!	2.1001					#DIV/0!	#DIV/0!	1.19294					#DIV/0!	#DIV/0!	1.77047
	#DIV/0!	#DIV/0!	1.06546					#DIV/0!	#DIV/0!	2.04641					#DIV/0!	#DIV/0!	1.18471					#DIV/0!	#DIV/0!	2.30052
	#DIV/0!	#DIV/0!	1.23719					#DIV/0!	#DIV/0!	1.25707					#DIV/0!	#DIV/0!	1.18371					#DIV/0!	#DIV/0!	2.54221
			1.25791							2.3307							#DIV/0!							1.3492
			1.10974							1.70046							#DIV/0!							1.58496
			1.11616							1.68997							#DIV/0!							2.26027
			0.94987							1.78803							#DIV/0!							1.92114
			#DIV/0!							#DIV/0!							#DIV/0!							4.67378
			#DIV/0!							#DIV/0!							#DIV/0!							1.81697
																								0.985294
																								1.09852
																								1.24327
PC046d	1.02828	#DIV/0!	#DIV/0!				PC046d	0.966203	#DIV/0!	#DIV/0!				PC046d	#DIV/0!	#DIV/0!	#DIV/0!				PC046d	#DIV/0!	#DIV/0!
	1.11671	#DIV/0!	#DIV/0!					0.888315	#DIV/0!	#DIV/0!					#DIV/0!	#DIV/0!	#DIV/0!					#DIV/0!	#DIV/0!	#DIV/0!
	0.995251	#DIV/0!	#DIV/0!					0.860088	#DIV/0!	#DIV/0!					#DIV/0!	#DIV/0!	#DIV/0!					#DIV/0!	#DIV/0!
	0.973958	#DIV/0!	#DIV/0!					1.07989	#DIV/0!	#DIV/0!					#DIV/0!	#DIV/0!	#DIV/0!					#DIV/0!	#DIV/0!	#DIV/0!
	#DIV/0!	#DIV/0!	#DIV/0!					#DIV/0!	#DIV/0!	#DIV/0!					#DIV/0!	#DIV/0!	#DIV/0!					#DIV/0!	#DIV/0!	#DIV/0!
PC046f	0.883779	1.11016	#DIV/0!				PC046f	0.858824	1.15417	#DIV/0!				PC046f	#DIV/0!	#DIV/0!	#DIV/0!				PC046f	#DIV/0!	#DIV/0!	#DIV/0!
	0.850149	1.10559	#DIV/0!					1.1781	0.728075	#DIV/0!					#DIV/0!	#DIV/0!	#DIV/0!					#DIV/0!	#DIV/0!	#DIV/0!
	#DIV/0!	#DIV/0!	#DIV/0!					#DIV/0!	#DIV/0!	#DIV/0!					#DIV/0!	#DIV/0!	#DIV/0!					#DIV/0!	#DIV/0!	#DIV/0!
PC046g	1.00933	#DIV/0!	#DIV/0!				PC046g	1.11358	#DIV/0!	#DIV/0!				PC046g	#DIV/0!	#DIV/0!	#DIV/0!				PC046g	#DIV/0!	#DIV/0!	#DIV/0!
	1.02565	1.92137	#DIV/0!					0.942619	1.11435	#DIV/0!					#DIV/0!	#DIV/0!	#DIV/0!					#DIV/0!	#DIV/0!	#DIV/0!
	1.07034	1.06896	#DIV/0!					0.925848	0.834459	#DIV/0!					#DIV/0!	#DIV/0!	#DIV/0!					#DIV/0!	#DIV/0!	#DIV/0!
	#DIV/0!	#DIV/0!	#DIV/0!					#DIV/0!	#DIV/0!	#DIV/0!					#DIV/0!	#DIV/0!	#DIV/0!					#DIV/0!	#DIV/0!	#DIV/0!
LK001	1.14572	1.19501	#DIV/0!				LK001	0.767701	1.04475	#DIV/0!				LK001			#DIV/0!				LK001	#DIV/0!	#DIV/0!	#DIV/0!
	1.37897	1.42811	#DIV/0!					1.35776	1.12935	#DIV/0!							#DIV/0!					#DIV/0!	#DIV/0!	#DIV/0!
	1.3255	1.51947	#DIV/0!					1.22062	1.61925	#DIV/0!							#DIV/0!					#DIV/0!	#DIV/0!	#DIV/0!
	1.29575	1.64329	#DIV/0!					1.39486	2.27498	#DIV/0!							#DIV/0!					#DIV/0!	#DIV/0!	#DIV/0!
	1.07797	1.24253	#DIV/0!					#DIV/0!	#DIV/0!	#DIV/0!							#DIV/0!					#DIV/0!	#DIV/0!	#DIV/0!
	1.25224	1.04536	#DIV/0!					#DIV/0!	#DIV/0!	#DIV/0!							#DIV/0!					#DIV/0!	#DIV/0!	#DIV/0!
	1.29191	0.938059	#DIV/0!					#DIV/0!	#DIV/0!	#DIV/0!							#DIV/0!					#DIV/0!	#DIV/0!	#DIV/0!
	1.04917	1.27724	#DIV/0!					#DIV/0!	#DIV/0!	#DIV/0!							#DIV/0!					#DIV/0!	#DIV/0!	#DIV/0!
	#DIV/0!	#DIV/0!	#DIV/0!					#DIV/0!	#DIV/0!	#DIV/0!					#DIV/0!	#DIV/0!	#DIV/0!					#DIV/0!	#DIV/0!	#DIV/0!
PC072b	0.984788	#DIV/0!	#DIV/0!				PC072b	#DIV/0!	#DIV/0!	#DIV/0!				PC072b	1.09421	#DIV/0!	#DIV/0!				PC072b	0.8551	#DIV/0!	#DIV/0!
	1.15967	#DIV/0!	#DIV/0!					#DIV/0!	#DIV/0!	#DIV/0!					1.52182	#DIV/0!	#DIV/0!					1.01816	#DIV/0!	#DIV/0!
	1.01556	#DIV/0!	#DIV/0!					#DIV/0!	#DIV/0!	#DIV/0!					2.3384	#DIV/0!	#DIV/0!					0.608304	#DIV/0!	#DIV/0!
	0.889529	#DIV/0!	#DIV/0!					#DIV/0!	#DIV/0!	#DIV/0!					1.11735	#DIV/0!	#DIV/0!					1.05502	#DIV/0!	#DIV/0!
	0.966814	#DIV/0!	#DIV/0!					#DIV/0!	#DIV/0!	#DIV/0!					1.35764	#DIV/0!	#DIV/0!					0.66554	#DIV/0!	#DIV/0!
	1.1377	#DIV/0!	#DIV/0!					#DIV/0!	#DIV/0!	#DIV/0!					1.39491	#DIV/0!	#DIV/0!					0.677831	#DIV/0!	#DIV/0!
	#DIV/0!	#DIV/0!	#DIV/0!					#DIV/0!	#DIV/0!	#DIV/0!					#DIV/0!	#DIV/0!	#DIV/0!					#DIV/0!	#DIV/0!	#DIV/0!
PC072c	1.06515	#DIV/0!	#DIV/0!				PC072c	0.959405	#DIV/0!	1.44384				PC072c	#DIV/0!	#DIV/0!	#DIV/0!				PC072c	#DIV/0!	#DIV/0!	#DIV/0!
	1.09044	#DIV/0!	#DIV/0!					0.773333	#DIV/0!	0.780606					#DIV/0!	#DIV/0!	#DIV/0!					#DIV/0!	#DIV/0!	#DIV/0!
	1.08333	#DIV/0!	#DIV/0!					1.77922	#DIV/0!	0.839827					#DIV/0!	#DIV/0!	#DIV/0!					#DIV/0!	#DIV/0!	#DIV/0!
	0.993317	#DIV/0!	#DIV/0!					0.929348	#DIV/0!	0.665761					#DIV/0!	#DIV/0!	#DIV/0!					#DIV/0!	#DIV/0!	#DIV/0!
	1.16458	#DIV/0!	#DIV/0!					1.29388	#DIV/0!	0.942857					#DIV/0!	#DIV/0!	#DIV/0!					#DIV/0!	#DIV/0!	#DIV/0!
	1.04127	#DIV/0!	#DIV/0!					1.35196	#DIV/0!	0.670391					#DIV/0!	#DIV/0!	#DIV/0!					#DIV/0!	#DIV/0!	#DIV/0!
	#DIV/0!	#DIV/0!	#DIV/0!					#DIV/0!	#DIV/0!	#DIV/0!						#DIV/0!	#DIV/0!					#DIV/0!	#DIV/0!	#DIV/0!
PC072d	0.721602	#DIV/0!	#DIV/0!				PC072d	0.608703	#DIV/0!	#DIV/0!				PC072d		#DIV/0!	#DIV/0!				PC072d	#DIV/0!	#DIV/0!	#DIV/0!
	1.15984	#DIV/0!	#DIV/0!					0.837021	#DIV/0!	#DIV/0!						#DIV/0!	#DIV/0!					#DIV/0!	#DIV/0!	#DIV/0!
	1.17312	#DIV/0!	#DIV/0!					0.565968	#DIV/0!	#DIV/0!						#DIV/0!	#DIV/0!					#DIV/0!	#DIV/0!	#DIV/0!
	1.4048	#DIV/0!	#DIV/0!					1.22831	#DIV/0!	#DIV/0!						#DIV/0!	#DIV/0!					#DIV/0!	#DIV/0!	#DIV/0!
	1.0498	#DIV/0!	#DIV/0!					0.854223	#DIV/0!	#DIV/0!						#DIV/0!	#DIV/0!					#DIV/0!	#DIV/0!	#DIV/0!
	1.75529	#DIV/0!	#DIV/0!					0.935165	#DIV/0!	#DIV/0!						#DIV/0!	#DIV/0!					#DIV/0!	#DIV/0!	#DIV/0!
	#DIV/0!	#DIV/0!	#DIV/0!					#DIV/0!	#DIV/0!	#DIV/0!					#DIV/0!	#DIV/0!	#DIV/0!					#DIV/0!	#DIV/0!	#DIV/0!
PC076c	#DIV/0!	#DIV/0!	#DIV/0!				PC076c	0.788816	1	1.19605				PC076c	1.13478	1.17167	1.4363				PC076c	1.09985	1.13435	1.8278
	#DIV/0!	#DIV/0!	#DIV/0!					0.966069	1.01447	1.16894					1.16129	1.22799	1.70913					1.18234	1.15232	1.83909
	#DIV/0!	#DIV/0!	#DIV/0!					0.9645	1.17034	1.37675					1.35033	0.882269	1.20734					0.953228	0.828834	1.55741
	#DIV/0!	#DIV/0!	#DIV/0!					1.08603	1.05137	1.30545					1.07787	1.08822	1.69295					1.10501	1.0831	2.23543
	#DIV/0!	#DIV/0!	#DIV/0!					#DIV/0!	#DIV/0!	#DIV/0!					#DIV/0!	#DIV/0!	#DIV/0!					#DIV/0!	#DIV/0!	#DIV/0!
PC076d	#DIV/0!	#DIV/0!	#DIV/0!				PC076d	1.06498	1.08979	1.27797				PC076d	0.931756	0.858508	1.50409				PC076d	0.892716	0.87812	1.40388
	#DIV/0!	#DIV/0!	#DIV/0!					1.07106	1.17444	1.01144					1.05756	1.00491	1.73539					0.974124	0.852567	1.68425
	#DIV/0!	#DIV/0!	#DIV/0!					1.06094	1.14877	1.34882					0.97076	1.06099	1.53425					0.827205	0.771337	1.64922
	#DIV/0!	#DIV/0!	#DIV/0!					1.30472	0.766449	1.73241					0.987759	1.01239	2.02307					0.997152	1.00286	2.29927
Shapiro-Wilk test							Shapiro-Wilk test							Shapiro-Wilk test							Shapiro-Wilk test
W	0.9176	0.9166	0.9071				W	0.9561	0.7491	0.9672				W	0.7403	0.959	0.9059				W	0.9451	0.9031	0.7609
P value	0.0121	0.2587	0.3343				P value	0.2005	0.0006	0.6467				P value	0.001	0.8008	0.1887				P value	0.487	0.308	0.0002
Passed normality test (alpha=0.05)?	No	Yes	Yes				Passed normality test (alpha=0.05)?	Yes	No	Yes				Passed normality test (alpha=0.05)?	No	Yes	Yes				Passed normality test (alpha=0.05)?	Yes	Yes	No
P value summary	*	ns	ns				P value summary	ns	***	ns				P value summary	***	ns	ns				P value summary	ns	ns	***
Wilcoxon Signed Rank Test							Wilcoxon Signed Rank Test							Wilcoxon Signed Rank Test							Wilcoxon Signed Rank Test
Sum of signed ranks (W)	407	74	34				Sum of signed ranks (W)	45	52	189				Sum of signed ranks (W)	91	14	78				Sum of signed ranks (W)	-43	-10	229
Sum of positive ranks	518.5	76	35				Sum of positive ranks	303	86	221				Sum of positive ranks	98	25	78				Sum of positive ranks	31	13	230
Sum of negative ranks	-111.5	-2	-1				Sum of negative ranks	-258	-34	-32				Sum of negative ranks	-7	-11	0				Sum of negative ranks	-74	-23	-1
P value (two tailed)	0.0005	0.0015	0.0156				P value (two tailed)	0.6947	0.1514	0.0013				P value (two tailed)	0.0023	0.3828	0.0005				P value (two tailed)	0.19	0.55	<0.001
Exact or estimate?	Exact	Exact	Exact				Exact or estimate?	Exact	Exact	Exact				Exact or estimate?	Exact	Exact	Exact				Exact or estimate?	Exact	Exact	Exact
P value summary	***	**	*				P value summary	ns	ns	**				P value summary	**	ns	***				P value summary	ns	ns	***
Significant (alpha=0.05)?	Yes	Yes	Yes				Significant (alpha=0.05)?	No	No	Yes				Significant (alpha=0.05)?	Yes	No	Yes				Significant (alpha=0.05)?	No	No	Yes

## Sheet: Fig 4 - Fig S1D
	CD62L MFI							CD25 MFI							TOX MFI							GZMB MFI							CD45RO MFI							CCR7 MFI
days in 5%	0	1	0	3	0	7		0	1	0	3	0	7		0	1	0	3	0	7		0	1	0	3	0	7		0	1	0	3	0	7		0	1	0	3	0	7
PC041d					12123	8666						32956	41770						13115	13665						23368	36404						38360	42592						10506	12188
					10953	8353						38758	45947						13720	14230						26202	33221						45077	47283						12598	14955
					10546	7162						39125	43384						14228	13663						20977	35457						46455	44786						11204	13792
					14399	10521						32890	41334						17349	19432						21954	23930						40032	43146						13541	15490
					12336	8090						20887	29651						5522	10087													18848	24716						7726	12275
					15410	9014						29403	32783						6084	8987													24622	25397						18672	19327
					12626	7654						27982	34621						8188	10948													24673	26584						16737	21798
					18195	11481						28167	35690						9383	12456													25075	26059						19748	30392
PC046d	32800	33037						11248	14449																				15065	17327						2012	1751
	26510	25038						12438	12438																				17737	17779						2516	2325
	19301	21310						14961	19576																				20424	19301						2959	2319
	13732	15206						23096	26447																				31565	29873						2441	2463
PC046f	20862	18853	44656	28751				9074	7921	13265	19256																		17286	14961	14416	15135				1615	1507	1641	1645
	10483	9218	8299	8736				13174	8318	23706	13357																		12786	10318	10796	7612				2639	2836	1699	1266
PC046g	19714	15312						25217	19484																				14250	11534						2650	2599
	23763	24046	15746	10821				14086	13575	12046	13512																		13023	14184	10530	15491				2283	2107	1924	2044
	22716	21010	19995	20862				19211	15819	23650	21614																		10179	10747	12268	14720				2387	2025	2368	1798
LK001	7197	7924	7197	8544				6064	5179	6064	6696				4257	3103	4257	3309				29323	36203	29323	28308				10225	11108	10225	12578				15239	14349	15239	12898
	8501	8458	8501	9341				5327	9576	5327	6347				3519	2888	3519	2797				25267	21210	25267	26315				9299	12149	9299	11256				13235	18380	13235	15805
	3150	1832	3150	2320				3526	3083	3526	3182				4906	4872	4906	5510				16065	18986	16065	17201				10811	16029	10811	15335				7438	6287	7438	9362
	3168	2121	3168	3114				3302	2810	3302	3196				4459	4202	4459	5204				15823	16560	15823	12536				9498	13517	9498	17612				6106	6178	6106	9536
								7731		7731	9227				3608		3608	4294				88516		88516	52574				11273		11273	10756
								4162		4162	7374				3282		3282	4981				24551		24551	36143				7033		7033	11376
								5908		5908	6597				5712		5712	5633				55350		55350	37569				10284		10284	9750
								6119		6119	6119				3403		3403	4017				27669		27669	23175				7607		7607	6857
	CD62L relative MFI							CD25 relative MFI							TOX relative MFI							GZMB relative MFI							CD45RO relative MFI							CCR7 relative MFI
	1	3	7					1	3	7					1	3	7					1	3	7					1	3	7					1	3	7
PC041d			0.71484				PC041d			1.26745				PC041d			1.04194				PC041d			1.55786				PC041d			1.11032				PC041d			1.1601
			0.762622							1.18548							1.03717							1.26788							1.04894							1.18709
			0.67912							1.10886							0.96029							1.69028							0.964073							1.23099
			0.730676							1.25673							1.12006							1.09001							1.07779							1.14393
			0.655804							1.41959							1.82669														1.31133							1.58879
			0.584945							1.11495							1.47715														1.03148							1.03508
			0.606209							1.23726							1.33708														1.07745							1.30238
			0.630998							1.26709							1.32751														1.03924							1.53899
PC046d	1.00723						PC046d	1.28458						PC046d							PC046d							PC046d	1.15015						PC046d	0.870278
	0.944474							1																					1.00237							0.924086
	1.10409							1.30847																					0.945016							0.783711
	1.10734							1.14509																					0.946396							1.00901
PC046f	0.903701	0.643833					PC046f	0.872934	1.45164					PC046f							PC046f							PC046f	0.865498	1.04988					PC046f	0.933127	1.00244
	0.879328	1.05266						0.631395	0.563444																				0.806976	0.705076						1.07465	0.745144
PC046g	0.776707						PC046g	0.772653						PC046g							PC046g							PC046g	0.809404						PC046g	0.980755
	1.01191	0.687222						0.963723	1.1217																				1.08915	1.47113						0.922908	1.06237
	0.924899	1.04336						0.823434	0.913911																				1.0558	1.19987						0.848345	0.759291
LK001	1.10101	1.18716					LK001	0.854057	1.10422					LK001	0.728917	0.777308					LK001	1.23463	0.965386					LK001	1.08636	1.23012					LK001	0.941597	0.846381
	0.994942	1.09881						1.79763	1.19148						0.820688	0.794828						0.839435	1.04148						1.30648	1.21045						1.38874	1.19418
	0.581587	0.736508						0.874362	0.902439						0.99307	1.12311						1.18182	1.07071						1.48266	1.41846						0.845254	1.25867
	0.669508	0.982955						0.850999	0.967898						0.942364	1.16708						1.04658	0.792264						1.42314	1.85429						1.01179	1.56174
									1.19351							1.19013							0.593949							0.954138
									1.77174							1.51767							1.47216							1.61752
									1.11662							0.986169							0.678753							0.948075
									1							1.18043							0.83758							0.901407
Shapiro-Wilk test							Shapiro-Wilk test							Shapiro-Wilk test							Shapiro-Wilk test							Shapiro-Wilk test							Shapiro-Wilk test
W	0.9085	0.8828	0.969				W	0.8621	0.9333	0.9131				W	0.9533	0.92	0.9028				W	0.9281	0.9393	0.9533				W	0.9254	0.9708	0.8137				W	0.8051	0.9209	0.8914
P value	0.175	0.2004	0.8898				P value	0.041	0.4164	0.3766				P value	0.7365	0.4299	0.3059				P value	0.5836	0.6041	0.7367				P value	0.2959	0.9186	0.0401				P value	0.0107	0.4765	0.2409
Passed normality test (alpha=0.05)?	Yes	Yes	Yes				Passed normality test (alpha=0.05)?	No	Yes	Yes				Passed normality test (alpha=0.05)?	Yes	Yes	Yes				Passed normality test (alpha=0.05)?	Yes	Yes	Yes				Passed normality test (alpha=0.05)?	Yes	Yes	No				Passed normality test (alpha=0.05)?	No	Yes	Yes
P value summary	ns	ns	ns				P value summary	*	ns	ns				P value summary	ns	ns	ns				P value summary	ns	ns	ns				P value summary	ns	ns	*				P value summary	*	ns	ns
Wilcoxon Signed Rank Test							Wilcoxon Signed Rank Test							Wilcoxon Signed Rank Test							Wilcoxon Signed Rank Test							Wilcoxon Signed Rank Test							Wilcoxon Signed Rank Test
Sum of signed ranks (W)	-33	-8	-36				Sum of signed ranks (W)	-8	36	36				Sum of signed ranks (W)	-10	8	32				Sum of signed ranks (W)	6	-10	10				Sum of signed ranks (W)	29	46	32				Sum of signed ranks (W)	-42	0	36
Sum of positive ranks	29	14	0				Sum of positive ranks	35	51	36				Sum of positive ranks	0	22	34				Sum of positive ranks	8	13	10				Sum of positive ranks	60	62	34				Sum of positive ranks	18	14	36
Sum of negative ranks	-62	-22	-36				Sum of negative ranks	-43	-15	0				Sum of negative ranks	-10	-14	-2				Sum of negative ranks	-2	-23	0				Sum of negative ranks	-31	-16	-2				Sum of negative ranks	-60	-14	0
P value (two tailed)	0.27	0.64	0.008				P value (two tailed)	0.79	0.12	0.008				P value (two tailed)	0.13	0.64	0.02				P value (two tailed)	0.38	0.55	0.13				P value (two tailed)	0.34	0.08	0.02				P value (two tailed)	0.11	>0.99	0.008
Exact or estimate?	Exact	Exact	Exact				Exact or estimate?	Exact	Exact	Exact				Exact or estimate?	Exact	Exact	Exact				Exact or estimate?	Exact	Exact	Exact				Exact or estimate?	Exact	Exact	Exact				Exact or estimate?	Exact	Exact	Exact
P value summary	ns	ns	**				P value summary	ns	ns	**				P value summary	ns	ns	*				P value summary	ns	ns	ns				P value summary	ns	ns	*				P value summary	ns	ns	**
Significant (alpha=0.05)?	No	No	Yes				Significant (alpha=0.05)?	No	No	Yes				Significant (alpha=0.05)?	No	No	Yes				Significant (alpha=0.05)?	No	No	No				Significant (alpha=0.05)?	No	No	Yes				Significant (alpha=0.05)?	No	No	Yes

## Sheet: Fig 4 - Fig S1F
		CD62L					CD45RO					TOX					GZMB					TBET					CCR7					CD25
	days in 5%	0	last 3 days in 5%	0	last 3 days in 1%		0	last 3 days in 5%	0	last 3 days in 1%		0	last 3 days in 5%	0	last 3 days in 1%		0	last 3 days in 5%	0	last 3 days in 1%		0	last 3 days in 5%	0	last 3 days in 1%		0	last 3 days in 5%	0	last 3 days in 1%		0	last 3 days in 5%	0	last 3 days in 1%
	PC046	30891	21768	30891	10459		21160	17531	21160	16230																	2138	1894	2138	1894		9929	10248	9929	11881
		12874	13701	12874	11146		20472	13388	20472	12669																	1600	3837	1600	3109		10970	10294	10970	9014
		27410	20137	27410	12496		11746	7869	11746	7714																	2219	2013	2219	2270		15782	14891	15782	17779
		20472	27939	20472	14686		10156	9599	10156	7479																	3052	3132	3052	2843		21110	18676	21110	15636
	LK001	5611	2415	5611	3013												9475	11181	9475	13619		1158	805	1158	1065		6110	9792	6110	7429		3186	2747	3186	3186
		7585	3853	7585	5166		1082	1009	1082	1126							11638	10785	11638	11773							808	2249	808	2206		1787	2485	1787	2859
		958	834	958	1570		1885	2098	1885	2268							13019	12842	13019	13754		5748	6929	5748	7880		3526	5418	3526	5963		3103	4122	3103	4973
		2997	2198	2997	3454		1802	1533	1802	1712							12187	11728	12187	12306		5070	5668	5070	6597		5564	6008	5564	3451		2556	2691	2556	3278
		873	565	873	747		770	617	770	690							3339	2132	3339	2871		4558	919	4558	831							833	871	833	1000
		507	238	507	636		1342	748	1342	1125							2549	1917	2549	2442												998	582	998	1141
		707	440	707	743		793	596	793	650												5625	3209	5625	2804							950	972	950	1119
		2091	685	2091	644		562	455	562	475							3077	2314	3077	3040		3846	5908	3846	3796		15239	13877	15239	18519		655	658	655	630
		10286	6676	10286	7799							7584	7064	7584	8507		2355	2405	2355	2804												2071	2181	2071	3031
		8321	8321	8321	11395		11587	9661	11587	11729		6827	6646	6827	7640		69173	40245	69173	58809							7438	10528	7438	10334		1659	1852	1659	2374
							12490	9894	12490	10711		7880	7685	7880	8608		102902	57595	102902	39676							6106	9834	6106	7198		1671	1858	1671	2243
		11156	11747	11156	12318		11711	9604	11711	10194							75550	50132	75550	34658
		9038	5521	9038	6383		9561	8570	9561	10567		5276	5184	5276	5590		22183	30274	22183	31718												1797	1985	1797	2411
		7197	8024	7197	7522		10225	11782	10225	15529		4257	3249	4257	3775		29323	30739	29323	41082												6064	8290	6064	12438
		3150	2966	3150	2524		10811	17375	10811	18348		4906	6202	4906	5845		16065	21385	16065	22383												3526	3924	3526	4444
		3168	2268	3168	2313		9498	11975	9498	12256		4459	4585	4459	4107		15823	14555	15823	18371												3302	3768	3302	4038
		2777	2701	2777	1934		11273	15869	11273	13261		3608	3343	3608	3005		88516	174264	88516	146556												7731	7023	7731	5890
		3642	3288	3642	4283		10284	13361	10284	11480		5712	5193	5712	5954		55350	63990	55350	59579												5908	6878	5908	6373
		3351	8838	3351	10038		7607	10678	7607	9479		3403	5863	3403	5828		27669	29585	27669	35865												6119	10179	6119	8814
									52811	39766									20365	26008				2033	2883				12089	11606				8223	4447
									47398	38444									16472	27636				1829	3126				9814	10217				7993	4869
									28577	27220									17905	31892				2098	3222				6986	8532				5543	4218
									43077	34426									16181	23821				2029	3348				13472	10071				9509	4285
		Relative MFI of cells culture for last 3 days in 5%										Relative MFI of cells culture for last 3 days in 5%
		CD25	CD62L	CD45RO	GZMB	TOX	CCR7	TBET				CD25	CD62L	CD45RO	GZMB	TOX	CCR7	TBET
		1.03213	0.704671	0.828497	#DIV/0!	#DIV/0!	0.885875	#DIV/0!				1.1966	0.338578	0.767013	#DIV/0!	#DIV/0!	0.885875	#DIV/0!
		0.938377	1.06424	0.653966	#DIV/0!	#DIV/0!	2.39812	#DIV/0!				0.821696	0.865776	0.618845	#DIV/0!	#DIV/0!	1.94312	#DIV/0!
		#DIV/0!	#DIV/0!	#DIV/0!	#DIV/0!	#DIV/0!	#DIV/0!	#DIV/0!				#DIV/0!	#DIV/0!	#DIV/0!	#DIV/0!	#DIV/0!	#DIV/0!	#DIV/0!
		0.943543	0.734659	0.66993	#DIV/0!	#DIV/0!	0.907165	#DIV/0!				1.12654	0.455892	0.656734	#DIV/0!	#DIV/0!	1.02298	#DIV/0!
		0.884699	1.36474	0.945156	#DIV/0!	#DIV/0!	1.02621	#DIV/0!				0.740692	0.71737	0.736412	#DIV/0!	#DIV/0!	0.93152	#DIV/0!
		#DIV/0!	#DIV/0!	#DIV/0!	#DIV/0!	#DIV/0!	#DIV/0!	#DIV/0!				#DIV/0!	#DIV/0!	#DIV/0!	#DIV/0!	#DIV/0!	#DIV/0!	#DIV/0!
		0.86221	0.430405	#DIV/0!	1.18005	#DIV/0!	1.60262	0.695164				1	0.536981	#DIV/0!	1.43736	#DIV/0!	1.21588	0.919689
		1.3906	0.507976	0.932532	0.926706	#DIV/0!	2.78342	#DIV/0!				1.59989	0.681081	1.04067	1.0116	#DIV/0!	2.7302	#DIV/0!
		1.32839	0.870564	1.113	0.986404	#DIV/0!	1.53659	1.20546				1.60264	1.63883	1.20318	1.05646	#DIV/0!	1.69115	1.37091
		1.05282	0.7334	0.850721	0.962337	#DIV/0!	1.0798	1.11795				1.28247	1.15249	0.950055	1.00976	#DIV/0!	0.620237	1.30118
		1.04562	0.647194	0.801299	0.638515	#DIV/0!	#DIV/0!	0.201624				1.20048	0.85567	0.896104	0.859838	#DIV/0!	#DIV/0!	0.182317
		0.583166	0.469428	0.557377	0.75206	#DIV/0!	#DIV/0!	#DIV/0!				1.14329	1.25444	0.838301	0.958023	#DIV/0!	#DIV/0!	#DIV/0!
		1.02316	0.622348	0.751576	#DIV/0!	#DIV/0!	#DIV/0!	0.570489				1.17789	1.05092	0.819672	#DIV/0!	#DIV/0!	#DIV/0!	0.498489
		1.00458	0.327594	0.809609	0.752031	#DIV/0!	0.910624	1.53614				0.961832	0.307987	0.845196	0.987975	#DIV/0!	1.21524	0.986999
		1.05311	0.649038	#DIV/0!	1.02123	0.931435	#DIV/0!	#DIV/0!				1.46354	0.758215	#DIV/0!	1.19066	1.1217	#DIV/0!	#DIV/0!
		1.11634	1	0.833779	0.581802	0.973488	1.41543	#DIV/0!				1.43098	1.36943	1.01226	0.850173	1.11909	1.38935	#DIV/0!
		1.11191	#DIV/0!	0.792154	0.559707	0.975254	1.61055	#DIV/0!				1.34231	#DIV/0!	0.857566	0.385571	1.09239	1.17884	#DIV/0!
		#DIV/0!	1.05298	0.820084	0.663561	#DIV/0!	#DIV/0!	#DIV/0!				#DIV/0!	1.10416	0.870464	0.458743	#DIV/0!	#DIV/0!	#DIV/0!
		1.10462	0.610865	0.89635	1.36474	0.982563	#DIV/0!	#DIV/0!				1.34168	0.70624	1.10522	1.42983	1.05951	#DIV/0!	#DIV/0!
		1.36708	1.11491	1.15227	1.04829	0.763214	#DIV/0!	#DIV/0!				2.05112	1.04516	1.51873	1.40102	0.886775	#DIV/0!	#DIV/0!
		#DIV/0!	#DIV/0!	#DIV/0!	#DIV/0!	#DIV/0!	#DIV/0!	#DIV/0!				#DIV/0!	#DIV/0!	#DIV/0!	#DIV/0!	#DIV/0!	#DIV/0!	#DIV/0!
		1.11288	0.941587	1.60716	1.33115	1.26417	#DIV/0!	#DIV/0!				1.26035	0.80127	1.69716	1.39328	1.1914	#DIV/0!	#DIV/0!
		1.14113	0.715909	1.26079	0.919863	1.02826	#DIV/0!	#DIV/0!				1.2229	0.730114	1.29038	1.16103	0.921059	#DIV/0!	#DIV/0!
		0.908421	0.972632	1.4077	1.96873	0.926552	#DIV/0!	#DIV/0!				0.761868	0.696435	1.17635	1.6557	0.832871	#DIV/0!	#DIV/0!
		#DIV/0!	#DIV/0!	#DIV/0!	#DIV/0!	#DIV/0!	#DIV/0!	#DIV/0!				#DIV/0!	#DIV/0!	#DIV/0!	#DIV/0!	#DIV/0!	#DIV/0!	#DIV/0!
		1.16418	0.902801	1.2992	1.1561	0.909139	#DIV/0!	#DIV/0!				1.07871	1.176	1.1163	1.0764	1.04237	#DIV/0!	#DIV/0!
		1.66351	2.63742	1.40371	1.06925	1.72289	#DIV/0!	#DIV/0!				1.44043	2.99552	1.24609	1.29622	1.71261	#DIV/0!	#DIV/0!
		#DIV/0!	#DIV/0!	#DIV/0!	#DIV/0!	#DIV/0!	#DIV/0!	#DIV/0!				#DIV/0!	#DIV/0!	#DIV/0!	#DIV/0!	#DIV/0!	#DIV/0!	#DIV/0!
		#DIV/0!	#DIV/0!	#DIV/0!	#DIV/0!	#DIV/0!	#DIV/0!	#DIV/0!				0.5408	#DIV/0!	0.752987	1.27709	#DIV/0!	0.960046	1.4181
		#DIV/0!	#DIV/0!	#DIV/0!	#DIV/0!	#DIV/0!	#DIV/0!	#DIV/0!				0.609158	#DIV/0!	0.811089	1.67776	#DIV/0!	1.04106	1.70913
		#DIV/0!	#DIV/0!	#DIV/0!	#DIV/0!	#DIV/0!	#DIV/0!	#DIV/0!				0.76096	#DIV/0!	0.952514	1.78118	#DIV/0!	1.2213	1.53575
		#DIV/0!	#DIV/0!	#DIV/0!	#DIV/0!	#DIV/0!	#DIV/0!	#DIV/0!				0.450626	#DIV/0!	0.799174	1.47216	#DIV/0!	0.74755	1.65007
	Shapiro-Wilk test										Shapiro-Wilk test
	W	0.9365	0.743	0.9146	0.9039	0.7483	0.8471	0.9745			W	0.9756	0.7876	0.9174	0.9638	0.806	0.8453	0.9068
	P value	0.1675	<0.0001	0.0679	0.0672	0.0034	0.0392	0.9209			P value	0.7687	0.0003	0.0447	0.5695	0.0171	0.0149	0.2595
	Passed normality test (alpha=0.05)?	Yes	No	Yes	Yes	No	No	Yes			Passed normality test (alpha=0.05)?	Yes	No	No	Yes	No	No	Yes
	P value summary	ns	****	ns	ns	**	*	ns			P value summary	ns	***	*	ns	*	*	ns
	Wilcoxon Signed Rank Test										Wilcoxon Signed Rank Test
	Sum of signed ranks (W)	107	-137	-37	-25	-9	42	-5			Sum of signed ranks (W)	127	-81	-61	135	23	56	17
	Sum of positive ranks	180	47	97	73	23	54	8			Sum of positive ranks	226	86	132	194	39	88	36
	Sum of negative ranks	-73	-184	-134	-98	-32	-12	-13			Sum of negative ranks	-99	-167	-193	-59	-16	-32	-19
	P value (two tailed)	0.0854	0.0158	0.5392	0.6095	0.6953	0.0674	0.6875			P value (two tailed)	0.0903	0.1982	0.4261	0.0275	0.2754	0.1205	0.4316
	Exact or estimate?	Exact	Exact	Exact	Exact	Exact	Exact	Exact			Exact or estimate?	Exact	Exact	Exact	Exact	Exact	Exact	Exact
	P value summary	ns	*	ns	ns	ns	ns	ns			P value summary	ns	ns	ns	*	ns	ns	ns
	Significant (alpha=0.05)?	No	Yes	No	No	No	No	No			Significant (alpha=0.05)?	No	No	No	Yes	No	No	No

## Sheet: Fig 4 - Fig S1G
															Additional info:
															Protein ladder: Precision Plus Protein™ Dual Color Standards (Biorad)
															Running buffer: MOPS
															Cut membrane: at 75kDa and 37kDa before incubation with primary and secondary antibodies
															Method od detection: ECL
																relevant bands used in Fig S4G
			n=1					n=2					n=3
			last3d		1day		3days
	%O2	21	5	1	5	1	5	1
		0.303567	2.12416	1.65507	0.332338	0.305648	0.738444	0.524888
		0.129539	2.45958	1.66865	0.191627	0.152582	0.55993	0.246454
		0.184901	2.07905	1.37351	0.195325	0.159122	0.504818	0.49352
Dunn's multiple comparisons test			21 vs. 5	21 vs. 1	21 vs. 5	21 vs. 1	21 vs. 5	21 vs. 1
Rank sum diff.			-17	-14	-5	-1	-11	-8
Significant?			Yes	Yes	No	No	No	No
Summary			**	*	ns	ns	ns	ns
Adjusted P Value			0.0079	0.0489	>0.9999	>0.9999	0.2258	0.7834
A-?			B	C	D	E	F	G
			5	1	5	1	5	1

## Sheet: Fig 4 - Fig S1H
	% CD45RO+CCR7-					MFI of Perforin divided by 1000
	1 media change		5 media changes			1 media change		5 media changes
	21%	1%1d	21%	1%1d		21%	1%1d	21%	1%1d
	22	48.1	24.9	43.8		0.924	1.18	0.998	1.047
	43.7	49	50.8	52.1		1.042	1.285	0.941	1.019
	35.4	63.7	32	47.3		0.824	1.055	0.754	0.893
	51.9	68.7	49.8	61		1.029	1.212	0.934	1.071
	32.5	47.4	36.7	45.3		0.817	1.248	0.769	1.088
	Paired T test					Paired T test
P value	0.0116		0.0212			0.0032		0.0371
P value summary	*		*			**		*
Significantly different (P < 0.05)?	Yes		Yes			Yes		Yes
One- or two-tailed P value?	Two-tailed		Two-tailed			Two-tailed		Two-tailed
t, df	t=4.410, df=4		t=3.679, df=4			t=6.342, df=4		t=3.076, df=4
Number of pairs	5		5			5		5

## Sheet: Fig 4 - Fig S1I
		ECAR - glucose stress test																										OCR - glucose stress test
		baseline			glucose			oligo			2-DG				Baseline		Glycolysis		Glycolytic reserve		Glycolytic capacity		Non glyco acid					baseline			glucose			oligo			2-DG
	Time (min)	1.40452	7.91587	14.4259	21.0135	27.5262	34.041	40.6164	47.134	53.6536	60.2314	66.7526	73.2704		21%O2	1%1day	21%O2	1%1day	21%O2	1%1day	21%O2	1%1day	21%O2	1%1day			Time (min)	1.40452	7.91587	14.4259	21.0135	27.5262	34.041	40.6164	47.134	53.6536	60.2314	66.7526	73.2704
21%O2	donor1	1.92993	1.92018	1.49401	1.64117	0.832417	1.02336				0.629797	0.653742	0.612538	Exp1	1.78137	5.77521	-0.615724	31.8744					0.632026	8.54826		21%O2	donor1	9.99108	5.71621	4.71298	5.57511	7.41846	7.47649				9.80193	9.33101	9.71344
	donor2	12.9693	12.3636	11.7492	47.8674	48.9224	49.1775				17.6103	11.6481	9.20883		12.3607	9.70768	36.2951	23.2271					12.8224	8.15682			donor2	74.4895	62.8783	59.2722	37.9416	32.1353	28.8923				22.2764	23.3503	23.8074
	donor3	1.91892	2.09669	1.94	7.56874	6.52964	6.52478				2.40113	1.56007	1.49312		1.98521	16.6019	4.88918	36.444					1.81811	13.475			donor3	19.3396	16.2566	14.6481	14.638	14.6702	14.7287				14.0474	14.2962	15.1624
	donor4	5.95381	4.29424	5.09375	34.948	37.4199	38.2251				10.4317	7.71718	6.79		5.11393	2.84629	31.7504	11.9091					8.31295	3.32394			donor4	45.966	41.8082	39.8755	30.7599	28.9458	26.5781				25.7993	26.3121	26.0568
	donor5	1.84063	1.57532	1.65238	2.84927	1.93131	1.57749				0.941246	0.648385	0.629911		1.68944	1.35827	0.429916	5.43647					0.739847	1.62026			donor5	14.0494	9.34431	9.04582	7.88049	8.35725	7.91951				6.76047	8.20408	8.37082
	donor6	7.10578	6.85441	6.85783	37.8103	40.8937	42.6852				13.0092	9.0618	8.10226		6.93934	6.79207	33.5237	29.4603					10.0578	8.60722			donor6	63.6268	56.2543	53.1562	33.0218	29.2717	26.9749				20.8273	21.6161	22.7874
	donor7	8.35039	7.82054	7.63016	46.3618	46.3503	45.0297				11.9651	10.4716	9.01005	Exp2	7.9337	15.5068	37.9802	73.5587					10.4823	20.9995			donor7	67.111	59.1049	54.1923	45.1393	40.3733	39.0955				42.4729	40.3037	38.7778
	donor8	85.44868*	87.67542*	87.29879*	113.2274*	109.6017*	108.8176*				53.8396*	41.421*	35.4999*														donor8
	donor9	12.8486	12.3269	11.5964	74.537	70.8889	68.1706				19.7256	14.2835	11.665		12.2573	12.9646	58.9416	70.9068					15.2247	18.9012			donor9	93.9268	83.1342	78.4516	56.4879	48.1369	43.7079				48.3535	45.0686	42.6418
	donor10	10.8376	10.7337	10.894	83.6818	85.7791	85.5329				23.3015	21.6324	18.9919		10.8217	15.9224	74.1762	98.3229					21.3086	25.9334			donor10	105.609	97.8571	95.0847	76.945	60.7636	56.9769				83.9408	79.1637	77.4143
	donor11	5.57531	5.16568	5.01919	40.2017	38.525	37.25				9.81631	6.79081	5.95243		5.25339	28.3298	33.4055	103.103					7.51985	31.3311			donor11	51.2555	43.7293	39.5277	28.3446	23.1725	20.9784				23.669	22.681	20.4555
	donor12	15.031	14.7413	14.2034	83.7081	78.7501	76.8321				22.5643	19.4003	16.6904		14.6585	17.511	65.1049	91.8398					19.5517	23.9161			donor12	128.676	119.518	113.75	82.2593	73.3748	69.0041				85.5807	84.4232	83.4835
	donor13	8.52745	7.91801	7.45233	68.5139	70.3463	69.6291	68.4272	66.1965	65.4897	19.5525	13.653	12.8886	Exp3	7.96593	7.98859	61.5305	70.3431	-2.79201	12.3087	58.7385	82.6518	15.3647	8.17077			donor13	70.3354	65.2217	55.5037	42.7554	31.9999	27.5371	20.9264	21.7193	23.2315	25.7023	27.137	30.1536
	donor14	5.48328	5.23709	4.7854	53.3874	58.3496	62.1877	79.7127	78.6634	84.6212	11.4359	9.35089	9.12022		5.16859	12.6156	52.8063	52.5425	23.0242	17.0061	75.8305	69.5486	9.96899	18.96			donor14	37.5506	40.498	40.9373	67.471	54.6741	52.008	27.5774	27.6588	27.1243	17.5992	18.0024	18.5351
	donor15	10.9934	10.5995	10.1888	79.9607	90.8823	93.9215	103.015	100.854	99.7022	25.5914	19.0523	17.9196		10.5939	14.1492	77.661	75.5809	12.9355	16.4074	90.5965	91.9882	20.8545	14.4456			donor15	81.1014	76.6146	78.5976	138.896	111.244	94.8951	62.1372	48.6872	43.2551	41.3029	37.7127	41.42
	donor16	20.7384	21.1841	20.9715	110.457	96.5977	91.3428	101.577	97.2888	97.8025	27.6633	18.7906	16.6916		20.9646	18.9264	78.5012	59.4034	-0.57634	15.6298	77.9249	75.0331	21.0485	19.5271			donor16	215.113	217.174	236.845	231.443	225.901	226.389	139.105	112.708	103.129	63.9468	60.3351	62.0879
	donor17	6.92903	7.85493	7.74108	59.0006	70.1771	75.105	85.5253	85.6576	89.3899	22.4079	15.0453	13.9024		7.50835	14.7847	60.5859	75.9609	18.7634	16.5264	79.3492	92.4873	17.1185	27.4006			donor17	62.1025	58.9464	55.553	55.26	38.6048	37.8474	28.8527	27.3102	28.7141	26.1849	30.3776	30.089
	donor18	5.85046	6.00183	5.7392	37.5253	49.3579	54.1632	71.3812	71.8166	76.2214	19.941	12.5495	11.5523		5.86383	6.93143	41.1516	36.3921	26.1242	28.9578	67.2759	65.3499	14.6809	14.1481			donor18	67.3119	63.4556	64.5514	69.3198	52.621	50.9611	29.0949	29.0259	30.3147	23.6869	22.655	25.5591
	donor19				77.958	76.6868	74.3849	93.7132	85.7196	89.0355	58.3875	45.4153	40.9456	Exp4					13.1462	21.6984							donor19				149.002	150.918	154.898	77.0623	60.089	53.5934	35.315	36.9228	35.1837
	donor20				80.8716	77.9354	75.5029	85.7635	84.3914	83.1222	38.6825	27.279	23.5073						6.32242	17.0757							donor20				30.3955	30.7729	32.0121	25.9368	19.533	16.9064	13.5486	15.1729	14.0062
	donor21				40.3328	43.9679	38.3741	44.3289	49.5644	50.759	19.8686	15.6982	14.4219						7.32584	12.9672							donor21				10.9447	12.5799	13.2018	10.6066	8.45229	15.4658	12.0605	13.0254	11.3195
	donor22				79.5495	78.1259	74.4332	87.1443	83.0592	86.2291	40.9129	27.7392	23.9235						8.10798	16.1773							donor22				79.1166	77.7969	79.3917	46.33	35.0764	25.0406	26.3828	26.6754	25.9533
	donor23				61.2672	60.3171	57.728	72.878	74.271	74.9667	35.3681	24.9345	21.2772						14.2678	21.7524							donor23				31.5222	31.7491	33.8669	15.7899	14.838	15.9188	26.0873	23.0087	20.5957
	donor24				71.2256	70.674	67.5252	85.0636	82.6069	82.3976	41.3419	28.7895	24.806						13.5478	11.0652							donor24				43.0446	38.5871	27.3043	18.6168	18.897	20.2124	20.0429	16.5319	15.5724
1%1day	donor1	5.78721	5.8614	5.67701	34.2675	38.6085	40.0727				10.9315	7.70054	7.01277	Statistical comparison - 21% vs 1%1day												1%1day	donor1	55.7439	50.1581	47.9338	36.3088	32.2696	31.2011				21.0622	19.5455	20.376
	donor2	10.4355	9.51883	9.16864	31.1471	33.2392	34.418				10.4482	7.68177	6.34052	Wilcoxon matched-pairs signed rank test	Baseline		Glycolysis		Glycolytic reserve		Glycolytic capacity		Non glyco acid				donor2	55.9105	45.8929	41.9079	30.0448	27.876	26.1853				20.1985	20.6991	20.2915
	donor3	17.1519	16.7231	15.9306	51.2858	53.1284	54.7234				17.2	12.5736	10.6515	P value	0.015		0.0797		0.0161		0.8438		0.1594				donor3	86.1644	75.9733	73.349	53.421	49.6665	46.2261				27.8995	28.3763	29.8499
	donor4	2.7754	2.90538	2.85809	14.1959	14.6993	15.3709				4.17596	3.04143	2.75444	Exact or approximate P value?	Exact		Exact		Exact		Exact		Exact				donor4	31.7169	25.1314	22.9282	19.4814	17.4278	16.6808				13.3839	14.387	13.605
	donor5	1.14446	1.31357	1.61677	6.98224	6.45808	6.9439				2.18357	1.36328	1.31392	P value summary	*		ns		*		ns		ns				donor5	27.0929	23.3821	18.222	16.8604	15.8791	14.8954				25.4524	29.0873	29.2182
	donor6	7.37399	6.65759	6.34465	33.3817	36.5163	38.8592				10.9002	8.13608	6.78543	Significantly different (P < 0.05)?	Yes		No		Yes		No		No				donor6	55.9504	50.7043	47.8136	31.1044	28.619	25.9624				21.1792	21.6106	20.4569
	donor7	16.114	15.3194	15.087	87.8205	88.8835	90.4924				23.1712	21.0146	18.8127	One- or two-tailed P value?	Two-tailed		Two-tailed		Two-tailed		Two-tailed		Two-tailed				donor7	148.319	133.748	131.952	109.036	100.662	96.7205				102.14	101.341	100.403
	donor8	13.91328*	14.02867*	14.95877*	89.80025*	94.24339*	96.10445*				16.7889*	17.05429*	15.68586*	Sum of positive, negative ranks	127.0 , -26.00		114.0 , -39.00		69.00 , -9.000		12.00 , -9.000		107.0 , -46.00				donor8
	donor9	13.3889	13.0949	12.4102	85.1488	83.7582	82.7075				23.4496	18.0647	15.1892	Sum of signed ranks (W)	101		75		60		3		61				donor9	99.6535	89.8522	84.6524	65.4081	55.7524	48.9527				65.2284	64.106	63.0806
	donor10	16.0642	15.4832	16.2197	110.798	114.781	117.156				27.1535	26.7136	23.9331	Number of pairs	17		17		12		6		17				donor10	154.106	148.242	148.231	105.733	88.5465	80.6644				106.747	108.254	109.125
	donor11	28.8013	28.3631	27.8249	135.576	131.666	127.057				34.9802	31.4597	27.5534	Number of ties (ignored)	0		0		0		0		0				donor11	289.208	270.629	262.856	189.576	167.774	158.538				166.411	164.14	163.476
	donor12	16.5961	17.6472	18.2899	109.972	109.683	108.398				25.9067	24.2167	21.625														donor12	177.248	170.184	175.825	145.102	131.717	126.84				129.233	128.218	127.254
	donor13	8.85824	7.93734	7.17019	74.1795	80.4126	80.403	93.1701	89.7048	89.0464	9.85304	7.36607	7.29319														donor13	88.2458	77.3582	61.8414	43.3303	27.7373	26.5282	33.5734	35.213	36.6912	17.2845	16.8485	23.007
	donor14	13.4381	12.6661	11.7426	61.2606	69.408	64.8056	81.3165	80.2679	84.908	23.0393	17.2716	16.569														donor14	124.759	110.327	100.323	47.014	40.662	42.1799	55.2949	52.0156	50.5131	30.8806	31.1382	34.7636
	donor15	13.9918	14.0571	14.3986	87.2389	90.2798	91.6714	109.628	105.264	103.519	17.9807	13.3148	12.0413														donor15	155.279	149.768	150.166	181.327	161.775	159.263	106.579	79.3151	67.2212	28.9059	29.8873	33.2661
	donor16	20.329	18.2637	18.1864	80.4493	79.0264	75.5135	93.813	93.2081	94.8574	23.3214	17.9855	17.2745														donor16	210.701	198.998	192.706	115.432	121.021	126.938	102.24	78.6558	69.1398	50.8601	45.9958	49.8483
	donor17	14.7594	14.5502	15.0445	87.1649	91.2597	93.8124	108.554	104.286	108.977	31.3577	26.3572	24.4868														donor17	139.772	145.661	143.413	153.011	133.111	126.504	129.034	92.5804	78.6937	32.4243	36.6563	40.9726
	donor18	7.25463	6.83095	6.7087	34.9735	45.7178	49.2794	71.838	71.6278	73.3783	17.8895	13.248	11.3069														donor18	77.9077	73.7624	72.9231	49.9244	41.1453	39.2126	32.2559	27.8408	27.4909	20.1001	17.9847	21.7321
	donor19				59.1469	59.8956	60.3844	86.2267	79.8073	78.4881	40.5868	29.1909	26.5657														donor19				53.0544	61.1941	58.7087	51.2808	43.4199	24.0573	28.5061	25.5293	24.1276
	donor20				72.9536	71.541	67.2487	88.6792	84.0165	90.2747	44.4591	34.163	29.624														donor20				60.3996	60.9031	62.6575	56.183	39.3941	30.1743	28.1045	25.879	23.692
	donor21				45.2444	48.4686	44.9101	57.6218	58.8304	61.0726	36.2238	27.57	24.1237														donor21				10.5332	14.2565	14.0739	15.2952	13.0155	10.8566	10.8246	11.4243	10.2929
	donor22				64.1534	67.1431	65.3349	82.5337	79.66	82.9697	41.7289	29.3285	28.137														donor22				76.2279	83.5078	87.6271	67.9527	52.4987	41.3018	41.2542	36.9667	35.1688
	donor23				66.8957	67.9451	65.9689	88.061	86.4968	91.5091	51.648	39.1693	33.7985														donor23				88.3637	87.7622	92.733	36.5991	39.8308	25.6617	32.3423	32.8887	30.5923
	donor24				80.1607	78.4253	73.5001	88.8046	87.2229	89.2542	43.08	34.9655	31.3914														donor24				68.0319	80.4079	71.4667	52.7603	46.7893	37.2205	32.4342	32.9414	30.5184
		*outlier	Each row in a different n derived from the median of at least 5 technical replicates
		Oligomycin stock used with donors 1-12 was off
		Donors 19-24 were assayed only assayed in media in glucose and followed by addition of oligomycin

## Sheet: Fig 4 - Fig S1J
			OCR - mitochondria stress test																												ECAR - mitochondria stress test
			baseline			oligomycin			FCCP			rotenone + antimycin A				Basal respiration		ATP production		Max respiration		SRC		Proton leak		Non mito acid					baseline			oligomycin			FCCP			Rotenone+antimycin
		Time (min)	1.40452	7.91587	14.4259	21.0135	27.5262	34.041	40.6164	47.134	53.6536	60.2314	66.7526	73.2704		21%O2	1%1day	21%O2	1%1day	21%O2	1%1day	21%O2	1%1day	21%O2	1%1day	21%O2	1%1day			Time (min)	1.40452	7.91587	14.4259	21.0135	27.5262	34.041	40.6164	47.134	53.6536	60.2314	66.7526	73.2704
	21%O2	donor1	41.8968	42.5506	44.232				106.832	88.947	84.7736	17.3215	19.5734	20.706	Exp1	23.6929	21.8766			74.3171	73.7625	50.6243	51.8859			19.2003	18.6875		21%O2	donor1	77.4076	75.8418	75.4064	82.3035	85.2363	88.2754	93.4159	97.8773	97.2776	94.2176	94.3932	94.5053
		donor2	41.2472	39.6634	37.7414				69.7954	68.8946	68.9049	19.7658	21.5814	21.762		18.5143	19.8876			48.1619	58.7725	29.6476	38.885			21.0364	28.0706			donor2	101.045	100.877	101.339	105.335	108.926	109.524	117.402	117.245	117.364	119.908	115.902	114.403
		donor3	110.528	106.795	105.141				261.672	307.451	322.447	28.5979	30.6088	32.6388		76.8727	101.744			266.575	425.593	189.702	323.849			30.6152	26.5629			donor3	126.141	127.673	128.435	137.735	139.678	147.215	164.7	164.506	165.12	153.255	146.606	143.31
		donor4	49.2118	50.4728	52.147				107.495	105.64	91.4109	16.9835	17.1014	17.6696		33.359	48.3257			84.2638	162.017	50.9048	113.691			17.2515	24.3052			donor4	80.9954	79.4015	81.03	84.1136	86.7133	89.662	102.826	106.567	108.085	107.962	106.078	105.184
		donor5	42.4088	43.8852	46.0555				104.96	93.8206	80.2761	15.7555	15.6571	18.7845		27.3842	43.4213			76.2864	132.784	48.9023	89.3625			16.7323	27.1636			donor5	79.0261	77.4962	76.9405	79.9851	79.4034	84.24	100.191	110.004	111.683	106.647	104.861	106.488
		donor6	48.7956	46.9618	47.3152				91.4675	85.2386	81.3311	17.7796	19.2822	20.7383		28.4242	38.1865			66.7457	117.135	38.3215	78.9484			19.2667	22.8918			donor6	94.3056	95.6493	96.841	98.4956	99.3534	103.66	117.665	120.182	120.56	120.788	116.822	115.493
		donor7	68.5943	62.9531	59.912				103.277	110.317	115.698	27.9145	25.3072	24.7379	Exp2	37.8333	64.7383			83.7777	193.579	45.9445	128.84			25.9865	36.9357			donor7	99.2724	95.9005	95.8375	112.738	109.266	102.811	123.273	120.828	118.006	114.969	110.597	108.059
		donor8	91.487	90.8842	95.9489				223.053	277.798	320.315	55.2354	39.6925	41.1114		47.427	35.44			228.375	148.182	180.949	112.742			45.3464	28.7443			donor8	135.302	134.983	137.34	152.224	154.821	154.725	152.498	149.711	147.595	161.669	153.095	155.167
		donor9	49.1189	45.8524	42.3366				78.1615	86.0214	91.6159	27.8228	27.1909	26.0452		18.7497	29.3001			58.2466	49.0056	39.497	19.7055			27.0196	19.8102			donor9	108.352	104.067	102.823	114.773	113.961	109.274	141.958	134.057	127.86	131.848	124.989	120.143
		donor10	36.2186	32.0864	30.8319				59.9299	63.7515	64.162	19.1292	18.4916	18.0506		14.4886	24.3629			44.0574	81.5298	29.5688	57.1668			18.5571	21.8935			donor10	93.1063	95.2651	97.0829	112.388	116.395	114.883	120.709	116.503	113.424	113.318	110.221	108.414
		donor11	31.8142	28.7025	26.3249				35.4146	35.4038	34.991	14.0906	14.9487	14.286		14.5055	83.642			20.8281	288.922	6.3226	205.28			14.4417	47.9644			donor11	76.5033	75.7142	74.7683	74.2684	75.5674	71.9698	88.9921	86.7373	81.4566	79.6146	78.3325	76.6801
		donor12	61.2173	57.6549	57.8872				118.03	129.026	136.988	26.802	26.4521	25.8792		32.542	45.7141			101.637	263.168	69.0948	217.454			26.3777	38.1409			donor12	109.492	108.713	109.405	113.34	113.65	107.843	127.963	126.24	123.896	123.389	117.624	114.703
		donor13	35.0329	30.8021	29.3946	27.7316	27.5568	27.0902	110.692	84.7432	68.0422	16.7886	12.7512	15.4664	Exp3	16.7411	25.4426	4.28368	16.8042	72.8236	41.1483	56.0824	15.7057	12.4575	8.63839	15.0021	11.9985			donor13	81.6749	80.6449	83.3409	105.895	99.1603	94.66	87.1878	87.4048	85.9381	99.3777	91.2056	76.4924
		donor14	45.0863	41.4671	35.4012	39.8679	34.0635	40.6374	56.9022	54.6105	63.5783	57.445	36.9762	25.141		0.797443	48.6572	2.46192	56.5162	18.5096	69.873	17.7121	21.2158	-1.66447	-7.85899	39.8541	38.0438			donor14	36.4648	37.8761	40.4492	78.8902	75.6518	68.6455	59.8279	60.5434	61.8563	81.8585	74.6622	61.9609
		donor15	62.5188	56.6669	52.0717	35.0632	36.1371	25.0427	101.831	91.2263	88.4839	68.7408	30.1611	23.7484		16.2024	24.2667	25.0048	32.2385	52.9636	67.9341	36.7613	43.6674	-8.80245	-7.97176	40.8834	44.8485			donor15	96.273	98.1889	98.2811	88.8148	87.6899	82.1127	80.6894	84.0751	83.8654	102.118	100.69	96.691
		donor16	119.112	111.071	112.178	107.131	75.2674	51.9231	232.901	301.232	286.334	209.06	30.4755	36.4629		22.1208	36.974	36.0129	56.3029	181.49	179.297	159.369	142.323	-13.8922	-19.3289	91.9994	62.4305			donor16	83.1904	86.5141	87.9302	102.282	98.6816	88.2893	62.7376	81.8383	77.4873	109.943	100.103	84.7892
		donor17	23.32	19.3716	18.0177	16.2845	16.4601	19.1455	31.0345	30.8134	28.0065	11.7313	7.80537	9.24908		10.6412	22.7199	2.93971	11.0087	20.3562	122.531	9.71506	99.8108	7.70145	11.7112	9.59526	53.5293			donor17	60.7748	61.6695	61.5728	60.4908	59.6639	54.2165	46.8236	50.3916	47.4423	60.1668	55.925	52.0561
		donor18	42.1207	34.0795	29.1807	17.6445	19.3128	15.1417	49.6507	38.3562	37.255	10.5123	7.73231	10.2319		25.6348	20.9028	17.7607	15.2408	32.2618	28.8826	6.62699	7.97983	7.87412	5.66203	9.49219	16.497			donor18	51.0132	48.5251	49.1538	58.8439	58.7077	54.7645	42.6259	49.0996	46.0395	51.3367	44.0551	41.713
		donor19	212.673	212.107	222.989	70.7195	47.9292	43.6423							Exp4			161.826	228.448											donor19
		donor20	112.19	107.064	108.24	37.2676	25.5824	25.5017										79.7142	90.6708											donor20
		donor21	28.4842	28.6623	30.6916	3.90735	2.04323	2.42771										26.4866	42.9454											donor21
		donor22	127.894	134.446	135.618	47.9531	31.1887	27.0991										97.2387	149.294											donor22
		donor23	92.7609	87.0826	88.1768	20.6197	18.3326	19.4219										69.882	105.746											donor23
		donor24	116.95	109.749	103.862	32.1965	25.1754	25.0272										82.7208	116.254											donor24
	1%1day	donor1	39.9548	40.0699	41.6675				99.203	90.1303	88.0168	16.8031	19.0868	20.1726	Statistical comparison - 21% vs 1%1day														1%1day	donor1	82.0025	80.7709	80.2094	82.3645	84.0299	86.6853	98.2694	100.486	103.626	102.028	99.4326	99.0569
		donor2	50.2415	48.0684	45.5645				84.3309	87.6344	88.5642	27.209	29.0331	27.9697	Wilcoxon matched-pairs signed rank test	Basal respiration		ATP production		Max respiration		SRC		Proton leak		Non mito acid				donor2	114.435	114.636	115.994	117.786	122.911	124.255	140.319	137.444	136.617	140.127	132.06	128.979
		donor3	130.344	126.159	128.417				384.885	482.023	489.558	10.1271	33.7759	35.7858	P value	<0.0001		0.001		0.0139		0.0067		0.5625		0.1964				donor3	131.028	132.415	134.451	150.127	159.679	168.278	175.108	174.765	174.245	166.104	156.555	154.787
		donor4	71.2146	72.2776	74.4004				180.563	189.328	189.076	22.5259	24.8108	25.5788	Exact or approximate P value?	Exact		Exact		Exact		Exact		Exact		Exact				donor4	99.9833	98.9946	98.7035	109.891	107.405	110.261	135.563	140.044	139.242	142.219	137.081	133.493
		donor5	68.4241	69.4802	73.8503				155.57	164.852	159.42	25.4573	27.912	28.1215	P value summary	****		***		*		**		ns		ns				donor5	86.1333	84.042	83.8499	86.4866	87.4869	89.0436	117.645	122.737	123.941	122.047	120.793	119.867
		donor6	63.4544	59.4874	60.2929				138.24	144.73	137.11	19.585	24.0438	25.0465	Significantly different (P < 0.05)?	Yes		Yes		Yes		Yes		No		No				donor6	109.613	109.243	108.824	111.609	112.017	112.885	139.984	140.286	138.836	136.146	129.945	128.32
		donor7	105.844	101.204	97.9737				213.071	236.418	242.055	39.4396	35.6853	35.6823	One- or two-tailed P value?	Two-tailed		Two-tailed		Two-tailed		Two-tailed		Two-tailed		Two-tailed				donor7	131.291	129.253	127.462	141.521	139.702	134.385	145.538	141.343	138.538	143.949	138.655	134.472
		donor8	66.0968	63.9694	62.4866				164.762	183.563	182.455	34.278	27.9245	24.0304	Sum of positive, negative ranks	285.0 , -15.00		77.00 , -1.000		141.0 , -30.00		106.0 , -14.00		7.000 , -14.00		116.0 , -55.00				donor8	114.514	117.438	118.293	135.233	131.691	126.656	118.161	114.832	111.276	140.926	134.725	131.568
		donor9	53.0367	48.3962	45.8979				67.649	68.4873	70.3111	21.2547	19.434	18.7417	Sum of signed ranks (W)	270		76		111		92		-7		61				donor9	102.89	102.23	101.159	106.909	106.792	102.95	107.115	101.1	98.3815	99.0603	96.9363	94.9449
		donor10	48.5309	47.3571	42.8813				95.9898	103.298	110.982	22.4921	21.7907	21.3977	Number of pairs	24		12		18		15		6		18				donor10	116.445	117.526	120.069	123.894	129.733	127.343	136.531	132.661	129.555	136.008	131.664	128.341
		donor11	137.139	129.959	127.721				287.541	342.681	380.438	46.5133	49.2107	48.169	Number of ties (ignored)	0		0		0		0		0		0				donor11	161.519	156.618	155.29	155.568	151.112	147.381	178.712	160.829	155.717	171.741	153.799	149.897
		donor12	84.8791	81.7416	84.9444				264.891	303.666	335.369	36.8868	37.6965	39.8394																donor12	129.295	128.888	133.57	137.835	128.708	122.341	152.7	146.199	145.424	147.397	140.952	138.906
		donor13	40.6314	36.7651	34.9266	21.3005	20.2167	20.3934	58.2683	55.5587	45.6132	16.3335	8.91941	10.7425																donor13	58.9554	59.3085	60.4552	56.2274	56.8844	51.4611	36.5167	43.3595	39.4169	75.697	63.8376	49.9163
		donor14	89.6734	84.3549	86.0746	31.8819	32.315	26.3574	108.763	110.487	104.5	66.0084	24.8159	23.307																donor14	72.7839	73.5225	77.591	68.125	74.1544	66.6893	46.8205	47.9365	48.1711	101.656	94.1232	94.8674
		donor15	74.0505	67.1347	66.1605	41.1733	35.0783	34.3787	128.445	102.01	107.892	83.9446	25.7633	24.8376																donor15	75.3252	75.7089	76.3584	91.2811	89.9384	83.1605	62.3614	61.2409	59.6759	113.46	103.157	92.4172
		donor16	105.672	96.7124	95.8293	43.5252	40.8112	44.9684	217.749	285.617	221.817	114.042	39.9454	33.3045																donor16	76.9299	79.1465	80.356	80.6334	79.0879	81.8913	60.7151	75.3315	70.1753	77.4874	77.9581	70.7474
		donor17	76.3837	77.1367	75.2273	80.1461	63.8779	51.6975	166.492	183.407	178.281	109.814	25.0239	25.7502																donor17	68.6753	75.778	76.8282	87.1812	82.3712	86.5873	63.8503	71.0408	72.9195	86.175	81.8812	71.0774
		donor18	41.1328	36.4243	34.6424	24.8621	23.8022	17.8128	47.7715	45.6401	42.7274	23.733	11.6826	14.0755																donor18	47.1059	45.6458	46.0721	60.1565	60.123	57.1191	45.2985	46.4039	45.2189	71.1737	66.3239	63.1868
		donor19	251.899	259.633	298.476	40.6956	44.2097	39.7578																						donor19
		donor20	128.498	124.907	125.814	47.632	30.2876	29.2867																						donor20
		donor21	56.1389	55.4049	55.8553	14.4776	11.6123	12.473																						donor21
		donor22	165.429	176.946	182.365	25.9834	25.1051	25.768																						donor22
		donor23	137.705	132.378	132.708	31.7447	28.1368	25.6711																						donor23
		donor24	149.167	143.611	143.801	32.6431	27.5611	27.6119																						donor24
			*outlier	Each row in a different n derived from the median of at least 5 technical replicates
			Oligomycin stock used with donors 1-12 was off
			Donors 19-24 were assayed only assayed in media in glucose and followed by addition of oligomycin

## Sheet: Fig 4 - Fig S1K
PC025f
Ct	A		B		C		D		E		F		G		H		I		J		K		L
n18S	21.3795	21.292	21.3992	21.7681	23.3522	22.7208	22.7681	23.0361	21.493	21.7851	21.8827	21.6118	20.4705	20.5998	21.0539	21.421	23.1144	23.0304	22.4925	22.492	22.5261	21.8914	21.879	22.5444
mtDNA	12.4548	12.5864	12.6948	12.5032	13.2025	13.0371	12.866	12.9838	12.7334	13.1722	13.3602	13.4587	12.8063	12.8704	12.4415	12.5377	12.5821	13.1248	11.6658	11.6276	12.4912	12.8046	12.7265	13.0054
X	21% n1	21% n2	21% n3	21% n4	21% n5	21% n6	1%1d n1	1%1d n2	1%1d n3	1%1d n4	1%1d n5	1%1d n6
	A	B	C	D	E	F	G	H	I	J	K	L
n18S	21.3357	21.5837	23.0365	22.9021	21.6391	21.7472	20.5352	21.2374	23.0724	22.4922	22.2088	22.2117
mtDNA	12.5206	12.599	13.1198	12.9249	12.9528	13.4095	12.8384	12.4896	12.8534	11.6467	12.6479	12.866
dCT	21% n1	21% n2	21% n3	21% n4	21% n5	21% n6	1%1d n1	1%1d n2	1%1d n3	1%1d n4	1%1d n5	1%1d n6		relative mtDNA												summary
	A	B	C	D	E	F	G	H	I	J	K	L			0.460626												mtDNA
mtDNA	8.81516	8.98465	9.91667	9.97721	8.68627	8.33777	7.69682	8.74783	10.219	10.8456	9.56092	9.34575			0.848611												0.460626
															1.23312												0.848611
mtDNA copy number	21% n1	21% n2	21% n3	21% n4	21% n5	21% n6	1%1d n1	1%1d n2	1%1d n3	1%1d n4	1%1d n5	1%1d n6			1.82557												1.23312
	A	B	C	D	E	F	G	H	I	J	K	L			1.83355												1.82557
mtDNA	900.858	1013.16	1933.06	2015.9	823.87	647.064	414.958	859.781	2383.7	3680.17	1510.61	1301.31			2.0111												1.83355
																											2.0111
LK008b																											1.72394
Cт	1		2		3		4		5		6		7		8												1.07888
n18S	17.5596	17.6093	17.1598	17.1756	16.6258	16.4624	17.1571	17.0966	17.4107	17.2567	17.2134	17.1411	17.1444	17.1369	17.5275	17.6487											1.109
mtDNA II	14.6208	14.6007	13.7288	13.6632	13.9876	13.077	14.3312	14.2791	13.644	13.5045	13.664	13.5281	13.9459	14.0135	14.1652	14.2861											1.45474
																										Paired t test
X	21% n7	21% n8	21% n9	21% n10	1%1d n7	1%1d n8	1%1d n9	1%1d n10																		P value	0.0495
	1	2	3	4	5	6	7	8																		P value summary	*
n18S	17.5845	17.1677	16.5441	17.1268	17.3337	17.1772	17.1407	17.5881																		Significantly different (P < 0.05)?	Yes
mtDNA II	14.6108	13.696	13.5323	14.3051	13.5743	13.596	13.9797	14.2256																		One- or two-tailed P value?	Two-tailed
																										t, df	t=2.268, df=9
dCT	21% n7	21% n8	21% n9	21% n10	1%1d n7	1%1d n8	1%1d n9	1%1d n10																		Number of pairs	10
	1	2	3	4	5	6	7	8						relative mtDNA
mtDNA II	2.9737	3.47168	3.01177	2.82169	3.75941	3.58121	3.16102	3.36245							1.72394
															1.07888
mtDNA copy number	21% n7	21% n8	21% n9	21% n10	1%1d n7	1%1d n8	1%1d n9	1%1d n10							1.109
	1	2	3	4	5	6	7	8							1.45474
mtDNA ll	15.711	22.1875	16.131	14.1398	27.0848	23.9376	17.8892	20.5698

## Sheet: Fig 4 - Fig S1L
	Pos filter	Neg filter
Sample_type	n1 21%	n2 21%	n3 21%	n4 21%	n1 1%1day	n2 1%1day	n3 1%1day	n4 1%1day	Sample_type	Fold change	(-log10 p-value)	Sample_type	1%1d/21% n1	1%1d/21% n2	1%1d/21% n3	1%1d/21% n4	MEDIAN
Oleoylcarnitine (C18:1)	19781	15709	23337		54853	42525	65399		Oleoylcarnitine (C18:1)	2.76705	1.80166	Oleoylcarnitine (C18:1)	2.77301	2.70705	2.80237		2.77301
Lauroylcarnitine	3948	3133	2819		8217	10242	8765		Lauroylcarnitine	2.7499	1.70391	Lauroylcarnitine	2.08131	3.26907	3.10926		3.10926
5-Methylthioadenosine (MTA)		3032608	1615315	3375177		2330340	1207170	2857751	5-Methylthioadenosine (MTA)	0.797106	1.61759	5-Methylthioadenosine (MTA)		0.768428	0.747328	0.846697	0.768428
Phenylalanine		2473	2109	3115		1933	1461	2198	Phenylalanine	0.726517	1.60938	Phenylalanine		0.781642	0.692745	0.705618	0.705618
Methionine	11817	9517	8846	8988	3556	6131	4171	5855	Methionine	0.503294	1.58532	Methionine	0.300922	0.644216	0.471513	0.651424	0.557864
Isoleucine		4050	2896	4798		2267	1822	2797	Isoleucine	0.586342	1.54381	Isoleucine		0.559753	0.629144	0.582951	0.582951
Myristoylcarnitine (C14:0)	22039	26537	31160	20180	43498	50574	51866	23571	Myristoylcarnitine (C14:0)	1.69652	1.46003	Myristoylcarnitine (C14:0)	1.97368	1.90579	1.66451	1.16804	1.78515
Palmitoylcarnitine (C16:0)	33478	34858	40575	24812	79693	74402	84404	29565	Palmitoylcarnitine (C16:0)	2.00462	1.39075	Palmitoylcarnitine (C16:0)	2.38046	2.13443	2.0802	1.19156	2.10731
Tyrosine	3989	2643	1956	2300	1048	1487	898	1461	Tyrosine	0.449486	1.26899	Tyrosine	0.262722	0.562618	0.4591	0.635217	0.510859
Xanthosine	9371	26256	17966	12438	6740	11992	8841	8053	Xanthosine	0.539534	1.20836	Xanthosine	0.71924	0.456734	0.492096	0.647451	0.569774
Sarcosine	3370	3996	3727	2270	804	2715	2664	1886	Sarcosine	0.603831	1.20477	Sarcosine	0.238576	0.679429	0.714784	0.830837	0.697107
Lactate	43289	25783	21406	32749	10149	16204	14696	17407	Lactate	0.474377	1.14371	Lactate	0.234448	0.628476	0.686536	0.531528	0.580002
Proline	308701	335247	304613	301301	122997	332433	209505	168433	Proline	0.666768	1.13258	Proline	0.398434	0.991606	0.687774	0.559019	0.623397
Argininosuccinate	27601	20585	17290	22841	11237	18306	12270	15378	Argininosuccinate	0.647565	1.07637	Argininosuccinate	0.407123	0.889288	0.709659	0.673263	0.691461
Valine	3159	1673	1437	2138	772	925	736	1636	Valine	0.484001	1.04901	Valine	0.244381	0.552899	0.512178	0.765201	0.532539
Alanine	6886	4788	3261	5788	2020	4066	2421	3059	Alanine	0.558124	0.998592	Alanine	0.293349	0.849206	0.74241	0.528507	0.635459
Aspartate		1196594	633084	1349223		937295	574994	1102669	Aspartate	0.822598	0.992296	Aspartate		0.783302	0.908243	0.817262	0.817262
Inosine	16990	47297		47873	6961	13167		30817	Inosine	0.454217	0.982418	Inosine	0.409712	0.27839		0.643724	0.409712
Adenosine	173892	227887		663078	54577	137775		383247	Adenosine	0.540541	0.959866	Adenosine	0.313856	0.604576		0.577982	0.577982
Creatinine	28635	13817	11187	18398	4322	7710	7643	10537	Creatinine	0.419396	0.948059	Creatinine	0.150934	0.558008	0.683204	0.572725	0.565367
Glutamine	3603	1846	1803	1894	798	1263	1392	1059	Glutamine	0.49333	0.891382	Glutamine	0.221482	0.684182	0.772047	0.559134	0.621658
Folate	11912	3384	3261	7526	1058	1182	2090	3575	Folate	0.303071	0.891315	Folate	0.088818	0.349291	0.640908	0.47502	0.412155
Tryptophan	50505	23795	19165	29331	12558	15823	14200	17590	Tryptophan	0.490008	0.885816	Tryptophan	0.248649	0.664972	0.740934	0.599707	0.632339
Isovalerylcarnitine	355022	155726	210657	237178	540910	604578	881314	183272	Isovalerylcarnitine	2.30556	0.851014	Isovalerylcarnitine	1.5236	3.88232	4.18364	0.772719	2.70296
Threonine	16373	9948	7636	10958	5764	8598	6132	7408	Threonine	0.621218	0.836373	Threonine	0.352043	0.864294	0.803038	0.676036	0.739537
Stearoylcarnitine (C18:0)	22620		26235	10363	22472		24812	9427	Stearoylcarnitine (C18:0)	0.957665	0.814209	Stearoylcarnitine (C18:0)	0.993457		0.945759	0.909679	0.945759
Serine	15232	6898	4889	8477	4635	4277	4041	6413	Serine	0.545583	0.777776	Serine	0.304294	0.620035	0.826549	0.756518	0.688276
Hydroxyproline	75502	49403	37250	49350	24851	49450	28801	28776	Hydroxyproline	0.623522	0.768406	Hydroxyproline	0.329144	1.00095	0.773181	0.5831	0.678141
3-Methylhistidine	16912	6298	3867	9422	2038	3624	3218	5447	3-Methylhistidine	0.392531	0.74438	3-Methylhistidine	0.120506	0.575421	0.83217	0.578115	0.576768
Cystine	63247	13262	13427	35330	4036	2886	11704	18217	Cystine	0.294118	0.740647	Cystine	0.0638133	0.217614	0.871676	0.515624	0.366619
Histidine	41763	14716	10368	25997	6627	9437	9392	15790	Histidine	0.444251	0.720634	Histidine	0.158681	0.641275	0.905864	0.607378	0.624326
UDP-Acetylglucosamine	46625	51185	50644	53261	32880	56504	36966	46512	UDP-Acetylglucosamine	0.856962	0.685331	UDP-Acetylglucosamine	0.705201	1.10392	0.729919	0.873284	0.801602
Glycine	1867	1180	1054	1576	881	1250	969	1050	Glycine	0.73102	0.684798	Glycine	0.47188	1.05932	0.919355	0.666244	0.792799
Adenine	291341	129212	71334	163830	75845	109929	39378	131619	Adenine	0.544093	0.67747	Adenine	0.260331	0.850765	0.552023	0.803388	0.677705
Asparagine	76941	46546	36966	48485	26338	47712	31056	32536	Asparagine	0.65877	0.661099	Asparagine	0.342314	1.02505	0.840123	0.671053	0.755588
Propionylcarnitine (C3:0)	625625	314188	459284	514279	953314	1482872	1837786	108400	Propionylcarnitine (C3:0)	2.29039	0.640153	Propionylcarnitine (C3:0)	1.52378	4.7197	4.00142	0.210781	2.7626
Carnitine	5642	3152	4548	2719	1483	3088	2770		Carnitine	0.609427	0.630631	Carnitine	0.26285	0.979695	0.609059		0.609059
Arginine	112372	19953	11299	55732	5445	8571	20257	27416	Arginine	0.309441	0.572586	Arginine	0.0484551	0.429559	1.79281	0.491926	0.460743
Glucose (as Hexose)	1319	267	358	851			285	643	Glucose (as Hexose)	0.664043	0.544971	Glucose (as Hexose)			0.796089	0.755582	0.775836
Acetylcarnitine (C2:0)	26821	21590	23285	13068	23123	47462	44451	8162	Acetylcarnitine (C2:0)	1.45342	0.494133	Acetylcarnitine (C2:0)	0.862123	2.19833	1.909	0.624579	1.38556
Butyrylcarnitine (C4:0)	37728	38714	34249	36814	14897	41684	26540	37646	Butyrylcarnitine (C4:0)	0.818732	0.473003	Butyrylcarnitine (C4:0)	0.394853	1.07672	0.774913	1.0226	0.898757
Methylguanidine	1591	2156	855	1635	773	1141	1159	1729	Methylguanidine	0.769921	0.451989	Methylguanidine	0.485858	0.529221	1.35556	1.05749	0.793357
Taurine	104857	85733	105065	68986	53278	96956	90675	65370	Taurine	0.839947	0.448678	Taurine	0.508102	1.13091	0.863037	0.947584	0.90531
N-Monomethylarginine	9072	1855	1129	4163	631	1001	2833	2355	N-Monomethylarginine	0.420494	0.44789	N-Monomethylarginine	0.0695547	0.539623	2.5093	0.565698	0.55266
Histamine	23089	4368	20519	33598	2379	3155	28100	22789	Histamine	0.691679	0.421959	Histamine	0.103036	0.722299	1.36946	0.678284	0.700291
Octanoylcarnitine (C8:0)	5668	3579	3155	3527	4546	3781	4432	5171	Octanoylcarnitine (C8:0)	1.12562	0.319099	Octanoylcarnitine (C8:0)	0.802047	1.05644	1.40475	1.46612	1.2306
Methyltryptophan	1819	2954	393	2931			316	4569	Methyltryptophan	1.20662	0.275802	Methyltryptophan			0.804071	1.55885	1.18146
Carnosine	34517	9710	8144	16231	6636	13889	14903	12684	Carnosine	0.701321	0.249703	Carnosine	0.192253	1.43038	1.82994	0.781468	1.10592
N-Acetyl-L-methionine	8722	5857	4839	5389	8483	9106	6915	3106	N-Acetyl-L-methionine	1.11299	0.215462	N-Acetyl-L-methionine	0.972598	1.55472	1.42901	0.576359	1.20081
Glutamate	168531	121285	174305	135704	158668	201702	203952	89972	Glutamate	1.09081	0.187397	Glutamate	0.941477	1.66304	1.17009	0.663002	1.05578
Hexanoylcarnitine (C6:0)	9151	4770	4916	5923	4029	5423	5107	7483	Hexanoylcarnitine (C6:0)	0.890226	0.165687	Hexanoylcarnitine (C6:0)	0.44028	1.1369	1.03885	1.26338	1.08788
Succinate	37223	13512	14820	32936	11352	29997	22934	18933	Succinate	0.84491	0.141515	Succinate	0.304973	2.22003	1.5475	0.574842	1.06117
S-Adenosylhomocysteine (SAH)	5813	6264	5227	5217	3253	6985	6939	4277	S-Adenosylhomocysteine (SAH)	0.952622	0.0996105	S-Adenosylhomocysteine (SAH)	0.559608	1.1151	1.32753	0.81982	0.967461
Cytosine	5784	5964	4101	4780	4645	7635	4714	2803	Cytosine	0.959668	0.0874619	Cytosine	0.803077	1.28018	1.14948	0.586402	0.976277
N-Acetylputrescine	33844	31161	45245	83313	34567	59947	61698	44098	N-Acetylputrescine	1.03486	0.0379023	N-Acetylputrescine	1.02136	1.92378	1.36364	0.529305	1.1925
