# Supplementary material for: Oxygen levels at the time of activation determine T cell persistence and immunotherapeutic efficacy
Source: eLife journal article supplement (doi:10.7554/elife.84280), 2023-05-11
Supplement: fig5-data1 [file Figure 5 - Source Data 1.xlsx]

## Sheet: Fig 5B
nuclear fraction																																					Summary data
HIF-1a						NFAT nuclear						NFkB nuclear						NFIL3						PGC-1a						c-Myc								0.01									FG-4592
		Histone3	HIF1	norm	vs CT			Histone3	NFAT	norm	vs CT			Histone3	NFkB	norm	vs CT			Histone3	NFIL3	norm	vs CT			Histone3	PGC1a	norm	vs CT									HIF-1α	NFAT	NFkB	NFIL3	c-Myc	GLUT1	LDHA	PGC-1α		HIF-1α	NFAT	NFkB
n=1	CT	633575	499537	0.788442	1	n=1	CT	982375	11621376	11.8299	1	n=1	CT	633575	3474873	5.48455	1	n=1	CT	982375	8999410	9.16087	1	n=1	CT	982375	1285084	1.30814	1									10.2516	0.79306	0.901329	1.47766	0.61778	6.11141	1.70589	0.503597		25.709	0.917063	0.860111
	0.01	741750	5995406	8.08279	10.2516		0.01	840900	7889154	9.3818	0.79306		0.01	741750	3666753	4.94338	0.901329		0.01	840900	11382945	13.5366	1.47766		0.01	840900	553964	0.658775	0.503597									9.92391	0.735721	0.989312	1.34561	0.684068	3.52267	2.13582	1.27646		18.9212	0.576787	0.658391
	FG	678475	13752715	20.27	25.709		FG	676500	7339176	10.8487	0.917063		FG	678475	3200583	4.71732	0.860111		FG	676500	8507170	12.5753	1.37272		FG	676500	309700	0.457797	0.349961									14.1777	0.607118	0.730183	1.54187	2.13629	4.26612	1.6258	1.41665		23.5582	0.517088	0.992801
	RAP	548050	623524	1.13771	1.44299		RAP	603275	7565103	12.5401	1.06003		RAP	548050	3956172	7.21863	1.31618		RAP	603275	2815505	4.66703	0.509453		RAP	603275	174230	0.288807	0.220777									27.3774	1.36166	0.853647	1.72435	0.632469	2.23829	1.96685	1.19064		27.3774	1.11009	0.713026
n=2	N	728675	131683	0.180716	0.354497	n=2	N	664075	2357472	3.55001	0.279696	n=2	N	728675	1388793	1.90592	0.273615	n=2	N	664075	270270	0.406987	0.0333872	n=2	N	664075	257716	0.388083	0.289387									16.0768	0.817506	0.742441	0.955122		5.01114	2.46813	1.19829		16.0768	0.715076	0.82336
	CT	519675	264920	0.50978	1		CT	564425	7163910	12.6924	1		CT	519675	3619890	6.96568	1		CT	564425	6880300	12.1899	1		CT	564425	756922	1.34105	1									36.4486	0.772786	0.499873			2.87786	1.36548	1.02534		32.8388	0.962713	1.30767
	0.01	692050	3501088	5.05901	9.92391		0.01	675625	6309030	9.33806	0.735721		0.01	692050	4769079	6.89123	0.989312		0.01	675625	11082225	16.4029	1.34561		0.01	675625	1156530	1.71179	1.27646									17.2545	0.776208	0.940963			3.80023	1.49261			12.0108	1.21141	1.08521
	FG	610475	5888439	9.64567	18.9212		FG	667875	4889391	7.32082	0.576787		FG	610475	2799726	4.58614	0.658391		FG	667875	10209080	15.2859	1.25398		FG	667875	1127878	1.68876	1.25928										0.866245	1.7372			4.64154	2.09407				0.621466	1.09745
	RAP	613550	223443	0.364181	0.714388		RAP	660975	2764632	4.18266	0.32954		RAP	613550	3043389	4.9603	0.712105		RAP	660975	3723160	5.63283	0.462089		RAP	660975	1422112	2.15154	1.60437										0.671123	0.67306								0.714308	0.925092
n=3	N	1345675	93203	0.0692612	0.23079	n=3	N	964100	2303028	2.38879	0.174617	n=3	N	1345675	1205646	0.895941	0.225677	n=3	N	964100	277550	0.287885	0.0225606	n=3	N	964100	1029306	1.06763	0.78487										0.740681	1.13446								0.810857	1.07922
	CT	1170025	351130	0.300105	1		CT	797675	10912317	13.6802	1		CT	1170025	4645013	3.97001	1		CT	797675	10178735	12.7605	1		CT	797675	1085052	1.36027	1										0.852839	1.10877
	0.01	1092650	4649013	4.25481	14.1777		0.01	741925	6162039	8.30547	0.607118		0.01	1092650	3167414	2.89884	0.730183		0.01	741925	14597450	19.6751	1.54187		0.01	741925	1429712	1.92703	1.41665										0.777288	0.978437
	FG	1064250	7524172	7.06993	23.5582		FG	690250	4882722	7.07385	0.517088		FG	1064250	4194669	3.94143	0.992801		FG	690250	11647265	16.874	1.32236		cut these wells horizontaly by mistake													outlier determined with grubbs method (alpha = 0.05)
	RAP	917875	212602	0.231624	0.771811		RAP	759800	4003077	5.26859	0.385127		RAP	917875	4416151	4.81128	1.21191		RAP	759800	5626145	7.40477	0.580288														One sample t test									One sample t test
n=4	CT	1347375	147852	0.109733	1	n=4	CT	791000	2893722	3.65831	1	n=4	CT	1347375	3161182	2.34618	1	n=4	CT	791000	8218875	10.3905	1	n=4	CT	791000	2528136	3.19613	1								t, df	t=4.837, df=6	t=10.33, df=10	t=2.270, df=10	t=3.176, df=4	t=17.70, df=2	t=7.042, df=7	t=6.510, df=7	t=3.473, df=4	t, df	t=7.912, df=6	t=2.526, df=9	t=0.7333, df=9
	0.01	1526275	4585262	3.00422	27.3774		0.01	779775	3884361	4.98139	1.36166		0.01	1526275	3056837	2.00281	0.853647		0.01	779775	13971125	17.9169	1.72435		0.01	779775	2967393	3.80545	1.19064								P value (two tailed)	0.003	<0.001	0.05	0.03	0.003	<0.001	<0.001	0.03	P value (two tailed)	<0.001	0.03	0.48
n=5	CT	1646975	230177	0.139757	1	n=5	CT	743125	4730544	6.36574	1	n=5	CT	1646975	3496234	2.12282	1	n=5	CT	743125	9650270	12.9861	1	n=5	CT	743125	2494674	3.357	1								P value summary	**	***	*	*	**	***	***	*	P value summary	***	*	ns
	0.01	1405800	3158616	2.24685	16.0768		0.01	724650	3771105	5.20404	0.817506		0.01	1405800	2215640	1.57607	0.742441		0.01	724650	8988035	12.4033	0.955122		0.01	724650	2915016	4.02265	1.19829								Significant (alpha=0.05)?	Yes	Yes	Yes	Yes	Yes	Yes	Yes	Yes	Significant (alpha=0.05)?	Yes	Yes	No
								HDAC1	NFAT	norm	vs CT			HDAC1	NFkb	norm	vs CT									HDAC1	PGC1a	norm	vs CT
						n=6	CT	189926	3769301	19.8462	1	n=6	CT	189926	2277074	11.9893	1							n=6	CT	189926	2053907	10.8142	1
							0.01	234738	3600137	15.3368	0.772786		0.01	234738	1406811	5.99311	0.499873								0.01	234738	2602839	11.0883	1.02534
							FG	168525	3712765	22.0309	1.11009		FG	168525	1440663	8.54866	0.713026								FG	168525	1998851	11.8609	1.09678
							RAP	140558	3986824	28.3643	1.42921		RAP	140558	1496277	10.6453	0.887899								RAP	140558	1750396	12.4532	1.15155
		HDAC1	HIF1	norm	vs CT			LMNB1	NFAT	norm	vs CT			HDAC1	NFkb	norm	vs CT
n=7	CT	682488	243236	0.356396	1	n=7	CT	2975025	12045530	4.04888	1	n=7	CT	682488	2492534	3.65213	1
	0.01	708224	9199924	12.9901	36.4486		0.01	2905375	9130940	3.14278	0.776208		0.01	708224	2433824	3.43652	0.940963
	FG	935361	10947116	11.7036	32.8388		FG	3753475	10867290	2.89526	0.715076		FG	935361	2812646	3.00702	0.82336
	RAP	888699	254252	0.286095	0.802744		RAP	2750125	12043220	4.37915	1.08157		RAP	888699	3733462	4.20104	1.1503
n=8	CT	485553	915518	1.88552	1	n=8	CT	2881800	13566805	4.70775	1	n=8	CT	485553	4074550	8.39157	1
	0.01	295680	9619552	32.5337	17.2545		0.01	1958825	7988225	4.07807	0.866245		0.01	295680	4310378	14.5778	1.7372
	FG	592020	13407220	22.6466	12.0108		FG	1816825	8234240	4.53221	0.962713		FG	592020	6496480	10.9734	1.30767
	RAP	672024	535534	0.796897	0.422641		RAP	1407425	7796355	5.53945	1.17666		RAP	672024	7734520	11.5093	1.37153
								TPS	NFAT	norm	vs CT			TPS	NFkb	norm	vs CT															TPS	c-Myc	norm	vs CT
						n=9	CT	31598067	2572560	0.0814151	1	n=9	CT	31598067	2159226	0.0683341	1													n=9	CT	9052202	5380320	0.594366	1
							FG	29032762	2863408	0.0986268	1.21141		FG	29032762	2152980	0.0741569	1.08521														FG	8140022	6767952	0.831441	1.39887
							0.01	26353676	1439952	0.0546395	0.671123		0.01	26353676	1212084	0.045993	0.67306														0.01	6778997	2489160	0.367187	0.61778
						n=10	CT	27576770	1945616	0.0705527	1	n=10	CT	27576770	592902	0.0215001	1													n=10	CT	6016823	7801824	1.29667	1
							FG	23008119	1008816	0.0438461	0.621466		FG	23008119	542880	0.0235951	1.09745														FG	6568271	4421832	0.673211	0.519185
							0.01	30284445	1582576	0.0522571	0.740681		0.01	30284445	738666	0.0243909	1.13446														0.01	10191208	9039696	0.887009	0.684068
						n=11	CT	33226260	1664928	0.0501088	1	n=11	CT	33226260	1371150	0.0412671	1													n=11	CT	13119292	7760520	0.591535	1
							FG	27179307	972832	0.0357931	0.714308		FG	27179307	1037592	0.0381758	0.925092														FG	6550331	5893104	0.899665	1.5209
							0.01	27301069	1166704	0.0427347	0.852839		0.01	27301069	1249182	0.0457558	1.10877														0.01	7579213	9577776	1.26369	2.13629
						n=12	CT	23512164	1403344	0.0596859	1	n=12	CT	23512164	833508	0.0354501	1													n=12	CT	5054595	9431808	1.86599	1
							FG	24859550	1203120	0.0483967	0.810857		FG	24859550	951084	0.0382583	1.07922														FG	4441599	10883208	2.45029	1.31313
							0.01	17755747	823744	0.0463931	0.777288		0.01	17755747	615870	0.0346857	0.978437														0.01	4979201	5876352	1.18018	0.632469
cytoplasmic fraction
GLUT1						LDHA						cytoplasmic NFAT						Cytoplasmic NFKB
		Vinculin	GLUT1	norm	vs CT			Vinculin	LDHA	norm	vs CT			Vinculin	NFAT	norm	vs CT			Vinculin	HK1	norm	vs CT
n=1	CT	4063200	67776	0.0166804	1	n=1	CT	4063200	3210130	0.79005	1	n=1	CT	4063200	957650	0.235689	1	n=1	CT	4063200	5113680	1.25854	1
	0.01	3857760	393264	0.101941	6.11141		0.01	3857760	5199238	1.34773	1.70589		0.01	3857760	703200	0.182282	0.773402		0.01	3857760	4791462	1.24203	0.986887						relevant bands used in Fig 4I and S4K (cito NFKb and NFAT)
	FG	4080672	253776	0.0621898	3.7283		FG	4080672	4650162	1.13956	1.44239		FG	4080672	1085025	0.265894	1.12816		FG	4080672	5143684	1.2605	1.00156
	RAP	3909024	90696	0.0232017	1.39095		RAP	3909024	3204212	0.819696	1.03752		RAP	3909024	1318500	0.337296	1.43111		RAP	3909024	5627830	1.4397	1.14395
n=2	CT	3228072	145704	0.0451365	1	n=2	CT	3228072	2601764	0.805981	1	n=2	CT	3228072	1019650	0.31587	1	n=2	CT	3228072	4425226	1.37086	1
	0.01	2706696	430368	0.159001	3.52267		0.01	2706696	4659380	1.72143	2.13582		0.01	2706696	702450	0.259523	0.821614		0.01	2706696	3301610	1.21979	0.889803
	FG	2804808	280824	0.100122	2.21821		FG	2804808	3896596	1.38926	1.72368		FG	2804808	676775	0.241291	0.763894		FG	2804808	3729986	1.32985	0.97009
	RAP	2591448	63456	0.0244867	0.542503		RAP	2591448	1991352	0.768432	0.953413		RAP	2591448	761150	0.293716	0.929865		RAP	2591448	3644290	1.40628	1.02584
n=3	CT	2801040	65664	0.0234427	1	n=3	CT	2801040	2051940	0.732564	1	n=3	CT	2801040	523100	0.186752	1	n=3	CT	2801040	2308982	0.82433	1			Additional info:
	0.01	2545200	254544	0.100009	4.26612		0.01	2545200	3031336	1.191	1.6258		0.01	2545200	432500	0.169928	0.909911		0.01	2545200	1923532	0.755749	0.916804			Protein ladder: Precision Plus Protein™ Dual Color Standards (Biorad)
	FG	2313672	144240	0.0623425	2.65935		FG	2313672	2362250	1.021	1.39373		FG	2313672	371700	0.160654	0.860251		FG	2313672	1637584	0.707786	0.858619			Running buffer: MOPS
	RAP	2633808	49560	0.0188169	0.802674		RAP	2633808	997832	0.378855	0.517164		RAP	2633808	435850	0.165483	0.88611		RAP	2633808	1351246	0.513039	0.622371			Cut membrane: at 75kDa and 37kDa before incubation with primary and secondary antibodies
n=4	CT	2480712	80280	0.0323617	1	n=4	CT	2480712	1795398	0.723743	1	n=4	CT	2480712	832275	0.335498	1	n=4	CT	2480712	1560806	0.629177	1			Method od detection: ECL
	0.01	2557224	185232	0.0724348	2.23829		0.01	2557224	3640186	1.42349	1.96685		0.01	2557224	767850	0.300267	0.894988		0.01	2557224	1754662	0.686159	1.09057
n=5	CT	3628008	128112	0.0353119	1	n=5	CT	3628008	3705680	1.02141	1	n=5	CT	3628008	2677248	0.737939	1	n=5	CT	3628008	5090332	1.40307	1
	0.01	2352216	416232	0.176953	5.01114		0.01	2352216	5929858	2.52097	2.46813		0.01	2352216	1814784	0.771521	1.04551		0.01	2352216	4413708	1.8764	1.33736
	FG	2887152	390024	0.13509	3.8256		FG	2887152	5449730	1.88758	1.84802		FG	2887152	1899408	0.657883	0.891514		FG	2887152	5182866	1.79515	1.27945
	RAP	2076936	90864	0.0437491	1.23893		RAP	2076936	2731608	1.31521	1.28764		RAP	2076936	1969776	0.948405	1.28521		RAP	2076936	4292730	2.06686	1.4731
n=6	CT	2617848	164136	0.0626988	1	n=6	CT	2617848	3912018	1.49436	1	n=6	CT	2617848	2597328	0.992162	1	n=6	CT	2617848	4585230	1.75153	1
	0.01	2761008	498192	0.180438	2.87786		0.01	2761008	5633914	2.04053	1.36548		0.01	2761008	1321896	0.478773	0.482555		0.01	2761008	5038176	1.82476	1.04181
	FG	3125712	383112	0.122568	1.95487		FG	3125712	4483468	1.43438	0.959862		FG	3125712	835200	0.267203	0.269314		FG	3125712	4517916	1.4454	0.825225
	RAP	3551304	95424	0.0268701	0.428559		RAP	3551304	2998380	0.844304	0.564992		RAP	3551304	1070352	0.301397	0.303778		RAP	3551304	4826952	1.35921	0.776012
n=7	CT	3812016	115944	0.0304154	1	n=7	CT	3812016	3594030	0.942816	1	n=7	CT	3812016	1001496	0.262721	1	n=7	CT	3812016	5319366	1.39542	1
	0.01	3532968	408360	0.115586	3.80023		0.01	3532968	4971780	1.40725	1.49261		0.01	3532968	1064184	0.301215	1.14652		0.01	3532968	4355910	1.23293	0.883556
	FG	3720888	318840	0.0856892	2.8173		FG	3720888	4523904	1.21581	1.28955		FG	3720888	1486056	0.399382	1.52018		FG	3720888	4822168	1.29597	0.928732
	RAP	3380424	80832	0.0239118	0.786174		RAP	3380424	2620464	0.775188	0.822205		RAP	3380424	1501296	0.444115	1.69044		RAP	3380424	3996252	1.18217	0.847182
n=8	CT	2445936	68832	0.0281414	1	n=8	CT	2445936	2246684	0.918538	1	n=8	CT	2445936	1554144	0.635398	1	n=8	CT	2445936	2398370	0.980553	1
	0.01	1967856	257040	0.130619	4.64154		0.01	1967856	3785144	1.92349	2.09407		0.01	1967856	1525752	0.775337	1.22024		0.01	1967856	1299948	0.660591	0.673692
[truncated: 5 more columns]

## Sheet: Fig 5C
		% phosphoS6 positive cells 24h after activation					% phospho mTOR positive cells 24h after activation
		21%	1%	FG-4592	non activated			21%	1%	non activated
	PC076a	66.4	53.9	45.3			PC076g	49.2	43.8	3.47
		55.2	55.1	41.3				56.4	53.9	4.13
		65.5		52.1				40.9	32.8	0
		64.4	59.4	54.1				65.8	51.7	5.53
		65.8	57.9	52.2				61.5	48.8	3.81
								53.5	50.6	4.68
	PC076c	61.3	51.4	50.5	0.19
		64.9	51.1	50	0.26		PC076h	36.7	28.2
		75.4	59.9	64.2	0.51			51.9	38.3
		50.4	41.8	39.7	2.37			62.5	56.8
								51.9	35.8
	PC076d	54.5	45.9	48.3	0.14			61.8	41.2
		55.9	46.3	41.5	0.095			56.4	41.6
		63.3	64.3	59.5	0.032
		75.9	65.5	63.1	0.063
		60	60	53.2	0.051
		72.9	68.7	66.9	0.37
	Holm-Šídák's multiple comparisons test	Mean Diff.	Below threshold?	Summary	Adjusted P Value		Holm-Šídák's multiple comparisons test	Mean Diff.	Below threshold?	Summary	Adjusted P Value
	21% vs. 1%	7.653	Yes	***	<0.0001		CT vs. Acti1%	10.42	Yes	***	<.001
	21% vs. FG-4592	11.33	Yes	***	<0.0001		CT vs. Naive	50.44	Yes	***	<.001
	21% vs. Naive	63.05	Yes	***	<0.0001

## Sheet: Fig 5D
		IL-2 in media conditned by 24h-activated CD8+ T cells (
		21%	1%	FG-4592	Naive
	PC076a	2.546	5.57	2.415
		3.908	6.77	2.839
		4.563	8.277	5.28
		5.277	8.57	5.677
		4.225	7.86	4.925
		6.673	8.777	7.567
	PC076c	4.611	4.898	4.508	2.76
		5.063	6.104	5.08	3.16
		7.346	7.525	6.539	3.246
		9.218	9.377	8.794	2.825
		7.653	8.056	6.853	3.594
	PC076d	7.787	8.173	6.46	3.163
	Holm-Šídák's multiple comparisons test	Mean Diff.	Below threshold?	Summary	Adjusted P Value
	21% vs. 1%	-1.757	Yes	**	0.0052
	21% vs. FG-4592	0.1611	No	ns	0.4678
	21% vs. Naive	2.615	Yes	*	0.0383

## Sheet: Fig 5E
	Blimp1		pSTAT5	pSTAT5	CD25	pSTAT5
	0.21	0.01	0.21	0.01	0.21	0.01
PC076a	5055	4459	1069	1071	5649	6445
	6738	5409	1285	1215	8061	7492
	5983	5322	1197	1209	7684	6590
	6218		1180		7164
	5934	4615	1301	1342	8387	10700
	7144	5250	1245	1294	5380	8269
PC076b	5967	4882	384	591	6909	8629
	4506	3961	313	316	7064	6375
	5152	5124	440	405	6928	7409
	5096	5096	399	377	6645	8223
	4482	3626	250	313	5513	7347
	5042	4640	344	507	7285	7409
PC076d	3409	3048	535	573	24111	28490
	4319	3702	644	616	28839	32983
	3515	3025	1008	1273	29822	32882
	2957	2552	437	504	21177	24257
PC076e	3740	3314	354	375	12339	12705
	5483	4331	482	566	19295	25694
	6033	5513	686	664	15569	19586
Norm to 21								Shapiro-Wilk test
		Blimp1		pSTAT5		CD25			Blimp1	pSTAT5	CD25
PC076a		0.882097		1.00187		1.14091		W	0.9635	0.8324	0.9775
		0.80276		0.945525		0.929413		P value	0.6698	0.0045	0.9205
		0.88952		1.01003		0.857626		Passed normality test (alpha=0.05)?	Yes	No	Yes
								P value summary	ns	**	ns
		0.777722		1.03151		1.27578		Wilcoxon Signed Rank Test
		0.734882		1.03936		1.53699			Blimp1	pSTAT5	CD25
								Sum of signed ranks (W)	-153	90	137
PC076b		0.818167		1.53906		1.24895		Sum of positive ranks	0	130.5	154
		0.87905		1.00958		0.902463		Sum of negative ranks	-153	-40.5	-17
		0.994565		0.920455		1.06943		P value (two tailed)	<0.001	0.05	0.002
		1		0.944862		1.23747		Exact or estimate?	Exact	Exact	Exact
		0.809014		1.252		1.33267		P value summary	***	*	**
		0.92027		1.47384		1.01702		Significant (alpha=0.05)?	Yes	Yes	Yes
PC076d		0.894104		1.07103		1.18162
		0.857143		0.956522		1.14369
		0.860597		1.2629		1.10261
		0.863037		1.15332		1.14544
PC076e		0.886096		1.05932		1.02966
		0.789896		1.17427		1.33164
		0.913807		0.96793		1.25801

## Sheet: Fig 5F
0.21	F340nm/F380nm
Time (min)
0	0.3976	0.3669	0.4094	0.4348	0.3561	0.3878	0.3118	0.3209	0.4396	0.2857	0.3308	0.3343	0.2861	0.339	0.3196	0.3558	0.2951	0.3166	0.4769	0.4162	0.3808	0.4997	0.4507	0.4348	0.3651	0.4363	0.3191	0.3571	0.3221	0.3289	0.4133	0.2839	0.3584	0.4488	0.4586	0.4081	0.4337	0.3946	0.4079	0.3946	0.4506	0.3951	0.3516	0.335	0.3687	0.3415	0.3177	0.2796	0.3286
0.08334	0.4024	0.371	0.4078	0.441	0.3562	0.3876	0.315	0.3214	0.4405	0.2868	0.3329	0.3383	0.2873	0.3431	0.3324	0.3576	0.2982	0.3179	0.4673	0.4337	0.3855	0.494	0.4564	0.4375	0.3702	0.4493	0.3247	0.3627	0.3314	0.3308	0.4258	0.288	0.3622	0.4507	0.4633	0.413	0.4408	0.3951	0.415	0.4097	0.4563	0.3994	0.3576	0.3363	0.3742	0.3454	0.32	0.2857	0.3245
0.166747	0.3993	0.3717	0.4001	0.4391	0.3588	0.3864	0.314	0.3193	0.4389	0.2884	0.3318	0.3382	0.2882	0.3414	0.3382	0.3554	0.2978	0.3159	0.4683	0.4336	0.3861	0.4847	0.4512	0.4336	0.3718	0.4538	0.3207	0.3603	0.3349	0.3337	0.4455	0.2869	0.3634	0.4509	0.4617	0.4172	0.4398	0.3935	0.4155	0.4113	0.4572	0.3982	0.36	0.3365	0.3695	0.3412	0.318	0.2837	0.3209
0.250197	0.5335	0.4979	0.5172	0.5647	0.4622	0.5073	0.409	0.3965	0.5211	0.3555	0.411	0.4274	0.372	0.4235	0.4071	0.4159	0.4212	0.4224	0.536	0.497	0.5153	0.5945	0.5717	0.5225	0.4854	0.5856	0.4526	0.4557	0.5102	0.5027	0.5956	0.4199	0.4987	0.5385	0.597	0.5095	0.582	0.5599	0.5588	0.5331	0.5783	0.5323	0.4915	0.4308	0.4698	0.4558	0.5154	0.4473	0.4512
0.333438	0.5358	0.496	0.5066	0.5658	0.4608	0.5079	0.4093	0.3956	0.5257	0.3557	0.4157	0.4286	0.3716	0.423	0.4024	0.4161	0.4227	0.4258	0.541	0.4975	0.5151	0.5904	0.5746	0.5132	0.4847	0.579	0.4628	0.4575	0.5176	0.5029	0.592	0.4211	0.4949	0.5395	0.608	0.5103	0.5824	0.5641	0.5596	0.5322	0.5866	0.5338	0.4925	0.4317	0.4704	0.4537	0.5176	0.4493	0.448
0.416782	0.5332	0.4928	0.4994	0.5611	0.4589	0.5069	0.4074	0.3942	0.5301	0.3505	0.4147	0.4241	0.3695	0.4181	0.4087	0.4136	0.4158	0.4228	0.5342	0.4898	0.5106	0.5855	0.5718	0.5063	0.4844	0.5902	0.455	0.4548	0.5055	0.5023	0.5815	0.4189	0.4949	0.5338	0.5977	0.5109	0.5838	0.557	0.5573	0.5333	0.5826	0.5291	0.4896	0.4273	0.4673	0.454	0.5195	0.4471	0.4448
0.500013	0.537	0.4972	0.5001	0.5775	0.4632	0.5107	0.4103	0.3975	0.5365	0.3518	0.4213	0.4281	0.3708	0.4209	0.4118	0.418	0.4199	0.4255	0.5331	0.4882	0.5102	0.5909	0.577	0.5098	0.4892	0.5887	0.4681	0.4571	0.5058	0.5022	0.5951	0.4216	0.4995	0.5374	0.6024	0.5046	0.5836	0.5605	0.5608	0.5399	0.5901	0.5335	0.4923	0.4295	0.4698	0.457	0.5225	0.4489	0.4454
0.583437	0.5349	0.4969	0.5038	0.5787	0.465	0.5041	0.4091	0.3968	0.5267	0.3517	0.4153	0.4299	0.3692	0.4222	0.3996	0.4146	0.4196	0.4296	0.5379	0.4988	0.5121	0.5902	0.5792	0.5119	0.4876	0.5882	0.4652	0.456	0.5013	0.504	0.6011	0.4211	0.4979	0.5377	0.6007	0.4888	0.5845	0.5573	0.5623	0.538	0.577	0.5332	0.4938	0.4269	0.4689	0.4616	0.521	0.4488	0.4435
0.666713	0.5344	0.4964	0.5006	0.5816	0.4637	0.506	0.4108	0.3947	0.5309	0.3524	0.4147	0.4284	0.3672	0.4185	0.3989	0.4142	0.4204	0.4266	0.5284	0.5139	0.5225	0.5864	0.5831	0.5071	0.4859	0.5786	0.4623	0.4521	0.4901	0.5015	0.5831	0.4223	0.4933	0.5358	0.6038	0.49	0.5866	0.5574	0.5594	0.5408	0.5749	0.5297	0.4947	0.4278	0.4717	0.46	0.5162	0.4472	0.4429
0.750005	0.5389	0.4996	0.5078	0.5863	0.4651	0.5066	0.4133	0.3961	0.5285	0.3528	0.4131	0.4305	0.367	0.4191	0.4058	0.4138	0.4211	0.4315	0.5294	0.5063	0.5163	0.5867	0.5816	0.5086	0.4855	0.5886	0.4801	0.4543	0.4913	0.503	0.5773	0.423	0.497	0.5377	0.6074	0.494	0.5897	0.5556	0.5618	0.5357	0.5826	0.5311	0.4931	0.4267	0.4772	0.4611	0.5178	0.4477	0.4445
0.833405	0.5377	0.4992	0.5026	0.5866	0.4676	0.5089	0.4098	0.3982	0.5285	0.3521	0.4124	0.4318	0.3663	0.4162	0.3943	0.4089	0.4234	0.4334	0.5305	0.5025	0.5146	0.587	0.5848	0.5127	0.4854	0.5755	0.4665	0.4561	0.4926	0.503	0.5765	0.4244	0.4979	0.5386	0.6086	0.5018	0.5874	0.5531	0.5617	0.5275	0.5831	0.5318	0.4959	0.4256	0.4742	0.4635	0.5199	0.4472	0.4424
0.916745	0.5375	0.4996	0.5006	0.5848	0.4667	0.5107	0.4105	0.3983	0.5171	0.3556	0.4147	0.432	0.3647	0.4164	0.3977	0.4088	0.4241	0.4314	0.5214	0.5097	0.5192	0.5878	0.59	0.5115	0.4856	0.5729	0.4655	0.452	0.4906	0.5023	0.5683	0.4236	0.4975	0.5354	0.605	0.5095	0.5877	0.5538	0.5619	0.5285	0.5808	0.5305	0.4973	0.4244	0.4741	0.4651	0.5207	0.4476	0.4405
1.00004	0.537	0.4968	0.4967	0.5834	0.4654	0.5084	0.4104	0.3983	0.5157	0.3545	0.4153	0.4307	0.3624	0.4192	0.3906	0.4116	0.4275	0.4289	0.5177	0.517	0.5218	0.5836	0.5847	0.5068	0.4838	0.5855	0.4671	0.4526	0.488	0.5001	0.575	0.4227	0.4922	0.5329	0.6038	0.4999	0.5891	0.5502	0.5608	0.528	0.5776	0.5277	0.4951	0.4211	0.4707	0.4596	0.5192	0.4475	0.438
1.08337	0.5392	0.4993	0.5008	0.5877	0.4684	0.5135	0.4132	0.3993	0.515	0.3536	0.4166	0.4336	0.3631	0.4194	0.3877	0.4113	0.4288	0.4299	0.5153	0.514	0.5209	0.5853	0.5917	0.5074	0.4869	0.5737	0.4642	0.461	0.4832	0.4996	0.5794	0.4246	0.4959	0.5298	0.6052	0.4855	0.5904	0.5546	0.5637	0.5332	0.5807	0.5311	0.4954	0.4243	0.4705	0.4617	0.5186	0.4478	0.4436
1.16668	0.5408	0.4999	0.5072	0.5831	0.4664	0.5108	0.4217	0.399	0.5039	0.353	0.4117	0.4337	0.3615	0.4151	0.3998	0.4107	0.4319	0.4307	0.5074	0.5148	0.5175	0.5883	0.592	0.5098	0.4845	0.5692	0.4615	0.4532	0.4739	0.503	0.5815	0.4229	0.4969	0.5254	0.6054	0.4812	0.5895	0.5486	0.5672	0.5382	0.578	0.5309	0.4955	0.4292	0.4692	0.4604	0.5184	0.4478	0.4434
1.25001	0.5381	0.5003	0.5062	0.5901	0.4606	0.5091	0.4223	0.3965	0.504	0.3549	0.4105	0.4342	0.3612	0.4104	0.3937	0.4127	0.4371	0.4321	0.5002	0.5197	0.5204	0.5825	0.5965	0.5089	0.486	0.5805	0.4682	0.4498	0.4693	0.4994	0.5689	0.4215	0.4992	0.5208	0.602	0.4898	0.5891	0.5483	0.5636	0.5337	0.574	0.5292	0.4958	0.4237	0.4703	0.4602	0.5148	0.4479	0.4453
1.33341	0.5413	0.5005	0.5035	0.5813	0.4592	0.5074	0.4252	0.3955	0.4983	0.3554	0.4103	0.4351	0.362	0.4101	0.3882	0.4131	0.4335	0.4633	0.4984	0.5233	0.5192	0.582	0.5895	0.5111	0.485	0.5833	0.4755	0.46	0.4712	0.5003	0.5676	0.4225	0.5014	0.5206	0.6003	0.5012	0.589	0.5457	0.5632	0.5299	0.575	0.5316	0.4957	0.424	0.4697	0.4598	0.5152	0.4448	0.4417
1.41672	0.5442	0.5045	0.5022	0.5868	0.4646	0.5121	0.4237	0.3971	0.4955	0.3651	0.4215	0.4389	0.3629	0.4102	0.3902	0.4126	0.4322	0.4848	0.5021	0.5321	0.525	0.5883	0.6015	0.5142	0.489	0.5797	0.4778	0.4604	0.4769	0.503	0.5625	0.4252	0.5042	0.5256	0.6042	0.4882	0.5965	0.5505	0.5683	0.5341	0.5773	0.5325	0.4986	0.4257	0.4726	0.4628	0.5202	0.4467	0.4434
1.50003	0.5429	0.5038	0.5026	0.5803	0.4622	0.5171	0.4312	0.3963	0.4933	0.3626	0.4242	0.4363	0.3621	0.4048	0.3917	0.4086	0.4316	0.4575	0.4998	0.5224	0.5207	0.5853	0.5914	0.5123	0.4854	0.5721	0.4796	0.4601	0.4858	0.5021	0.5561	0.4237	0.5083	0.5234	0.6026	0.4797	0.5911	0.5492	0.5678	0.5343	0.5779	0.5282	0.4987	0.4251	0.473	0.4593	0.5186	0.446	0.4424
1.58338	0.5457	0.5047	0.5014	0.5825	0.4687	0.516	0.4251	0.3952	0.4904	0.3628	0.4214	0.4376	0.3631	0.4082	0.387	0.4035	0.4299	0.4414	0.4983	0.5203	0.5192	0.5862	0.5896	0.511	0.4867	0.5762	0.4857	0.455	0.4922	0.5024	0.5583	0.424	0.5027	0.5264	0.6039	0.4854	0.5944	0.5488	0.5694	0.5336	0.5788	0.53	0.4978	0.4258	0.471	0.4555	0.5187	0.4452	0.4426
1.66671	0.5468	0.508	0.5034	0.5814	0.4706	0.5214	0.4194	0.3983	0.4912	0.3665	0.4146	0.4395	0.3652	0.4062	0.3901	0.4051	0.4331	0.4398	0.5015	0.521	0.5166	0.5886	0.5893	0.5102	0.4888	0.5677	0.4856	0.4568	0.4992	0.5028	0.5607	0.4269	0.4983	0.5251	0.6058	0.4872	0.6046	0.5499	0.5702	0.5259	0.5862	0.5314	0.5005	0.4278	0.4742	0.4591	0.518	0.4469	0.4452
1.75005	0.5451	0.504	0.5038	0.5789	0.4708	0.5215	0.421	0.3962	0.487	0.3787	0.4131	0.4359	0.3627	0.3977	0.3913	0.4071	0.4305	0.4405	0.5022	0.5183	0.5192	0.5895	0.5896	0.5064	0.4874	0.5692	0.4821	0.4548	0.4835	0.5012	0.5587	0.4286	0.4961	0.524	0.603	0.4865	0.6055	0.5474	0.5699	0.538	0.5852	0.5278	0.4979	0.4265	0.4709	0.4554	0.5195	0.4462	0.4467
1.83348	0.547	0.5044	0.5048	0.5782	0.47	0.5204	0.417	0.396	0.4845	0.3964	0.4093	0.4373	0.3624	0.407	0.3926	0.4069	0.4296	0.4506	0.5019	0.5179	0.5178	0.5921	0.5873	0.502	0.489	0.5814	0.4796	0.4518	0.4885	0.4998	0.5586	0.4261	0.4987	0.5221	0.6076	0.4814	0.6017	0.5456	0.5705	0.5347	0.5868	0.5286	0.4986	0.4256	0.4705	0.4549	0.5201	0.445	0.4456
1.91676	0.5498	0.5053	0.5059	0.5786	0.4691	0.5197	0.4144	0.3957	0.4847	0.3905	0.4106	0.4381	0.3628	0.4002	0.3958	0.4084	0.43	0.4476	0.506	0.5142	0.5189	0.5953	0.5918	0.5103	0.4904	0.5848	0.4758	0.4552	0.4882	0.5018	0.5612	0.4277	0.4989	0.5301	0.6089	0.4821	0.6029	0.5483	0.5701	0.5369	0.5902	0.529	0.4984	0.426	0.4722	0.4523	0.5198	0.4466	0.4481
2.00007	0.5517	0.5083	0.5122	0.58	0.4706	0.518	0.4139	0.3979	0.4859	0.387	0.4066	0.4386	0.365	0.4017	0.3975	0.4104	0.4292	0.4437	0.5075	0.5248	0.5246	0.5937	0.5926	0.5132	0.491	0.5824	0.4759	0.4572	0.4978	0.5088	0.5644	0.4297	0.4995	0.5262	0.6071	0.4811	0.606	0.5479	0.5725	0.5452	0.5862	0.5302	0.5006	0.4285	0.4756	0.4558	0.5206	0.448	0.4536
2.08338	0.5495	0.5077	0.5101	0.5805	0.4698	0.5178	0.4164	0.3969	0.487	0.3797	0.4067	0.4385	0.3628	0.3943	0.3982	0.4137	0.4322	0.4378	0.5071	0.5294	0.526	0.5897	0.5881	0.5084	0.4908	0.5781	0.474	0.4568	0.5083	0.5072	0.5616	0.429	0.5001	0.5238	0.6078	0.4784	0.6034	0.5461	0.5728	0.5463	0.5844	0.5298	0.5029	0.4299	0.472	0.4497	0.5185	0.4461	0.4551
2.16675	0.5529	0.5085	0.5236	0.5811	0.4732	0.5167	0.4159	0.3978	0.4884	0.3752	0.4077	0.4383	0.3662	0.3954	0.3997	0.4183	0.4322	0.4354	0.509	0.5232	0.5226	0.5845	0.5854	0.5072	0.4909	0.5792	0.4741	0.457	0.4854	0.5083	0.5591	0.4303	0.4991	0.5256	0.6082	0.4795	0.6082	0.5439	0.5723	0.5435	0.5857	0.5302	0.5024	0.4308	0.475	0.4484	0.5153	0.4459	0.4592
2.25005	0.5524	0.5086	0.5245	0.5791	0.4756	0.5165	0.4136	0.395	0.4863	0.3853	0.4068	0.4381	0.3662	0.4078	0.4028	0.4302	0.4366	0.431	0.5079	0.5184	0.518	0.5839	0.5864	0.512	0.493	0.587	0.4715	0.457	0.4861	0.5082	0.5604	0.4299	0.4967	0.5215	0.608	0.4774	0.6028	0.5447	0.5739	0.5483	0.5862	0.5311	0.501	0.4302	0.4742	0.4488	0.5131	0.4453	0.4597
2.33339	0.5538	0.5088	0.5326	0.5816	0.4743	0.5166	0.4122	0.3966	0.4872	0.3899	0.4092	0.4426	0.3675	0.4085	0.404	0.4277	0.4383	0.4332	0.5062	0.522	0.5218	0.587	0.5884	0.5114	0.4939	0.5844	0.4742	0.4583	0.4777	0.5089	0.5628	0.4317	0.4976	0.5245	0.6083	0.4755	0.6009	0.5473	0.5749	0.5536	0.5872	0.5311	0.5023	0.4309	0.4705	0.448	0.5159	0.4462	0.458
2.41668	0.5555	0.5116	0.5438	0.581	0.4757	0.5213	0.4111	0.3977	0.4875	0.3861	0.4112	0.4424	0.3676	0.4063	0.4026	0.4292	0.4409	0.4313	0.5036	0.519	0.5236	0.5899	0.5881	0.5108	0.4932	0.5832	0.4732	0.4574	0.4757	0.5093	0.5675	0.4326	0.4969	0.529	0.6074	0.4771	0.6034	0.5466	0.5762	0.5584	0.588	0.53	0.5039	0.4342	0.4736	0.4451	0.5142	0.447	0.4574
2.50004	0.5531	0.5134	0.546	0.5784	0.4738	0.5196	0.4107	0.3969	0.4868	0.3828	0.4091	0.442	0.3675	0.4079	0.401	0.431	0.4385	0.4306	0.5051	0.5223	0.526	0.5928	0.5903	0.5107	0.4923	0.58	0.4721	0.4546	0.476	0.5049	0.5789	0.4335	0.4983	0.5235	0.6058	0.4766	0.6021	0.5439	0.5769	0.5543	0.5882	0.5304	0.5026	0.4318	0.474	0.4454	0.5153	0.4479	0.4543
2.58335	0.5557	0.5128	0.5336	0.5793	0.4745	0.5194	0.4101	0.3966	0.4871	0.3795	0.4087	0.4417	0.3684	0.4046	0.4027	0.429	0.4377	0.4356	0.5087	0.5265	0.5313	0.5931	0.5912	0.5113	0.4924	0.5857	0.4774	0.4553	0.4791	0.5014	0.5757	0.4329	0.4991	0.5235	0.6054	0.475	0.603	0.5458	0.5754	0.5463	0.5855	0.5296	0.5049	0.4324	0.4786	0.4431	0.5166	0.4472	0.4534
2.66673	0.5525	0.5132	0.5267	0.5787	0.4742	0.5218	0.4068	0.3937	0.4861	0.3785	0.4089	0.4407	0.3673	0.408	0.403	0.4299	0.4361	0.437	0.5087	0.5264	0.5284	0.5918	0.5903	0.5068	0.4929	0.5832	0.4755	0.4535	0.4749	0.5014	0.5805	0.4318	0.4952	0.5196	0.6057	0.4755	0.604	0.5423	0.5732	0.5477	0.5854	0.5257	0.5025	0.4338	0.477	0.4415	0.5166	0.4454	0.4533
2.7501	0.5528	0.5135	0.5235	0.5778	0.4751	0.5229	0.4077	0.3927	0.4856	0.3873	0.4122	0.4433	0.3679	0.4062	0.4061	0.4246	0.4394	0.4359	0.5102	0.524	0.5268	0.5901	0.5905	0.5032	0.4936	0.5819	0.4722	0.4516	0.4716	0.502	0.5767	0.4328	0.4944	0.5201	0.6066	0.4769	0.6065	0.5423	0.5736	0.5439	0.5865	0.5285	0.5023	0.434	0.4778	0.4418	0.5158	0.4443	0.4538
2.83341	0.553	0.518	0.5224	0.5777	0.4772	0.5261	0.4103	0.3946	0.4864	0.405	0.4153	0.4467	0.3713	0.4095	0.41	0.4274	0.4446	0.4379	0.5095	0.5245	0.5273	0.5894	0.5917	0.5049	0.4954	0.5855	0.4712	0.4522	0.4776	0.5062	0.5658	0.4353	0.4933	0.5226	0.6092	0.476	0.6059	0.5434	0.576	0.5364	0.5891	0.5278	0.5072	0.4346	0.4798	0.4512	0.5184	0.4463	0.455
2.91671	0.5495	0.5146	0.5181	0.577	0.4696	0.5254	0.406	0.3898	0.4852	0.3931	0.412	0.4469	0.3672	0.4083	0.405	0.4241	0.4386	0.4366	0.5055	0.517	0.5246	0.5836	0.5912	0.4969	0.4955	0.5771	0.4647	0.449	0.4702	0.5013	0.5615	0.4331	0.4899	0.5177	0.6058	0.4827	0.6012	0.5396	0.5726	0.5346	0.5867	0.527	0.5025	0.4326	0.4766	0.4423	0.5165	0.4445	0.4548
3.00005	0.5479	0.5117	0.5168	0.5747	0.4675	0.5242	0.4068	0.3894	0.4878	0.3923	0.4109	0.4462	0.3671	0.3993	0.4054	0.4176	0.4412	0.435	0.5048	0.5196	0.525	0.5843	0.587	0.4968	0.4932	0.5778	0.4635	0.4508	0.4719	0.5037	0.5668	0.4321	0.4918	0.5133	0.6049	0.4824	0.5982	0.5397	0.5727	0.539	0.5859	0.5246	0.501	0.4337	0.4736	0.4455	0.5126	0.4452	0.4579
3.08335	0.5557	0.5152	0.5239	0.577	0.4743	0.5246	0.4081	0.3958	0.4952	0.39	0.4131	0.451	0.3714	0.4116	0.4129	0.4221	0.4435	0.4395	0.5127	0.5294	0.5291	0.5917	0.5904	0.5036	0.4974	0.5798	0.4658	0.4534	0.4801	0.5069	0.5761	0.436	0.4937	0.5223	0.6073	0.4806	0.608	0.544	0.5782	0.5414	0.5906	0.5292	0.504	0.4381	0.478	0.448	0.5141	0.4497	0.4595
3.16668	0.555	0.5175	0.5195	0.5788	0.4707	0.5257	0.4117	0.3947	0.4935	0.3867	0.4138	0.4513	0.372	0.4068	0.4142	0.4208	0.4463	0.4369	0.5162	0.5311	0.5321	0.5869	0.592	0.5033	0.4991	0.5874	0.465	0.4517	0.4794	0.5078	0.5757	0.4363	0.492	0.5223	0.6106	0.4817	0.6107	0.5438	0.5781	0.5404	0.5866	0.5296	0.5068	0.4384	0.478	0.4474	0.5143	0.4495	0.4612
3.25007	0.5529	0.5175	0.5193	0.576	0.4719	0.5246	0.412	0.3924	0.4935	0.3734	0.4106	0.4501	0.3705	0.4092	0.4112	0.4226	0.4475	0.4338	0.5109	0.5324	0.5338	0.5855	0.5884	0.5009	0.4971	0.5821	0.464	0.4496	0.482	0.5044	0.5698	0.4345	0.495	0.5227	0.6082	0.4822	0.6079	0.5437	0.5782	0.5464	0.5832	0.5256	0.5064	0.4373	0.4784	0.453	0.5159	0.4491	0.4595
3.33343	0.5516	0.515	0.5143	0.5749	0.4695	0.5254	0.4084	0.3926	0.4929	0.3661	0.4109	0.4467	0.3692	0.4085	0.4083	0.417	0.4543	0.4334	0.5085	0.5279	0.5284	0.5861	0.5879	0.4995	0.4952	0.5754	0.4551	0.4477	0.4762	0.5019	0.565	0.4338	0.4897	0.5167	0.6063	0.4801	0.606	0.5423	0.5757	0.5443	0.5823	0.5262	0.5023	0.4356	0.4729	0.4472	0.5138	0.446	0.4583
3.41675	0.5519	0.5181	0.5161	0.5767	0.4702	0.5284	0.4077	0.3926	0.4956	0.3779	0.4136	0.4533	0.3715	0.4026	0.4092	0.4161	0.4497	0.4332	0.5057	0.5308	0.5302	0.5866	0.5912	0.5009	0.497	0.5766	0.4678	0.45	0.4725	0.5008	0.5645	0.4352	0.4922	0.5154	0.6083	0.4828	0.6117	0.5416	0.5757	0.5353	0.5865	0.5269	0.5052	0.4367	0.4738	0.444	0.5164	0.4472	0.4603
3.50007	0.5499	0.5165	0.5179	0.578	0.4686	0.5307	0.4068	0.3915	0.4939	0.3816	0.4149	0.4511	0.3694	0.3977	0.4101	0.4136	0.4462	0.433	0.5055	0.5273	0.5305	0.5827	0.5906	0.5012	0.4951	0.5796	0.4703	0.4487	0.4722	0.502	0.5635	0.4359	0.4893	0.5138	0.6071	0.4763	0.6108	0.5429	0.5775	0.5395	0.5873	0.5256	0.5047	0.4364	0.4745	0.4414	0.5173	0.4466	0.4599
3.5834	0.5501	0.517	0.5171	0.577	0.4665	0.5333	0.4048	0.3905	0.4938	0.3891	0.4189	0.4582	0.3696	0.3941	0.4069	0.4078	0.4505	0.431	0.5031	0.526	0.5301	0.5834	0.5886	0.5004	0.4955	0.5817	0.4677	0.4457	0.4719	0.5022	0.5673	0.4369	0.4887	0.5106	0.6054	0.4729	0.61	0.5416	0.5766	0.554	0.5873	0.5249	0.5052	0.436	0.4764	0.4402	0.5147	0.4461	0.4615
3.66676	0.5566	0.523	0.5204	0.5762	0.4715	0.536	0.4094	0.3905	0.4974	0.3813	0.4232	0.4597	0.3716	0.3905	0.4121	0.4088	0.4487	0.4368	0.4998	0.5276	0.5286	0.5891	0.5959	0.5057	0.4991	0.5829	0.4675	0.448	0.4669	0.5026	0.5674	0.4396	0.4896	0.5091	0.6124	0.4724	0.6156	0.5429	0.579	0.5559	0.6001	0.5191	0.5113	0.438	0.4785	0.4432	0.5126	0.4507	0.4661
3.75009	0.5548	0.5202	0.5195	0.5737	0.4674	0.5341	0.4076	0.3907	0.4977	0.3687	0.4264	0.456	0.3696	0.3895	0.4096	0.4078	0.4447	0.4357	0.496	0.5242	0.5272	0.5871	0.5947	0.5039	0.4977	0.5808	0.4639	0.4467	0.4648	0.4992	0.5627	0.4393	0.4875	0.5076	0.6107	0.4706	0.6112	0.5427	0.5776	0.554	0.6015	0.5174	0.5089	0.436	0.474	0.44	0.5084	0.4478	0.4679
3.83335	0.5544	0.5206	0.5197	0.5774	0.4638	0.5345	0.4062	0.3894	0.4994	0.3664	0.419	0.4512	0.3691	0.3857	0.4076	0.4079	0.4465	0.4342	0.4948	0.5209	0.5309	0.5896	0.5972	0.5063	0.4988	0.5774	0.4662	0.444	0.465	0.5005	0.562	0.4396	0.486	0.506	0.611	0.4705	0.6093	0.5421	0.5742	0.5503	0.6031	0.5192	0.5097	0.4359	0.4765	0.4388	0.5096	0.4469	0.4699
3.91669	0.5581	0.5257	0.5295	0.5792	0.472	0.5271	0.4102	0.3948	0.5042	0.3725	0.4182	0.4574	0.3716	0.3887	0.4056	0.4047	0.449	0.4385	0.5041	0.5309	0.5347	0.5951	0.5989	0.5106	0.5014	0.583	0.4732	0.4485	0.4703	0.5089	0.5719	0.4422	0.4904	0.5145	0.6118	0.4754	0.6155	0.5414	0.5868	0.5565	0.6011	0.5299	0.5133	0.4356	0.4752	0.4438	0.5127	0.4495	0.4686
4.00004	0.5573	0.5269	0.5292	0.5762	0.4744	0.5197	0.4104	0.3943	0.5047	0.3679	0.4178	0.4568	0.3718	0.3907	0.4019	0.4011	0.4578	0.4368	0.5089	0.5338	0.5356	0.5989	0.597	0.5148	0.5	0.5843	0.4725	0.4473	0.47	0.5099	0.5791	0.4447	0.4894	0.5171	0.6127	0.4745	0.6164	0.5381	0.5888	0.5503	0.6006	0.5337	0.5132	0.4349	0.4735	0.4426	0.5097	0.4487	0.4686
4.08343	0.5578	0.5278	0.5297	0.5727	0.4732	0.5176	0.4105	0.3916	0.5011	0.3647	0.419	0.4586	0.3708	0.3892	0.3952	0.3987	0.4514	0.4377	0.5039	0.5341	0.5346	0.5968	0.5953	0.5107	0.5004	0.5862	0.4727	0.4461	0.4668	0.5076	0.5825	0.4455	0.4877	0.5152	0.6142	0.4739	0.6194	0.5388	0.5859	0.5415	0.6057	0.528	0.5154	0.4327	0.4704	0.4402	0.5113	0.4505	0.4683
4.16672	0.5553	0.5253	0.5263	0.5823	0.4702	0.5297	0.4122	0.3893	0.5001	0.3649	0.4181	0.4556	0.3708	0.3887	0.391	0.4032	0.4531	0.438	0.4986	0.5377	0.5351	0.5951	0.5982	0.5058	0.5007	0.5834	0.4706	0.4453	0.466	0.5058	0.575	0.4451	0.4859	0.5072	0.6152	0.4758	0.6176	0.5417	0.5809	0.5449	0.6107	0.5204	0.513	0.4347	0.4754	0.4404	0.5139	0.45	0.4666
4.2501	0.5572	0.5271	0.5259	0.5795	0.4678	0.5283	0.4121	0.3894	0.4999	0.3637	0.4203	0.4578	0.3712	0.3851	0.389	0.3981	0.4602	0.4361	0.4981	0.5375	0.5347	0.5903	0.5985	0.5063	0.499	0.5867	0.4701	0.4453	0.4618	0.5053	0.5734	0.445	0.4852	0.5054	0.6148	0.4772	0.6157	0.5404	0.581	0.548	0.6093	0.5192	0.5122	0.4348	0.4737	0.441	0.5151	0.4513	0.465
4.33339	0.5591	0.5277	0.529	0.5837	0.4709	0.533	0.4144	0.3913	0.5013	0.3634	0.4242	0.4612	0.3732	0.3889	0.3894	0.3978	0.4583	0.4398	0.4952	0.5402	0.5365	0.59	0.5982	0.5136	0.5033	0.5881	0.4716	0.4459	0.4687	0.5066	0.5801	0.4457	0.4865	0.508	0.617	0.4743	0.6195	0.544	0.5826	0.5467	0.6124	0.5205	0.5142	0.4361	0.4768	0.4442	0.5164	0.4529	0.4651
4.41675	0.5574	0.5301	0.5263	0.5803	0.4694	0.531	0.4146	0.389	0.4973	0.3623	0.4171	0.4572	0.373	0.3833	0.386	0.3967	0.4537	0.4397	0.4915	0.5379	0.5367	0.5888	0.5966	0.5155	0.5026	0.5825	0.4679	0.445	0.4655	0.5066	0.5772	0.4444	0.4867	0.5064	0.6144	0.476	0.6176	0.5428	0.5837	0.5469	0.6119	0.5207	0.5142	0.435	0.4767	0.446	0.518	0.4529	0.4643
4.50007	0.5558	0.5348	0.5303	0.5817	0.4702	0.5334	0.4167	0.3896	0.4968	0.3619	0.4199	0.4545	0.3729	0.3806	0.3888	0.3982	0.4495	0.44	0.4931	0.5388	0.5387	0.5866	0.6006	0.5145	0.503	0.5812	0.4621	0.4451	0.4748	0.5044	0.5785	0.4455	0.488	0.5065	0.6163	0.4761	0.6168	0.5428	0.5839	0.5496	0.608	0.5221	0.5155	0.437	0.4809	0.4431	0.516	0.4509	0.4654
4.58337	0.5581	0.5357	0.5302	0.5842	0.4711	0.5322	0.4176	0.391	0.4958	0.3643	0.4244	0.454	0.3734	0.3806	0.3897	0.3996	0.4503	0.4414	0.5014	0.5398	0.5379	0.5882	0.601	0.5195	0.5034	0.5844	0.4644	0.4464	0.4667	0.5057	0.578	0.4484	0.4881	0.5061	0.6156	0.4762	0.6184	0.5432	0.5827	0.5454	0.607	0.5201	0.5148	0.4378	0.4825	0.4432	0.5144	0.4512	0.465
4.66676	0.5587	0.5356	0.5321	0.5871	0.4755	0.5333	0.4189	0.3919	0.4966	0.3704	0.4242	0.4551	0.3735	0.3823	0.3944	0.4001	0.4503	0.4408	0.5049	0.5384	0.5373	0.5888	0.6011	0.5243	0.5035	0.5807	0.4647	0.4474	0.4685	0.5062	0.5708	0.4501	0.4886	0.5061	0.6175	0.4732	0.6193	0.544	0.586	0.5414	0.6082	0.5251	0.5177	0.438	0.4834	0.4414	0.5146	0.4524	0.4673
4.75009	0.5593	0.5341	0.5358	0.5838	0.4793	0.534	0.4237	0.3918	0.4955	0.3695	0.4287	0.4562	0.3737	0.3837	0.3979	0.3996	0.4481	0.4378	0.5087	0.5356	0.5485	0.5906	0.6011	0.5255	0.5027	0.5796	0.4639	0.4455	0.4656	0.5052	0.5716	0.4481	0.4921	0.5074	0.6204	0.474	0.6168	0.5441	0.5872	0.5392	0.6076	0.5235	0.5185	0.4392	0.4808	0.4451	0.5143	0.4529	0.4657
4.83338	0.5579	0.5298	0.533	0.5793	0.4755	0.5344	0.4177	0.388	0.4928	0.3665	0.4233	0.4549	0.3714	0.3824	0.3911	0.3978	0.4488	0.4353	0.5073	0.53	0.5378	0.5866	0.5965	0.5184	0.5017	0.5735	0.463	0.445	0.4657	0.5017	0.5693	0.4454	0.487	0.5049	0.6181	0.4709	0.6113	0.5409	0.5824	0.5341	0.6017	0.5211	0.5137	0.435	0.4802	0.4432	0.5114	0.4507	0.4613
4.91674	0.5557	0.5297	0.5337	0.581	0.4729	0.5372	0.4171	0.3908	0.4914	0.3667	0.4255	0.4576	0.3708	0.3822	0.3875	0.398	0.4477	0.434	0.5068	0.5267	0.5351	0.5827	0.5974	0.5171	0.501	0.5792	0.4651	0.4454	0.4646	0.5038	0.5727	0.4465	0.4866	0.5058	0.6172	0.4705	0.6109	0.5428	0.5808	0.5329	0.6023	0.5204	0.5142	0.4361	0.4783	0.4449	0.5107	0.4499	0.459
5.00007	0.5635	0.5313	0.5409	0.58	0.4772	0.5327	0.4194	0.3917	0.4918	0.3696	0.4243	0.4609	0.3723	0.3906	0.3893	0.3986	0.4497	0.436	0.5088	0.529	0.5334	0.5839	0.597	0.527	0.5039	0.5773	0.4706	0.4487	0.4704	0.5055	0.5768	0.4507	0.4888	0.5077	0.6217	0.4709	0.6131	0.5425	0.5885	0.5406	0.6047	0.521	0.516	0.4373	0.4802	0.4465	0.5126	0.4536	0.4615
5.08338	0.5592	0.5337	0.5375	0.5811	0.4759	0.5321	0.4185	0.3892	0.4914	0.3691	0.422	0.4592	0.3705	0.3922	0.3951	0.4012	0.4504	0.4361	0.5055	0.5299	0.5357	0.5845	0.5983	0.5231	0.5031	0.5774	0.466	0.4467	0.4663	0.5057	0.5766	0.4496	0.488	0.508	0.6186	0.4741	0.6195	0.5425	0.5857	0.5361	0.6033	0.522	0.517	0.4387	0.4809	0.4431	0.5142	0.4536	0.4598
5.16673	0.5584	0.5379	0.5382	0.5851	0.4768	0.5333	0.4211	0.3905	0.4909	0.3765	0.4227	0.4616	0.3721	0.3956	0.4014	0.4032	0.4516	0.441	0.5042	0.5317	0.5353	0.5894	0.601	0.5187	0.5063	0.579	0.467	0.4484	0.4668	0.5088	0.58	0.4517	0.4891	0.5105	0.6207	0.4803	0.6236	0.5437	0.5884	0.5372	0.605	0.5267	0.5206	0.4396	0.4825	0.4454	0.5172	0.4553	0.4643
5.25011	0.5597	0.5365	0.5384	0.5827	0.4772	0.5297	0.4163	0.3905	0.4909	0.3747	0.4204	0.4612	0.372	0.4016	0.4006	0.4029	0.4524	0.4387	0.5001	0.5306	0.5316	0.5881	0.5999	0.5186	0.5056	0.5788	0.4645	0.4469	0.4647	0.507	0.577	0.451	0.4876	0.5094	0.6216	0.4802	0.6222	0.5464	0.5885	0.5406	0.6078	0.5261	0.5186	0.4404	0.4819	0.4471	0.5151	0.4553	0.4606
5.33333	0.5598	0.5356	0.5378	0.5839	0.476	0.5327	0.4196	0.3889	0.4952	0.3699	0.4177	0.4625	0.3721	0.4012	0.402	0.4004	0.4567	0.4393	0.498	0.5304	0.5334	0.585	0.5988	0.5192	0.5068	0.585	0.4672	0.447	0.4642	0.5067	0.5786	0.4511	0.4899	0.508	0.6208	0.4835	0.6242	0.5423	0.5901	0.5525	0.6097	0.5248	0.5188	0.4404	0.4818	0.4469	0.5146	0.4552	0.4602
5.41673	0.5634	0.5369	0.5418	0.582	0.4809	0.5341	0.4182	0.3907	0.4967	0.3693	0.4175	0.4647	0.3749	0.4043	0.395	0.4009	0.4595	0.4383	0.4995	0.5341	0.5316	0.5856	0.601	0.5226	0.5096	0.5888	0.466	0.4487	0.4649	0.5092	0.5801	0.453	0.487	0.5137	0.6225	0.4883	0.6296	0.5428	0.5915	0.5553	0.6093	0.5266	0.5202	0.4415	0.4802	0.4513	0.5148	0.4555	0.4593
5.50007	0.5638	0.5351	0.5379	0.5786	0.4752	0.5323	0.4182	0.3868	0.4951	0.3769	0.4169	0.4616	0.3732	0.407	0.3932	0.3999	0.4594	0.4381	0.4959	0.53	0.5292	0.5851	0.5992	0.519	0.5065	0.5875	0.4628	0.4475	0.4648	0.5104	0.5818	0.4518	0.4845	0.5109	0.6209	0.4936	0.6276	0.5426	0.5879	0.5503	0.6083	0.5249	0.5187	0.4386	0.4787	0.4509	0.5164	0.4543	0.4555
5.58337	0.5644	0.5374	0.5375	0.5811	0.4771	0.5317	0.4197	0.3906	0.4971	0.3791	0.4191	0.4645	0.3732	0.4122	0.3958	0.4035	0.4649	0.4383	0.4948	0.533	0.5324	0.5861	0.6014	0.5189	0.5079	0.5858	0.4666	0.4489	0.4645	0.5103	0.5806	0.453	0.4863	0.512	0.6224	0.4998	0.631	0.542	0.5909	0.5587	0.6074	0.526	0.5207	0.4409	0.4799	0.4525	0.5193	0.4532	0.4597
5.66672	0.5627	0.539	0.5353	0.5795	0.4782	0.5324	0.4192	0.3891	0.499	0.3812	0.4182	0.464	0.3725	0.4198	0.4001	0.4087	0.4631	0.4365	0.4917	0.5298	0.5317	0.5828	0.6009	0.5146	0.5067	0.5833	0.4639	0.4475	0.4661	0.5094	0.5793	0.4526	0.4864	0.5065	0.6201	0.4993	0.6287	0.5398	0.5891	0.553	0.6039	0.5236	0.5188	0.4383	0.4792	0.4509	0.5203	0.4549	0.4602
5.75004	0.5752	0.5459	0.5428	0.5753	0.4854	0.5296	0.416	0.3914	0.5029	0.3977	0.4162	0.4684	0.3754	0.433	0.4185	0.4118	0.4664	0.441	0.4927	0.5315	0.522	0.5891	0.6038	0.5214	0.5092	0.5849	0.4711	0.4493	0.4705	0.5144	0.5874	0.4569	0.4882	0.5122	0.6318	0.496	0.6412	0.5426	0.5943	0.5461	0.6155	0.5212	0.5243	0.4406	0.4796	0.4564	0.5196	0.4598	0.4621
5.83332	0.5677	0.5444	0.5375	0.5819	0.4811	0.5357	0.4187	0.3942	0.4995	0.4034	0.4205	0.4663	0.3762	0.4354	0.4204	0.4217	0.4602	0.44	0.4909	0.5295	0.5317	0.5845	0.6055	0.5167	0.5111	0.5856	0.4696	0.4512	0.4715	0.5264	0.5806	0.4569	0.4896	0.5088	0.6262	0.5034	0.6373	0.545	0.5937	0.5579	0.6153	0.5238	0.5247	0.4447	0.4812	0.4584	0.5166	0.4594	0.4644
5.91672	0.5702	0.5481	0.5448	0.5788	0.48	0.5328	0.4171	0.3945	0.5015	0.4001	0.4228	0.4643	0.3753	0.4423	0.4198	0.4248	0.466	0.4402	0.49	0.5313	0.5298	0.5869	0.6057	0.516	0.5109	0.5872	0.469	0.4513	0.473	0.5597	0.586	0.4558	0.4899	0.5105	0.6271	0.5057	0.6382	0.5463	0.5941	0.5575	0.613	0.5242	0.5253	0.4436	0.4849	0.4579	0.5167	0.4616	0.4622
6.00013	0.5654	0.5486	0.5954	0.584	0.4782	0.5363	0.4168	0.3953	0.4995	0.394	0.4236	0.4619	0.3737	0.4542	0.4221	0.428	0.4625	0.4396	0.491	0.5331	0.5328	0.5856	0.6044	0.5137	0.5098	0.5862	0.4649	0.4493	0.4718	0.5783	0.5966	0.4539	0.4889	0.5049	0.6307	0.5043	0.6329	0.5451	0.5928	0.5701	0.6101	0.5225	0.5249	0.4433	0.489	0.4596	0.5167	0.4582	0.4632
6.08342	0.5649	0.5431	0.5881	0.5776	0.4777	0.5349	0.4131	0.4062	0.4954	0.3961	0.4284	0.4612	0.3724	0.4722	0.4216	0.427	0.4625	0.4398	0.4888	0.5297	0.5284	0.5854	0.5999	0.5155	0.507	0.584	0.4639	0.4478	0.4738	0.5607	0.6022	0.4528	0.483	0.5057	0.6373	0.5038	0.6305	0.5412	0.5914	0.5667	0.6091	0.5206	0.5235	0.4414	0.4887	0.4583	0.5155	0.456	0.4613
6.16673	0.5674	0.5483	0.5855	0.5834	0.4858	0.5481	0.4233	0.4515	0.4991	0.4165	0.4481	0.467	0.3769	0.4729	0.4264	0.4378	0.4691	0.4426	0.4913	0.5334	0.5338	0.5907	0.6078	0.5288	0.5118	0.5892	0.4671	0.4511	0.4731	0.6053	0.6212	0.4541	0.4867	0.5121	0.6582	0.5098	0.6343	0.5437	0.5969	0.5721	0.6147	0.5231	0.5256	0.4422	0.4928	0.4632	0.5189	0.461	0.4656
6.25008	0.5671	0.5441	0.5834	0.5842	0.488	0.5643	0.4299	0.4749	0.5002	0.4283	0.4735	0.4671	0.3758	0.4773	0.4298	0.446	0.467	0.4518	0.4927	0.5335	0.5349	0.589	0.6089	0.5279	0.5128	0.591	0.4671	0.452	0.4762	0.591	0.6264	0.4538	0.4881	0.5107	0.6516	0.5088	0.6349	0.543	0.5957	0.5776	0.6156	0.5249	0.5273	0.4443	0.4944	0.468	0.5199	0.4603	0.4632
6.33332	0.5651	0.5468	0.6001	0.5819	0.4911	0.5652	0.464	0.4939	0.4986	0.4338	0.4607	0.4672	0.3757	0.4843	0.4396	0.473	0.4733	0.4836	0.489	0.532	0.5435	0.5878	0.6087	0.5281	0.5104	0.5953	0.4658	0.4495	0.4705	0.6099	0.6268	0.4516	0.4861	0.5125	0.6675	0.5052	0.6339	0.5454	0.5955	0.5748	0.6144	0.5212	0.5248	0.4461	0.4928	0.4852	0.5186	0.4603	0.4646
6.41678	0.5615	0.5444	0.5951	0.5895	0.4957	0.5828	0.4628	0.5099	0.4979	0.4416	0.4686	0.466	0.3751	0.4818	0.4526	0.5167	0.4769	0.5325	0.4924	0.5353	0.5591	0.5862	0.6148	0.5295	0.5108	0.5943	0.4671	0.4578	0.4727	0.6089	0.6275	0.4533	0.4862	0.5135	0.6687	0.5064	0.6328	0.5463	0.5923	0.583	0.6108	0.5219	0.5242	0.455	0.4943	0.5218	0.5203	0.463	0.4674
6.50005	0.5642	0.5462	0.5996	0.6007	0.518	0.5859	0.4678	0.5189	0.5005	0.4531	0.4969	0.4707	0.377	0.4724	0.451	0.5095	0.4829	0.5388	0.4949	0.5409	0.5641	0.5881	0.6137	0.5322	0.5124	0.5962	0.4696	0.46	0.4702	0.6141	0.6312	0.4637	0.488	0.527	0.6762	0.5058	0.6399	0.548	0.5952	0.5851	0.6135	0.5233	0.5265	0.5192	0.4968	0.5204	0.5242	0.4673	0.4696
6.58334	0.5632	0.5451	0.5965	0.6028	0.5629	0.5999	0.4748	0.5159	0.5003	0.4707	0.5006	0.4721	0.3783	0.4604	0.4423	0.4928	0.4839	0.5462	0.4946	0.5408	0.5655	0.59	0.6285	0.5343	0.5105	0.5928	0.472	0.4727	0.4722	0.6193	0.6252	0.4823	0.4885	0.538	0.6872	0.5039	0.6399	0.5473	0.5971	0.5876	0.6136	0.5222	0.5248	0.4998	0.4963	0.5242	0.5209	0.5206	0.4727
6.66675	0.5587	0.5482	0.5912	0.6379	0.5671	0.6141	0.4817	0.513	0.5006	0.4675	0.5074	0.47	0.3814	0.4477	0.4368	0.4834	0.4945	0.5517	0.4937	0.5412	0.5769	0.5915	0.6402	0.5366	0.513	0.5906	0.4681	0.5118	0.4688	0.6146	0.6257	0.4856	0.4887	0.5483	0.6924	0.506	0.6368	0.5462	0.5967	0.5897	0.6127	0.5225	0.5276	0.5077	0.4977	0.5217	0.5226	0.524	0.475
6.75002	0.563	0.5472	0.5913	0.649	0.5794	0.6162	0.4729	0.5105	0.5026	0.4686	0.5005	0.4753	0.3837	0.4458	0.4259	0.4636	0.4987	0.557	0.4952	0.541	0.5725	0.5892	0.6367	0.5428	0.5125	0.5894	0.4693	0.5093	0.4725	0.6174	0.64	0.4825	0.4901	0.5623	0.7051	0.5021	0.6387	0.549	0.5996	0.5868	0.6176	0.5246	0.5288	0.5043	0.499	0.5244	0.5196	0.5342	0.4739
6.83336	0.5635	0.5497	0.584	0.6501	0.5797	0.6165	0.4723	0.5041	0.5047	0.4711	0.4979	0.4784	0.3842	0.4416	0.4158	0.4513	0.5018	0.5633	0.5001	0.5427	0.573	0.5921	0.6402	0.5475	0.5147	0.5906	0.4704	0.5231	0.4724	0.6181	0.65	0.4862	0.492	0.5625	0.7028	0.5027	0.6387	0.5501	0.6015	0.587	0.6221	0.5292	0.5363	0.5231	0.5188	0.5278	0.5178	0.5347	0.482
6.91673	0.5622	0.5483	0.5794	0.6562	0.573	0.6116	0.464	0.4898	0.5058	0.4689	0.4882	0.4789	0.383	0.4362	0.4084	0.4365	0.5089	0.5623	0.4986	0.5394	0.5693	0.5895	0.6559	0.5461	0.5138	0.5873	0.467	0.5284	0.4711	0.617	0.6497	0.4869	0.4907	0.5611	0.6946	0.4988	0.6378	0.5489	0.6048	0.5844	0.6201	0.533	0.5519	0.5242	0.5502	0.5286	0.521	0.5388	0.5194
7.00007	0.5611	0.5498	0.572	0.6625	0.5609	0.6193	0.4601	0.4767	0.5054	0.4695	0.4853	0.478	0.3892	0.4348	0.4068	0.4315	0.5207	0.5669	0.5028	0.5433	0.5768	0.5912	0.6738	0.5437	0.5177	0.5879	0.4693	0.532	0.4749	0.6189	0.6511	0.4879	0.4932	0.5579	0.6884	0.5016	0.6343	0.5527	0.606	0.5874	0.6204	0.5393	0.555	0.5222	0.565	0.5316	0.5255	0.5417	0.5878
7.08335	0.5585	0.5574	0.571	0.6544	0.5503	0.6153	0.4484	0.4569	0.503	0.4624	0.4753	0.4769	0.3871	0.4335	0.4027	0.4253	0.5234	0.5648	0.5033	0.5411	0.5714	0.5893	0.6733	0.5423	0.5197	0.5835	0.4689	0.5282	0.4767	0.618	0.6475	0.491	0.4913	0.5502	0.6812	0.4969	0.6379	0.549	0.6098	0.5828	0.6173	0.5444	0.5473	0.5173	0.5522	0.5276	0.5333	0.5365	0.5664
7.16671	0.5627	0.5814	0.5707	0.648	0.5431	0.6172	0.4456	0.4502	0.5058	0.4605	0.4698	0.4829	0.3934	0.4393	0.4032	0.4268	0.5327	0.5703	0.506	0.5443	0.5747	0.5901	0.6799	0.5456	0.5364	0.5842	0.4698	0.5287	0.4821	0.6202	0.6531	0.4956	0.4924	0.547	0.6776	0.4982	0.6409	0.5578	0.6106	0.5803	0.6193	0.5492	0.5515	0.5153	0.5621	0.5289	0.5897	0.536	0.6011
7.25006	0.5575	0.5842	0.5626	0.6329	0.529	0.6114	0.438	0.4372	0.5	0.4493	0.4599	0.4817	0.3898	0.4369	0.3994	0.4222	0.5266	0.5661	0.5057	0.5393	0.5671	0.5863	0.6578	0.5397	0.5486	0.5789	0.4674	0.5194	0.4764	0.6119	0.6497	0.4942	0.4937	0.5322	0.6639	0.4935	0.6344	0.5691	0.6045	0.5732	0.6134	0.5495	0.5504	0.5026	0.5352	0.5237	0.593	0.5281	0.5743
7.3334	0.5598	0.5928	0.5572	0.6271	0.5207	0.619	0.434	0.433	0.5012	0.4466	0.4582	0.4846	0.4005	0.4382	0.4004	0.4242	0.5311	0.5696	0.5093	0.5422	0.5708	0.5862	0.6671	0.5414	0.5507	0.5796	0.4698	0.5182	0.4816	0.6088	0.6469	0.4996	0.4971	0.5279	0.6586	0.4915	0.632	0.582	0.611	0.5742	0.6158	0.5492	0.5496	0.4991	0.5482	0.5233	0.5839	0.5251	0.5956
7.41675	0.556	0.5925	0.5549	0.6146	0.5145	0.6131	0.4298	0.4274	0.4989	0.4334	0.4563	0.485	0.401	0.4376	0.3992	0.4227	0.5313	0.568	0.51	0.539	0.5695	0.5869	0.6714	0.5367	0.5525	0.5771	0.4679	0.5079	0.4806	0.6024	0.6467	0.4973	0.4925	0.5204	0.6535	0.4916	0.6302	0.5838	0.6101	0.5716	0.6137	0.5494	0.5465	0.4892	0.5407	0.5095	0.6002	0.5164	0.5905
7.50007	0.5572	0.5998	0.5571	0.6041	0.5145	0.6134	0.4301	0.4278	0.4991	0.4289	0.4582	0.4876	0.4089	0.4382	0.4021	0.4216	0.5345	0.5709	0.5111	0.5421	0.5705	0.5877	0.6744	0.5362	0.5633	0.5782	0.4699	0.4994	0.4814	0.5968	0.6463	0.4987	0.5012	0.5182	0.6524	0.49	0.6311	0.5791	0.6131	0.5716	0.6164	0.5496	0.5464	0.4801	0.5303	0.5012	0.6052	0.509	0.591
7.58346	0.5535	0.5972	0.5568	0.5953	0.5093	0.6069	0.4296	0.4269	0.4974	0.4238	0.4561	0.4845	0.433	0.436	0.4017	0.4198	0.5331	0.5671	0.5084	0.5362	0.5657	0.5879	0.6731	0.5343	0.5612	0.5718	0.4665	0.4878	0.479	0.5899	0.6421	0.4996	0.5155	0.5152	0.6514	0.4853	0.6276	0.5867	0.6125	0.5684	0.611	0.5509	0.5416	0.4717	0.5227	0.495	0.62	0.5006	0.5827
7.66679	0.5553	0.6031	0.5619	0.5908	0.5099	0.6092	0.4329	0.4326	0.4997	0.4218	0.4638	0.4853	0.4448	0.4376	0.4059	0.4219	0.5355	0.5729	0.5122	0.5378	0.5688	0.5885	0.6657	0.5341	0.5607	0.5719	0.4709	0.4771	0.482	0.5887	0.6442	0.4998	0.545	0.5138	0.6549	0.4853	0.6263	0.5829	0.6118	0.5684	0.6151	0.5524	0.543	0.4694	0.512	0.5002	0.631	0.499	0.586
7.75004	0.5568	0.6035	0.5685	0.5808	0.504	0.6026	0.4284	0.4333	0.4977	0.4161	0.4581	0.4874	0.4507	0.4404	0.4046	0.4204	0.5362	0.5728	0.5135	0.5376	0.5617	0.594	0.6683	0.5349	0.5553	0.572	0.4706	0.4671	0.4852	0.59	0.6473	0.499	0.5461	0.5112	0.653	0.4812	0.6295	0.5871	0.6127	0.5682	0.6167	0.555	0.537	0.464	0.5003	0.5046	0.6368	0.4959	0.5777
7.83338	0.5533	0.6075	0.5652	0.5823	0.4983	0.6051	0.4279	0.4342	0.4983	0.4115	0.4614	0.4846	0.4502	0.4417	0.408	0.4247	0.5353	0.5721	0.5133	0.5368	0.5668	0.5948	0.666	0.5317	0.555	0.5692	0.469	0.4637	0.4948	0.5843	0.6414	0.5012	0.5803	0.5069	0.6521	0.4816	0.623	0.5951	0.6099	0.5667	0.6106	0.5603	0.5376	0.464	0.5003	0.504	0.6431	0.4961	0.5721
7.91667	0.5532	0.6116	0.5661	0.584	0.4991	0.6075	0.4289	0.4365	0.5011	0.4073	0.4602	0.4851	0.44	0.4412	0.4092	0.4245	0.5349	0.5711	0.515	0.5374	0.5696	0.5964	0.6595	0.53	0.5519	0.5707	0.4664	0.4645	0.5283	0.5831	0.6383	0.4988	0.5715	0.5061	0.6537	0.4824	0.6254	0.5977	0.6078	0.5679	0.6102	0.5645	0.5364	0.4646	0.4971	0.5088	0.6447	0.4951	0.5598
8.00009	0.5488	0.61	0.5639	0.5791	0.4956	0.6031	0.4259	0.434	0.4973	0.3997	0.4584	0.4798	0.4428	0.4404	0.406	0.4223	0.5307	0.5681	0.5128	0.533	0.5657	0.5945	0.666	0.5263	0.5463	0.5666	0.4638	0.4621	0.5484	0.5749	0.6334	0.4949	0.5493	0.5025	0.6563	0.4774	0.6183	0.594	0.6023	0.564	0.6054	0.5633	0.5316	0.4621	0.4911	0.5104	0.65	0.4925	0.5419
8.0834	0.5523	0.6157	0.5702	0.5859	0.4963	0.6078	0.4282	0.4386	0.501	0.3983	0.4629	0.481	0.44	0.4439	0.409	0.4233	0.531	0.5705	0.5166	0.5369	0.5689	0.5989	0.667	0.5294	0.5471	0.5705	0.4687	0.4674	0.5243	0.5652	0.6334	0.497	0.5628	0.5043	0.6646	0.4801	0.6202	0.5947	0.602	0.5687	0.6076	0.57	0.5335	0.4648	0.4928	0.518	0.6453	0.4961	0.5297
8.16667	0.5503	0.6127	0.5744	0.5886	0.4962	0.6043	0.4304	0.4353	0.5009	0.3989	0.4671	0.4792	0.4317	0.4449	0.4065	0.4242	0.5274	0.5697	0.5169	0.5387	0.5716	0.5955	0.6648	0.5256	0.5445	0.5671	0.467	0.4656	0.5088	0.5549	0.6304	0.4988	0.5846	0.5034	0.6566	0.4781	0.6168	0.5932	0.6009	0.5696	0.6061	0.5748	0.5329	0.4648	0.4938	0.5178	0.6545	0.4948	0.5242
8.25	0.5518	0.6149	0.5787	0.5926	0.5002	0.6001	0.4274	0.4355	0.5004	0.399	0.4661	0.4802	0.4274	0.4514	0.4062	0.4313	0.5266	0.5682	0.5179	0.5388	0.5719	0.5952	0.6652	0.5286	0.5449	0.5712	0.4713	0.4671	0.5235	0.5487	0.6276	0.4983	0.5734	0.5038	0.6538	0.4804	0.6176	0.588	0.5993	0.5673	0.6061	0.5813	0.5334	0.4688	0.4969	0.5242	0.652	0.4974	0.515
8.3334	0.5504	0.6114	0.5791	0.5883	0.4963	0.5898	0.4278	0.4432	0.4976	0.3986	0.4659	0.4789	0.4199	0.4558	0.4037	0.4287	0.522	0.5653	0.517	0.5372	0.5682	0.5963	0.6603	0.5275	0.5409	0.5691	0.4708	0.4676	0.5242	0.5457	0.6264	0.4958	0.5631	0.5032	0.6593	0.4789	0.614	0.5804	0.5994	0.5631	0.6043	0.5852	0.53	0.4706	0.4958	0.5234	0.6545	0.4956	0.5156
8.41675	0.5504	0.6127	0.5781	0.5912	0.4957	0.5925	0.4286	0.457	0.4986	0.4017	0.467	0.4788	0.4137	0.456	0.4039	0.4299	0.5229	0.5683	0.5169	0.5359	0.5679	0.5947	0.6547	0.5271	0.5421	0.566	0.4714	0.4688	0.5364	0.5469	0.6223	0.4976	0.5614	0.5038	0.6685	0.4788	0.6127	0.5733	0.5962	0.5652	0.6068	0.5903	0.5288	0.4749	0.4997	0.5243	0.6643	0.4984	0.5181
8.5001	0.5501	0.6102	0.5791	0.595	0.4999	0.594	0.4277	0.4583	0.4975	0.4053	0.4701	0.4789	0.4088	0.4574	0.4051	0.431	0.5207	0.568	0.5169	0.5372	0.5727	0.5979	0.6559	0.527	0.5435	0.5656	0.4712	0.4708	0.5431	0.5431	0.6191	0.4985	0.5546	0.5008	0.6727	0.4808	0.6101	0.5672	0.5958	0.5667	0.6076	0.595	0.5321	0.4791	0.501	0.5231	0.6655	0.5033	0.5183
8.58343	0.5513	0.6116	0.5784	0.5928	0.4967	0.5921	0.425	0.4616	0.5006	0.4031	0.4687	0.4795	0.4069	0.4556	0.4054	0.428	0.5225	0.566	0.5172	0.5378	0.5708	0.6022	0.6538	0.5263	0.545	0.5686	0.4742	0.4714	0.5361	0.5441	0.6178	0.4985	0.5467	0.5024	0.6749	0.4799	0.609	0.5639	0.597	0.5653	0.6098	0.5961	0.5323	0.4783	0.5023	0.5224	0.6684	0.504	0.523
8.66668	0.5526	0.6107	0.5819	0.5944	0.4989	0.5916	0.4264	0.4633	0.5048	0.4066	0.4667	0.4815	0.4053	0.4601	0.4073	0.4314	0.5239	0.5686	0.5173	0.5413	0.5716	0.6069	0.6528	0.5286	0.5466	0.5717	0.4755	0.4746	0.5485	0.5457	0.6164	0.4997	0.5448	0.5039	0.6845	0.4808	0.6132	0.5632	0.5971	0.5672	0.6108	0.6016	0.5323	0.4823	0.504	0.5218	0.6733	0.5069	0.5269
8.75005	0.5537	0.6142	0.5913	0.5969	0.4997	0.5975	0.4278	0.4624	0.5059	0.4068	0.4682	0.4832	0.4024	0.4593	0.4085	0.4314	0.5253	0.5722	0.517	0.5423	0.572	0.6096	0.6501	0.5312	0.5491	0.5745	0.4756	0.4754	0.5473	0.5494	0.6179	0.501	0.554	0.5039	0.6975	0.4819	0.6152	0.5652	0.5996	0.5672	0.6139	0.6034	0.5355	0.4839	0.5051	0.5228	0.6747	0.5048	0.5347
8.83341	0.5515	0.6113	0.5901	0.6001	0.4982	0.5968	0.4251	0.4566	0.5073	0.4046	0.4694	0.4793	0.4019	0.4544	0.4092	0.4333	0.5241	0.5731	0.5153	0.5423	0.573	0.6125	0.6493	0.5268	0.546	0.5736	0.4738	0.4757	0.5369	0.5525	0.612	0.5029	0.549	0.5016	0.6986	0.4813	0.6133	0.5602	0.5999	0.5699	0.612	0.6049	0.5348	0.4881	0.505	0.5209	0.6785	0.5084	0.5372
8.91674	0.5504	0.6124	0.5888	0.5975	0.4997	0.5927	0.4267	0.454	0.5086	0.4072	0.4663	0.4782	0.402	0.4509	0.4083	0.43	0.5244	0.5777	0.5156	0.5406	0.5737	0.6145	0.6479	0.5247	0.5474	0.5763	0.472	0.4737	0.5467	0.5517	0.6086	0.5011	0.5507	0.5001	0.6943	0.4824	0.6103	0.5656	0.5993	0.5692	0.6087	0.6036	0.5364	0.4895	0.5049	0.5185	0.6832	0.5082	0.5404
9.00005	0.5487	0.6064	0.5839	0.5979	0.4955	0.5939	0.4246	0.45	0.506	0.4088	0.4648	0.4785	0.4028	0.448	0.4062	0.4298	0.5211	0.5773	0.5105	0.5381	0.57	0.6126	0.6457	0.5195	0.5432	0.5758	0.469	0.4736	0.5531	0.549	0.6028	0.4974	0.5523	0.5007	0.6908	0.4809	0.61	0.561	0.5965	0.5664	0.6058	0.602	0.5311	0.4894	0.5043	0.5156	0.6812	0.5074	0.5402
9.0834	0.5512	0.6082	0.5874	0.5987	0.4964	0.5951	0.4249	0.4503	0.508	0.4119	0.47	0.4803	0.4065	0.4479	0.4122	0.437	0.5255	0.5802	0.5122	0.5359	0.5688	0.6184	0.645	0.5212	0.5475	0.5822	0.4697	0.4757	0.5525	0.5501	0.6027	0.5021	0.5561	0.5021	0.6898	0.4807	0.6102	0.5633	0.6005	0.5681	0.6091	0.6039	0.5344	0.4968	0.5079	0.5158	0.683	0.5134	0.5454
9.16674	0.5491	0.6032	0.5831	0.5967	0.4961	0.5925	0.4239	0.4456	0.5047	0.4117	0.4706	0.4784	0.4065	0.4472	0.4121	0.4382	0.5221	0.5793	0.5076	0.5333	0.5665	0.6142	0.6405	0.5165	0.5435	0.5775	0.4677	0.4746	0.5481	0.5458	0.5968	0.4996	0.5572	0.5	0.6834	0.4783	0.6093	0.5587	0.5972	0.5691	0.608	0.6009	0.5321	0.4988	0.5034	0.5059	0.6837	0.5134	0.5409
9.25008	0.5516	0.6036	0.5874	0.5973	0.4989	0.5946	0.4253	0.4468	0.5069	0.4137	0.4758	0.4817	0.4112	0.4497	0.4125	0.4411	0.523	0.582	0.5079	0.5362	0.5659	0.6155	0.6405	0.517	0.5432	0.5756	0.4739	0.4768	0.5512	0.5473	0.5942	0.503	0.556	0.5025	0.6829	0.4779	0.6104	0.5626	0.5997	0.5714	0.6108	0.6092	0.5353	0.5012	0.503	0.5051	0.6824	0.5183	0.5408
9.33341	0.5532	0.6043	0.5874	0.6045	0.4994	0.6008	0.4301	0.4471	0.5064	0.4181	0.48	0.4828	0.4145	0.4502	0.4168	0.4456	0.5247	0.5829	0.5079	0.5377	0.5722	0.6218	0.642	0.5202	0.5487	0.5795	0.4746	0.478	0.5484	0.5455	0.5928	0.5052	0.5635	0.5033	0.6806	0.4823	0.6133	0.5639	0.6025	0.5779	0.6117	0.6139	0.5375	0.5063	0.5047	0.5026	0.6883	0.5239	0.5498
9.41675	0.5729	0.622	0.5841	0.6188	0.5149	0.605	0.4339	0.4505	0.514	0.4224	0.4896	0.5031	0.4355	0.4638	0.4201	0.4681	0.5354	0.6065	0.5105	0.5432	0.5842	0.6236	0.6428	0.5321	0.5615	0.5831	0.4854	0.4866	0.5351	0.5593	0.6014	0.5138	0.5706	0.5046	0.6824	0.494	0.6038	0.5733	0.6083	0.5848	0.6207	0.6265	0.558	0.5315	0.505	0.5099	0.6965	0.5319	0.5638
9.50008	0.5498	0.6046	0.5921	0.6049	0.4975	0.5945	0.4272	0.4467	0.5037	0.422	0.4764	0.4823	0.4182	0.4531	0.4154	0.45	0.5226	0.5808	0.4987	0.5329	0.5686	0.6157	0.6363	0.52	0.5466	0.5764	0.4726	0.4759	0.5329	0.5477	0.5962	0.5027	0.5575	0.5021	0.6656	0.4808	0.6122	0.5635	0.6036	0.5781	0.6102	0.6118	0.536	0.5101	0.5024	0.4983	0.678	0.5251	0.5561
9.58338	0.5494	0.6007	0.5928	0.6058	0.4965	0.5872	0.4231	0.4455	0.4997	0.4226	0.4777	0.481	0.4187	0.4512	0.4159	0.4498	0.5219	0.5793	0.4945	0.5325	0.568	0.6121	0.6347	0.5145	0.5454	0.5745	0.4722	0.4759	0.5534	0.5484	0.598	0.5026	0.5561	0.5012	0.659	0.4802	0.61	0.5647	0.6004	0.5758	0.6099	0.6105	0.5365	0.5126	0.5007	0.4947	0.6791	0.5266	0.5583
9.66675	0.548	0.5993	0.5949	0.6004	0.5008	0.5722	0.4204	0.4495	0.4977	0.4278	0.4757	0.4813	0.4172	0.4581	0.4113	0.4477	0.5238	0.5729	0.4929	0.5319	0.5656	0.6078	0.6282	0.516	0.544	0.5726	0.4737	0.4755	0.554	0.5461	0.5993	0.5011	0.5526	0.5051	0.6518	0.4771	0.6147	0.5623	0.604	0.574	0.6092	0.6104	0.5352	0.5104	0.4984	0.4961	0.6751	0.5259	0.5623
9.75008	0.5506	0.601	0.5974	0.5991	0.5035	0.573	0.4239	0.4553	0.4988	0.4356	0.4779	0.4827	0.4199	0.4599	0.4136	0.4475	0.5285	0.5739	0.4939	0.5349	0.5715	0.6037	0.6289	0.516	0.5441	0.5719	0.4775	0.4778	0.559	0.5482	0.6025	0.5053	0.5555	0.5075	0.6509	0.4796	0.6158	0.5635	0.6084	0.5736	0.6045	0.6182	0.5394	0.5155	0.5006	0.4985	0.6762	0.526	0.5721
9.83336	0.5572	0.6019	0.6051	0.5973	0.5068	0.569	0.4229	0.4568	0.5008	0.4408	0.4735	0.4845	0.421	0.4592	0.4139	0.447	0.5295	0.5721	0.4936	0.5358	0.5682	0.6032	0.6289	0.5172	0.5425	0.5743	0.4823	0.4735	0.5503	0.546	0.6039	0.5059	0.5587	0.5096	0.6509	0.4793	0.617	0.5663	0.6102	0.5749	0.6051	0.6169	0.5417	0.52	0.501	0.4985	0.6727	0.5277	0.5806
act in 1%	F340nm/F380nm
Time (min)
0	0.4097	0.3508	0.3339	0.4903	0.353	0.3694	0.4291	0.392	0.4507	0.4084	0.3519	0.361	0.3308	0.342	0.3844	0.3586	0.3743	0.3256	0.4152	0.3769	0.4309	0.4039	0.3516	0.3053	0.381	0.3731	0.3946	0.3898	0.3862	0	0	0.46	0.092	0.4269	0.2713	0	0	0.428	0.1918	0.2182	0.2275	0	0.3134	0.1718	0	0.5891	0.2971	0.3239	0.3125
0.08334	0.4115	0.3544	0.335	0.4901	0.3557	0.3625	0.4217	0.3946	0.4555	0.4096	0.3538	0.3638	0.3321	0.3446	0.3802	0.3655	0.407	0.328	0.4176	0.3785	0.4332	0.4065	0.3528	0.3054	0.382	0.3744	0.3972	0.391	0.3875	0.4126	0.4073	0.4695	0.4115	0.4553	0.3993	0.4191	0.4282	0.4427	0.3916	0.3851	0.3998	0.3863	0.3881	0.3845	0.4039	0.5066	0.3012	0.327	0.316
0.166747	0.4112	0.3557	0.3356	0.493	0.3563	0.3576	0.4187	0.3966	0.4575	0.4107	0.3544	0.3664	0.3353	0.3529	0.3778	0.3725	0.449	0.3317	0.4195	0.3812	0.437	0.4091	0.3532	0.306	0.3846	0.3758	0.4001	0.3944	0.3889	0.4158	0.4099	0.4893	0.4177	0.4621	0.4016	0.4247	0.4346	0.4485	0.3945	0.3878	0.4042	0.3895	0.3906	0.3869	0.4071	0.4879	0.3	0.332	0.3151
0.250197	0.409	0.3539	0.3368	0.4925	0.3565	0.355	0.4184	0.3958	0.4565	0.412	0.3551	0.3671	0.3388	0.3585	0.3788	0.3777	0.4671	0.3329	0.4323	0.3865	0.4364	0.4106	0.356	0.307	0.3881	0.3763	0.4038	0.403	0.3899	0.4147	0.4065	0.5298	0.4208	0.4712	0.3956	0.4271	0.4378	0.4571	0.3921	0.3834	0.4033	0.3882	0.3846	0.3837	0.4049	0.473	0.3003	0.3355	0.3164
0.333438	0.4107	0.3541	0.3368	0.4923	0.3591	0.3548	0.4263	0.395	0.4569	0.4116	0.3562	0.3661	0.3399	0.3705	0.375	0.3811	0.4675	0.3334	0.4279	0.391	0.4335	0.4132	0.3588	0.3064	0.3907	0.3775	0.4039	0.4148	0.3904	0.4176	0.4096	0.5402	0.4245	0.4937	0.3985	0.4321	0.4417	0.4797	0.3927	0.3832	0.4076	0.3908	0.3876	0.3865	0.4059	0.4815	0.3008	0.3431	0.3176
0.416782	0.4044	0.3506	0.3344	0.4855	0.3569	0.3484	0.46	0.3903	0.4533	0.4079	0.3544	0.3628	0.338	0.3888	0.3688	0.3845	0.4586	0.3326	0.4217	0.3938	0.4366	0.4088	0.3698	0.305	0.3941	0.3736	0.3979	0.4161	0.3875	0.4171	0.4058	0.5335	0.4312	0.4893	0.3947	0.4294	0.4483	0.4751	0.4026	0.3817	0.4048	0.3901	0.3837	0.3826	0.4162	0.4773	0.3012	0.3633	0.3209
0.500013	0.4087	0.3563	0.3375	0.4887	0.363	0.3548	0.4811	0.393	0.4584	0.4123	0.3618	0.3658	0.3456	0.4536	0.3732	0.3956	0.4496	0.3381	0.4295	0.4159	0.4387	0.4157	0.3675	0.308	0.4175	0.3784	0.4034	0.4165	0.3926	0.4189	0.4074	0.5437	0.4405	0.4914	0.3929	0.4349	0.4575	0.4777	0.4101	0.3842	0.4101	0.3926	0.3817	0.3844	0.4238	0.4883	0.3003	0.3928	0.3232
0.583437	0.4066	0.3573	0.3337	0.4894	0.3631	0.3665	0.4476	0.3921	0.4592	0.4114	0.3632	0.364	0.3441	0.4405	0.3697	0.4007	0.4505	0.3355	0.4342	0.41	0.4304	0.4171	0.3605	0.3077	0.4184	0.3777	0.4049	0.4143	0.3927	0.4176	0.4088	0.5392	0.4336	0.4776	0.3893	0.4327	0.451	0.4637	0.4123	0.3835	0.4079	0.3908	0.3781	0.3858	0.4259	0.4889	0.3004	0.3843	0.3234
0.666713	0.4068	0.3564	0.3337	0.4889	0.3613	0.368	0.4193	0.3908	0.457	0.4096	0.3656	0.3618	0.3428	0.4268	0.3658	0.4042	0.4554	0.3351	0.4319	0.4075	0.4251	0.4154	0.3582	0.308	0.416	0.3777	0.4042	0.4131	0.3926	0.4194	0.4138	0.5224	0.432	0.4645	0.3904	0.4331	0.4492	0.4502	0.4042	0.3878	0.4091	0.393	0.379	0.3916	0.4175	0.4856	0.3006	0.3662	0.3242
0.750005	0.4099	0.3569	0.3376	0.4911	0.3622	0.3764	0.4084	0.3919	0.4597	0.4127	0.3672	0.3639	0.345	0.4454	0.3701	0.4172	0.4502	0.337	0.4334	0.4166	0.4275	0.4162	0.3569	0.3097	0.4199	0.3792	0.4044	0.4116	0.3943	0.4218	0.4163	0.5006	0.4276	0.4512	0.3868	0.4316	0.4447	0.4369	0.3918	0.3856	0.4093	0.3951	0.3757	0.3934	0.4055	0.4729	0.2984	0.3464	0.3185
0.833405	0.4087	0.3536	0.335	0.4854	0.3608	0.3895	0.3947	0.3896	0.4575	0.4123	0.3705	0.3597	0.3411	0.4307	0.3688	0.4321	0.446	0.3334	0.4295	0.413	0.4234	0.4155	0.3548	0.3072	0.425	0.3764	0.4042	0.406	0.3915	0.4221	0.4151	0.4883	0.4235	0.4514	0.3848	0.4325	0.441	0.4367	0.3852	0.3863	0.4114	0.3959	0.3736	0.3927	0.3986	0.4626	0.3006	0.3367	0.3212
0.916745	0.413	0.3566	0.3382	0.4906	0.364	0.3987	0.3961	0.3928	0.4615	0.4181	0.369	0.3634	0.3438	0.4333	0.3754	0.4493	0.4702	0.34	0.4327	0.4189	0.4234	0.4182	0.3591	0.3096	0.426	0.3788	0.4067	0.409	0.3954	0.4233	0.4153	0.4815	0.4269	0.4537	0.386	0.433	0.4439	0.4383	0.3828	0.3857	0.4125	0.3963	0.3749	0.3927	0.3962	0.4564	0.2992	0.3308	0.3176
1.00004	0.4144	0.3543	0.3403	0.4897	0.3632	0.3963	0.3942	0.3918	0.4609	0.4129	0.3671	0.3631	0.3397	0.4233	0.373	0.4416	0.4672	0.34	0.4332	0.4167	0.4204	0.4179	0.3606	0.3077	0.4221	0.3799	0.4037	0.4119	0.3956	0.4229	0.4116	0.4737	0.4211	0.4518	0.3828	0.4296	0.4382	0.4361	0.3801	0.3832	0.4092	0.3961	0.3719	0.3889	0.3935	0.453	0.2995	0.3386	0.319
1.08337	0.4137	0.3543	0.3375	0.4931	0.364	0.3895	0.3913	0.3937	0.4659	0.415	0.3611	0.3611	0.3394	0.4261	0.3678	0.4296	0.4579	0.3417	0.4304	0.4167	0.4193	0.4148	0.3605	0.3091	0.4163	0.3768	0.4047	0.4077	0.3984	0.4226	0.4135	0.47	0.421	0.4667	0.3821	0.427	0.438	0.451	0.3789	0.3864	0.4072	0.3954	0.371	0.3906	0.3924	0.4489	0.2973	0.3443	0.3175
1.16668	0.4157	0.3549	0.3353	0.4946	0.3666	0.3895	0.3936	0.3992	0.469	0.4154	0.3598	0.3611	0.341	0.4283	0.3639	0.4142	0.453	0.3443	0.4324	0.4173	0.4225	0.4133	0.3673	0.3091	0.4162	0.3754	0.4056	0.4082	0.4038	0.4199	0.4139	0.4664	0.4219	0.4546	0.3815	0.426	0.4393	0.4383	0.381	0.3849	0.4063	0.3927	0.3707	0.3908	0.3945	0.4441	0.2983	0.3746	0.3205
1.25001	0.4145	0.3544	0.3343	0.494	0.3646	0.3815	0.3965	0.3985	0.469	0.4193	0.3557	0.3605	0.3396	0.4157	0.364	0.4023	0.4378	0.3455	0.429	0.4152	0.4209	0.4126	0.3823	0.3084	0.4149	0.3732	0.4053	0.4086	0.4056	0.4231	0.4207	0.4672	0.4261	0.4407	0.3836	0.4292	0.4437	0.4245	0.386	0.3886	0.4098	0.3956	0.3725	0.3976	0.3999	0.4497	0.2995	0.3812	0.3244
1.33341	0.4148	0.3574	0.3366	0.4972	0.3686	0.3836	0.4157	0.3998	0.4648	0.42	0.354	0.3626	0.3429	0.4137	0.3668	0.3969	0.4321	0.3505	0.4331	0.4144	0.4254	0.4178	0.377	0.3102	0.4157	0.3752	0.4071	0.4185	0.4101	0.4233	0.4209	0.4525	0.4225	0.4351	0.3831	0.4263	0.4402	0.4189	0.3849	0.3856	0.4084	0.3956	0.3722	0.3976	0.3991	0.4449	0.2973	0.3656	0.3204
1.41672	0.4188	0.3579	0.3366	0.4984	0.3692	0.3823	0.4351	0.4003	0.4606	0.4202	0.3544	0.3653	0.3426	0.4135	0.3685	0.3927	0.4272	0.3478	0.4354	0.4164	0.4268	0.4189	0.3735	0.3093	0.4204	0.3773	0.4042	0.4262	0.4091	0.4236	0.4179	0.4363	0.412	0.434	0.3793	0.4216	0.4296	0.4174	0.3849	0.3837	0.4046	0.3963	0.3685	0.3943	0.3987	0.4399	0.2967	0.3444	0.3195
1.50003	0.4109	0.3568	0.3323	0.4909	0.3653	0.3775	0.4915	0.3969	0.4554	0.4182	0.3514	0.3642	0.3391	0.3997	0.3616	0.3788	0.4098	0.3488	0.4308	0.4084	0.4316	0.416	0.3643	0.3085	0.4171	0.3745	0.4029	0.4216	0.4078	0.4263	0.4207	0.432	0.4129	0.4667	0.3798	0.4207	0.4307	0.4499	0.3832	0.3869	0.404	0.3988	0.3689	0.3976	0.3965	0.4356	0.2954	0.3362	0.3183
1.58338	0.4128	0.3568	0.3341	0.4855	0.3667	0.3776	0.5139	0.3983	0.4558	0.4243	0.3555	0.366	0.3397	0.3959	0.3637	0.379	0.4006	0.3493	0.4314	0.4089	0.4333	0.4216	0.3621	0.3095	0.4237	0.3759	0.4044	0.424	0.4102	0.4305	0.4236	0.429	0.4113	0.4792	0.3797	0.4218	0.429	0.4625	0.3873	0.3866	0.4058	0.4028	0.3688	0.4001	0.4012	0.4369	0.2944	0.3319	0.3202
1.66671	0.4117	0.357	0.3337	0.4884	0.3664	0.3727	0.515	0.3994	0.4554	0.4224	0.3603	0.3687	0.3418	0.39	0.3634	0.3748	0.395	0.3519	0.4332	0.4084	0.4336	0.4214	0.3612	0.3094	0.422	0.3757	0.4039	0.4225	0.4122	0.4294	0.4207	0.4243	0.4094	0.4537	0.3774	0.4186	0.4271	0.4368	0.3891	0.3854	0.4021	0.4024	0.3667	0.3967	0.4029	0.4319	0.296	0.3292	0.3226
1.75005	0.4142	0.3541	0.3333	0.4858	0.3666	0.3725	0.511	0.3996	0.455	0.4246	0.364	0.3696	0.3438	0.3795	0.3654	0.3725	0.3932	0.3468	0.4336	0.4058	0.433	0.4165	0.3623	0.3084	0.4166	0.374	0.401	0.4211	0.4131	0.428	0.4221	0.4217	0.4082	0.4347	0.3793	0.417	0.426	0.4177	0.4062	0.385	0.4006	0.4008	0.3686	0.3981	0.4208	0.4256	0.2978	0.3267	0.3222
1.83348	0.4124	0.3511	0.3328	0.4815	0.3652	0.3719	0.504	0.3987	0.4529	0.4356	0.3607	0.3688	0.3418	0.3726	0.3706	0.3679	0.3809	0.3452	0.4326	0.403	0.4314	0.4143	0.3548	0.3084	0.4139	0.371	0.4018	0.4142	0.4147	0.4293	0.4218	0.4238	0.4083	0.4263	0.3787	0.4164	0.4261	0.409	0.4213	0.3873	0.4	0.4019	0.3681	0.3975	0.4359	0.423	0.2962	0.3256	0.3181
1.91676	0.4155	0.349	0.3338	0.4799	0.3654	0.369	0.4948	0.3996	0.4508	0.4334	0.3598	0.3664	0.3413	0.3686	0.3695	0.3675	0.3756	0.3432	0.4318	0.4016	0.4299	0.4126	0.3528	0.3077	0.4166	0.3696	0.4011	0.414	0.419	0.4269	0.4205	0.4263	0.4088	0.4175	0.3781	0.4171	0.4267	0.3999	0.4482	0.3877	0.4003	0.3992	0.3675	0.3962	0.4635	0.419	0.3007	0.3226	0.3177
2.00007	0.4172	0.3486	0.3376	0.4815	0.3666	0.3674	0.481	0.403	0.4532	0.4271	0.3575	0.3622	0.3426	0.364	0.3686	0.369	0.3813	0.3378	0.4322	0.4018	0.428	0.4131	0.356	0.3074	0.4169	0.3702	0.4005	0.4207	0.42	0.4257	0.4162	0.4293	0.4088	0.4094	0.3757	0.4154	0.4261	0.3918	0.4285	0.3833	0.398	0.3978	0.3651	0.3919	0.4433	0.4161	0.2987	0.3194	0.3172
2.08338	0.4129	0.3459	0.3324	0.4798	0.367	0.3666	0.4786	0.4023	0.4549	0.4244	0.3545	0.3586	0.3424	0.3725	0.3662	0.3708	0.3879	0.3451	0.4301	0.4	0.4277	0.4111	0.3529	0.3097	0.4135	0.3674	0.4037	0.4184	0.4197	0.4251	0.4158	0.4292	0.4082	0.4065	0.3755	0.4156	0.4258	0.3893	0.4251	0.3823	0.3983	0.3973	0.365	0.3912	0.4399	0.4151	0.2969	0.3161	0.3184
2.16675	0.416	0.3464	0.3348	0.4827	0.368	0.3686	0.4675	0.4036	0.4562	0.4208	0.3544	0.3567	0.3414	0.3656	0.3636	0.3751	0.391	0.3456	0.4332	0.3979	0.4255	0.4131	0.357	0.3105	0.4104	0.3688	0.4041	0.424	0.4186	0.4236	0.4139	0.4253	0.4018	0.4033	0.3747	0.4141	0.4194	0.3857	0.428	0.3803	0.3972	0.3958	0.3641	0.3894	0.4429	0.4092	0.2967	0.319	0.3164
2.25005	0.415	0.345	0.3332	0.48	0.3694	0.3704	0.4678	0.4072	0.4594	0.4246	0.3549	0.3562	0.345	0.3652	0.3631	0.3795	0.4018	0.3464	0.4333	0.4023	0.4285	0.4115	0.3593	0.3101	0.4101	0.3686	0.4014	0.4257	0.4149	0.429	0.42	0.4309	0.4042	0.4041	0.376	0.4198	0.4216	0.3869	0.416	0.3834	0.4027	0.4013	0.3656	0.3947	0.4307	0.4091	0.2981	0.3206	0.3143
2.33339	0.411	0.3429	0.3304	0.4727	0.3649	0.3718	0.5257	0.4124	0.4661	0.4246	0.3551	0.3547	0.3477	0.3711	0.3618	0.384	0.4074	0.3495	0.4311	0.4034	0.4443	0.4103	0.3576	0.3085	0.408	0.3678	0.4007	0.4225	0.4133	0.4315	0.4216	0.4323	0.4077	0.4019	0.3764	0.4198	0.4253	0.3847	0.4004	0.3823	0.4025	0.4034	0.3659	0.3964	0.4143	0.41	0.2982	0.3211	0.3157
2.41668	0.4127	0.3432	0.3336	0.4746	0.3655	0.3784	0.5489	0.4138	0.4632	0.4308	0.3548	0.3551	0.3464	0.3782	0.3578	0.4018	0.4106	0.3453	0.432	0.403	0.447	0.4117	0.3595	0.3089	0.4012	0.3683	0.4022	0.4245	0.4144	0.4323	0.4212	0.4341	0.4078	0.3985	0.3735	0.4182	0.4256	0.381	0.3928	0.3804	0.4007	0.4032	0.3631	0.3957	0.4067	0.4036	0.3015	0.321	0.3264
2.50004	0.4089	0.3416	0.3307	0.4746	0.3629	0.373	0.5238	0.4136	0.4638	0.4301	0.3531	0.3525	0.3474	0.3883	0.3539	0.4327	0.432	0.3459	0.4294	0.4015	0.4402	0.4085	0.3611	0.3088	0.393	0.3682	0.4002	0.4231	0.4116	0.4332	0.4223	0.4366	0.4091	0.3989	0.3738	0.4207	0.4268	0.381	0.3859	0.3814	0.4034	0.4043	0.3632	0.3969	0.3997	0.4013	0.2967	0.3199	0.3176
2.58335	0.4132	0.3415	0.33	0.4753	0.365	0.3745	0.4913	0.4148	0.4617	0.4309	0.3527	0.3535	0.3596	0.3836	0.3543	0.4576	0.4288	0.343	0.4328	0.4093	0.4371	0.4108	0.3642	0.3102	0.3916	0.3701	0.3997	0.4241	0.4079	0.4357	0.425	0.4338	0.4104	0.4036	0.3749	0.4222	0.4286	0.3856	0.3845	0.3827	0.4055	0.4079	0.3642	0.4	0.3984	0.4037	0.2968	0.3194	0.3152
2.66673	0.4127	0.3388	0.3257	0.47	0.3622	0.3776	0.4626	0.4117	0.4594	0.4234	0.3491	0.3516	0.3721	0.3796	0.3509	0.4244	0.4021	0.3364	0.4266	0.4143	0.429	0.4082	0.3598	0.3071	0.3865	0.368	0.3962	0.4189	0.4045	0.4292	0.4228	0.4291	0.4103	0.4003	0.372	0.4196	0.4287	0.3827	0.3796	0.3794	0.4034	0.4011	0.3614	0.3972	0.3932	0.4021	0.2949	0.3221	0.3152
2.7501	0.4103	0.3438	0.3234	0.4723	0.3637	0.3803	0.4582	0.4112	0.4615	0.4355	0.3481	0.3513	0.4034	0.3862	0.3523	0.4156	0.3954	0.34	0.4293	0.4333	0.4277	0.4084	0.3585	0.3077	0.3863	0.3678	0.3993	0.4149	0.4119	0.4293	0.4241	0.4298	0.4094	0.4035	0.3745	0.4259	0.4275	0.3854	0.3823	0.3822	0.4102	0.4013	0.3638	0.3984	0.3957	0.4032	0.2951	0.3222	0.3184
2.83341	0.4072	0.3465	0.3225	0.4704	0.3638	0.3841	0.4672	0.4107	0.462	0.4284	0.3482	0.3502	0.4488	0.3846	0.3506	0.4052	0.3907	0.3377	0.4293	0.4516	0.4305	0.4069	0.3576	0.3079	0.3881	0.3678	0.4021	0.4167	0.4144	0.433	0.4255	0.4306	0.409	0.4031	0.375	0.4249	0.4271	0.3851	0.382	0.3814	0.4091	0.4048	0.3643	0.3998	0.3952	0.4049	0.2908	0.3229	0.3156
2.91671	0.4136	0.3471	0.3258	0.4726	0.3649	0.382	0.4634	0.4131	0.4662	0.4316	0.349	0.351	0.4441	0.3786	0.3526	0.3994	0.3823	0.3392	0.4313	0.4463	0.4335	0.4065	0.3603	0.3089	0.3896	0.3674	0.404	0.416	0.4163	0.4338	0.4256	0.4418	0.4087	0.403	0.3735	0.4263	0.4269	0.3851	0.3815	0.3824	0.4102	0.4051	0.363	0.3999	0.3948	0.4009	0.2925	0.3259	0.3172
3.00005	0.4091	0.3452	0.3253	0.4631	0.3628	0.3793	0.4474	0.4111	0.4637	0.439	0.3497	0.3496	0.4116	0.3715	0.3524	0.3968	0.3836	0.3364	0.4275	0.431	0.4283	0.4044	0.3628	0.3086	0.3899	0.365	0.4024	0.4152	0.4122	0.4362	0.4264	0.4582	0.4104	0.4033	0.3752	0.4272	0.4287	0.3851	0.3831	0.3807	0.4095	0.4077	0.3648	0.4007	0.3963	0.401	0.2904	0.3244	0.3168
3.08335	0.4082	0.3496	0.3251	0.4661	0.3604	0.3858	0.4395	0.4121	0.4647	0.4358	0.3508	0.3479	0.3921	0.369	0.3525	0.3833	0.3806	0.3333	0.426	0.4213	0.4282	0.4033	0.3755	0.311	0.3895	0.3642	0.4056	0.4164	0.4092	0.4346	0.4222	0.4833	0.4141	0.4062	0.3736	0.4326	0.4323	0.3878	0.3821	0.3822	0.4135	0.4064	0.3629	0.3966	0.3951	0.399	0.2903	0.3293	0.316
3.16668	0.4094	0.3516	0.3272	0.471	0.3621	0.3902	0.4371	0.4113	0.4696	0.4304	0.3518	0.3491	0.3842	0.3621	0.3531	0.3778	0.3763	0.3314	0.428	0.4158	0.432	0.4024	0.3943	0.3144	0.3919	0.3648	0.4034	0.4153	0.4067	0.433	0.4185	0.4706	0.4109	0.4066	0.3732	0.4307	0.4293	0.3883	0.3849	0.3809	0.4127	0.4045	0.3627	0.393	0.3982	0.3966	0.2907	0.3299	0.3176
3.25007	0.4077	0.355	0.3247	0.4735	0.3601	0.3867	0.4308	0.4101	0.4675	0.4297	0.3492	0.3452	0.3953	0.3616	0.3526	0.3738	0.376	0.3324	0.4265	0.418	0.4274	0.3978	0.3907	0.3129	0.3855	0.3636	0.4007	0.4129	0.4015	0.4322	0.4156	0.4543	0.4118	0.4079	0.3741	0.4291	0.4299	0.3893	0.3856	0.3803	0.4125	0.4031	0.3638	0.3898	0.3993	0.3929	0.2914	0.3268	0.3217
3.33343	0.4079	0.3555	0.328	0.4708	0.3614	0.3868	0.433	0.4091	0.4659	0.4385	0.3512	0.3476	0.3886	0.3619	0.3599	0.3744	0.3766	0.3361	0.4304	0.4183	0.4261	0.4007	0.3853	0.312	0.3823	0.3681	0.4003	0.4167	0.401	0.4322	0.4127	0.4438	0.4094	0.4117	0.3731	0.4274	0.4277	0.393	0.3855	0.3805	0.411	0.4032	0.3627	0.3871	0.3991	0.3908	0.2933	0.3274	0.3233
3.41675	0.4138	0.3546	0.3298	0.4674	0.3636	0.3871	0.4457	0.411	0.482	0.435	0.3554	0.3483	0.3746	0.3603	0.3621	0.376	0.3832	0.3346	0.4346	0.4121	0.4295	0.4029	0.3851	0.3128	0.3827	0.3705	0.4039	0.4208	0.402	0.4331	0.413	0.4362	0.4112	0.4155	0.3736	0.4272	0.4298	0.3964	0.3917	0.3819	0.4114	0.4036	0.3632	0.3872	0.4057	0.3901	0.2936	0.3253	0.3184
3.50007	0.4079	0.3477	0.3276	0.4654	0.3595	0.3863	0.4698	0.4049	0.4798	0.429	0.3523	0.3449	0.3638	0.3547	0.3559	0.3731	0.3929	0.3326	0.4316	0.4056	0.4311	0.3998	0.3779	0.3076	0.3766	0.3735	0.4044	0.415	0.3994	0.4347	0.4102	0.428	0.4109	0.4155	0.3727	0.4297	0.4301	0.3952	0.3873	0.3838	0.4157	0.4072	0.3626	0.3855	0.4011	0.3909	0.2983	0.3281	0.3189
3.5834	0.4077	0.3428	0.3296	0.4722	0.3609	0.3846	0.4875	0.4102	0.4882	0.4308	0.3523	0.3475	0.3601	0.3565	0.3583	0.3705	0.4038	0.335	0.4349	0.4026	0.4403	0.4044	0.3752	0.3088	0.3809	0.3836	0.4087	0.4163	0.4045	0.4368	0.4101	0.428	0.4195	0.4156	0.3749	0.4341	0.4389	0.395	0.3883	0.3843	0.4206	0.4085	0.3646	0.3852	0.4024	0.3938	0.3036	0.325	0.3185
3.66676	0.405	0.3375	0.3285	0.4772	0.3619	0.3765	0.4878	0.4087	0.4909	0.4296	0.3502	0.3456	0.3601	0.3547	0.3559	0.3705	0.4151	0.3365	0.435	0.4035	0.4395	0.4028	0.3672	0.3077	0.3816	0.3876	0.4117	0.4178	0.4071	0.4352	0.4103	0.4273	0.4241	0.4133	0.3756	0.4432	0.443	0.3926	0.389	0.3845	0.4308	0.4075	0.3655	0.386	0.4025	0.3925	0.3052	0.3271	0.3193
3.75009	0.4041	0.3357	0.328	0.4717	0.3627	0.3739	0.4717	0.4059	0.4853	0.4271	0.3479	0.345	0.3613	0.3558	0.3596	0.369	0.4172	0.3384	0.4357	0.4047	0.436	0.4031	0.3625	0.308	0.3835	0.387	0.4119	0.418	0.4098	0.4415	0.4102	0.4298	0.4202	0.4164	0.377	0.4423	0.4404	0.3945	0.3932	0.3855	0.4297	0.4143	0.3671	0.3863	0.4067	0.3969	0.3091	0.3264	0.3178
3.83335	0.4094	0.3355	0.3307	0.4738	0.3664	0.3786	0.4611	0.403	0.4762	0.4294	0.3482	0.3463	0.3619	0.3546	0.3659	0.3708	0.4244	0.3405	0.4391	0.4057	0.436	0.4052	0.361	0.3086	0.3864	0.3895	0.407	0.4197	0.4058	0.439	0.4083	0.4271	0.417	0.4168	0.3756	0.4388	0.4374	0.3947	0.3935	0.386	0.4263	0.4118	0.366	0.3846	0.4067	0.3921	0.3046	0.3291	0.3213
3.91669	0.4052	0.3343	0.3285	0.4663	0.3647	0.3772	0.4448	0.4011	0.4657	0.4268	0.3462	0.3478	0.3685	0.3574	0.3665	0.369	0.4343	0.3425	0.4335	0.4069	0.4275	0.4038	0.3553	0.3075	0.3881	0.3835	0.4023	0.4163	0.4043	0.4418	0.4057	0.4293	0.4166	0.4129	0.3749	0.4387	0.4369	0.3904	0.3948	0.3854	0.4256	0.4145	0.3654	0.382	0.4077	0.389	0.2981	0.3278	0.3197
4.00004	0.4016	0.3336	0.3269	0.4687	0.3667	0.3816	0.4256	0.3998	0.457	0.4272	0.3458	0.3493	0.378	0.3609	0.3693	0.3672	0.4353	0.3398	0.4327	0.4113	0.4222	0.4031	0.3548	0.306	0.386	0.3872	0.3982	0.4151	0.4007	0.445	0.4069	0.4323	0.4175	0.4145	0.3765	0.4408	0.4376	0.3918	0.3957	0.3869	0.4273	0.4179	0.3672	0.3837	0.4088	0.3906	0.2952	0.3241	0.3178
4.08343	0.3982	0.3349	0.3258	0.4684	0.38	0.3848	0.4186	0.3987	0.4563	0.4236	0.3487	0.3502	0.3907	0.3658	0.3678	0.3662	0.421	0.3467	0.4337	0.4209	0.4224	0.4032	0.3547	0.3061	0.3788	0.3818	0.3982	0.4157	0.4022	0.4412	0.4081	0.4314	0.4139	0.4184	0.3762	0.4363	0.4338	0.3962	0.3972	0.3864	0.4226	0.4143	0.3673	0.3856	0.4095	0.3889	0.2931	0.3212	0.3149
4.16672	0.3979	0.335	0.3275	0.467	0.3649	0.3843	0.4141	0.3961	0.459	0.4236	0.3495	0.3511	0.4453	0.3699	0.3647	0.3667	0.4242	0.3432	0.4391	0.4537	0.4222	0.4015	0.3554	0.3052	0.39	0.3899	0.3979	0.4137	0.4016	0.4427	0.4098	0.4336	0.4123	0.4224	0.3805	0.432	0.4317	0.4012	0.3958	0.3851	0.4164	0.4139	0.371	0.3856	0.4091	0.3871	0.2981	0.3206	0.3131
4.2501	0.3956	0.3325	0.329	0.4599	0.3644	0.3891	0.4177	0.3994	0.4661	0.4259	0.3492	0.3567	0.4674	0.3759	0.3694	0.3701	0.431	0.3487	0.442	0.4618	0.4309	0.4038	0.3658	0.3084	0.3925	0.3907	0.3997	0.4185	0.403	0.4445	0.4093	0.4344	0.4105	0.4242	0.3822	0.43	0.43	0.4027	0.3954	0.386	0.414	0.4163	0.3725	0.3849	0.4091	0.3919	0.2959	0.3239	0.3138
4.33339	0.395	0.3301	0.3304	0.4601	0.3636	0.3948	0.4291	0.4015	0.4701	0.43	0.349	0.3523	0.4289	0.3838	0.3685	0.366	0.4149	0.3474	0.4363	0.4453	0.4426	0.4028	0.414	0.3195	0.4082	0.3871	0.4097	0.4255	0.4135	0.4453	0.4091	0.4383	0.4108	0.4249	0.3821	0.4277	0.4303	0.4035	0.3925	0.3868	0.4111	0.4168	0.3723	0.3849	0.4065	0.3951	0.2927	0.3241	0.3151
4.41675	0.3985	0.3318	0.3463	0.4617	0.3754	0.4087	0.7599	0.4163	0.4874	0.457	0.3624	0.3558	0.4815	0.4156	0.4067	0.3893	0.4769	0.3592	0.4459	0.4838	0.5493	0.4187	0.415	0.3207	0.4441	0.3992	0.4462	0.4844	0.477	0.4444	0.408	0.4422	0.4069	0.4286	0.3831	0.4295	0.4266	0.4075	0.3939	0.3847	0.4123	0.4156	0.3734	0.3837	0.4079	0.3987	0.2934	0.3248	0.3147
4.50007	0.4049	0.3316	0.3453	0.5431	0.4004	0.4264	0.8059	0.4318	0.5062	0.6536	0.4229	0.3568	0.5203	0.4519	0.6226	0.5312	0.5382	0.3754	0.4639	0.5092	0.5785	0.4321	0.4772	0.3267	0.5277	0.4155	0.5424	0.55	0.5243	0.4471	0.4127	0.4617	0.4183	0.456	0.3908	0.4501	0.4379	0.4352	0.3975	0.3921	0.4336	0.4184	0.3811	0.3885	0.4114	0.4103	0.2967	0.3363	0.3247
4.58337	0.4957	0.3386	0.3518	0.822	0.4876	0.4412	0.8688	0.5202	0.6384	0.6933	0.6014	0.4127	0.5658	0.5022	0.6353	0.586	0.5909	0.3921	0.4732	0.5441	0.6556	0.4771	0.4854	0.342	0.5711	0.4536	0.7153	0.7159	0.7018	0.4466	0.419	0.5694	0.4704	0.4885	0.3998	0.5997	0.4872	0.4678	0.4401	0.3991	0.5896	0.4185	0.3897	0.3951	0.4554	0.4201	0.3267	0.3936	0.4158
4.66676	1.3191	0.3504	0.3783	1.2016	0.6777	0.4688	0.9278	0.8001	1.0284	0.7521	0.6318	0.6065	0.618	0.5315	0.6385	0.5957	0.6049	0.4143	0.4804	0.5812	0.929	0.5593	0.5	0.4993	0.587	0.4845	0.7923	0.8388	0.8618	0.4491	0.4326	0.6009	0.5086	0.4999	0.4343	0.5915	0.5249	0.4794	0.4873	0.469	0.5779	0.4209	0.4248	0.4089	0.4997	0.4346	0.3848	0.4821	0.4472
4.75009	1.2796	0.3791	0.4588	1.1847	0.6069	0.4775	0.9022	0.7822	0.9927	0.7898	0.6541	0.5779	0.65	0.5561	0.6178	0.6066	0.5978	0.4544	0.5013	0.6209	0.911	0.574	0.552	0.4622	0.597	0.4915	0.8209	0.8656	0.893	0.4489	0.4778	0.6096	0.5335	0.5337	0.4512	0.6079	0.5489	0.5132	0.5009	0.5286	0.5945	0.4208	0.4419	0.455	0.5103	0.4447	0.3781	0.4783	0.4423
4.83338	1.2092	0.4895	0.6697	1.1428	0.6426	0.4753	0.8886	0.8236	0.989	0.8026	0.6667	0.6375	0.6984	0.6078	0.5862	0.5944	0.5781	0.5007	0.5783	0.6836	0.9263	0.6368	0.5745	0.4969	0.6057	0.5038	0.8293	0.8522	0.9137	0.4527	0.5713	0.6218	0.5361	0.5519	0.4594	0.6087	0.5518	0.5319	0.5011	0.5338	0.5949	0.4243	0.4501	0.5507	0.5109	0.4526	0.4067	0.5149	0.4505
4.91674	1.1507	0.5824	0.6399	1.1079	0.7024	0.4873	0.8839	0.8196	1.005	0.8035	0.6643	0.6541	0.7076	0.5994	0.5603	0.5951	0.5578	0.4812	0.6143	0.6971	0.9048	0.7845	0.5698	0.496	0.6276	0.5241	0.8043	0.8412	0.893	0.4592	0.5599	0.63	0.5423	0.5625	0.4689	0.6018	0.5578	0.5426	0.4995	0.5629	0.5864	0.4301	0.4599	0.5391	0.508	0.4548	0.4135	0.5325	0.4618
5.00007	1.0669	0.5254	0.6369	1.0516	0.7131	0.5827	0.8716	0.8035	1.0021	0.788	0.6508	0.6596	0.7125	0.5897	0.524	0.5787	0.5315	0.5126	0.6389	0.7039	0.8702	0.7415	0.5648	0.4969	0.6299	0.5163	0.7741	0.8217	0.8531	0.4738	0.5486	0.6228	0.5353	0.5685	0.4802	0.5868	0.551	0.5481	0.4911	0.5603	0.5699	0.4458	0.4714	0.528	0.5005	0.4588	0.426	0.5349	0.4674
5.08338	0.9981	0.5414	0.619	1.0213	0.7125	0.5425	0.8634	0.7854	0.9928	0.7591	0.6309	0.644	0.7134	0.575	0.4938	0.5575	0.5077	0.523	0.6272	0.7013	0.8347	0.7821	0.5522	0.4928	0.6422	0.5215	0.7388	0.7999	0.8085	0.5061	0.5312	0.6063	0.5244	0.5688	0.4838	0.5634	0.5408	0.5487	0.4761	0.5481	0.5457	0.4776	0.4756	0.5096	0.4859	0.4573	0.4275	0.5348	0.468
5.16673	0.9433	0.593	0.5954	0.9745	0.7071	0.556	0.8611	0.7645	0.9968	0.7335	0.6149	0.6192	0.7082	0.5523	0.4763	0.5382	0.488	0.5364	0.6383	0.6988	0.797	0.7451	0.5394	0.4884	0.6084	0.5161	0.7068	0.7863	0.7645	0.5594	0.5268	0.5935	0.5166	0.571	0.4941	0.545	0.534	0.5502	0.4651	0.543	0.5261	0.5322	0.4859	0.5053	0.4752	0.4606	0.4302	0.5377	0.4697
5.25011	0.8889	0.5798	0.5706	0.944	0.6907	0.5787	0.856	0.7431	1.0384	0.7059	0.5999	0.5875	0.7021	0.5337	0.4653	0.518	0.4719	0.527	0.6401	0.694	0.7652	0.7241	0.5219	0.4772	0.5956	0.5129	0.6772	0.7765	0.7258	0.5802	0.5251	0.5747	0.5044	0.564	0.495	0.5189	0.522	0.5436	0.4534	0.5284	0.4994	0.553	0.4868	0.5027	0.4644	0.4558	0.4252	0.5357	0.4578
5.33333	0.8684	0.592	0.5497	0.9425	0.6716	0.5786	0.8644	0.7303	1.045	0.6876	0.5941	0.5622	0.7005	0.5181	0.4655	0.5082	0.4649	0.513	0.6373	0.696	0.7489	0.709	0.5102	0.4706	0.5912	0.5179	0.6558	0.7825	0.7017	0.5926	0.5268	0.5567	0.4946	0.5649	0.495	0.5011	0.5129	0.5439	0.4457	0.5199	0.4809	0.5659	0.4868	0.5045	0.457	0.4565	0.4208	0.5335	0.4505
5.41673	0.838	0.599	0.5241	0.9167	0.6406	0.5637	0.8611	0.7137	1.0474	0.6631	0.5804	0.5343	0.6913	0.5015	0.4549	0.4901	0.4546	0.5041	0.6285	0.6839	0.7255	0.6773	0.4929	0.4552	0.5651	0.5161	0.6328	0.7702	0.6789	0.5945	0.5215	0.5368	0.4812	0.5603	0.4926	0.4807	0.4996	0.5388	0.4361	0.4979	0.4603	0.5683	0.4847	0.4988	0.4484	0.453	0.4127	0.5296	0.4394
5.50007	0.8313	0.5875	0.5034	0.9176	0.6127	0.5664	0.859	0.7009	1.0571	0.6363	0.5704	0.5124	0.6825	0.4834	0.4506	0.4769	0.4431	0.4871	0.6058	0.675	0.7092	0.6465	0.4861	0.443	0.5523	0.5124	0.6166	0.7703	0.6576	0.5833	0.5152	0.5199	0.4675	0.5519	0.4866	0.4656	0.4865	0.5299	0.428	0.4754	0.4452	0.5577	0.479	0.492	0.4411	0.4491	0.4101	0.5346	0.4368
5.58337	0.83	0.5944	0.4861	0.9201	0.5884	0.5655	0.8583	0.6899	1.0793	0.6188	0.5652	0.4976	0.6735	0.4736	0.4497	0.4682	0.4377	0.4725	0.5841	0.6674	0.7014	0.6284	0.4843	0.4379	0.5468	0.5143	0.6117	0.7731	0.6496	0.6007	0.514	0.5088	0.4605	0.5503	0.4846	0.456	0.4801	0.5284	0.4239	0.4603	0.4353	0.5745	0.4769	0.4907	0.4373	0.448	0.4047	0.5321	0.4313
5.66672	0.8348	0.5667	0.4797	0.9006	0.5627	0.5549	0.8602	0.675	1.0753	0.5962	0.5611	0.4895	0.6551	0.4533	0.4567	0.458	0.4289	0.4473	0.5579	0.6551	0.6935	0.6077	0.4868	0.4285	0.5287	0.5125	0.5983	0.7716	0.6351	0.6102	0.5098	0.5023	0.4556	0.5454	0.4794	0.4506	0.475	0.5231	0.4209	0.4453	0.4299	0.5846	0.4717	0.4862	0.4353	0.4457	0.3993	0.528	0.4232
5.75004	0.8146	0.5648	0.4651	0.8978	0.5439	0.5564	0.8525	0.6621	1.0865	0.5811	0.5553	0.48	0.648	0.4505	0.4551	0.4491	0.4258	0.4334	0.5277	0.6463	0.6869	0.5946	0.4825	0.422	0.5256	0.5141	0.6019	0.7683	0.6339	0.6158	0.5117	0.4938	0.4527	0.541	0.4753	0.4481	0.472	0.5188	0.4165	0.4329	0.4278	0.5905	0.4677	0.4879	0.4315	0.4431	0.3971	0.5294	0.4184
5.83332	0.8097	0.5511	0.4613	0.902	0.5277	0.5541	0.855	0.6502	1.0923	0.5723	0.5554	0.478	0.642	0.4481	0.4599	0.4456	0.4267	0.4232	0.5068	0.6403	0.6862	0.588	0.4861	0.421	0.5255	0.5192	0.6044	0.7694	0.6376	0.6131	0.5069	0.4845	0.4442	0.5301	0.4637	0.4403	0.464	0.5074	0.411	0.4193	0.4201	0.5885	0.4561	0.4833	0.4263	0.4368	0.3917	0.5284	0.4154
5.91672	0.8042	0.5466	0.4574	0.9067	0.5105	0.5556	0.8524	0.6415	1.0946	0.5691	0.5546	0.4742	0.6411	0.446	0.4633	0.4412	0.4261	0.4141	0.4893	0.6363	0.6851	0.5857	0.4855	0.4199	0.528	0.5251	0.6109	0.7688	0.6413	0.6134	0.5095	0.4808	0.4432	0.5262	0.4582	0.4391	0.4628	0.5033	0.4103	0.4158	0.4192	0.5888	0.4504	0.4855	0.4262	0.4355	0.3887	0.5314	0.4133
6.00013	0.8163	0.5262	0.4619	0.9174	0.4922	0.5512	0.8601	0.6338	1.0902	0.5574	0.5557	0.4761	0.6341	0.4367	0.474	0.4383	0.4238	0.4034	0.4774	0.6337	0.6888	0.5878	0.4897	0.4158	0.5289	0.5322	0.6081	0.776	0.6375	0.6136	0.5136	0.4797	0.4449	0.5232	0.4518	0.4402	0.4645	0.5006	0.4127	0.4144	0.4201	0.5895	0.4441	0.4901	0.429	0.4337	0.3837	0.5307	0.4122
6.08342	0.8163	0.5326	0.4642	0.918	0.4791	0.5534	0.8679	0.6283	1.0923	0.5548	0.5539	0.4728	0.634	0.4389	0.4716	0.436	0.4272	0.4043	0.4701	0.6327	0.6957	0.5882	0.4921	0.4153	0.526	0.5369	0.6163	0.7811	0.6444	0.6135	0.5143	0.4788	0.4398	0.5184	0.4431	0.4373	0.4595	0.4955	0.4144	0.4123	0.4174	0.5888	0.4354	0.4908	0.4311	0.4303	0.3762	0.5324	0.4095
6.16673	0.8097	0.539	0.4662	0.9166	0.4683	0.55	0.88	0.6239	1.0856	0.5494	0.5533	0.4711	0.6367	0.436	0.4661	0.434	0.4245	0.4003	0.4628	0.6324	0.7009	0.5913	0.4975	0.4168	0.5274	0.5425	0.6187	0.7892	0.6447	0.6133	0.5211	0.4823	0.4409	0.5164	0.4383	0.4403	0.4607	0.4934	0.4223	0.4168	0.4206	0.5886	0.4302	0.4978	0.4393	0.4313	0.3707	0.5312	0.4118
6.25008	0.8219	0.5423	0.4754	0.9341	0.4661	0.5525	0.8894	0.6265	1.0895	0.551	0.5585	0.4737	0.6311	0.4354	0.4693	0.4354	0.4266	0.397	0.4601	0.6343	0.7112	0.5993	0.5098	0.4206	0.5362	0.5509	0.6245	0.7972	0.6519	0.6112	0.5215	0.4762	0.4375	0.5114	0.4283	0.4374	0.457	0.4878	0.4208	0.422	0.4181	0.589	0.4207	0.499	0.4374	0.4291	0.3661	0.5299	0.4119
6.33332	0.8161	0.5762	0.478	0.9299	0.4603	0.5537	0.8887	0.6234	1.0944	0.5523	0.5593	0.4742	0.6377	0.4429	0.4689	0.4331	0.4259	0.4021	0.4533	0.6351	0.7159	0.6012	0.514	0.4238	0.5385	0.5593	0.6334	0.7961	0.6633	0.6062	0.5253	0.4844	0.4356	0.505	0.4198	0.4352	0.4553	0.4813	0.4248	0.4213	0.4152	0.5821	0.4117	0.5027	0.442	0.4266	0.3621	0.5329	0.4131
6.41678	0.8287	0.6002	0.4895	0.9472	0.4592	0.5586	0.8953	0.6243	1.0958	0.5573	0.5592	0.4759	0.6339	0.445	0.4722	0.4343	0.4279	0.404	0.4532	0.6372	0.723	0.6066	0.5276	0.4261	0.5417	0.5697	0.6333	0.8032	0.6714	0.6	0.5263	0.4904	0.4338	0.5005	0.411	0.4341	0.4534	0.4771	0.4225	0.4186	0.4135	0.5751	0.4028	0.5039	0.4389	0.4217	0.3603	0.5376	0.418
6.50005	0.8323	0.6211	0.4929	0.9597	0.456	0.5583	0.8969	0.6198	1.0943	0.5569	0.5569	0.4762	0.6304	0.443	0.473	0.4339	0.4284	0.4002	0.4475	0.6343	0.7259	0.6116	0.5394	0.425	0.5469	0.5792	0.6329	0.8073	0.6738	0.6014	0.5288	0.5006	0.437	0.5018	0.4078	0.4371	0.457	0.4785	0.4229	0.4205	0.4164	0.577	0.3995	0.5066	0.4393	0.4208	0.3549	0.5396	0.4237
6.58334	0.8498	0.6242	0.5011	0.955	0.4532	0.5592	0.893	0.6177	1.0937	0.5557	0.5569	0.4794	0.6305	0.4468	0.4714	0.4341	0.4295	0.4021	0.4451	0.6349	0.7327	0.6197	0.5529	0.4266	0.547	0.5939	0.6373	0.8075	0.6805	0.6086	0.5329	0.5087	0.4407	0.5023	0.4064	0.4401	0.4603	0.479	0.4237	0.4209	0.4188	0.5833	0.3979	0.5104	0.4396	0.4199	0.3525	0.5386	0.4245
6.66675	0.8807	0.6163	0.5085	0.962	0.4542	0.5576	0.9035	0.62	1.091	0.5601	0.5601	0.4838	0.6361	0.4503	0.4787	0.4359	0.4329	0.4043	0.4469	0.6403	0.745	0.627	0.5688	0.4293	0.5595	0.6107	0.6411	0.8124	0.6883	0.6135	0.5424	0.5107	0.4411	0.5019	0.403	0.4399	0.4608	0.4783	0.4219	0.4205	0.4187	0.5881	0.3943	0.5204	0.4374	0.418	0.3508	0.5443	0.4273
6.75002	0.8728	0.6274	0.5141	0.962	0.4527	0.5593	0.9058	0.6161	1.0908	0.5592	0.5587	0.4834	0.6322	0.4513	0.4764	0.4356	0.4337	0.4	0.445	0.6391	0.7508	0.63	0.5768	0.4306	0.5622	0.6167	0.6409	0.8125	0.6936	0.6146	0.5517	0.5137	0.4407	0.5002	0.3998	0.4422	0.4606	0.4766	0.4169	0.4186	0.4208	0.5902	0.3912	0.5301	0.4323	0.4161	0.3525	0.5469	0.4301
6.83336	0.8662	0.6385	0.524	0.96	0.4579	0.5669	0.9163	0.6223	1.103	0.5665	0.5649	0.4896	0.6386	0.4645	0.4763	0.4394	0.4395	0.4053	0.4453	0.646	0.7745	0.6425	0.5962	0.4349	0.5715	0.6313	0.651	0.8211	0.7041	0.6213	0.5904	0.5202	0.4454	0.5023	0.4004	0.4472	0.4649	0.4782	0.4166	0.4215	0.426	0.5975	0.3919	0.5704	0.4313	0.4168	0.3513	0.5498	0.4339
6.91673	0.8532	0.6398	0.5291	0.9661	0.4562	0.5605	0.9162	0.6185	1.1106	0.5675	0.5653	0.4907	0.6371	0.4655	0.4764	0.4367	0.438	0.4032	0.441	0.6421	0.7879	0.6481	0.6085	0.4323	0.5729	0.6407	0.6573	0.8165	0.7096	0.6255	0.6482	0.5238	0.4485	0.5024	0.3998	0.4479	0.468	0.4785	0.4144	0.4217	0.4267	0.6016	0.3912	0.6303	0.4283	0.4182	0.3538	0.5494	0.444
7.00007	0.8567	0.6474	0.5436	0.9547	0.4596	0.5514	0.9228	0.6235	1.1164	0.5708	0.5685	0.494	0.6404	0.4639	0.491	0.4403	0.4391	0.4044	0.4463	0.6472	0.8056	0.6575	0.6326	0.4364	0.5835	0.6503	0.6641	0.8262	0.7148	0.634	0.6703	0.5278	0.4493	0.5008	0.401	0.4507	0.4688	0.4768	0.4144	0.4218	0.429	0.6108	0.3924	0.6533	0.4279	0.4203	0.3574	0.5556	0.4479
7.08335	0.8667	0.6358	0.5492	0.9633	0.4615	0.5548	0.9284	0.6287	1.1331	0.5756	0.5693	0.4955	0.6415	0.4643	0.4958	0.4397	0.4388	0.4066	0.4499	0.6505	0.8208	0.6645	0.6467	0.4381	0.5906	0.6578	0.6728	0.8333	0.7222	0.6383	0.6769	0.5285	0.4511	0.5007	0.4027	0.4505	0.4705	0.4767	0.4124	0.4224	0.4294	0.615	0.394	0.6601	0.4256	0.422	0.3589	0.5552	0.452
7.16671	0.8931	0.6307	0.5488	0.9932	0.4629	0.5675	0.9364	0.6356	1.1437	0.5871	0.5738	0.4939	0.6374	0.4675	0.5098	0.4416	0.4405	0.4086	0.4525	0.6532	0.8332	0.67	0.6608	0.4414	0.5942	0.6645	0.6853	0.8384	0.7315	0.6454	0.682	0.5296	0.4511	0.5035	0.403	0.4493	0.47	0.4795	0.4085	0.4218	0.4272	0.6222	0.394	0.6658	0.421	0.4245	0.3654	0.5557	0.4589
7.25006	0.8688	0.6324	0.5427	0.983	0.4634	0.5694	0.9357	0.6369	1.148	0.59	0.5706	0.4883	0.6438	0.467	0.5131	0.4364	0.4399	0.4114	0.4502	0.6514	0.8408	0.67	0.6664	0.4406	0.5979	0.6662	0.696	0.8354	0.7375	0.6487	0.6809	0.5374	0.4514	0.5075	0.4029	0.449	0.4703	0.4838	0.4067	0.4223	0.4268	0.6264	0.394	0.6654	0.4191	0.426	0.3674	0.5608	0.4629
7.3334	0.8771	0.6038	0.5444	0.9772	0.4662	0.5703	0.9409	0.6392	1.1588	0.5847	0.5673	0.4903	0.6319	0.4589	0.5296	0.4355	0.4379	0.4078	0.4511	0.6498	0.8448	0.6671	0.6736	0.4397	0.5993	0.6621	0.6939	0.8409	0.7349	0.6532	0.6846	0.5402	0.4515	0.5092	0.4039	0.4482	0.4708	0.4851	0.4034	0.423	0.4257	0.6317	0.3948	0.6686	0.4153	0.4271	0.3708	0.5598	0.4661
7.41675	0.9126	0.6101	0.5517	1.0009	0.4729	0.573	0.9467	0.6446	1.1829	0.5922	0.5743	0.4931	0.6403	0.467	0.5397	0.4393	0.4427	0.4169	0.4524	0.6536	0.8575	0.6704	0.6812	0.4462	0.6044	0.672	0.7099	0.8423	0.7501	0.6604	0.6893	0.5451	0.4549	0.5123	0.4071	0.4501	0.4739	0.4885	0.4034	0.4254	0.4272	0.6386	0.398	0.6732	0.4158	0.4313	0.3718	0.562	0.4699
7.50007	0.936	0.5835	0.5539	1.0422	0.4767	0.5791	0.9517	0.6443	1.1849	0.5957	0.5726	0.4956	0.6336	0.4612	0.5449	0.4387	0.4395	0.4125	0.4513	0.6525	0.8582	0.6638	0.6827	0.445	0.6035	0.6686	0.709	0.8432	0.747	0.6575	0.6858	0.5413	0.4516	0.5105	0.4072	0.4467	0.4707	0.4864	0.4003	0.4257	0.4241	0.6363	0.398	0.6704	0.4117	0.4308	0.3744	0.5626	0.4693
7.58346	0.9814	0.5588	0.5616	1.0642	0.4791	0.5863	0.9596	0.649	1.2014	0.6043	0.5761	0.5007	0.6351	0.4585	0.555	0.4409	0.4374	0.4157	0.4525	0.6541	0.8635	0.6638	0.6933	0.4513	0.6072	0.672	0.7137	0.849	0.7502	0.661	0.6874	0.5496	0.452	0.5159	0.4105	0.4488	0.4707	0.492	0.4045	0.427	0.4258	0.6392	0.4012	0.6716	0.4162	0.4382	0.3801	0.5654	0.4741
7.66679	1.0055	0.5353	0.5644	1.0957	0.4823	0.597	0.9605	0.6525	1.2074	0.6142	0.5829	0.508	0.6328	0.4593	0.5609	0.4391	0.4375	0.4179	0.4521	0.655	0.8645	0.6686	0.6976	0.4539	0.6066	0.6744	0.7185	0.8471	0.7534	0.6692	0.6885	0.5512	0.4533	0.5211	0.4128	0.4519	0.4724	0.4971	0.4049	0.4313	0.4291	0.6488	0.4033	0.6718	0.4163	0.4467	0.3761	0.5621	0.4688
7.75004	1.0225	0.4935	0.5611	1.1059	0.4819	0.6008	0.9483	0.6481	1.2016	0.613	0.5845	0.5154	0.6235	0.4515	0.5603	0.4353	0.4325	0.4107	0.4491	0.6471	0.8536	0.6659	0.6925	0.4525	0.6004	0.6667	0.7141	0.8419	0.7471	0.6702	0.6799	0.552	0.4482	0.5213	0.4103	0.4504	0.4675	0.497	0.4035	0.4318	0.4274	0.6504	0.4008	0.6633	0.4146	0.4459	0.3783	0.5636	0.471
7.83338	1.0466	0.4904	0.5666	1.1143	0.4882	0.6166	0.9563	0.6555	1.2074	0.6245	0.589	0.5191	0.6318	0.4548	0.5696	0.438	0.4357	0.4102	0.4512	0.6529	0.855	0.6773	0.7005	0.4577	0.6036	0.6731	0.7224	0.8536	0.7565	0.6739	0.6788	0.5653	0.4519	0.5225	0.4142	0.4531	0.4705	0.4994	0.4107	0.4293	0.4288	0.6528	0.4049	0.6604	0.423	0.4482	0.3791	0.5672	0.4718
7.91667	1.0767	0.4846	0.571	1.1373	0.4906	0.6168	0.9584	0.6623	1.2102	0.6286	0.5946	0.52	0.6249	0.4557	0.5767	0.4399	0.4352	0.4111	0.4544	0.6554	0.858	0.6818	0.7042	0.4578	0.6045	0.6749	0.7241	0.855	0.7589	0.673	0.6714	0.5619	0.4534	0.5238	0.4125	0.4522	0.4732	0.4996	0.4045	0.4345	0.4283	0.6519	0.4027	0.6538	0.4155	0.4476	0.3807	0.5672	0.4748
8.00009	1.0828	0.4718	0.5715	1.139	0.4946	0.6193	0.954	0.667	1.2036	0.6285	0.5889	0.5064	0.6311	0.4593	0.5741	0.4371	0.4361	0.4201	0.4521	0.6542	0.8487	0.6776	0.7056	0.4583	0.6014	0.6745	0.7312	0.8526	0.7652	0.6761	0.6668	0.5629	0.4555	0.5285	0.4129	0.4521	0.475	0.5046	0.4081	0.4372	0.4288	0.6558	0.403	0.6485	0.4192	0.4501	0.3821	0.5673	0.4768
8.0834	1.0949	0.4634	0.5743	1.1418	0.4954	0.6213	0.9504	0.6634	1.1954	0.6194	0.5869	0.5054	0.6219	0.4555	0.5753	0.4362	0.4308	0.4204	0.4509	0.6527	0.8428	0.6883	0.7081	0.4605	0.5983	0.6742	0.7218	0.8526	0.7592	0.6831	0.6638	0.5659	0.4597	0.5292	0.4152	0.4521	0.479	0.5056	0.4116	0.437	0.4285	0.6613	0.4051	0.6451	0.4227	0.4515	0.3849	0.5673	0.4794
8.16667	1.1078	0.4467	0.5753	1.149	0.4926	0.6236	0.9511	0.6629	1.1934	0.6196	0.5842	0.5026	0.6159	0.4533	0.5748	0.4357	0.4297	0.4235	0.4526	0.6486	0.8385	0.6952	0.7118	0.4599	0.594	0.6754	0.7198	0.8493	0.758	0.6813	0.6595	0.5697	0.4644	0.5316	0.414	0.4539	0.4842	0.5072	0.4116	0.4347	0.4307	0.6609	0.4039	0.6411	0.4228	0.4513	0.3869	0.5718	0.4804
8.25	1.1092	0.4321	0.574	1.1423	0.4902	0.6247	0.9534	0.662	1.1897	0.6198	0.5862	0.5058	0.6072	0.4514	0.5764	0.4347	0.4283	0.4203	0.4529	0.6452	0.8353	0.6995	0.7139	0.4601	0.5858	0.6776	0.7207	0.8512	0.7576	0.6842	0.6557	0.5722	0.4708	0.5354	0.4158	0.4541	0.4902	0.5116	0.4099	0.4372	0.4305	0.6638	0.4058	0.6368	0.4209	0.4523	0.3884	0.5729	0.4798
8.3334	1.1283	0.416	0.5846	1.1621	0.4913	0.6293	0.9675	0.6661	1.1954	0.6268	0.5944	0.5146	0.616	0.4565	0.5808	0.4386	0.4341	0.4268	0.4573	0.6498	0.8406	0.6919	0.7217	0.4667	0.5874	0.6845	0.7281	0.8558	0.7692	0.6891	0.6534	0.5743	0.4775	0.5369	0.4167	0.4556	0.4974	0.5128	0.415	0.4396	0.4321	0.6685	0.4068	0.6344	0.4259	0.4523	0.3873	0.5681	0.4739
8.41675	1.1303	0.4153	0.5857	1.1632	0.4909	0.6204	0.9732	0.6612	1.1839	0.6259	0.5944	0.5151	0.6059	0.4506	0.5852	0.4393	0.4333	0.4225	0.4592	0.6514	0.8366	0.7005	0.7253	0.4673	0.5823	0.6885	0.7251	0.8647	0.7661	0.6887	0.6481	0.575	0.4801	0.537	0.4149	0.4553	0.5	0.5128	0.4116	0.4366	0.4318	0.6687	0.4051	0.6286	0.4228	0.4513	0.3967	0.5712	0.4743
8.5001	1.0918	0.4411	0.5805	1.1399	0.485	0.6266	0.9667	0.655	1.1726	0.6251	0.5883	0.5014	0.6093	0.4521	0.5667	0.4336	0.4341	0.4291	0.4535	0.6453	0.8318	0.7021	0.7144	0.4622	0.5688	0.6888	0.73	0.8439	0.7716	0.6965	0.6485	0.5846	0.492	0.5463	0.4182	0.4592	0.5122	0.5222	0.4175	0.4398	0.4358	0.6764	0.4081	0.6292	0.429	0.4537	0.3962	0.568	0.4684
8.58343	1.0979	0.4864	0.5983	1.1431	0.4894	0.6175	0.9799	0.6546	1.1674	0.6273	0.5947	0.5107	0.606	0.4489	0.5734	0.438	0.4392	0.4304	0.4614	0.6498	0.8334	0.6929	0.7222	0.4671	0.5703	0.6922	0.7278	0.851	0.7722	0.6941	0.6454	0.5859	0.4962	0.5533	0.4183	0.4582	0.5168	0.5289	0.4209	0.4399	0.4341	0.6731	0.4076	0.6252	0.4326	0.4596	0.4006	0.5717	0.4686
8.66668	1.08	0.5253	0.6006	1.13	0.4896	0.612	0.9825	0.6525	1.1665	0.6276	0.5927	0.5076	0.6113	0.449	0.5704	0.437	0.4395	0.4297	0.4606	0.6553	0.8295	0.6818	0.72	0.4657	0.564	0.6955	0.7253	0.8476	0.7715	0.6923	0.6399	0.5868	0.4973	0.5606	0.4201	0.4581	0.518	0.5366	0.4228	0.4395	0.4342	0.6714	0.4094	0.62	0.4343	0.4691	0.3997	0.5662	0.4647
8.75005	1.0662	0.5059	0.5976	1.1419	0.491	0.6084	0.9844	0.648	1.1595	0.6258	0.5895	0.4996	0.6152	0.4507	0.5671	0.4372	0.4406	0.431	0.4606	0.6612	0.8279	0.6915	0.7229	0.4624	0.5568	0.7026	0.7279	0.8473	0.7738	0.6921	0.639	0.5914	0.5022	0.5692	0.4228	0.4608	0.5229	0.5453	0.4243	0.4392	0.4367	0.6713	0.4118	0.6183	0.4362	0.472	0.3915	0.5725	0.4615
8.83341	1.0657	0.4628	0.6021	1.1526	0.4902	0.6054	0.9929	0.6504	1.1581	0.6252	0.5992	0.5108	0.6154	0.4505	0.5675	0.4387	0.4413	0.4307	0.466	0.6633	0.8268	0.6824	0.7289	0.46	0.5541	0.7062	0.7299	0.8452	0.777	0.6885	0.6384	0.5927	0.5018	0.5697	0.4218	0.4615	0.522	0.5457	0.4221	0.4352	0.437	0.6673	0.4112	0.6169	0.4344	0.4665	0.393	0.5715	0.4638
8.91674	1.0492	0.4278	0.5974	1.1452	0.488	0.6217	0.9854	0.6418	1.1486	0.6209	0.6049	0.5259	0.5969	0.4437	0.5638	0.4348	0.4376	0.4276	0.4638	0.6503	0.8166	0.6876	0.7281	0.4514	0.5477	0.7025	0.7228	0.835	0.7716	0.685	0.6349	0.5946	0.5008	0.5758	0.4229	0.4652	0.5215	0.5525	0.4176	0.4327	0.4408	0.6635	0.4123	0.6124	0.4297	0.4643	0.4006	0.5707	0.4615
9.00005	1.0379	0.4207	0.5869	1.1415	0.4866	0.6125	0.9883	0.6423	1.1474	0.62	0.6007	0.5158	0.5964	0.4416	0.5577	0.4362	0.437	0.4268	0.4622	0.6485	0.8149	0.6914	0.7275	0.4491	0.5475	0.7077	0.7264	0.8301	0.7739	0.6863	0.63	0.6044	0.5065	0.5792	0.4258	0.4646	0.5273	0.555	0.4172	0.4348	0.4398	0.6653	0.415	0.6089	0.4291	0.4605	0.4234	0.5691	0.4616
9.0834	1.0243	0.4147	0.5831	1.1439	0.4893	0.5932	0.9927	0.6388	1.142	0.6167	0.5999	0.5144	0.594	0.4405	0.5554	0.4382	0.4365	0.4283	0.4629	0.647	0.8138	0.6797	0.7272	0.4455	0.5427	0.706	0.7218	0.8291	0.7734	0.6774	0.6212	0.6065	0.5043	0.5764	0.4217	0.464	0.5251	0.552	0.413	0.4347	0.4391	0.6557	0.4111	0.5998	0.4246	0.452	0.4242	0.5597	0.4595
9.16674	1.0022	0.4116	0.5791	1.1298	0.4852	0.6084	0.9853	0.6321	1.1283	0.609	0.5895	0.4979	0.5834	0.4388	0.5472	0.4353	0.4344	0.4235	0.4587	0.6386	0.8061	0.6705	0.7211	0.44	0.5346	0.7029	0.7147	0.8158	0.7673	0.6735	0.6184	0.6157	0.5061	0.5791	0.424	0.4663	0.5266	0.5561	0.4145	0.4349	0.4413	0.6517	0.4139	0.5977	0.4259	0.4514	0.436	0.5645	0.4626
9.25008	0.9954	0.4172	0.5835	1.1513	0.4857	0.6387	0.9889	0.6331	1.1287	0.6101	0.5856	0.494	0.5847	0.4412	0.5519	0.437	0.4369	0.4268	0.4613	0.6417	0.8039	0.6834	0.7231	0.4392	0.5337	0.7134	0.7209	0.809	0.7708	0.6638	0.6159	0.6178	0.5092	0.5855	0.4243	0.4667	0.5296	0.5619	0.4163	0.4378	0.442	0.6423	0.414	0.5955	0.4274	0.4501	0.4474	0.5645	0.4622
9.33341	0.9702	0.423	0.5862	1.1346	0.4827	0.6463	1.0077	0.6338	1.121	0.6086	0.5825	0.4842	0.5888	0.4432	0.5519	0.4395	0.4387	0.4256	0.4622	0.6393	0.8115	0.6893	0.7263	0.4437	0.5331	0.7249	0.7244	0.8124	0.7772	0.6588	0.6141	0.6168	0.507	0.5873	0.4219	0.4665	0.5274	0.5638	0.4125	0.4338	0.4413	0.6368	0.4117	0.5933	0.4236	0.4453	0.4466	0.5662	0.461
9.41675	0.9494	0.4217	0.5919	1.1197	0.4824	0.6508	1.0058	0.6325	1.1027	0.6068	0.5822	0.4819	0.5705	0.4404	0.5547	0.437	0.4401	0.4256	0.4615	0.6285	0.8029	0.673	0.724	0.4408	0.5295	0.7213	0.7261	0.8025	0.7751	0.6565	0.6161	0.6206	0.5074	0.5896	0.4239	0.464	0.5279	0.5654	0.4136	0.4358	0.4388	0.6345	0.4135	0.5952	0.4242	0.4424	0.4378	0.5648	0.4587
9.50008	0.9237	0.4261	0.6006	1.1151	0.484	0.6645	1.0113	0.6315	1.0886	0.6007	0.5831	0.4877	0.5628	0.4421	0.5554	0.4358	0.4397	0.4259	0.4598	0.6235	0.8033	0.6855	0.7251	0.4411	0.529	0.725	0.7252	0.81	0.7764	0.6543	0.6179	0.6241	0.5083	0.5955	0.4236	0.4653	0.5288	0.5717	0.4159	0.4357	0.4403	0.6315	0.4133	0.5977	0.4269	0.4413	0.4393	0.5652	0.4588
9.58338	0.9077	0.43	0.6063	1.1178	0.4841	0.6641	1.0103	0.6336	1.0731	0.5957	0.586	0.4941	0.5608	0.4433	0.555	0.4357	0.4396	0.4245	0.462	0.6258	0.8008	0.7087	0.7256	0.4423	0.5284	0.7305	0.7238	0.808	0.7768	0.653	0.6201	0.6339	0.5106	0.5987	0.4238	0.4676	0.5311	0.5748	0.4181	0.4381	0.4422	0.6308	0.4131	0.5996	0.4296	0.4408	0.4514	0.5647	0.4593
9.66675	0.8865	0.4439	0.6107	1.1021	0.4806	0.6696	1.0094	0.6342	1.0618	0.5896	0.5863	0.492	0.5623	0.443	0.5576	0.4351	0.4417	0.4248	0.4613	0.625	0.7988	0.6898	0.7279	0.4452	0.5318	0.7268	0.7214	0.8077	0.7744	0.6561	0.6188	0.6574	0.511	0.6055	0.4242	0.4673	0.5318	0.5826	0.4153	0.4362	0.4408	0.6333	0.4138	0.5985	0.4269	0.4484	0.4519	0.5642	0.4606
9.75008	0.8595	0.462	0.6235	1.1014	0.4856	0.6765	1.017	0.6362	1.0557	0.5914	0.5893	0.4934	0.564	0.4469	0.5588	0.4372	0.4433	0.4255	0.464	0.6284	0.8022	0.6812	0.7327	0.4489	0.5347	0.7282	0.7241	0.8077	0.776	0.6609	0.6213	0.6716	0.5138	0.6112	0.4257	0.4708	0.5344	0.5875	0.4132	0.437	0.444	0.6382	0.4152	0.6007	0.4244	0.4489	0.4569	0.5668	0.4597
9.83336	0.8317	0.4662	0.6279	1.1044	0.4835	0.6689	1.0076	0.6278	1.0291	0.5799	0.5927	0.4948	0.5541	0.4405	0.5525	0.4366	0.447	0.4216	0.4648	0.6171	0.7862	0.6832	0.7214	0.4481	0.5308	0.7307	0.7163	0.7991	0.7722	0.6509	0.6187	0.6801	0.5129	0.612	0.4244	0.4696	0.5337	0.5882	0.4083	0.4314	0.442	0.6284	0.4138	0.5976	0.4194	0.4504	0.4562	0.5653	0.458
Summary data
	Act 21% 340/380				Act 1% 340/380
	Mean	SD	n	SEM	Mean	SD	n	SEM
Time (min)
0	0.393819	0.0706974	249	0.00448027	0.333928	0.0942625	128	0.0083317		Statistical tests showed in panel FigS5D
0.08334	0.420843	0.0682383	249	0.00432442	0.3666	0.0448442	128	0.00396371
0.166747	0.420204	0.0684243	249	0.00433622	0.36712	0.0454709	128	0.00401909
0.250197	0.465473	0.0593965	249	0.0037641	0.368306	0.0459849	128	0.00406453
0.333438	0.46546	0.059168	249	0.00374962	0.369906	0.0471034	128	0.00416339
0.416782	0.465286	0.0584813	249	0.0037061	0.371216	0.046701	128	0.00412782
0.500013	0.466349	0.0588227	249	0.00372773	0.373709	0.0487897	128	0.00431244
0.583437	0.465984	0.05925	249	0.00375482	0.371745	0.0476715	128	0.00421361
0.666713	0.466027	0.0592894	249	0.00375731	0.371329	0.0458419	128	0.00405189
0.750005	0.467294	0.0592537	249	0.00375505	0.370548	0.0455039	128	0.00402201
0.833405	0.467472	0.0589239	249	0.00373415	0.372292	0.0437367	128	0.00386582
0.916745	0.467556	0.0593252	249	0.00375958	0.373222	0.0449196	128	0.00397037
1.00004	0.465972	0.058774	249	0.00372465	0.374727	0.0450293	128	0.00398007
1.08337	0.466624	0.0587395	249	0.00372247	0.37353	0.0441711	128	0.00390421
1.16668	0.466798	0.058672	249	0.00371819	0.374037	0.0433485	128	0.0038315
1.25001	0.466451	0.0584227	249	0.00370239	0.37565	0.0417337	128	0.00368878
1.33341	0.466202	0.0581557	249	0.00368547	0.374946	0.0410251	128	0.00362614
1.41672	0.468071	0.0589235	249	0.00373413	0.373609	0.0410216	128	0.00362583
1.50003	0.46721	0.0583506	249	0.00369782	0.373604	0.0422509	128	0.00373449
1.58338	0.466238	0.0586209	249	0.00371495	0.374257	0.0438105	128	0.00387234
1.66671	0.467107	0.0592714	249	0.00375617	0.375181	0.0420748	128	0.00371892
1.75005	0.465893	0.0590901	249	0.00374468	0.373584	0.0405351	128	0.00358283
1.83348	0.466256	0.0588725	249	0.0037309	0.373155	0.0407208	128	0.00359925
1.91676	0.467918	0.0589742	249	0.00373734	0.373741	0.0403714	128	0.00356836
2.00007	0.46728	0.0592326	249	0.00375371	0.373108	0.039679	128	0.00350716
2.08338	0.46682	0.0592954	249	0.0037577	0.371823	0.0395394	128	0.00349482
2.16675	0.46765	0.0596578	249	0.00378066	0.372935	0.0400452	128	0.00353953
2.25005	0.466433	0.0591222	249	0.00374671	0.37307	0.0405744	128	0.0035863
2.33339	0.466909	0.0591555	249	0.00374883	0.372955	0.0427186	128	0.00377582
2.41668	0.467635	0.0594383	249	0.00376675	0.373638	0.0438716	128	0.00387773
2.50004	0.468841	0.05919	249	0.00375101	0.371594	0.0442522	128	0.00391138
2.58335	0.468382	0.059749	249	0.00378644	0.372396	0.0448454	128	0.00396381
2.66673	0.468027	0.0592028	249	0.00375183	0.372391	0.0423571	128	0.00374388
2.7501	0.466484	0.0590591	249	0.00374272	0.374015	0.0425299	128	0.00375915
2.83341	0.468727	0.0587621	249	0.0037239	0.372786	0.0434321	128	0.00383889
2.91671	0.468578	0.058317	249	0.00369569	0.373945	0.0429395	128	0.00379535
3.00005	0.467337	0.0587357	249	0.00372223	0.371802	0.0420059	128	0.00371284
3.08335	0.469056	0.0594422	249	0.003767	0.37153	0.0419437	128	0.00370733
3.16668	0.46993	0.0598285	249	0.00379148	0.371666	0.0416619	128	0.00368243
3.25007	0.468372	0.0600598	249	0.00380613	0.371375	0.0416634	128	0.00368256
3.33343	0.46832	0.0595218	249	0.00377204	0.372595	0.0418406	128	0.00369822
3.41675	0.46911	0.0593356	249	0.00376024	0.371789	0.0421065	128	0.00372172
3.50007	0.46857	0.0596172	249	0.00377809	0.371152	0.041532	128	0.00367095
3.5834	0.468744	0.0599405	249	0.00379857	0.372439	0.042425	128	0.00374988
3.66676	0.469258	0.060951	249	0.00386261	0.373691	0.0429749	128	0.00379848
3.75009	0.469435	0.0606061	249	0.00384075	0.372406	0.043007	128	0.00380131
3.83335	0.46811	0.0608163	249	0.00385407	0.372683	0.0424398	128	0.00375118
3.91669	0.470019	0.0614771	249	0.00389595	0.372641	0.0421577	128	0.00372625
4.00004	0.470853	0.0612228	249	0.00387983	0.372341	0.0441807	128	0.00390506
4.08343	0.471752	0.0616035	249	0.00390396	0.372399	0.0429186	128	0.00379351
4.16672	0.470908	0.0604731	249	0.00383233	0.373846	0.0440836	128	0.00389648
4.2501	0.47114	0.0607275	249	0.00384845	0.375541	0.044941	128	0.00397226
4.33339	0.474059	0.0605498	249	0.00383719	0.378638	0.0474637	128	0.00419524
4.41675	0.473669	0.0603708	249	0.00382584	0.403387	0.0757731	128	0.00669746
4.50007	0.479009	0.0596567	249	0.00378059	0.443516	0.0894677	128	0.0079079
4.58337	0.490082	0.0606262	249	0.00384203	0.496246	0.11684	128	0.0103273
4.66676	0.500042	0.0606478	249	0.0038434	0.559794	0.160073	128	0.0141486
4.75009	0.508073	0.061568	249	0.00390172	0.578957	0.147663	128	0.0130517
4.83338	0.514056	0.0628205	249	0.00398109	0.593944	0.139001	128	0.0122861
4.91674	0.516546	0.0626301	249	0.00396902	0.597698	0.132781	128	0.0117363
5.00007	0.517697	0.0619622	249	0.0039267	0.591288	0.123443	128	0.0109109
5.08338	0.518849	0.063083	249	0.00399772	0.581388	0.117675	128	0.0104011
5.16673	0.517539	0.0613372	249	0.00388708	0.572709	0.11277	128	0.00996754
5.25011	0.514741	0.0618885	249	0.00392203	0.558236	0.111862	128	0.00988727
5.33333	0.512594	0.0623156	249	0.00394909	0.547767	0.113267	128	0.0100115
5.41673	0.510108	0.0626682	249	0.00397144	0.535153	0.113211	128	0.0100066
5.50007	0.507288	0.0628181	249	0.00398093	0.528332	0.113862	128	0.0100641
5.58337	0.504997	0.0633508	249	0.0040147	0.521402	0.115763	128	0.0102321
5.66672	0.503143	0.0635515	249	0.00402741	0.513723	0.115665	128	0.0102234
5.75004	0.503133	0.0635371	249	0.0040265	0.509889	0.115836	128	0.0102386
5.83332	0.500757	0.063188	249	0.00400438	0.504842	0.116742	128	0.0103186
5.91672	0.502438	0.0640455	249	0.00405872	0.503203	0.117332	128	0.0103708
6.00013	0.501354	0.0644509	249	0.00408441	0.501947	0.118174	128	0.0104452
6.08342	0.501109	0.0634863	249	0.00402328	0.501351	0.119254	128	0.0105407
6.16673	0.502026	0.0630951	249	0.00399849	0.500705	0.119356	128	0.0105497
6.25008	0.504376	0.062956	249	0.00398968	0.502807	0.121186	128	0.0107114
6.33332	0.506168	0.0644144	249	0.0040821	0.505327	0.121293	128	0.0107209
6.41678	0.508498	0.0648633	249	0.00411054	0.509416	0.122566	128	0.0108334
6.50005	0.510973	0.0658688	249	0.00417426	0.511862	0.1234	128	0.0109071
6.58334	0.51228	0.0652033	249	0.00413209	0.513198	0.124309	128	0.0109874
6.66675	0.514116	0.0661729	249	0.00419353	0.517466	0.125633	128	0.0111045
6.75002	0.515837	0.0673983	249	0.0042712	0.519463	0.125438	128	0.0110873
6.83336	0.515957	0.0686017	249	0.00434745	0.524205	0.127605	128	0.0112788
6.91673	0.516462	0.0681125	249	0.00431645	0.527537	0.128528	128	0.0113604
7.00007	0.517113	0.0683052	249	0.00432867	0.532194	0.129629	128	0.0114577
7.08335	0.515897	0.0678004	249	0.00429668	0.534037	0.131679	128	0.0116389
7.16671	0.517764	0.0677491	249	0.00429342	0.538508	0.134392	128	0.0118787
7.25006	0.51465	0.0662892	249	0.00420091	0.538906	0.133979	128	0.0118422
7.3334	0.515572	0.0661115	249	0.00418964	0.539594	0.134108	128	0.0118536
7.41675	0.51509	0.0657039	249	0.00416381	0.541964	0.137279	128	0.0121339
7.50007	0.514703	0.0656056	249	0.00415759	0.542302	0.13902	128	0.0122878
7.58346	0.515027	0.0647659	249	0.00410437	0.547239	0.141459	128	0.0125034
7.66679	0.516369	0.0648876	249	0.00411209	0.545387	0.143895	128	0.0127187
7.75004	0.516235	0.0649882	249	0.00411846	0.546698	0.144021	128	0.0127298
7.83338	0.516605	0.0651678	249	0.00412984	0.5502	0.145961	128	0.0129013
7.91667	0.517545	0.0651532	249	0.00412892	0.551709	0.14791	128	0.0130735
8.00009	0.515612	0.065278	249	0.00413683	0.553787	0.147253	128	0.0130155
8.0834	0.517781	0.0650593	249	0.00412297	0.553859	0.147274	128	0.0130173
8.16667	0.518114	0.0649269	249	0.00411457	0.556734	0.148057	128	0.0130865
8.25	0.517492	0.0647206	249	0.0041015	0.557198	0.148415	128	0.0131181
8.3334	0.51716	0.064129	249	0.00406401	0.557342	0.150841	128	0.0133326
8.41675	0.518841	0.0641418	249	0.00406482	0.560008	0.150892	128	0.0133371
8.5001	0.519844	0.0641413	249	0.00406479	0.558425	0.148088	128	0.0130893
8.58343	0.519869	0.0642097	249	0.00406913	0.561848	0.148051	128	0.013086
8.66668	0.520524	0.0644473	249	0.00408418	0.561142	0.146769	128	0.0129726
8.75005	0.522386	0.0647354	249	0.00410244	0.562388	0.147222	128	0.0130128
8.83341	0.521382	0.0646655	249	0.00409801	0.563293	0.147791	128	0.013063
8.91674	0.52247	0.0646421	249	0.00409653	0.559498	0.146571	128	0.0129552
9.00005	0.521243	0.0644764	249	0.00408602	0.55963	0.145974	128	0.0129024
9.0834	0.52179	0.0643665	249	0.00407906	0.55535	0.145244	128	0.0128379
9.16674	0.52237	0.0641347	249	0.00406437	0.557628	0.142735	128	0.0126161
9.25008	0.523269	0.0638814	249	0.00404832	0.558448	0.143473	128	0.0126813
9.33341	0.524917	0.0639725	249	0.00405409	0.559016	0.143365	128	0.0126718
9.41675	0.526613	0.064944	249	0.00411566	0.557228	0.141471	128	0.0125043
9.50008	0.523204	0.0637158	249	0.00403782	0.557871	0.140561	128	0.012424
9.58338	0.523562	0.063456	249	0.00402136	0.556852	0.139743	128	0.0123517
9.66675	0.524162	0.0630955	249	0.00399852	0.557169	0.137812	128	0.012181
9.75008	0.523811	0.0631436	249	0.00400157	0.558404	0.13631	128	0.0120482
9.83336	0.524233	0.0632373	249	0.0040075	0.557217	0.1341	128	0.0118529
[truncated: 200 more columns]
