# Supplementary material for: Oxygen levels at the time of activation determine T cell persistence and immunotherapeutic efficacy
Source: eLife journal article supplement (doi:10.7554/elife.84280), 2023-05-11
Supplement: fig5-figsupp1-data1 [file Figure 5 - figure supplement 1 - Source data 1.xlsx]

## Sheet: Fig 5B
nuclear fraction																																					Summary data
HIF-1a						NFAT nuclear						NFkB nuclear						NFIL3						PGC-1a						c-Myc								0.01									FG-4592
		Histone3	HIF1	norm	vs CT			Histone3	NFAT	norm	vs CT			Histone3	NFkB	norm	vs CT			Histone3	NFIL3	norm	vs CT			Histone3	PGC1a	norm	vs CT									HIF-1α	NFAT	NFkB	NFIL3	c-Myc	GLUT1	LDHA	PGC-1α		HIF-1α	NFAT	NFkB
n=1	CT	633575	499537	0.788442	1	n=1	CT	982375	11621376	11.8299	1	n=1	CT	633575	3474873	5.48455	1	n=1	CT	982375	8999410	9.16087	1	n=1	CT	982375	1285084	1.30814	1									10.2516	0.79306	0.901329	1.47766	0.61778	6.11141	1.70589	0.503597		25.709	0.917063	0.860111
	0.01	741750	5995406	8.08279	10.2516		0.01	840900	7889154	9.3818	0.79306		0.01	741750	3666753	4.94338	0.901329		0.01	840900	11382945	13.5366	1.47766		0.01	840900	553964	0.658775	0.503597									9.92391	0.735721	0.989312	1.34561	0.684068	3.52267	2.13582	1.27646		18.9212	0.576787	0.658391
	FG	678475	13752715	20.27	25.709		FG	676500	7339176	10.8487	0.917063		FG	678475	3200583	4.71732	0.860111		FG	676500	8507170	12.5753	1.37272		FG	676500	309700	0.457797	0.349961									14.1777	0.607118	0.730183	1.54187	2.13629	4.26612	1.6258	1.41665		23.5582	0.517088	0.992801
	RAP	548050	623524	1.13771	1.44299		RAP	603275	7565103	12.5401	1.06003		RAP	548050	3956172	7.21863	1.31618		RAP	603275	2815505	4.66703	0.509453		RAP	603275	174230	0.288807	0.220777									27.3774	1.36166	0.853647	1.72435	0.632469	2.23829	1.96685	1.19064		27.3774	1.11009	0.713026
n=2	N	728675	131683	0.180716	0.354497	n=2	N	664075	2357472	3.55001	0.279696	n=2	N	728675	1388793	1.90592	0.273615	n=2	N	664075	270270	0.406987	0.0333872	n=2	N	664075	257716	0.388083	0.289387									16.0768	0.817506	0.742441	0.955122		5.01114	2.46813	1.19829		16.0768	0.715076	0.82336
	CT	519675	264920	0.50978	1		CT	564425	7163910	12.6924	1		CT	519675	3619890	6.96568	1		CT	564425	6880300	12.1899	1		CT	564425	756922	1.34105	1									36.4486	0.772786	0.499873			2.87786	1.36548	1.02534		32.8388	0.962713	1.30767
	0.01	692050	3501088	5.05901	9.92391		0.01	675625	6309030	9.33806	0.735721		0.01	692050	4769079	6.89123	0.989312		0.01	675625	11082225	16.4029	1.34561		0.01	675625	1156530	1.71179	1.27646									17.2545	0.776208	0.940963			3.80023	1.49261			12.0108	1.21141	1.08521
	FG	610475	5888439	9.64567	18.9212		FG	667875	4889391	7.32082	0.576787		FG	610475	2799726	4.58614	0.658391		FG	667875	10209080	15.2859	1.25398		FG	667875	1127878	1.68876	1.25928										0.866245	1.7372			4.64154	2.09407				0.621466	1.09745
	RAP	613550	223443	0.364181	0.714388		RAP	660975	2764632	4.18266	0.32954		RAP	613550	3043389	4.9603	0.712105		RAP	660975	3723160	5.63283	0.462089		RAP	660975	1422112	2.15154	1.60437										0.671123	0.67306								0.714308	0.925092
n=3	N	1345675	93203	0.0692612	0.23079	n=3	N	964100	2303028	2.38879	0.174617	n=3	N	1345675	1205646	0.895941	0.225677	n=3	N	964100	277550	0.287885	0.0225606	n=3	N	964100	1029306	1.06763	0.78487										0.740681	1.13446								0.810857	1.07922
	CT	1170025	351130	0.300105	1		CT	797675	10912317	13.6802	1		CT	1170025	4645013	3.97001	1		CT	797675	10178735	12.7605	1		CT	797675	1085052	1.36027	1										0.852839	1.10877
	0.01	1092650	4649013	4.25481	14.1777		0.01	741925	6162039	8.30547	0.607118		0.01	1092650	3167414	2.89884	0.730183		0.01	741925	14597450	19.6751	1.54187		0.01	741925	1429712	1.92703	1.41665										0.777288	0.978437
	FG	1064250	7524172	7.06993	23.5582		FG	690250	4882722	7.07385	0.517088		FG	1064250	4194669	3.94143	0.992801		FG	690250	11647265	16.874	1.32236		cut these wells horizontaly by mistake													outlier determined with grubbs method (alpha = 0.05)
	RAP	917875	212602	0.231624	0.771811		RAP	759800	4003077	5.26859	0.385127		RAP	917875	4416151	4.81128	1.21191		RAP	759800	5626145	7.40477	0.580288														One sample t test									One sample t test
n=4	CT	1347375	147852	0.109733	1	n=4	CT	791000	2893722	3.65831	1	n=4	CT	1347375	3161182	2.34618	1	n=4	CT	791000	8218875	10.3905	1	n=4	CT	791000	2528136	3.19613	1								t, df	t=4.837, df=6	t=10.33, df=10	t=2.270, df=10	t=3.176, df=4	t=17.70, df=2	t=7.042, df=7	t=6.510, df=7	t=3.473, df=4	t, df	t=7.912, df=6	t=2.526, df=9	t=0.7333, df=9
	0.01	1526275	4585262	3.00422	27.3774		0.01	779775	3884361	4.98139	1.36166		0.01	1526275	3056837	2.00281	0.853647		0.01	779775	13971125	17.9169	1.72435		0.01	779775	2967393	3.80545	1.19064								P value (two tailed)	0.003	<0.001	0.05	0.03	0.003	<0.001	<0.001	0.03	P value (two tailed)	<0.001	0.03	0.48
n=5	CT	1646975	230177	0.139757	1	n=5	CT	743125	4730544	6.36574	1	n=5	CT	1646975	3496234	2.12282	1	n=5	CT	743125	9650270	12.9861	1	n=5	CT	743125	2494674	3.357	1								P value summary	**	***	*	*	**	***	***	*	P value summary	***	*	ns
	0.01	1405800	3158616	2.24685	16.0768		0.01	724650	3771105	5.20404	0.817506		0.01	1405800	2215640	1.57607	0.742441		0.01	724650	8988035	12.4033	0.955122		0.01	724650	2915016	4.02265	1.19829								Significant (alpha=0.05)?	Yes	Yes	Yes	Yes	Yes	Yes	Yes	Yes	Significant (alpha=0.05)?	Yes	Yes	No
								HDAC1	NFAT	norm	vs CT			HDAC1	NFkb	norm	vs CT									HDAC1	PGC1a	norm	vs CT
						n=6	CT	189926	3769301	19.8462	1	n=6	CT	189926	2277074	11.9893	1							n=6	CT	189926	2053907	10.8142	1
							0.01	234738	3600137	15.3368	0.772786		0.01	234738	1406811	5.99311	0.499873								0.01	234738	2602839	11.0883	1.02534
							FG	168525	3712765	22.0309	1.11009		FG	168525	1440663	8.54866	0.713026								FG	168525	1998851	11.8609	1.09678
							RAP	140558	3986824	28.3643	1.42921		RAP	140558	1496277	10.6453	0.887899								RAP	140558	1750396	12.4532	1.15155
		HDAC1	HIF1	norm	vs CT			LMNB1	NFAT	norm	vs CT			HDAC1	NFkb	norm	vs CT
n=7	CT	682488	243236	0.356396	1	n=7	CT	2975025	12045530	4.04888	1	n=7	CT	682488	2492534	3.65213	1
	0.01	708224	9199924	12.9901	36.4486		0.01	2905375	9130940	3.14278	0.776208		0.01	708224	2433824	3.43652	0.940963
	FG	935361	10947116	11.7036	32.8388		FG	3753475	10867290	2.89526	0.715076		FG	935361	2812646	3.00702	0.82336
	RAP	888699	254252	0.286095	0.802744		RAP	2750125	12043220	4.37915	1.08157		RAP	888699	3733462	4.20104	1.1503
n=8	CT	485553	915518	1.88552	1	n=8	CT	2881800	13566805	4.70775	1	n=8	CT	485553	4074550	8.39157	1
	0.01	295680	9619552	32.5337	17.2545		0.01	1958825	7988225	4.07807	0.866245		0.01	295680	4310378	14.5778	1.7372
	FG	592020	13407220	22.6466	12.0108		FG	1816825	8234240	4.53221	0.962713		FG	592020	6496480	10.9734	1.30767
	RAP	672024	535534	0.796897	0.422641		RAP	1407425	7796355	5.53945	1.17666		RAP	672024	7734520	11.5093	1.37153
								TPS	NFAT	norm	vs CT			TPS	NFkb	norm	vs CT															TPS	c-Myc	norm	vs CT
						n=9	CT	31598067	2572560	0.0814151	1	n=9	CT	31598067	2159226	0.0683341	1													n=9	CT	9052202	5380320	0.594366	1
							FG	29032762	2863408	0.0986268	1.21141		FG	29032762	2152980	0.0741569	1.08521														FG	8140022	6767952	0.831441	1.39887
							0.01	26353676	1439952	0.0546395	0.671123		0.01	26353676	1212084	0.045993	0.67306														0.01	6778997	2489160	0.367187	0.61778
						n=10	CT	27576770	1945616	0.0705527	1	n=10	CT	27576770	592902	0.0215001	1													n=10	CT	6016823	7801824	1.29667	1
							FG	23008119	1008816	0.0438461	0.621466		FG	23008119	542880	0.0235951	1.09745														FG	6568271	4421832	0.673211	0.519185
							0.01	30284445	1582576	0.0522571	0.740681		0.01	30284445	738666	0.0243909	1.13446														0.01	10191208	9039696	0.887009	0.684068
						n=11	CT	33226260	1664928	0.0501088	1	n=11	CT	33226260	1371150	0.0412671	1													n=11	CT	13119292	7760520	0.591535	1
							FG	27179307	972832	0.0357931	0.714308		FG	27179307	1037592	0.0381758	0.925092														FG	6550331	5893104	0.899665	1.5209
							0.01	27301069	1166704	0.0427347	0.852839		0.01	27301069	1249182	0.0457558	1.10877														0.01	7579213	9577776	1.26369	2.13629
						n=12	CT	23512164	1403344	0.0596859	1	n=12	CT	23512164	833508	0.0354501	1													n=12	CT	5054595	9431808	1.86599	1
							FG	24859550	1203120	0.0483967	0.810857		FG	24859550	951084	0.0382583	1.07922														FG	4441599	10883208	2.45029	1.31313
							0.01	17755747	823744	0.0463931	0.777288		0.01	17755747	615870	0.0346857	0.978437														0.01	4979201	5876352	1.18018	0.632469
cytoplasmic fraction
GLUT1						LDHA						cytoplasmic NFAT						Cytoplasmic NFKB
		Vinculin	GLUT1	norm	vs CT			Vinculin	LDHA	norm	vs CT			Vinculin	NFAT	norm	vs CT			Vinculin	HK1	norm	vs CT
n=1	CT	4063200	67776	0.0166804	1	n=1	CT	4063200	3210130	0.79005	1	n=1	CT	4063200	957650	0.235689	1	n=1	CT	4063200	5113680	1.25854	1
	0.01	3857760	393264	0.101941	6.11141		0.01	3857760	5199238	1.34773	1.70589		0.01	3857760	703200	0.182282	0.773402		0.01	3857760	4791462	1.24203	0.986887						relevant bands used in Fig 4I and S4K (cito NFKb and NFAT)
	FG	4080672	253776	0.0621898	3.7283		FG	4080672	4650162	1.13956	1.44239		FG	4080672	1085025	0.265894	1.12816		FG	4080672	5143684	1.2605	1.00156
	RAP	3909024	90696	0.0232017	1.39095		RAP	3909024	3204212	0.819696	1.03752		RAP	3909024	1318500	0.337296	1.43111		RAP	3909024	5627830	1.4397	1.14395
n=2	CT	3228072	145704	0.0451365	1	n=2	CT	3228072	2601764	0.805981	1	n=2	CT	3228072	1019650	0.31587	1	n=2	CT	3228072	4425226	1.37086	1
	0.01	2706696	430368	0.159001	3.52267		0.01	2706696	4659380	1.72143	2.13582		0.01	2706696	702450	0.259523	0.821614		0.01	2706696	3301610	1.21979	0.889803
	FG	2804808	280824	0.100122	2.21821		FG	2804808	3896596	1.38926	1.72368		FG	2804808	676775	0.241291	0.763894		FG	2804808	3729986	1.32985	0.97009
	RAP	2591448	63456	0.0244867	0.542503		RAP	2591448	1991352	0.768432	0.953413		RAP	2591448	761150	0.293716	0.929865		RAP	2591448	3644290	1.40628	1.02584
n=3	CT	2801040	65664	0.0234427	1	n=3	CT	2801040	2051940	0.732564	1	n=3	CT	2801040	523100	0.186752	1	n=3	CT	2801040	2308982	0.82433	1			Additional info:
	0.01	2545200	254544	0.100009	4.26612		0.01	2545200	3031336	1.191	1.6258		0.01	2545200	432500	0.169928	0.909911		0.01	2545200	1923532	0.755749	0.916804			Protein ladder: Precision Plus Protein™ Dual Color Standards (Biorad)
	FG	2313672	144240	0.0623425	2.65935		FG	2313672	2362250	1.021	1.39373		FG	2313672	371700	0.160654	0.860251		FG	2313672	1637584	0.707786	0.858619			Running buffer: MOPS
	RAP	2633808	49560	0.0188169	0.802674		RAP	2633808	997832	0.378855	0.517164		RAP	2633808	435850	0.165483	0.88611		RAP	2633808	1351246	0.513039	0.622371			Cut membrane: at 75kDa and 37kDa before incubation with primary and secondary antibodies
n=4	CT	2480712	80280	0.0323617	1	n=4	CT	2480712	1795398	0.723743	1	n=4	CT	2480712	832275	0.335498	1	n=4	CT	2480712	1560806	0.629177	1			Method od detection: ECL
	0.01	2557224	185232	0.0724348	2.23829		0.01	2557224	3640186	1.42349	1.96685		0.01	2557224	767850	0.300267	0.894988		0.01	2557224	1754662	0.686159	1.09057
n=5	CT	3628008	128112	0.0353119	1	n=5	CT	3628008	3705680	1.02141	1	n=5	CT	3628008	2677248	0.737939	1	n=5	CT	3628008	5090332	1.40307	1
	0.01	2352216	416232	0.176953	5.01114		0.01	2352216	5929858	2.52097	2.46813		0.01	2352216	1814784	0.771521	1.04551		0.01	2352216	4413708	1.8764	1.33736
	FG	2887152	390024	0.13509	3.8256		FG	2887152	5449730	1.88758	1.84802		FG	2887152	1899408	0.657883	0.891514		FG	2887152	5182866	1.79515	1.27945
	RAP	2076936	90864	0.0437491	1.23893		RAP	2076936	2731608	1.31521	1.28764		RAP	2076936	1969776	0.948405	1.28521		RAP	2076936	4292730	2.06686	1.4731
n=6	CT	2617848	164136	0.0626988	1	n=6	CT	2617848	3912018	1.49436	1	n=6	CT	2617848	2597328	0.992162	1	n=6	CT	2617848	4585230	1.75153	1
	0.01	2761008	498192	0.180438	2.87786		0.01	2761008	5633914	2.04053	1.36548		0.01	2761008	1321896	0.478773	0.482555		0.01	2761008	5038176	1.82476	1.04181
	FG	3125712	383112	0.122568	1.95487		FG	3125712	4483468	1.43438	0.959862		FG	3125712	835200	0.267203	0.269314		FG	3125712	4517916	1.4454	0.825225
	RAP	3551304	95424	0.0268701	0.428559		RAP	3551304	2998380	0.844304	0.564992		RAP	3551304	1070352	0.301397	0.303778		RAP	3551304	4826952	1.35921	0.776012
n=7	CT	3812016	115944	0.0304154	1	n=7	CT	3812016	3594030	0.942816	1	n=7	CT	3812016	1001496	0.262721	1	n=7	CT	3812016	5319366	1.39542	1
	0.01	3532968	408360	0.115586	3.80023		0.01	3532968	4971780	1.40725	1.49261		0.01	3532968	1064184	0.301215	1.14652		0.01	3532968	4355910	1.23293	0.883556
	FG	3720888	318840	0.0856892	2.8173		FG	3720888	4523904	1.21581	1.28955		FG	3720888	1486056	0.399382	1.52018		FG	3720888	4822168	1.29597	0.928732
	RAP	3380424	80832	0.0239118	0.786174		RAP	3380424	2620464	0.775188	0.822205		RAP	3380424	1501296	0.444115	1.69044		RAP	3380424	3996252	1.18217	0.847182
n=8	CT	2445936	68832	0.0281414	1	n=8	CT	2445936	2246684	0.918538	1	n=8	CT	2445936	1554144	0.635398	1	n=8	CT	2445936	2398370	0.980553	1
	0.01	1967856	257040	0.130619	4.64154		0.01	1967856	3785144	1.92349	2.09407		0.01	1967856	1525752	0.775337	1.22024		0.01	1967856	1299948	0.660591	0.673692
[truncated: 5 more columns]

## Sheet: Fig5 - Fig S1A
	NFAT cito			NFkB cito
	0.01	FG		0.01	FG
	0.773402	1.12816		0.986887	1.00156
	0.821614	0.763894		0.889803	0.97009
	0.909911	0.860251		0.916804	0.858619
	0.894988	0.891514		1.09057	1.27945
	1.04551	0.269314		1.33736	0.825225
	0.482555	1.52018		1.04181	0.928732
	1.14652			0.883556
	1.22024			0.673692
	blots and band densiometry raw values can be found in the Figure 5 - souce data

## Sheet: Fig5 - Fig S1B 
		MFI											Fold change					Tukey's multiple comparisons test
		Day 1 analysis		Day 3 analysis			Day 7 analysis							day1 analysis	day3 analysis	day7 analysis			Mean Diff.	95.00% CI of diff.	Below threshold?	Summary	Adjusted P Value
		DMSO	1%1day	DMSO	1%1day	1%3days	DMSO	1%1day	1%3days	1%7days			1% 1day	0.882097	0.865255
	a	5055	4459	2078	1798									0.80276	0.840109			day1 analysis
		6738	5409	2927	2459									0.88952	0.854317			1%1day vs. 1%3days	0
		5983	5322	2629	2246										0.822364			1%1day vs. 1%7days	0
		6218		2826	2324									0.777722	0.942308			1%3days vs. 1%7days	0
		5934	4615	2756	2597									0.734882	0.826544
		7144	5250	3142	2597													day3 analysis
														1.01332	0.885469			1%1day vs. 1%3days	-0.1634	-0.2560 to -0.07076	Yes	***	<.001
	b	4055	4109	5588	4948	5424								1.05794	1.57962			1%1day vs. 1%7days	-0.1634	-0.2560 to -0.07076	Yes	***	<.001
		3383	3579	3297	5208	4817								1.01571	0.917175			1%3days vs. 1%7days	0
		3819	3879	5409	4961	5264								1.0929	0.98921
		3789	4141	5468	5409	4044								1.02096	0.851444			day7 analysis
		3626	3702	5264	4482	5222								1.01861	0.897944			1%1day vs. 1%3days	-0.1718	-0.2773 to -0.06635	Yes	**	0.005
		4459	4542	5350	4804	4044												1%1day vs. 1%7days	-0.4963	-0.6597 to -0.3330	Yes	***	<.001
															0.991628	1.09126		1%3days vs. 1%7days	-0.3245	-0.4819 to -0.1671	Yes	**	0.001
	c			6928	6870	7326	5468	5967	7285	7534					0.964233	1.09908
				7409	7144	7971	4895	5380	6700	8955					1.04231	1.17856
				6287	6553	7429	4665	5498	5453	6719					1.04865	1.03352
				6947	7285	8803	5758	5951	6339	9214
														0.894104	0.9095	0.877366
	d	3409	3048	5558	5055	5513	3645	3198	3981	5208				0.857143	0.900161	0.978719
		4319	3702	6851	6167	7556	5028	4921	6270	7471				0.860597	0.964878	0.951085
		3515	3025	6150	5934	6909	4518	4297	5180	6428				0.863037	0.902156	1.01349
		2957	2552	7144	6445	7326	4817	4882	5498	7749
														0.886096	0.961676
	e	3740	3314	6967	6700	9161								0.789896	0.994355
		5483	4331	7971	7926	9427								0.913807	1.05266
		6033	5513	8678	9135	9956							1% 3days	0.882097
														0.80276
														0.88952
														0.777722
														0.734882
														1.01332	0.970651
														1.05794	1.46103
														1.01571	0.973193
														1.0929	0.739576
														1.02096	0.992021
														1.01861	0.755888
															1.05745	1.3323
															1.07585	1.36874
															1.18164	1.16892
															1.26717	1.1009
														0.894104	0.991904	1.09218
														0.857143	1.1029	1.24702
														0.860597	1.12341	1.14653
														0.863037	1.02548	1.14137
														0.886096	1.31491
														0.789896	1.18266
														0.913807	1.14727
													1% 7days	0.882097
														0.80276
														0.88952
														0.777722
														0.734882
														1.01332	0.970651
														1.05794	1.46103
														1.01571	0.973193
														1.0929	0.739576
														1.02096	0.992021
														1.01861	0.755888
															1.05745	1.37783
															1.07585	1.82942
															1.18164	1.4403
															1.26717	1.60021
														0.894104	0.991904	1.42881
														0.857143	1.1029	1.48588
														0.860597	1.12341	1.42275
														0.863037	1.02548	1.60868
														0.886096	1.31491
														0.789896	1.18266
														0.913807	1.14727

## Sheet: Fig5 - Fig S1C
MFI										Fold change
CD62L+		CD25+		TOX		GZMB				CD62L	CD25	TOX	GZMB
0.21	1%1day	0.21	1%1day	0.21	1%1day	0.21	1%1day			0.973386	1.18587	1.10134	1.11242
20365	19823	17173	20365	819	902	129524	144085			0.902832	1.05842	1.45169	1.07481
21890	19763	17905	18951	797	1157	150550	161812			0.884094	1.26538	1.39166	1.14794
21759	19237	15340	19411	983	1368	140958	161812			0.868606	1.25192	1.09236	1.11943
20861	18120	17224	21563	1126	1230	133228	149140			0.810525	1.30703	1.14967	1.06469
22156	17958	18503	24184	902	1037	135331	144085			0.87523	0.988169	1.37436	1.09191
16326	14289	16229	16037	585	804	177788	194129			0.916945	0.909673	1.10796	1.20311
19180	17587	15942	14502	917	1016	128313	154375			0.848069	1.19488	1.01285	1.07492
20924	17745	20736	24777	934	946	186948	200955			0.89859	1.28952	0.96368	1.19222
17020	15294	16472	21241	413	398	163856	195353
										Shapiro-Wilk test
									W	0.8843	0.8824	0.8928	0.9757
									P value	0.1742	0.1664	0.2132	0.9386
									Passed normality test (alpha=0.05)?	Yes	Yes	Yes	Yes
									P value summary	ns	ns	ns	ns
										One sample t test
									t, df	t=7.501, df=8	t=3.395, df=8	t=3.097, df=8	t=7.070, df=8
									P value (two tailed)	<0.001	0.009	0.01	<0.001
									P value summary	***	**	*	***
									Significant (alpha=0.05)?	Yes	Yes	Yes	Yes

## Sheet: Fig5 - Fig S1D
PS. Statistics at bottom
0.21
Time (min)
0	0.3976	0.3669	0.4094	0.4348	0.3561	0.3878	0.3118	0.3209	0.4396	0.2857	0.3308	0.3343	0.2861	0.339	0.3196	0.3558	0.2951	0.3166	0.4769	0.4162	0.3808	0.4997	0.4507	0.4348	0.3651	0.4363	0.3191	0.3571	0.3221	0.3289	0.4133	0.2839	0.3584	0.4488	0.4586	0.4081	0.4337	0.3946	0.4079	0.3946	0.4506	0.3951	0.3516	0.335	0.3687	0.3415	0.3177	0.2796	0.3286
0.08334	0.4024	0.371	0.4078	0.441	0.3562	0.3876	0.315	0.3214	0.4405	0.2868	0.3329	0.3383	0.2873	0.3431	0.3324	0.3576	0.2982	0.3179	0.4673	0.4337	0.3855	0.494	0.4564	0.4375	0.3702	0.4493	0.3247	0.3627	0.3314	0.3308	0.4258	0.288	0.3622	0.4507	0.4633	0.413	0.4408	0.3951	0.415	0.4097	0.4563	0.3994	0.3576	0.3363	0.3742	0.3454	0.32	0.2857	0.3245
0.166747	0.3993	0.3717	0.4001	0.4391	0.3588	0.3864	0.314	0.3193	0.4389	0.2884	0.3318	0.3382	0.2882	0.3414	0.3382	0.3554	0.2978	0.3159	0.4683	0.4336	0.3861	0.4847	0.4512	0.4336	0.3718	0.4538	0.3207	0.3603	0.3349	0.3337	0.4455	0.2869	0.3634	0.4509	0.4617	0.4172	0.4398	0.3935	0.4155	0.4113	0.4572	0.3982	0.36	0.3365	0.3695	0.3412	0.318	0.2837	0.3209
0.250197	0.5335	0.4979	0.5172	0.5647	0.4622	0.5073	0.409	0.3965	0.5211	0.3555	0.411	0.4274	0.372	0.4235	0.4071	0.4159	0.4212	0.4224	0.536	0.497	0.5153	0.5945	0.5717	0.5225	0.4854	0.5856	0.4526	0.4557	0.5102	0.5027	0.5956	0.4199	0.4987	0.5385	0.597	0.5095	0.582	0.5599	0.5588	0.5331	0.5783	0.5323	0.4915	0.4308	0.4698	0.4558	0.5154	0.4473	0.4512
0.333438	0.5358	0.496	0.5066	0.5658	0.4608	0.5079	0.4093	0.3956	0.5257	0.3557	0.4157	0.4286	0.3716	0.423	0.4024	0.4161	0.4227	0.4258	0.541	0.4975	0.5151	0.5904	0.5746	0.5132	0.4847	0.579	0.4628	0.4575	0.5176	0.5029	0.592	0.4211	0.4949	0.5395	0.608	0.5103	0.5824	0.5641	0.5596	0.5322	0.5866	0.5338	0.4925	0.4317	0.4704	0.4537	0.5176	0.4493	0.448
0.416782	0.5332	0.4928	0.4994	0.5611	0.4589	0.5069	0.4074	0.3942	0.5301	0.3505	0.4147	0.4241	0.3695	0.4181	0.4087	0.4136	0.4158	0.4228	0.5342	0.4898	0.5106	0.5855	0.5718	0.5063	0.4844	0.5902	0.455	0.4548	0.5055	0.5023	0.5815	0.4189	0.4949	0.5338	0.5977	0.5109	0.5838	0.557	0.5573	0.5333	0.5826	0.5291	0.4896	0.4273	0.4673	0.454	0.5195	0.4471	0.4448
0.500013	0.537	0.4972	0.5001	0.5775	0.4632	0.5107	0.4103	0.3975	0.5365	0.3518	0.4213	0.4281	0.3708	0.4209	0.4118	0.418	0.4199	0.4255	0.5331	0.4882	0.5102	0.5909	0.577	0.5098	0.4892	0.5887	0.4681	0.4571	0.5058	0.5022	0.5951	0.4216	0.4995	0.5374	0.6024	0.5046	0.5836	0.5605	0.5608	0.5399	0.5901	0.5335	0.4923	0.4295	0.4698	0.457	0.5225	0.4489	0.4454
0.583437	0.5349	0.4969	0.5038	0.5787	0.465	0.5041	0.4091	0.3968	0.5267	0.3517	0.4153	0.4299	0.3692	0.4222	0.3996	0.4146	0.4196	0.4296	0.5379	0.4988	0.5121	0.5902	0.5792	0.5119	0.4876	0.5882	0.4652	0.456	0.5013	0.504	0.6011	0.4211	0.4979	0.5377	0.6007	0.4888	0.5845	0.5573	0.5623	0.538	0.577	0.5332	0.4938	0.4269	0.4689	0.4616	0.521	0.4488	0.4435
0.666713	0.5344	0.4964	0.5006	0.5816	0.4637	0.506	0.4108	0.3947	0.5309	0.3524	0.4147	0.4284	0.3672	0.4185	0.3989	0.4142	0.4204	0.4266	0.5284	0.5139	0.5225	0.5864	0.5831	0.5071	0.4859	0.5786	0.4623	0.4521	0.4901	0.5015	0.5831	0.4223	0.4933	0.5358	0.6038	0.49	0.5866	0.5574	0.5594	0.5408	0.5749	0.5297	0.4947	0.4278	0.4717	0.46	0.5162	0.4472	0.4429
0.750005	0.5389	0.4996	0.5078	0.5863	0.4651	0.5066	0.4133	0.3961	0.5285	0.3528	0.4131	0.4305	0.367	0.4191	0.4058	0.4138	0.4211	0.4315	0.5294	0.5063	0.5163	0.5867	0.5816	0.5086	0.4855	0.5886	0.4801	0.4543	0.4913	0.503	0.5773	0.423	0.497	0.5377	0.6074	0.494	0.5897	0.5556	0.5618	0.5357	0.5826	0.5311	0.4931	0.4267	0.4772	0.4611	0.5178	0.4477	0.4445
0.833405	0.5377	0.4992	0.5026	0.5866	0.4676	0.5089	0.4098	0.3982	0.5285	0.3521	0.4124	0.4318	0.3663	0.4162	0.3943	0.4089	0.4234	0.4334	0.5305	0.5025	0.5146	0.587	0.5848	0.5127	0.4854	0.5755	0.4665	0.4561	0.4926	0.503	0.5765	0.4244	0.4979	0.5386	0.6086	0.5018	0.5874	0.5531	0.5617	0.5275	0.5831	0.5318	0.4959	0.4256	0.4742	0.4635	0.5199	0.4472	0.4424
0.916745	0.5375	0.4996	0.5006	0.5848	0.4667	0.5107	0.4105	0.3983	0.5171	0.3556	0.4147	0.432	0.3647	0.4164	0.3977	0.4088	0.4241	0.4314	0.5214	0.5097	0.5192	0.5878	0.59	0.5115	0.4856	0.5729	0.4655	0.452	0.4906	0.5023	0.5683	0.4236	0.4975	0.5354	0.605	0.5095	0.5877	0.5538	0.5619	0.5285	0.5808	0.5305	0.4973	0.4244	0.4741	0.4651	0.5207	0.4476	0.4405
1.00004	0.537	0.4968	0.4967	0.5834	0.4654	0.5084	0.4104	0.3983	0.5157	0.3545	0.4153	0.4307	0.3624	0.4192	0.3906	0.4116	0.4275	0.4289	0.5177	0.517	0.5218	0.5836	0.5847	0.5068	0.4838	0.5855	0.4671	0.4526	0.488	0.5001	0.575	0.4227	0.4922	0.5329	0.6038	0.4999	0.5891	0.5502	0.5608	0.528	0.5776	0.5277	0.4951	0.4211	0.4707	0.4596	0.5192	0.4475	0.438
1.08337	0.5392	0.4993	0.5008	0.5877	0.4684	0.5135	0.4132	0.3993	0.515	0.3536	0.4166	0.4336	0.3631	0.4194	0.3877	0.4113	0.4288	0.4299	0.5153	0.514	0.5209	0.5853	0.5917	0.5074	0.4869	0.5737	0.4642	0.461	0.4832	0.4996	0.5794	0.4246	0.4959	0.5298	0.6052	0.4855	0.5904	0.5546	0.5637	0.5332	0.5807	0.5311	0.4954	0.4243	0.4705	0.4617	0.5186	0.4478	0.4436
1.16668	0.5408	0.4999	0.5072	0.5831	0.4664	0.5108	0.4217	0.399	0.5039	0.353	0.4117	0.4337	0.3615	0.4151	0.3998	0.4107	0.4319	0.4307	0.5074	0.5148	0.5175	0.5883	0.592	0.5098	0.4845	0.5692	0.4615	0.4532	0.4739	0.503	0.5815	0.4229	0.4969	0.5254	0.6054	0.4812	0.5895	0.5486	0.5672	0.5382	0.578	0.5309	0.4955	0.4292	0.4692	0.4604	0.5184	0.4478	0.4434
1.25001	0.5381	0.5003	0.5062	0.5901	0.4606	0.5091	0.4223	0.3965	0.504	0.3549	0.4105	0.4342	0.3612	0.4104	0.3937	0.4127	0.4371	0.4321	0.5002	0.5197	0.5204	0.5825	0.5965	0.5089	0.486	0.5805	0.4682	0.4498	0.4693	0.4994	0.5689	0.4215	0.4992	0.5208	0.602	0.4898	0.5891	0.5483	0.5636	0.5337	0.574	0.5292	0.4958	0.4237	0.4703	0.4602	0.5148	0.4479	0.4453
1.33341	0.5413	0.5005	0.5035	0.5813	0.4592	0.5074	0.4252	0.3955	0.4983	0.3554	0.4103	0.4351	0.362	0.4101	0.3882	0.4131	0.4335	0.4633	0.4984	0.5233	0.5192	0.582	0.5895	0.5111	0.485	0.5833	0.4755	0.46	0.4712	0.5003	0.5676	0.4225	0.5014	0.5206	0.6003	0.5012	0.589	0.5457	0.5632	0.5299	0.575	0.5316	0.4957	0.424	0.4697	0.4598	0.5152	0.4448	0.4417
1.41672	0.5442	0.5045	0.5022	0.5868	0.4646	0.5121	0.4237	0.3971	0.4955	0.3651	0.4215	0.4389	0.3629	0.4102	0.3902	0.4126	0.4322	0.4848	0.5021	0.5321	0.525	0.5883	0.6015	0.5142	0.489	0.5797	0.4778	0.4604	0.4769	0.503	0.5625	0.4252	0.5042	0.5256	0.6042	0.4882	0.5965	0.5505	0.5683	0.5341	0.5773	0.5325	0.4986	0.4257	0.4726	0.4628	0.5202	0.4467	0.4434
1.50003	0.5429	0.5038	0.5026	0.5803	0.4622	0.5171	0.4312	0.3963	0.4933	0.3626	0.4242	0.4363	0.3621	0.4048	0.3917	0.4086	0.4316	0.4575	0.4998	0.5224	0.5207	0.5853	0.5914	0.5123	0.4854	0.5721	0.4796	0.4601	0.4858	0.5021	0.5561	0.4237	0.5083	0.5234	0.6026	0.4797	0.5911	0.5492	0.5678	0.5343	0.5779	0.5282	0.4987	0.4251	0.473	0.4593	0.5186	0.446	0.4424
1.58338	0.5457	0.5047	0.5014	0.5825	0.4687	0.516	0.4251	0.3952	0.4904	0.3628	0.4214	0.4376	0.3631	0.4082	0.387	0.4035	0.4299	0.4414	0.4983	0.5203	0.5192	0.5862	0.5896	0.511	0.4867	0.5762	0.4857	0.455	0.4922	0.5024	0.5583	0.424	0.5027	0.5264	0.6039	0.4854	0.5944	0.5488	0.5694	0.5336	0.5788	0.53	0.4978	0.4258	0.471	0.4555	0.5187	0.4452	0.4426
1.66671	0.5468	0.508	0.5034	0.5814	0.4706	0.5214	0.4194	0.3983	0.4912	0.3665	0.4146	0.4395	0.3652	0.4062	0.3901	0.4051	0.4331	0.4398	0.5015	0.521	0.5166	0.5886	0.5893	0.5102	0.4888	0.5677	0.4856	0.4568	0.4992	0.5028	0.5607	0.4269	0.4983	0.5251	0.6058	0.4872	0.6046	0.5499	0.5702	0.5259	0.5862	0.5314	0.5005	0.4278	0.4742	0.4591	0.518	0.4469	0.4452
1.75005	0.5451	0.504	0.5038	0.5789	0.4708	0.5215	0.421	0.3962	0.487	0.3787	0.4131	0.4359	0.3627	0.3977	0.3913	0.4071	0.4305	0.4405	0.5022	0.5183	0.5192	0.5895	0.5896	0.5064	0.4874	0.5692	0.4821	0.4548	0.4835	0.5012	0.5587	0.4286	0.4961	0.524	0.603	0.4865	0.6055	0.5474	0.5699	0.538	0.5852	0.5278	0.4979	0.4265	0.4709	0.4554	0.5195	0.4462	0.4467
1.83348	0.547	0.5044	0.5048	0.5782	0.47	0.5204	0.417	0.396	0.4845	0.3964	0.4093	0.4373	0.3624	0.407	0.3926	0.4069	0.4296	0.4506	0.5019	0.5179	0.5178	0.5921	0.5873	0.502	0.489	0.5814	0.4796	0.4518	0.4885	0.4998	0.5586	0.4261	0.4987	0.5221	0.6076	0.4814	0.6017	0.5456	0.5705	0.5347	0.5868	0.5286	0.4986	0.4256	0.4705	0.4549	0.5201	0.445	0.4456
1.91676	0.5498	0.5053	0.5059	0.5786	0.4691	0.5197	0.4144	0.3957	0.4847	0.3905	0.4106	0.4381	0.3628	0.4002	0.3958	0.4084	0.43	0.4476	0.506	0.5142	0.5189	0.5953	0.5918	0.5103	0.4904	0.5848	0.4758	0.4552	0.4882	0.5018	0.5612	0.4277	0.4989	0.5301	0.6089	0.4821	0.6029	0.5483	0.5701	0.5369	0.5902	0.529	0.4984	0.426	0.4722	0.4523	0.5198	0.4466	0.4481
2.00007	0.5517	0.5083	0.5122	0.58	0.4706	0.518	0.4139	0.3979	0.4859	0.387	0.4066	0.4386	0.365	0.4017	0.3975	0.4104	0.4292	0.4437	0.5075	0.5248	0.5246	0.5937	0.5926	0.5132	0.491	0.5824	0.4759	0.4572	0.4978	0.5088	0.5644	0.4297	0.4995	0.5262	0.6071	0.4811	0.606	0.5479	0.5725	0.5452	0.5862	0.5302	0.5006	0.4285	0.4756	0.4558	0.5206	0.448	0.4536
2.08338	0.5495	0.5077	0.5101	0.5805	0.4698	0.5178	0.4164	0.3969	0.487	0.3797	0.4067	0.4385	0.3628	0.3943	0.3982	0.4137	0.4322	0.4378	0.5071	0.5294	0.526	0.5897	0.5881	0.5084	0.4908	0.5781	0.474	0.4568	0.5083	0.5072	0.5616	0.429	0.5001	0.5238	0.6078	0.4784	0.6034	0.5461	0.5728	0.5463	0.5844	0.5298	0.5029	0.4299	0.472	0.4497	0.5185	0.4461	0.4551
2.16675	0.5529	0.5085	0.5236	0.5811	0.4732	0.5167	0.4159	0.3978	0.4884	0.3752	0.4077	0.4383	0.3662	0.3954	0.3997	0.4183	0.4322	0.4354	0.509	0.5232	0.5226	0.5845	0.5854	0.5072	0.4909	0.5792	0.4741	0.457	0.4854	0.5083	0.5591	0.4303	0.4991	0.5256	0.6082	0.4795	0.6082	0.5439	0.5723	0.5435	0.5857	0.5302	0.5024	0.4308	0.475	0.4484	0.5153	0.4459	0.4592
2.25005	0.5524	0.5086	0.5245	0.5791	0.4756	0.5165	0.4136	0.395	0.4863	0.3853	0.4068	0.4381	0.3662	0.4078	0.4028	0.4302	0.4366	0.431	0.5079	0.5184	0.518	0.5839	0.5864	0.512	0.493	0.587	0.4715	0.457	0.4861	0.5082	0.5604	0.4299	0.4967	0.5215	0.608	0.4774	0.6028	0.5447	0.5739	0.5483	0.5862	0.5311	0.501	0.4302	0.4742	0.4488	0.5131	0.4453	0.4597
2.33339	0.5538	0.5088	0.5326	0.5816	0.4743	0.5166	0.4122	0.3966	0.4872	0.3899	0.4092	0.4426	0.3675	0.4085	0.404	0.4277	0.4383	0.4332	0.5062	0.522	0.5218	0.587	0.5884	0.5114	0.4939	0.5844	0.4742	0.4583	0.4777	0.5089	0.5628	0.4317	0.4976	0.5245	0.6083	0.4755	0.6009	0.5473	0.5749	0.5536	0.5872	0.5311	0.5023	0.4309	0.4705	0.448	0.5159	0.4462	0.458
2.41668	0.5555	0.5116	0.5438	0.581	0.4757	0.5213	0.4111	0.3977	0.4875	0.3861	0.4112	0.4424	0.3676	0.4063	0.4026	0.4292	0.4409	0.4313	0.5036	0.519	0.5236	0.5899	0.5881	0.5108	0.4932	0.5832	0.4732	0.4574	0.4757	0.5093	0.5675	0.4326	0.4969	0.529	0.6074	0.4771	0.6034	0.5466	0.5762	0.5584	0.588	0.53	0.5039	0.4342	0.4736	0.4451	0.5142	0.447	0.4574
2.50004	0.5531	0.5134	0.546	0.5784	0.4738	0.5196	0.4107	0.3969	0.4868	0.3828	0.4091	0.442	0.3675	0.4079	0.401	0.431	0.4385	0.4306	0.5051	0.5223	0.526	0.5928	0.5903	0.5107	0.4923	0.58	0.4721	0.4546	0.476	0.5049	0.5789	0.4335	0.4983	0.5235	0.6058	0.4766	0.6021	0.5439	0.5769	0.5543	0.5882	0.5304	0.5026	0.4318	0.474	0.4454	0.5153	0.4479	0.4543
2.58335	0.5557	0.5128	0.5336	0.5793	0.4745	0.5194	0.4101	0.3966	0.4871	0.3795	0.4087	0.4417	0.3684	0.4046	0.4027	0.429	0.4377	0.4356	0.5087	0.5265	0.5313	0.5931	0.5912	0.5113	0.4924	0.5857	0.4774	0.4553	0.4791	0.5014	0.5757	0.4329	0.4991	0.5235	0.6054	0.475	0.603	0.5458	0.5754	0.5463	0.5855	0.5296	0.5049	0.4324	0.4786	0.4431	0.5166	0.4472	0.4534
2.66673	0.5525	0.5132	0.5267	0.5787	0.4742	0.5218	0.4068	0.3937	0.4861	0.3785	0.4089	0.4407	0.3673	0.408	0.403	0.4299	0.4361	0.437	0.5087	0.5264	0.5284	0.5918	0.5903	0.5068	0.4929	0.5832	0.4755	0.4535	0.4749	0.5014	0.5805	0.4318	0.4952	0.5196	0.6057	0.4755	0.604	0.5423	0.5732	0.5477	0.5854	0.5257	0.5025	0.4338	0.477	0.4415	0.5166	0.4454	0.4533
2.7501	0.5528	0.5135	0.5235	0.5778	0.4751	0.5229	0.4077	0.3927	0.4856	0.3873	0.4122	0.4433	0.3679	0.4062	0.4061	0.4246	0.4394	0.4359	0.5102	0.524	0.5268	0.5901	0.5905	0.5032	0.4936	0.5819	0.4722	0.4516	0.4716	0.502	0.5767	0.4328	0.4944	0.5201	0.6066	0.4769	0.6065	0.5423	0.5736	0.5439	0.5865	0.5285	0.5023	0.434	0.4778	0.4418	0.5158	0.4443	0.4538
2.83341	0.553	0.518	0.5224	0.5777	0.4772	0.5261	0.4103	0.3946	0.4864	0.405	0.4153	0.4467	0.3713	0.4095	0.41	0.4274	0.4446	0.4379	0.5095	0.5245	0.5273	0.5894	0.5917	0.5049	0.4954	0.5855	0.4712	0.4522	0.4776	0.5062	0.5658	0.4353	0.4933	0.5226	0.6092	0.476	0.6059	0.5434	0.576	0.5364	0.5891	0.5278	0.5072	0.4346	0.4798	0.4512	0.5184	0.4463	0.455
2.91671	0.5495	0.5146	0.5181	0.577	0.4696	0.5254	0.406	0.3898	0.4852	0.3931	0.412	0.4469	0.3672	0.4083	0.405	0.4241	0.4386	0.4366	0.5055	0.517	0.5246	0.5836	0.5912	0.4969	0.4955	0.5771	0.4647	0.449	0.4702	0.5013	0.5615	0.4331	0.4899	0.5177	0.6058	0.4827	0.6012	0.5396	0.5726	0.5346	0.5867	0.527	0.5025	0.4326	0.4766	0.4423	0.5165	0.4445	0.4548
3.00005	0.5479	0.5117	0.5168	0.5747	0.4675	0.5242	0.4068	0.3894	0.4878	0.3923	0.4109	0.4462	0.3671	0.3993	0.4054	0.4176	0.4412	0.435	0.5048	0.5196	0.525	0.5843	0.587	0.4968	0.4932	0.5778	0.4635	0.4508	0.4719	0.5037	0.5668	0.4321	0.4918	0.5133	0.6049	0.4824	0.5982	0.5397	0.5727	0.539	0.5859	0.5246	0.501	0.4337	0.4736	0.4455	0.5126	0.4452	0.4579
3.08335	0.5557	0.5152	0.5239	0.577	0.4743	0.5246	0.4081	0.3958	0.4952	0.39	0.4131	0.451	0.3714	0.4116	0.4129	0.4221	0.4435	0.4395	0.5127	0.5294	0.5291	0.5917	0.5904	0.5036	0.4974	0.5798	0.4658	0.4534	0.4801	0.5069	0.5761	0.436	0.4937	0.5223	0.6073	0.4806	0.608	0.544	0.5782	0.5414	0.5906	0.5292	0.504	0.4381	0.478	0.448	0.5141	0.4497	0.4595
3.16668	0.555	0.5175	0.5195	0.5788	0.4707	0.5257	0.4117	0.3947	0.4935	0.3867	0.4138	0.4513	0.372	0.4068	0.4142	0.4208	0.4463	0.4369	0.5162	0.5311	0.5321	0.5869	0.592	0.5033	0.4991	0.5874	0.465	0.4517	0.4794	0.5078	0.5757	0.4363	0.492	0.5223	0.6106	0.4817	0.6107	0.5438	0.5781	0.5404	0.5866	0.5296	0.5068	0.4384	0.478	0.4474	0.5143	0.4495	0.4612
3.25007	0.5529	0.5175	0.5193	0.576	0.4719	0.5246	0.412	0.3924	0.4935	0.3734	0.4106	0.4501	0.3705	0.4092	0.4112	0.4226	0.4475	0.4338	0.5109	0.5324	0.5338	0.5855	0.5884	0.5009	0.4971	0.5821	0.464	0.4496	0.482	0.5044	0.5698	0.4345	0.495	0.5227	0.6082	0.4822	0.6079	0.5437	0.5782	0.5464	0.5832	0.5256	0.5064	0.4373	0.4784	0.453	0.5159	0.4491	0.4595
3.33343	0.5516	0.515	0.5143	0.5749	0.4695	0.5254	0.4084	0.3926	0.4929	0.3661	0.4109	0.4467	0.3692	0.4085	0.4083	0.417	0.4543	0.4334	0.5085	0.5279	0.5284	0.5861	0.5879	0.4995	0.4952	0.5754	0.4551	0.4477	0.4762	0.5019	0.565	0.4338	0.4897	0.5167	0.6063	0.4801	0.606	0.5423	0.5757	0.5443	0.5823	0.5262	0.5023	0.4356	0.4729	0.4472	0.5138	0.446	0.4583
3.41675	0.5519	0.5181	0.5161	0.5767	0.4702	0.5284	0.4077	0.3926	0.4956	0.3779	0.4136	0.4533	0.3715	0.4026	0.4092	0.4161	0.4497	0.4332	0.5057	0.5308	0.5302	0.5866	0.5912	0.5009	0.497	0.5766	0.4678	0.45	0.4725	0.5008	0.5645	0.4352	0.4922	0.5154	0.6083	0.4828	0.6117	0.5416	0.5757	0.5353	0.5865	0.5269	0.5052	0.4367	0.4738	0.444	0.5164	0.4472	0.4603
3.50007	0.5499	0.5165	0.5179	0.578	0.4686	0.5307	0.4068	0.3915	0.4939	0.3816	0.4149	0.4511	0.3694	0.3977	0.4101	0.4136	0.4462	0.433	0.5055	0.5273	0.5305	0.5827	0.5906	0.5012	0.4951	0.5796	0.4703	0.4487	0.4722	0.502	0.5635	0.4359	0.4893	0.5138	0.6071	0.4763	0.6108	0.5429	0.5775	0.5395	0.5873	0.5256	0.5047	0.4364	0.4745	0.4414	0.5173	0.4466	0.4599
3.5834	0.5501	0.517	0.5171	0.577	0.4665	0.5333	0.4048	0.3905	0.4938	0.3891	0.4189	0.4582	0.3696	0.3941	0.4069	0.4078	0.4505	0.431	0.5031	0.526	0.5301	0.5834	0.5886	0.5004	0.4955	0.5817	0.4677	0.4457	0.4719	0.5022	0.5673	0.4369	0.4887	0.5106	0.6054	0.4729	0.61	0.5416	0.5766	0.554	0.5873	0.5249	0.5052	0.436	0.4764	0.4402	0.5147	0.4461	0.4615
3.66676	0.5566	0.523	0.5204	0.5762	0.4715	0.536	0.4094	0.3905	0.4974	0.3813	0.4232	0.4597	0.3716	0.3905	0.4121	0.4088	0.4487	0.4368	0.4998	0.5276	0.5286	0.5891	0.5959	0.5057	0.4991	0.5829	0.4675	0.448	0.4669	0.5026	0.5674	0.4396	0.4896	0.5091	0.6124	0.4724	0.6156	0.5429	0.579	0.5559	0.6001	0.5191	0.5113	0.438	0.4785	0.4432	0.5126	0.4507	0.4661
3.75009	0.5548	0.5202	0.5195	0.5737	0.4674	0.5341	0.4076	0.3907	0.4977	0.3687	0.4264	0.456	0.3696	0.3895	0.4096	0.4078	0.4447	0.4357	0.496	0.5242	0.5272	0.5871	0.5947	0.5039	0.4977	0.5808	0.4639	0.4467	0.4648	0.4992	0.5627	0.4393	0.4875	0.5076	0.6107	0.4706	0.6112	0.5427	0.5776	0.554	0.6015	0.5174	0.5089	0.436	0.474	0.44	0.5084	0.4478	0.4679
3.83335	0.5544	0.5206	0.5197	0.5774	0.4638	0.5345	0.4062	0.3894	0.4994	0.3664	0.419	0.4512	0.3691	0.3857	0.4076	0.4079	0.4465	0.4342	0.4948	0.5209	0.5309	0.5896	0.5972	0.5063	0.4988	0.5774	0.4662	0.444	0.465	0.5005	0.562	0.4396	0.486	0.506	0.611	0.4705	0.6093	0.5421	0.5742	0.5503	0.6031	0.5192	0.5097	0.4359	0.4765	0.4388	0.5096	0.4469	0.4699
3.91669	0.5581	0.5257	0.5295	0.5792	0.472	0.5271	0.4102	0.3948	0.5042	0.3725	0.4182	0.4574	0.3716	0.3887	0.4056	0.4047	0.449	0.4385	0.5041	0.5309	0.5347	0.5951	0.5989	0.5106	0.5014	0.583	0.4732	0.4485	0.4703	0.5089	0.5719	0.4422	0.4904	0.5145	0.6118	0.4754	0.6155	0.5414	0.5868	0.5565	0.6011	0.5299	0.5133	0.4356	0.4752	0.4438	0.5127	0.4495	0.4686
4.00004	0.5573	0.5269	0.5292	0.5762	0.4744	0.5197	0.4104	0.3943	0.5047	0.3679	0.4178	0.4568	0.3718	0.3907	0.4019	0.4011	0.4578	0.4368	0.5089	0.5338	0.5356	0.5989	0.597	0.5148	0.5	0.5843	0.4725	0.4473	0.47	0.5099	0.5791	0.4447	0.4894	0.5171	0.6127	0.4745	0.6164	0.5381	0.5888	0.5503	0.6006	0.5337	0.5132	0.4349	0.4735	0.4426	0.5097	0.4487	0.4686
4.08343	0.5578	0.5278	0.5297	0.5727	0.4732	0.5176	0.4105	0.3916	0.5011	0.3647	0.419	0.4586	0.3708	0.3892	0.3952	0.3987	0.4514	0.4377	0.5039	0.5341	0.5346	0.5968	0.5953	0.5107	0.5004	0.5862	0.4727	0.4461	0.4668	0.5076	0.5825	0.4455	0.4877	0.5152	0.6142	0.4739	0.6194	0.5388	0.5859	0.5415	0.6057	0.528	0.5154	0.4327	0.4704	0.4402	0.5113	0.4505	0.4683
4.16672	0.5553	0.5253	0.5263	0.5823	0.4702	0.5297	0.4122	0.3893	0.5001	0.3649	0.4181	0.4556	0.3708	0.3887	0.391	0.4032	0.4531	0.438	0.4986	0.5377	0.5351	0.5951	0.5982	0.5058	0.5007	0.5834	0.4706	0.4453	0.466	0.5058	0.575	0.4451	0.4859	0.5072	0.6152	0.4758	0.6176	0.5417	0.5809	0.5449	0.6107	0.5204	0.513	0.4347	0.4754	0.4404	0.5139	0.45	0.4666
4.2501	0.5572	0.5271	0.5259	0.5795	0.4678	0.5283	0.4121	0.3894	0.4999	0.3637	0.4203	0.4578	0.3712	0.3851	0.389	0.3981	0.4602	0.4361	0.4981	0.5375	0.5347	0.5903	0.5985	0.5063	0.499	0.5867	0.4701	0.4453	0.4618	0.5053	0.5734	0.445	0.4852	0.5054	0.6148	0.4772	0.6157	0.5404	0.581	0.548	0.6093	0.5192	0.5122	0.4348	0.4737	0.441	0.5151	0.4513	0.465
4.33339	0.5591	0.5277	0.529	0.5837	0.4709	0.533	0.4144	0.3913	0.5013	0.3634	0.4242	0.4612	0.3732	0.3889	0.3894	0.3978	0.4583	0.4398	0.4952	0.5402	0.5365	0.59	0.5982	0.5136	0.5033	0.5881	0.4716	0.4459	0.4687	0.5066	0.5801	0.4457	0.4865	0.508	0.617	0.4743	0.6195	0.544	0.5826	0.5467	0.6124	0.5205	0.5142	0.4361	0.4768	0.4442	0.5164	0.4529	0.4651
4.41675	0.5574	0.5301	0.5263	0.5803	0.4694	0.531	0.4146	0.389	0.4973	0.3623	0.4171	0.4572	0.373	0.3833	0.386	0.3967	0.4537	0.4397	0.4915	0.5379	0.5367	0.5888	0.5966	0.5155	0.5026	0.5825	0.4679	0.445	0.4655	0.5066	0.5772	0.4444	0.4867	0.5064	0.6144	0.476	0.6176	0.5428	0.5837	0.5469	0.6119	0.5207	0.5142	0.435	0.4767	0.446	0.518	0.4529	0.4643
4.50007	0.5558	0.5348	0.5303	0.5817	0.4702	0.5334	0.4167	0.3896	0.4968	0.3619	0.4199	0.4545	0.3729	0.3806	0.3888	0.3982	0.4495	0.44	0.4931	0.5388	0.5387	0.5866	0.6006	0.5145	0.503	0.5812	0.4621	0.4451	0.4748	0.5044	0.5785	0.4455	0.488	0.5065	0.6163	0.4761	0.6168	0.5428	0.5839	0.5496	0.608	0.5221	0.5155	0.437	0.4809	0.4431	0.516	0.4509	0.4654
4.58337	0.5581	0.5357	0.5302	0.5842	0.4711	0.5322	0.4176	0.391	0.4958	0.3643	0.4244	0.454	0.3734	0.3806	0.3897	0.3996	0.4503	0.4414	0.5014	0.5398	0.5379	0.5882	0.601	0.5195	0.5034	0.5844	0.4644	0.4464	0.4667	0.5057	0.578	0.4484	0.4881	0.5061	0.6156	0.4762	0.6184	0.5432	0.5827	0.5454	0.607	0.5201	0.5148	0.4378	0.4825	0.4432	0.5144	0.4512	0.465
4.66676	0.5587	0.5356	0.5321	0.5871	0.4755	0.5333	0.4189	0.3919	0.4966	0.3704	0.4242	0.4551	0.3735	0.3823	0.3944	0.4001	0.4503	0.4408	0.5049	0.5384	0.5373	0.5888	0.6011	0.5243	0.5035	0.5807	0.4647	0.4474	0.4685	0.5062	0.5708	0.4501	0.4886	0.5061	0.6175	0.4732	0.6193	0.544	0.586	0.5414	0.6082	0.5251	0.5177	0.438	0.4834	0.4414	0.5146	0.4524	0.4673
4.75009	0.5593	0.5341	0.5358	0.5838	0.4793	0.534	0.4237	0.3918	0.4955	0.3695	0.4287	0.4562	0.3737	0.3837	0.3979	0.3996	0.4481	0.4378	0.5087	0.5356	0.5485	0.5906	0.6011	0.5255	0.5027	0.5796	0.4639	0.4455	0.4656	0.5052	0.5716	0.4481	0.4921	0.5074	0.6204	0.474	0.6168	0.5441	0.5872	0.5392	0.6076	0.5235	0.5185	0.4392	0.4808	0.4451	0.5143	0.4529	0.4657
4.83338	0.5579	0.5298	0.533	0.5793	0.4755	0.5344	0.4177	0.388	0.4928	0.3665	0.4233	0.4549	0.3714	0.3824	0.3911	0.3978	0.4488	0.4353	0.5073	0.53	0.5378	0.5866	0.5965	0.5184	0.5017	0.5735	0.463	0.445	0.4657	0.5017	0.5693	0.4454	0.487	0.5049	0.6181	0.4709	0.6113	0.5409	0.5824	0.5341	0.6017	0.5211	0.5137	0.435	0.4802	0.4432	0.5114	0.4507	0.4613
4.91674	0.5557	0.5297	0.5337	0.581	0.4729	0.5372	0.4171	0.3908	0.4914	0.3667	0.4255	0.4576	0.3708	0.3822	0.3875	0.398	0.4477	0.434	0.5068	0.5267	0.5351	0.5827	0.5974	0.5171	0.501	0.5792	0.4651	0.4454	0.4646	0.5038	0.5727	0.4465	0.4866	0.5058	0.6172	0.4705	0.6109	0.5428	0.5808	0.5329	0.6023	0.5204	0.5142	0.4361	0.4783	0.4449	0.5107	0.4499	0.459
5.00007	0.5635	0.5313	0.5409	0.58	0.4772	0.5327	0.4194	0.3917	0.4918	0.3696	0.4243	0.4609	0.3723	0.3906	0.3893	0.3986	0.4497	0.436	0.5088	0.529	0.5334	0.5839	0.597	0.527	0.5039	0.5773	0.4706	0.4487	0.4704	0.5055	0.5768	0.4507	0.4888	0.5077	0.6217	0.4709	0.6131	0.5425	0.5885	0.5406	0.6047	0.521	0.516	0.4373	0.4802	0.4465	0.5126	0.4536	0.4615
5.08338	0.5592	0.5337	0.5375	0.5811	0.4759	0.5321	0.4185	0.3892	0.4914	0.3691	0.422	0.4592	0.3705	0.3922	0.3951	0.4012	0.4504	0.4361	0.5055	0.5299	0.5357	0.5845	0.5983	0.5231	0.5031	0.5774	0.466	0.4467	0.4663	0.5057	0.5766	0.4496	0.488	0.508	0.6186	0.4741	0.6195	0.5425	0.5857	0.5361	0.6033	0.522	0.517	0.4387	0.4809	0.4431	0.5142	0.4536	0.4598
5.16673	0.5584	0.5379	0.5382	0.5851	0.4768	0.5333	0.4211	0.3905	0.4909	0.3765	0.4227	0.4616	0.3721	0.3956	0.4014	0.4032	0.4516	0.441	0.5042	0.5317	0.5353	0.5894	0.601	0.5187	0.5063	0.579	0.467	0.4484	0.4668	0.5088	0.58	0.4517	0.4891	0.5105	0.6207	0.4803	0.6236	0.5437	0.5884	0.5372	0.605	0.5267	0.5206	0.4396	0.4825	0.4454	0.5172	0.4553	0.4643
5.25011	0.5597	0.5365	0.5384	0.5827	0.4772	0.5297	0.4163	0.3905	0.4909	0.3747	0.4204	0.4612	0.372	0.4016	0.4006	0.4029	0.4524	0.4387	0.5001	0.5306	0.5316	0.5881	0.5999	0.5186	0.5056	0.5788	0.4645	0.4469	0.4647	0.507	0.577	0.451	0.4876	0.5094	0.6216	0.4802	0.6222	0.5464	0.5885	0.5406	0.6078	0.5261	0.5186	0.4404	0.4819	0.4471	0.5151	0.4553	0.4606
5.33333	0.5598	0.5356	0.5378	0.5839	0.476	0.5327	0.4196	0.3889	0.4952	0.3699	0.4177	0.4625	0.3721	0.4012	0.402	0.4004	0.4567	0.4393	0.498	0.5304	0.5334	0.585	0.5988	0.5192	0.5068	0.585	0.4672	0.447	0.4642	0.5067	0.5786	0.4511	0.4899	0.508	0.6208	0.4835	0.6242	0.5423	0.5901	0.5525	0.6097	0.5248	0.5188	0.4404	0.4818	0.4469	0.5146	0.4552	0.4602
5.41673	0.5634	0.5369	0.5418	0.582	0.4809	0.5341	0.4182	0.3907	0.4967	0.3693	0.4175	0.4647	0.3749	0.4043	0.395	0.4009	0.4595	0.4383	0.4995	0.5341	0.5316	0.5856	0.601	0.5226	0.5096	0.5888	0.466	0.4487	0.4649	0.5092	0.5801	0.453	0.487	0.5137	0.6225	0.4883	0.6296	0.5428	0.5915	0.5553	0.6093	0.5266	0.5202	0.4415	0.4802	0.4513	0.5148	0.4555	0.4593
5.50007	0.5638	0.5351	0.5379	0.5786	0.4752	0.5323	0.4182	0.3868	0.4951	0.3769	0.4169	0.4616	0.3732	0.407	0.3932	0.3999	0.4594	0.4381	0.4959	0.53	0.5292	0.5851	0.5992	0.519	0.5065	0.5875	0.4628	0.4475	0.4648	0.5104	0.5818	0.4518	0.4845	0.5109	0.6209	0.4936	0.6276	0.5426	0.5879	0.5503	0.6083	0.5249	0.5187	0.4386	0.4787	0.4509	0.5164	0.4543	0.4555
5.58337	0.5644	0.5374	0.5375	0.5811	0.4771	0.5317	0.4197	0.3906	0.4971	0.3791	0.4191	0.4645	0.3732	0.4122	0.3958	0.4035	0.4649	0.4383	0.4948	0.533	0.5324	0.5861	0.6014	0.5189	0.5079	0.5858	0.4666	0.4489	0.4645	0.5103	0.5806	0.453	0.4863	0.512	0.6224	0.4998	0.631	0.542	0.5909	0.5587	0.6074	0.526	0.5207	0.4409	0.4799	0.4525	0.5193	0.4532	0.4597
5.66672	0.5627	0.539	0.5353	0.5795	0.4782	0.5324	0.4192	0.3891	0.499	0.3812	0.4182	0.464	0.3725	0.4198	0.4001	0.4087	0.4631	0.4365	0.4917	0.5298	0.5317	0.5828	0.6009	0.5146	0.5067	0.5833	0.4639	0.4475	0.4661	0.5094	0.5793	0.4526	0.4864	0.5065	0.6201	0.4993	0.6287	0.5398	0.5891	0.553	0.6039	0.5236	0.5188	0.4383	0.4792	0.4509	0.5203	0.4549	0.4602
5.75004	0.5752	0.5459	0.5428	0.5753	0.4854	0.5296	0.416	0.3914	0.5029	0.3977	0.4162	0.4684	0.3754	0.433	0.4185	0.4118	0.4664	0.441	0.4927	0.5315	0.522	0.5891	0.6038	0.5214	0.5092	0.5849	0.4711	0.4493	0.4705	0.5144	0.5874	0.4569	0.4882	0.5122	0.6318	0.496	0.6412	0.5426	0.5943	0.5461	0.6155	0.5212	0.5243	0.4406	0.4796	0.4564	0.5196	0.4598	0.4621
5.83332	0.5677	0.5444	0.5375	0.5819	0.4811	0.5357	0.4187	0.3942	0.4995	0.4034	0.4205	0.4663	0.3762	0.4354	0.4204	0.4217	0.4602	0.44	0.4909	0.5295	0.5317	0.5845	0.6055	0.5167	0.5111	0.5856	0.4696	0.4512	0.4715	0.5264	0.5806	0.4569	0.4896	0.5088	0.6262	0.5034	0.6373	0.545	0.5937	0.5579	0.6153	0.5238	0.5247	0.4447	0.4812	0.4584	0.5166	0.4594	0.4644
5.91672	0.5702	0.5481	0.5448	0.5788	0.48	0.5328	0.4171	0.3945	0.5015	0.4001	0.4228	0.4643	0.3753	0.4423	0.4198	0.4248	0.466	0.4402	0.49	0.5313	0.5298	0.5869	0.6057	0.516	0.5109	0.5872	0.469	0.4513	0.473	0.5597	0.586	0.4558	0.4899	0.5105	0.6271	0.5057	0.6382	0.5463	0.5941	0.5575	0.613	0.5242	0.5253	0.4436	0.4849	0.4579	0.5167	0.4616	0.4622
6.00013	0.5654	0.5486	0.5954	0.584	0.4782	0.5363	0.4168	0.3953	0.4995	0.394	0.4236	0.4619	0.3737	0.4542	0.4221	0.428	0.4625	0.4396	0.491	0.5331	0.5328	0.5856	0.6044	0.5137	0.5098	0.5862	0.4649	0.4493	0.4718	0.5783	0.5966	0.4539	0.4889	0.5049	0.6307	0.5043	0.6329	0.5451	0.5928	0.5701	0.6101	0.5225	0.5249	0.4433	0.489	0.4596	0.5167	0.4582	0.4632
6.08342	0.5649	0.5431	0.5881	0.5776	0.4777	0.5349	0.4131	0.4062	0.4954	0.3961	0.4284	0.4612	0.3724	0.4722	0.4216	0.427	0.4625	0.4398	0.4888	0.5297	0.5284	0.5854	0.5999	0.5155	0.507	0.584	0.4639	0.4478	0.4738	0.5607	0.6022	0.4528	0.483	0.5057	0.6373	0.5038	0.6305	0.5412	0.5914	0.5667	0.6091	0.5206	0.5235	0.4414	0.4887	0.4583	0.5155	0.456	0.4613
6.16673	0.5674	0.5483	0.5855	0.5834	0.4858	0.5481	0.4233	0.4515	0.4991	0.4165	0.4481	0.467	0.3769	0.4729	0.4264	0.4378	0.4691	0.4426	0.4913	0.5334	0.5338	0.5907	0.6078	0.5288	0.5118	0.5892	0.4671	0.4511	0.4731	0.6053	0.6212	0.4541	0.4867	0.5121	0.6582	0.5098	0.6343	0.5437	0.5969	0.5721	0.6147	0.5231	0.5256	0.4422	0.4928	0.4632	0.5189	0.461	0.4656
6.25008	0.5671	0.5441	0.5834	0.5842	0.488	0.5643	0.4299	0.4749	0.5002	0.4283	0.4735	0.4671	0.3758	0.4773	0.4298	0.446	0.467	0.4518	0.4927	0.5335	0.5349	0.589	0.6089	0.5279	0.5128	0.591	0.4671	0.452	0.4762	0.591	0.6264	0.4538	0.4881	0.5107	0.6516	0.5088	0.6349	0.543	0.5957	0.5776	0.6156	0.5249	0.5273	0.4443	0.4944	0.468	0.5199	0.4603	0.4632
6.33332	0.5651	0.5468	0.6001	0.5819	0.4911	0.5652	0.464	0.4939	0.4986	0.4338	0.4607	0.4672	0.3757	0.4843	0.4396	0.473	0.4733	0.4836	0.489	0.532	0.5435	0.5878	0.6087	0.5281	0.5104	0.5953	0.4658	0.4495	0.4705	0.6099	0.6268	0.4516	0.4861	0.5125	0.6675	0.5052	0.6339	0.5454	0.5955	0.5748	0.6144	0.5212	0.5248	0.4461	0.4928	0.4852	0.5186	0.4603	0.4646
6.41678	0.5615	0.5444	0.5951	0.5895	0.4957	0.5828	0.4628	0.5099	0.4979	0.4416	0.4686	0.466	0.3751	0.4818	0.4526	0.5167	0.4769	0.5325	0.4924	0.5353	0.5591	0.5862	0.6148	0.5295	0.5108	0.5943	0.4671	0.4578	0.4727	0.6089	0.6275	0.4533	0.4862	0.5135	0.6687	0.5064	0.6328	0.5463	0.5923	0.583	0.6108	0.5219	0.5242	0.455	0.4943	0.5218	0.5203	0.463	0.4674
6.50005	0.5642	0.5462	0.5996	0.6007	0.518	0.5859	0.4678	0.5189	0.5005	0.4531	0.4969	0.4707	0.377	0.4724	0.451	0.5095	0.4829	0.5388	0.4949	0.5409	0.5641	0.5881	0.6137	0.5322	0.5124	0.5962	0.4696	0.46	0.4702	0.6141	0.6312	0.4637	0.488	0.527	0.6762	0.5058	0.6399	0.548	0.5952	0.5851	0.6135	0.5233	0.5265	0.5192	0.4968	0.5204	0.5242	0.4673	0.4696
6.58334	0.5632	0.5451	0.5965	0.6028	0.5629	0.5999	0.4748	0.5159	0.5003	0.4707	0.5006	0.4721	0.3783	0.4604	0.4423	0.4928	0.4839	0.5462	0.4946	0.5408	0.5655	0.59	0.6285	0.5343	0.5105	0.5928	0.472	0.4727	0.4722	0.6193	0.6252	0.4823	0.4885	0.538	0.6872	0.5039	0.6399	0.5473	0.5971	0.5876	0.6136	0.5222	0.5248	0.4998	0.4963	0.5242	0.5209	0.5206	0.4727
6.66675	0.5587	0.5482	0.5912	0.6379	0.5671	0.6141	0.4817	0.513	0.5006	0.4675	0.5074	0.47	0.3814	0.4477	0.4368	0.4834	0.4945	0.5517	0.4937	0.5412	0.5769	0.5915	0.6402	0.5366	0.513	0.5906	0.4681	0.5118	0.4688	0.6146	0.6257	0.4856	0.4887	0.5483	0.6924	0.506	0.6368	0.5462	0.5967	0.5897	0.6127	0.5225	0.5276	0.5077	0.4977	0.5217	0.5226	0.524	0.475
6.75002	0.563	0.5472	0.5913	0.649	0.5794	0.6162	0.4729	0.5105	0.5026	0.4686	0.5005	0.4753	0.3837	0.4458	0.4259	0.4636	0.4987	0.557	0.4952	0.541	0.5725	0.5892	0.6367	0.5428	0.5125	0.5894	0.4693	0.5093	0.4725	0.6174	0.64	0.4825	0.4901	0.5623	0.7051	0.5021	0.6387	0.549	0.5996	0.5868	0.6176	0.5246	0.5288	0.5043	0.499	0.5244	0.5196	0.5342	0.4739
6.83336	0.5635	0.5497	0.584	0.6501	0.5797	0.6165	0.4723	0.5041	0.5047	0.4711	0.4979	0.4784	0.3842	0.4416	0.4158	0.4513	0.5018	0.5633	0.5001	0.5427	0.573	0.5921	0.6402	0.5475	0.5147	0.5906	0.4704	0.5231	0.4724	0.6181	0.65	0.4862	0.492	0.5625	0.7028	0.5027	0.6387	0.5501	0.6015	0.587	0.6221	0.5292	0.5363	0.5231	0.5188	0.5278	0.5178	0.5347	0.482
6.91673	0.5622	0.5483	0.5794	0.6562	0.573	0.6116	0.464	0.4898	0.5058	0.4689	0.4882	0.4789	0.383	0.4362	0.4084	0.4365	0.5089	0.5623	0.4986	0.5394	0.5693	0.5895	0.6559	0.5461	0.5138	0.5873	0.467	0.5284	0.4711	0.617	0.6497	0.4869	0.4907	0.5611	0.6946	0.4988	0.6378	0.5489	0.6048	0.5844	0.6201	0.533	0.5519	0.5242	0.5502	0.5286	0.521	0.5388	0.5194
7.00007	0.5611	0.5498	0.572	0.6625	0.5609	0.6193	0.4601	0.4767	0.5054	0.4695	0.4853	0.478	0.3892	0.4348	0.4068	0.4315	0.5207	0.5669	0.5028	0.5433	0.5768	0.5912	0.6738	0.5437	0.5177	0.5879	0.4693	0.532	0.4749	0.6189	0.6511	0.4879	0.4932	0.5579	0.6884	0.5016	0.6343	0.5527	0.606	0.5874	0.6204	0.5393	0.555	0.5222	0.565	0.5316	0.5255	0.5417	0.5878
7.08335	0.5585	0.5574	0.571	0.6544	0.5503	0.6153	0.4484	0.4569	0.503	0.4624	0.4753	0.4769	0.3871	0.4335	0.4027	0.4253	0.5234	0.5648	0.5033	0.5411	0.5714	0.5893	0.6733	0.5423	0.5197	0.5835	0.4689	0.5282	0.4767	0.618	0.6475	0.491	0.4913	0.5502	0.6812	0.4969	0.6379	0.549	0.6098	0.5828	0.6173	0.5444	0.5473	0.5173	0.5522	0.5276	0.5333	0.5365	0.5664
7.16671	0.5627	0.5814	0.5707	0.648	0.5431	0.6172	0.4456	0.4502	0.5058	0.4605	0.4698	0.4829	0.3934	0.4393	0.4032	0.4268	0.5327	0.5703	0.506	0.5443	0.5747	0.5901	0.6799	0.5456	0.5364	0.5842	0.4698	0.5287	0.4821	0.6202	0.6531	0.4956	0.4924	0.547	0.6776	0.4982	0.6409	0.5578	0.6106	0.5803	0.6193	0.5492	0.5515	0.5153	0.5621	0.5289	0.5897	0.536	0.6011
7.25006	0.5575	0.5842	0.5626	0.6329	0.529	0.6114	0.438	0.4372	0.5	0.4493	0.4599	0.4817	0.3898	0.4369	0.3994	0.4222	0.5266	0.5661	0.5057	0.5393	0.5671	0.5863	0.6578	0.5397	0.5486	0.5789	0.4674	0.5194	0.4764	0.6119	0.6497	0.4942	0.4937	0.5322	0.6639	0.4935	0.6344	0.5691	0.6045	0.5732	0.6134	0.5495	0.5504	0.5026	0.5352	0.5237	0.593	0.5281	0.5743
7.3334	0.5598	0.5928	0.5572	0.6271	0.5207	0.619	0.434	0.433	0.5012	0.4466	0.4582	0.4846	0.4005	0.4382	0.4004	0.4242	0.5311	0.5696	0.5093	0.5422	0.5708	0.5862	0.6671	0.5414	0.5507	0.5796	0.4698	0.5182	0.4816	0.6088	0.6469	0.4996	0.4971	0.5279	0.6586	0.4915	0.632	0.582	0.611	0.5742	0.6158	0.5492	0.5496	0.4991	0.5482	0.5233	0.5839	0.5251	0.5956
7.41675	0.556	0.5925	0.5549	0.6146	0.5145	0.6131	0.4298	0.4274	0.4989	0.4334	0.4563	0.485	0.401	0.4376	0.3992	0.4227	0.5313	0.568	0.51	0.539	0.5695	0.5869	0.6714	0.5367	0.5525	0.5771	0.4679	0.5079	0.4806	0.6024	0.6467	0.4973	0.4925	0.5204	0.6535	0.4916	0.6302	0.5838	0.6101	0.5716	0.6137	0.5494	0.5465	0.4892	0.5407	0.5095	0.6002	0.5164	0.5905
7.50007	0.5572	0.5998	0.5571	0.6041	0.5145	0.6134	0.4301	0.4278	0.4991	0.4289	0.4582	0.4876	0.4089	0.4382	0.4021	0.4216	0.5345	0.5709	0.5111	0.5421	0.5705	0.5877	0.6744	0.5362	0.5633	0.5782	0.4699	0.4994	0.4814	0.5968	0.6463	0.4987	0.5012	0.5182	0.6524	0.49	0.6311	0.5791	0.6131	0.5716	0.6164	0.5496	0.5464	0.4801	0.5303	0.5012	0.6052	0.509	0.591
7.58346	0.5535	0.5972	0.5568	0.5953	0.5093	0.6069	0.4296	0.4269	0.4974	0.4238	0.4561	0.4845	0.433	0.436	0.4017	0.4198	0.5331	0.5671	0.5084	0.5362	0.5657	0.5879	0.6731	0.5343	0.5612	0.5718	0.4665	0.4878	0.479	0.5899	0.6421	0.4996	0.5155	0.5152	0.6514	0.4853	0.6276	0.5867	0.6125	0.5684	0.611	0.5509	0.5416	0.4717	0.5227	0.495	0.62	0.5006	0.5827
7.66679	0.5553	0.6031	0.5619	0.5908	0.5099	0.6092	0.4329	0.4326	0.4997	0.4218	0.4638	0.4853	0.4448	0.4376	0.4059	0.4219	0.5355	0.5729	0.5122	0.5378	0.5688	0.5885	0.6657	0.5341	0.5607	0.5719	0.4709	0.4771	0.482	0.5887	0.6442	0.4998	0.545	0.5138	0.6549	0.4853	0.6263	0.5829	0.6118	0.5684	0.6151	0.5524	0.543	0.4694	0.512	0.5002	0.631	0.499	0.586
7.75004	0.5568	0.6035	0.5685	0.5808	0.504	0.6026	0.4284	0.4333	0.4977	0.4161	0.4581	0.4874	0.4507	0.4404	0.4046	0.4204	0.5362	0.5728	0.5135	0.5376	0.5617	0.594	0.6683	0.5349	0.5553	0.572	0.4706	0.4671	0.4852	0.59	0.6473	0.499	0.5461	0.5112	0.653	0.4812	0.6295	0.5871	0.6127	0.5682	0.6167	0.555	0.537	0.464	0.5003	0.5046	0.6368	0.4959	0.5777
7.83338	0.5533	0.6075	0.5652	0.5823	0.4983	0.6051	0.4279	0.4342	0.4983	0.4115	0.4614	0.4846	0.4502	0.4417	0.408	0.4247	0.5353	0.5721	0.5133	0.5368	0.5668	0.5948	0.666	0.5317	0.555	0.5692	0.469	0.4637	0.4948	0.5843	0.6414	0.5012	0.5803	0.5069	0.6521	0.4816	0.623	0.5951	0.6099	0.5667	0.6106	0.5603	0.5376	0.464	0.5003	0.504	0.6431	0.4961	0.5721
7.91667	0.5532	0.6116	0.5661	0.584	0.4991	0.6075	0.4289	0.4365	0.5011	0.4073	0.4602	0.4851	0.44	0.4412	0.4092	0.4245	0.5349	0.5711	0.515	0.5374	0.5696	0.5964	0.6595	0.53	0.5519	0.5707	0.4664	0.4645	0.5283	0.5831	0.6383	0.4988	0.5715	0.5061	0.6537	0.4824	0.6254	0.5977	0.6078	0.5679	0.6102	0.5645	0.5364	0.4646	0.4971	0.5088	0.6447	0.4951	0.5598
8.00009	0.5488	0.61	0.5639	0.5791	0.4956	0.6031	0.4259	0.434	0.4973	0.3997	0.4584	0.4798	0.4428	0.4404	0.406	0.4223	0.5307	0.5681	0.5128	0.533	0.5657	0.5945	0.666	0.5263	0.5463	0.5666	0.4638	0.4621	0.5484	0.5749	0.6334	0.4949	0.5493	0.5025	0.6563	0.4774	0.6183	0.594	0.6023	0.564	0.6054	0.5633	0.5316	0.4621	0.4911	0.5104	0.65	0.4925	0.5419
8.0834	0.5523	0.6157	0.5702	0.5859	0.4963	0.6078	0.4282	0.4386	0.501	0.3983	0.4629	0.481	0.44	0.4439	0.409	0.4233	0.531	0.5705	0.5166	0.5369	0.5689	0.5989	0.667	0.5294	0.5471	0.5705	0.4687	0.4674	0.5243	0.5652	0.6334	0.497	0.5628	0.5043	0.6646	0.4801	0.6202	0.5947	0.602	0.5687	0.6076	0.57	0.5335	0.4648	0.4928	0.518	0.6453	0.4961	0.5297
8.16667	0.5503	0.6127	0.5744	0.5886	0.4962	0.6043	0.4304	0.4353	0.5009	0.3989	0.4671	0.4792	0.4317	0.4449	0.4065	0.4242	0.5274	0.5697	0.5169	0.5387	0.5716	0.5955	0.6648	0.5256	0.5445	0.5671	0.467	0.4656	0.5088	0.5549	0.6304	0.4988	0.5846	0.5034	0.6566	0.4781	0.6168	0.5932	0.6009	0.5696	0.6061	0.5748	0.5329	0.4648	0.4938	0.5178	0.6545	0.4948	0.5242
8.25	0.5518	0.6149	0.5787	0.5926	0.5002	0.6001	0.4274	0.4355	0.5004	0.399	0.4661	0.4802	0.4274	0.4514	0.4062	0.4313	0.5266	0.5682	0.5179	0.5388	0.5719	0.5952	0.6652	0.5286	0.5449	0.5712	0.4713	0.4671	0.5235	0.5487	0.6276	0.4983	0.5734	0.5038	0.6538	0.4804	0.6176	0.588	0.5993	0.5673	0.6061	0.5813	0.5334	0.4688	0.4969	0.5242	0.652	0.4974	0.515
8.3334	0.5504	0.6114	0.5791	0.5883	0.4963	0.5898	0.4278	0.4432	0.4976	0.3986	0.4659	0.4789	0.4199	0.4558	0.4037	0.4287	0.522	0.5653	0.517	0.5372	0.5682	0.5963	0.6603	0.5275	0.5409	0.5691	0.4708	0.4676	0.5242	0.5457	0.6264	0.4958	0.5631	0.5032	0.6593	0.4789	0.614	0.5804	0.5994	0.5631	0.6043	0.5852	0.53	0.4706	0.4958	0.5234	0.6545	0.4956	0.5156
8.41675	0.5504	0.6127	0.5781	0.5912	0.4957	0.5925	0.4286	0.457	0.4986	0.4017	0.467	0.4788	0.4137	0.456	0.4039	0.4299	0.5229	0.5683	0.5169	0.5359	0.5679	0.5947	0.6547	0.5271	0.5421	0.566	0.4714	0.4688	0.5364	0.5469	0.6223	0.4976	0.5614	0.5038	0.6685	0.4788	0.6127	0.5733	0.5962	0.5652	0.6068	0.5903	0.5288	0.4749	0.4997	0.5243	0.6643	0.4984	0.5181
8.5001	0.5501	0.6102	0.5791	0.595	0.4999	0.594	0.4277	0.4583	0.4975	0.4053	0.4701	0.4789	0.4088	0.4574	0.4051	0.431	0.5207	0.568	0.5169	0.5372	0.5727	0.5979	0.6559	0.527	0.5435	0.5656	0.4712	0.4708	0.5431	0.5431	0.6191	0.4985	0.5546	0.5008	0.6727	0.4808	0.6101	0.5672	0.5958	0.5667	0.6076	0.595	0.5321	0.4791	0.501	0.5231	0.6655	0.5033	0.5183
8.58343	0.5513	0.6116	0.5784	0.5928	0.4967	0.5921	0.425	0.4616	0.5006	0.4031	0.4687	0.4795	0.4069	0.4556	0.4054	0.428	0.5225	0.566	0.5172	0.5378	0.5708	0.6022	0.6538	0.5263	0.545	0.5686	0.4742	0.4714	0.5361	0.5441	0.6178	0.4985	0.5467	0.5024	0.6749	0.4799	0.609	0.5639	0.597	0.5653	0.6098	0.5961	0.5323	0.4783	0.5023	0.5224	0.6684	0.504	0.523
8.66668	0.5526	0.6107	0.5819	0.5944	0.4989	0.5916	0.4264	0.4633	0.5048	0.4066	0.4667	0.4815	0.4053	0.4601	0.4073	0.4314	0.5239	0.5686	0.5173	0.5413	0.5716	0.6069	0.6528	0.5286	0.5466	0.5717	0.4755	0.4746	0.5485	0.5457	0.6164	0.4997	0.5448	0.5039	0.6845	0.4808	0.6132	0.5632	0.5971	0.5672	0.6108	0.6016	0.5323	0.4823	0.504	0.5218	0.6733	0.5069	0.5269
8.75005	0.5537	0.6142	0.5913	0.5969	0.4997	0.5975	0.4278	0.4624	0.5059	0.4068	0.4682	0.4832	0.4024	0.4593	0.4085	0.4314	0.5253	0.5722	0.517	0.5423	0.572	0.6096	0.6501	0.5312	0.5491	0.5745	0.4756	0.4754	0.5473	0.5494	0.6179	0.501	0.554	0.5039	0.6975	0.4819	0.6152	0.5652	0.5996	0.5672	0.6139	0.6034	0.5355	0.4839	0.5051	0.5228	0.6747	0.5048	0.5347
8.83341	0.5515	0.6113	0.5901	0.6001	0.4982	0.5968	0.4251	0.4566	0.5073	0.4046	0.4694	0.4793	0.4019	0.4544	0.4092	0.4333	0.5241	0.5731	0.5153	0.5423	0.573	0.6125	0.6493	0.5268	0.546	0.5736	0.4738	0.4757	0.5369	0.5525	0.612	0.5029	0.549	0.5016	0.6986	0.4813	0.6133	0.5602	0.5999	0.5699	0.612	0.6049	0.5348	0.4881	0.505	0.5209	0.6785	0.5084	0.5372
8.91674	0.5504	0.6124	0.5888	0.5975	0.4997	0.5927	0.4267	0.454	0.5086	0.4072	0.4663	0.4782	0.402	0.4509	0.4083	0.43	0.5244	0.5777	0.5156	0.5406	0.5737	0.6145	0.6479	0.5247	0.5474	0.5763	0.472	0.4737	0.5467	0.5517	0.6086	0.5011	0.5507	0.5001	0.6943	0.4824	0.6103	0.5656	0.5993	0.5692	0.6087	0.6036	0.5364	0.4895	0.5049	0.5185	0.6832	0.5082	0.5404
9.00005	0.5487	0.6064	0.5839	0.5979	0.4955	0.5939	0.4246	0.45	0.506	0.4088	0.4648	0.4785	0.4028	0.448	0.4062	0.4298	0.5211	0.5773	0.5105	0.5381	0.57	0.6126	0.6457	0.5195	0.5432	0.5758	0.469	0.4736	0.5531	0.549	0.6028	0.4974	0.5523	0.5007	0.6908	0.4809	0.61	0.561	0.5965	0.5664	0.6058	0.602	0.5311	0.4894	0.5043	0.5156	0.6812	0.5074	0.5402
9.0834	0.5512	0.6082	0.5874	0.5987	0.4964	0.5951	0.4249	0.4503	0.508	0.4119	0.47	0.4803	0.4065	0.4479	0.4122	0.437	0.5255	0.5802	0.5122	0.5359	0.5688	0.6184	0.645	0.5212	0.5475	0.5822	0.4697	0.4757	0.5525	0.5501	0.6027	0.5021	0.5561	0.5021	0.6898	0.4807	0.6102	0.5633	0.6005	0.5681	0.6091	0.6039	0.5344	0.4968	0.5079	0.5158	0.683	0.5134	0.5454
9.16674	0.5491	0.6032	0.5831	0.5967	0.4961	0.5925	0.4239	0.4456	0.5047	0.4117	0.4706	0.4784	0.4065	0.4472	0.4121	0.4382	0.5221	0.5793	0.5076	0.5333	0.5665	0.6142	0.6405	0.5165	0.5435	0.5775	0.4677	0.4746	0.5481	0.5458	0.5968	0.4996	0.5572	0.5	0.6834	0.4783	0.6093	0.5587	0.5972	0.5691	0.608	0.6009	0.5321	0.4988	0.5034	0.5059	0.6837	0.5134	0.5409
9.25008	0.5516	0.6036	0.5874	0.5973	0.4989	0.5946	0.4253	0.4468	0.5069	0.4137	0.4758	0.4817	0.4112	0.4497	0.4125	0.4411	0.523	0.582	0.5079	0.5362	0.5659	0.6155	0.6405	0.517	0.5432	0.5756	0.4739	0.4768	0.5512	0.5473	0.5942	0.503	0.556	0.5025	0.6829	0.4779	0.6104	0.5626	0.5997	0.5714	0.6108	0.6092	0.5353	0.5012	0.503	0.5051	0.6824	0.5183	0.5408
9.33341	0.5532	0.6043	0.5874	0.6045	0.4994	0.6008	0.4301	0.4471	0.5064	0.4181	0.48	0.4828	0.4145	0.4502	0.4168	0.4456	0.5247	0.5829	0.5079	0.5377	0.5722	0.6218	0.642	0.5202	0.5487	0.5795	0.4746	0.478	0.5484	0.5455	0.5928	0.5052	0.5635	0.5033	0.6806	0.4823	0.6133	0.5639	0.6025	0.5779	0.6117	0.6139	0.5375	0.5063	0.5047	0.5026	0.6883	0.5239	0.5498
9.41675	0.5729	0.622	0.5841	0.6188	0.5149	0.605	0.4339	0.4505	0.514	0.4224	0.4896	0.5031	0.4355	0.4638	0.4201	0.4681	0.5354	0.6065	0.5105	0.5432	0.5842	0.6236	0.6428	0.5321	0.5615	0.5831	0.4854	0.4866	0.5351	0.5593	0.6014	0.5138	0.5706	0.5046	0.6824	0.494	0.6038	0.5733	0.6083	0.5848	0.6207	0.6265	0.558	0.5315	0.505	0.5099	0.6965	0.5319	0.5638
9.50008	0.5498	0.6046	0.5921	0.6049	0.4975	0.5945	0.4272	0.4467	0.5037	0.422	0.4764	0.4823	0.4182	0.4531	0.4154	0.45	0.5226	0.5808	0.4987	0.5329	0.5686	0.6157	0.6363	0.52	0.5466	0.5764	0.4726	0.4759	0.5329	0.5477	0.5962	0.5027	0.5575	0.5021	0.6656	0.4808	0.6122	0.5635	0.6036	0.5781	0.6102	0.6118	0.536	0.5101	0.5024	0.4983	0.678	0.5251	0.5561
9.58338	0.5494	0.6007	0.5928	0.6058	0.4965	0.5872	0.4231	0.4455	0.4997	0.4226	0.4777	0.481	0.4187	0.4512	0.4159	0.4498	0.5219	0.5793	0.4945	0.5325	0.568	0.6121	0.6347	0.5145	0.5454	0.5745	0.4722	0.4759	0.5534	0.5484	0.598	0.5026	0.5561	0.5012	0.659	0.4802	0.61	0.5647	0.6004	0.5758	0.6099	0.6105	0.5365	0.5126	0.5007	0.4947	0.6791	0.5266	0.5583
9.66675	0.548	0.5993	0.5949	0.6004	0.5008	0.5722	0.4204	0.4495	0.4977	0.4278	0.4757	0.4813	0.4172	0.4581	0.4113	0.4477	0.5238	0.5729	0.4929	0.5319	0.5656	0.6078	0.6282	0.516	0.544	0.5726	0.4737	0.4755	0.554	0.5461	0.5993	0.5011	0.5526	0.5051	0.6518	0.4771	0.6147	0.5623	0.604	0.574	0.6092	0.6104	0.5352	0.5104	0.4984	0.4961	0.6751	0.5259	0.5623
9.75008	0.5506	0.601	0.5974	0.5991	0.5035	0.573	0.4239	0.4553	0.4988	0.4356	0.4779	0.4827	0.4199	0.4599	0.4136	0.4475	0.5285	0.5739	0.4939	0.5349	0.5715	0.6037	0.6289	0.516	0.5441	0.5719	0.4775	0.4778	0.559	0.5482	0.6025	0.5053	0.5555	0.5075	0.6509	0.4796	0.6158	0.5635	0.6084	0.5736	0.6045	0.6182	0.5394	0.5155	0.5006	0.4985	0.6762	0.526	0.5721
9.83336	0.5572	0.6019	0.6051	0.5973	0.5068	0.569	0.4229	0.4568	0.5008	0.4408	0.4735	0.4845	0.421	0.4592	0.4139	0.447	0.5295	0.5721	0.4936	0.5358	0.5682	0.6032	0.6289	0.5172	0.5425	0.5743	0.4823	0.4735	0.5503	0.546	0.6039	0.5059	0.5587	0.5096	0.6509	0.4793	0.617	0.5663	0.6102	0.5749	0.6051	0.6169	0.5417	0.52	0.501	0.4985	0.6727	0.5277	0.5806
BASE	0.552673	0.514123	0.522814	0.577964	0.471895	0.52405	0.409909	0.39395	0.490036	0.383477	0.412305	0.446518	0.368491	0.403105	0.406023	0.420441	0.441677	0.435195	0.506918	0.525173	0.527091	0.587859	0.590041	0.505136	0.494605	0.581445	0.469391	0.452373	0.478105	0.504518	0.567895	0.433736	0.494073	0.519609	0.607568	0.477895	0.60625	0.543591	0.575436	0.54585	0.587745	0.527295	0.504132	0.434086	0.475582	0.445955	0.515314	0.446909	0.458168
(2-3.75 min mean)
MAX 5	0.5752	0.622	0.6051	0.6625	0.5797	0.6193	0.4817	0.5189	0.514	0.4711	0.5074	0.5031	0.4507	0.4843	0.4526	0.5167	0.5362	0.6065	0.5179	0.5443	0.5842	0.6236	0.6799	0.5475	0.5633	0.5962	0.4854	0.532	0.559	0.6202	0.6531	0.5138	0.5846	0.5625	0.7051	0.5098	0.6412	0.5977	0.6131	0.5897	0.6221	0.6265	0.558	0.5315	0.565	0.5316	0.6965	0.5417	0.6011
(largest values 4 min +)	0.5729	0.6157	0.6001	0.6562	0.5794	0.619	0.4748	0.5159	0.5086	0.4707	0.5006	0.4876	0.4502	0.4818	0.451	0.5095	0.5355	0.5829	0.5173	0.5433	0.5769	0.6218	0.6744	0.5461	0.5615	0.5953	0.4823	0.5287	0.554	0.6193	0.6511	0.5059	0.5803	0.5623	0.7028	0.5088	0.6409	0.5951	0.6127	0.5876	0.6207	0.6182	0.555	0.5242	0.5621	0.5289	0.6883	0.5388	0.5956
	0.5702	0.6149	0.5996	0.6544	0.573	0.6172	0.4729	0.513	0.508	0.4695	0.5005	0.4874	0.4448	0.4773	0.4423	0.4928	0.5354	0.582	0.5172	0.5432	0.5768	0.6184	0.6738	0.5456	0.5612	0.5943	0.4775	0.5284	0.5534	0.6189	0.65	0.5053	0.5734	0.5611	0.6986	0.5064	0.6399	0.5947	0.6125	0.5874	0.6204	0.6169	0.5519	0.5231	0.5522	0.5286	0.6837	0.5365	0.591
	0.5677	0.6142	0.5974	0.6501	0.5671	0.6165	0.4723	0.5105	0.5073	0.4689	0.4979	0.4853	0.4428	0.4729	0.4396	0.4834	0.5353	0.5808	0.517	0.5427	0.5747	0.6157	0.6733	0.5437	0.5607	0.5928	0.4756	0.5282	0.5531	0.6181	0.6497	0.5052	0.5715	0.5579	0.6975	0.506	0.6399	0.594	0.6118	0.587	0.6201	0.6139	0.5515	0.5222	0.5502	0.5278	0.6832	0.536	0.5905
	0.5674	0.6127	0.5965	0.649	0.5629	0.6162	0.4678	0.5099	0.5069	0.4686	0.4969	0.4851	0.44	0.4724	0.4368	0.473	0.5349	0.5802	0.517	0.5423	0.5737	0.6155	0.6731	0.5428	0.5553	0.591	0.4755	0.5231	0.5525	0.618	0.6497	0.503	0.5706	0.5502	0.6946	0.5058	0.6387	0.5932	0.611	0.5868	0.6193	0.6118	0.5504	0.52	0.5482	0.5276	0.683	0.5347	0.5878
ROW POSITION of MAX 5	22	66	71	37	35	37	33	31	66	35	33	66	46	29	30	30	46	66	52	39	66	66	39	35	43	31	66	37	70	39	39	66	51	35	34	27	22	48	43	33	35	66	66	66	37	37	66	37	39
	66	50	29	36	34	41	32	32	60	32	32	43	47	30	31	31	45	65	57	37	33	65	43	36	66	29	71	39	69	32	37	71	47	34	35	28	39	47	46	32	66	70	37	36	39	39	65	36	41
	24	52	31	38	36	39	34	33	62	37	34	46	45	28	32	32	66	64	56	66	37	62	37	39	44	30	70	36	68	37	35	70	52	36	59	30	31	50	44	37	37	71	36	35	38	36	63	38	43
	23	58	70	35	33	35	35	34	59	36	35	45	49	27	29	33	47	67	53	35	39	67	38	37	45	32	58	38	61	35	36	65	48	37	58	33	31	49	45	35	36	65	39	37	36	35	60	39	42
	27	51	32	34	32	34	31	30	64	34	31	48	48	31	33	29	48	62	53	58	60	64	44	34	46	28	57	35	62	38	36	64	66	38	36	31	34	51	41	34	39	67	40	71	41	38	62	35	37
MAX 2/3	0.5752		0.6051	0.6625	0.5797	0.6193	0.4817	0.5189		0.4711	0.5074		0.4507	0.4843	0.4526	0.5167	0.5362	0.6065	0.5179	0.5443		0.6236	0.6799	0.5475	0.5633	0.5962		0.532	0.559	0.6202	0.6531	0.5138	0.5846	0.5625	0.7051	0.5098		0.5977	0.6131	0.5897	0.6221	0.6265			0.565	0.5316	0.6965	0.5417
2/3 consecutive or +/- 2		0.6157		0.6562	0.5794		0.4748	0.5159	0.5086		0.5006	0.4876	0.4502	0.4818	0.451	0.5095	0.5355	0.5829		0.5433	0.5769	0.6218		0.5461		0.5953	0.4823	0.5287	0.554		0.6511			0.5623	0.7028	0.5088		0.5951		0.5876			0.555	0.5242	0.5621	0.5289	0.6883	0.5388	0.5956
row position from Max 5	0.5702	0.6149		0.6544	0.573		0.4729	0.513	0.508	0.4695	0.5005	0.4874	0.4448	0.4773	0.4423	0.4928		0.582			0.5768		0.6738		0.5612	0.5943	0.4775		0.5534	0.6189			0.5734	0.5611		0.5064	0.6399		0.6125		0.6204		0.5519	0.5231	0.5522		0.6837	0.5365	0.591
	0.5677		0.5974			0.6165			0.5073	0.4689		0.4853					0.5353		0.517	0.5427	0.5747	0.6157	0.6733	0.5437	0.5607			0.5282			0.6497	0.5052					0.6399	0.594	0.6118		0.6201	0.6139	0.5515	0.5222					0.5905
		0.6127				0.6162																								0.618		0.503			0.6946		0.6387			0.5868		0.6118				0.5276
Mean MAX	0.571033	0.614433	0.60125	0.6577	0.577367	0.617333	0.476467	0.515933	0.507967	0.469833	0.502833	0.486767	0.448567	0.481133	0.448633	0.506333	0.535667	0.590467	0.51745	0.543433	0.576133	0.620367	0.675667	0.545767	0.561733	0.595267	0.4799	0.529633	0.555467	0.619033	0.6513	0.507333	0.579	0.561967	0.700833	0.508333	0.6395	0.5956	0.612467	0.588033	0.620867	0.6174	0.5528	0.523167	0.559767	0.529367	0.6895	0.539	0.592367
(mean of Max 2/3 values)
MAX-BASE (delta 340/80)	0.0183606	0.100311	0.0784364	0.0797364	0.105471	0.0932833	0.0665576	0.121983	0.0179303	0.0863561	0.0905288	0.0402485	0.0800758	0.0780288	0.0426106	0.0858924	0.0939894	0.155271	0.0105318	0.0182606	0.0490424	0.0325076	0.0856258	0.0406303	0.0671288	0.0138212	0.0105091	0.0772606	0.0773621	0.114515	0.0834045	0.073597	0.0849273	0.0423576	0.0932652	0.0304379	0.03325	0.0520091	0.0370303	0.0421833	0.0331212	0.0901045	0.0486682	0.0890803	0.0841848	0.0834121	0.174186	0.0920909	0.134198
1%1day
Time (min)
0	0.4097	0.3508	0.3339	0.4903	0.353	0.3694	0.4291	0.392	0.4507	0.4084	0.3519	0.361	0.3308	0.342	0.3844	0.3586	0.3743	0.3256	0.4152	0.3769	0.4309	0.4039	0.3516	0.3053	0.381	0.3731	0.3946	0.3898	0.3862	0	0	0.46	0.092	0.4269	0.2713	0	0	0.428	0.1918	0.2182	0.2275	0	0.3134	0.1718	0	0.5891	0.2971	0.3239	0.3125
0.08334	0.4115	0.3544	0.335	0.4901	0.3557	0.3625	0.4217	0.3946	0.4555	0.4096	0.3538	0.3638	0.3321	0.3446	0.3802	0.3655	0.407	0.328	0.4176	0.3785	0.4332	0.4065	0.3528	0.3054	0.382	0.3744	0.3972	0.391	0.3875	0.4126	0.4073	0.4695	0.4115	0.4553	0.3993	0.4191	0.4282	0.4427	0.3916	0.3851	0.3998	0.3863	0.3881	0.3845	0.4039	0.5066	0.3012	0.327	0.316
0.166747	0.4112	0.3557	0.3356	0.493	0.3563	0.3576	0.4187	0.3966	0.4575	0.4107	0.3544	0.3664	0.3353	0.3529	0.3778	0.3725	0.449	0.3317	0.4195	0.3812	0.437	0.4091	0.3532	0.306	0.3846	0.3758	0.4001	0.3944	0.3889	0.4158	0.4099	0.4893	0.4177	0.4621	0.4016	0.4247	0.4346	0.4485	0.3945	0.3878	0.4042	0.3895	0.3906	0.3869	0.4071	0.4879	0.3	0.332	0.3151
0.250197	0.409	0.3539	0.3368	0.4925	0.3565	0.355	0.4184	0.3958	0.4565	0.412	0.3551	0.3671	0.3388	0.3585	0.3788	0.3777	0.4671	0.3329	0.4323	0.3865	0.4364	0.4106	0.356	0.307	0.3881	0.3763	0.4038	0.403	0.3899	0.4147	0.4065	0.5298	0.4208	0.4712	0.3956	0.4271	0.4378	0.4571	0.3921	0.3834	0.4033	0.3882	0.3846	0.3837	0.4049	0.473	0.3003	0.3355	0.3164
0.333438	0.4107	0.3541	0.3368	0.4923	0.3591	0.3548	0.4263	0.395	0.4569	0.4116	0.3562	0.3661	0.3399	0.3705	0.375	0.3811	0.4675	0.3334	0.4279	0.391	0.4335	0.4132	0.3588	0.3064	0.3907	0.3775	0.4039	0.4148	0.3904	0.4176	0.4096	0.5402	0.4245	0.4937	0.3985	0.4321	0.4417	0.4797	0.3927	0.3832	0.4076	0.3908	0.3876	0.3865	0.4059	0.4815	0.3008	0.3431	0.3176
0.416782	0.4044	0.3506	0.3344	0.4855	0.3569	0.3484	0.46	0.3903	0.4533	0.4079	0.3544	0.3628	0.338	0.3888	0.3688	0.3845	0.4586	0.3326	0.4217	0.3938	0.4366	0.4088	0.3698	0.305	0.3941	0.3736	0.3979	0.4161	0.3875	0.4171	0.4058	0.5335	0.4312	0.4893	0.3947	0.4294	0.4483	0.4751	0.4026	0.3817	0.4048	0.3901	0.3837	0.3826	0.4162	0.4773	0.3012	0.3633	0.3209
0.500013	0.4087	0.3563	0.3375	0.4887	0.363	0.3548	0.4811	0.393	0.4584	0.4123	0.3618	0.3658	0.3456	0.4536	0.3732	0.3956	0.4496	0.3381	0.4295	0.4159	0.4387	0.4157	0.3675	0.308	0.4175	0.3784	0.4034	0.4165	0.3926	0.4189	0.4074	0.5437	0.4405	0.4914	0.3929	0.4349	0.4575	0.4777	0.4101	0.3842	0.4101	0.3926	0.3817	0.3844	0.4238	0.4883	0.3003	0.3928	0.3232
0.583437	0.4066	0.3573	0.3337	0.4894	0.3631	0.3665	0.4476	0.3921	0.4592	0.4114	0.3632	0.364	0.3441	0.4405	0.3697	0.4007	0.4505	0.3355	0.4342	0.41	0.4304	0.4171	0.3605	0.3077	0.4184	0.3777	0.4049	0.4143	0.3927	0.4176	0.4088	0.5392	0.4336	0.4776	0.3893	0.4327	0.451	0.4637	0.4123	0.3835	0.4079	0.3908	0.3781	0.3858	0.4259	0.4889	0.3004	0.3843	0.3234
0.666713	0.4068	0.3564	0.3337	0.4889	0.3613	0.368	0.4193	0.3908	0.457	0.4096	0.3656	0.3618	0.3428	0.4268	0.3658	0.4042	0.4554	0.3351	0.4319	0.4075	0.4251	0.4154	0.3582	0.308	0.416	0.3777	0.4042	0.4131	0.3926	0.4194	0.4138	0.5224	0.432	0.4645	0.3904	0.4331	0.4492	0.4502	0.4042	0.3878	0.4091	0.393	0.379	0.3916	0.4175	0.4856	0.3006	0.3662	0.3242
0.750005	0.4099	0.3569	0.3376	0.4911	0.3622	0.3764	0.4084	0.3919	0.4597	0.4127	0.3672	0.3639	0.345	0.4454	0.3701	0.4172	0.4502	0.337	0.4334	0.4166	0.4275	0.4162	0.3569	0.3097	0.4199	0.3792	0.4044	0.4116	0.3943	0.4218	0.4163	0.5006	0.4276	0.4512	0.3868	0.4316	0.4447	0.4369	0.3918	0.3856	0.4093	0.3951	0.3757	0.3934	0.4055	0.4729	0.2984	0.3464	0.3185
0.833405	0.4087	0.3536	0.335	0.4854	0.3608	0.3895	0.3947	0.3896	0.4575	0.4123	0.3705	0.3597	0.3411	0.4307	0.3688	0.4321	0.446	0.3334	0.4295	0.413	0.4234	0.4155	0.3548	0.3072	0.425	0.3764	0.4042	0.406	0.3915	0.4221	0.4151	0.4883	0.4235	0.4514	0.3848	0.4325	0.441	0.4367	0.3852	0.3863	0.4114	0.3959	0.3736	0.3927	0.3986	0.4626	0.3006	0.3367	0.3212
0.916745	0.413	0.3566	0.3382	0.4906	0.364	0.3987	0.3961	0.3928	0.4615	0.4181	0.369	0.3634	0.3438	0.4333	0.3754	0.4493	0.4702	0.34	0.4327	0.4189	0.4234	0.4182	0.3591	0.3096	0.426	0.3788	0.4067	0.409	0.3954	0.4233	0.4153	0.4815	0.4269	0.4537	0.386	0.433	0.4439	0.4383	0.3828	0.3857	0.4125	0.3963	0.3749	0.3927	0.3962	0.4564	0.2992	0.3308	0.3176
1.00004	0.4144	0.3543	0.3403	0.4897	0.3632	0.3963	0.3942	0.3918	0.4609	0.4129	0.3671	0.3631	0.3397	0.4233	0.373	0.4416	0.4672	0.34	0.4332	0.4167	0.4204	0.4179	0.3606	0.3077	0.4221	0.3799	0.4037	0.4119	0.3956	0.4229	0.4116	0.4737	0.4211	0.4518	0.3828	0.4296	0.4382	0.4361	0.3801	0.3832	0.4092	0.3961	0.3719	0.3889	0.3935	0.453	0.2995	0.3386	0.319
1.08337	0.4137	0.3543	0.3375	0.4931	0.364	0.3895	0.3913	0.3937	0.4659	0.415	0.3611	0.3611	0.3394	0.4261	0.3678	0.4296	0.4579	0.3417	0.4304	0.4167	0.4193	0.4148	0.3605	0.3091	0.4163	0.3768	0.4047	0.4077	0.3984	0.4226	0.4135	0.47	0.421	0.4667	0.3821	0.427	0.438	0.451	0.3789	0.3864	0.4072	0.3954	0.371	0.3906	0.3924	0.4489	0.2973	0.3443	0.3175
1.16668	0.4157	0.3549	0.3353	0.4946	0.3666	0.3895	0.3936	0.3992	0.469	0.4154	0.3598	0.3611	0.341	0.4283	0.3639	0.4142	0.453	0.3443	0.4324	0.4173	0.4225	0.4133	0.3673	0.3091	0.4162	0.3754	0.4056	0.4082	0.4038	0.4199	0.4139	0.4664	0.4219	0.4546	0.3815	0.426	0.4393	0.4383	0.381	0.3849	0.4063	0.3927	0.3707	0.3908	0.3945	0.4441	0.2983	0.3746	0.3205
1.25001	0.4145	0.3544	0.3343	0.494	0.3646	0.3815	0.3965	0.3985	0.469	0.4193	0.3557	0.3605	0.3396	0.4157	0.364	0.4023	0.4378	0.3455	0.429	0.4152	0.4209	0.4126	0.3823	0.3084	0.4149	0.3732	0.4053	0.4086	0.4056	0.4231	0.4207	0.4672	0.4261	0.4407	0.3836	0.4292	0.4437	0.4245	0.386	0.3886	0.4098	0.3956	0.3725	0.3976	0.3999	0.4497	0.2995	0.3812	0.3244
1.33341	0.4148	0.3574	0.3366	0.4972	0.3686	0.3836	0.4157	0.3998	0.4648	0.42	0.354	0.3626	0.3429	0.4137	0.3668	0.3969	0.4321	0.3505	0.4331	0.4144	0.4254	0.4178	0.377	0.3102	0.4157	0.3752	0.4071	0.4185	0.4101	0.4233	0.4209	0.4525	0.4225	0.4351	0.3831	0.4263	0.4402	0.4189	0.3849	0.3856	0.4084	0.3956	0.3722	0.3976	0.3991	0.4449	0.2973	0.3656	0.3204
1.41672	0.4188	0.3579	0.3366	0.4984	0.3692	0.3823	0.4351	0.4003	0.4606	0.4202	0.3544	0.3653	0.3426	0.4135	0.3685	0.3927	0.4272	0.3478	0.4354	0.4164	0.4268	0.4189	0.3735	0.3093	0.4204	0.3773	0.4042	0.4262	0.4091	0.4236	0.4179	0.4363	0.412	0.434	0.3793	0.4216	0.4296	0.4174	0.3849	0.3837	0.4046	0.3963	0.3685	0.3943	0.3987	0.4399	0.2967	0.3444	0.3195
1.50003	0.4109	0.3568	0.3323	0.4909	0.3653	0.3775	0.4915	0.3969	0.4554	0.4182	0.3514	0.3642	0.3391	0.3997	0.3616	0.3788	0.4098	0.3488	0.4308	0.4084	0.4316	0.416	0.3643	0.3085	0.4171	0.3745	0.4029	0.4216	0.4078	0.4263	0.4207	0.432	0.4129	0.4667	0.3798	0.4207	0.4307	0.4499	0.3832	0.3869	0.404	0.3988	0.3689	0.3976	0.3965	0.4356	0.2954	0.3362	0.3183
1.58338	0.4128	0.3568	0.3341	0.4855	0.3667	0.3776	0.5139	0.3983	0.4558	0.4243	0.3555	0.366	0.3397	0.3959	0.3637	0.379	0.4006	0.3493	0.4314	0.4089	0.4333	0.4216	0.3621	0.3095	0.4237	0.3759	0.4044	0.424	0.4102	0.4305	0.4236	0.429	0.4113	0.4792	0.3797	0.4218	0.429	0.4625	0.3873	0.3866	0.4058	0.4028	0.3688	0.4001	0.4012	0.4369	0.2944	0.3319	0.3202
1.66671	0.4117	0.357	0.3337	0.4884	0.3664	0.3727	0.515	0.3994	0.4554	0.4224	0.3603	0.3687	0.3418	0.39	0.3634	0.3748	0.395	0.3519	0.4332	0.4084	0.4336	0.4214	0.3612	0.3094	0.422	0.3757	0.4039	0.4225	0.4122	0.4294	0.4207	0.4243	0.4094	0.4537	0.3774	0.4186	0.4271	0.4368	0.3891	0.3854	0.4021	0.4024	0.3667	0.3967	0.4029	0.4319	0.296	0.3292	0.3226
1.75005	0.4142	0.3541	0.3333	0.4858	0.3666	0.3725	0.511	0.3996	0.455	0.4246	0.364	0.3696	0.3438	0.3795	0.3654	0.3725	0.3932	0.3468	0.4336	0.4058	0.433	0.4165	0.3623	0.3084	0.4166	0.374	0.401	0.4211	0.4131	0.428	0.4221	0.4217	0.4082	0.4347	0.3793	0.417	0.426	0.4177	0.4062	0.385	0.4006	0.4008	0.3686	0.3981	0.4208	0.4256	0.2978	0.3267	0.3222
1.83348	0.4124	0.3511	0.3328	0.4815	0.3652	0.3719	0.504	0.3987	0.4529	0.4356	0.3607	0.3688	0.3418	0.3726	0.3706	0.3679	0.3809	0.3452	0.4326	0.403	0.4314	0.4143	0.3548	0.3084	0.4139	0.371	0.4018	0.4142	0.4147	0.4293	0.4218	0.4238	0.4083	0.4263	0.3787	0.4164	0.4261	0.409	0.4213	0.3873	0.4	0.4019	0.3681	0.3975	0.4359	0.423	0.2962	0.3256	0.3181
1.91676	0.4155	0.349	0.3338	0.4799	0.3654	0.369	0.4948	0.3996	0.4508	0.4334	0.3598	0.3664	0.3413	0.3686	0.3695	0.3675	0.3756	0.3432	0.4318	0.4016	0.4299	0.4126	0.3528	0.3077	0.4166	0.3696	0.4011	0.414	0.419	0.4269	0.4205	0.4263	0.4088	0.4175	0.3781	0.4171	0.4267	0.3999	0.4482	0.3877	0.4003	0.3992	0.3675	0.3962	0.4635	0.419	0.3007	0.3226	0.3177
2.00007	0.4172	0.3486	0.3376	0.4815	0.3666	0.3674	0.481	0.403	0.4532	0.4271	0.3575	0.3622	0.3426	0.364	0.3686	0.369	0.3813	0.3378	0.4322	0.4018	0.428	0.4131	0.356	0.3074	0.4169	0.3702	0.4005	0.4207	0.42	0.4257	0.4162	0.4293	0.4088	0.4094	0.3757	0.4154	0.4261	0.3918	0.4285	0.3833	0.398	0.3978	0.3651	0.3919	0.4433	0.4161	0.2987	0.3194	0.3172
2.08338	0.4129	0.3459	0.3324	0.4798	0.367	0.3666	0.4786	0.4023	0.4549	0.4244	0.3545	0.3586	0.3424	0.3725	0.3662	0.3708	0.3879	0.3451	0.4301	0.4	0.4277	0.4111	0.3529	0.3097	0.4135	0.3674	0.4037	0.4184	0.4197	0.4251	0.4158	0.4292	0.4082	0.4065	0.3755	0.4156	0.4258	0.3893	0.4251	0.3823	0.3983	0.3973	0.365	0.3912	0.4399	0.4151	0.2969	0.3161	0.3184
2.16675	0.416	0.3464	0.3348	0.4827	0.368	0.3686	0.4675	0.4036	0.4562	0.4208	0.3544	0.3567	0.3414	0.3656	0.3636	0.3751	0.391	0.3456	0.4332	0.3979	0.4255	0.4131	0.357	0.3105	0.4104	0.3688	0.4041	0.424	0.4186	0.4236	0.4139	0.4253	0.4018	0.4033	0.3747	0.4141	0.4194	0.3857	0.428	0.3803	0.3972	0.3958	0.3641	0.3894	0.4429	0.4092	0.2967	0.319	0.3164
2.25005	0.415	0.345	0.3332	0.48	0.3694	0.3704	0.4678	0.4072	0.4594	0.4246	0.3549	0.3562	0.345	0.3652	0.3631	0.3795	0.4018	0.3464	0.4333	0.4023	0.4285	0.4115	0.3593	0.3101	0.4101	0.3686	0.4014	0.4257	0.4149	0.429	0.42	0.4309	0.4042	0.4041	0.376	0.4198	0.4216	0.3869	0.416	0.3834	0.4027	0.4013	0.3656	0.3947	0.4307	0.4091	0.2981	0.3206	0.3143
2.33339	0.411	0.3429	0.3304	0.4727	0.3649	0.3718	0.5257	0.4124	0.4661	0.4246	0.3551	0.3547	0.3477	0.3711	0.3618	0.384	0.4074	0.3495	0.4311	0.4034	0.4443	0.4103	0.3576	0.3085	0.408	0.3678	0.4007	0.4225	0.4133	0.4315	0.4216	0.4323	0.4077	0.4019	0.3764	0.4198	0.4253	0.3847	0.4004	0.3823	0.4025	0.4034	0.3659	0.3964	0.4143	0.41	0.2982	0.3211	0.3157
2.41668	0.4127	0.3432	0.3336	0.4746	0.3655	0.3784	0.5489	0.4138	0.4632	0.4308	0.3548	0.3551	0.3464	0.3782	0.3578	0.4018	0.4106	0.3453	0.432	0.403	0.447	0.4117	0.3595	0.3089	0.4012	0.3683	0.4022	0.4245	0.4144	0.4323	0.4212	0.4341	0.4078	0.3985	0.3735	0.4182	0.4256	0.381	0.3928	0.3804	0.4007	0.4032	0.3631	0.3957	0.4067	0.4036	0.3015	0.321	0.3264
2.50004	0.4089	0.3416	0.3307	0.4746	0.3629	0.373	0.5238	0.4136	0.4638	0.4301	0.3531	0.3525	0.3474	0.3883	0.3539	0.4327	0.432	0.3459	0.4294	0.4015	0.4402	0.4085	0.3611	0.3088	0.393	0.3682	0.4002	0.4231	0.4116	0.4332	0.4223	0.4366	0.4091	0.3989	0.3738	0.4207	0.4268	0.381	0.3859	0.3814	0.4034	0.4043	0.3632	0.3969	0.3997	0.4013	0.2967	0.3199	0.3176
2.58335	0.4132	0.3415	0.33	0.4753	0.365	0.3745	0.4913	0.4148	0.4617	0.4309	0.3527	0.3535	0.3596	0.3836	0.3543	0.4576	0.4288	0.343	0.4328	0.4093	0.4371	0.4108	0.3642	0.3102	0.3916	0.3701	0.3997	0.4241	0.4079	0.4357	0.425	0.4338	0.4104	0.4036	0.3749	0.4222	0.4286	0.3856	0.3845	0.3827	0.4055	0.4079	0.3642	0.4	0.3984	0.4037	0.2968	0.3194	0.3152
2.66673	0.4127	0.3388	0.3257	0.47	0.3622	0.3776	0.4626	0.4117	0.4594	0.4234	0.3491	0.3516	0.3721	0.3796	0.3509	0.4244	0.4021	0.3364	0.4266	0.4143	0.429	0.4082	0.3598	0.3071	0.3865	0.368	0.3962	0.4189	0.4045	0.4292	0.4228	0.4291	0.4103	0.4003	0.372	0.4196	0.4287	0.3827	0.3796	0.3794	0.4034	0.4011	0.3614	0.3972	0.3932	0.4021	0.2949	0.3221	0.3152
2.7501	0.4103	0.3438	0.3234	0.4723	0.3637	0.3803	0.4582	0.4112	0.4615	0.4355	0.3481	0.3513	0.4034	0.3862	0.3523	0.4156	0.3954	0.34	0.4293	0.4333	0.4277	0.4084	0.3585	0.3077	0.3863	0.3678	0.3993	0.4149	0.4119	0.4293	0.4241	0.4298	0.4094	0.4035	0.3745	0.4259	0.4275	0.3854	0.3823	0.3822	0.4102	0.4013	0.3638	0.3984	0.3957	0.4032	0.2951	0.3222	0.3184
2.83341	0.4072	0.3465	0.3225	0.4704	0.3638	0.3841	0.4672	0.4107	0.462	0.4284	0.3482	0.3502	0.4488	0.3846	0.3506	0.4052	0.3907	0.3377	0.4293	0.4516	0.4305	0.4069	0.3576	0.3079	0.3881	0.3678	0.4021	0.4167	0.4144	0.433	0.4255	0.4306	0.409	0.4031	0.375	0.4249	0.4271	0.3851	0.382	0.3814	0.4091	0.4048	0.3643	0.3998	0.3952	0.4049	0.2908	0.3229	0.3156
2.91671	0.4136	0.3471	0.3258	0.4726	0.3649	0.382	0.4634	0.4131	0.4662	0.4316	0.349	0.351	0.4441	0.3786	0.3526	0.3994	0.3823	0.3392	0.4313	0.4463	0.4335	0.4065	0.3603	0.3089	0.3896	0.3674	0.404	0.416	0.4163	0.4338	0.4256	0.4418	0.4087	0.403	0.3735	0.4263	0.4269	0.3851	0.3815	0.3824	0.4102	0.4051	0.363	0.3999	0.3948	0.4009	0.2925	0.3259	0.3172
3.00005	0.4091	0.3452	0.3253	0.4631	0.3628	0.3793	0.4474	0.4111	0.4637	0.439	0.3497	0.3496	0.4116	0.3715	0.3524	0.3968	0.3836	0.3364	0.4275	0.431	0.4283	0.4044	0.3628	0.3086	0.3899	0.365	0.4024	0.4152	0.4122	0.4362	0.4264	0.4582	0.4104	0.4033	0.3752	0.4272	0.4287	0.3851	0.3831	0.3807	0.4095	0.4077	0.3648	0.4007	0.3963	0.401	0.2904	0.3244	0.3168
3.08335	0.4082	0.3496	0.3251	0.4661	0.3604	0.3858	0.4395	0.4121	0.4647	0.4358	0.3508	0.3479	0.3921	0.369	0.3525	0.3833	0.3806	0.3333	0.426	0.4213	0.4282	0.4033	0.3755	0.311	0.3895	0.3642	0.4056	0.4164	0.4092	0.4346	0.4222	0.4833	0.4141	0.4062	0.3736	0.4326	0.4323	0.3878	0.3821	0.3822	0.4135	0.4064	0.3629	0.3966	0.3951	0.399	0.2903	0.3293	0.316
3.16668	0.4094	0.3516	0.3272	0.471	0.3621	0.3902	0.4371	0.4113	0.4696	0.4304	0.3518	0.3491	0.3842	0.3621	0.3531	0.3778	0.3763	0.3314	0.428	0.4158	0.432	0.4024	0.3943	0.3144	0.3919	0.3648	0.4034	0.4153	0.4067	0.433	0.4185	0.4706	0.4109	0.4066	0.3732	0.4307	0.4293	0.3883	0.3849	0.3809	0.4127	0.4045	0.3627	0.393	0.3982	0.3966	0.2907	0.3299	0.3176
3.25007	0.4077	0.355	0.3247	0.4735	0.3601	0.3867	0.4308	0.4101	0.4675	0.4297	0.3492	0.3452	0.3953	0.3616	0.3526	0.3738	0.376	0.3324	0.4265	0.418	0.4274	0.3978	0.3907	0.3129	0.3855	0.3636	0.4007	0.4129	0.4015	0.4322	0.4156	0.4543	0.4118	0.4079	0.3741	0.4291	0.4299	0.3893	0.3856	0.3803	0.4125	0.4031	0.3638	0.3898	0.3993	0.3929	0.2914	0.3268	0.3217
3.33343	0.4079	0.3555	0.328	0.4708	0.3614	0.3868	0.433	0.4091	0.4659	0.4385	0.3512	0.3476	0.3886	0.3619	0.3599	0.3744	0.3766	0.3361	0.4304	0.4183	0.4261	0.4007	0.3853	0.312	0.3823	0.3681	0.4003	0.4167	0.401	0.4322	0.4127	0.4438	0.4094	0.4117	0.3731	0.4274	0.4277	0.393	0.3855	0.3805	0.411	0.4032	0.3627	0.3871	0.3991	0.3908	0.2933	0.3274	0.3233
3.41675	0.4138	0.3546	0.3298	0.4674	0.3636	0.3871	0.4457	0.411	0.482	0.435	0.3554	0.3483	0.3746	0.3603	0.3621	0.376	0.3832	0.3346	0.4346	0.4121	0.4295	0.4029	0.3851	0.3128	0.3827	0.3705	0.4039	0.4208	0.402	0.4331	0.413	0.4362	0.4112	0.4155	0.3736	0.4272	0.4298	0.3964	0.3917	0.3819	0.4114	0.4036	0.3632	0.3872	0.4057	0.3901	0.2936	0.3253	0.3184
3.50007	0.4079	0.3477	0.3276	0.4654	0.3595	0.3863	0.4698	0.4049	0.4798	0.429	0.3523	0.3449	0.3638	0.3547	0.3559	0.3731	0.3929	0.3326	0.4316	0.4056	0.4311	0.3998	0.3779	0.3076	0.3766	0.3735	0.4044	0.415	0.3994	0.4347	0.4102	0.428	0.4109	0.4155	0.3727	0.4297	0.4301	0.3952	0.3873	0.3838	0.4157	0.4072	0.3626	0.3855	0.4011	0.3909	0.2983	0.3281	0.3189
3.5834	0.4077	0.3428	0.3296	0.4722	0.3609	0.3846	0.4875	0.4102	0.4882	0.4308	0.3523	0.3475	0.3601	0.3565	0.3583	0.3705	0.4038	0.335	0.4349	0.4026	0.4403	0.4044	0.3752	0.3088	0.3809	0.3836	0.4087	0.4163	0.4045	0.4368	0.4101	0.428	0.4195	0.4156	0.3749	0.4341	0.4389	0.395	0.3883	0.3843	0.4206	0.4085	0.3646	0.3852	0.4024	0.3938	0.3036	0.325	0.3185
3.66676	0.405	0.3375	0.3285	0.4772	0.3619	0.3765	0.4878	0.4087	0.4909	0.4296	0.3502	0.3456	0.3601	0.3547	0.3559	0.3705	0.4151	0.3365	0.435	0.4035	0.4395	0.4028	0.3672	0.3077	0.3816	0.3876	0.4117	0.4178	0.4071	0.4352	0.4103	0.4273	0.4241	0.4133	0.3756	0.4432	0.443	0.3926	0.389	0.3845	0.4308	0.4075	0.3655	0.386	0.4025	0.3925	0.3052	0.3271	0.3193
3.75009	0.4041	0.3357	0.328	0.4717	0.3627	0.3739	0.4717	0.4059	0.4853	0.4271	0.3479	0.345	0.3613	0.3558	0.3596	0.369	0.4172	0.3384	0.4357	0.4047	0.436	0.4031	0.3625	0.308	0.3835	0.387	0.4119	0.418	0.4098	0.4415	0.4102	0.4298	0.4202	0.4164	0.377	0.4423	0.4404	0.3945	0.3932	0.3855	0.4297	0.4143	0.3671	0.3863	0.4067	0.3969	0.3091	0.3264	0.3178
3.83335	0.4094	0.3355	0.3307	0.4738	0.3664	0.3786	0.4611	0.403	0.4762	0.4294	0.3482	0.3463	0.3619	0.3546	0.3659	0.3708	0.4244	0.3405	0.4391	0.4057	0.436	0.4052	0.361	0.3086	0.3864	0.3895	0.407	0.4197	0.4058	0.439	0.4083	0.4271	0.417	0.4168	0.3756	0.4388	0.4374	0.3947	0.3935	0.386	0.4263	0.4118	0.366	0.3846	0.4067	0.3921	0.3046	0.3291	0.3213
3.91669	0.4052	0.3343	0.3285	0.4663	0.3647	0.3772	0.4448	0.4011	0.4657	0.4268	0.3462	0.3478	0.3685	0.3574	0.3665	0.369	0.4343	0.3425	0.4335	0.4069	0.4275	0.4038	0.3553	0.3075	0.3881	0.3835	0.4023	0.4163	0.4043	0.4418	0.4057	0.4293	0.4166	0.4129	0.3749	0.4387	0.4369	0.3904	0.3948	0.3854	0.4256	0.4145	0.3654	0.382	0.4077	0.389	0.2981	0.3278	0.3197
4.00004	0.4016	0.3336	0.3269	0.4687	0.3667	0.3816	0.4256	0.3998	0.457	0.4272	0.3458	0.3493	0.378	0.3609	0.3693	0.3672	0.4353	0.3398	0.4327	0.4113	0.4222	0.4031	0.3548	0.306	0.386	0.3872	0.3982	0.4151	0.4007	0.445	0.4069	0.4323	0.4175	0.4145	0.3765	0.4408	0.4376	0.3918	0.3957	0.3869	0.4273	0.4179	0.3672	0.3837	0.4088	0.3906	0.2952	0.3241	0.3178
4.08343	0.3982	0.3349	0.3258	0.4684	0.38	0.3848	0.4186	0.3987	0.4563	0.4236	0.3487	0.3502	0.3907	0.3658	0.3678	0.3662	0.421	0.3467	0.4337	0.4209	0.4224	0.4032	0.3547	0.3061	0.3788	0.3818	0.3982	0.4157	0.4022	0.4412	0.4081	0.4314	0.4139	0.4184	0.3762	0.4363	0.4338	0.3962	0.3972	0.3864	0.4226	0.4143	0.3673	0.3856	0.4095	0.3889	0.2931	0.3212	0.3149
4.16672	0.3979	0.335	0.3275	0.467	0.3649	0.3843	0.4141	0.3961	0.459	0.4236	0.3495	0.3511	0.4453	0.3699	0.3647	0.3667	0.4242	0.3432	0.4391	0.4537	0.4222	0.4015	0.3554	0.3052	0.39	0.3899	0.3979	0.4137	0.4016	0.4427	0.4098	0.4336	0.4123	0.4224	0.3805	0.432	0.4317	0.4012	0.3958	0.3851	0.4164	0.4139	0.371	0.3856	0.4091	0.3871	0.2981	0.3206	0.3131
4.2501	0.3956	0.3325	0.329	0.4599	0.3644	0.3891	0.4177	0.3994	0.4661	0.4259	0.3492	0.3567	0.4674	0.3759	0.3694	0.3701	0.431	0.3487	0.442	0.4618	0.4309	0.4038	0.3658	0.3084	0.3925	0.3907	0.3997	0.4185	0.403	0.4445	0.4093	0.4344	0.4105	0.4242	0.3822	0.43	0.43	0.4027	0.3954	0.386	0.414	0.4163	0.3725	0.3849	0.4091	0.3919	0.2959	0.3239	0.3138
4.33339	0.395	0.3301	0.3304	0.4601	0.3636	0.3948	0.4291	0.4015	0.4701	0.43	0.349	0.3523	0.4289	0.3838	0.3685	0.366	0.4149	0.3474	0.4363	0.4453	0.4426	0.4028	0.414	0.3195	0.4082	0.3871	0.4097	0.4255	0.4135	0.4453	0.4091	0.4383	0.4108	0.4249	0.3821	0.4277	0.4303	0.4035	0.3925	0.3868	0.4111	0.4168	0.3723	0.3849	0.4065	0.3951	0.2927	0.3241	0.3151
4.41675	0.3985	0.3318	0.3463	0.4617	0.3754	0.4087	0.7599	0.4163	0.4874	0.457	0.3624	0.3558	0.4815	0.4156	0.4067	0.3893	0.4769	0.3592	0.4459	0.4838	0.5493	0.4187	0.415	0.3207	0.4441	0.3992	0.4462	0.4844	0.477	0.4444	0.408	0.4422	0.4069	0.4286	0.3831	0.4295	0.4266	0.4075	0.3939	0.3847	0.4123	0.4156	0.3734	0.3837	0.4079	0.3987	0.2934	0.3248	0.3147
4.50007	0.4049	0.3316	0.3453	0.5431	0.4004	0.4264	0.8059	0.4318	0.5062	0.6536	0.4229	0.3568	0.5203	0.4519	0.6226	0.5312	0.5382	0.3754	0.4639	0.5092	0.5785	0.4321	0.4772	0.3267	0.5277	0.4155	0.5424	0.55	0.5243	0.4471	0.4127	0.4617	0.4183	0.456	0.3908	0.4501	0.4379	0.4352	0.3975	0.3921	0.4336	0.4184	0.3811	0.3885	0.4114	0.4103	0.2967	0.3363	0.3247
4.58337	0.4957	0.3386	0.3518	0.822	0.4876	0.4412	0.8688	0.5202	0.6384	0.6933	0.6014	0.4127	0.5658	0.5022	0.6353	0.586	0.5909	0.3921	0.4732	0.5441	0.6556	0.4771	0.4854	0.342	0.5711	0.4536	0.7153	0.7159	0.7018	0.4466	0.419	0.5694	0.4704	0.4885	0.3998	0.5997	0.4872	0.4678	0.4401	0.3991	0.5896	0.4185	0.3897	0.3951	0.4554	0.4201	0.3267	0.3936	0.4158
4.66676	1.3191	0.3504	0.3783	1.2016	0.6777	0.4688	0.9278	0.8001	1.0284	0.7521	0.6318	0.6065	0.618	0.5315	0.6385	0.5957	0.6049	0.4143	0.4804	0.5812	0.929	0.5593	0.5	0.4993	0.587	0.4845	0.7923	0.8388	0.8618	0.4491	0.4326	0.6009	0.5086	0.4999	0.4343	0.5915	0.5249	0.4794	0.4873	0.469	0.5779	0.4209	0.4248	0.4089	0.4997	0.4346	0.3848	0.4821	0.4472
4.75009	1.2796	0.3791	0.4588	1.1847	0.6069	0.4775	0.9022	0.7822	0.9927	0.7898	0.6541	0.5779	0.65	0.5561	0.6178	0.6066	0.5978	0.4544	0.5013	0.6209	0.911	0.574	0.552	0.4622	0.597	0.4915	0.8209	0.8656	0.893	0.4489	0.4778	0.6096	0.5335	0.5337	0.4512	0.6079	0.5489	0.5132	0.5009	0.5286	0.5945	0.4208	0.4419	0.455	0.5103	0.4447	0.3781	0.4783	0.4423
4.83338	1.2092	0.4895	0.6697	1.1428	0.6426	0.4753	0.8886	0.8236	0.989	0.8026	0.6667	0.6375	0.6984	0.6078	0.5862	0.5944	0.5781	0.5007	0.5783	0.6836	0.9263	0.6368	0.5745	0.4969	0.6057	0.5038	0.8293	0.8522	0.9137	0.4527	0.5713	0.6218	0.5361	0.5519	0.4594	0.6087	0.5518	0.5319	0.5011	0.5338	0.5949	0.4243	0.4501	0.5507	0.5109	0.4526	0.4067	0.5149	0.4505
4.91674	1.1507	0.5824	0.6399	1.1079	0.7024	0.4873	0.8839	0.8196	1.005	0.8035	0.6643	0.6541	0.7076	0.5994	0.5603	0.5951	0.5578	0.4812	0.6143	0.6971	0.9048	0.7845	0.5698	0.496	0.6276	0.5241	0.8043	0.8412	0.893	0.4592	0.5599	0.63	0.5423	0.5625	0.4689	0.6018	0.5578	0.5426	0.4995	0.5629	0.5864	0.4301	0.4599	0.5391	0.508	0.4548	0.4135	0.5325	0.4618
5.00007	1.0669	0.5254	0.6369	1.0516	0.7131	0.5827	0.8716	0.8035	1.0021	0.788	0.6508	0.6596	0.7125	0.5897	0.524	0.5787	0.5315	0.5126	0.6389	0.7039	0.8702	0.7415	0.5648	0.4969	0.6299	0.5163	0.7741	0.8217	0.8531	0.4738	0.5486	0.6228	0.5353	0.5685	0.4802	0.5868	0.551	0.5481	0.4911	0.5603	0.5699	0.4458	0.4714	0.528	0.5005	0.4588	0.426	0.5349	0.4674
5.08338	0.9981	0.5414	0.619	1.0213	0.7125	0.5425	0.8634	0.7854	0.9928	0.7591	0.6309	0.644	0.7134	0.575	0.4938	0.5575	0.5077	0.523	0.6272	0.7013	0.8347	0.7821	0.5522	0.4928	0.6422	0.5215	0.7388	0.7999	0.8085	0.5061	0.5312	0.6063	0.5244	0.5688	0.4838	0.5634	0.5408	0.5487	0.4761	0.5481	0.5457	0.4776	0.4756	0.5096	0.4859	0.4573	0.4275	0.5348	0.468
5.16673	0.9433	0.593	0.5954	0.9745	0.7071	0.556	0.8611	0.7645	0.9968	0.7335	0.6149	0.6192	0.7082	0.5523	0.4763	0.5382	0.488	0.5364	0.6383	0.6988	0.797	0.7451	0.5394	0.4884	0.6084	0.5161	0.7068	0.7863	0.7645	0.5594	0.5268	0.5935	0.5166	0.571	0.4941	0.545	0.534	0.5502	0.4651	0.543	0.5261	0.5322	0.4859	0.5053	0.4752	0.4606	0.4302	0.5377	0.4697
5.25011	0.8889	0.5798	0.5706	0.944	0.6907	0.5787	0.856	0.7431	1.0384	0.7059	0.5999	0.5875	0.7021	0.5337	0.4653	0.518	0.4719	0.527	0.6401	0.694	0.7652	0.7241	0.5219	0.4772	0.5956	0.5129	0.6772	0.7765	0.7258	0.5802	0.5251	0.5747	0.5044	0.564	0.495	0.5189	0.522	0.5436	0.4534	0.5284	0.4994	0.553	0.4868	0.5027	0.4644	0.4558	0.4252	0.5357	0.4578
5.33333	0.8684	0.592	0.5497	0.9425	0.6716	0.5786	0.8644	0.7303	1.045	0.6876	0.5941	0.5622	0.7005	0.5181	0.4655	0.5082	0.4649	0.513	0.6373	0.696	0.7489	0.709	0.5102	0.4706	0.5912	0.5179	0.6558	0.7825	0.7017	0.5926	0.5268	0.5567	0.4946	0.5649	0.495	0.5011	0.5129	0.5439	0.4457	0.5199	0.4809	0.5659	0.4868	0.5045	0.457	0.4565	0.4208	0.5335	0.4505
5.41673	0.838	0.599	0.5241	0.9167	0.6406	0.5637	0.8611	0.7137	1.0474	0.6631	0.5804	0.5343	0.6913	0.5015	0.4549	0.4901	0.4546	0.5041	0.6285	0.6839	0.7255	0.6773	0.4929	0.4552	0.5651	0.5161	0.6328	0.7702	0.6789	0.5945	0.5215	0.5368	0.4812	0.5603	0.4926	0.4807	0.4996	0.5388	0.4361	0.4979	0.4603	0.5683	0.4847	0.4988	0.4484	0.453	0.4127	0.5296	0.4394
5.50007	0.8313	0.5875	0.5034	0.9176	0.6127	0.5664	0.859	0.7009	1.0571	0.6363	0.5704	0.5124	0.6825	0.4834	0.4506	0.4769	0.4431	0.4871	0.6058	0.675	0.7092	0.6465	0.4861	0.443	0.5523	0.5124	0.6166	0.7703	0.6576	0.5833	0.5152	0.5199	0.4675	0.5519	0.4866	0.4656	0.4865	0.5299	0.428	0.4754	0.4452	0.5577	0.479	0.492	0.4411	0.4491	0.4101	0.5346	0.4368
5.58337	0.83	0.5944	0.4861	0.9201	0.5884	0.5655	0.8583	0.6899	1.0793	0.6188	0.5652	0.4976	0.6735	0.4736	0.4497	0.4682	0.4377	0.4725	0.5841	0.6674	0.7014	0.6284	0.4843	0.4379	0.5468	0.5143	0.6117	0.7731	0.6496	0.6007	0.514	0.5088	0.4605	0.5503	0.4846	0.456	0.4801	0.5284	0.4239	0.4603	0.4353	0.5745	0.4769	0.4907	0.4373	0.448	0.4047	0.5321	0.4313
5.66672	0.8348	0.5667	0.4797	0.9006	0.5627	0.5549	0.8602	0.675	1.0753	0.5962	0.5611	0.4895	0.6551	0.4533	0.4567	0.458	0.4289	0.4473	0.5579	0.6551	0.6935	0.6077	0.4868	0.4285	0.5287	0.5125	0.5983	0.7716	0.6351	0.6102	0.5098	0.5023	0.4556	0.5454	0.4794	0.4506	0.475	0.5231	0.4209	0.4453	0.4299	0.5846	0.4717	0.4862	0.4353	0.4457	0.3993	0.528	0.4232
5.75004	0.8146	0.5648	0.4651	0.8978	0.5439	0.5564	0.8525	0.6621	1.0865	0.5811	0.5553	0.48	0.648	0.4505	0.4551	0.4491	0.4258	0.4334	0.5277	0.6463	0.6869	0.5946	0.4825	0.422	0.5256	0.5141	0.6019	0.7683	0.6339	0.6158	0.5117	0.4938	0.4527	0.541	0.4753	0.4481	0.472	0.5188	0.4165	0.4329	0.4278	0.5905	0.4677	0.4879	0.4315	0.4431	0.3971	0.5294	0.4184
5.83332	0.8097	0.5511	0.4613	0.902	0.5277	0.5541	0.855	0.6502	1.0923	0.5723	0.5554	0.478	0.642	0.4481	0.4599	0.4456	0.4267	0.4232	0.5068	0.6403	0.6862	0.588	0.4861	0.421	0.5255	0.5192	0.6044	0.7694	0.6376	0.6131	0.5069	0.4845	0.4442	0.5301	0.4637	0.4403	0.464	0.5074	0.411	0.4193	0.4201	0.5885	0.4561	0.4833	0.4263	0.4368	0.3917	0.5284	0.4154
5.91672	0.8042	0.5466	0.4574	0.9067	0.5105	0.5556	0.8524	0.6415	1.0946	0.5691	0.5546	0.4742	0.6411	0.446	0.4633	0.4412	0.4261	0.4141	0.4893	0.6363	0.6851	0.5857	0.4855	0.4199	0.528	0.5251	0.6109	0.7688	0.6413	0.6134	0.5095	0.4808	0.4432	0.5262	0.4582	0.4391	0.4628	0.5033	0.4103	0.4158	0.4192	0.5888	0.4504	0.4855	0.4262	0.4355	0.3887	0.5314	0.4133
6.00013	0.8163	0.5262	0.4619	0.9174	0.4922	0.5512	0.8601	0.6338	1.0902	0.5574	0.5557	0.4761	0.6341	0.4367	0.474	0.4383	0.4238	0.4034	0.4774	0.6337	0.6888	0.5878	0.4897	0.4158	0.5289	0.5322	0.6081	0.776	0.6375	0.6136	0.5136	0.4797	0.4449	0.5232	0.4518	0.4402	0.4645	0.5006	0.4127	0.4144	0.4201	0.5895	0.4441	0.4901	0.429	0.4337	0.3837	0.5307	0.4122
6.08342	0.8163	0.5326	0.4642	0.918	0.4791	0.5534	0.8679	0.6283	1.0923	0.5548	0.5539	0.4728	0.634	0.4389	0.4716	0.436	0.4272	0.4043	0.4701	0.6327	0.6957	0.5882	0.4921	0.4153	0.526	0.5369	0.6163	0.7811	0.6444	0.6135	0.5143	0.4788	0.4398	0.5184	0.4431	0.4373	0.4595	0.4955	0.4144	0.4123	0.4174	0.5888	0.4354	0.4908	0.4311	0.4303	0.3762	0.5324	0.4095
6.16673	0.8097	0.539	0.4662	0.9166	0.4683	0.55	0.88	0.6239	1.0856	0.5494	0.5533	0.4711	0.6367	0.436	0.4661	0.434	0.4245	0.4003	0.4628	0.6324	0.7009	0.5913	0.4975	0.4168	0.5274	0.5425	0.6187	0.7892	0.6447	0.6133	0.5211	0.4823	0.4409	0.5164	0.4383	0.4403	0.4607	0.4934	0.4223	0.4168	0.4206	0.5886	0.4302	0.4978	0.4393	0.4313	0.3707	0.5312	0.4118
6.25008	0.8219	0.5423	0.4754	0.9341	0.4661	0.5525	0.8894	0.6265	1.0895	0.551	0.5585	0.4737	0.6311	0.4354	0.4693	0.4354	0.4266	0.397	0.4601	0.6343	0.7112	0.5993	0.5098	0.4206	0.5362	0.5509	0.6245	0.7972	0.6519	0.6112	0.5215	0.4762	0.4375	0.5114	0.4283	0.4374	0.457	0.4878	0.4208	0.422	0.4181	0.589	0.4207	0.499	0.4374	0.4291	0.3661	0.5299	0.4119
6.33332	0.8161	0.5762	0.478	0.9299	0.4603	0.5537	0.8887	0.6234	1.0944	0.5523	0.5593	0.4742	0.6377	0.4429	0.4689	0.4331	0.4259	0.4021	0.4533	0.6351	0.7159	0.6012	0.514	0.4238	0.5385	0.5593	0.6334	0.7961	0.6633	0.6062	0.5253	0.4844	0.4356	0.505	0.4198	0.4352	0.4553	0.4813	0.4248	0.4213	0.4152	0.5821	0.4117	0.5027	0.442	0.4266	0.3621	0.5329	0.4131
6.41678	0.8287	0.6002	0.4895	0.9472	0.4592	0.5586	0.8953	0.6243	1.0958	0.5573	0.5592	0.4759	0.6339	0.445	0.4722	0.4343	0.4279	0.404	0.4532	0.6372	0.723	0.6066	0.5276	0.4261	0.5417	0.5697	0.6333	0.8032	0.6714	0.6	0.5263	0.4904	0.4338	0.5005	0.411	0.4341	0.4534	0.4771	0.4225	0.4186	0.4135	0.5751	0.4028	0.5039	0.4389	0.4217	0.3603	0.5376	0.418
6.50005	0.8323	0.6211	0.4929	0.9597	0.456	0.5583	0.8969	0.6198	1.0943	0.5569	0.5569	0.4762	0.6304	0.443	0.473	0.4339	0.4284	0.4002	0.4475	0.6343	0.7259	0.6116	0.5394	0.425	0.5469	0.5792	0.6329	0.8073	0.6738	0.6014	0.5288	0.5006	0.437	0.5018	0.4078	0.4371	0.457	0.4785	0.4229	0.4205	0.4164	0.577	0.3995	0.5066	0.4393	0.4208	0.3549	0.5396	0.4237
6.58334	0.8498	0.6242	0.5011	0.955	0.4532	0.5592	0.893	0.6177	1.0937	0.5557	0.5569	0.4794	0.6305	0.4468	0.4714	0.4341	0.4295	0.4021	0.4451	0.6349	0.7327	0.6197	0.5529	0.4266	0.547	0.5939	0.6373	0.8075	0.6805	0.6086	0.5329	0.5087	0.4407	0.5023	0.4064	0.4401	0.4603	0.479	0.4237	0.4209	0.4188	0.5833	0.3979	0.5104	0.4396	0.4199	0.3525	0.5386	0.4245
6.66675	0.8807	0.6163	0.5085	0.962	0.4542	0.5576	0.9035	0.62	1.091	0.5601	0.5601	0.4838	0.6361	0.4503	0.4787	0.4359	0.4329	0.4043	0.4469	0.6403	0.745	0.627	0.5688	0.4293	0.5595	0.6107	0.6411	0.8124	0.6883	0.6135	0.5424	0.5107	0.4411	0.5019	0.403	0.4399	0.4608	0.4783	0.4219	0.4205	0.4187	0.5881	0.3943	0.5204	0.4374	0.418	0.3508	0.5443	0.4273
6.75002	0.8728	0.6274	0.5141	0.962	0.4527	0.5593	0.9058	0.6161	1.0908	0.5592	0.5587	0.4834	0.6322	0.4513	0.4764	0.4356	0.4337	0.4	0.445	0.6391	0.7508	0.63	0.5768	0.4306	0.5622	0.6167	0.6409	0.8125	0.6936	0.6146	0.5517	0.5137	0.4407	0.5002	0.3998	0.4422	0.4606	0.4766	0.4169	0.4186	0.4208	0.5902	0.3912	0.5301	0.4323	0.4161	0.3525	0.5469	0.4301
6.83336	0.8662	0.6385	0.524	0.96	0.4579	0.5669	0.9163	0.6223	1.103	0.5665	0.5649	0.4896	0.6386	0.4645	0.4763	0.4394	0.4395	0.4053	0.4453	0.646	0.7745	0.6425	0.5962	0.4349	0.5715	0.6313	0.651	0.8211	0.7041	0.6213	0.5904	0.5202	0.4454	0.5023	0.4004	0.4472	0.4649	0.4782	0.4166	0.4215	0.426	0.5975	0.3919	0.5704	0.4313	0.4168	0.3513	0.5498	0.4339
6.91673	0.8532	0.6398	0.5291	0.9661	0.4562	0.5605	0.9162	0.6185	1.1106	0.5675	0.5653	0.4907	0.6371	0.4655	0.4764	0.4367	0.438	0.4032	0.441	0.6421	0.7879	0.6481	0.6085	0.4323	0.5729	0.6407	0.6573	0.8165	0.7096	0.6255	0.6482	0.5238	0.4485	0.5024	0.3998	0.4479	0.468	0.4785	0.4144	0.4217	0.4267	0.6016	0.3912	0.6303	0.4283	0.4182	0.3538	0.5494	0.444
7.00007	0.8567	0.6474	0.5436	0.9547	0.4596	0.5514	0.9228	0.6235	1.1164	0.5708	0.5685	0.494	0.6404	0.4639	0.491	0.4403	0.4391	0.4044	0.4463	0.6472	0.8056	0.6575	0.6326	0.4364	0.5835	0.6503	0.6641	0.8262	0.7148	0.634	0.6703	0.5278	0.4493	0.5008	0.401	0.4507	0.4688	0.4768	0.4144	0.4218	0.429	0.6108	0.3924	0.6533	0.4279	0.4203	0.3574	0.5556	0.4479
7.08335	0.8667	0.6358	0.5492	0.9633	0.4615	0.5548	0.9284	0.6287	1.1331	0.5756	0.5693	0.4955	0.6415	0.4643	0.4958	0.4397	0.4388	0.4066	0.4499	0.6505	0.8208	0.6645	0.6467	0.4381	0.5906	0.6578	0.6728	0.8333	0.7222	0.6383	0.6769	0.5285	0.4511	0.5007	0.4027	0.4505	0.4705	0.4767	0.4124	0.4224	0.4294	0.615	0.394	0.6601	0.4256	0.422	0.3589	0.5552	0.452
7.16671	0.8931	0.6307	0.5488	0.9932	0.4629	0.5675	0.9364	0.6356	1.1437	0.5871	0.5738	0.4939	0.6374	0.4675	0.5098	0.4416	0.4405	0.4086	0.4525	0.6532	0.8332	0.67	0.6608	0.4414	0.5942	0.6645	0.6853	0.8384	0.7315	0.6454	0.682	0.5296	0.4511	0.5035	0.403	0.4493	0.47	0.4795	0.4085	0.4218	0.4272	0.6222	0.394	0.6658	0.421	0.4245	0.3654	0.5557	0.4589
7.25006	0.8688	0.6324	0.5427	0.983	0.4634	0.5694	0.9357	0.6369	1.148	0.59	0.5706	0.4883	0.6438	0.467	0.5131	0.4364	0.4399	0.4114	0.4502	0.6514	0.8408	0.67	0.6664	0.4406	0.5979	0.6662	0.696	0.8354	0.7375	0.6487	0.6809	0.5374	0.4514	0.5075	0.4029	0.449	0.4703	0.4838	0.4067	0.4223	0.4268	0.6264	0.394	0.6654	0.4191	0.426	0.3674	0.5608	0.4629
7.3334	0.8771	0.6038	0.5444	0.9772	0.4662	0.5703	0.9409	0.6392	1.1588	0.5847	0.5673	0.4903	0.6319	0.4589	0.5296	0.4355	0.4379	0.4078	0.4511	0.6498	0.8448	0.6671	0.6736	0.4397	0.5993	0.6621	0.6939	0.8409	0.7349	0.6532	0.6846	0.5402	0.4515	0.5092	0.4039	0.4482	0.4708	0.4851	0.4034	0.423	0.4257	0.6317	0.3948	0.6686	0.4153	0.4271	0.3708	0.5598	0.4661
7.41675	0.9126	0.6101	0.5517	1.0009	0.4729	0.573	0.9467	0.6446	1.1829	0.5922	0.5743	0.4931	0.6403	0.467	0.5397	0.4393	0.4427	0.4169	0.4524	0.6536	0.8575	0.6704	0.6812	0.4462	0.6044	0.672	0.7099	0.8423	0.7501	0.6604	0.6893	0.5451	0.4549	0.5123	0.4071	0.4501	0.4739	0.4885	0.4034	0.4254	0.4272	0.6386	0.398	0.6732	0.4158	0.4313	0.3718	0.562	0.4699
7.50007	0.936	0.5835	0.5539	1.0422	0.4767	0.5791	0.9517	0.6443	1.1849	0.5957	0.5726	0.4956	0.6336	0.4612	0.5449	0.4387	0.4395	0.4125	0.4513	0.6525	0.8582	0.6638	0.6827	0.445	0.6035	0.6686	0.709	0.8432	0.747	0.6575	0.6858	0.5413	0.4516	0.5105	0.4072	0.4467	0.4707	0.4864	0.4003	0.4257	0.4241	0.6363	0.398	0.6704	0.4117	0.4308	0.3744	0.5626	0.4693
7.58346	0.9814	0.5588	0.5616	1.0642	0.4791	0.5863	0.9596	0.649	1.2014	0.6043	0.5761	0.5007	0.6351	0.4585	0.555	0.4409	0.4374	0.4157	0.4525	0.6541	0.8635	0.6638	0.6933	0.4513	0.6072	0.672	0.7137	0.849	0.7502	0.661	0.6874	0.5496	0.452	0.5159	0.4105	0.4488	0.4707	0.492	0.4045	0.427	0.4258	0.6392	0.4012	0.6716	0.4162	0.4382	0.3801	0.5654	0.4741
7.66679	1.0055	0.5353	0.5644	1.0957	0.4823	0.597	0.9605	0.6525	1.2074	0.6142	0.5829	0.508	0.6328	0.4593	0.5609	0.4391	0.4375	0.4179	0.4521	0.655	0.8645	0.6686	0.6976	0.4539	0.6066	0.6744	0.7185	0.8471	0.7534	0.6692	0.6885	0.5512	0.4533	0.5211	0.4128	0.4519	0.4724	0.4971	0.4049	0.4313	0.4291	0.6488	0.4033	0.6718	0.4163	0.4467	0.3761	0.5621	0.4688
7.75004	1.0225	0.4935	0.5611	1.1059	0.4819	0.6008	0.9483	0.6481	1.2016	0.613	0.5845	0.5154	0.6235	0.4515	0.5603	0.4353	0.4325	0.4107	0.4491	0.6471	0.8536	0.6659	0.6925	0.4525	0.6004	0.6667	0.7141	0.8419	0.7471	0.6702	0.6799	0.552	0.4482	0.5213	0.4103	0.4504	0.4675	0.497	0.4035	0.4318	0.4274	0.6504	0.4008	0.6633	0.4146	0.4459	0.3783	0.5636	0.471
7.83338	1.0466	0.4904	0.5666	1.1143	0.4882	0.6166	0.9563	0.6555	1.2074	0.6245	0.589	0.5191	0.6318	0.4548	0.5696	0.438	0.4357	0.4102	0.4512	0.6529	0.855	0.6773	0.7005	0.4577	0.6036	0.6731	0.7224	0.8536	0.7565	0.6739	0.6788	0.5653	0.4519	0.5225	0.4142	0.4531	0.4705	0.4994	0.4107	0.4293	0.4288	0.6528	0.4049	0.6604	0.423	0.4482	0.3791	0.5672	0.4718
7.91667	1.0767	0.4846	0.571	1.1373	0.4906	0.6168	0.9584	0.6623	1.2102	0.6286	0.5946	0.52	0.6249	0.4557	0.5767	0.4399	0.4352	0.4111	0.4544	0.6554	0.858	0.6818	0.7042	0.4578	0.6045	0.6749	0.7241	0.855	0.7589	0.673	0.6714	0.5619	0.4534	0.5238	0.4125	0.4522	0.4732	0.4996	0.4045	0.4345	0.4283	0.6519	0.4027	0.6538	0.4155	0.4476	0.3807	0.5672	0.4748
8.00009	1.0828	0.4718	0.5715	1.139	0.4946	0.6193	0.954	0.667	1.2036	0.6285	0.5889	0.5064	0.6311	0.4593	0.5741	0.4371	0.4361	0.4201	0.4521	0.6542	0.8487	0.6776	0.7056	0.4583	0.6014	0.6745	0.7312	0.8526	0.7652	0.6761	0.6668	0.5629	0.4555	0.5285	0.4129	0.4521	0.475	0.5046	0.4081	0.4372	0.4288	0.6558	0.403	0.6485	0.4192	0.4501	0.3821	0.5673	0.4768
8.0834	1.0949	0.4634	0.5743	1.1418	0.4954	0.6213	0.9504	0.6634	1.1954	0.6194	0.5869	0.5054	0.6219	0.4555	0.5753	0.4362	0.4308	0.4204	0.4509	0.6527	0.8428	0.6883	0.7081	0.4605	0.5983	0.6742	0.7218	0.8526	0.7592	0.6831	0.6638	0.5659	0.4597	0.5292	0.4152	0.4521	0.479	0.5056	0.4116	0.437	0.4285	0.6613	0.4051	0.6451	0.4227	0.4515	0.3849	0.5673	0.4794
8.16667	1.1078	0.4467	0.5753	1.149	0.4926	0.6236	0.9511	0.6629	1.1934	0.6196	0.5842	0.5026	0.6159	0.4533	0.5748	0.4357	0.4297	0.4235	0.4526	0.6486	0.8385	0.6952	0.7118	0.4599	0.594	0.6754	0.7198	0.8493	0.758	0.6813	0.6595	0.5697	0.4644	0.5316	0.414	0.4539	0.4842	0.5072	0.4116	0.4347	0.4307	0.6609	0.4039	0.6411	0.4228	0.4513	0.3869	0.5718	0.4804
8.25	1.1092	0.4321	0.574	1.1423	0.4902	0.6247	0.9534	0.662	1.1897	0.6198	0.5862	0.5058	0.6072	0.4514	0.5764	0.4347	0.4283	0.4203	0.4529	0.6452	0.8353	0.6995	0.7139	0.4601	0.5858	0.6776	0.7207	0.8512	0.7576	0.6842	0.6557	0.5722	0.4708	0.5354	0.4158	0.4541	0.4902	0.5116	0.4099	0.4372	0.4305	0.6638	0.4058	0.6368	0.4209	0.4523	0.3884	0.5729	0.4798
8.3334	1.1283	0.416	0.5846	1.1621	0.4913	0.6293	0.9675	0.6661	1.1954	0.6268	0.5944	0.5146	0.616	0.4565	0.5808	0.4386	0.4341	0.4268	0.4573	0.6498	0.8406	0.6919	0.7217	0.4667	0.5874	0.6845	0.7281	0.8558	0.7692	0.6891	0.6534	0.5743	0.4775	0.5369	0.4167	0.4556	0.4974	0.5128	0.415	0.4396	0.4321	0.6685	0.4068	0.6344	0.4259	0.4523	0.3873	0.5681	0.4739
8.41675	1.1303	0.4153	0.5857	1.1632	0.4909	0.6204	0.9732	0.6612	1.1839	0.6259	0.5944	0.5151	0.6059	0.4506	0.5852	0.4393	0.4333	0.4225	0.4592	0.6514	0.8366	0.7005	0.7253	0.4673	0.5823	0.6885	0.7251	0.8647	0.7661	0.6887	0.6481	0.575	0.4801	0.537	0.4149	0.4553	0.5	0.5128	0.4116	0.4366	0.4318	0.6687	0.4051	0.6286	0.4228	0.4513	0.3967	0.5712	0.4743
8.5001	1.0918	0.4411	0.5805	1.1399	0.485	0.6266	0.9667	0.655	1.1726	0.6251	0.5883	0.5014	0.6093	0.4521	0.5667	0.4336	0.4341	0.4291	0.4535	0.6453	0.8318	0.7021	0.7144	0.4622	0.5688	0.6888	0.73	0.8439	0.7716	0.6965	0.6485	0.5846	0.492	0.5463	0.4182	0.4592	0.5122	0.5222	0.4175	0.4398	0.4358	0.6764	0.4081	0.6292	0.429	0.4537	0.3962	0.568	0.4684
8.58343	1.0979	0.4864	0.5983	1.1431	0.4894	0.6175	0.9799	0.6546	1.1674	0.6273	0.5947	0.5107	0.606	0.4489	0.5734	0.438	0.4392	0.4304	0.4614	0.6498	0.8334	0.6929	0.7222	0.4671	0.5703	0.6922	0.7278	0.851	0.7722	0.6941	0.6454	0.5859	0.4962	0.5533	0.4183	0.4582	0.5168	0.5289	0.4209	0.4399	0.4341	0.6731	0.4076	0.6252	0.4326	0.4596	0.4006	0.5717	0.4686
8.66668	1.08	0.5253	0.6006	1.13	0.4896	0.612	0.9825	0.6525	1.1665	0.6276	0.5927	0.5076	0.6113	0.449	0.5704	0.437	0.4395	0.4297	0.4606	0.6553	0.8295	0.6818	0.72	0.4657	0.564	0.6955	0.7253	0.8476	0.7715	0.6923	0.6399	0.5868	0.4973	0.5606	0.4201	0.4581	0.518	0.5366	0.4228	0.4395	0.4342	0.6714	0.4094	0.62	0.4343	0.4691	0.3997	0.5662	0.4647
8.75005	1.0662	0.5059	0.5976	1.1419	0.491	0.6084	0.9844	0.648	1.1595	0.6258	0.5895	0.4996	0.6152	0.4507	0.5671	0.4372	0.4406	0.431	0.4606	0.6612	0.8279	0.6915	0.7229	0.4624	0.5568	0.7026	0.7279	0.8473	0.7738	0.6921	0.639	0.5914	0.5022	0.5692	0.4228	0.4608	0.5229	0.5453	0.4243	0.4392	0.4367	0.6713	0.4118	0.6183	0.4362	0.472	0.3915	0.5725	0.4615
8.83341	1.0657	0.4628	0.6021	1.1526	0.4902	0.6054	0.9929	0.6504	1.1581	0.6252	0.5992	0.5108	0.6154	0.4505	0.5675	0.4387	0.4413	0.4307	0.466	0.6633	0.8268	0.6824	0.7289	0.46	0.5541	0.7062	0.7299	0.8452	0.777	0.6885	0.6384	0.5927	0.5018	0.5697	0.4218	0.4615	0.522	0.5457	0.4221	0.4352	0.437	0.6673	0.4112	0.6169	0.4344	0.4665	0.393	0.5715	0.4638
8.91674	1.0492	0.4278	0.5974	1.1452	0.488	0.6217	0.9854	0.6418	1.1486	0.6209	0.6049	0.5259	0.5969	0.4437	0.5638	0.4348	0.4376	0.4276	0.4638	0.6503	0.8166	0.6876	0.7281	0.4514	0.5477	0.7025	0.7228	0.835	0.7716	0.685	0.6349	0.5946	0.5008	0.5758	0.4229	0.4652	0.5215	0.5525	0.4176	0.4327	0.4408	0.6635	0.4123	0.6124	0.4297	0.4643	0.4006	0.5707	0.4615
9.00005	1.0379	0.4207	0.5869	1.1415	0.4866	0.6125	0.9883	0.6423	1.1474	0.62	0.6007	0.5158	0.5964	0.4416	0.5577	0.4362	0.437	0.4268	0.4622	0.6485	0.8149	0.6914	0.7275	0.4491	0.5475	0.7077	0.7264	0.8301	0.7739	0.6863	0.63	0.6044	0.5065	0.5792	0.4258	0.4646	0.5273	0.555	0.4172	0.4348	0.4398	0.6653	0.415	0.6089	0.4291	0.4605	0.4234	0.5691	0.4616
9.0834	1.0243	0.4147	0.5831	1.1439	0.4893	0.5932	0.9927	0.6388	1.142	0.6167	0.5999	0.5144	0.594	0.4405	0.5554	0.4382	0.4365	0.4283	0.4629	0.647	0.8138	0.6797	0.7272	0.4455	0.5427	0.706	0.7218	0.8291	0.7734	0.6774	0.6212	0.6065	0.5043	0.5764	0.4217	0.464	0.5251	0.552	0.413	0.4347	0.4391	0.6557	0.4111	0.5998	0.4246	0.452	0.4242	0.5597	0.4595
9.16674	1.0022	0.4116	0.5791	1.1298	0.4852	0.6084	0.9853	0.6321	1.1283	0.609	0.5895	0.4979	0.5834	0.4388	0.5472	0.4353	0.4344	0.4235	0.4587	0.6386	0.8061	0.6705	0.7211	0.44	0.5346	0.7029	0.7147	0.8158	0.7673	0.6735	0.6184	0.6157	0.5061	0.5791	0.424	0.4663	0.5266	0.5561	0.4145	0.4349	0.4413	0.6517	0.4139	0.5977	0.4259	0.4514	0.436	0.5645	0.4626
9.25008	0.9954	0.4172	0.5835	1.1513	0.4857	0.6387	0.9889	0.6331	1.1287	0.6101	0.5856	0.494	0.5847	0.4412	0.5519	0.437	0.4369	0.4268	0.4613	0.6417	0.8039	0.6834	0.7231	0.4392	0.5337	0.7134	0.7209	0.809	0.7708	0.6638	0.6159	0.6178	0.5092	0.5855	0.4243	0.4667	0.5296	0.5619	0.4163	0.4378	0.442	0.6423	0.414	0.5955	0.4274	0.4501	0.4474	0.5645	0.4622
9.33341	0.9702	0.423	0.5862	1.1346	0.4827	0.6463	1.0077	0.6338	1.121	0.6086	0.5825	0.4842	0.5888	0.4432	0.5519	0.4395	0.4387	0.4256	0.4622	0.6393	0.8115	0.6893	0.7263	0.4437	0.5331	0.7249	0.7244	0.8124	0.7772	0.6588	0.6141	0.6168	0.507	0.5873	0.4219	0.4665	0.5274	0.5638	0.4125	0.4338	0.4413	0.6368	0.4117	0.5933	0.4236	0.4453	0.4466	0.5662	0.461
9.41675	0.9494	0.4217	0.5919	1.1197	0.4824	0.6508	1.0058	0.6325	1.1027	0.6068	0.5822	0.4819	0.5705	0.4404	0.5547	0.437	0.4401	0.4256	0.4615	0.6285	0.8029	0.673	0.724	0.4408	0.5295	0.7213	0.7261	0.8025	0.7751	0.6565	0.6161	0.6206	0.5074	0.5896	0.4239	0.464	0.5279	0.5654	0.4136	0.4358	0.4388	0.6345	0.4135	0.5952	0.4242	0.4424	0.4378	0.5648	0.4587
9.50008	0.9237	0.4261	0.6006	1.1151	0.484	0.6645	1.0113	0.6315	1.0886	0.6007	0.5831	0.4877	0.5628	0.4421	0.5554	0.4358	0.4397	0.4259	0.4598	0.6235	0.8033	0.6855	0.7251	0.4411	0.529	0.725	0.7252	0.81	0.7764	0.6543	0.6179	0.6241	0.5083	0.5955	0.4236	0.4653	0.5288	0.5717	0.4159	0.4357	0.4403	0.6315	0.4133	0.5977	0.4269	0.4413	0.4393	0.5652	0.4588
9.58338	0.9077	0.43	0.6063	1.1178	0.4841	0.6641	1.0103	0.6336	1.0731	0.5957	0.586	0.4941	0.5608	0.4433	0.555	0.4357	0.4396	0.4245	0.462	0.6258	0.8008	0.7087	0.7256	0.4423	0.5284	0.7305	0.7238	0.808	0.7768	0.653	0.6201	0.6339	0.5106	0.5987	0.4238	0.4676	0.5311	0.5748	0.4181	0.4381	0.4422	0.6308	0.4131	0.5996	0.4296	0.4408	0.4514	0.5647	0.4593
9.66675	0.8865	0.4439	0.6107	1.1021	0.4806	0.6696	1.0094	0.6342	1.0618	0.5896	0.5863	0.492	0.5623	0.443	0.5576	0.4351	0.4417	0.4248	0.4613	0.625	0.7988	0.6898	0.7279	0.4452	0.5318	0.7268	0.7214	0.8077	0.7744	0.6561	0.6188	0.6574	0.511	0.6055	0.4242	0.4673	0.5318	0.5826	0.4153	0.4362	0.4408	0.6333	0.4138	0.5985	0.4269	0.4484	0.4519	0.5642	0.4606
9.75008	0.8595	0.462	0.6235	1.1014	0.4856	0.6765	1.017	0.6362	1.0557	0.5914	0.5893	0.4934	0.564	0.4469	0.5588	0.4372	0.4433	0.4255	0.464	0.6284	0.8022	0.6812	0.7327	0.4489	0.5347	0.7282	0.7241	0.8077	0.776	0.6609	0.6213	0.6716	0.5138	0.6112	0.4257	0.4708	0.5344	0.5875	0.4132	0.437	0.444	0.6382	0.4152	0.6007	0.4244	0.4489	0.4569	0.5668	0.4597
9.83336	0.8317	0.4662	0.6279	1.1044	0.4835	0.6689	1.0076	0.6278	1.0291	0.5799	0.5927	0.4948	0.5541	0.4405	0.5525	0.4366	0.447	0.4216	0.4648	0.6171	0.7862	0.6832	0.7214	0.4481	0.5308	0.7307	0.7163	0.7991	0.7722	0.6509	0.6187	0.6801	0.5129	0.612	0.4244	0.4696	0.5337	0.5882	0.4083	0.4314	0.442	0.6284	0.4138	0.5976	0.4194	0.4504	0.4562	0.5653	0.458
BASE	0.410523	0.34575	0.328814	0.47295	0.363605	0.378723	0.472105	0.409627	0.467509	0.429868	0.351918	0.351105	0.374209	0.369345	0.357182	0.390014	0.396209	0.339027	0.430945	0.413527	0.432609	0.406441	0.367286	0.309523	0.392709	0.370377	0.40305	0.418814	0.410041	0.432314	0.418327	0.438286	0.410814	0.406732	0.374477	0.425727	0.429068	0.38825	0.393514	0.382095	0.409482	0.404059	0.364027	0.393132	0.407327	0.401077	0.296491	0.323605	0.317995
(2-3.75 min mean)
MAX 5	1.3191	0.6474	0.6697	1.2016	0.7131	0.6765	1.017	0.8236	1.2102	0.8035	0.6667	0.6596	0.7134	0.6078	0.6385	0.6066	0.6049	0.5364	0.6401	0.7039	0.929	0.7845	0.7327	0.4993	0.6422	0.7307	0.8293	0.8656	0.9137	0.6965	0.6893	0.6801	0.5423	0.612	0.495	0.6087	0.5578	0.5882	0.5011	0.5629	0.5949	0.6764	0.4868	0.6732	0.5109	0.472	0.4569	0.5729	0.4804
(largest values 4 min +)	1.2796	0.6398	0.6399	1.1847	0.7125	0.6696	1.0113	0.8196	1.2074	0.8026	0.6643	0.6541	0.7125	0.5994	0.6353	0.5957	0.5978	0.527	0.6389	0.7013	0.9263	0.7821	0.7289	0.4969	0.6299	0.7305	0.8209	0.8647	0.893	0.6941	0.6885	0.6716	0.5361	0.6112	0.495	0.6079	0.5518	0.5875	0.5009	0.5603	0.5945	0.6731	0.4868	0.6718	0.5103	0.4691	0.4562	0.5725	0.4798
	1.2092	0.6385	0.6369	1.1632	0.7071	0.6689	1.0103	0.8035	1.2074	0.7898	0.6541	0.644	0.7082	0.5897	0.6226	0.5951	0.5909	0.523	0.6383	0.6988	0.911	0.7451	0.7281	0.4969	0.6276	0.7282	0.8043	0.8558	0.893	0.6923	0.6874	0.6574	0.5353	0.6055	0.4941	0.6018	0.551	0.5826	0.4995	0.5481	0.5896	0.6714	0.4859	0.6716	0.508	0.4665	0.4519	0.5718	0.4794
	1.1507	0.6358	0.6279	1.1621	0.7024	0.6645	1.0094	0.8001	1.2036	0.788	0.6508	0.6375	0.7076	0.575	0.6178	0.5944	0.5781	0.513	0.6373	0.6971	0.9048	0.7415	0.7279	0.496	0.6084	0.7268	0.7923	0.855	0.8618	0.6921	0.6858	0.6339	0.5335	0.5987	0.4926	0.5997	0.5489	0.5748	0.4911	0.543	0.5864	0.6713	0.4847	0.6704	0.5005	0.4643	0.4514	0.5717	0.4768
	1.1303	0.6324	0.6235	1.1526	0.6907	0.6641	1.0077	0.7854	1.2016	0.7591	0.6318	0.6192	0.7021	0.5561	0.5862	0.586	0.5578	0.5126	0.6285	0.696	0.8702	0.7241	0.7275	0.4928	0.6072	0.725	0.7741	0.8536	0.8531	0.6891	0.6846	0.63	0.5244	0.5955	0.4866	0.5915	0.5408	0.5717	0.4873	0.5338	0.5779	0.6687	0.479	0.6686	0.4997	0.4606	0.4474	0.5715	0.4748
ROW POSITION of MAX 5	9	37	11	9	13	70	70	11	48	12	11	13	14	11	9	10	9	15	16	13	9	12	70	9	14	71	11	10	11	55	42	71	12	71	16	11	12	71	11	12	11	55	16	42	11	58	70	52	51
	10	36	12	10	14	69	67	12	45	11	12	12	13	12	8	9	10	16	13	14	11	14	59	11	13	68	10	54	10	56	45	70	11	70	16	10	11	70	10	13	10	56	16	45	10	57	71	58	52
	11	35	13	54	15	71	68	13	45	10	10	14	15	13	7	12	8	14	15	15	10	15	60	11	12	70	12	53	10	57	44	69	13	69	15	12	13	69	12	14	8	57	15	44	12	59	69	51	50
	12	38	71	53	12	67	69	9	49	13	13	11	12	14	10	11	11	17	17	12	12	13	69	12	15	69	9	48	9	58	43	68	10	68	18	8	10	68	13	15	12	58	18	43	13	60	68	56	49
	54	40	70	59	16	68	65	14	46	14	9	15	16	10	11	8	12	13	18	17	13	16	61	14	44	67	13	47	13	53	41	12	14	67	19	9	14	67	9	11	9	54	19	41	9	15	64	59	48
MAX 2/3	1.3191	0.6474	0.6697	1.2016	0.7131	0.6765	1.017	0.8236	1.2102	0.8035	0.6667	0.6596	0.7134	0.6078	0.6385	0.6066	0.6049	0.5364	0.6401	0.7039	0.929	0.7845		0.4993	0.6422	0.7307	0.8293	0.8656	0.9137	0.6965	0.6893	0.6801	0.5423	0.612	0.495	0.6087	0.5578	0.5882	0.5011	0.5629	0.5949	0.6764	0.4868	0.6732	0.5109	0.472	0.4569	0.5729	0.4804
2/3 consecutive or +/- 2	1.2796	0.6398	0.6399	1.1847	0.7125	0.6696		0.8196	1.2074	0.8026	0.6643	0.6541	0.7125	0.5994	0.6353	0.5957	0.5978	0.527		0.7013	0.9263	0.7821	0.7289	0.4969	0.6299		0.8209		0.893	0.6941	0.6885	0.6716	0.5361	0.6112	0.495	0.6079	0.5518	0.5875	0.5009	0.5603	0.5945	0.6731	0.4868		0.5103	0.4691	0.4562		0.4798
row position from Max 5	1.2092		0.6369		0.7071	0.6689	1.0103	0.8035			0.6541	0.644	0.7082	0.5897			0.5909	0.523	0.6383	0.6988	0.911		0.7281	0.4969	0.6276	0.7282	0.8043		0.893	0.6923	0.6874	0.6574	0.5353	0.6055	0.4941	0.6018	0.551	0.5826	0.4995	0.5481		0.6714	0.4859	0.6716	0.508	0.4665	0.4519	0.5718	0.4794
		0.6358					1.0094		1.2036	0.788					0.6178	0.5944			0.6373			0.7415				0.7268															0.5864			0.6704
																							0.7275
Mean MAX	1.2693	0.641	0.648833	1.19315	0.7109	0.671667	1.01223	0.815567	1.20707	0.798033	0.6617	0.652567	0.711367	0.598967	0.630533	0.5989	0.597867	0.5288	0.638567	0.701333	0.9221	0.769367	0.728167	0.4977	0.633233	0.728567	0.818167	0.8656	0.8999	0.6943	0.6884	0.6697	0.5379	0.609567	0.4947	0.606133	0.553533	0.5861	0.5005	0.5571	0.591933	0.673633	0.4865	0.671733	0.509733	0.4692	0.455	0.57235	0.479867
(mean of Max 2/3 values)
MAX-BASE (delta 340/80)	0.858777	0.29525	0.32002	0.7202	0.347295	0.292944	0.540129	0.405939	0.739558	0.368165	0.309782	0.301462	0.337158	0.229621	0.273352	0.208886	0.201658	0.189773	0.207621	0.287806	0.489491	0.362926	0.36088	0.188177	0.240524	0.358189	0.415117	0.446786	0.489859	0.261986	0.270073	0.231414	0.127086	0.202835	0.120223	0.180406	0.124465	0.19785	0.106986	0.175005	0.182452	0.269574	0.122473	0.278602	0.102406	0.0681227	0.158509	0.248745	0.161871
	Act 21%
	Baseline												Max-Base
	0.21	1%1day		Shapiro-Wilk test	0.21	1%1day							0.21	1%1day		Shapiro-Wilk test	0.21	1%1day
	0.552673	0.410523		W	0.9714	0.9814							0.0183606	0.858777		W	0.9828	0.8771
	0.514123	0.34575		P value	<0.0001	0.0755							0.100311	0.29525		P value	0.0042	<0.0001
	0.522814	0.328814		Passed normality test (alpha=0.05)?	No	Yes							0.0784364	0.32002		Passed normality test (alpha=0.05)?	No	No
	0.577964	0.47295		P value summary	****	ns							0.0797364	0.7202		P value summary	**	****
	0.471895	0.363605											0.105471	0.347295
	0.52405	0.378723											0.0932833	0.292944
	0.409909	0.472105											0.0665576	0.540129
	0.39395	0.409627											0.121983	0.405939
	0.490036	0.467509		Mann Whitney test									0.0179303	0.739558		Mann Whitney test
	0.383477	0.429868		P value	<.001								0.0863561	0.368165		P value	<.001
	0.412305	0.351918		Exact or approximate P value?	Approximate								0.0905288	0.309782		Exact or approximate P value?	Approximate
	0.446518	0.351105		P value summary	***								0.0402485	0.301462		P value summary	***
	0.368491	0.374209		Significantly different (P < 0.05)?	Yes								0.0800758	0.337158		Significantly different (P < 0.05)?	Yes
	0.403105	0.369345		One- or two-tailed P value?	Two-tailed								0.0780288	0.229621		One- or two-tailed P value?	Two-tailed
	0.406023	0.357182		Sum of ranks in column A,B	60202 , 11051								0.0426106	0.273352		Sum of ranks in column A,B	32656 , 38597
	0.420441	0.390014		Mann-Whitney U	2795								0.0858924	0.208886		Mann-Whitney U	1531
	0.441677	0.396209											0.0939894	0.201658
	0.435195	0.339027											0.155271	0.189773
	0.506918	0.430945											0.0105318	0.207621
	0.525173	0.413527											0.0182606	0.287806
	0.527091	0.432609											0.0490424	0.489491
	0.587859	0.406441											0.0325076	0.362926
	0.590041	0.367286											0.0856258	0.36088
	0.505136	0.309523											0.0406303	0.188177
	0.494605	0.392709											0.0671288	0.240524
	0.581445	0.370377											0.0138212	0.358189
	0.469391	0.40305											0.0105091	0.415117
	0.452373	0.418814											0.0772606	0.446786
	0.478105	0.410041											0.0773621	0.489859
	0.504518	0.432314											0.114515	0.261986
	0.567895	0.418327											0.0834045	0.270073
	0.433736	0.438286											0.073597	0.231414
	0.494073	0.410814											0.0849273	0.127086
	0.519609	0.406732											0.0423576	0.202835
	0.607568	0.374477											0.0932652	0.120223
	0.477895	0.425727											0.0304379	0.180406
	0.60625	0.429068											0.03325	0.124465
	0.543591	0.38825											0.0520091	0.19785
	0.575436	0.393514											0.0370303	0.106986
	0.54585	0.382095											0.0421833	0.175005
	0.587745	0.409482											0.0331212	0.182452
	0.527295	0.404059											0.0901046	0.269574
	0.504132	0.364027											0.0486682	0.122473
	0.434086	0.393132											0.0890803	0.278602
	0.475582	0.407327											0.0841849	0.102406
	0.445955	0.401077											0.0834121	0.0681227
	0.515314	0.296491											0.174186	0.158509
	0.446909	0.323605											0.0920909	0.248745
	0.458168	0.317995											0.134198	0.161871
	0.377405	0.316545											0.0871621	0.257421
	0.462641	0.318841											0.0476258	0.148659
	0.464195	0.303668											0.0767379	0.194265
	0.540482	0.327327											0.0702848	0.350306
	0.432505	0.314277											0.124395	0.143056
	0.448932	0.335986											0.135468	0.18968
	0.416218	0.381791											0.0756818	0.242809
	0.401968	0.337245											0.0830318	0.270621
	0.576755	0.374341											0.144812	0.343659
	0.535364	0.401145											0.0982864	0.143988
	0.561305	0.354082											0.0656955	0.244385
	0.566423	0.376177											0.0561273	0.284556
	0.474009	0.354723											0.0271576	0.211377
	0.489018	0.318595											0.104415	0.311938
	0.504841	0.32655											0.0585258	0.17295
	0.52895	0.341236											0.0932833	0.109864
	0.53395	0.395764											0.105117	0.0942364
	0.555259	0.349455											0.0216409	0.111279
	0.575605	0.368723											0.0406288	0.137477
	0.582641	0.331632											0.0853591	0.176168
	0.508505	0.340227											0.0280955	0.191506
	0.473159	0.335691											0.0698076	0.125409
	0.510564	0.319905											0.0600697	0.221662
	0.494782	0.351714											0.0620848	0.207553
	0.531227	0.330882											0.208006	0.245752
	0.4513	0.376555											0.0744	0.339212
	0.380186	0.334895											0.0865136	0.322555
	0.429386	0.343077											0.0783136	0.278056
	0.442277	0.343664											0.149156	0.296536
	0.486518	0.33615											0.0141818	0.2055
	0.408927	0.374855											0.100206	0.225345
	0.475718	0.381123											0.0994151	0.138344
	0.401036	0.382482											0.14593	0.140852
	0.387395	0.407723											0.0707379	0.225677
	0.502459	0.367877											0.0466076	0.248289
	0.553191	0.360936											0.0495091	0.092697
	0.495	0.370105											0.0267667	0.215162
	0.4923	0.447191											0.221833	0.522042
	0.48365	0.4455											0.151517	0.384433
	0.430886	0.431445											0.10478	0.181055
	0.481309	0.376627											0.0485242	0.259173
	0.513064	0.384232											0.176003	0.183235
	0.562132	0.399041											0.0488682	0.219526
	0.510109	0.366427											0.0430576	0.211406
	0.446023	0.42915											0.0506106	0.141117
	0.563473	0.362573											0.0333606	0.342927
	0.464409	0.388032											0.0244576	0.348202
	0.443214	0.389223											0.0646864	0.259044
	0.447832	0.306323											0.0868682	0.259444
	0.498073	0.343405											0.110694	0.282929
	0.419473	0.334559											0.120661	0.340274
	0.430232	0.354514											0.122535	0.44302
	0.380641	0.417205											0.0994258	0.239829
	0.411195	0.356464											0.0607545	0.21047
	0.563832	0.335645											0.0813015	0.176421
	0.53355	0.364473											0.100917	0.203727
	0.451427	0.349377											0.0547061	0.200156
	0.503605	0.341009											0.0463954	0.168691
	0.531655	0.357768											0.0232455	0.191482
	0.431964	0.362782											0.0712697	0.162085
	0.446973	0.303609											0.118627	0.195124
	0.4884	0.353486											0.0401333	0.22228
	0.537795	0.309759											0.0467379	0.262841
	0.513018	0.32735											0.00184848	0.409283
	0.46705	0.425718											0.0502167	0.263415
	0.464914	0.334523											0.0699197	0.416611
	0.393277	0.383823											0.188023	0.289244
	0.441918	0.486323											0.206915	0.418111
	0.483677	0.361655											0.115889	0.547079
	0.474482	0.317123											0.0154682	0.506744
	0.493795	0.3572											0.0329045	0.3298
	0.486505	0.390459											0.0446288	0.371374
	0.478332	0.370564											0.133368	0.121303
	0.450895	0.36205											0.0433545	0.306083
	0.451386	0.371486											0.0715803	0.25668
	0.433668	0.356645											0.166832	0.327905
	0.468232	0.303155											0.107768	0.275712
	0.486686	0.362											0.074047	0.214467
	0.460891	0.394136											0.00674242	0.15373
	0.450741												0.0545924
	0.446391												0.0844758
	0.487414												0.0691197
	0.509836												0.047897
	0.517282												0.101552
	0.445773												0.0643606
	0.494686												0.018547
	0.434514												0.0417197
	0.4194												0.0638667
	0.44595												0.0974167
	0.448082												0.118818
	0.388545												0.142555
	0.393605												0.0976288
	0.436641												0.175892
	0.47555												0.10205
	0.401264												0.157603
	0.461464												0.181636
	0.421327												0.161173
	0.392991												0.134176
	0.496909												0.119158
	0.375182												0.135468
	0.482764												0.039003
	0.393023												0.168277
	0.428168												0.125598
	0.393918												0.109015
	0.405159												0.0434409
	0.426068												0.112398
	0.464377												0.0547227
	0.438827												0.104739
	0.370536												0.16503
	0.555986												0.088247
	0.452868												0.108398
	0.461532												0.0269682
	0.45625												0.0418833
	0.57725												0.0304833
	0.443927												0.146573
	0.544495												0.155705
	0.603618												0.0348485
	0.464573												0.0127606
	0.473332												0.0808015
	0.53375												0.07235
	0.374091												0.0971091
	0.431195												0.130638
	0.480295												0.0308045
	0.582664												0.0875697
	0.512005												0.152895
	0.588236												0.0403303
	0.50825												0.0679833
	0.435295												0.177805
	0.465482												0.185518
	0.41975												0.181583
	0.389523												0.161477
	0.405632												0.141902
	0.3871												0.111133
	0.509614												0.0237197
	0.459591												0.0177758
	0.417473												0.0768939
	0.411577												0.0975227
	0.468373												0.0246939
	0.4736												0.110033
	0.524173												0.0707939
	0.531359												0.0907742
	0.41405												0.0659833
	0.445905												0.0990288
	0.408291												0.0744091
	0.463382												0.175285
	0.511345												0.0546212
	0.406409												0.115791
	0.511218												0.180282
	0.38505												0.10605
	0.493114												0.12332
	0.433745												0.151288
	0.537768												0.102398
	0.496459												0.160608
	0.529782												0.124852
	0.468623												0.0537439
	0.396123												0.108511
	0.383327												0.132906
	0.554991												0.156142
	0.506468												0.107165
	0.479882												0.103143
	0.572227												0.131739
	0.470436												0.0962136
	0.517614												0.178653
	0.488973												0.146361
	0.462059												0.134841
	0.405805												0.0769621
	0.454368												0.156532
	0.374045												0.110488
	0.393345												0.0972879
	0.388418												0.0940152
	0.373986												0.154414
	0.391755												0.140745
	0.391664												0.122136
	0.405568												0.0763652
	0.397873												0.100594
	0.397232												0.0732682
	0.422959												0.0939076
	0.439409												0.102658
	0.40365												0.0796833
	0.386059												0.0967409
	0.596509												0.0633909
	0.456727												0.164439
	0.523182												0.0562182
	0.484759												0.131374
	0.390336												0.126997
	0.481618												0.0863818
	0.393441												0.130892
	0.460368												0.147965
	0.38165												0.136383
	0.382305												0.121762
	0.455268												0.0905651
	0.390841												0.103726
	0.391377												0.127356
	0.398873												0.120127
	0.430736												0.102697
	0.422555												0.0694788
	0.447291												0.0738424
	0.41065												0.11285
	0.421082												0.0965515
	0.363505												0.104529
[truncated: 200 more columns]

## Sheet: Fig5 - Fig S1E
											cytoplasmic fraction
												Vinculin (1)	NFAT (1)		NFAT/VIN
											21% n1	458150	2703672		5.90128
											act1 n1	591209	2188320		3.70143
											21% n2	377485	2143464		5.67828
											act1 n2	326468	1899000		5.8168
											21% n3	452914	2374776		5.24333
											act1 n3	362117	2347032		6.48142
											21% n4	386291	2216496		5.73789
											act1 n4	302311	1626576		5.38047
											Paired t test			0.21	1%1day
											P value	0.7083		5.90128	3.70143
											P value summary	ns		5.67828	5.8168
											Significantly different (P < 0.05)?	No		5.24333	6.48142
											One- or two-tailed P value?	Two-tailed		5.73789	5.38047
											t, df	t=0.4116, df=3
											Number of pairs	4
											nuclear fraction
												H3 (1)	NFAT (1)		NFAT/H3
											21% n1	3428376	2737358	norm	0.798442
											act1 n1	2441952	3027414		1.23975
											21% n2	3770496	3400462		0.901861
											act1 n2	2047200	2887846		1.41063
											21% n5	1710648	2310490		1.35065
											act1 n5	1610376	2839070		1.76299
											21% n6	2610720	1382290		0.529467
											act1 n6	2639760	1726062		0.653871
											Paired t test			0.21	1%1day
											P value	0.022		0.798442	1.23975
											P value summary	*		0.901861	1.41063
											Significantly different (P < 0.05)?	Yes		1.35065	1.76299
											One- or two-tailed P value?	Two-tailed		0.529467	0.653871
											t, df	t=4.380, df=3
											Number of pairs	4
		relevant bands used in Fig S4J
		Additional info:
		Protein ladder: Precision Plus Protein™ Dual Color Standards (Biorad)
		Running buffer: MOPS
		Cut membrane: at 75kDa before incubation with primary and secondary antibodies
		Method od detection: ECL
