# Supplementary material for: Oxygen levels at the time of activation determine T cell persistence and immunotherapeutic efficacy
Source: eLife journal article supplement (doi:10.7554/elife.84280), 2023-05-11
Supplement: fig6-data1 [file Figure 6 - Source Data 1.xlsx]

## Sheet: Fig 6B
							0.21	1d5%	1d1%
Data summary							Resazurin absorbance values													% cytotoxicity															ELISA
	0.21	1d5%	1d1%		PC046d donor #1 #4 #5	T cell #\donor	#1	#4	#5	#1	#4	#5	#1	#4	#5					#1	#4	#5	#1	#4	#5	#1	#4	#5
[Agonist] vs. normalized response						80000	7709													97.3028																STD curve
Best-fit values						40000	7615			7583	7722		7744	7617						98.3265			98.675	97.1612		96.9216	98.3047									pg/ml
EC50	0.222	0.2275	0.156			20000	7638	7834	8378	7612	7860		7587	7632	7981	pos CT				98.076	95.9415	90.017	98.3592	95.6583		98.6314	98.1414	94.3406								2000	0.304
logEC50	-0.6536	-0.6429	-0.807			10000	8263	7678	9708	7603	7666	7830	7892	7647	8811	16643.6				91.2694	97.6404	75.5326	98.4572	97.7711	95.985	95.3098	97.978	85.3014								1000	0.29
95% CI (profile likelihood)						5000	9755	7628	12514	8050	7643	8450	8641	7622	10579	neg CT				75.0208	98.1849	44.9739	93.5891	98.0216	89.2329	87.1528	98.2503	66.047								500	0.209
EC50	0.1827 to 0.2689	0.1871 to 0.2760	0.1288 to 0.1879			2500	12919	8363		10966	9892	11525	11540	8880	13251	7461.33				40.5632	90.1804		61.8324	73.5288	55.7446	55.5812	84.55	36.9476								250	0.154
logEC50	-0.7382 to -0.5703	-0.7280 to -0.5591	-0.8902 to -0.7261				Resazurin absorbance values													% cytotoxicity																125	0.1
Goodness of Fit					PC046e donor #04 #8 #14 #15	T cell #\donor	#04	#8	#14	#15	#04	#8	#14	#15	#04	#8	#14	#15		#04	#8	#14	#15	#04	#8	#14	#15	#04	#8	#14	#15					62.5	0.071
Degrees of Freedom	56	62	54			20000	8141				8416				8434				plate1	99.3112				97.3464				97.2178								31.25	0.051
R squared	0.8453	0.807	0.8167			10000	8478	9909	9176	17028	9238	10927	8673	13997	9437	10270	8439	16639	22041.5	96.9035	87.4504	92.3843	39.5317	91.4737	80.5982	95.7701	59.9337	90.052	85.0205	97.3451	38.5978					15.625	0.043
Sum of Squares	10661	13202	8591			5000	9282	14760	12044	18230	11669	14009	11283	17038	12235	12729	11039	18153	8044.58	91.1594	54.7979	73.0795	31.441	74.1056	59.8529	78.2019	39.4644	70.0619	68.4687	79.8443	27.7811					7.8125	0.034
Sy.x	13.8	14.59	12.61			2500	15581	18514	18141	19429	17246	18067	17066	19358	16195	17876	17229	19364	plate2	46.1566	29.5293	32.04	23.3704	34.2611	32.5381	39.276	23.8483	41.7699	33.8238	38.1788	19.1292					3.90625	0.031
Constraints						1250	18360	19168	20101	19616	19490	19451	18844	21016	19206	18270	19419	18294	22901	26.3022	25.1272	18.8471	22.1117	18.229	23.2223	27.3081	12.6881	20.258	31.1717	23.4377	26.7738					1.95312	0.031
EC50	EC50 > 0	EC50 > 0	EC50 > 0			625	18529				18658				19483				8044.58	25.0948				24.1732				18.279								0	0.038
							Resazurin absorbance values													% cytotoxicity
Number of points					PC046f donor #03 #9	T cell #\donor	#3	#9	#3	#9	#3	#9								#3	#9	#3	#9	#3	#9
# of X values	130	130	130			20000	8015		7877		7857									97.0389		99.3607		99.6972
# Y values analyzed	57	63	55			10000	8582		9210		7889		plate1							87.4994		76.9336		99.1588														1:2 ET ratio	IFNg (pg/ml)
	EC50 values (E:T ratio)					5000	9820	14201	9518	13772	8277	12688	13782.7							66.6706	17.2425	71.7516	22.8463	92.6309	37.0061												21% n1	0.065	179.4		Shapiro-Wilk test	0.21	1%1day
	0.21	1d5%	1d1%			2500	10925	14383	12415	13987	10099	13260	7839							48.0795	14.8651	23.0109	20.0379	61.9765	29.5343												21% n2	0.042	41.4		W	0.824	0.9561
PC046d	0.2158	0.09667	0.1307			1250	12737	14929	12859	14378	10902	13918	plate2							17.5934	7.733	15.5408	14.9304	48.4664	20.9392												21% n3	0.066	185.4		P value	0.0956	0.7893
	0.02395	0.06234	0.03527			625	14821	15273	13924	15064	12173	14389	15521							-17.4689	3.2395	-2.37731	5.96956	27.0825	14.7868												21% n4	0.062	161.4		Passed normality test (alpha=0.05)?	Yes	Yes
	0.4264	0.1284	0.2826			312.5	14967	15135	12711	14972	11779	14759	7865.5							-19.9253	5.04213	18.0309	7.17131	33.7113	9.95363												21% n5	0.067	191.4		P value summary	ns	ns
PC046e	0.1875	0.2736	0.2711			156.25	13504	15576	12441	14992	11641	14268								4.689	-0.718438	22.5735	6.91006	36.0331	16.3673												21% n6	0.054	113.4
	0.3776	0.3732	0.2953				Resazurin absorbance values													% cytotoxicity																	1% n1	0.107	431.4		Paired t test
	0.304	0.2378	0.2438		PC046g donor #07 #16 #17	T cell #\donor	#7	#16	#17	#7	#16	#17	#7	#16	#17					#7	#16	#17	#7	#16	#17	#7	#16	#17									1% n2	0.092	341.4		P value	0.0019
	1.113	0.7438	1.229			20000		8097	7860		8333	7789									94.8405	97.0339		92.6564	97.6909												1% n3	0.138	617.4		P value summary	**
PC046f	0.3549	0.3753	0.09894			10000		8321	8129		8570	8854		8396	7798						92.7674	94.5443		90.463	87.8347		92.0733	97.6077									1% n4	0.117	491.4		Significantly different (P < 0.05)?	Yes
	1.959	1.246	0.6255			5000	11681	9701	9385	11649	9649	10586	10155	9144	8552	plate1				55.0734	79.9959	82.9204	55.4241	80.4772	71.8055	71.7949	85.1508	90.6296									1% n5	0.122	521.4		One- or two-tailed P value?	Two-tailed
PC046g	0.2959	0.2427	0.1951			2500	12464	11752	11683	12428	11211	12389	11296	10874	10515	16707				46.4935	61.0145	61.6531	46.888	66.0213	55.1192	59.2921	69.1401	72.4626									1% n6	0.17	809.4		t, df	t=5.930, df=5
	0.1461	0.1189	0.09409			1250	13628	13671	13842	12899	12959	13889	13493	12592	12586	7581				33.7388	43.2547	41.6721	41.7269	49.8441	41.2372	35.2181	53.2405	53.2961													Number of pairs	6
	0.1463	0.1623	0.09672			625	14402	15032	15492	14095	14681	14838	15231	14011	14288	plate2				25.2575	30.659	26.4019	28.6215	33.9074	32.4544	16.1736	40.1081	37.5445
	outlier determined with ROUT method (Q=1%)					312.5	16377	16705	16466	15587	16010	16272	14677	15190	15911	18344.8				3.61604	15.1759	17.3878	12.2726	21.6079	19.1832	22.2441	29.1968	22.5241
Normality test						156.25	15907	17012	17090	15464	16279	16538	15159	16272		7539.5				8.76616	12.3347	11.6128	13.6204	19.1184	16.7214	16.9625	19.1832
Shapiro-Wilk test
W	0.8589	0.8447	0.8348
P value	0.0741	0.0651	0.0506
Passed normality test (alpha=0.05)?	Yes	Yes	Yes
P value summary	ns	ns	ns		2158	966.7
Statistical analysis					239.5	623.4
Paired t test vs 21%					4264	1284
P value		0.286	0.0291		1875	2736
P value summary		ns	*		3776	3732
Significantly different (P < 0.05)?		No	Yes		3040	2378
One- or two-tailed P value?		Two-tailed	Two-tailed
t, df		t=1.143, df=8	t=2.593, df=9		3549	3753
Number of pairs		9	10
					2959	2427
					1461	1189
					1463	1623

## Sheet: Fig 6C
		Control				Last 3 days hypoxic CAR-T cells								1 day hypoxic T cells								First 3 days hypoxic CAR-T cells
		0.21				0.05				0.01				5% 1day				1% 1 day				0.05				0.01
	E:T ratio\donor	110	111	121	121	110	111	120	121	110	111	120	121	110	111	120	121	110	111	120	121	110	111	120	121	110	111	120	121
RQR8-CD19 CAR (RAJi counts)	1	920.042	1554.03	7458.87	8940.53	210.532	914.667	3759.34	2240.1	1147.33	355.097	1778.96	374.277	1074.07	636.865	2706.22	904.997	695.925	501.862	1769.36	954.849	774.843	204.397	656.769	889.214	4345.06	7012.4	1346.94				EC50			Cytotoxicity assay with CD19 CAR T cells
	0.5	4057.64	7241.93	12070.7	7323.62	1424.78	4162.99	9032.68	4037.05	3697.39	3474.25	4781.75	872.727	3334.29	3985.41	5086.92	2744.77	2811.7	2688.89	3308.59	1782.75	2578.48	1081.49	1440.62	1207.1	8780.97	10435.5	3991.7	725.441		Donor	0.21	1%1day		LK010c (E:T ratio = 0.5)		0.21		5%1d		1%1d
	0.25	6115.24	12367.6	14208	14925	3815.63	6649.11	13913.3	7187.6	5374.56	7119.17	10329.5	4492.18	6349.91	8390.95	7039.27	4623.82	4589.78	5749.28	6215.03	4569.9	6389.24	3024.88	2295.77	1727.43	11736.7	14521.9	4571.72	1906.9		110	0.4826	0.1153		donor		110	111	110	111	110	111
	0.125	12609.2	16148.7	16944.1	17708.2	5169.44	7337.09	13850.1	11750.4	6286.27	7487.91	13943.2	10049	7034.42	10256.7	9545.72	7188.25	6402.81	8614.41	8194.14	7418.37	9729.6	5655.1	3531.16	3061.42	11033.8	12534.1	8615.76	3072.28		111	0.7489	0.06146		RAJI counts	CD19 CAR	4817.42	8722.3	3965	4724.35	3396.66	3048.89
Vector control (RAJi counts)	1	4367.85	6963.64	14135	12144.5	2094.2	2804.65	11024.2	7590.46	3432.67	7737.14	7409.18	4021.2	2391.54	5713.88	8072.27	6500.38	6253.53	9509.29	13798.4	6820.8	4724.01	3210.34	1415.64	1493.6	10057.1	16623.6	1964.21	1981.29		120	1.106	0.2028			VC (RQR8 alone)	11456.5	18156.7	5839.12	13345.1	13040.3	24814.5
	0.5	7062.35	11087.1	14758.9	14654.4	4977.03	5661.02	13030.5	9713.29	5858.51	9843.39	12774.6	8161.31	3662.57	8978.65	10430.3	9505.36	9929.33	19882.6	14694.4	13081.9	8374.55	7936.55	1483.83	2098.52	13193.2	21547.6	3191.89	3444.92		121	1.745	0.153		%cytotox		57.9503	51.9609	32.096	64.5987	73.9527	87.7133
	0.25	9844.71	13219.7	20740.7	13868.3	6798.58	8940.64	17144.3	14256.3	8396.74	11942.1	17663.3	14285.6	6330.02	12584.4	9521	5062.19	12829.6	24071.2	13682.4	13505.6	13384.8	13922.7	1520.32	5558.25	17406.5	25109.9	4249.6	4476.72
	0.125	14446.1	18409.6	21087.6	18148.8	8274.03	11078.5	17115.7	12176.6	14825.5	16104.8	17572.9	15482.3	11631.3	16432.6	13172.3	9470.93	16771	29722.1	11858.8	11286.1	17308.6	23100	2387.18	6960.98	20530.1	27103.3	5443.66	6257.94		Shapiro-Wilk test				LK010d (E:T ratio = 0.5)		0.21		5%1d		1%1d
% Cytotox	1	78.9361	77.6837	47.2312	26.3822	89.9469	67.3875	65.8993	70.4879	66.5761	95.4105	75.9898	90.6924	55.0887	88.8541	66.475	86.0778	88.8715	94.7224	87.177	86.0009	83.5978	93.6332	53.6064	40.4651	56.7962	57.8167	31.4259			W	0.9597	0.9991		donor		120	121	120	121	120	121
	0.5	42.5454	34.6812	18.2142	50.0245	71.373	26.4622	30.6807	58.4379	36.8885	64.7048	62.5684	89.3065	8.9632	55.6123	51.2295	71.124	71.6829	86.4762	77.4839	86.3725	69.2105	86.3733	2.91204	42.4785	33.4432	51.5699	-25.0573	78.9417		P value	0.7772	0.9973		RAJI counts	CD19 CAR	14056.5	12163.8	7121.69	4063.6	4048.36	2357.83
	0.25	37.883	6.44542	31.497	-7.6193	43.876	25.6305	18.8464	49.5831	35.9923	40.3858	41.5197	68.5545	-0.314165	33.3228	26.0659	8.65972	64.2251	76.1155	54.5764	66.1628	52.2648	78.2737	-51.0056	68.9213	32.5726	42.1668	-7.58006	57.4041		Passed normality test (alpha=0.05)?	Yes	Yes			VC (RQR8 alone)	20421.1	19688.4	12190.5	11299.7	16335.3	14768.9
	0.125	12.7153	12.2814	19.649	2.4275	37.5221	33.7719	19.0798	3.50015	57.5981	53.5051	20.6555	35.0938	39.5217	37.5833	27.532	24.102	61.8221	71.0168	30.9026	34.2699	43.7875	75.519	-47.9219	56.0203	46.2554	53.7544	-58.2716	50.9059		P value summary	ns	ns		%cytotox		31.1668	38.2186	41.5799	64.0379	75.2171	84.0352
																															Paired t test
																															P value	0.0417
	ELISA																														P value summary	*
	IFNg (pg/ml)																														Significantly different (P < 0.05)?	Yes
	0.21	1d5%	1d1%																												One- or two-tailed P value?	Two-tailed
	18.8724	20.3561	26.2908																												t, df	t=3.425, df=3
	0	9.67359	27.181																												Number of pairs	4
	3.21503	6.76409	13.8622
	7.49478	21.7954	20.9603
Normality test
Shapiro-Wilk test
W	0.9181	0.8594	0.8958
P value	0.5264	0.2581	0.4103
Passed normality test (alpha=0.05)?	Yes	Yes	Yes
P value summary	ns	ns	ns
Statistical analysis
P value vs 21%		0.0892	0.0432
P value summary		ns	*
Significantly different (P < 0.05)?		No	Yes
One- or two-tailed P value?		Two-tailed	Two-tailed
t, df		t=2.481, df=3	t=3.377, df=3
Number of pairs		4	4

## Sheet: Fig 6E-F
					RQR8+	% of RQR8+	cells/ml of blood	cells/ml of blood	cells/ml of blood			RQR8+ counts per ml of blood			%CD45RO+CCR7-
Sample:		beads counts	mouse CD45 counts	human CD45 counts	count	CCR7- , CD45RO+	mouse CD45	human CD45	RQR8+			21%O2	1d 1%O2		21%O2	1d 1%O2
PC075b_A0_001.fcs	Act1%	6325	13408	3415	47	55.3	540560	137680	1894.86			0	1894.86		0	55.3
PC075b_A2_003.fcs	CT	6310	10350	626	8	50	418265	25297.9	323.296			323.3	595.87		50	47.4
PC075b_A3_004.fcs	NoT	6289	7046	1	0	0	285694	40.547	0			41	443.42		0	64.3
PC075b_B1_005.fcs	CT	6066	2551	0	0	0	107238	0	0			837.59	382.79		37	50
PC075b_B2_006.fcs	CT	6220	5188	114	1	0	212691	4673.63	40.9968			653.69	1378.56		59.1	42.5
PC075b_C1_008.fcs	NoT	6503	2910	1	0	0	114109	39.2127	0			0			0
PC075b_D0_011.fcs	Act1%	8131	4985	1361	19	47.4	156337	42682.9	595.868			170.87			20
PC075b_D2_013.fcs	NoT	8642	6063	31	1	0	178901	914.719	29.5071			89.39			0
PC075b_D3_014.fcs	CT	8220	14407	1209	27	37	446932	37505.5	837.591			301.81			44.4
PC075b_D4_015.fcs	CT	8582	21561	1841	22	59.1	640650	54702.3	653.694			21%O2	1d 1%O2		21%O2	1d 1%O2
PC075b_E1_017.fcs	CT	7549	10379	17	0	0	350595	574.248	0		Shapiro-Wilk test
PC075b_E2_018.fcs	NoT	6082	4177	0	0	0	175129	0	0		W	0.8548	0.8511		0.8336	0.9686
PC075b_E3_019.fcs	Act1%	8051	2740	543	14	64.3	86784.3	17198.5	443.423		P value	0.0842	0.198		0.049	0.8662
PC075b_E4_020.fcs	CT	7462	5196	319	5	20	177564	10901.2	170.866		Passed normality test (alpha=0.05)?	Yes	Yes		No	Yes
PC075b_F0_021.fcs	CT	8558	5451	79	3	0	162422	2353.94	89.39		P value summary	ns	ns		*	ns
PC075b_F1_022.fcs	NoT	7957	4939	16	2	0	158281	512.756	64.0945			21%O2	1d 1%O2		21%O2	1d 1%O2
PC075b_F2_023.fcs	Act1%	7994	3830	1174	12	50	122173	37449.3	382.787		Mann Whitney test vs 21%
PC075b_F3_024.fcs	CT	7604	7019	960	9	44.4	235382	32193.6	301.815		P value		0.028			0.0415
PC075b_F4_025.fcs	Act1%	7399	9124	1679	40	42.5	314451	57865.3	1378.56		Exact or approximate P value?		Exact			Exact
											P value summary		*			*
								40uL of blood analysed			Significantly different (P < 0.05)?		Yes			Yes
								10200 beads added per well			One- or two-tailed P value?		Two-tailed			Two-tailed
											Sum of ranks in column A,B		51 , 54			52.50 , 52.50
											Mann-Whitney U		6			7.5
												RQR8+ counts per ml of blood			%CD45RO+CCR7-

## Sheet: Fig 6G-H
Tumour volume summary
		HER2_21									HER2_1						Noact
	day0= ACT	NSG67	NSG71	NSG72	NSG83	NSG84	NSG86	NSG89	NSG90	NSG93	NSG65	NSG80	NSG88	NSG92	NSG94		NSG76	NSG82	NSG87	NSG91		Exponential (Malthusian) growth	21% DMSO CT	NoACT	1%1day DMSO
	-22	0	0	0	0	0	0	0	0	0	0	0	0	0	0		0	0	0	0		Best-fit values
	-14	29.7	32.2	30	45.6	13.5	27.4	13.5	19.7	22.7	38.8	22	27	13.5	28.5		33.7	27.9	18.4	20.1		Y0	163.6	135.1	132.1
	-4	115.4	83.8	190.1	132.9	79.3	63.6	6.1	14.1	23.9	150.3	70.3	16	14	13.5		42.3	27.4	108	42		k	0.1222	0.1746	0.03007
	-1	202.5	159	472.4	384.6	196	122.3	9.9	12.9	87.3	229.1	224.3	19.8	19.7	27.4		205.2	50.4	171.1	115.3		DoublingTime	5.672	3.971	23.05
T CELLS	0
	1	165.5	268.6	636.5	433.7	323.5	184.6	18	37	158.1	278.4	249	46.4	31.5	29.7		300.8	72.9	245.1	148.8
	3	223.8	279.3	1001	585.2	576.4	254.6	17.1	129.6	299.9	433.2	529.9	64.1	21.5	29.7		371.7	54	371.2	243.6		Comparison of Survival Curves
	5	260.1	311.9		575.1	1062.1	320.3	23.9	190.4	281.6	458.4	665.9	76.3	45.9	28.7		615.3	93.6	420.3	289.7
	7	356.3	410.4		1083.3		441	34.5	239.8	528.2	522.2	955.4	219.7	48.7	33.5		796.5	185.9	558.4	412.5		Log-rank (Mantel-Cox) test
	9	374	317.7				491.8	32.7	344.4	522.2	629.2	1171.3	292.4	34.5	57.4		1261.3	174.9	681.4	568.6		Chi square	4.245
	11	367.4	329.1				785	55.3	288	590	555.1		244.7	41.5	30.4			292.4	777.9	675		df	1
	13	483.2	413.7				1239.1	43.7	721.3	1054.2	514.4		202.4	48.7	41.2			379.7	1097.7	1011.7		P value	0.0394
	16	778.5	1005.1					28.2	2097.7		701		421.6	32.5	83.1			1154.1				P value summary	*
	19							65.7					705.5	25.9	26.7							Are the survival curves sig different?	Yes
	21							95.6					767.1	55	109.8
	23							247.5					1137.8	53	81.6							Gehan-Breslow-Wilcoxon test
	26							231						22.1	70.8							Chi square	3.299
	28							257.1						63.4	71.7							df	1
	30							427.4						58.7	54.1							P value	0.0693
	33							380.7						56.1	33.2							P value summary	ns
	35							510.3						64.5	33.2							Are the survival curves sig different?	No
	37							583						64.5	33.2
	40							870						44.1	0							Median survival
		HER2_21									HER2_1						Noact					CAR_21	11
Survival analysis																						CAR_1	18
	700mm3	15	14	1	5	3	10	38	12	11	16	5	18	33	33		6	14	9	11		Ratio (and its reciprocal)	0.6111
	21 DMSO CT	1	1	1	1	1	1	1	1	1	1	1	1	0	0							95% CI of ratio	0.1654 to 2.257
	FG										1	1	1	0	0
	NoACT																1	1	1	1		Hazard Ratio (Mantel-Haenszel)	A/B
																						Ratio (and its reciprocal)	3.519
Raw data																						95% CI of ratio	1.063 to 11.65
	#	Ear#	Cage	Date	Age (w)	Day (0=tumor injection)	Day (0=ACT)	Group	Auto-ID	Cage-ID		Weight	Tumor (a)	Tumor (b)		Weight change (%)	Tumor vol (mm3)
NSG65	1	0	A	2022-03-01	7	0	-22		524677	218780			0	0			0					Hazard Ratio (logrank)	A/B
NSG66	2	1	A	2022-03-01	7	0	-22		524678	218780			0	0			0					Ratio (and its reciprocal)	3.399
NSG67	3	2	A	2022-03-01	7	0	-22		524679	218780			0	0			0					95% CI of ratio	1.094 to 10.56
NSG68	4	3	A	2022-03-01	7	0	-22		524680	218780			0	0			0
NSG69	5	4	A	2022-03-01	7	0	-22		524681	218780			0	0			0
NSG70	6	0	B	2022-03-01	7	0	-22		524682	218781			0	0			0
NSG71	7	1	B	2022-03-01	7	0	-22		524683	218781			0	0			0
NSG72	8	2	B	2022-03-01	7	0	-22		524684	218781			0	0			0
NSG73	9	3	B	2022-03-01	7	0	-22		524685	218781			0	0			0
NSG74	10	4	B	2022-03-01	7	0	-22		524686	218781			0	0			0
NSG75	11	0	C	2022-03-01	7	0	-22		524687	218782			0	0			0
NSG76	12	1	C	2022-03-01	7	0	-22		524688	218782			0	0			0
NSG77	13	2	C	2022-03-01	7	0	-22		524689	218782			0	0			0
NSG78	14	3	C	2022-03-01	7	0	-22		524690	218782			0	0			0
NSG79	15	4	C	2022-03-01	7	0	-22		524691	218782			0	0			0
NSG80	16	0	D	2022-03-01	7	0	-22		524692	218783			0	0			0
NSG81	17	1	D	2022-03-01	7	0	-22		524693	218783			0	0			0
NSG82	18	2	D	2022-03-01	7	0	-22		524694	218783			0	0			0
NSG83	19	3	D	2022-03-01	7	0	-22		524695	218783			0	0			0
NSG84	20	4	D	2022-03-01	7	0	-22		524696	218783			0	0			0
NSG85	21	0	E	2022-03-01	7	0	-22		524697	218784			0	0			0
NSG86	22	1	E	2022-03-01	7	0	-22		524698	218784			0	0			0
NSG87	23	2	E	2022-03-01	7	0	-22		524699	218784			0	0			0
NSG88	24	3	E	2022-03-01	7	0	-22		524700	218784			0	0			0
NSG89	25	4	E	2022-03-01	7	0	-22		524701	218784			0	0			0
NSG90	26	0	F	2022-03-01	7	0	-22		524702	218785			0	0			0
NSG91	27	1	F	2022-03-01	7	0	-22		524703	218785			0	0			0
NSG92	28	2	F	2022-03-01	7	0	-22		524704	218785			0	0			0
NSG93	29	3	F	2022-03-01	7	0	-22		524705	218785			0	0			0
NSG94	30	4	F	2022-03-01	7	0	-22		524706	218785			0	0			0
NSG65	1	0	A	2022-03-09	8.14286	8	-14	Act1%	524677	218780	21.5	21.5	4.4	4.2		0	38.808
NSG67	3	2	A	2022-03-09	8.14286	8	-14	CT	524679	218780	22	22	3.9	3.9		0	29.6595
NSG68	4	3	A	2022-03-09	8.14286	8	-14	NoT	524680	218780	19.9	19.9	3.2	3.2		0	16.384
NSG69	5	4	A	2022-03-09	8.14286	8	-14		524681	218780	22.6	22.6	4.5	3.7		0	30.8025
NSG70	6	0	B	2022-03-09	8.14286	8	-14		524682	218781	21.4	21.4	0	0		0	0
NSG71	7	1	B	2022-03-09	8.14286	8	-14	NoT	524683	218781	20.9	20.9	3.7	3.3		0	20.1465
NSG72	8	2	B	2022-03-09	8.14286	8	-14	CT	524684	218781	22.7	22.7	4.9	3.5		0	30.0125
NSG73	9	3	B	2022-03-09	8.14286	8	-14		524685	218781	21.3	21.3	4.2	3.8		0	30.324
NSG74	10	4	B	2022-03-09	8.14286	8	-14		524686	218781	21.9	21.9	4.4	4.4		0	42.592
NSG76	12	1	C	2022-03-09	8.14286	8	-14	NoT	524688	218782	22.8	22.8	4.7	3.7		0	32.1715
NSG79	15	4	C	2022-03-09	8.14286	8	-14		524691	218782	23.5	23.5	4.6	4.3		0	42.527
NSG80	16	0	D	2022-03-09	8.14286	8	-14	Act1%	524692	218783	16.6	16.6	3.8	3.4		0	21.964
NSG82	18	2	D	2022-03-09	8.14286	8	-14	NoT	524694	218783	18.7	18.7	5.5	3.5		0	33.6875
NSG83	19	3	D	2022-03-09	8.14286	8	-14	CT	524695	218783	18.7	18.7	5.7	4		0	45.6
NSG84	20	4	D	2022-03-09	8.14286	8	-14	CT	524696	218783	18.9	18.9	3	3		0	13.5
NSG86	22	1	E	2022-03-09	8.14286	8	-14	CT	524698	218784	19.7	19.7	4	3.7		0	27.38
NSG87	23	2	E	2022-03-09	8.14286	8	-14	NoT	524699	218784	18.9	18.9	4.3	3.6		0	27.864
NSG88	24	3	E	2022-03-09	8.14286	8	-14	Act1%	524700	218784	20.5	20.5	4.4	3.5		0	26.95
NSG89	25	4	E	2022-03-09	8.14286	8	-14	CT	524701	218784	21.7	21.7	3	3		0	13.5
NSG90	26	0	F	2022-03-09	8.14286	8	-14	CT	524702	218785	19.7	19.7	3.4	3.4		0	19.652
NSG91	27	1	F	2022-03-09	8.14286	8	-14	NoT	524703	218785	19.4	19.4	3.6	3.2		0	18.432
NSG92	28	2	F	2022-03-09	8.14286	8	-14	Act1%	524704	218785	22.9	22.9	3	3		0	13.5
NSG93	29	3	F	2022-03-09	8.14286	8	-14	CT	524705	218785	17.6	17.6	3.7	3.5		0	22.6625
NSG94	30	4	F	2022-03-09	8.14286	8	-14	Act1%	524706	218785	23.6	23.6	4.4	3.6		0	28.512
NSG65	1	0	A	2022-03-19	9.57143	18	-4	Act1%	524677	218780	21.5	21	6.9	6.6		-2.32558	150.282
NSG67	3	2	A	2022-03-19	9.57143	18	-4	CT	524679	218780	22	22.3	6.2	6.1		1.36364	115.351
NSG68	4	3	A	2022-03-19	9.57143	18	-4	NoT	524680	218780	19.9	21	2.6	2.6		5.52764	8.788
NSG69	5	4	A	2022-03-19	9.57143	18	-4		524681	218780	22.6	24	9.1	8.9		6.19469	360.406
NSG70	6	0	B	2022-03-19	9.57143	18	-4		524682	218781	21.4	23.1	10.5	8.2		7.94393	353.01
NSG71	7	1	B	2022-03-19	9.57143	18	-4	NoT	524683	218781	20.9	21.6	5	4.1		3.34928	42.025
NSG72	8	2	B	2022-03-19	9.57143	18	-4	CT	524684	218781	22.7	23.8	9	6.5		4.84581	190.125
NSG73	9	3	B	2022-03-19	9.57143	18	-4		524685	218781	21.3	22.5	8.8	7.7		5.6338	260.876
NSG74	10	4	B	2022-03-19	9.57143	18	-4		524686	218781	21.9	22.8	12.3	9		4.10959	498.15
NSG76	12	1	C	2022-03-19	9.57143	18	-4	NoT	524688	218782	22.8	23.6	6.2	5.2		3.50877	83.824
NSG79	15	4	C	2022-03-19	9.57143	18	-4		524691	218782	23.5	24.3	9.6	7.8		3.40426	292.032
NSG80	16	0	D	2022-03-19	9.57143	18	-4	Act1%	524692	218783	16.6	18.7	5.2	5.2		12.6506	70.304
NSG82	18	2	D	2022-03-19	9.57143	18	-4	NoT	524694	218783	18.7	19.8	4.8	4.2		5.88235	42.336
NSG83	19	3	D	2022-03-19	9.57143	18	-4	CT	524695	218783	18.7	19.9	7.9	5.8		6.41711	132.878
NSG84	20	4	D	2022-03-19	9.57143	18	-4	CT	524696	218783	18.9	20.3	6.1	5.1		7.40741	79.3305
NSG86	22	1	E	2022-03-19	9.57143	18	-4	CT	524698	218784	19.7	21.2	5.3	4.9		7.61421	63.6265
NSG87	23	2	E	2022-03-19	9.57143	18	-4	NoT	524699	218784	18.9	20.2	3.8	3.8		6.87831	27.436
NSG88	24	3	E	2022-03-19	9.57143	18	-4	Act1%	524700	218784	20.5	21	4.4	2.7		2.43902	16.038
NSG89	25	4	E	2022-03-19	9.57143	18	-4	CT	524701	218784	21.7	23	2.3	2.3		5.99078	6.0835
NSG90	26	0	F	2022-03-19	9.57143	18	-4	CT	524702	218785	19.7	20.5	3.6	2.8		4.06091	14.112
NSG91	27	1	F	2022-03-19	9.57143	18	-4	NoT	524703	218785	19.4	20.3	6	6		4.63918	108
NSG92	28	2	F	2022-03-19	9.57143	18	-4	Act1%	524704	218785	22.9	23.6	3.1	3		3.05677	13.95
NSG93	29	3	F	2022-03-19	9.57143	18	-4	CT	524705	218785	17.6	18.1	3.9	3.5		2.84091	23.8875
NSG94	30	4	F	2022-03-19	9.57143	18	-4	Act1%	524706	218785	23.6	25.3	3	3		7.20339	13.5
NSG65	1	0	A	2022-03-22	10	21	-1	Act1%	524677	218780	21.5	20.8	8.6	7.3		-3.25581	229.147
NSG67	3	2	A	2022-03-22	10	21	-1	CT	524679	218780	22	22	7.6	7.3		0	202.502
NSG68	4	3	A	2022-03-22	10	21	-1	NoT	524680	218780	19.9	21.3	3.3	3.3		7.03518	17.9685
NSG69	5	4	A	2022-03-22	10	21	-1		524681	218780	22.6	24.2	13.8	11.5		7.07965	912.525
NSG70	6	0	B	2022-03-22	10	21	-1		524682	218781	21.4	23.9	13.1	11		11.6822	792.55
NSG71	7	1	B	2022-03-22	10	21	-1	NoT	524683	218781	20.9	21.5	7.1	5.7		2.87081	115.34
NSG72	8	2	B	2022-03-22	10	21	-1	CT	524684	218781	22.7	23.6	12.2	8.8		3.96476	472.384
NSG73	9	3	B	2022-03-22	10	21	-1		524685	218781	21.3	22.2	13.1	11.3		4.22535	836.37
NSG74	10	4	B	2022-03-22	10	21	-1		524686	218781	21.9	21.3	14	10.9		-2.73973	831.67
NSG76	12	1	C	2022-03-22	10	21	-1	NoT	524688	218782	22.8	22.4	7.3	6.6		-1.75439	158.994
NSG79	15	4	C	2022-03-22	10	21	-1		524691	218782	23.5	25	13.4	11		6.38298	810.7
NSG80	16	0	D	2022-03-22	10	21	-1	Act1%	524692	218783	16.6	18.6	8.9	7.1		12.0482	224.324
NSG82	18	2	D	2022-03-22	10	21	-1	NoT	524694	218783	18.7	19.5	7.7	7.3		4.27807	205.166
NSG83	19	3	D	2022-03-22	10	21	-1	CT	524695	218783	18.7	20.7	10.9	8.4		10.6952	384.552
NSG84	20	4	D	2022-03-22	10	21	-1	CT	524696	218783	18.9	20.2	8	7		6.87831	196
NSG86	22	1	E	2022-03-22	10	21	-1	CT	524698	218784	19.7	22.5	7.8	5.6		14.2132	122.304
NSG87	23	2	E	2022-03-22	10	21	-1	NoT	524699	218784	18.9	20.7	6.3	4		9.52381	50.4
NSG88	24	3	E	2022-03-22	10	21	-1	Act1%	524700	218784	20.5	21	4.7	2.9		2.43902	19.7635
NSG89	25	4	E	2022-03-22	10	21	-1	CT	524701	218784	21.7	23	4.1	2.2		5.99078	9.922
NSG90	26	0	F	2022-03-22	10	21	-1	CT	524702	218785	19.7	20.7	3.3	2.8		5.07614	12.936
NSG91	27	1	F	2022-03-22	10	21	-1	NoT	524703	218785	19.4	21.2	8.9	6.2		9.27835	171.058
NSG92	28	2	F	2022-03-22	10	21	-1	Act1%	524704	218785	22.9	23.3	3.4	3.4		1.74672	19.652
NSG93	29	3	F	2022-03-22	10	21	-1	CT	524705	218785	17.6	18.3	7.9	4.7		3.97727	87.2555
NSG94	30	4	F	2022-03-22	10	21	-1	Act1%	524706	218785	23.6	25	3.8	3.8		5.9322	27.436
NSG65	1	0	A	2022-03-24	10.2857	23	1	Act1%	524677	218780	21.5	21.5	8.7	8		0	278.4
NSG67	3	2	A	2022-03-24	10.2857	23	1	CT	524679	218780	22	22.5	7.6	6.6		2.27273	165.528
NSG68	4	3	A	2022-03-24	10.2857	23	1	NoT	524680	218780	19.9	21.2	3.7	3.7		6.53266	25.3265
NSG69	5	4	A	2022-03-24	10.2857	23	1		524681	218780	22.6
NSG70	6	0	B	2022-03-24	10.2857	23	1		524682	218781	21.4
NSG71	7	1	B	2022-03-24	10.2857	23	1	NoT	524683	218781	20.9	22.4	7.5	6.3		7.17703	148.838
NSG72	8	2	B	2022-03-24	10.2857	23	1	CT	524684	218781	22.7	24.5	12	10.3		7.92952	636.54
NSG73	9	3	B	2022-03-24	10.2857	23	1		524685	218781	21.3
NSG74	10	4	B	2022-03-24	10.2857	23	1		524686	218781	21.9
NSG76	12	1	C	2022-03-24	10.2857	23	1	NoT	524688	218782	22.8	23.4	9.3	7.6		2.63158	268.584
NSG79	15	4	C	2022-03-24	10.2857	23	1		524691	218782	23.5
NSG80	16	0	D	2022-03-24	10.2857	23	1	Act1%	524692	218783	16.6	19.7	8.4	7.7		18.6747	249.018
NSG82	18	2	D	2022-03-24	10.2857	23	1	NoT	524694	218783	18.7	20	9.4	8		6.95187	300.8
NSG83	19	3	D	2022-03-24	10.2857	23	1	CT	524695	218783	18.7	21.5	11.2	8.8		14.9733	433.664
NSG84	20	4	D	2022-03-24	10.2857	23	1	CT	524696	218783	18.9	20.6	11.2	7.6		8.99471	323.456
NSG86	22	1	E	2022-03-24	10.2857	23	1	CT	524698	218784	19.7	22.2	9.3	6.3		12.6904	184.559
NSG87	23	2	E	2022-03-24	10.2857	23	1	NoT	524699	218784	18.9	20.8	6.6	4.7		10.0529	72.897
NSG88	24	3	E	2022-03-24	10.2857	23	1	Act1%	524700	218784	20.5	21	5.8	4		2.43902	46.4
NSG89	25	4	E	2022-03-24	10.2857	23	1	CT	524701	218784	21.7	23.7	3.3	3.3		9.21659	17.9685
NSG90	26	0	F	2022-03-24	10.2857	23	1	CT	524702	218785	19.7	20.8	4.2	4.2		5.58376	37.044
NSG91	27	1	F	2022-03-24	10.2857	23	1	NoT	524703	218785	19.4	22.2	10.6	6.8		14.433	245.072
NSG92	28	2	F	2022-03-24	10.2857	23	1	Act1%	524704	218785	22.9	23.5	4.6	3.7		2.62009	31.487
NSG93	29	3	F	2022-03-24	10.2857	23	1	CT	524705	218785	17.6	18.1	8.5	6.1		2.84091	158.142
NSG94	30	4	F	2022-03-24	10.2857	23	1	Act1%	524706	218785	23.6	25.1	3.9	3.9		6.35593	29.6595
NSG65	1	0	A	2022-03-26	10.5714	25	3	Act1%	524677	218780	21.5	21.5	9.6	9.5		0	433.2
NSG67	3	2	A	2022-03-26	10.5714	25	3	CT	524679	218780	22	22.1	8.4	7.3		0.454545	223.818
NSG68	4	3	A	2022-03-26	10.5714	25	3	NoT	524680	218780	19.9	21	4.9	4.7		5.52764	54.1205
NSG69	5	4	A	2022-03-26	10.5714	25	3		524681	218780	22.6
NSG70	6	0	B	2022-03-26	10.5714	25	3		524682	218781	21.4
NSG71	7	1	B	2022-03-26	10.5714	25	3	NoT	524683	218781	20.9	22.3	9.4	7.2		6.69856	243.648
NSG72	8	2	B	2022-03-26	10.5714	25	3	CT	524684	218781	22.7	24.7	13.4	12.2		8.81057	997.228
NSG73	9	3	B	2022-03-26	10.5714	25	3		524685	218781	21.3
NSG74	10	4	B	2022-03-26	10.5714	25	3		524686	218781	21.9
NSG76	12	1	C	2022-03-26	10.5714	25	3	NoT	524688	218782	22.8	23.4	10.2	7.4		2.63158	279.276
NSG79	15	4	C	2022-03-26	10.5714	25	3		524691	218782	23.5
NSG80	16	0	D	2022-03-26	10.5714	25	3	Act1%	524692	218783	16.6	19.6	11.5	9.6		18.0723	529.92
NSG82	18	2	D	2022-03-26	10.5714	25	3	NoT	524694	218783	18.7	20.5	9.6	8.8		9.62567	371.712
NSG83	19	3	D	2022-03-26	10.5714	25	3	CT	524695	218783	18.7	20	12.7	9.6		6.95187	585.216
NSG84	20	4	D	2022-03-26	10.5714	25	3	CT	524696	218783	18.9	21.1	11.3	10.1		11.6402	576.356
NSG86	22	1	E	2022-03-26	10.5714	25	3	CT	524698	218784	19.7	22.9	10.1	7.1		16.2437	254.57
NSG87	23	2	E	2022-03-26	10.5714	25	3	NoT	524699	218784	18.9	20.6	7.1	3.9		8.99471	53.9955
NSG88	24	3	E	2022-03-26	10.5714	25	3	Act1%	524700	218784	20.5	20.6	5.8	4.7		0.487805	64.061
NSG89	25	4	E	2022-03-26	10.5714	25	3	CT	524701	218784	21.7	23.5	3.8	3		8.29493	17.1
NSG90	26	0	F	2022-03-26	10.5714	25	3	CT	524702	218785	19.7	20.4	7.2	6		3.5533	129.6
NSG91	27	1	F	2022-03-26	10.5714	25	3	NoT	524703	218785	19.4	21.9	11.6	8		12.8866	371.2
NSG92	28	2	F	2022-03-26	10.5714	25	3	Act1%	524704	218785	22.9	23.3	4.2	3.2		1.74672	21.504
NSG93	29	3	F	2022-03-26	10.5714	25	3	CT	524705	218785	17.6	18.7	8.5	8.4		6.25	299.88
NSG94	30	4	F	2022-03-26	10.5714	25	3	Act1%	524706	218785	23.6	24.2	3.9	3.9		2.54237	29.6595
NSG65	1	0	A	2022-03-28	10.8571	27	5	Act1%	524677	218780	21.5	21.7	10.6	9.3		0.930233	458.397
NSG67	3	2	A	2022-03-28	10.8571	27	5	CT	524679	218780	22	23	9.5	7.4		4.54545	260.11
NSG68	4	3	A	2022-03-28	10.8571	27	5	NoT	524680	218780	19.9	22.3	5.6	4.6		12.0603	59.248
NSG69	5	4	A	2022-03-28	10.8571	27	5		524681	218780	22.6
NSG70	6	0	B	2022-03-28	10.8571	27	5		524682	218781	21.4
NSG71	7	1	B	2022-03-28	10.8571	27	5	NoT	524683	218781	20.9	23.5	10.3	7.5		12.4402	289.688
NSG72	8	2	B	2022-03-28	10.8571	27	5	CT	524684	218781	22.7	25.6	15.8	14.8		12.7753	1730.42
NSG73	9	3	B	2022-03-28	10.8571	27	5		524685	218781	21.3
NSG74	10	4	B	2022-03-28	10.8571	27	5		524686	218781	21.9
NSG76	12	1	C	2022-03-28	10.8571	27	5	NoT	524688	218782	22.8	24.1	10.8	7.6		5.70175	311.904
NSG79	15	4	C	2022-03-28	10.8571	27	5		524691	218782	23.5
NSG80	16	0	D	2022-03-28	10.8571	27	5	Act1%	524692	218783	16.6	20.3	12.8	10.2		22.2892	665.856
NSG82	18	2	D	2022-03-28	10.8571	27	5	NoT	524694	218783	18.7	20.6	11.6	10.3		10.1604	615.322
NSG83	19	3	D	2022-03-28	10.8571	27	5	CT	524695	218783	18.7	20.3	14.2	9		8.55615	575.1
NSG84	20	4	D	2022-03-28	10.8571	27	5	CT	524696	218783	18.9	21.5	15	11.9		13.7566	1062.08
NSG86	22	1	E	2022-03-28	10.8571	27	5	CT	524698	218784	19.7	22.1	11.7	7.4		12.1827	320.346
NSG87	23	2	E	2022-03-28	10.8571	27	5	NoT	524699	218784	18.9	20.7	7.8	4.9		9.52381	93.639
NSG88	24	3	E	2022-03-28	10.8571	27	5	Act1%	524700	218784	20.5	21.3	6.1	5		3.90244	76.25
NSG89	25	4	E	2022-03-28	10.8571	27	5	CT	524701	218784	21.7	23.5	3.9	3.5		8.29493	23.8875
NSG90	26	0	F	2022-03-28	10.8571	27	5	CT	524702	218785	19.7	21.7	8	6.9		10.1523	190.44
NSG91	27	1	F	2022-03-28	10.8571	27	5	NoT	524703	218785	19.4	22.5	12.5	8.2		15.9794	420.25
NSG92	28	2	F	2022-03-28	10.8571	27	5	Act1%	524704	218785	22.9	24	5.2	4.2		4.80349	45.864
NSG93	29	3	F	2022-03-28	10.8571	27	5	CT	524705	218785	17.6	18.9	8.8	8		7.38636	281.6
NSG94	30	4	F	2022-03-28	10.8571	27	5	Act1%	524706	218785	23.6	25.1	4.2	3.7		6.35593	28.749
NSG65	1	0	A	2022-03-30	11.1429	29	7	Act1%	524677	218780	21.5	22.4	11.1	9.7		4.18605	522.199
NSG67	3	2	A	2022-03-30	11.1429	29	7	CT	524679	218780	22	23.4	10.1	8.4		6.36364	356.328
NSG68	4	3	A	2022-03-30	11.1429	29	7	NoT	524680	218780	19.9	22.5	6.3	5.9		13.0653	109.652
NSG69	5	4	A	2022-03-30	11.1429	29	7		524681	218780	22.6
NSG70	6	0	B	2022-03-30	11.1429	29	7		524682	218781	21.4
NSG71	7	1	B	2022-03-30	11.1429	29	7	CT	524683	218781	20.9	23.9	10.9	8.7		14.3541	412.51
NSG72	8	2	B	2022-03-30	11.1429	29	7	CT	524684	218781	22.7	26.4	18.1	15.9		16.2996	2287.93
NSG73	9	3	B	2022-03-30	11.1429	29	7		524685	218781	21.3
NSG74	10	4	B	2022-03-30	11.1429	29	7		524686	218781	21.9
NSG76	12	1	C	2022-03-30	11.1429	29	7	NoT	524688	218782	22.8	23.7	10.6	8.8		3.94737	410.432
NSG79	15	4	C	2022-03-30	11.1429	29	7		524691	218782	23.5
NSG80	16	0	D	2022-03-30	11.1429	29	7	Act1%	524692	218783	16.6	21	14.2	11.6		26.506	955.376
NSG82	18	2	D	2022-03-30	11.1429	29	7	NoT	524694	218783	18.7	22	12.7	11.2		17.6471	796.544
NSG83	19	3	D	2022-03-30	11.1429	29	7	CT	524695	218783	18.7	20.5	15.3	11.9		9.62567	1083.32
NSG84	20	4	D	2022-03-30	11.1429	29	7	CT	524696	218783	18.9	22.5	15.1	12.9		19.0476	1256.4
NSG86	22	1	E	2022-03-30	11.1429	29	7	CT	524698	218784	19.7	23	12.5	8.4		16.7513	441
NSG87	23	2	E	2022-03-30	11.1429	29	7	NoT	524699	218784	18.9	20.7	8.8	6.5		9.52381	185.9
NSG88	24	3	E	2022-03-30	11.1429	29	7	Act1%	524700	218784	20.5	21.9	10.4	6.5		6.82927	219.7
NSG89	25	4	E	2022-03-30	11.1429	29	7	CT	524701	218784	21.7	24.2	4.1	4.1		11.5207	34.4605
NSG90	26	0	F	2022-03-30	11.1429	29	7	CT	524702	218785	19.7	21.9	9	7.3		11.1675	239.805
NSG91	27	1	F	2022-03-30	11.1429	29	7	NoT	524703	218785	19.4	22.3	14.1	8.9		14.9485	558.431
NSG92	28	2	F	2022-03-30	11.1429	29	7	Act1%	524704	218785	22.9	25.4	4.6	4.6		10.917	48.668
NSG93	29	3	F	2022-03-30	11.1429	29	7	CT	524705	218785	17.6	19.6	11	9.8		11.3636	528.22
NSG94	30	4	F	2022-03-30	11.1429	29	7	Act1%	524706	218785	23.6	24.5	4.4	3.9		3.81356	33.462
NSG65	1	0	A	2022-04-01	11.4286	31	9	Act1%	524677	218780	21.5	22	11.2	10.6		2.32558	629.216
NSG67	3	2	A	2022-04-01	11.4286	31	9	CT	524679	218780	22	23	11.4	8.1		4.54545	373.977
NSG68	4	3	A	2022-04-01	11.4286	31	9	NoT	524680	218780	19.9	22.4	7.3	5.7		12.5628	118.588
NSG69	5	4	A	2022-04-01	11.4286	31	9		524681	218780	22.6
NSG70	6	0	B	2022-04-01	11.4286	31	9		524682	218781	21.4
NSG71	7	1	B	2022-04-01	11.4286	31	9	CT	524683	218781	20.9	22.4	12.6	9.5		7.17703	568.575
NSG72	8	2	B	2022-04-01	11.4286	31	9	CT	524684	218781	22.7
NSG73	9	3	B	2022-04-01	11.4286	31	9		524685	218781	21.3
NSG74	10	4	B	2022-04-01	11.4286	31	9		524686	218781	21.9
NSG76	12	1	C	2022-04-01	11.4286	31	9	NoT	524688	218782	22.8	23	11	7.6		0.877193	317.68
NSG79	15	4	C	2022-04-01	11.4286	31	9		524691	218782	23.5
NSG80	16	0	D	2022-04-01	11.4286	31	9	Act1%	524692	218783	16.6	21	16	12.1		26.506	1171.28
NSG82	18	2	D	2022-04-01	11.4286	31	9	NoT	524694	218783	18.7	21.8	14.7	13.1		16.5775	1261.33
NSG83	19	3	D	2022-04-01	11.4286	31	9	CT	524695	218783	18.7	19.4	16.1	12		3.74332	1159.2
NSG84	20	4	D	2022-04-01	11.4286	31	9	CT	524696	218783	18.9
NSG86	22	1	E	2022-04-01	11.4286	31	9	CT	524698	218784	19.7	22	13.3	8.6		11.6751	491.834
NSG87	23	2	E	2022-04-01	11.4286	31	9	NoT	524699	218784	18.9	20.1	9.4	6.1		6.34921	174.887
NSG88	24	3	E	2022-04-01	11.4286	31	9	Act1%	524700	218784	20.5	21.8	11.6	7.1		6.34146	292.378
NSG89	25	4	E	2022-04-01	11.4286	31	9	CT	524701	218784	21.7	22.9	4.3	3.9		5.52995	32.7015
NSG90	26	0	F	2022-04-01	11.4286	31	9	CT	524702	218785	19.7	22	9.1	8.7		11.6751	344.389
NSG91	27	1	F	2022-04-01	11.4286	31	9	NoT	524703	218785	19.4	21.7	15.1	9.5		11.8557	681.387
NSG92	28	2	F	2022-04-01	11.4286	31	9	Act1%	524704	218785	22.9	23.9	4.1	4.1		4.36681	34.4605
NSG93	29	3	F	2022-04-01	11.4286	31	9	CT	524705	218785	17.6	19.7	11.1	9.7		11.9318	522.199
NSG94	30	4	F	2022-04-01	11.4286	31	9	Act1%	524706	218785	23.6	24.6	5.2	4.7		4.23729	57.434
NSG65	1	0	A	2022-04-03	11.7143	33	11	Act1%	524677	218780	21.5	23	11.8	9.7		6.97674	555.131
NSG67	3	2	A	2022-04-03	11.7143	33	11	CT	524679	218780	22	22.9	11.2	8.1		4.09091	367.416
NSG68	4	3	A	2022-04-03	11.7143	33	11	NoT	524680	218780	19.9	22.3	8	6.5		12.0603	169
NSG69	5	4	A	2022-04-03	11.7143	33	11		524681	218780	22.6
NSG70	6	0	B	2022-04-03	11.7143	33	11		524682	218781	21.4
NSG71	7	1	B	2022-04-03	11.7143	33	11	CT	524683	218781	20.9	24.5	13.5	10		17.2249	675
NSG72	8	2	B	2022-04-03	11.7143	33	11	CT	524684	218781	22.7
NSG73	9	3	B	2022-04-03	11.7143	33	11		524685	218781	21.3
NSG74	10	4	B	2022-04-03	11.7143	33	11		524686	218781	21.9
NSG76	12	1	C	2022-04-03	11.7143	33	11	NoT	524688	218782	22.8	23.2	11.7	7.5		1.75439	329.062
NSG79	15	4	C	2022-04-03	11.7143	33	11		524691	218782	23.5
NSG80	16	0	D	2022-04-03	11.7143	33	11	Act1%	524692	218783	16.6
NSG82	18	2	D	2022-04-03	11.7143	33	11	NoT	524694	218783	18.7
NSG83	19	3	D	2022-04-03	11.7143	33	11	CT	524695	218783	18.7
NSG84	20	4	D	2022-04-03	11.7143	33	11	CT	524696	218783	18.9
NSG86	22	1	E	2022-04-03	11.7143	33	11	CT	524698	218784	19.7	22.5	15.7	10		14.2132	785
NSG87	23	2	E	2022-04-03	11.7143	33	11	NoT	524699	218784	18.9	20.9	11.6	7.1		10.582	292.378
NSG88	24	3	E	2022-04-03	11.7143	33	11	Act1%	524700	218784	20.5	21.4	10.9	6.7		4.39024	244.651
NSG89	25	4	E	2022-04-03	11.7143	33	11	CT	524701	218784	21.7	22.8	4.8	4.8		5.06912	55.296
NSG90	26	0	F	2022-04-03	11.7143	33	11	CT	524702	218785	19.7	21.6	9	8		9.64467	288
NSG91	27	1	F	2022-04-03	11.7143	33	11	NoT	524703	218785	19.4	21.8	16.2	9.8		12.3711	777.924
NSG92	28	2	F	2022-04-03	11.7143	33	11	Act1%	524704	218785	22.9	24.2	4.7	4.2		5.67686	41.454
NSG93	29	3	F	2022-04-03	11.7143	33	11	CT	524705	218785	17.6	19.6	11.8	10		11.3636	590
NSG94	30	4	F	2022-04-03	11.7143	33	11	Act1%	524706	218785	23.6	23.8	4	3.9		0.847458	30.42
NSG65	1	0	A	2022-04-05	12	35	13	Act1%	524677	218780	21.5	23.1	11.4	9.5		7.44186	514.425
NSG67	3	2	A	2022-04-05	12	35	13	CT	524679	218780	22	23.1	12.2	8.9		5	483.181
NSG68	4	3	A	2022-04-05	12	35	13	NoT	524680	218780	19.9	23.3	9.3	6.9		17.0854	221.387
NSG69	5	4	A	2022-04-05	12	35	13		524681	218780	22.6
NSG70	6	0	B	2022-04-05	12	35	13		524682	218781	21.4
NSG71	7	1	B	2022-04-05	12	35	13	CT	524683	218781	20.9	24.9	15.3	11.5		19.1388	1011.71
NSG72	8	2	B	2022-04-05	12	35	13	CT	524684	218781	22.7
NSG73	9	3	B	2022-04-05	12	35	13		524685	218781	21.3
NSG74	10	4	B	2022-04-05	12	35	13		524686	218781	21.9
NSG76	12	1	C	2022-04-05	12	35	13	NoT	524688	218782	22.8	24	13.6	7.8		5.26316	413.712
NSG79	15	4	C	2022-04-05	12	35	13		524691	218782	23.5
NSG80	16	0	D	2022-04-05	12	35	13	Act1%	524692	218783	16.6
NSG82	18	2	D	2022-04-05	12	35	13	NoT	524694	218783	18.7
NSG83	19	3	D	2022-04-05	12	35	13	CT	524695	218783	18.7
NSG84	20	4	D	2022-04-05	12	35	13	CT	524696	218783	18.9
NSG86	22	1	E	2022-04-05	12	35	13	CT	524698	218784	19.7	23	17.5	11.9		16.7513	1239.09
NSG87	23	2	E	2022-04-05	12	35	13	NoT	524699	218784	18.9	20.9	13.5	7.5		10.582	379.688
NSG88	24	3	E	2022-04-05	12	35	13	Act1%	524700	218784	20.5	22.6	10.2	6.3		10.2439	202.419
NSG89	25	4	E	2022-04-05	12	35	13	CT	524701	218784	21.7	23.6	5.2	4.1		8.75576	43.706
NSG90	26	0	F	2022-04-05	12	35	13	CT	524702	218785	19.7	22.5	11.5	11.2		14.2132	721.28
NSG91	27	1	F	2022-04-05	12	35	13	NoT	524703	218785	19.4	21.8	16.6	11.5		12.3711	1097.67
NSG92	28	2	F	2022-04-05	12	35	13	Act1%	524704	218785	22.9	25	4.6	4.6		9.17031	48.668
NSG93	29	3	F	2022-04-05	12	35	13	CT	524705	218785	17.6	20.8	14.4	12.1		18.1818	1054.15
NSG94	30	4	F	2022-04-05	12	35	13	Act1%	524706	218785	23.6	25.1	5.7	3.8		6.35593	41.154
NSG65	1	0	A	2022-04-08	12.4286	38	16	Act1%	524677	218780	21.5	23	11.8	10.9		6.97674	700.979
NSG67	3	2	A	2022-04-08	12.4286	38	16	CT	524679	218780	22	23.2	13.6	10.7		5.45455	778.532
NSG68	4	3	A	2022-04-08	12.4286	38	16	NoT	524680	218780	19.9	22.3	10.6	9.1		12.0603	438.893
NSG69	5	4	A	2022-04-08	12.4286	38	16		524681	218780	22.6
NSG70	6	0	B	2022-04-08	12.4286	38	16		524682	218781	21.4
NSG71	7	1	B	2022-04-08	12.4286	38	16	CT	524683	218781	20.9
NSG72	8	2	B	2022-04-08	12.4286	38	16	CT	524684	218781	22.7
NSG73	9	3	B	2022-04-08	12.4286	38	16		524685	218781	21.3
NSG74	10	4	B	2022-04-08	12.4286	38	16		524686	218781	21.9
NSG76	12	1	C	2022-04-08	12.4286	38	16	NoT	524688	218782	22.8	24.5	15.2	11.5		7.45614	1005.1
NSG79	15	4	C	2022-04-08	12.4286	38	16		524691	218782	23.5
NSG80	16	0	D	2022-04-08	12.4286	38	16	Act1%	524692	218783	16.6
NSG82	18	2	D	2022-04-08	12.4286	38	16	NoT	524694	218783	18.7
NSG83	19	3	D	2022-04-08	12.4286	38	16	CT	524695	218783	18.7
NSG84	20	4	D	2022-04-08	12.4286	38	16	CT	524696	218783	18.9
NSG86	22	1	E	2022-04-08	12.4286	38	16	CT	524698	218784	19.7
NSG87	23	2	E	2022-04-08	12.4286	38	16	NoT	524699	218784	18.9	21.9	16.3	11.9		15.873	1154.12
NSG88	24	3	E	2022-04-08	12.4286	38	16	Act1%	524700	218784	20.5	22.2	11.4	8.6		8.29268	421.572
NSG89	25	4	E	2022-04-08	12.4286	38	16	CT	524701	218784	21.7	24.1	3.9	3.8		11.0599	28.158
NSG90	26	0	F	2022-04-08	12.4286	38	16	CT	524702	218785	19.7	22.4	18.4	15.1		13.7056	2097.69
NSG91	27	1	F	2022-04-08	12.4286	38	16	NoT	524703	218785	19.4
NSG92	28	2	F	2022-04-08	12.4286	38	16	Act1%	524704	218785	22.9	25	4.5	3.8		9.17031	32.49
NSG93	29	3	F	2022-04-08	12.4286	38	16	CT	524705	218785	17.6
NSG94	30	4	F	2022-04-08	12.4286	38	16	Act1%	524706	218785	23.6	25.3	5.7	5.4		7.20339	83.106
NSG65	1	0	A	2022-04-11	12.8571	41	19	Act1%	524677	218780	21.5
NSG67	3	2	A	2022-04-11	12.8571	41	19	CT	524679	218780	22
NSG68	4	3	A	2022-04-11	12.8571	41	19	NoT	524680	218780	19.9	20.6	11.5	7.9		3.51759	358.858
NSG69	5	4	A	2022-04-11	12.8571	41	19		524681	218780	22.6
NSG70	6	0	B	2022-04-11	12.8571	41	19		524682	218781	21.4
NSG71	7	1	B	2022-04-11	12.8571	41	19	CT	524683	218781	20.9
NSG72	8	2	B	2022-04-11	12.8571	41	19	CT	524684	218781	22.7
NSG73	9	3	B	2022-04-11	12.8571	41	19		524685	218781	21.3
NSG74	10	4	B	2022-04-11	12.8571	41	19		524686	218781	21.9
NSG76	12	1	C	2022-04-11	12.8571	41	19	NoT	524688	218782	22.8
NSG79	15	4	C	2022-04-11	12.8571	41	19		524691	218782	23.5
NSG80	16	0	D	2022-04-11	12.8571	41	19	Act1%	524692	218783	16.6
NSG82	18	2	D	2022-04-11	12.8571	41	19	NoT	524694	218783	18.7
NSG83	19	3	D	2022-04-11	12.8571	41	19	CT	524695	218783	18.7
NSG84	20	4	D	2022-04-11	12.8571	41	19	CT	524696	218783	18.9
NSG86	22	1	E	2022-04-11	12.8571	41	19	CT	524698	218784	19.7
NSG87	23	2	E	2022-04-11	12.8571	41	19	NoT	524699	218784	18.9
NSG88	24	3	E	2022-04-11	12.8571	41	19	Act1%	524700	218784	20.5	23.2	13.3	10.3		13.1707	705.499
NSG89	25	4	E	2022-04-11	12.8571	41	19	CT	524701	218784	21.7	23.1	5.7	4.8		6.45161	65.664
NSG90	26	0	F	2022-04-11	12.8571	41	19	CT	524702	218785	19.7
NSG91	27	1	F	2022-04-11	12.8571	41	19	NoT	524703	218785	19.4
NSG92	28	2	F	2022-04-11	12.8571	41	19	Act1%	524704	218785	22.9	24.7	4	3.6		7.86026	25.92
NSG93	29	3	F	2022-04-11	12.8571	41	19	CT	524705	218785	17.6
NSG94	30	4	F	2022-04-11	12.8571	41	19	Act1%	524706	218785	23.6	26	3.9	3.7		10.1695	26.6955
NSG65	1	0	A	2022-04-13	13.1429	43	21	Act1%	524677	218780	21.5
NSG67	3	2	A	2022-04-13	13.1429	43	21	CT	524679	218780	22
NSG68	4	3	A	2022-04-13	13.1429	43	21	NoT	524680	218780	19.9	22.6	11.9	9.1		13.5678	492.719
NSG69	5	4	A	2022-04-13	13.1429	43	21		524681	218780	22.6
NSG70	6	0	B	2022-04-13	13.1429	43	21		524682	218781	21.4
NSG71	7	1	B	2022-04-13	13.1429	43	21	CT	524683	218781	20.9
NSG72	8	2	B	2022-04-13	13.1429	43	21	CT	524684	218781	22.7
NSG73	9	3	B	2022-04-13	13.1429	43	21		524685	218781	21.3
NSG74	10	4	B	2022-04-13	13.1429	43	21		524686	218781	21.9
NSG76	12	1	C	2022-04-13	13.1429	43	21	NoT	524688	218782	22.8
NSG79	15	4	C	2022-04-13	13.1429	43	21		524691	218782	23.5
NSG80	16	0	D	2022-04-13	13.1429	43	21	Act1%	524692	218783	16.6
NSG82	18	2	D	2022-04-13	13.1429	43	21	NoT	524694	218783	18.7
NSG83	19	3	D	2022-04-13	13.1429	43	21	CT	524695	218783	18.7
NSG84	20	4	D	2022-04-13	13.1429	43	21	CT	524696	218783	18.9
NSG86	22	1	E	2022-04-13	13.1429	43	21	CT	524698	218784	19.7
NSG87	23	2	E	2022-04-13	13.1429	43	21	NoT	524699	218784	18.9
NSG88	24	3	E	2022-04-13	13.1429	43	21	Act1%	524700	218784	20.5	24	13.4	10.7		17.0732	767.083
NSG89	25	4	E	2022-04-13	13.1429	43	21	CT	524701	218784	21.7	23.8	6.1	5.6		9.67742	95.648
NSG90	26	0	F	2022-04-13	13.1429	43	21	CT	524702	218785	19.7
NSG91	27	1	F	2022-04-13	13.1429	43	21	NoT	524703	218785	19.4
NSG92	28	2	F	2022-04-13	13.1429	43	21	Act1%	524704	218785	22.9	25	5.2	4.6		9.17031	55.016
NSG93	29	3	F	2022-04-13	13.1429	43	21	CT	524705	218785	17.6
NSG94	30	4	F	2022-04-13	13.1429	43	21	Act1%	524706	218785	23.6	25.8	7	5.6		9.32203	109.76
NSG65	1	0	A	2022-04-15	13.4286	45	23	Act1%	524677	218780	21.5
NSG67	3	2	A	2022-04-15	13.4286	45	23	CT	524679	218780	22
NSG68	4	3	A	2022-04-15	13.4286	45	23	NoT	524680	218780	19.9
NSG69	5	4	A	2022-04-15	13.4286	45	23		524681	218780	22.6
NSG70	6	0	B	2022-04-15	13.4286	45	23		524682	218781	21.4
NSG71	7	1	B	2022-04-15	13.4286	45	23	CT	524683	218781	20.9
NSG72	8	2	B	2022-04-15	13.4286	45	23	CT	524684	218781	22.7
NSG73	9	3	B	2022-04-15	13.4286	45	23		524685	218781	21.3
NSG74	10	4	B	2022-04-15	13.4286	45	23		524686	218781	21.9
NSG76	12	1	C	2022-04-15	13.4286	45	23	NoT	524688	218782	22.8
NSG79	15	4	C	2022-04-15	13.4286	45	23		524691	218782	23.5
NSG80	16	0	D	2022-04-15	13.4286	45	23	Act1%	524692	218783	16.6
NSG82	18	2	D	2022-04-15	13.4286	45	23	NoT	524694	218783	18.7
NSG83	19	3	D	2022-04-15	13.4286	45	23	CT	524695	218783	18.7
NSG84	20	4	D	2022-04-15	13.4286	45	23	CT	524696	218783	18.9
NSG86	22	1	E	2022-04-15	13.4286	45	23	CT	524698	218784	19.7
NSG87	23	2	E	2022-04-15	13.4286	45	23	NoT	524699	218784	18.9
NSG88	24	3	E	2022-04-15	13.4286	45	23	Act1%	524700	218784	20.5	25	14.8	12.4		21.9512	1137.82
NSG89	25	4	E	2022-04-15	13.4286	45	23	CT	524701	218784	21.7	23.1	8.8	7.5		6.45161	247.5
NSG90	26	0	F	2022-04-15	13.4286	45	23	CT	524702	218785	19.7
NSG91	27	1	F	2022-04-15	13.4286	45	23	NoT	524703	218785	19.4
NSG92	28	2	F	2022-04-15	13.4286	45	23	Act1%	524704	218785	22.9	25.2	4.8	4.7		10.0437	53.016
NSG93	29	3	F	2022-04-15	13.4286	45	23	CT	524705	218785	17.6
NSG94	30	4	F	2022-04-15	13.4286	45	23	Act1%	524706	218785	23.6	24.7	5.6	5.4		4.66102	81.648
NSG65	1	0	A	2022-04-18	13.8571	48	26	Act1%	524677	218780	21.5
NSG67	3	2	A	2022-04-18	13.8571	48	26	CT	524679	218780	22
NSG68	4	3	A	2022-04-18	13.8571	48	26	NoT	524680	218780	19.9
NSG69	5	4	A	2022-04-18	13.8571	48	26		524681	218780	22.6
NSG70	6	0	B	2022-04-18	13.8571	48	26		524682	218781	21.4
NSG71	7	1	B	2022-04-18	13.8571	48	26	CT	524683	218781	20.9
NSG72	8	2	B	2022-04-18	13.8571	48	26	CT	524684	218781	22.7
NSG73	9	3	B	2022-04-18	13.8571	48	26		524685	218781	21.3
NSG74	10	4	B	2022-04-18	13.8571	48	26		524686	218781	21.9
NSG76	12	1	C	2022-04-18	13.8571	48	26	NoT	524688	218782	22.8
NSG79	15	4	C	2022-04-18	13.8571	48	26		524691	218782	23.5
NSG80	16	0	D	2022-04-18	13.8571	48	26	Act1%	524692	218783	16.6
NSG82	18	2	D	2022-04-18	13.8571	48	26	NoT	524694	218783	18.7
NSG83	19	3	D	2022-04-18	13.8571	48	26	CT	524695	218783	18.7
NSG84	20	4	D	2022-04-18	13.8571	48	26	CT	524696	218783	18.9
NSG86	22	1	E	2022-04-18	13.8571	48	26	CT	524698	218784	19.7
NSG87	23	2	E	2022-04-18	13.8571	48	26	NoT	524699	218784	18.9
NSG88	24	3	E	2022-04-18	13.8571	48	26	Act1%	524700	218784	20.5
NSG89	25	4	E	2022-04-18	13.8571	48	26	CT	524701	218784	21.7	23.7	8	7.6		9.21659	231.04
NSG90	26	0	F	2022-04-18	13.8571	48	26	CT	524702	218785	19.7
NSG91	27	1	F	2022-04-18	13.8571	48	26	NoT	524703	218785	19.4
NSG92	28	2	F	2022-04-18	13.8571	48	26	Act1%	524704	218785	22.9	25.9	3.6	3.5		13.1004	22.05
NSG93	29	3	F	2022-04-18	13.8571	48	26	CT	524705	218785	17.6
NSG94	30	4	F	2022-04-18	13.8571	48	26	Act1%	524706	218785	23.6	24.9	5.9	4.9		5.50847	70.8295
NSG65	1	0	A	2022-04-20	14.1429	50	28	Act1%	524677	218780	21.5
NSG67	3	2	A	2022-04-20	14.1429	50	28	CT	524679	218780	22
NSG68	4	3	A	2022-04-20	14.1429	50	28	NoT	524680	218780	19.9
NSG69	5	4	A	2022-04-20	14.1429	50	28		524681	218780	22.6
NSG70	6	0	B	2022-04-20	14.1429	50	28		524682	218781	21.4
NSG71	7	1	B	2022-04-20	14.1429	50	28	CT	524683	218781	20.9
NSG72	8	2	B	2022-04-20	14.1429	50	28	CT	524684	218781	22.7
NSG73	9	3	B	2022-04-20	14.1429	50	28		524685	218781	21.3
NSG74	10	4	B	2022-04-20	14.1429	50	28		524686	218781	21.9
NSG76	12	1	C	2022-04-20	14.1429	50	28	NoT	524688	218782	22.8
NSG79	15	4	C	2022-04-20	14.1429	50	28		524691	218782	23.5
NSG80	16	0	D	2022-04-20	14.1429	50	28	Act1%	524692	218783	16.6
NSG82	18	2	D	2022-04-20	14.1429	50	28	NoT	524694	218783	18.7
NSG83	19	3	D	2022-04-20	14.1429	50	28	CT	524695	218783	18.7
NSG84	20	4	D	2022-04-20	14.1429	50	28	CT	524696	218783	18.9
NSG86	22	1	E	2022-04-20	14.1429	50	28	CT	524698	218784	19.7
NSG87	23	2	E	2022-04-20	14.1429	50	28	NoT	524699	218784	18.9
NSG88	24	3	E	2022-04-20	14.1429	50	28	Act1%	524700	218784	20.5
NSG89	25	4	E	2022-04-20	14.1429	50	28	CT	524701	218784	21.7	23.5	10.2	7.1		8.29493	257.091
NSG90	26	0	F	2022-04-20	14.1429	50	28	CT	524702	218785	19.7
NSG91	27	1	F	2022-04-20	14.1429	50	28	NoT	524703	218785	19.4
NSG92	28	2	F	2022-04-20	14.1429	50	28	Act1%	524704	218785	22.9	25.5	5.5	4.8		11.3537	63.36
NSG93	29	3	F	2022-04-20	14.1429	50	28	CT	524705	218785	17.6
NSG94	30	4	F	2022-04-20	14.1429	50	28	Act1%	524706	218785	23.6	25.3	5.3	5.2		7.20339	71.656
NSG65	1	0	A	2022-04-22	14.4286	52	30	Act1%	524677	218780	21.5
NSG67	3	2	A	2022-04-22	14.4286	52	30	CT	524679	218780	22
NSG68	4	3	A	2022-04-22	14.4286	52	30	NoT	524680	218780	19.9
NSG69	5	4	A	2022-04-22	14.4286	52	30		524681	218780	22.6
NSG70	6	0	B	2022-04-22	14.4286	52	30		524682	218781	21.4
NSG71	7	1	B	2022-04-22	14.4286	52	30	CT	524683	218781	20.9
NSG72	8	2	B	2022-04-22	14.4286	52	30	CT	524684	218781	22.7
NSG73	9	3	B	2022-04-22	14.4286	52	30		524685	218781	21.3
NSG74	10	4	B	2022-04-22	14.4286	52	30		524686	218781	21.9
NSG76	12	1	C	2022-04-22	14.4286	52	30	NoT	524688	218782	22.8
NSG79	15	4	C	2022-04-22	14.4286	52	30		524691	218782	23.5
NSG80	16	0	D	2022-04-22	14.4286	52	30	Act1%	524692	218783	16.6
NSG82	18	2	D	2022-04-22	14.4286	52	30	NoT	524694	218783	18.7
NSG83	19	3	D	2022-04-22	14.4286	52	30	CT	524695	218783	18.7
NSG84	20	4	D	2022-04-22	14.4286	52	30	CT	524696	218783	18.9
NSG86	22	1	E	2022-04-22	14.4286	52	30	CT	524698	218784	19.7
NSG87	23	2	E	2022-04-22	14.4286	52	30	NoT	524699	218784	18.9
NSG88	24	3	E	2022-04-22	14.4286	52	30	Act1%	524700	218784	20.5
NSG89	25	4	E	2022-04-22	14.4286	52	30	CT	524701	218784	21.7	23.7	10.1	9.2		9.21659	427.432
NSG90	26	0	F	2022-04-22	14.4286	52	30	CT	524702	218785	19.7
NSG91	27	1	F	2022-04-22	14.4286	52	30	NoT	524703	218785	19.4
NSG92	28	2	F	2022-04-22	14.4286	52	30	Act1%	524704	218785	22.9	25.6	5.8	4.5		11.7904	58.725
NSG93	29	3	F	2022-04-22	14.4286	52	30	CT	524705	218785	17.6
NSG94	30	4	F	2022-04-22	14.4286	52	30	Act1%	524706	218785	23.6	25.4	4.9	4.7		7.62712	54.1205
NSG65	1	0	A	2022-04-25	14.8571	55	33	Act1%	524677	218780	21.5
NSG67	3	2	A	2022-04-25	14.8571	55	33	CT	524679	218780	22
NSG68	4	3	A	2022-04-25	14.8571	55	33	NoT	524680	218780	19.9
NSG69	5	4	A	2022-04-25	14.8571	55	33		524681	218780	22.6
NSG70	6	0	B	2022-04-25	14.8571	55	33		524682	218781	21.4
NSG71	7	1	B	2022-04-25	14.8571	55	33	CT	524683	218781	20.9
NSG72	8	2	B	2022-04-25	14.8571	55	33	CT	524684	218781	22.7
NSG73	9	3	B	2022-04-25	14.8571	55	33		524685	218781	21.3
NSG74	10	4	B	2022-04-25	14.8571	55	33		524686	218781	21.9
NSG76	12	1	C	2022-04-25	14.8571	55	33	NoT	524688	218782	22.8
NSG79	15	4	C	2022-04-25	14.8571	55	33		524691	218782	23.5
NSG80	16	0	D	2022-04-25	14.8571	55	33	Act1%	524692	218783	16.6
NSG82	18	2	D	2022-04-25	14.8571	55	33	NoT	524694	218783	18.7
NSG83	19	3	D	2022-04-25	14.8571	55	33	CT	524695	218783	18.7
NSG84	20	4	D	2022-04-25	14.8571	55	33	CT	524696	218783	18.9
NSG86	22	1	E	2022-04-25	14.8571	55	33	CT	524698	218784	19.7
NSG87	23	2	E	2022-04-25	14.8571	55	33	NoT	524699	218784	18.9
NSG88	24	3	E	2022-04-25	14.8571	55	33	Act1%	524700	218784	20.5
NSG89	25	4	E	2022-04-25	14.8571	55	33	CT	524701	218784	21.7	23.9	9.4	9		10.1382	380.7
NSG90	26	0	F	2022-04-25	14.8571	55	33	CT	524702	218785	19.7
NSG91	27	1	F	2022-04-25	14.8571	55	33	NoT	524703	218785	19.4
NSG92	28	2	F	2022-04-25	14.8571	55	33	Act1%	524704	218785	22.9	24.8	5.3	4.6		8.29694	56.074
NSG93	29	3	F	2022-04-25	14.8571	55	33	CT	524705	218785	17.6
NSG94	30	4	F	2022-04-25	14.8571	55	33	Act1%	524706	218785	23.6	25.3	4.6	3.8		7.20339	33.212
NSG65	1	0	A	2022-04-27	15.1429	57	35	Act1%	524677	218780	21.5
NSG67	3	2	A	2022-04-27	15.1429	57	35	CT	524679	218780	22
NSG68	4	3	A	2022-04-27	15.1429	57	35	NoT	524680	218780	19.9
NSG69	5	4	A	2022-04-27	15.1429	57	35		524681	218780	22.6
NSG70	6	0	B	2022-04-27	15.1429	57	35		524682	218781	21.4
NSG71	7	1	B	2022-04-27	15.1429	57	35	CT	524683	218781	20.9
NSG72	8	2	B	2022-04-27	15.1429	57	35	CT	524684	218781	22.7
NSG73	9	3	B	2022-04-27	15.1429	57	35		524685	218781	21.3
NSG74	10	4	B	2022-04-27	15.1429	57	35		524686	218781	21.9
NSG76	12	1	C	2022-04-27	15.1429	57	35	NoT	524688	218782	22.8
NSG79	15	4	C	2022-04-27	15.1429	57	35		524691	218782	23.5
NSG80	16	0	D	2022-04-27	15.1429	57	35	Act1%	524692	218783	16.6
NSG82	18	2	D	2022-04-27	15.1429	57	35	NoT	524694	218783	18.7
NSG83	19	3	D	2022-04-27	15.1429	57	35	CT	524695	218783	18.7
NSG84	20	4	D	2022-04-27	15.1429	57	35	CT	524696	218783	18.9
NSG86	22	1	E	2022-04-27	15.1429	57	35	CT	524698	218784	19.7
NSG87	23	2	E	2022-04-27	15.1429	57	35	NoT	524699	218784	18.9
NSG88	24	3	E	2022-04-27	15.1429	57	35	Act1%	524700	218784	20.5
NSG89	25	4	E	2022-04-27	15.1429	57	35	CT	524701	218784	21.7	24	11.8	9.3		10.5991	510.291
NSG90	26	0	F	2022-04-27	15.1429	57	35	CT	524702	218785	19.7
NSG91	27	1	F	2022-04-27	15.1429	57	35	NoT	524703	218785	19.4
NSG92	28	2	F	2022-04-27	15.1429	57	35	Act1%	524704	218785	22.9	24.5	5.6	4.8		6.9869	64.512
NSG93	29	3	F	2022-04-27	15.1429	57	35	CT	524705	218785	17.6
NSG94	30	4	F	2022-04-27	15.1429	57	35	Act1%	524706	218785	23.6	25.3	4.6	3.8		7.20339	33.212
NSG65	1	0	A	2022-04-29	15.4286	59	37	Act1%	524677	218780	21.5
NSG67	3	2	A	2022-04-29	15.4286	59	37	CT	524679	218780	22
NSG68	4	3	A	2022-04-29	15.4286	59	37	NoT	524680	218780	19.9
NSG69	5	4	A	2022-04-29	15.4286	59	37		524681	218780	22.6
NSG70	6	0	B	2022-04-29	15.4286	59	37		524682	218781	21.4
NSG71	7	1	B	2022-04-29	15.4286	59	37	CT	524683	218781	20.9
NSG72	8	2	B	2022-04-29	15.4286	59	37	CT	524684	218781	22.7
NSG73	9	3	B	2022-04-29	15.4286	59	37		524685	218781	21.3
NSG74	10	4	B	2022-04-29	15.4286	59	37		524686	218781	21.9
NSG76	12	1	C	2022-04-29	15.4286	59	37	NoT	524688	218782	22.8
NSG79	15	4	C	2022-04-29	15.4286	59	37		524691	218782	23.5
NSG80	16	0	D	2022-04-29	15.4286	59	37	Act1%	524692	218783	16.6
NSG82	18	2	D	2022-04-29	15.4286	59	37	NoT	524694	218783	18.7
NSG83	19	3	D	2022-04-29	15.4286	59	37	CT	524695	218783	18.7
NSG84	20	4	D	2022-04-29	15.4286	59	37	CT	524696	218783	18.9
NSG86	22	1	E	2022-04-29	15.4286	59	37	CT	524698	218784	19.7
NSG87	23	2	E	2022-04-29	15.4286	59	37	NoT	524699	218784	18.9
NSG88	24	3	E	2022-04-29	15.4286	59	37	Act1%	524700	218784	20.5
NSG89	25	4	E	2022-04-29	15.4286	59	37	CT	524701	218784	21.7	23.7	10.9	10.4		9.21659	589.472
NSG90	26	0	F	2022-04-29	15.4286	59	37	CT	524702	218785	19.7
NSG91	27	1	F	2022-04-29	15.4286	59	37	NoT	524703	218785	19.4
NSG92	28	2	F	2022-04-29	15.4286	59	37	Act1%	524704	218785	22.9	25.4	5.8	3.9		10.917	44.109
NSG93	29	3	F	2022-04-29	15.4286	59	37	CT	524705	218785	17.6
NSG94	30	4	F	2022-04-29	15.4286	59	37	Act1%	524706	218785	23.6	24.8	0	0		5.08475	0
NSG65	1	0	A	2022-05-02	15.8571	62	40	Act1%	524677	218780	21.5
NSG67	3	2	A	2022-05-02	15.8571	62	40	CT	524679	218780	22
NSG68	4	3	A	2022-05-02	15.8571	62	40	NoT	524680	218780	19.9
NSG69	5	4	A	2022-05-02	15.8571	62	40		524681	218780	22.6
NSG70	6	0	B	2022-05-02	15.8571	62	40		524682	218781	21.4
NSG71	7	1	B	2022-05-02	15.8571	62	40	CT	524683	218781	20.9
NSG72	8	2	B	2022-05-02	15.8571	62	40	CT	524684	218781	22.7
NSG73	9	3	B	2022-05-02	15.8571	62	40		524685	218781	21.3
NSG74	10	4	B	2022-05-02	15.8571	62	40		524686	218781	21.9
NSG76	12	1	C	2022-05-02	15.8571	62	40	NoT	524688	218782	22.8
NSG79	15	4	C	2022-05-02	15.8571	62	40		524691	218782	23.5
NSG80	16	0	D	2022-05-02	15.8571	62	40	Act1%	524692	218783	16.6
NSG82	18	2	D	2022-05-02	15.8571	62	40	NoT	524694	218783	18.7
NSG83	19	3	D	2022-05-02	15.8571	62	40	CT	524695	218783	18.7
NSG84	20	4	D	2022-05-02	15.8571	62	40	CT	524696	218783	18.9
NSG86	22	1	E	2022-05-02	15.8571	62	40	CT	524698	218784	19.7
NSG87	23	2	E	2022-05-02	15.8571	62	40	NoT	524699	218784	18.9
NSG88	24	3	E	2022-05-02	15.8571	62	40	Act1%	524700	218784	20.5
NSG89	25	4	E	2022-05-02	15.8571	62	40	CT	524701	218784	21.7	24.3	9.5	9		11.9816	384.75
NSG90	26	0	F	2022-05-02	15.8571	62	40	CT	524702	218785	19.7
NSG91	27	1	F	2022-05-02	15.8571	62	40	NoT	524703	218785	19.4
NSG92	28	2	F	2022-05-02	15.8571	62	40	Act1%	524704	218785	22.9	24.1	2.6	2.2		5.24017	6.292
NSG93	29	3	F	2022-05-02	15.8571	62	40	CT	524705	218785	17.6
NSG94	30	4	F	2022-05-02	15.8571	62	40	Act1%	524706	218785	23.6	25.3	0	0		7.20339	0

## Sheet: Fig 6J
						RAW counts		norm to beads		per g of tumour		per million CD45+			Fig 6J			Fig S6N			Fig S6O
C tube weight (g)	c tube + tumor	tumor	Condition	Sample:	#beads	CD45	OT-I	CD45	OT-I	CD45	OT-I	OT-I			per gram of tumour			Tumour weight (mg)			per million CD45+
15.667	16.017	350	CT	Tube_001.fcs	6315	36743	1	123349	3.35709	616747	16.7854	27.2161			21%	1d1%		21%	1d1%		21%	1d1%
15.718	16.066	348	Act1	Tube_002.fcs	5601	95828	503	362713	1903.87	1.81356e+06	9519.37	5248.99			17	9519		350	348		27	5249
15.665	15.792	127	CT	Tube_003.fcs	13507	8664	1	13598.6	1.56956	107076	12.3587	115.42			12	16051		127	426		115	7768
15.726	16.128	402	CT	Tube_004.fcs	10002	107294	226	227418	479.024	1.13709e+06	2395.12	2106.36			2395	63445		402	200		2106	18455
15.666	15.839	173	CT	Tube_005.fcs	9168	134953	1411	312064	3262.78	1.80384e+06	18860	10455.5			18860	133024		173	400		10455	23003
15.703	16.129	426	Act1	Tube_006.fcs	6201	120873	939	413241	3210.26	2.06621e+06	16051.3	7768.48			2002	85760		358	553		2089	18819
15.698	15.898	200	Act1	Tube_007.fcs	4638	150418	2776	687551	12688.9	3.43776e+06	63444.6	18455.2			1711	11153		311	44		1968	16594
15.679	16.079	400	Act1	Tube_008.fcs	5111	278828	6414	1.15656e+06	26604.7	5.78278e+06	133024	23003.4			4988	199108		318	73		1850	63367
15.726	16.084	358	CT	Tube_009.fcs	7782	70369	147	191702	400.463	958509	2002.31	2088.99			93955	25411		169	224		28391	7551
15.73	16.041	311	CT	Tube_010.fcs	8612	70634	139	173878	342.174	869392	1710.87	1967.89			2197	9623		86	151		2257	4428
15.719	16.272	553	Act1	Tube_011.fcs	6070	260963	4911	911436	17152.1	4.55718e+06	85760.5	18818.8			3851	0		378	379		3419	0
15.711	16.029	318	CT	Tube_012.fcs	7034	178876	331	539120	997.612	2.6956e+06	4988.06	1850.44			12200			124			5691
15.732	15.901	169	CT	Tube_013.fcs	7597	200415	5690	559273	15878.4	3.30931e+06	93954.9	28391.1			30333			491			18727
15.656	15.742	86	CT	Tube_014.fcs	10437	41205	93	83697	188.905	973221	2196.57	2257.01			4212			159			2906
15.655	15.699	44	Act1	Tube_016.fcs	13565	18922	314	29572.2	490.734	672095	11153	16594.4		Shapiro-Wilk test	21%	1d1%		21%	1d1%		21%	1d1%
15.686	15.759	73	Act1	Tube_017.fcs	10436	112913	7155	229375	14534.9	3.14212e+06	199108	63367.4		W	0.5614	0.8052		0.9167	0.9567		0.696	0.7512
15.721	16.099	378	CT	Tube_018.fcs	6853	72831	249	225305	770.29	1.12653e+06	3851.45	3418.87		P value	<0.0001	0.0168		0.2266	0.7482		0.0005	0.0037
15.688	15.812	124	CT	Tube_020.fcs	9950	124757	710	265814	1512.76	2.14366e+06	12199.7	5691.06		Passed normality test (alpha=0.05)?	No	No		Yes	Yes		No	No
15.673	15.897	224	Act1	Tube_023.fcs	4272	151891	1147	753766	5692.04	3.36503e+06	25410.9	7551.47		P value summary	****	*		ns	ns		***	**
15.717	16.208	491	CT	Tube_024.fcs	6720	102685	1923	323947	6066.61	1.61973e+06	30333	18727.2		Mann Whitney test
15.722	15.881	159	CT	Tube_027.fcs	7692	83626	243	230482	669.735	1.44958e+06	4212.17	2905.79		P value	0.0422			0.7844			0.0493
15.653	15.804	151	Act1	Tube_028.fcs	6653	102991	456	328184	1453.06	2.17341e+06	9622.91	4427.57		Exact or approximate P value?	Exact			Exact			Exact
15.673	16.052	379	Act1	Tube_029.fcs	7652	27778	0	76959.4	0	384797	0	0		P value summary	*			ns			*
														Significantly different (P < 0.05)?	Yes			No			Yes
		Resuspend tumour lysates according to tumour weight. E.g. 350mg of tumour resusoended in 350uL FACS buffer. Then, 200uL of each tumour suspension were taken for analysis												One- or two-tailed P value?	Two-tailed			Two-tailed			Two-tailed
														Sum of ranks in column A,B	123 , 153			151 , 125			124 , 152
														Mann-Whitney U	32			60			33
		Added 21200 count beads per tube
