# Supplementary material for: Oxygen levels at the time of activation determine T cell persistence and immunotherapeutic efficacy
Source: eLife journal article supplement (doi:10.7554/elife.84280), 2023-05-11
Supplement: fig6-figsupp1-data1 [file Figure 6 - figure supplement 1 - Source Data 1.xlsx]

## Sheet: Fig6 - Fig S1B
days in low oxygen	0	1 day		first 3 days		last 3 days
%O2	21	5	1	5	1	5	1
PC046d		9.91	10.6
		2.48	2.46
		13.2	22.9
		18.9
PC046e		14.9	8.93
		34.9	25
		21.2	14.9
		37.9	25.9
PC046f	8.64	4.83	6.27	9.08	4.48	8.51	9.74
PC046g		6.47	5.55			5.23	5.62
	2.57	1.12	1.14	5.18	25	2.62	2.95
	5.2	3.24	2.46	31.7	39	4.55	4.74
LK010d	11.7	13.3	11.5	3.65	27.1	12.1	7.48
	14.1	13.1	11.5	2.77	28	12.7	8.35
LK010c	16.6	16.6	15.6	3.85	26.8	14	23.6
	18	16.5	14.4	1.26	21.4	15.7	20.2
LK010b	5.58	10.9	9.65	8.93	4.4	6.77	3.15
	7.44	5.64	7.2	3.56	5.16	4.14	4.13
Shapiro-Wilk test
W	0.9476	0.8895	0.9295	0.6407	0.8616	0.9201	0.7891
P value	0.6642	0.0378	0.2136	0.0003	0.0999	0.3578	0.0107
Passed normality test (alpha=0.05)?	Yes	No	Yes	No	Yes	Yes	No
P value summary	ns	*	ns	***	ns	ns	*
Dunn's multiple comparisons test		21 vs. 5	21 vs. 1	21 vs. 5	21 vs. 1	21 vs. 5	21 vs. 1
Mean rank diff.		-5.444	-1.516	14.67	-16.11	4.978	6.878
Significant?		No	No	No	No	No	No
Summary		ns	ns	ns	ns	ns	ns
Adjusted P Value		>0.9999	>0.9999	>0.9999	0.9075	>0.9999	>0.9999

## Sheet: Fig6 - Fig S1C-F
HER2 CAR
Data summary										Resazurin absorbance values																				% cytotoxicity
	21% CT 1	first 3d5%	first 3d 1%	21% CT 2	last 3d5%	last 3d1%		PC046f donor #03		21% CT 1		first 3 days at 5%		first 3 days at 1%						21% CT 2		last 3 days at 5%		last 3 days at 1%						21% CT 1		first 3 days at 5%		first 3 days at 1%		21% CT 2			last 3 days at 5%			last 3 days at 1%
[Agonist] vs. normalized response									T cell #\donor	3		3		3						3		3		3						3		3		3		3			3			3
Best-fit values									20000			12134		10983						8106		9344		8273								39.0013		55.5232		94.7274			74.7349			92.0305
EC50	0.3119	0.5026	0.457	0.3465	0.5311	0.393			10000	10782		12286		10970						8078		10722		9173						58.4084		36.8195		55.7098		95.1795			52.4816			77.4964
logEC50	-0.506	-0.2988	-0.3401	-0.4604	-0.2748	-0.4057			5000	11229		13342		11991						9282		12144		10376						51.992		21.6613		41.054		75.7361			29.5177			58.0691
95% CI (profile likelihood)									2500	12744		13363		12797						10737		12848		11398						30.2452		21.3599		29.4844		52.2393			18.1488			41.5648
EC50	0.2212 to 0.4413	0.2774 to 0.9282	0.1476 to 1.400	0.2846 to 0.4229	0.3875 to 0.7362	0.2858 to 0.5460			1250	15561		14182		13349		pos				11898		12985		12005		pos CT				-10.1909		9.60372		21.5609		33.4903			15.9364			31.7624
logEC50	-0.6553 to -0.3552	-0.5569 to -0.03236	-0.8309 to 0.1461	-0.5457 to -0.3738	-0.4117 to -0.1330	-0.5440 to -0.2628			625	15097		17548		13835		14851				13170		13286		12226		13971.8				-3.53048		-38.7129		14.5847		12.9488			11.0755			28.1935
Goodness of Fit									312.5	15214		14086		13597		neg				13801		12992		12563		neg CT				-5.20993		10.9817		18.001		2.75879			15.8233			22.7513
Degrees of Freedom	22	23	23	28	27	26			156.25	14690		14566		13706		7884.5				13780		12813		12260		7779.5				2.31173		4.09166		16.4364		3.09792			18.714			27.6444
R squared	0.8114	0.4324	-0.3918	0.8978	0.6159	0.6366				Resazurin absorbance values																				% cytotoxicity
Sum of Squares	4217	10725	29592	2179	3928	4093		PC046g donor #07 #16 #17			21% CT 1		first 3 days at 5%			first 3 days at 1%				21% CT 2			last 3 days at 5%			last 3 days at 1%				21% CT 1		first 3 days at 5%		first 3 days at 1%		21% CT 2			last 3 days at 5%			last 3 days at 1%
Sy.x	13.84	21.59	35.87	8.821	12.06	12.55			T cell #\donor		16	17		16	17		16	17		7	16	17	7	16	17	7	16	17		16	17	16	17	16	17	7	16	17	7	16	17	7	16	17
Constraints									20000		8710	8453		9156	10379		11504	11385			9914			10766						90.3065	92.4644	86.5618	76.2932	66.8475	67.8466		75.7931			66.8376
EC50	EC50 > 0	EC50 > 0	EC50 > 0	EC50 > 0	EC50 > 0	EC50 > 0			10000		9413	9873		9985	12833		12494	12524			10908	11540		11691	11518		12314	12119		84.404	80.5417	79.6013	55.6889	58.5352	58.2833		65.3451	58.7021		57.1149	58.9333		50.5665	52.6162
									5000		12352	10339		10532	13457		13518	13805		11681	12426	12764		12647	12398		14073	12513	plate1	59.7275	76.6291	75.0086	50.4496	49.9374	47.5277	55.0734	49.3893	45.8366		47.0664	49.6836		32.0776	48.4748
Number of points									2500		13225	13066		12082	14150		14400	14617		12464	13300	14559	12100	14353	14143	12429	14686	13811	17124.8	52.3975	53.7325	61.9944	44.631	42.532	40.71	46.4935	40.2027	26.9692	50.4821	29.1345	31.3418	46.8771	25.6343	34.8315
# of X values	120	120	120	120	120	120			1250		14692	14267		13656	15815		14872	14954		13628	14484	14838	13400	12824	14799	12895	14205	14321	7611	40.0803	43.6487	48.7788	30.6513	38.5689	37.8805	33.7388	27.7576	24.0367	36.2371	45.2059	24.4466	41.7708	30.6902	29.4709
# Y values analyzed	23	24	24	29	28	27			625		17004	16158		15277	16499		15983	15784		14402	15286	15831	14188	15669	14671	13964	15935	15309	plate2	20.6682	27.7714	35.1685	24.9083	29.2407	30.9116	25.2575	19.3277	13.5992	27.6025	15.302	25.792	30.057	12.506	19.086
EC50 values (E:T ratio)									312.5		16339	17073		16356	16558		16825	16587	19465.6	16377	16220	16241	14454	16569	16133	15100	17141	15246	16707	26.2517	20.0888	26.1089	24.4129	22.1711	24.1694	3.61604	9.5104	9.28966	24.6877	5.84204	10.4249	17.609	-0.170279	19.7482
	21% CT 1	first 3d5%	first 3d 1%	21% CT 2	last 3d5%	last 3d1%			156.25		18414	18157		18086	17725		17619		7555.5	15907	16434	16478	15219	16743	15955	15159	16241	16523	7581	8.82948	10.9873	11.5834	14.6145	15.5045	163.438	8.76616	7.26103	6.79855	16.3051	4.01312	12.2958	16.9625	9.28966	6.32555
PC046f	0.7488	2.233	0.7703	0.2202	0.8772	0.26
PC046g				0.2959	0.1895	0.1884
	0.216	0.1379	0.3853	0.4354	0.5408	0.8028
	0.1725	0.3971	0.2308	0.5889	0.4876	0.5001
Normality test									7488	22330	7703	2202	8772	2600
Shapiro-Wilk test												2959	1895	1884
W	0.8063	0.8412	0.9426	0.9658	0.973	0.9251			2160	1379	3853	4354	5408	8028
P value	0.1295	0.2172	0.5381	0.8155	0.8602	0.5659			1725	3971	2308	5889	4876	5001
Passed normality test (alpha=0.05)?	Yes	Yes	Yes	Yes	Yes	Yes
P value summary	ns	ns	ns	ns	ns	ns
Statistical analysis
Paired t test vs 21%
P value		0.3736	0.2025		0.4965	0.6642
P value summary		ns	ns		ns	ns
Significantly different (P < 0.05)?		No	No		No	No
One- or two-tailed P value?		Two-tailed	Two-tailed		Two-tailed	Two-tailed
t, df		t=1.136, df=2	t=1.869, df=2		t=0.7718, df=3	t=0.4798, df=3
Number of pairs		3	3		4	4
CD19 CAR
Cytotox assay															ELISA
LK010c (E:T ratio = 0.5)		0.21		first 3d 5%		first 3d 1%		last 3d 5%		last 3d 1%					IFNg (pg/ml)
donor		110	111	110	111	110	111	110	111	110	111				0.21	first 3d5%	first 3d 1%	last 3d5%	last 3d 1%
RAJI counts	CD19 CAR	4817.42	8722.3	1787.64	4949.13	4408.09	3965.89	3852.07	2723.15	9947.43	11918.4				18.8724	8.48665	0	38.1602	25.4006
	VC	11456.5	18156.7	7335.02	9367.94	8446.05	14083.2	13440	15158.6	16493.4	26726.5				0	0.178042	0	8.78338	12.9377
%cytotox		57.9503	51.9609	75.6287	47.1694	47.8089	71.8397	71.3387	82.0357	39.6885	55.4059				3.21503	7.80793	13.2359	25.3445	25.5532
															7.49478	0.709812	11.5658	24.0919	28.6848
LK010d (E:T ratio = 0.5)		0.21		first 3d 5%		first 3d 1%		last 3d 5%		last 3d 1%
donor		120	121	120	121	120	121	120	121	120	121			Normality test
RAJI counts	CD19 CAR	14056.5	12163.8	9816.99	4475.59	4048.36	2357.83	3731.95	2613.02	5342.56	834.257			Shapiro-Wilk test	0.9181	0.7952	0.7827	0.9591	0.8073
	VC	20421.1	19688.4	14318.9	10846.2	16335.3	14768.9	2629.84	4161.58	4900.32	4980.68			W	0.5264	0.0939	0.0746	0.773	0.1159
%cytotox		31.1668	38.2186	31.4403	58.736	75.2171	84.0352	-41.9078	37.2109	-9.0248	83.2501			P value	Yes	Yes	Yes	Yes	Yes
														Passed normality test (alpha=0.05)?	ns	ns	ns	ns	ns
Normality test														P value summary
Shapiro-Wilk test	0.21	first 3d5%	first 3d 1%	last 3d5%	last 3d1%									Statistical analysis
W	0.9411	0.9993	0.9006	0.8751	0.9711									P value vs 21%	0.8604	0.4259		0.0101	0.0241
P value	0.6612	0.9981	0.4341	0.3181	0.8486									P value summary	ns	ns		*	*
Passed normality test (alpha=0.05)?	Yes	Yes	Yes	Yes	Yes									Significantly different (P < 0.05)?	No	No		Yes	Yes
P value summary	ns	ns	ns	ns	ns									One- or two-tailed P value?	Two-tailed	Two-tailed		Two-tailed	Two-tailed
														t, df	t=0.1915, df=3	t=0.9188, df=3		t=5.818, df=3	t=4.235, df=3
Statistical analysis														Number of pairs	4	4		4	4
Paired t test vs 21%
P value		0.273	0.1535	0.7597	0.9017
P value summary		ns	ns	ns	ns
Significantly different (P < 0.05)?		No	No	No	No
One- or two-tailed P value?		Two-tailed	Two-tailed	Two-tailed	Two-tailed
t, df		t=1.339, df=3	t=1.901, df=3	t=0.3350, df=3	t=0.1343, df=3
Number of pairs		4	4	4	4

## Sheet: Fig6 - Fig S1G-I
							0.21	1d5%	1d1%
Data summary							Resazurin absorbance values													% cytotoxicity															ELISA
	0.21	1d5%	1d1%		PC046d donor #1 #4 #5	T cell #\donor	#1	#4	#5	#1	#4	#5	#1	#4	#5					#1	#4	#5	#1	#4	#5	#1	#4	#5
[Agonist] vs. normalized response						80000	7709													97.3028																STD curve
Best-fit values						40000	7615			7583	7722		7744	7617						98.3265			98.675	97.1612		96.9216	98.3047									pg/ml
EC50	0.222	0.2275	0.156			20000	7638	7834	8378	7612	7860		7587	7632	7981					98.076	95.9415	90.017	98.3592	95.6583		98.6314	98.1414	94.3406								2000	0.304
logEC50	-0.6536	-0.6429	-0.807			10000	8263	7678	9708	7603	7666	7830	7892	7647	8811	16643.6				91.2694	97.6404	75.5326	98.4572	97.7711	95.985	95.3098	97.978	85.3014								1000	0.29
95% CI (profile likelihood)						5000	9755	7628	12514	8050	7643	8450	8641	7622	10579	neg CT				75.0208	98.1849	44.9739	93.5891	98.0216	89.2329	87.1528	98.2503	66.047								500	0.209
EC50	0.1827 to 0.2689	0.1871 to 0.2760	0.1288 to 0.1879			2500	12919	8363		10966	9892	11525	11540	8880	13251	7461.33				40.5632	90.1804		61.8324	73.5288	55.7446	55.5812	84.55	36.9476								250	0.154
logEC50	-0.7382 to -0.5703	-0.7280 to -0.5591	-0.8902 to -0.7261				Resazurin absorbance values													% cytotoxicity																125	0.1
Goodness of Fit					PC046e donor #04 #8 #14 #15	T cell #\donor	#04	#8	#14	#15	#04	#8	#14	#15	#04	#8	#14	#15		#04	#8	#14	#15	#04	#8	#14	#15	#04	#8	#14	#15					62.5	0.071
Degrees of Freedom	56	62	54			20000	8141				8416				8434				plate1	99.3112				97.3464				97.2178								31.25	0.051
R squared	0.8453	0.807	0.8167			10000	8478	9909	9176	17028	9238	10927	8673	13997	9437	10270	8439	16639	22041.5	96.9035	87.4504	92.3843	39.5317	91.4737	80.5982	95.7701	59.9337	90.052	85.0205	97.3451	38.5978					15.625	0.043
Sum of Squares	10661	13202	8591			5000	9282	14760	12044	18230	11669	14009	11283	17038	12235	12729	11039	18153	8044.58	91.1594	54.7979	73.0795	31.441	74.1056	59.8529	78.2019	39.4644	70.0619	68.4687	79.8443	27.7811					7.8125	0.034
Sy.x	13.8	14.59	12.61			2500	15581	18514	18141	19429	17246	18067	17066	19358	16195	17876	17229	19364	plate2	46.1566	29.5293	32.04	23.3704	34.2611	32.5381	39.276	23.8483	41.7699	33.8238	38.1788	19.1292					3.90625	0.031
Constraints						1250	18360	19168	20101	19616	19490	19451	18844	21016	19206	18270	19419	18294	22901	26.3022	25.1272	18.8471	22.1117	18.229	23.2223	27.3081	12.6881	20.258	31.1717	23.4377	26.7738					1.95312	0.031
EC50	EC50 > 0	EC50 > 0	EC50 > 0			625	18529				18658				19483				8044.58	25.0948				24.1732				18.279								0	0.038
							Resazurin absorbance values													% cytotoxicity
Number of points					PC046f donor #03 #9	T cell #\donor	#3	#9	#3	#9	#3	#9								#3	#9	#3	#9	#3	#9
# of X values	130	130	130			20000	8015		7877		7857									97.0389		99.3607		99.6972
# Y values analyzed	57	63	55			10000	8582		9210		7889		plate1							87.4994		76.9336		99.1588														1:2 ET ratio	IFNg (pg/ml)
	EC50 values (E:T ratio)					5000	9820	14201	9518	13772	8277	12688	13782.7							66.6706	17.2425	71.7516	22.8463	92.6309	37.0061												21% n1	0.065	179.4		Shapiro-Wilk test	0.21	1%1day
	0.21	1d5%	1d1%			2500	10925	14383	12415	13987	10099	13260	7839							48.0795	14.8651	23.0109	20.0379	61.9765	29.5343												21% n2	0.042	41.4		W	0.824	0.9561
PC046d	0.2158	0.09667	0.1307			1250	12737	14929	12859	14378	10902	13918	plate2							17.5934	7.733	15.5408	14.9304	48.4664	20.9392												21% n3	0.066	185.4		P value	0.0956	0.7893
	0.02395	0.06234	0.03527			625	14821	15273	13924	15064	12173	14389	15521							-17.4689	3.2395	-2.37731	5.96956	27.0825	14.7868												21% n4	0.062	161.4		Passed normality test (alpha=0.05)?	Yes	Yes
	0.4264	0.1284	0.2826			312.5	14967	15135	12711	14972	11779	14759	7865.5							-19.9253	5.04213	18.0309	7.17131	33.7113	9.95363												21% n5	0.067	191.4		P value summary	ns	ns
PC046e	0.1875	0.2736	0.2711			156.25	13504	15576	12441	14992	11641	14268								4.689	-0.718438	22.5735	6.91006	36.0331	16.3673												21% n6	0.054	113.4
	0.3776	0.3732	0.2953				Resazurin absorbance values													% cytotoxicity																	1% n1	0.107	431.4		Paired t test
	0.304	0.2378	0.2438		PC046g donor #07 #16 #17	T cell #\donor	#7	#16	#17	#7	#16	#17	#7	#16	#17					#7	#16	#17	#7	#16	#17	#7	#16	#17									1% n2	0.092	341.4		P value	0.0019
	1.113	0.7438	1.229			20000		8097	7860		8333	7789									94.8405	97.0339		92.6564	97.6909												1% n3	0.138	617.4		P value summary	**
PC046f	0.3549	0.3753	0.09894			10000		8321	8129		8570	8854		8396	7798						92.7674	94.5443		90.463	87.8347		92.0733	97.6077									1% n4	0.117	491.4		Significantly different (P < 0.05)?	Yes
	1.959	1.246	0.6255			5000	11681	9701	9385	11649	9649	10586	10155	9144	8552	plate1				55.0734	79.9959	82.9204	55.4241	80.4772	71.8055	71.7949	85.1508	90.6296									1% n5	0.122	521.4		One- or two-tailed P value?	Two-tailed
PC046g	0.2959	0.2427	0.1951			2500	12464	11752	11683	12428	11211	12389	11296	10874	10515	16707				46.4935	61.0145	61.6531	46.888	66.0213	55.1192	59.2921	69.1401	72.4626									1% n6	0.17	809.4		t, df	t=5.930, df=5
	0.1461	0.1189	0.09409			1250	13628	13671	13842	12899	12959	13889	13493	12592	12586	7581				33.7388	43.2547	41.6721	41.7269	49.8441	41.2372	35.2181	53.2405	53.2961													Number of pairs	6
	0.1463	0.1623	0.09672			625	14402	15032	15492	14095	14681	14838	15231	14011	14288	plate2				25.2575	30.659	26.4019	28.6215	33.9074	32.4544	16.1736	40.1081	37.5445
	outlier determined with ROUT method (Q=1%)					312.5	16377	16705	16466	15587	16010	16272	14677	15190	15911	18344.8				3.61604	15.1759	17.3878	12.2726	21.6079	19.1832	22.2441	29.1968	22.5241
Normality test						156.25	15907	17012	17090	15464	16279	16538	15159	16272		7539.5				8.76616	12.3347	11.6128	13.6204	19.1184	16.7214	16.9625	19.1832
Shapiro-Wilk test
W	0.8589	0.8447	0.8348
P value	0.0741	0.0651	0.0506
Passed normality test (alpha=0.05)?	Yes	Yes	Yes
P value summary	ns	ns	ns		2158	966.7
Statistical analysis					239.5	623.4
Paired t test vs 21%					4264	1284
P value		0.286	0.0291		1875	2736
P value summary		ns	*		3776	3732
Significantly different (P < 0.05)?		No	Yes		3040	2378
One- or two-tailed P value?		Two-tailed	Two-tailed
t, df		t=1.143, df=8	t=2.593, df=9		3549	3753
Number of pairs		9	10
					2959	2427
					1461	1189
					1463	1623

## Sheet: Fig6 - Fig S1H-J
		Control				Last 3 days hypoxic CAR-T cells								1 day hypoxic T cells								First 3 days hypoxic CAR-T cells
		0.21				0.05				0.01				5% 1day				1% 1 day				0.05				0.01
	E:T ratio\donor	110	111	121	121	110	111	120	121	110	111	120	121	110	111	120	121	110	111	120	121	110	111	120	121	110	111	120	121
RQR8-CD19 CAR (RAJi counts)	1	920.042	1554.03	7458.87	8940.53	210.532	914.667	3759.34	2240.1	1147.33	355.097	1778.96	374.277	1074.07	636.865	2706.22	904.997	695.925	501.862	1769.36	954.849	774.843	204.397	656.769	889.214	4345.06	7012.4	1346.94				EC50			Cytotoxicity assay with CD19 CAR T cells
	0.5	4057.64	7241.93	12070.7	7323.62	1424.78	4162.99	9032.68	4037.05	3697.39	3474.25	4781.75	872.727	3334.29	3985.41	5086.92	2744.77	2811.7	2688.89	3308.59	1782.75	2578.48	1081.49	1440.62	1207.1	8780.97	10435.5	3991.7	725.441		Donor	0.21	1%1day		LK010c (E:T ratio = 0.5)		0.21		5%1d		1%1d
	0.25	6115.24	12367.6	14208	14925	3815.63	6649.11	13913.3	7187.6	5374.56	7119.17	10329.5	4492.18	6349.91	8390.95	7039.27	4623.82	4589.78	5749.28	6215.03	4569.9	6389.24	3024.88	2295.77	1727.43	11736.7	14521.9	4571.72	1906.9		110	0.4826	0.1153		donor		110	111	110	111	110	111
	0.125	12609.2	16148.7	16944.1	17708.2	5169.44	7337.09	13850.1	11750.4	6286.27	7487.91	13943.2	10049	7034.42	10256.7	9545.72	7188.25	6402.81	8614.41	8194.14	7418.37	9729.6	5655.1	3531.16	3061.42	11033.8	12534.1	8615.76	3072.28		111	0.7489	0.06146		RAJI counts	CD19 CAR	4817.42	8722.3	3965	4724.35	3396.66	3048.89
Vector control (RAJi counts)	1	4367.85	6963.64	14135	12144.5	2094.2	2804.65	11024.2	7590.46	3432.67	7737.14	7409.18	4021.2	2391.54	5713.88	8072.27	6500.38	6253.53	9509.29	13798.4	6820.8	4724.01	3210.34	1415.64	1493.6	10057.1	16623.6	1964.21	1981.29		120	1.106	0.2028			VC (RQR8 alone)	11456.5	18156.7	5839.12	13345.1	13040.3	24814.5
	0.5	7062.35	11087.1	14758.9	14654.4	4977.03	5661.02	13030.5	9713.29	5858.51	9843.39	12774.6	8161.31	3662.57	8978.65	10430.3	9505.36	9929.33	19882.6	14694.4	13081.9	8374.55	7936.55	1483.83	2098.52	13193.2	21547.6	3191.89	3444.92		121	1.745	0.153		%cytotox		57.9503	51.9609	32.096	64.5987	73.9527	87.7133
	0.25	9844.71	13219.7	20740.7	13868.3	6798.58	8940.64	17144.3	14256.3	8396.74	11942.1	17663.3	14285.6	6330.02	12584.4	9521	5062.19	12829.6	24071.2	13682.4	13505.6	13384.8	13922.7	1520.32	5558.25	17406.5	25109.9	4249.6	4476.72
	0.125	14446.1	18409.6	21087.6	18148.8	8274.03	11078.5	17115.7	12176.6	14825.5	16104.8	17572.9	15482.3	11631.3	16432.6	13172.3	9470.93	16771	29722.1	11858.8	11286.1	17308.6	23100	2387.18	6960.98	20530.1	27103.3	5443.66	6257.94		Shapiro-Wilk test				LK010d (E:T ratio = 0.5)		0.21		5%1d		1%1d
% Cytotox	1	78.9361	77.6837	47.2312	26.3822	89.9469	67.3875	65.8993	70.4879	66.5761	95.4105	75.9898	90.6924	55.0887	88.8541	66.475	86.0778	88.8715	94.7224	87.177	86.0009	83.5978	93.6332	53.6064	40.4651	56.7962	57.8167	31.4259			W	0.9597	0.9991		donor		120	121	120	121	120	121
	0.5	42.5454	34.6812	18.2142	50.0245	71.373	26.4622	30.6807	58.4379	36.8885	64.7048	62.5684	89.3065	8.9632	55.6123	51.2295	71.124	71.6829	86.4762	77.4839	86.3725	69.2105	86.3733	2.91204	42.4785	33.4432	51.5699	-25.0573	78.9417		P value	0.7772	0.9973		RAJI counts	CD19 CAR	14056.5	12163.8	7121.69	4063.6	4048.36	2357.83
	0.25	37.883	6.44542	31.497	-7.6193	43.876	25.6305	18.8464	49.5831	35.9923	40.3858	41.5197	68.5545	-0.314165	33.3228	26.0659	8.65972	64.2251	76.1155	54.5764	66.1628	52.2648	78.2737	-51.0056	68.9213	32.5726	42.1668	-7.58006	57.4041		Passed normality test (alpha=0.05)?	Yes	Yes			VC (RQR8 alone)	20421.1	19688.4	12190.5	11299.7	16335.3	14768.9
	0.125	12.7153	12.2814	19.649	2.4275	37.5221	33.7719	19.0798	3.50015	57.5981	53.5051	20.6555	35.0938	39.5217	37.5833	27.532	24.102	61.8221	71.0168	30.9026	34.2699	43.7875	75.519	-47.9219	56.0203	46.2554	53.7544	-58.2716	50.9059		P value summary	ns	ns		%cytotox		31.1668	38.2186	41.5799	64.0379	75.2171	84.0352
																															Paired t test
																															P value	0.0417
	ELISA																														P value summary	*
	IFNg (pg/ml)																														Significantly different (P < 0.05)?	Yes
	0.21	1d5%	1d1%																												One- or two-tailed P value?	Two-tailed
	18.8724	20.3561	26.2908																												t, df	t=3.425, df=3
	0	9.67359	27.181																												Number of pairs	4
	3.21503	6.76409	13.8622
	7.49478	21.7954	20.9603
Normality test
Shapiro-Wilk test
W	0.9181	0.8594	0.8958
P value	0.5264	0.2581	0.4103
Passed normality test (alpha=0.05)?	Yes	Yes	Yes
P value summary	ns	ns	ns
Statistical analysis
P value vs 21%		0.0892	0.0432
P value summary		ns	*
Significantly different (P < 0.05)?		No	Yes
One- or two-tailed P value?		Two-tailed	Two-tailed
t, df		t=2.481, df=3	t=3.377, df=3
Number of pairs		4	4

## Sheet: Fig6 - Fig S1K
	0.21	1%1day																								0.21	1%1day
CD8 CAR-T cells																									PBMC CAR-T cells
	Resazurin absorbance values													% cytotoxicity												Resazurin absorbance values													% cytotoxicity
CAR-T cell# \ donor	31	32	33	34	31	32	33	34						31	32	33	34	31	32	33	34				CAR-T cell# \ donor	31	32	33	34	31	32	33	34						31	32	33	34	31	32	33	34
20000	14256	17116	13938	12650	12032	17355	12145	13086						78.4629	68.4478	79.5765	84.0868	86.2509	67.6109	85.8552	82.56				20000	11431	12688	11989	10685	14261	20189	13439	14597						88.1378	83.7092	86.1719	90.766	78.1674	57.2826	81.0634	76.9837
10000	18705	21597	16959	18421	14408	21088	15647	17517				pos CT	36662.6	62.8835	52.7564	68.9976	63.878	77.9306	54.5388	73.5919	67.0436				10000	14477	15472	16244	11800	18045	22769	17929	18859				pos CT	36448.2	77.4064	73.901	71.1812	86.8377	64.8361	48.193	65.2447	61.9683
5000	22111	25691	23766	22511	19759	25254	20140	21447		36567		neg CT	8105.67	50.9565	38.4201	45.161	49.5557	59.1926	39.9504	57.8585	53.2816				5000	20098	21186	20697	17478	21968	24680	22180	21773		37049		neg CT	8064	57.6032	53.7701	55.4928	66.8337	51.015	41.4604	50.2681	51.702
2500	27675	29591	27303	28226	24969	29217	25348	26055		36404				31.4726	24.7632	32.7752	29.5431	40.9484	26.0728	39.6212	37.1454				2500	23229	24630	23914	22246	23893	26034	24824	25083		36627				46.5724	41.6365	44.1591	50.0356	44.2331	36.6901	40.9531	40.0406
1250	29993	32598	30648	30828	28029	30689	29173	27942		36531	8116			23.3554	14.2333	21.0618	20.4315	30.2329	20.9182	26.2269	30.5376				1250	28233	27045	26989	26033	26024	27645	29868	27118		36918	8079			28.9429	33.1283	33.3256	36.6937	36.7254	31.0144	23.1826	32.8711
625	32652	33595	32748	32349	30476	32719	29351	28613		36765	8102			14.0442	10.742	13.7081	15.1053	21.6641	13.8096	25.6036	28.1879				625	28205	28322	28856	26902	28399	28616	29345	29614		35079	8044			29.0415	28.6293	26.748	33.6321	28.358	27.5935	25.0252	24.0775
312.5	34518	35062	34374	34667	33422	33462	31924	30297		37046	8099			7.50991	5.60494	8.01417	6.98815	11.3479	11.2078	16.5935	22.2909				312.5	30250	30872	30963	29504	29454	30955	31646	31304		36568	8069			21.8368	19.6454	19.3248	24.465	24.6412	19.353	16.9186	18.1235
Data summary																									Data summary
	0.21	1d1%																								0.21	1d1%
[Agonist] vs. normalized response																									[Agonist] vs. normalized response
Best-fit values																									Best-fit values
EC50	0.5721	0.404																							EC50	0.4738	0.3427
logEC50	-0.2425	-0.3936																							logEC50	-0.3244	-0.465
95% CI (profile likelihood)																									95% CI (profile likelihood)
EC50	0.5180 to 0.6322	0.3344 to 0.4884																							EC50	0.4374 to 0.5133	0.2960 to 0.3969
logEC50	-0.2856 to -0.1991	-0.4757 to -0.3113																							logEC50	-0.3591 to -0.2896	-0.5287 to -0.4013
Goodness of Fit																									Goodness of Fit
Degrees of Freedom	27	27																							Degrees of Freedom	27	27
R squared	0.9678	0.8781																							R squared	0.9792	0.9308
Sum of Squares	551.3	1918																							Sum of Squares	352.8	1174
Sy.x	4.519	8.429																							Sy.x	3.615	6.594
Constraints																									Constraints
EC50	EC50 > 0	EC50 > 0																							EC50	EC50 > 0	EC50 > 0
Number of points																									Number of points
# of X values	42	42																							# of X values	42	42
# Y values analyzed	28	28																							# Y values analyzed	28	28
EC50 values (E:T ratio)																									EC50 values (E:T ratio)
	0.21	1d1%																								0.21	1d1%
31	0.5081	0.3113																							31	0.4726	0.275
32	0.8302	0.7477																							32	0.5979	0.5684
33	0.5076	0.3307																							33	0.4337	0.2923
34	0.5088	0.3601																							34	0.411	0.3103
Statistical analysis																									Statistical analysis
Paired t test vs 21%																									Paired t test vs 21%
P value	0.009																								P value	0.0452
P value summary	**																								P value summary	*
Significantly different (P < 0.05)?	Yes																								Significantly different (P < 0.05)?	Yes
One- or two-tailed P value?	Two-tailed																								One- or two-tailed P value?	Two-tailed
t, df	t=6.063, df=3																								t, df	t=3.316, df=3
Number of pairs	4																								Number of pairs	4

## Sheet: Fig6 - Fig S1L
	c1	c2	c3	c4	c5	c6	c7	c8	c9	c10	c11																		cell number
n1 21	16013	10641	12930	20757	25426	30992	34601	36655	37992	39907	41081	41943	posCT	41267	75.5316	91.5986	84.7525	61.3429	47.3785	30.7313	19.9372	13.7939	9.79512	4.06759	0.556303	-2.02183		days in 1%	0	1	3	7	0	1	3	7	0	1	3	7	0	1	3	7	0	1	3	7	0
1d 1%	10630	9786	10748	17324	24120	30330	33734	35901	37642	39097	40206	41542	negCT	7832	91.6315	94.1558	91.2786	71.6106	51.2846	32.7112	22.5303	16.0491	10.8419	6.4902	3.17332	-0.822491		cells/ml e6	6.58	6.91	3.85	0.62	7.41	5.41	3.79	0.89	6.97	5.1	4.74	0.819	5.63	7.25	3.79	0.99	7.14	5.8	4.46	0.69	4.57
3d 1%	17101	11627	12144	18477	24727	29487	33454	35396	37034	39021	39579	40989			72.2776	88.6496	87.1033	68.1621	49.4691	35.2325	23.3677	17.5594	12.6604	6.71751	5.0486	0.831464		c1	211500	222107	247500	93000	238179	173893	243643	133500	224036	163929	304714	122850	180964	233036	243643	148500	229500	186429	286714	103500	293786
7d 1%	15856	27377	30316	33464	34680	35834	37491	38617	39567	40296	40483	41213			76.0012	41.5433	32.7531	23.3378	19.7009	16.2494	11.2936	7.92583	5.08449	2.90414	2.34485	0.161507		c2	105750	111054	123750	46500	119089	86946.4	121821	66750	112018	81964.3	152357	61425	90482.1	116518	121821	74250	114750	93214.3	143357	51750	146893
n2 21	16418	11547	11586	18577	25587	30206	33460	35737	37548	38765	40175	40648			74.3203	88.8889	88.7722	67.863	46.897	33.0821	23.3498	16.5396	11.1231	7.48318	3.26604	1.85135		c3	52875	55526.8	61875	23250	59544.6	43473.2	60910.7	33375	56008.9	40982.1	76178.6	30712.5	45241.1	58258.9	60910.7	37125	57375	46607.1	71678.6	25875	73446.4
1d 1%	14867	10448	10073	13975	21735	28681	33652	35742	37677	38235	39445	7838			78.9592	92.1759	93.2974	81.627	58.4178	37.6432	22.7755	16.5246	10.7373	9.06834	5.44938	99.9821		c4	26437.5	27763.4	30937.5	11625	29772.3	21736.6	30455.4	16687.5	28004.5	20491.1	38089.3	15356.2	22620.5	29129.5	30455.4	18562.5	28687.5	23303.6	35839.3	12937.5	36723.2
3d 1%	15907	12449	10671	16655	22278	28016	32238	34865	36813	39082	39510	7833			75.8487	86.1911	91.5089	73.6115	56.7938	39.6321	27.0046	19.1476	13.3214	6.53507	5.25497	99.997		c5	13218.8	13881.7	15468.8	5812.5	14886.2	10868.3	15227.7	8343.75	14002.2	10245.5	19044.6	7678.12	11310.3	14564.7	15227.7	9281.25	14343.7	11651.8	17919.6	6468.75	18361.6
7d 1%	21093	29309	31754	33083	35368	37411	38278	39608	39851	40737	40962	7825			60.338	35.7649	28.4522	24.4773	17.6432	11.5328	8.93973	4.96187	4.23508	1.58517	0.912218	100.021		c6	6609.38	6940.85	7734.38	2906.25	7443.08	5434.15	7613.84	4171.88	7001.12	5122.77	9522.32	3839.06	5655.13	7282.37	7613.84	4640.62	7171.87	5825.89	8959.82	3234.38	9180.8
																												c7	3304.69	3470.42	3867.19	1453.12	3721.54	2717.08	3806.92	2085.94	3500.56	2561.38	4761.16	1919.53	2827.57	3641.18	3806.92	2320.31	3585.94	2912.95	4479.91	1617.19	4590.4
	c1	c2	c3	c4	c5	c6	c7	c8	c9	c10	c11																	c8	1652.34	1735.21	1933.59	726.562	1860.77	1358.54	1903.46	1042.97	1750.28	1280.69	2380.58	959.766	1413.78	1820.59	1903.46	1160.16	1792.97	1456.47	2239.96	808.594	2295.2
n3 21	12572	11414	16135	21630	26256	30467	34435	36274	37490	38931	39953	40712	posCT	39980.4	85.3612	88.9677	74.2645	57.1508	42.7435	29.6287	17.2707	11.5433	7.75615	3.26827	0.085335	-2.27851		c9	826.172	867.606	966.797	363.281	930.385	679.269	951.73	521.484	875.14	640.346	1190.29	479.883	706.892	910.296	951.73	580.078	896.484	728.237	1119.98	404.297	1147.6
1d 1%	12365	10484	11121	16439	24004	30383	34123	35960	37580	38730	40049	40419	negCT	7871.67	86.0059	91.8641	89.8802	73.3177	49.7572	29.8903	18.2424	12.5212	7.47585	3.89427	-0.213649	-1.36598		c10	413.086	433.803	483.398	181.641	465.193	339.634	475.865	260.742	437.57	320.173	595.145	239.941	353.446	455.148	475.865	290.039	448.242	364.118	559.989	202.148	573.8
3d 1%	18075	13381	13385	18473	25265	29838	33485	34787	36363	38095	39143	39973			68.2226	82.8416	82.8292	66.983	45.8299	31.5877	20.2294	16.1744	11.2661	5.87192	2.60801	0.0230467		c11	206.543	216.902	241.699	90.8203	232.596	169.817	237.932	130.371	218.785	160.086	297.573	119.971	176.723	227.574	237.932	145.02	224.121	182.059	279.994	101.074	286.9
7d 1%	23880	28362	30878	32969	35174	36577	38007	38008	39154	39362	39952	39355			50.1434	36.1845	28.3487	21.8364	14.9691	10.5996	6.14599	6.14288	2.57375	1.92596	0.0884495	1.94776			WT1				WT2				WT3				WT4				WT5				WT6
n4 21	15439	11323	10534	13089	20487	27143	32045	35088	35592	38069	39046	39443			76.4322	89.2511	91.7084	83.751	60.7106	39.981	24.7141	15.237	13.6673	5.9529	2.91011	1.67369
1d 1%	13566	10040	9075	11912	19303	25159	30567	34092	36140	38001	38703	7893			82.2655	93.2469	96.2523	87.4167	64.3981	46.16	29.3173	18.3389	11.9606	6.16468	3.97836	99.9336
3d 1%	15881	12103	10352	12776	20510	26389	30246	33352	35730	37375	38232	7881			75.0556	86.8219	92.2752	84.7259	60.639	42.3293	30.317	20.6436	13.2375	8.1143	5.44525	99.9709		cell#\days in 1%	0									1									3
7d 1%	19140	24444	28561	31749	34255	35729	37128	38112	39235	39736	39812	7841			64.9057	48.3868	35.5648	25.636	17.8313	13.2406	8.88356	5.81898	2.32149	0.761164	0.524468	100.096		21.15	75.5316
																												10.575	91.5986
	c1	c2	c3	c4	c5	c6	c7	c8	c9	c10	c11																	5.2875	84.7525
n5 21	11073	11957	17625	23225	27720	30903	33402	35740	37266	37433	38992	40284	posCT	40037	89.9857	87.2393	69.6299	52.2317	38.2666	28.3776	20.6137	13.35	8.60898	8.09014	3.24662	-0.767383		2.64375	61.3429
1d 1%	10628	9038	10919	16834	23919	28276	33199	35293	36507	38310	38632	39754	negCT	7849.67	91.3682	96.3081	90.4642	72.0874	50.0756	36.5392	21.2444	14.7387	10.967	5.36546	4.36507	0.879228		1.32187	47.3785
3d 1%	15960	11903	10871	13922	20573	26653	31390	34901	35964	38097	38551	39944			74.8027	87.4071	90.6133	81.1344	60.471	41.5816	26.8646	15.9566	12.654	6.02722	4.61672	0.288934		0.660938	30.7313
7d 1%	18950	23487	28077	31901	34477	35939	37197	38758	38983	40098	40042	40128			65.5133	51.4177	37.1575	25.277	17.2739	12.7317	8.82335	3.97361	3.27458	-0.189516	-0.0155341	-0.28272		0.330469	19.9372
n6 21	9892	17618	23094	29464	33239	35172	36487	38059	38604	39888	39711	40075			93.6549	69.6516	52.6387	32.8483	21.1201	15.1146	11.0292	6.14527	4.45206	0.462915	1.01282	-0.118059		0.165234	13.7939
1d 1%	8949	13998	20867	28886	32436	35139	37222	38355	38937	40199	39627	7863			96.5846	80.8983	59.5576	34.6441	23.6149	15.2172	8.74568	5.22566	3.41749	-0.503304	1.27379	99.9586		0.082617	9.79513
3d 1%	18953	11839	14903	19888	25115	29818	33061	35290	36933	38533	39441	7835			65.504	87.6059	78.0866	62.5992	46.3599	31.7485	21.6731	14.748	9.64355	4.67265	1.85166	100.046		0.041309	4.06759
7d 1%	18737	24906	29645	32875	34594	35878	37272	38445	38882	39425	39926	7851			66.1751	47.0092	32.286	22.251	16.9104	12.9212	8.59034	4.94605	3.58837	1.90137	0.344856	99.9959		0.020654	0.556303
																												23.8179		74.3203
	c1	c2	c3	c4	c5	c6	c7	c8	c9	c10	c11																	11.9089		88.8889
n7 21	12518	11440	16923	23460	27403	30381	33019	35744	37087	38363	39077	39907	posCT	39324.8	85.4006	88.8349	71.3673	50.5418	37.9803	28.493	20.0889	11.4076	7.12914	3.06409	0.789437	-1.85476		5.95446		88.7722
1d 1%	11094	9813	12474	18798	25821	30552	33008	35428	36998	38410	38958	39587	negCT	7935.33	89.9372	94.0182	85.5408	65.3939	43.0202	27.9482	20.1239	12.4144	7.41268	2.91435	1.16854	-0.835312		2.97723		67.863
3d 1%	14558	11662	11736	16729	25006	30109	33028	35088	37096	38031	38420	39227			78.9016	88.1277	87.8919	71.9853	45.6166	29.3595	20.0602	13.4975	7.10047	4.12176	2.8825	0.311569		1.48862		46.897
7d 1%	22828	27073	29549	31917	34431	36000	37029	37515	38949	38974	39054	38654			52.5552	39.0316	31.1436	23.5996	15.5906	10.5921	7.31392	5.76563	1.19722	1.11757	0.86271	2.13702		0.744308		33.0821
n8 21	11319	9708	9486	13938	23103	28761	32676	35601	36552	38199	38957	39249			89.2204	94.3527	95.0599	80.8768	51.6791	33.654	21.1816	11.8632	8.83354	3.58655	1.17173	0.241482		0.372154		23.3498
1d 1%	11658	9705	8990	11505	21885	27037	32634	36156	36924	38259	38345	8486			88.1404	94.3622	96.6401	88.6278	55.5594	39.1463	21.3154	10.0951	7.64843	3.39541	3.12143	98.2457		0.186077		16.5396
3d 1%	15264	12149	13234	19624	25817	30900	34110	36142	37969	38324	38386	7660			76.6525	86.5762	83.1196	62.7625	43.0329	26.8396	16.6132	10.1397	4.31928	3.18833	2.99081	100.877		0.093039		11.1231
7d 1%	22578	24329	29878	33108	35316	36603	38026	38249	38951	38759	38827	7660			53.3517	47.7734	30.0954	19.8054	12.7712	8.67106	4.13769	3.42726	1.19085	1.80252	1.58588	100.877		0.046519		7.48318
																												0.02326		3.26604
	c1	c2	c3	c4	c5	c6	c7	c8	c9	c10	c11																	22.4036			85.3612
n9 21	11553	15069	21032	25728	28610	31770	34122	35892	36975	37362	37267	37316	posCT	36692	87.8484	75.5617	54.724	38.3138	28.2426	17.2	8.98089	2.79561	-0.988946	-2.34132	-2.00934	-2.18057		11.2018			88.9677
1d 1%	11589	12276	15474	21584	26078	31455	33538	35611	36401	36997	36986	36792	negCT	8075.67	87.7226	85.3219	74.1465	52.795	37.0907	18.3007	11.0217	3.77756	1.0169	-1.06582	-1.02739	-0.349451		5.60089			74.2645
3d 1%	18544	14233	16427	17211	22643	28378	31981	33049	33961	35621	35698	36698			63.4183	78.4832	70.8162	68.0765	49.0943	29.0533	16.4626	12.7305	9.5435	3.74262	3.47354	-0.020967		2.80045			57.1508
7d 1%	18529	24677	28395	29436	31811	33965	35570	35907	36835	36218	36653	36525			63.4707	41.9865	28.9939	25.3561	17.0567	9.52952	3.92084	2.74319	-0.499715	1.6564	0.136286	0.583583		1.40022			42.7435
E	40	40	40	40	39	42	39	39	39	40	39	36129														1.96741		0.700112			29.6287
F	42	41	40	39	40	39	38	40	39	40	42	7967														100.38		0.350056			17.2707
G	42	41	41	40	40	39	43	38	39	39	39	8109														99.8835		0.175028			11.5433
H	42	41	40	42	40	40	39	40	39	39	39	8151														99.7367		0.087514			7.75615
																												0.043757			3.26827
																												0.021878			0.085335
	EC50 (E:T ratio)																											18.0964				76.4322
	0	1	3	7																								9.04821				89.2511
	1.4372	1.1446	1.3986	4.1546																								4.52411				91.7084
	1.4084	0.7396	1.0803	8.4051																								2.26205				83.7511
	1.8586	0.9463	2.0876	9.3078																								1.13103				60.7106
	0.7307	0.7598	0.8808	6.6905																								0.565513				39.981
	2.1334	0.9466	1.1565	4.409																								0.282757				24.7142
	6.1	4.434	2.119	5.339	WT6 identified as outlier ROUT Q=1%																							0.141378				15.237
	1.7995	1.2051	1.6653	9.1624																								0.070689				13.6673
	0.9524	0.7847	1.4341	7.4183																								0.035345				5.9529
	3.1301	1.1308	2.0106	6.1428																								0.017672				2.91011
																												22.95					89.9857
																												11.475					87.2393
	Dunnett's multiple comparisons test																											5.7375					69.6299
		0 vs. 1	0 vs. 3	0 vs. 7																								2.86875					52.2317
	Mean Diff.	0.8288	0.6353	-4.609																								1.43437					38.2666
	95.00% CI of diff.	0.1718 to 1.486	-0.6729 to 1.943	-7.387 to -1.830																								0.717188					28.3776
	Below threshold?	Yes	No	Yes																								0.358594					20.6137
	Summary	*	ns	**																								0.179297					13.35
	Adjusted P Value	0.0167	0.4124	0.0036																								0.089648					8.60898
	A-?	B	C	D																								0.044824					8.09014
		1	3	7																								0.022412					3.24662
																												29.3786						93.65485*
																												14.6893						69.65162*
																												7.34464						52.63872*
																												3.67232						32.84833*
																												1.83616						21.12011*
																												0.91808						15.11464*
																												0.45904						11.02918*
																												0.22952						6.145275*
																												0.11476						4.452062*
																												0.05738						0.462915*
																												0.02869						1.012821*
																												18.8036							85.4006
																												9.40179							88.8349
																												4.70089							71.3672
																												2.35045							50.5418
																												1.17522							37.9803
																												0.587612							28.493
																												0.293806							20.0889
																												0.146903							11.4077
																												0.073451							7.12914
																												0.036726							3.06408
																												0.018363							0.789437
																												19.7036								89.2204
																												9.85179								94.3527
																												4.92589								95.0599
																												2.46295								80.8768
																												1.23147								51.6791
																												0.615737								33.654
																												0.307868								21.1816
																												0.153934								11.8632
																												0.076967								8.83354
																												0.038484								3.58655
																												0.019242								1.17173
																												17.3893									87.8484
																												8.69464									75.5617
																												4.34732									54.724
																												2.17366									38.3138
																												1.08683									28.2426
																												0.543415									17.2
																												0.271708									8.98089
																												0.135854									2.79561
																												0.067927									-0.98895
																												0.033963									-2.34132
																												0.016982									-2.00934
																												22.2107										91.6315
																												11.1054										94.1558
																												5.55268										91.2786
																												2.77634										71.6106
																												1.38817										51.2846
																												0.694085										32.7112
																												0.347042										22.5303
																												0.173521										16.0491
																												0.086761										10.8419
																												0.04338										6.4902
																												0.02169										3.17332
																												17.3893											78.9592
																												8.69464											92.1759
																												4.34732											93.2974
																												2.17366											81.627
																												1.08683											58.4178
																												0.543415											37.6432
																												0.271708											22.7755
																												0.135854											16.5246
																												0.067927											10.7372
																												0.033963											9.06834
																												0.016982											5.44938
																												16.3929												86.0059
																												8.19643												91.8641
																												4.09821												89.8802
																												2.04911												73.3178
																												1.02455												49.7572
																												0.512277												29.8903
																												0.256138												18.2424
																												0.128069												12.5212
																												0.064035												7.47585
																												0.032017												3.89427
																												0.016009												-0.21365
																												23.3036													82.2655
																												11.6518													93.2469
																												5.82589													96.2523
																												2.91295													87.4167
																												1.45647													64.3981
																												0.728237													46.16
																												0.364118													29.3173
																												0.182059													18.3389
																												0.09103													11.9606
																												0.045515													6.16468
																												0.022757													3.97836
																												18.6429														91.3682
																												9.32143														96.3081
																												4.66071														90.4642
																												2.33036														72.0874
																												1.16518														50.0756
																												0.582589														36.5392
																												0.291295														21.2444
																												0.145647														14.7387
																												0.072824														10.9671
																												0.036412														5.36547
																												0.018206														4.36507
																												26.1643															96.58458*
																												13.0821															80.89828*
																												6.54107															59.55759*
																												3.27054															34.64406*
																												1.63527															23.61488*
																												0.817634															15.21717*
																												0.408817															8.745676*
																												0.204409															5.225658*
																												0.102204															3.417493*
																												0.051102															-0.5033*
																												0.025551															1.273793*
																												17.9036																89.9372
																												8.95179																94.0182
																												4.47589																85.5408
																												2.23795																65.3939
																												1.11897																43.0202
																												0.559487																27.9482
																												0.279743																20.124
																												0.139872																12.4144
																												0.069936																7.41268
																												0.034968																2.91435
																												0.017484																1.16854
																												18.6429																	88.1404
																												9.32143																	94.3622
																												4.66071																	96.6401
																												2.33036																	88.6278
																												1.16518																	55.5594
																												0.582589																	39.1463
																												0.291295																	21.3154
																												0.145647																	10.0951
																												0.072824																	7.64843
																												0.036412																	3.39541
																												0.018206																	3.12143
																												10.3821																		87.7226
																												5.19107																		85.3219
																												2.59554																		74.1465
																												1.29777																		52.795
																												0.648884																		37.0907
																												0.324442																		18.3007
																												0.162221																		11.0217
																												0.08111																		3.77756
																												0.040555																		1.0169
																												0.020278																		-1.06582
																												0.010139																		-1.02739
																												24.75																			72.2776
																												12.375																			88.6496
																												6.1875																			87.1033
																												3.09375																			68.1621
																												1.54688																			49.4691
																												0.773438																			35.2325
																												0.386719																			23.3677
																												0.193359																			17.5594
																												0.09668																			12.6604
																												0.04834																			6.71751
																												0.02417																			5.0486
																												24.3643																				75.8487
																												12.1821																				86.1911
																												6.09107																				91.5089
																												3.04554																				73.6115
																												1.52277																				56.7938
																												0.761384																				39.6321
																												0.380692																				27.0046
																												0.190346																				19.1476
																												0.095173																				13.3214
																												0.047586																				6.53507
																												0.023793																				5.25497
																												30.4714																					68.2226
																												15.2357																					82.8416
																												7.61786																					82.8292
																												3.80893																					66.983
																												1.90446																					45.8299
																												0.952232																					31.5877
																												0.476116																					20.2294
																												0.238058																					16.1744
																												0.119029																					11.2661
																												0.059515																					5.87192
																												0.029757																					2.60801
																												24.3643
																												12.1821
																												6.09107
																												3.04554
																												1.52277
																												0.761384
																												0.380692
																												0.190346
																												0.095173
																												0.047586
																												0.023793
																												28.6714
																												14.3357
																												7.16786
																												3.58393
																												1.79196
																												0.895982
																												0.447991
																												0.223996
																												0.111998
																												0.055999
																												0.027999
																												29.0571
																												14.5286
																												7.26429
																												3.63214
																												1.81607
																												0.908036
																												0.454018
																												0.227009
																												0.113504
																												0.056752
																												0.028376
																												26.55
																												13.275
																												6.6375
																												3.31875
																												1.65938
																												0.829688
																												0.414844
																												0.207422
																												0.103711
																												0.051855
																												0.025928
																												18.2571
																												9.12857
																												4.56429
																												2.28214
																												1.14107
																												0.570536
																												0.285268
																												0.142634
																												0.071317
																												0.035658
																												0.017829
																												25.0714
																												12.5357
																												6.26786
																												3.13393
																												1.56696
																												0.783482
																												0.391741
																												0.195871
																												0.097935
																												0.048968
																												0.024484
																												9.3
																												4.65
																												2.325
																												1.1625
																												0.58125
																												0.290625
																												0.145313
																												0.072656
																												0.036328
																												0.018164
																												0.009082
																												13.35
																												6.675
																												3.3375
																												1.66875
																												0.834375
																												0.417188
																												0.208594
																												0.104297
																												0.052148
																												0.026074
																												0.013037
																												12.285
																												6.1425
																												3.07125
																												1.53563
																												0.767813
																												0.383906
																												0.191953
																												0.095977
																												0.047988
																												0.023994
																												0.011997
																												14.85
																												7.425
																												3.7125
																												1.85625
																												0.928125
																												0.464063
																												0.232031
																												0.116016
																												0.058008
																												0.029004
																												0.014502
																												10.35
																												5.175
																												2.5875
																												1.29375
																												0.646875
																												0.323438
																												0.161719
																												0.080859
																												0.04043
																												0.020215
																												0.010107
																												10.95
																												5.475
																												2.7375
																												1.36875
																												0.684375
																												0.342188
																												0.171094
																												0.085547
																												0.042773
																												0.021387
																												0.010693
																												13.8
																												6.9
																												3.45
																												1.725
																												0.8625
																												0.43125
																												0.215625
																												0.107813
																												0.053906
																												0.026953
																												0.013477
																												12
																												6
																												3
																												1.5
																												0.75
																												0.375
																												0.1875
																												0.09375
																												0.046875
																												0.023438
																												0.011719
																												11.04
																												5.52
																												2.76
																												1.38
																												0.69
																												0.345
																												0.1725
																												0.08625
																												0.043125
																												0.021563
																												0.010781
																												cell#/days in 1%	0									1									3
[truncated: 15 more columns]

## Sheet: Fig6 - Fig S1N-O
						RAW counts		norm to beads		per g of tumour		per million CD45+			Fig 6J			Fig 6 S1N			Fig 6 S1O
C tube weight (g)	c tube + tumor	tumor	Condition	Sample:	#beads	CD45	OT-I	CD45	OT-I	CD45	OT-I	OT-I			per gram of tumour			Tumour weight (mg)			per million CD45+
15.667	16.017	350	CT	Tube_001.fcs	6315	36743	1	123349	3.35709	616747	16.7854	27.2161			21%	1d1%		21%	1d1%		21%	1d1%
15.718	16.066	348	Act1	Tube_002.fcs	5601	95828	503	362713	1903.87	1.81356e+06	9519.37	5248.99			17	9519		350	348		27	5249
15.665	15.792	127	CT	Tube_003.fcs	13507	8664	1	13598.6	1.56956	107076	12.3587	115.42			12	16051		127	426		115	7768
15.726	16.128	402	CT	Tube_004.fcs	10002	107294	226	227418	479.024	1.13709e+06	2395.12	2106.36			2395	63445		402	200		2106	18455
15.666	15.839	173	CT	Tube_005.fcs	9168	134953	1411	312064	3262.78	1.80384e+06	18860	10455.5			18860	133024		173	400		10455	23003
15.703	16.129	426	Act1	Tube_006.fcs	6201	120873	939	413241	3210.26	2.06621e+06	16051.3	7768.48			2002	85760		358	553		2089	18819
15.698	15.898	200	Act1	Tube_007.fcs	4638	150418	2776	687551	12688.9	3.43776e+06	63444.6	18455.2			1711	11153		311	44		1968	16594
15.679	16.079	400	Act1	Tube_008.fcs	5111	278828	6414	1.15656e+06	26604.7	5.78278e+06	133024	23003.4			4988	199108		318	73		1850	63367
15.726	16.084	358	CT	Tube_009.fcs	7782	70369	147	191702	400.463	958509	2002.31	2088.99			93955	25411		169	224		28391	7551
15.73	16.041	311	CT	Tube_010.fcs	8612	70634	139	173878	342.174	869392	1710.87	1967.89			2197	9623		86	151		2257	4428
15.719	16.272	553	Act1	Tube_011.fcs	6070	260963	4911	911436	17152.1	4.55718e+06	85760.5	18818.8			3851	0		378	379		3419	0
15.711	16.029	318	CT	Tube_012.fcs	7034	178876	331	539120	997.612	2.6956e+06	4988.06	1850.44			12200			124			5691
15.732	15.901	169	CT	Tube_013.fcs	7597	200415	5690	559273	15878.4	3.30931e+06	93954.9	28391.1			30333			491			18727
15.656	15.742	86	CT	Tube_014.fcs	10437	41205	93	83697	188.905	973221	2196.57	2257.01			4212			159			2906
15.655	15.699	44	Act1	Tube_016.fcs	13565	18922	314	29572.2	490.734	672095	11153	16594.4		Shapiro-Wilk test	21%	1d1%		21%	1d1%		21%	1d1%
15.686	15.759	73	Act1	Tube_017.fcs	10436	112913	7155	229375	14534.9	3.14212e+06	199108	63367.4		W	0.5614	0.8052		0.9167	0.9567		0.696	0.7512
15.721	16.099	378	CT	Tube_018.fcs	6853	72831	249	225305	770.29	1.12653e+06	3851.45	3418.87		P value	<0.0001	0.0168		0.2266	0.7482		0.0005	0.0037
15.688	15.812	124	CT	Tube_020.fcs	9950	124757	710	265814	1512.76	2.14366e+06	12199.7	5691.06		Passed normality test (alpha=0.05)?	No	No		Yes	Yes		No	No
15.673	15.897	224	Act1	Tube_023.fcs	4272	151891	1147	753766	5692.04	3.36503e+06	25410.9	7551.47		P value summary	****	*		ns	ns		***	**
15.717	16.208	491	CT	Tube_024.fcs	6720	102685	1923	323947	6066.61	1.61973e+06	30333	18727.2		Mann Whitney test
15.722	15.881	159	CT	Tube_027.fcs	7692	83626	243	230482	669.735	1.44958e+06	4212.17	2905.79		P value	0.0422			0.7844			0.0493
15.653	15.804	151	Act1	Tube_028.fcs	6653	102991	456	328184	1453.06	2.17341e+06	9622.91	4427.57		Exact or approximate P value?	Exact			Exact			Exact
15.673	16.052	379	Act1	Tube_029.fcs	7652	27778	0	76959.4	0	384797	0	0		P value summary	*			ns			*
														Significantly different (P < 0.05)?	Yes			No			Yes
		Resuspend tumour lysates according to tumour weight. E.g. 350mg of tumour resusoended in 350uL FACS buffer. Then, 200uL of each tumour suspension were taken for analysis												One- or two-tailed P value?	Two-tailed			Two-tailed			Two-tailed
														Sum of ranks in column A,B	123 , 153			151 , 125			124 , 152
														Mann-Whitney U	32			60			33
		Added 21200 count beads per tube
